# Supplementary material for: Developmental single-cell transcriptomics of hypothalamic POMC neurons reveal the genetic trajectories of multiple neuropeptidergic phenotypes
Source: eLife. 2022 Jan 19;11:e72883. doi: 10.7554/eLife.72883 (PMC8806186; doi:10.7554/eLife.72883)
Supplement: Figure 1—figure supplement 2—source data 1. [file elife-72883-fig1-figsupp2-data1.xlsx]

## Sheet: DsRed_clusteraverage
Figure 1-source data 3 (corresponding to Figure1-figure supplement 2). Average gene expression [exp(logNormalized counts)-1)] obtained from the Seurat analysis of each of the 9 DsRed clusters integrated across all six developmental stages
Gene expression data are sorted based on highest to lowest for integrated cluster DsRed-1/Prdm12 starting with Malat1.
Integrated Cluster:	DsRed-1/Prdm12	DsRed-2/Ebf1	DsRed-3/Nr4a2	DsRed-4/Otp	DsRed-5/Tac2	DsRed-6/Dlx5	DsRed-7/Pitx2	DsRed-8	DsRed-9
Gene	Neurons	Neurons	Neurons	Neurons	Neurons	Neurons	Neurons	Microglia	VLMC
Malat1	126.492	142.522	166.563	233.623	247.619	162.12	253.257	96.0355	115.049
Tuba1a	98.7841	179.4	123.933	66.17	60.4729	70.7312	171.16	13.8462	56.0211
Nnat	56.9468	49.7436	43.2016	50.1126	49.4863	43.5719	95.8257	6.38204	24.8952
Stmn1	50.2973	63.2143	60.9655	43.9988	50.1711	58.3823	86.1508	10.1623	21.7503
mt-Atp6	109.963	82.8399	100.145	98.2316	118.169	125.214	85.6631	113.282	85.2717
Tmsb10	77.154	86.0091	91.2541	72.3916	70.6875	89.9355	73.7598	15.1361	52.9814
Tubb2b	47.1663	65.5469	67.823	32.1831	34.8134	45.8435	73.0765	7.20053	18.0893
mt-Co3	72.2515	56.4802	68.2549	74.0313	80.6175	82.3947	65.8206	69.2393	59.9739
Actg1	42.1744	64.9664	46.965	36.0085	29.7279	37.4152	60.1307	25.4252	41.6223
Tubb5	43.3849	56.8189	47.5719	34.6404	33.2482	40.2076	56.134	12.458	30.9622
Ptma	31.8436	47.7842	34.4215	39.9655	35.6881	40.2426	55.3115	17.6824	36.8527
Eef1a1	57.1388	59.1153	45.1122	60.7652	57.9241	54.0859	54.7499	64.3328	57.957
Tmsb4x	54.3352	74.9869	54.911	63.6853	36.8461	36.3742	50.2225	244.442	71.4513
Ubb	40.2288	41.6364	36.4328	51.7944	49.3801	51.6163	49.7145	26.3614	34.0461
Actb	46.6805	46.5001	45.4017	43.3222	37.4707	47.116	49.4864	85.793	43.7554
Ftl1	33.6678	46.2002	31.3496	50.1105	33.216	34.5703	47.8156	76.9534	49.2056
mt-Cytb	55.112	40.1225	52.3309	48.6054	56.0559	58.9039	45.2125	65.0892	42.0879
mt-Co1	55.9614	40.8125	48.8048	52.0808	61.5415	56.7685	44.6679	65.2097	47.0949
Tubb3	27.7132	45.3665	33.3521	18.6653	21.2539	24.4466	42.5688	4.93213	8.07975
H3f3b	21.7533	27.3838	25.082	42.5272	37.913	33.3988	41.3763	19.7116	22.1121
mt-Co2	56.2262	38.0649	50.2986	39.3445	51.145	61.1087	38.8117	75.1095	43.0241
H3f3a	23.6186	33.0817	27.2706	35.3352	31.244	33.2787	38.5707	13.9546	22.9947
Meg3	40.9117	28.6918	64.9779	59.0176	55.6116	44.8525	36.7771	25.2813	20.7551
mt-Nd1	35.5773	35.4597	31.8555	44.6362	41.0133	32.506	34.5589	19.0959	33.5231
Rtn1	32.4546	32.1598	41.1586	25.1066	33.4717	30.6749	31.385	8.0225	8.32711
Hspa8	30.0115	24.4959	25.6274	33.4701	25.8605	27.2428	30.0259	20.4084	18.7789
Stmn2	35.0153	41.4669	33.0436	14.3251	28.4156	23.3741	27.9194	6.96495	7.90437
Marcksl1	19.6512	22.6437	20.5647	26.7147	21.2619	20.7593	27.765	3.85797	14.5786
Sox4	6.13656	8.25844	6.42608	10.6399	8.82826	10.6347	26.1945	2.30168	4.69165
Cd24a	8.09928	18.1799	12.1916	11.3608	5.75394	11.2458	23.6844	0.477418	5.2471
Rpl41	35.6188	32.1345	28.9905	42.7369	36.9775	35.7656	23.6699	32.9755	45.2603
mt-Nd4	25.6974	21.4727	24.5174	25.4356	27.6969	27.6372	23.5881	25.2354	23.2864
Cfl1	18.0739	23.1066	18.7235	18.0344	14.1655	16.6476	23.0699	17.3595	16.6168
Ppia	32.9484	33.9678	33.402	22.2204	22.2889	25.0627	22.2549	23.4327	39.9368
Basp1	18.3459	19.0886	27.639	11.3381	17.2819	23.7381	21.7594	12.3534	7.31822
Hsp90ab1	27.2155	25.1955	21.7433	27.9276	24.7157	26.0675	21.2646	14.4192	23.0274
Map1b	17.4253	26.4774	18.7006	12.0567	12.514	13.7831	20.9785	3.54329	6.3073
Sox11	10.5311	14.1243	7.97945	15.7815	14.1087	9.62479	19.822	0.597879	5.2071
Rpl13	26.0786	23.4202	18.2314	27.8217	25.7489	26.6937	19.3758	39.4453	43.0474
Rps24	24.7923	23.6198	16.9891	25.4571	22.8428	23.5609	18.7762	42.2328	33.7714
Gnas	23.2196	18.1023	22.7825	22.6005	18.6188	19.8457	18.565	12.1038	20.3288
Rpl15	19.8694	19.3066	14.8975	20.7846	18.9019	17.9097	18.5346	23.0899	24.4912
Eef2	16.1998	20.1989	14.5628	18.882	17.4587	15.2142	17.8766	9.68491	11.6615
Rplp0	19.3123	20.5835	16.2522	19.5401	20.7979	18.8077	17.599	34.9181	32.1041
Tpt1	19.2624	21.991	14.889	29.553	20.1329	21.6428	17.1404	36.466	30.7862
Eif1	18.9427	18.6009	15.3036	20.8626	15.3902	17.2877	17.1161	15.6164	17.2946
Stmn3	21.4279	20.887	22.3868	12.5947	16.3616	18.2134	16.5291	5.2315	4.27289
Rpl18a	16.505	18.1603	12.403	23.1424	21.2569	18.8144	16.4742	29.9918	27.268
Pcsk1n	34.1449	19.2625	21.1369	26.5105	42.7099	29.5141	16.3609	10.7885	4.58734
Rps29	20.7457	19.2864	17.2272	26.0423	26.3815	23.1878	16.0515	55.128	33.8564
Rpl6	21.2834	20.2753	14.9818	22.6355	23.1301	20.8277	15.9461	24.3417	24.1564
Rps7	20.3481	19.6617	14.6373	22.0467	22.0451	22.0219	15.8926	22.8871	25.2621
Rps5	19.205	18.8391	13.8976	23.2632	22.7688	22.3097	15.8237	22.8399	29.3041
Rps14	18.6564	19.012	11.8071	32.2351	23.3723	21.7291	15.8062	13.0439	28.3124
Rpl10	18.8251	21.4893	12.2295	20.4722	23.1615	17.6679	15.7713	14.0461	28.3398
Rpl37a	21.6699	18.7453	15.0007	28.6371	27.5795	26.1177	15.5697	26.5785	25.9726
Rps27a	22.4751	19.5795	15.1511	23.5577	24.7303	22.2148	15.3745	35.9987	32.7825
Rpl11	20.2019	17.7322	13.1542	20.8604	19.9343	18.9574	15.2803	24.1346	25.3289
Rps23	17.1245	17.7737	11.5282	21.3213	20.9043	18	15.2416	18.2475	27.6989
Rpl9	21.1017	18.7007	13.3725	21.6847	20.5122	21.5152	15.22	28.5318	27.6416
Rps8	20.3865	20.5012	14.7071	21.2519	20.2016	20.3675	15.2174	18.3277	30.3571
Rpl21	19.6021	18.816	14.4524	18.771	18.6444	19.381	14.979	29.97	24.9743
Prdx2	11.4296	14.822	11.8047	13.7685	11.8774	12.8304	14.8395	3.46769	8.88899
Sumo2	12.6146	14.5193	12.4373	14.9796	14.7657	13.9366	14.8244	5.40441	12.632
Mllt11	13.2387	15.6712	14.6929	9.54284	9.40706	10.7508	14.5041	2.29323	2.93402
Rpl32	23.8764	21.2954	13.8546	26.0645	23.0331	22.6156	14.3846	25.9452	31.7527
Rps27	18.1591	16.1523	12.1592	30.8682	29.3779	23.6504	14.2367	23.4858	27.682
Rps19	20.8038	18.0893	14.5666	24.7275	23.2686	20.661	14.2055	29.964	30.0169
Rps4x	18.973	19.4842	12.9698	21.7094	17.8202	18.6098	14.1386	36.4444	32.1411
Jpt1	11.2727	12.4937	11.6187	13.9388	9.75769	12.9919	14.0196	3.26363	6.64808
Calm2	23.8024	17.7741	22.2722	17.6284	21.5624	22.5219	14.0103	13.6355	8.64338
Rps11	17.2886	17.005	11.7475	19.6508	18.1035	16.177	14.0007	35.0659	26.5346
Fau	18.122	17.496	14.3277	21.6133	21.8297	20.1283	13.9609	50.7457	26.1439
Tubb2a	16.2478	12.5227	21.591	7.67007	12.4787	17.8847	13.9533	7.51482	3.9938
Rpl37	20.2901	16.7569	13.8275	22.8049	24.4906	22.248	13.9117	23.9996	20.1002
Rpl19	19.1918	17.0003	14.0906	19.4277	19.2287	19.4995	13.7085	28.4612	22.6167
Gap43	17.0006	21.6143	22.7049	8.12361	7.89045	13.5732	13.6698	4.43857	4.73924
Ptms	10.4124	12.488	13.3539	9.82546	9.90189	10.432	13.6692	4.57656	5.48641
Ybx1	14.6056	15.4678	15.5133	13.6804	12.3672	13.2528	13.6057	6.41618	14.1509
Rpl23	20.6738	18.8112	14.1442	20.2635	19.5559	20.0507	13.5126	31.286	28.3654
Rps9	14.2453	15.084	10.7494	18.3639	16.7738	14.1713	13.4181	27.8062	24.4196
Ywhae	13.4851	15.0769	13.4306	11.949	11.5499	13.383	13.4145	7.52406	9.01413
Rpl3	20.1866	16.4096	14.3379	19.2547	19.3262	18.0276	13.0959	24.5213	24.352
Rpl7	12.5418	14.6732	10.0754	15.0354	13.227	13.3868	13.0938	16.937	21.4003
Selenow	18.3084	17.8832	18.9454	13.1555	12.5967	11.894	13.0722	5.21501	11.1386
Rps15a	16.8362	16.5459	12.3179	20.553	16.7398	15.8732	12.9159	24.1855	27.5435
Gapdh	16.928	14.9771	16.3765	11.2004	10.4667	12.6855	12.8468	12.3546	18.0825
Rpl17	15.4043	16.8022	11.0692	19.0976	16.2915	15.5269	12.7505	9.35799	22.6951
Ttc3	14.3689	11.145	11.9483	10.8304	12.0012	13.0372	12.6897	4.74871	5.27131
Rps3	17.9688	16.7237	12.1806	19.1669	16.6356	16.6552	12.6544	24.5352	24.5639
mt-Nd2	17.4296	12.0925	15.9379	12.0792	14.9042	18.8411	12.4701	19.0473	12.4668
Rpl26	16.7792	17.0341	11.032	19.7665	17.5289	17.1627	12.4679	16.6153	22.777
Rpl8	18.1091	16.2841	12.1628	18.7403	16.1968	16.6768	12.4128	20.2033	25.7248
Rps2	22.5553	16.013	16.4881	18.5442	17.6454	19.454	12.4078	26.52	29.2492
Rpl39	17.6708	16.739	13.447	19.0799	19.201	17.8139	12.344	29.5283	25.5832
Rpsa	17.4354	13.6436	15.7676	13.6545	15.9619	18.0206	12.3419	29.4575	21.306
Eif4g2	7.59137	9.22073	8.16371	9.58999	7.3676	6.76484	12.2155	4.03767	5.8541
Hsp90aa1	9.39933	11.5733	10.2254	9.29365	8.27327	11.9884	12.1966	4.94483	5.71913
Rpl23a	11.2215	14.993	9.63001	16.9434	13.8725	12.1413	12.1172	3.72543	20.0276
Rpl38	19.0447	15.0924	13.5085	18.3321	18.3769	18.3098	12.0562	14.3255	17.3097
Hist3h2ba	4.19356	7.20652	5.23133	7.9431	4.71462	4.95819	12.0327	0.344701	1.73545
Hnrnpa1	9.47583	11.2936	7.9499	11.5947	10.51	9.68574	12.0237	2.98043	8.94502
Chchd2	14.8445	12.7968	13.078	16.0209	13.4166	13.661	11.924	8.24486	11.2315
Rpl14	16.3401	16.5935	10.9392	17.4881	17.3994	13.6786	11.9074	10.266	25.2877
Rps3a1	19.4926	16.7246	11.9359	18.1987	17.5034	17.3081	11.8871	32.9133	28.3512
6330403K07Rik	9.31917	8.47797	9.55511	10.5218	11.2229	12.9926	11.784	2.51928	2.7477
Rps18	18.4435	16.9138	11.3566	20.1562	17.3324	16.529	11.7372	18.6146	28.4464
Ly6h	19.0892	9.97885	18.2306	14.4612	17.2243	17.5828	11.6637	6.00673	2.55143
Ndn	14.2465	9.47803	9.6447	20.285	13.5598	24.2749	11.6211	3.88038	4.23481
Pebp1	11.0582	10.7648	11.1853	8.9026	8.7762	10.1093	11.472	3.95079	7.76955
Rpl24	15.2904	14.5699	10.4165	18.275	17.6716	17.3114	11.4227	15.8967	19.2993
Rps6	13.927	15.9472	9.77738	16.6457	14.9801	12.619	11.3507	7.65585	19.7459
Tsc22d1	4.87351	6.23944	7.30215	6.67995	4.43633	6.81608	11.3443	1.45349	4.7934
Rps13	14.4898	13.2034	10.9626	17.5488	15.4061	15.9098	11.3207	16.3703	20.5175
Pgrmc1	8.91304	7.9685	7.66885	9.70653	28.0761	10.6712	11.3181	2.91661	4.32871
Celf4	5.19201	5.15542	8.62061	5.41784	5.88785	6.99548	11.2259	2.33785	1.10273
Ncam1	10.4913	9.8149	10.0314	7.52262	11.1125	10.0081	11.2065	3.57968	3.65976
Rplp2	14.5588	13.0641	10.2682	18.0017	16.6784	14.9242	11.1072	12.4596	20.2922
Uchl1	12.7891	13.815	13.7666	9.71818	9.89885	13.9009	11.099	3.66526	2.67418
Ywhaq	10.4346	12.8025	10.5888	8.77266	7.66361	9.89022	11.0656	3.50347	6.6794
Rpl4	12.8046	13.5318	9.11911	16.3532	15.5086	13.2165	11.0627	8.3246	17.5026
Calm1	15.8497	13.4457	16.5556	9.37346	10.1747	12.7272	11.0595	8.36372	10.2243
Rpl27a	15.8112	13.591	11.525	16.7867	17.5677	16.1986	11.0552	30.9907	20.0705
Rps16	15.2178	13.814	10.8163	18.0063	17.0237	16.0028	11.0187	20.9176	23.3407
Pitx2	0.0469261	0.176767	1.8303	0.0679682	0.0749183	0.0524174	11.0044	0.0272939	0.15205
Rpl35a	15.5085	12.6278	10.0914	21.4689	19.6805	18.497	10.936	31.3084	19.8182
Ddx5	6.89926	8.18057	6.93722	9.55746	7.81422	7.70065	10.8453	8.757	6.38094
Bex2	18.1905	11.0867	12.1875	19.48	17.9695	15.7814	10.7879	5.39516	3.00354
Nsg1	7.69494	7.83832	10.8419	5.86982	6.45869	8.57554	10.4105	2.15041	2.1736
Hnrnpk	7.06197	8.59172	6.8466	14.0929	10.1951	10.2777	10.3852	5.58688	7.46258
Rpl36	15.7554	12.7232	11.0586	18.4859	16.9041	16.8657	10.3767	16.7923	16.1964
Fth1	13.1358	11.599	14.209	12.4211	12.0367	10.5426	10.2601	40.6347	22.9385
Slc25a4	13.8203	13.5041	13.806	9.86304	10.7639	12.0819	10.1011	5.0771	11.9306
Oaz1	10.0144	9.24683	9.03674	11.8444	10.1131	9.66878	10.0952	12.1761	11.2953
Marcks	7.40457	7.67879	8.22539	7.26121	7.50804	9.18342	10.0892	15.5133	10.2385
Cox4i1	10.4312	13.2412	10.0974	12.1076	10.959	10.3294	10.0209	7.32281	12.1383
Rps28	14.4796	12.1677	10.0132	21.3034	20.5065	17.6294	9.96062	17.5891	17.1633
Atpif1	12.6227	12.3356	10.1254	11.9546	11.1756	12.5421	9.94364	5.0852	7.75081
Rpl34	14.0572	13.0235	9.4093	17.6125	16.3119	15.1632	9.85115	18.3818	17.7907
Dynll1	8.71214	11.1559	10.0247	10.8662	6.45885	8.09558	9.78051	3.51291	10.7484
Rpl29	14.9766	14.2436	11.0081	16.1428	13.8004	13.5657	9.63416	16.2312	16.7195
Snrpn	10.5443	9.22233	12.5586	6.65675	8.38501	7.08576	9.63116	2.82546	2.29447
Dpysl2	10.1203	8.61104	10.5952	7.14033	9.44076	7.64105	9.54751	3.84763	3.72407
Celf2	2.9541	2.2149	3.0799	2.41825	1.69833	2.36375	9.46759	1.98277	1.85398
Gnb1	10.2867	8.53862	9.1412	9.1541	10.2003	9.70084	9.39392	4.38586	5.19906
Mapt	8.67386	9.03534	12.0464	3.62437	6.03398	7.77944	9.36972	2.12252	2.22802
Hmgn1	5.74897	6.95127	5.24829	11.0177	7.35405	7.71033	9.27917	2.9332	10.8782
Eif4a1	9.53319	10.9543	7.19932	9.10368	7.46549	7.822	9.21674	6.66518	7.99557
Rps17	11.8739	11.9775	8.15364	14.9359	12.3007	10.7402	9.18143	4.59108	16.6552
Ptov1	8.4017	7.98249	5.67998	10.4725	7.94924	8.86745	9.10725	2.93336	6.04135
Gm1673	9.94053	9.49577	11.2447	10.122	10.9819	11.2903	9.1068	2.73032	3.63982
Rpl18	12.1454	11.2537	8.74371	12.8435	12.8265	12.2069	9.09247	16.9125	16.1964
H2afz	8.80211	8.80324	7.6885	10.1757	10.1215	12.94	9.05556	6.72213	18.8581
Rps15	10.3602	11.8225	7.79181	15.5723	12.1255	10.7547	8.99165	4.12962	17.0494
Gnb2	9.88228	9.20503	8.66788	10.1902	8.99043	9.47345	8.98196	6.88781	6.90804
Rps10	13.9061	12.445	9.60956	14.1644	12.3643	12.9425	8.96085	27.4529	19.5722
Maged1	5.72617	4.80291	5.82677	8.88485	7.64156	7.18507	8.88907	2.32183	3.11054
Rpl35	12.5258	11.2849	9.32925	13.9968	13.6159	13.166	8.88325	15.0295	14.4801
Rplp1	13.7972	12.626	10.694	13.1671	11.6477	11.7232	8.82953	24.7735	26.1698
Rpl31	11.7113	11.5679	8.48034	15.5232	11.5177	11.0049	8.79005	4.92193	15.5759
Hmgb1	6.19369	7.32272	7.82965	9.20375	7.97385	9.1004	8.77629	4.46834	13.255
Rps26	12.6626	11.4247	8.69665	13.7629	13.7777	11.9416	8.76213	9.4942	14.5047
Ina	7.30129	19.8103	8.44905	5.06288	5.38382	5.38321	8.67883	0.808155	3.01272
Cox8a	11.6871	9.91851	11.019	10.3355	10.7269	10.8355	8.67181	6.89307	9.14947
Cox7c	10.6035	9.73521	8.8265	11.7193	12.6303	12.7507	8.66851	5.7147	7.38653
Rpl28	9.94864	10.0512	8.36255	12.0131	9.02155	10.1447	8.64753	14.2414	17.694
Pfn2	10.1483	11.2386	11.0231	7.39773	5.90344	6.63534	8.6459	2.08419	3.2763
Fxyd6	12.0931	7.1374	10.5815	7.66411	9.38211	12.0279	8.63245	3.69318	3.52365
Bex3	14.0741	11.1373	11.1106	13.9724	12.2035	12.7246	8.60123	4.18326	6.82
Rpl7a	9.21451	9.83277	7.19948	10.4866	9.26481	9.16651	8.55234	10.851	11.8354
Eef1g	10.7923	11.3424	7.52493	12.493	8.89643	8.84547	8.50449	3.87048	11.4171
Naca	10.3497	9.94179	7.81005	11.2057	10.344	10.7912	8.46532	9.34086	13.132
Cnih2	5.42822	7.58809	8.98875	7.14461	6.81814	6.90066	8.38716	1.34556	1.84388
Barhl1	0.025192	0.07881	0.0803492	0.032477	0.0211331	0.0324757	8.32362	0.011011	0.0522405
Fabp5	13.2059	11.2269	10.8069	5.5478	6.29918	10.1196	8.31784	4.11446	12.9527
Pkm	6.20461	8.00959	5.46926	6.37026	4.65126	5.44967	8.19118	4.75669	6.04635
Rnf187	6.86583	7.85487	7.74593	5.70601	5.28343	6.76329	8.15286	2.62072	3.99523
Atxn7l3b	6.15377	6.31379	6.57469	7.20905	7.03792	7.38119	8.14798	2.26881	3.72163
Hmgb3	6.20755	5.59277	5.6439	6.358	5.79901	6.30281	8.02562	0.667381	4.15919
Nme1	8.83161	8.49693	7.74339	7.82162	6.54543	9.34267	8.0092	2.70277	4.77715
Dnaja1	6.59562	6.95354	6.7676	7.65488	5.96342	7.13101	7.98059	3.1419	4.09032
Dpysl3	5.70863	7.75398	7.23187	3.34928	4.5517	5.71257	7.95114	1.01119	1.917
Cox6b1	9.01874	9.59007	8.91638	9.21595	8.70264	8.20193	7.87628	4.64625	7.40448
Fscn1	4.9103	6.24602	4.11443	4.5588	3.54674	3.70964	7.84744	2.76107	4.22498
Rpl10a	11.6241	10.273	7.56737	10.8293	9.3901	10.0685	7.84484	18.6071	17.7761
Btf3	8.82372	8.14753	6.7801	9.29608	8.66034	9.18101	7.78694	6.48397	11.4442
Rps20	11.3087	10.0095	8.60225	11.2927	9.8737	11.0026	7.75647	28.8948	22.6243
Elob	10.3821	9.38836	10.092	10.5029	10.2982	10.4144	7.71744	4.50898	8.15114
Atp5b	7.55132	9.2201	7.82086	6.81719	6.44878	6.69633	7.63688	4.48259	7.84754
Ywhah	9.18774	8.02643	9.35141	6.06644	6.19227	7.07942	7.63058	4.84661	3.82596
Gng3	9.0076	8.9107	9.53614	6.3714	7.05425	7.88443	7.60298	2.32356	1.94006
Chgb	1.79689	1.14759	3.17081	1.22499	3.59442	2.32852	7.58546	0.725692	0.487156
Rps25	9.90698	9.0747	7.21796	12.5867	11.0802	9.91364	7.45542	6.723	13.2213
Gsk3b	6.20826	6.13196	6.24425	5.65103	5.88107	6.08893	7.43043	2.79288	2.70721
Aplp1	4.98657	5.47017	6.74754	4.9007	5.20641	5.14109	7.40654	1.23597	1.19697
Crmp1	5.78416	7.5486	6.4203	4.12055	4.27388	5.12004	7.40418	1.02475	1.92444
Hnrnpa2b1	5.2757	7.15652	5.45906	6.67518	5.87321	5.74099	7.37851	3.20377	5.80843
Stmn4	5.38956	6.8144	6.5439	5.64166	4.74634	8.15385	7.36149	1.17494	1.06163
Hint1	11.5994	8.8221	11.2217	8.76614	9.89618	10.9006	7.34045	6.5947	7.59592
Calm3	9.76809	9.67422	10.5162	5.42041	6.57778	6.63456	7.33681	3.94154	5.47824
Ndufa4	10.2322	8.98863	11.4676	7.35758	9.11894	10.599	7.24688	5.55569	7.07158
Cirbp	5.66403	4.67359	6.86554	7.52581	7.02944	7.70162	7.20013	2.27932	1.98875
Morf4l1	7.36909	7.53113	6.47854	7.7861	7.92714	7.89269	7.18973	3.972	5.33204
Foxa1	0.033509	0.0882707	1.91365	0.0414705	0.0473442	0.0552348	7.17589	0.0259379	0.0776281
Rpl30	10.342	8.04481	7.57261	10.6094	10.8124	11.5884	7.16371	25.2641	12.1036
Nap1l5	10.7157	5.09863	8.30096	8.9499	8.14779	7.99417	7.12916	4.85878	1.59965
Npm1	8.93545	7.46972	6.64903	8.94926	8.5879	8.6203	7.12282	7.85139	14.4252
Zcchc12	3.26119	2.5	5.39743	2.91458	4.75099	5.99933	7.09965	1.23669	0.688835
Cox6c	8.51416	8.14664	9.3778	7.41699	8.18664	8.06161	7.01036	4.92294	7.82546
Igfbpl1	1.35247	3.38277	0.945939	0.96081	1.73148	1.22569	7.01025	0.0433421	0.802933
Tecr	6.86547	6.78157	7.03984	5.70766	6.12634	7.36818	6.99093	2.89967	4.09063
Atp5e	9.13214	7.2502	9.51798	9.34999	8.64002	8.96319	6.81725	6.93271	7.59945
Srsf3	5.88379	6.25459	5.52346	7.01473	5.95833	6.01104	6.77497	3.66894	6.65478
Xist	6.90675	6.48218	6.95417	10.732	14.2018	10.3955	6.70706	8.38249	7.58918
Atp6v1g1	6.36527	6.69365	5.34001	6.05932	6.54944	6.0877	6.61752	4.2546	3.95861
Ran	6.84682	6.57849	5.36263	5.23444	4.90854	5.31024	6.59858	3.7551	9.26339
Rps21	10.8213	7.90853	7.7453	11.4282	12.1953	11.62	6.51304	17.5643	11.4541
Sub1	8.74873	7.68628	5.4521	10.5169	8.3189	8.99754	6.50006	4.16375	6.23347
Eif5a	8.63873	8.41429	6.60118	6.42122	5.43284	5.97338	6.45853	5.56681	8.72526
Syt4	5.02602	1.85808	4.52628	1.38668	1.88668	3.46578	6.4048	2.14422	0.907712
Gabarap	5.41211	7.66962	6.4124	5.59049	6.30985	5.22849	6.3807	6.45718	8.09297
Mtch1	8.0978	6.76059	6.36597	5.4441	5.28304	6.61871	6.36892	4.33726	4.9518
Elavl3	5.25124	6.31393	5.80392	5.6425	5.10136	5.08398	6.33516	1.09603	1.50238
Tuba1b	7.71158	8.63619	9.13632	4.26115	4.54667	5.11378	6.27105	5.33345	12.3756
Tagln3	4.63324	7.56515	4.73555	6.28234	4.12248	4.79	6.25631	0.873943	1.51681
Eif4a2	5.77228	5.3604	5.46381	6.58144	7.79455	5.77579	6.2314	2.13014	3.21285
Rps12	9.55835	8.55609	6.34811	9.70636	8.69746	8.28041	6.21369	20.2465	17.5335
Cdc42	6.52469	6.97873	6.70894	5.46981	5.60645	6.44419	6.13945	8.01226	6.34097
Cox7a2	7.67834	7.57844	7.29815	7.584	7.39879	8.24798	6.13687	3.40718	4.83326
Cox5a	6.61797	8.85673	9.29532	4.28485	4.37488	5.24699	6.12535	3.70489	4.61079
Atp5f1	6.09958	7.08803	6.16443	5.6122	5.37857	6.97901	6.07801	4.10915	5.07019
Myl6	6.75523	8.39274	6.45759	6.2907	5.9642	5.72473	6.04864	5.21278	9.19234
Tspan13	3.38014	8.73332	5.20006	2.76178	3.33226	3.29481	6.04801	1.33824	1.464
Cpe	4.80657	5.15983	5.93315	4.2421	4.32492	5.0172	6.01612	1.84381	3.27075
Atp5a1	5.06603	6.40704	5.87362	5.09924	5.04801	5.07575	6.01259	3.38422	5.51724
Pfdn5	6.44262	5.85657	6.1553	7.80514	8.45978	8.13753	5.95741	7.4256	6.57201
Selenok	6.86534	6.24766	5.30519	6.20563	6.08949	6.0937	5.94212	4.32958	4.34249
Hsbp1	6.78449	5.86145	7.37863	5.65613	5.2573	6.41555	5.89513	3.9175	3.74371
Psma7	6.10671	6.29235	4.91139	6.42572	5.76581	5.98344	5.86182	2.51692	4.67537
Ubc	4.77818	3.88473	4.52096	5.21874	5.45452	6.47613	5.85813	16.3667	5.08025
Atp5h	6.40553	6.92475	6.3855	6.36447	5.92012	6.29999	5.85191	4.24719	6.66968
Atp5l	7.48567	6.74926	7.2596	8.05359	7.82573	7.43183	5.82409	4.63757	5.60108
Zwint	6.89631	5.65056	7.29873	5.3983	5.91683	6.4789	5.81087	2.82913	2.96818
Rtn3	5.1459	6.39133	6.04295	4.25913	3.97417	4.42701	5.78803	2.66729	2.83393
Rack1	6.25886	6.56559	4.79089	6.76981	6.11175	6.26928	5.77476	7.20763	8.87955
Jund	7.87034	5.73846	6.32551	8.67492	8.47233	8.31639	5.77058	6.75308	4.14009
Sec61g	7.32826	6.1834	5.47609	7.54839	8.29467	7.3531	5.73692	3.89736	7.86889
Evl	4.53044	5.55947	5.76709	3.59855	3.9633	4.68468	5.70067	2.25168	2.14537
Eif3f	5.72961	6.39561	4.57042	8.05133	7.04557	6.30616	5.64187	5.82445	6.55538
Gabarapl2	5.32915	5.12113	5.17883	5.72329	5.83265	5.41583	5.62061	3.19385	2.30008
Mif	10.0667	9.1396	7.74282	6.46336	6.16237	6.42237	5.60782	3.15331	6.82297
Snhg11	12.9975	9.63634	14.8234	4.7719	16.9863	13.146	5.58963	9.50216	2.74527
Ddah2	2.13064	6.62485	3.32123	3.26107	2.18817	2.1001	5.50943	0.886819	4.05382
Ckb	4.25439	8.20063	6.75118	3.06421	2.4042	4.66966	5.46209	17.9222	8.11364
Rpl27	6.61914	5.70905	4.86757	9.67627	8.72892	7.68096	5.46111	4.82943	6.45116
Paip2	4.08252	5.28233	3.96383	4.38005	4.90357	4.32727	5.45156	2.12907	2.64801
Hdac2	3.07713	4.18904	2.8953	3.59703	3.06585	3.48154	5.44646	0.67871	2.25798
Cox5b	7.30525	6.51955	7.22728	6.45525	6.66048	6.94371	5.43503	4.12066	5.21995
Slc25a3	5.895	5.81869	5.6914	5.11515	4.82506	5.5356	5.41287	6.72608	6.67578
Atp5j2	7.87801	6.69648	6.99476	7.65422	7.33489	7.57131	5.41275	4.63304	5.67793
Uqcrh	5.59291	5.87652	5.67818	6.7521	6.8731	5.69953	5.39906	4.31601	6.49792
Tma7	6.88569	6.09786	6.09006	7.10778	5.99403	6.63826	5.33694	3.18902	5.4486
Thra	5.08854	3.14119	6.59224	3.79339	4.55708	5.08529	5.31055	1.34635	1.64418
Serf1	4.5148	5.98346	4.53171	3.86248	5.1805	4.71812	5.30423	0.820951	2.31357
Nsg2	3.42355	3.75485	6.0057	2.77077	2.69615	3.90653	5.27624	1.52077	0.986621
Atp5j	6.55331	5.91657	6.48545	6.54754	6.35099	6.94344	5.27028	3.63601	6.16906
Dbn1	3.11447	3.65234	3.45948	4.06077	3.38816	4.35474	5.2677	0.850573	1.75008
Dynlrb1	5.70367	5.8388	5.45258	6.2129	4.91831	5.02278	5.23216	1.85385	3.7603
Ap2m1	5.57288	6.72568	5.84878	4.61726	4.1077	4.5579	5.22604	2.76691	4.48818
Ctbp1	4.49173	4.95673	3.92529	5.12799	4.06953	3.60207	5.17801	1.68365	3.1202
Map1lc3a	7.25615	7.29523	8.31952	5.5908	5.44892	6.20605	5.12387	3.19018	3.57908
Atp5g1	7.19514	5.61201	8.15021	5.20688	4.84603	6.51765	5.11994	4.29127	4.52104
Prmt1	3.90288	4.85256	3.74388	4.35873	4.13541	5.10735	5.1091	1.53933	2.95409
Eif3h	4.62154	5.25256	4.06728	5.35816	5.88874	6.16385	5.09165	4.04487	5.32904
Tceal9	4.86638	3.9388	2.98689	9.16373	6.32219	6.46472	5.08921	1.48916	5.272
Ywhab	5.41208	5.31469	5.82043	4.1463	4.64427	4.85393	5.07901	3.03221	3.63536
Sbk1	2.29633	3.31286	3.22937	3.33625	2.83773	2.60473	5.07858	0.258832	0.819995
Srsf2	4.06924	4.13119	3.63264	4.75476	4.10574	3.84022	5.06652	4.78801	5.07276
Rab3a	6.18891	4.68525	6.81185	3.84244	4.32322	5.69785	5.05114	1.89078	1.12327
Rpl5	5.27696	5.96534	4.38799	5.72507	4.82536	4.60813	5.04503	4.58439	7.31973
Klc1	4.89871	6.52016	4.64911	3.33838	3.78	3.94307	5.00466	1.36572	1.73857
Set	5.03526	4.52539	4.13509	4.66816	4.48828	4.40489	5.00062	2.80441	4.81599
Gpx4	5.59717	6.40418	5.91647	4.95203	4.99176	4.21197	4.99874	4.32874	5.60538
Fez1	3.5604	3.23095	3.59624	3.62738	3.43876	4.08784	4.99665	0.638319	1.57074
Serf2	4.1714	6.18276	4.11579	4.48422	2.91644	2.54005	4.99601	6.74812	12.2867
Arf5	6.04191	5.25112	6.15677	4.99173	4.76063	5.10684	4.98765	3.65634	6.34024
Rpl36a	6.78632	6.59965	5.81928	6.18213	7.47346	5.87624	4.9839	7.88532	11.2772
Map1lc3b	3.41449	4.8669	4.22274	3.39125	3.52403	3.34404	4.9359	2.651	2.59258
Eef1b2	7.18637	6.35753	5.00637	6.50985	5.5823	5.99668	4.92947	8.41047	8.16085
Morf4l2	6.09998	4.52809	3.83202	6.38999	5.23342	5.14973	4.8642	1.66566	4.00208
Dnajb6	4.1012	3.98187	4.63645	4.61695	4.6069	5.37521	4.85314	1.79773	1.84059
Ywhag	5.32311	5.63031	6.0814	3.61344	3.8148	4.29806	4.8531	2.36573	2.09265
Clta	5.75959	4.91327	5.27165	5.78769	5.81393	6.85205	4.83795	14.8606	6.64634
Cdk4	3.49552	3.88538	2.14318	6.01678	3.36292	3.11164	4.83426	1.52018	6.91731
Rbm39	3.73169	4.03451	3.58341	6.1958	5.28025	4.59042	4.82728	3.44842	4.5891
Rpl22l1	10.5955	6.21949	7.4582	8.64108	7.26007	8.16602	4.79622	6.31452	9.65598
Rab2a	4.1092	4.2516	4.6522	3.81108	3.77232	4.54238	4.77935	2.09072	2.70758
Rtn4	3.96423	4.23426	5.05256	2.83306	2.84977	3.74309	4.76126	3.5329	3.48058
Fkbp1a	6.69089	6.49899	5.16505	4.9426	4.30958	4.17114	4.75872	1.97126	5.06716
Rbx1	4.94229	5.09549	4.24401	5.756	4.63924	4.53809	4.72726	2.84777	4.40898
Cbx3	3.87661	3.54487	3.2841	4.90771	4.90352	4.63401	4.70833	2.29243	3.08022
Nrep	1.0895	2.76045	2.44383	2.09438	2.7668	2.16763	4.70218	0.182079	3.39635
Hnrnpdl	3.3254	3.46526	3.22668	3.72409	3.1037	3.08793	4.67956	1.83479	3.23079
Pafah1b3	4.86753	5.97018	4.9854	4.42652	4.47912	4.60798	4.66691	1.32996	2.32758
Ube2d2a	3.83399	4.53459	3.98163	4.0805	3.31187	3.38046	4.65863	2.39147	3.41039
Usmg5	6.9721	5.39853	6.52374	7.57821	6.89191	7.12625	4.63298	2.34832	3.50243
Podxl2	3.83659	3.1987	6.02158	3.3196	4.23519	5.43039	4.61832	1.62322	1.28431
Tspan3	3.68907	4.08492	4.11705	4.36727	3.56744	4.01187	4.61757	2.34303	3.60331
Gpm6a	3.07948	2.92131	5.07949	1.8477	3.20657	3.52843	4.6076	1.38993	1.20007
Zfhx3	1.58189	1.99895	1.08844	2.42285	4.08743	3.5647	4.58538	3.00383	1.1039
Rbm3	5.20922	4.69134	4.79779	3.7595	3.95481	4.35846	4.58397	6.73461	7.27495
Mrfap1	5.55571	3.98538	4.35249	6.2992	5.27986	5.88998	4.56912	4.45894	6.0581
Gdi1	3.84236	5.26324	3.93817	3.804	3.68325	3.3846	4.55252	1.0112	1.58898
Aes	4.3717	2.85538	4.97992	3.04337	3.9182	4.98934	4.54813	2.48814	3.05385
Cox6a1	5.68066	6.59202	5.29609	5.60068	4.83864	4.24028	4.54498	1.93611	4.2682
Bsg	5.96535	4.80866	5.69077	4.59073	5.00459	5.54843	4.52492	5.15629	6.3849
Pfn1	7.38143	7.11287	4.46317	6.25343	4.58562	4.17622	4.52106	12.0755	14.3351
Serbp1	4.48218	4.94275	4.83506	4.11074	4.0243	4.26228	4.51557	2.88045	5.20628
Rpl12	7.83754	6.26206	5.32901	6.62153	5.84763	6.86343	4.51048	10.9269	12.0566
Ube2s	3.6408	4.31792	4.01627	4.87053	3.5117	3.7385	4.50785	1.80809	5.33066
Eid1	5.56454	4.37061	5.9981	3.81707	5.54196	6.57244	4.50685	2.2115	2.89368
Cox7a2l	3.84404	4.91637	3.69529	5.13523	5.40163	4.7388	4.50427	3.02781	3.94013
Matr3	3.49476	2.97974	3.88264	3.64393	4.4138	4.31419	4.49619	1.81966	1.83726
H2afy2	2.38078	3.22767	3.15314	3.03557	2.93139	3.41335	4.47771	0.322657	2.60047
Sumo1	4.38124	4.36653	3.63406	5.76839	4.71985	4.70521	4.46042	2.08612	3.51563
Snrpe	3.80458	4.22172	3.65374	4.50896	4.61178	4.33865	4.44423	2.65317	4.65404
Rab11b	2.97043	3.43628	3.33032	3.74928	2.95307	3.72265	4.44352	1.43163	2.14482
Nedd8	4.84419	4.85063	5.32791	4.15318	3.47797	4.1516	4.43764	3.45333	4.72577
Tmeff1	2.88759	4.1277	3.60365	2.15582	1.84567	2.4345	4.42722	0.488465	1.23163
Psma3	4.2699	4.36027	4.25395	3.82201	3.67227	4.13977	4.42667	3.03974	3.73639
Camk2n1	1.28999	2.1102	4.7445	2.69238	1.4226	1.85891	4.39049	1.09565	1.14189
Atp5c1	5.08424	4.53443	5.27762	4.43874	4.79334	5.47707	4.38844	4.04711	4.51593
Psmb6	4.27157	4.59064	4.1372	4.77165	4.16775	4.55406	4.38529	2.51278	4.2721
Swi5	5.05947	5.10725	4.85278	4.93034	4.15634	4.65695	4.38431	2.47154	4.83185
Lsamp	1.50332	1.31184	1.57045	0.787777	2.3372	1.79141	4.37009	0.892714	0.724427
Rsrp1	3.39335	3.47216	3.09597	5.58386	5.15614	4.32819	4.35245	5.69243	3.33743
App	3.59116	3.18343	5.0271	1.85821	7.28209	3.26709	4.33017	2.14296	2.78269
Pcbp2	3.71567	4.61755	2.65197	5.27126	4.10673	3.39201	4.32821	2.00517	5.03238
Atp5g3	5.71965	5.67959	7.18459	4.41153	4.79704	5.06243	4.30929	2.66893	4.02326
Dcx	1.97464	3.84792	3.46669	2.28351	2.71857	2.51518	4.29413	0.368778	0.926727
Tnrc6c	1.64118	1.47546	1.24073	1.91087	2.22533	2.20109	4.28471	0.703433	1.05416
Pcbp4	3.38207	4.20461	2.52222	3.15006	2.89538	2.49535	4.28327	0.52941	1.95092
C1ql1	0.0555607	0.692095	6.10599	0.0343278	0.0607487	0.0358512	4.2546	0.0269272	0.154734
Psip1	2.8234	3.37406	3.60285	2.76582	3.20791	3.05701	4.24848	1.04091	2.37454
Atp6v0b	5.22689	4.08882	5.39981	4.38545	5.27538	5.71946	4.23016	6.05738	2.43627
Rufy3	4.03297	4.5939	3.53595	3.46995	3.94289	3.82993	4.22319	1.24741	1.00625
Nono	2.69408	3.48127	2.43638	3.92083	3.13587	3.22626	4.21488	1.44458	2.96134
Arpc5	3.77926	3.95335	2.6509	2.8451	2.70095	2.73927	4.20183	2.90526	2.43395
Resp18	6.8062	3.64253	4.65492	4.84803	5.94252	5.44444	4.18737	2.81695	0.865941
Eif1b	4.32224	4.11631	3.77648	4.69492	4.62418	4.78638	4.18646	2.48762	2.73061
Atp5g2	5.81357	5.95881	3.87307	6.65314	6.57088	6.0314	4.18372	7.22511	8.00566
2010107E04Rik	5.03269	4.95297	5.06315	4.60271	4.64004	4.65305	4.17302	2.96713	3.79365
Hbb-y	5.07379	10.7151	3.67011	3.89192	1.71987	1.32622	4.13441	0.864843	10.5091
Hnrnpa3	3.09659	3.30324	2.66279	3.87166	3.5229	2.90926	4.13372	1.9359	4.40655
Pbx1	2.05995	2.90262	4.28675	2.32628	2.00538	3.18507	4.11613	0.643127	1.51328
Nr4a2	0.176848	3.31637	7.2696	0.131256	0.356957	0.293971	4.10324	0.210615	0.547118
Dstn	4.21549	4.83272	4.2632	3.84505	2.97579	3.31353	4.10165	1.53804	2.78027
Khdrbs1	2.06163	2.75518	2.22827	2.49397	2.16807	1.97296	4.09829	1.18011	2.16879
Atp1b1	5.71197	4.15977	6.34453	3.03647	3.67663	4.6614	4.09829	3.01702	0.846855
Hist3h2a	0.977291	2.11235	1.43282	1.82018	0.782455	0.727917	4.08918	0.37499	0.697651
Vapa	4.7084	4.08801	4.58659	3.65031	4.20686	4.76441	4.07065	3.55378	2.7483
Vdac3	4.27663	4.20544	4.12878	3.34852	3.8473	4.87895	4.06876	2.09043	2.65822
Arf4	3.36344	3.96383	2.95762	3.58661	2.94131	3.19563	4.03968	1.98209	3.62364
Kif5c	3.67619	3.99597	4.13128	4.02104	2.80217	3.84269	4.03921	0.945284	1.06089
Ubl5	5.18427	4.48866	4.83998	5.06642	5.27342	4.81897	4.02427	3.73783	3.96009
Arf1	3.7371	4.30421	4.13565	3.77315	3.49334	4.3645	4.01386	3.98073	3.78821
Ube2e3	3.26803	5.7469	3.60777	3.84121	3.13472	3.73947	4.00606	1.60314	2.82089
Hnrnpab	3.25508	3.87582	2.5263	3.53641	3.07587	3.14502	3.9999	1.56087	3.46073
Ywhaz	5.19927	4.31236	4.48218	3.90853	3.79609	4.21998	3.9554	2.59116	2.42808
Psmb1	4.14946	4.66711	3.76356	3.57386	3.56088	3.93417	3.91915	2.96547	3.74026
Foxp2	0.327543	0.105935	0.551157	0.112563	0.157646	0.0499764	3.91653	0.0424388	0.734596
Atat1	1.43647	2.64357	2.73814	1.89136	1.36931	1.63024	3.91217	0.398871	0.807118
Pcbp1	3.57427	4.13443	2.57285	3.82021	3.07541	3.21512	3.90957	2.8439	4.9566
Ndufa7	4.91248	4.45411	3.99529	5.43456	5.19181	4.89824	3.90444	2.68297	3.91573
C130021I20Rik	0.01833	0.0539825	1.17228	0.00860181	0.0337291	0.043374	3.89657	0.0191344	0.0668097
Cct5	3.40002	3.83289	3.12803	3.37645	3.20799	3.53687	3.87746	1.59021	2.89164
Uqcrq	5.18957	4.53932	5.55368	4.43913	3.77113	4.01755	3.8756	3.35796	3.57747
Arpc1a	3.98333	4.0831	3.29494	3.9318	4.09445	4.2787	3.86453	2.10989	2.79389
H2afv	1.48236	2.32596	1.52329	3.96039	2.65788	2.11404	3.85434	1.05501	6.72605
Sem1	4.63163	3.75688	3.87286	5.60666	5.01484	4.38126	3.85115	3.35819	5.54624
Ube2d3	4.25816	4.28062	3.50355	4.81778	3.81468	3.45321	3.8387	3.86909	4.31947
Rab3c	0.824038	1.58387	2.4393	0.702668	0.955447	1.09694	3.80436	0.362261	0.319501
Gng2	3.39443	3.32454	4.17266	2.25229	2.65647	3.02186	3.78757	1.51238	1.64215
Cacna2d1	1.44104	0.732413	2.34168	0.56891	1.66589	0.22471	3.78433	0.675597	0.506008
Cox7b	4.47557	4.3592	5.42909	4.01136	4.22965	4.13662	3.78349	2.18962	2.70584
Ubqln2	1.88236	1.86679	1.77761	2.4785	2.22228	2.14144	3.77366	0.670869	0.893515
Cyth2	1.62957	2.56638	1.97832	2.70114	1.64789	1.91814	3.76919	0.711189	1.10534
Scg2	3.10386	1.79573	3.61484	2.45956	7.84255	5.75119	3.76727	2.36983	0.340101
Vdac1	4.14773	4.43164	5.25016	2.55247	2.31431	2.96179	3.76261	2.24316	3.73939
Elavl2	0.760236	1.76059	4.02819	0.958821	1.19383	1.05631	3.75249	0.300137	0.392186
Uqcrb	4.87609	4.3614	4.86621	5.35013	4.88633	5.55726	3.75199	3.18902	4.30996
Pou3f4	0.0203473	0.504241	0.261001	0.0203538	0.0910661	0.130361	3.75172	0.00639263	0.109168
Ank3	2.43481	2.89974	2.90116	2.33518	3.41046	3.39416	3.74788	1.12291	0.934498
Arl6ip1	3.06231	3.29083	4.5225	2.46074	3.04578	4.03755	3.7388	3.31152	3.4452
Sfpq	2.52862	2.72748	2.86617	2.99544	2.82662	2.78248	3.71733	2.42843	2.2672
Rpl22	3.85633	4.08011	3.19686	4.58927	4.00663	3.90975	3.70181	10.6912	7.95751
Atp5k	4.93201	4.43742	5.20773	5.07223	5.10988	4.7821	3.69659	2.08019	3.79325
Mlf2	3.44625	4.35903	3.6299	3.86169	3.22178	3.16455	3.69635	1.32229	3.28717
Bri3	4.04066	3.73342	2.58733	4.61989	4.18916	3.98749	3.6798	3.34781	3.09927
Polr2m	3.16313	2.95592	3.40495	3.31801	2.94719	3.41449	3.67808	1.24107	2.92833
Atxn10	3.30413	3.79077	3.61012	2.88169	3.51812	3.7185	3.67488	1.98278	2.7809
Fis1	3.33497	3.71287	3.50396	3.76608	3.12825	3.55545	3.66619	2.76275	2.68128
Cct7	3.47042	3.68805	3.18066	3.85136	3.08617	3.98498	3.66271	1.6001	2.30953
Rtl8a	3.68444	3.55283	3.32478	4.13538	4.32286	4.10992	3.6535	0.924087	1.43083
1110004F10Rik	3.73779	3.458	3.403	3.91549	4.07287	4.49526	3.64615	1.28275	2.49257
Elavl4	4.8513	7.93291	3.18414	3.48255	3.04219	2.78715	3.64502	1.17796	1.12675
Ndufb9	4.19932	4.31656	4.13341	3.85005	4.06958	4.30246	3.63583	2.0532	3.67276
Irx5	0.0358857	0.805574	0.2423	0.023533	0.114398	0.0317746	3.63531	0	0.514858
Bex1	5.88177	3.55345	4.75544	5.01639	5.08923	5.31973	3.63064	1.4751	1.629
Prkar1a	2.80949	2.7496	2.65993	3.76391	2.87235	3.28727	3.62828	1.9313	1.83315
Vcp	3.00029	2.88185	2.73813	2.64591	2.50784	2.73717	3.62752	2.04175	3.18287
Ap2s1	3.67935	3.71438	4.07648	3.76879	3.12719	3.44725	3.62729	1.97969	3.06792
Rab6a	4.65571	4.84186	4.88951	3.43196	3.38452	2.78965	3.575	1.33862	2.27549
Ctxn1	3.14143	3.50616	3.12532	3.83852	3.6972	3.72477	3.56349	0.629856	1.36788
Mdh2	3.36011	4.05486	3.83267	3.32211	2.94562	3.51278	3.56027	2.36993	2.92751
Ube2e1	2.69397	3.10949	2.24179	2.66223	2.26216	2.75457	3.55884	0.977081	1.68188
Snrpg	3.24862	2.72754	2.43218	5.77123	5.41004	4.82599	3.55662	1.69702	3.7111
Ndufc2	5.02518	3.95559	4.89813	4.48474	4.61582	5.61164	3.54792	3.17827	3.44723
Hmgcs1	3.67392	4.73971	4.00531	1.69427	1.97112	2.44817	3.53776	1.10375	1.9046
Ppp2ca	3.29712	3.09467	3.61633	3.11174	3.16176	3.42299	3.5374	2.22485	2.33109
Rtraf	3.55415	3.83028	2.72352	3.77462	3.78313	3.63846	3.53737	3.31351	3.98211
Fkbp4	3.36075	3.19855	2.40641	4.27882	3.0025	3.44502	3.53598	1.17799	2.70804
Ahi1	6.28465	3.01462	4.91678	4.39225	7.26603	7.21737	3.52948	2.96364	1.03641
Tomm20	5.3589	4.14013	4.19901	5.42088	4.44142	4.32262	3.52799	2.94532	4.00442
Eif3e	2.97745	3.30317	2.41361	3.40205	4.28117	3.29111	3.52323	2.80489	3.54111
Zfand5	2.18923	2.66058	2.42399	2.70428	2.30227	2.67155	3.52143	2.05075	1.46021
Zfp428	3.07023	2.80816	4.12075	2.60609	2.73741	3.47854	3.50386	0.518157	1.30452
Atp5o.1	3.51015	4.86038	4.55911	2.9167	2.67995	3.18374	3.49466	1.79706	5.04539
Uba1	1.85919	2.41561	2.09158	1.69404	1.52939	1.59647	3.48101	0.51777	1.3874
Nedd4	3.43617	3.52261	2.9588	3.21764	3.41324	3.32003	3.47529	1.3663	4.1642
Map2	2.18937	2.87828	3.3727	3.64333	4.35173	3.76635	3.47106	0.755871	1.13585
Dynll2	3.75518	3.38413	4.24895	4.0451	3.85257	3.92207	3.46128	1.79543	1.48856
Ranbp1	4.55251	4.36838	4.2258	4.04261	3.58825	3.86115	3.45716	2.3556	5.64217
Tcf25	3.48819	3.1839	3.41023	2.72047	2.9127	3.04709	3.44665	2.16823	1.95996
Atp5d	3.88981	4.33378	4.91343	4.01452	3.49189	3.65599	3.44501	3.50948	4.72935
Ube2b	3.52995	3.23238	2.8491	4.92264	3.97896	3.31386	3.43908	1.91444	2.10095
Zbtb20	2.32722	1.52615	1.77545	3.89933	4.94382	2.60085	3.42321	0.995844	1.55923
H2afy	3.40123	3.22343	2.11184	3.21428	3.41515	3.02492	3.40166	2.18189	3.21044
Srp14	4.2544	3.83293	4.23267	3.97001	3.90822	3.69186	3.39719	2.80994	2.54353
Ndufs5	4.60695	3.97911	4.83045	4.07834	4.34805	4.24041	3.39581	2.1145	2.68868
Gdi2	3.48201	3.97479	3.07298	3.37464	2.80367	3.09232	3.39178	5.86084	3.66713
Tbca	5.81185	4.71608	4.89213	12.984	5.06923	5.55609	3.38864	2.92479	4.02733
Nrxn2	3.77308	2.74221	5.32261	2.86105	4.2515	4.13478	3.38139	1.53492	1.03599
Pou2f2	2.81235	3.00957	1.20394	3.58539	5.27534	6.44795	3.37606	2.54669	0.998273
Idh1	2.12675	3.33241	2.34786	1.83905	1.83461	1.7499	3.3757	0.757527	1.17525
Rnf7	3.6651	4.00155	3.21383	3.37737	3.07534	2.95215	3.37046	3.55368	3.90015
Cbln2	0.206525	2.92061	3.65616	0.340818	0.212842	0.155165	3.36603	0.124667	0.304947
Snrpd2	3.73738	3.40057	3.67356	3.99247	4.11461	4.71896	3.35431	2.11092	4.1206
Rpl13a	3.42932	3.88182	2.18993	6.21838	5.53403	3.90498	3.34605	1.10224	4.48101
Ube2n	3.55637	3.92636	3.60144	2.92782	2.5425	2.93893	3.34327	2.00463	2.80994
Cnn3	0.855094	2.58893	1.03796	1.07268	0.578023	0.678459	3.34074	0.101795	2.87427
Crip2	2.5644	3.37012	3.17167	2.33323	2.28723	2.94596	3.33723	0.464444	1.30864
Eif5	3.00895	3.23296	2.92806	3.95275	2.95504	3.17203	3.33403	2.77927	2.83764
Vamp2	4.29308	3.40898	4.93945	2.65159	3.45949	3.62986	3.33194	1.3486	1.09441
Ldhb	2.0201	3.60259	2.93714	2.29642	2.82196	3.06438	3.3303	5.64987	2.6817
Psmb5	3.42044	3.38683	3.55067	3.17772	3.03502	3.74747	3.31922	1.89197	2.60988
Hnrnpu	2.82946	2.62345	2.41207	3.06473	3.02313	2.79216	3.30519	2.32874	2.88882
Mdh1	3.35208	3.53876	4.31408	3.07008	3.58294	4.1416	3.30332	2.4088	2.52947
Ppp1ca	4.36728	4.75044	3.21007	3.84139	3.11142	3.07024	3.29288	3.50303	5.13732
Edf1	3.73866	3.49998	3.58554	3.30367	3.06525	3.51992	3.27483	2.86537	3.45786
mt-Nd3	5.43771	3.47332	4.8419	3.75304	4.78164	6.64874	3.27102	5.50484	3.40586
Snrnp70	2.31169	2.35884	2.4009	3.09378	3.08373	2.87963	3.26795	1.93852	2.54405
Rab14	3.26327	3.27935	3.26315	3.44978	3.17805	3.60232	3.26784	3.27054	2.61755
Pomp	3.36366	3.37506	3.42358	3.24858	2.97292	3.79591	3.26364	4.2137	3.11158
Prmt2	3.28016	2.7073	2.96618	2.92585	3.1718	3.14921	3.26148	1.04505	1.0139
Arpc2	4.22995	3.81913	3.15193	3.49576	3.13698	3.57622	3.25511	5.88002	4.05711
Nhlh2	2.17706	5.90447	1.88943	0.282615	8.91283	0.557366	3.25146	0.272866	0.892676
Pfdn2	4.02331	3.51592	3.51222	4.35989	4.19514	4.49564	3.25069	2.06801	2.06522
Nrxn1	2.51377	2.37085	3.17017	2.01372	2.07568	3.5203	3.24181	1.26629	1.2358
Snrpd1	3.40177	2.96176	2.90587	3.548	3.80312	4.07092	3.24178	1.70524	3.34212
Fus	2.30695	2.72178	2.54498	3.27785	3.36594	2.95281	3.23916	2.00822	2.7281
Scg5	3.33704	2.08655	3.0405	3.16112	3.67757	4.6527	3.23859	1.06872	0.50087
Ube3a	3.24458	2.91245	3.7262	3.19945	4.11029	3.10527	3.23611	1.48233	1.55936
Tubb4a	1.83806	3.13567	2.23221	1.77706	2.0822	1.90816	3.23399	0.473134	0.611741
Smdt1	4.73205	4.39926	3.53399	4.48512	3.53804	3.71761	3.22533	2.60383	3.29241
Top1	1.96581	2.37467	2.19953	3.03611	3.1022	2.70913	3.21913	1.60531	2.17227
Slc38a2	1.85503	1.71534	1.6783	2.48654	2.81858	2.28062	3.21186	2.6084	1.34658
Rmst	0.841935	1.28659	3.22016	0.633377	0.766648	0.546929	3.20141	0.192704	0.284627
Ndufc1	3.80481	3.27098	3.63962	3.48374	3.59577	3.28846	3.17917	1.84982	2.51539
Smarce1	1.70399	2.35879	1.89309	2.43948	1.79176	1.84577	3.17254	0.711197	1.78344
Csnk1e	2.82185	3.04726	2.60205	3.00122	2.48195	2.93408	3.16799	2.53826	1.44397
Ndufb8	4.35593	4.51215	4.53804	3.57262	3.5776	4.57678	3.15801	2.82257	3.3463
Park7	3.70061	3.27185	3.81392	2.91028	3.03081	3.74041	3.15169	2.84088	2.79765
Cdk5r1	2.20816	2.41017	2.79334	2.26075	1.69744	2.51081	3.13255	0.622441	0.627869
Npdc1	3.89298	3.24024	3.43875	3.19866	3.28324	3.5024	3.13077	1.11284	1.27637
Akr1a1	5.20116	4.55222	3.11533	4.8408	4.20011	4.23695	3.12458	4.65218	4.96055
Rbfox2	2.54054	2.59862	2.33928	2.26754	2.3274	3.11042	3.12297	0.484941	1.15832
Uqcr11	4.78646	3.9771	4.7838	4.36027	4.18247	4.20806	3.1221	2.9845	3.62974
BC031181	3.21634	3.19902	3.1772	2.95465	2.84106	2.94682	3.12139	1.90297	1.90128
Caly	5.40776	2.19513	4.99525	3.61088	5.18915	5.41139	3.11994	2.21782	0.589159
Ndufa2	3.67869	3.55321	3.12632	4.66367	3.66401	3.75263	3.11962	2.58179	4.30212
Serinc1	3.06114	2.8255	3.43263	2.31788	2.83852	3.09871	3.11244	2.28976	1.60126
Mapre1	2.90459	3.39227	3.06025	3.19887	2.6289	2.83598	3.09988	1.95443	2.45122
Psmb2	3.354	3.23889	2.77223	3.84209	3.1578	3.74695	3.09295	2.13531	3.32468
Dlgap4	2.10355	2.24324	1.9835	2.20431	2.31408	2.31012	3.09019	0.602592	1.3754
Eif3k	3.00806	3.86989	2.68175	3.13347	3.54824	3.50372	3.08492	2.57932	4.38174
Ppdpf	3.20091	2.68502	2.58242	4.58537	3.38685	3.22994	3.08463	0.706033	2.07902
Calr	3.24932	3.38696	3.39299	2.15767	2.61941	2.80932	3.08302	3.68235	5.5863
Ndufab1	4.04278	3.47973	4.18873	3.64582	3.33777	3.82845	3.08064	2.41543	2.67463
Zfp706	3.29983	2.87283	3.05447	3.38065	2.69989	3.14408	3.08041	3.68984	2.686
Rundc3a	2.09875	3.06992	2.34192	2.73154	2.07198	2.20263	3.07075	0.531979	0.59796
Hnrnpc	2.34487	2.8216	2.15303	3.5903	2.69284	2.76457	3.06125	1.34452	2.71203
Timm8b	3.3449	3.03832	3.21432	3.44755	3.20568	3.17754	3.05282	1.42238	1.89003
Ptprs	2.29259	2.22315	3.49521	2.32065	2.90909	2.79893	3.04941	1.02608	1.56307
Srrm2	2.82337	2.75848	2.80622	3.58776	3.53662	3.30478	3.04672	2.88553	3.15482
Tcp1	3.14375	3.57895	2.61977	2.93878	2.80678	3.15037	3.04237	1.3736	2.89106
Pgam1	4.08768	3.68515	4.15578	2.55838	2.73877	3.24192	3.04128	3.28467	3.73213
Ndufb5	4.23524	3.75051	3.78533	4.35431	4.69099	4.73774	3.04122	2.69821	3.68484
Selenof	4.28087	3.09739	3.84637	3.12333	3.55493	3.03994	3.03648	5.87005	5.05836
Myl12b	3.24208	2.99203	3.28795	2.35823	2.21876	3.24466	3.03589	3.11806	1.89667
Rac3	5.30858	4.0194	6.57328	1.54593	2.77866	3.81586	3.02414	1.59811	1.5789
Pak3	2.64158	1.52609	3.17075	2.05617	3.25457	3.05669	3.01883	0.916661	0.595515
Csnk1a1	2.6185	2.49143	2.42064	3.12928	2.76125	2.71686	3.01727	2.08045	2.56626
Psmd8	2.12644	2.85206	2.28793	2.41222	1.89769	2.49161	3.01473	1.69168	2.28238
Rbm4b	1.57684	1.9448	1.69041	3.26185	2.51499	2.15241	3.01333	0.43323	1.27793
Mkrn1	2.01448	2.44696	2.81247	2.35674	2.25508	2.23203	3.01306	1.19567	0.881085
Srsf5	2.58838	2.32209	2.3635	3.5768	3.07037	3.13926	3.0129	2.58881	2.68987
Ncl	2.86921	2.51188	2.38395	2.6399	2.77824	2.77987	3.00173	2.75005	3.13139
Trir	3.15519	3.05276	3.10432	3.39802	3.11796	3.6527	3.00024	1.88645	2.73882
Hnrnpr	1.7906	2.06523	1.90475	2.41148	2.27555	2.47185	2.99324	1.01674	1.6075
Hmgn2	2.53806	2.39527	2.81471	4.97382	4.62327	3.79042	2.98773	1.79203	5.6131
Cops9	3.8039	3.37688	3.72642	4.61933	3.83948	4.02252	2.98591	1.65576	2.30052
Aldoa	5.43562	5.2757	6.04787	3.17008	2.99781	2.9404	2.98501	4.35711	4.68855
Psap	2.77531	2.95715	3.79319	1.76043	2.21326	2.45506	2.97688	10.5326	3.56056
Ypel3	2.13387	2.19011	3.50671	2.64457	3.49601	2.34977	2.9738	3.00039	1.47872
Bcas2	3.03426	2.82222	2.83686	2.99087	2.96175	3.46662	2.96699	1.66953	2.09002
Dctn2	3.06761	3.12938	2.71805	2.50118	2.64933	2.66967	2.96534	2.09762	2.18977
Plppr3	1.67538	2.43885	2.21081	1.76539	1.90728	2.22006	2.96403	0.378843	0.653429
Caprin1	2.29657	2.62969	2.21982	2.841	2.44524	2.18132	2.96397	1.18407	1.86037
Dclk1	2.54269	2.32513	3.45305	2.22411	2.73657	2.39551	2.96369	0.969613	1.4571
Vdac2	4.09906	3.85145	3.64395	3.11709	3.63899	4.03492	2.96255	4.29455	3.07467
Mff	2.80778	2.82125	3.13139	2.93934	2.43754	2.89552	2.95999	1.4659	1.73099
Rnf5	2.3187	2.7461	1.83448	2.63023	1.92985	2.4314	2.95919	0.710908	1.28504
Dctn3	2.97157	3.20457	2.75829	3.08995	3.02875	3.82259	2.95583	1.5088	1.57374
Cst3	5.02236	3.86731	3.27097	3.50612	4.33772	4.60917	2.95442	164.393	19.134
Anapc5	3.32631	3.51935	3.11835	2.95179	2.83513	2.96129	2.9437	1.32562	2.73212
Erh	2.83348	2.48569	2.65777	3.95667	3.64043	3.43532	2.93692	1.23297	2.20569
Cycs	3.73134	3.66431	4.48799	3.03437	2.97276	2.81775	2.93116	1.67876	2.4647
Minos1	4.07445	3.71328	2.88503	4.68339	3.98487	3.57016	2.92882	2.12296	3.30714
Pdap1	2.86899	2.97676	3.04825	2.65297	2.72478	2.58681	2.92771	0.887889	2.54643
Cmpk1	2.75145	2.88912	4.02624	2.59747	2.57609	2.65253	2.92238	1.7701	1.67908
Tsn	2.49891	2.55482	3.05234	2.52287	2.62183	3.08732	2.9219	1.71558	1.9978
Cdkn1c	3.05885	4.08324	1.697	4.57333	1.16799	1.57641	2.92133	0.260996	8.36561
Fnbp1l	1.94422	1.89369	2.89608	2.31141	2.49559	2.76875	2.9158	0.765283	0.910732
Nap1l1	3.15204	3.09746	3.33282	3.20575	2.82393	2.66948	2.90255	1.40863	6.32294
Cct2	3.31236	3.44428	3.07827	3.15388	3.2737	3.68107	2.89073	2.16711	2.29214
H1fx	2.26218	2.03709	2.14585	2.83458	2.78734	2.51156	2.88975	0.406204	2.06266
Atp6v1f	3.89577	3.27774	3.30134	4.24241	4.18832	4.14799	2.87217	3.41016	2.28108
Tsg101	2.66582	3.02911	2.52087	3.02843	2.50294	2.74908	2.87059	1.27703	1.65073
Uqcrfs1	3.06173	3.25267	3.1907	3.26591	2.90919	2.9576	2.86942	1.85113	2.16785
Rnf10	2.14139	2.31355	2.14239	2.42214	2.15571	2.33208	2.86765	0.94791	1.6944
Psmb3	2.97058	3.11962	2.79383	3.51173	2.75349	2.91614	2.85937	1.96552	2.9328
Bax	2.57905	2.81053	2.73259	3.26681	2.71987	2.30069	2.85892	1.92166	2.30192
Map2k2	2.53432	3.13842	2.78155	2.70165	2.04811	2.71631	2.8464	1.9413	2.46739
Svbp	1.61464	2.23255	2.29635	1.5871	0.984572	1.35631	2.84606	1.25319	2.00563
Ssb	2.34801	2.50815	2.30374	2.80882	2.67347	3.18641	2.84443	1.77841	2.37523
Camta1	2.39602	2.07445	2.89123	2.12709	2.96336	3.09966	2.84303	1.02328	0.988983
Fkbp8	2.72146	2.73467	2.53983	2.5474	2.16799	2.39925	2.84073	2.20831	2.43714
Trim35	2.59995	2.30337	2.50004	2.82828	2.39503	2.16276	2.83493	0.863134	1.45517
Psmb7	2.83541	3.3161	2.73631	3.15666	2.60702	2.76327	2.82919	1.24253	2.51812
Btg1	1.12167	1.279	0.938151	2.38922	3.49437	1.79965	2.82664	2.63402	1.30476
Cfl2	3.57936	3.51865	3.33347	3.6373	3.13646	3.37092	2.81961	0.815563	1.88473
Srsf7	2.19812	2.25093	2.12521	2.92404	2.19856	2.14533	2.81787	1.84009	2.60405
Hnrnph1	2.54516	2.80987	2.48261	3.06549	2.79644	3.03768	2.81421	1.65209	1.95523
Apbb1	2.44374	2.4628	2.30579	2.37178	2.3018	2.46419	2.81387	0.573156	0.760273
Cd200	2.72572	2.19078	3.85036	1.95336	3.01428	3.5343	2.81383	1.05372	0.504381
Blcap	2.21113	1.90985	2.80085	2.13852	2.31601	2.37889	2.80959	0.642557	1.05935
Ndufa13	3.74903	3.37403	3.62073	4.18135	4.0634	3.76376	2.80779	3.27801	3.90221
Wdr6	2.2995	1.58212	2.04724	2.54266	2.85467	2.99921	2.8072	0.913733	0.951957
Psma2	2.9938	3.11656	2.9324	3.2912	2.69052	3.06317	2.8033	2.23482	2.60853
Cct4	3.0171	3.56309	2.71516	1.89819	2.05522	2.41043	2.79915	2.15956	3.16136
Sdhb	3.12774	3.0673	3.1091	3.11146	2.57753	2.73955	2.7934	1.41306	2.51861
Cacybp	3.28906	2.782	3.48567	3.08789	2.69113	3.53272	2.78982	1.60515	1.90242
Gnao1	3.43618	2.9872	3.38708	1.91585	2.81745	2.64734	2.78518	1.35689	1.12608
Gtf2h5	2.67378	2.4273	2.70378	2.45891	2.5205	2.7956	2.78448	1.3526	1.98939
Dad1	3.1946	2.90965	3.10954	3.59022	3.29661	3.24227	2.7799	2.49373	3.31773
Sf3b6	3.30082	3.08114	2.6698	3.91183	3.30588	3.01481	2.77869	1.61833	2.55753
Hspe1	5.10902	3.32061	3.69083	4.2361	4.02986	4.31798	2.76457	3.58682	4.61337
Cct8	2.67513	2.80848	2.40119	2.23306	2.18873	2.68062	2.7596	2.11628	2.16079
Ptp4a1	2.23436	2.56133	2.30048	3.19763	2.65495	2.84968	2.73899	0.957198	1.50233
Txn1	4.18115	3.43348	3.02259	3.3535	2.89261	2.96398	2.73391	1.77876	5.3558
Fam57b	1.41951	2.26437	2.32538	1.63539	1.41634	1.42933	2.72721	0.127321	0.400937
Srsf11	2.04615	2.11989	1.90303	2.75403	2.71776	2.44334	2.72468	1.70033	1.98973
Bcl11a	1.01788	0.522964	3.39899	0.935167	0.744467	0.199042	2.72277	0.159747	0.515038
Ewsr1	1.70587	2.06345	1.84218	2.36735	1.89213	1.63585	2.72168	1.40479	1.73667
Ube2i	2.0017	2.1979	1.66667	2.85197	2.01678	1.97027	2.71532	1.79197	3.16385
Bzw1	1.77421	2.20215	2.50908	1.73324	1.56292	2.05218	2.71487	1.62831	1.70982
Trim28	1.53146	1.82511	1.6438	2.0904	1.55873	1.80268	2.71413	0.635375	2.1883
Eloc	2.77414	2.74945	2.89187	2.6625	2.52281	2.7372	2.70087	1.65343	2.21851
Mpped2	3.20453	1.25321	2.95813	2.21949	1.96748	1.37695	2.6975	0.607568	1.46341
Ube2v2	2.33656	2.52557	3.19454	2.29327	2.18767	2.34258	2.68919	1.08082	1.13818
Metap2	2.38944	2.22187	2.09756	2.386	2.48805	2.4275	2.68095	1.57058	1.84364
Scand1	2.48113	2.258	2.64317	2.80246	2.63781	3.01283	2.68042	2.10899	1.97904
Dync1i2	2.26145	2.46016	2.42921	2.65558	2.51594	2.60137	2.6741	1.44635	1.54577
C1d	3.10207	2.90688	3.47092	2.42831	3.08603	3.66558	2.66724	1.61895	1.77842
Fkbp3	4.03356	3.51775	3.76749	3.04849	2.91404	3.48177	2.66678	1.67512	2.90984
Ndufb11	3.14856	2.95835	2.94062	3.7495	3.7358	3.17847	2.66346	2.14461	2.98365
Cotl1	2.26012	4.58628	2.22058	1.57528	1.45852	1.90254	2.66109	4.1437	2.93271
C1qtnf4	2.31262	1.40532	3.45963	1.70944	3.01931	3.371	2.65719	0.985693	0.501876
Ndufa3	3.85455	3.32184	3.4123	4.85897	4.26676	3.39184	2.65092	1.7938	3.44662
Pafah1b2	2.32642	2.60095	2.44209	2.86387	2.14867	2.28678	2.64834	0.809518	1.49885
Uqcr10	3.72556	3.04667	4.07329	3.51276	3.43923	3.41227	2.64253	2.43451	3.39298
Trappc4	3.2144	3.26657	2.81176	2.78946	2.49951	2.7232	2.63921	1.09481	1.82782
Arhgdia	3.68693	3.36241	2.61475	2.18612	1.71778	1.81381	2.63378	3.95932	3.63114
Arl8a	2.62771	2.36148	2.94658	1.34063	2.12599	2.7793	2.63144	1.41557	1.29744
Cnbp	3.55834	2.92788	2.59308	3.94394	3.21665	3.30084	2.62242	2.93335	4.28959
Ndufb10	2.93189	2.98213	2.98426	2.8914	3.19606	3.27362	2.61963	1.81658	2.27612
Ppp3ca	2.28626	2.01336	2.89025	1.45263	2.94745	2.73383	2.61952	1.71838	1.30649
Psma1	2.07437	2.37383	2.15095	2.31336	2.29896	2.30715	2.61779	2.48889	1.83582
Oaz2	2.08579	2.56739	2.43472	2.93779	1.98936	1.82154	2.61737	0.631008	1.93983
Ppp2r1a	2.33301	2.65436	2.43676	2.20394	2.05726	2.10987	2.61517	0.980815	1.44236
Snrpb	2.40404	2.36397	1.88501	3.1501	2.66123	2.77564	2.61226	2.39981	4.01807
Sec61b	3.6001	3.03515	2.51832	3.69699	3.65071	3.44989	2.60135	2.92764	5.96938
Snu13	3.34709	2.71143	3.02369	3.22496	3.3731	3.31632	2.59577	1.76431	2.6387
Carhsp1	1.55004	2.3526	1.14301	1.9233	1.03662	1.40328	2.59325	0.16207	0.821944
Ndufa5	3.5327	2.75923	3.76823	3.14321	3.62655	4.39741	2.58716	1.68189	2.05614
Timm13	2.99514	3.04054	3.15968	3.24203	2.9205	3.15361	2.57653	2.28445	3.17144
Ndufs6	2.82499	2.64759	3.19979	2.65914	2.36987	2.8512	2.57631	1.35042	2.23733
Ppp1cc	2.20431	2.7396	1.96852	2.40556	1.9691	1.8327	2.57561	1.71385	2.90466
Tomm7	3.14556	2.38345	2.60675	3.4476	3.33081	3.47868	2.5742	2.3231	2.48233
Samd14	1.52263	2.03188	1.98932	1.94673	1.46215	1.69288	2.57024	0.342587	0.694388
Rab6b	2.40633	2.57804	3.09679	1.40545	1.79866	2.14078	2.57005	1.21399	0.623437
Hdgfl3	1.79604	2.22314	2.56641	1.98859	2.11147	2.14055	2.56987	0.418675	0.909677
Ndufv2	2.7273	2.60775	2.99094	2.57168	2.37095	2.79408	2.5691	1.57807	2.28833
Bzw2	1.68267	3.00063	2.49481	1.46314	1.74489	2.35531	2.56471	0.508924	1.38282
Pabpc1	2.89269	3.11159	2.55975	3.38992	2.83987	2.72477	2.56131	5.42407	4.34927
Ndufa11	3.41353	3.22113	3.97405	3.10905	3.35606	3.5786	2.55339	1.7768	2.84784
Ilf2	1.52051	2.2343	1.82385	1.87364	1.84909	2.01988	2.55253	0.597694	1.65256
Cacnb3	1.16521	2.76141	1.71995	1.33388	1.44191	1.78838	2.54521	0.156878	0.714227
Tia1	1.64636	1.86999	1.76156	2.53395	3.05729	2.90111	2.53376	0.775301	1.47212
Son	2.1144	2.37903	2.1409	3.11542	2.60811	2.14215	2.53095	3.26884	3.09732
Atp6v0d1	2.42013	2.93002	2.5615	2.49124	2.16721	2.24385	2.52949	1.50568	1.70575
Tra2b	1.79796	1.69024	1.72412	3.07699	2.51034	2.09693	2.52916	1.43754	2.25637
Grina	2.00466	2.25841	2.65172	1.78829	1.53436	1.81103	2.51855	1.79232	1.28897
Uncx	0.0188937	0.426349	1.37496	0.0119256	0.125268	0.135796	2.51642	0.0265146	0.0865391
Chd3os	1.79548	1.57021	4.05053	2.09469	2.86957	4.39739	2.51083	0.787934	0.482641
Mrpl20	2.92859	2.66926	2.83066	2.75285	2.44238	2.64274	2.50658	1.30487	2.10359
Lmx1a	0.0178145	0.0430748	1.78094	0.0260924	0.0218233	0.0224614	2.50541	0.021159	0.0914389
Mrpl52	3.17581	2.45915	2.60616	3.04518	3.55069	3.29103	2.50491	2.11321	2.21002
Rrp1	2.47558	2.25291	2.18526	2.46873	2.27861	2.85478	2.50402	1.53642	1.58538
Psmb4	2.64311	2.66089	2.41895	3.34147	2.89809	3.11508	2.50289	1.72305	2.48605
Ndufa6	3.15534	2.69796	2.39738	4.05605	3.94997	3.40572	2.50214	2.14594	2.02662
Kmt2e	1.69723	2.07541	2.01435	2.56266	2.52996	2.39114	2.49784	1.1069	1.17906
Slc25a5	7.20574	4.35832	2.77552	8.35082	4.34247	3.01298	2.49676	6.44267	7.07522
Hnrnpa0	2.17909	1.82787	2.16521	2.09918	2.71706	2.69517	2.48681	2.47444	2.3095
Cisd1	2.35636	2.42346	4.36936	1.8241	2.58532	2.55399	2.48123	1.10279	1.23864
Zcchc18	3.2177	1.79413	3.77906	2.49566	2.98407	3.92527	2.48116	1.33949	0.70918
Cct3	2.60196	2.62195	1.9967	2.47797	2.27617	2.37976	2.48039	1.36818	2.09625
Tbcb	3.20096	3.29064	3.57289	2.7008	2.44974	2.52159	2.47853	1.64772	2.23695
Romo1	3.98161	3.14275	3.43148	4.35042	4.35066	4.06687	2.47768	1.99062	2.71778
Foxp1	0.574878	0.512843	0.604385	1.54146	0.661316	0.416228	2.47386	0.29921	1.52375
Rcn2	1.84025	2.14055	1.86988	2.70264	2.04351	1.87617	2.47185	0.835268	1.79129
Nap1l4	1.54136	1.76976	1.62402	1.54834	1.58537	1.61688	2.46811	1.03183	1.21681
Tusc3	2.42482	2.02198	2.90685	2.14126	2.8736	3.24133	2.46675	0.945746	1.53656
Brwd1	1.62617	2.10738	1.84686	2.04318	1.97709	1.88069	2.46392	0.549623	0.825125
Fubp1	1.62267	2.08155	1.75121	2.27953	2.30628	2.18684	2.46093	0.901115	1.88694
Srsf6	1.99236	2.08409	1.92819	3.04756	2.10472	2.12768	2.45803	1.57855	2.68812
Dazap1	1.86326	2.22052	1.7518	1.5881	1.55956	1.3897	2.45502	0.887199	1.82217
Bnip3l	1.60766	2.34202	2.12222	1.80253	1.73618	1.68741	2.45409	1.52858	1.63336
Peg3	6.72133	2.45039	2.62203	6.97962	3.84668	6.41646	2.45229	2.59035	2.29489
Mcrip1	2.09495	2.07057	2.07235	2.10509	1.65611	1.97493	2.45072	1.66406	2.32524
Ube2d1	1.70315	2.84002	2.09808	1.47123	1.58927	1.62126	2.44965	0.365357	1.0685
Ank2	2.65355	2.61807	3.05918	1.35759	2.58911	2.50799	2.44777	1.46202	1.45739
Cadm1	1.38035	2.89739	5.9479	1.69633	2.95611	2.58915	2.4399	1.31848	0.959814
Araf	3.00375	2.31074	3.18977	2.43765	2.56841	2.96356	2.43315	1.34917	0.973561
Arpc3	2.51876	3.12734	2.03667	2.06794	1.94491	2.54603	2.4286	4.36233	3.05627
Rab10	2.57181	2.72671	2.46738	2.26017	2.01878	2.04543	2.4282	1.04902	1.94127
Snap47	2.83733	2.24203	3.48984	1.83783	2.53791	3.76372	2.42695	1.18054	0.903149
Rnf165	1.25327	1.70771	1.2586	1.1881	1.19675	1.15503	2.42582	0.147023	0.602656
Ndufb7	3.01744	3.07447	2.58877	3.06665	2.83392	2.84615	2.42575	1.61948	2.5498
Stub1	3.05188	2.54614	3.05151	2.7334	2.46173	2.91946	2.42207	2.06645	2.47585
Akirin2	1.87951	2.53479	1.95853	2.37927	2.08785	2.05362	2.42121	1.15307	1.42591
Uqcrc1	1.83767	2.3756	2.14177	1.87535	1.61426	1.79168	2.41662	1.36979	2.48244
Ssbp3	1.93705	2.0172	1.51402	2.28574	2.00447	2.47251	2.41581	0.885122	1.35911
Brk1	2.82071	2.88897	2.60916	2.8706	2.50948	2.51808	2.41385	3.3733	2.72982
Cmas	2.13278	2.57774	1.87245	1.71383	1.65802	2.26146	2.41328	0.742289	0.919679
Mpnd	1.1203	1.61341	1.3988	1.39669	0.96791	0.835871	2.41229	0.499221	1.1208
Mrpl34	2.2994	2.72881	1.87915	2.44443	2.09178	2.18328	2.41179	1.0054	1.35827
Nenf	4.5153	2.5382	3.43861	3.02279	3.31722	3.16219	2.41115	2.13652	2.71222
Strap	2.4628	2.14395	1.79872	2.57905	1.91081	2.35907	2.39942	1.31328	1.91878
Pja1	2.49618	1.98881	1.94372	2.97269	2.85508	2.75525	2.39847	0.917193	1.25311
Sms	3.53015	3.43206	2.81115	2.25251	2.77268	2.49671	2.39773	0.925425	1.36821
Erp29	3.39333	2.65772	2.69637	2.965	3.17577	3.00496	2.397	5.7965	3.16637
Slc22a17	2.99753	2.01331	2.88093	2.04675	2.99124	2.62092	2.39037	1.44378	1.16532
Uqcc2	3.11467	2.80355	2.94041	2.09875	3.60651	2.13008	2.39029	1.37741	2.86005
RFP	2.16526	2.36753	1.64982	2.18346	3.12169	1.17781	2.38561	1.0412	1.06068
Calb2	2.09794	0.708393	2.84673	0.471172	0.855443	3.93963	2.38437	1.24963	0.252727
Sept3	1.93759	2.0046	1.97318	1.64935	2.15493	1.93036	2.38177	0.558004	0.718801
Rheb	3.25053	2.71919	3.16727	2.58894	2.48934	2.95003	2.37802	2.08376	2.5397
Nisch	2.40081	2.09084	2.27213	3.05489	2.8013	2.80921	2.37725	1.48971	2.16964
U2af1	2.0607	2.27618	1.91352	2.42777	2.44573	2.32806	2.37456	1.13753	2.69545
Smarca4	1.36391	1.89669	1.34718	1.4866	1.27327	1.40861	2.37435	0.742231	1.38861
Emc10	1.84017	1.94479	2.53712	2.03863	1.80675	1.81131	2.3737	1.47571	1.77328
Syt11	3.19528	2.48404	2.48524	2.75087	2.54513	2.70452	2.37054	1.62994	1.26599
Sf3b2	1.72001	1.77607	1.8012	2.19209	2.13792	2.02382	2.36926	1.82939	1.57463
Sumo3	2.12052	1.89162	1.91913	2.65276	2.23865	2.31832	2.36915	1.29269	2.10929
Ppp1r14b	2.93966	2.29782	2.20755	2.22132	1.46983	1.85235	2.3669	2.87352	3.85781
Mbd3	1.89774	1.92763	1.46336	2.50844	1.71935	1.65351	2.36552	1.30252	2.15924
Cript	1.73633	2.23259	1.80107	1.75988	1.58243	1.53292	2.36524	0.79899	1.3522
G3bp2	1.80181	2.45866	2.82952	1.84979	1.3997	1.72658	2.36438	1.57954	1.34726
Reep5	3.8173	2.92491	4.08738	1.96218	2.16074	2.2918	2.36126	3.37047	3.1481
Hnrnph3	1.33253	1.61397	1.22829	1.88629	1.88458	1.54114	2.36044	0.423034	1.04088
Chmp5	1.83031	2.17267	1.7988	2.52372	1.98642	1.75032	2.35263	1.21398	1.20084
Ubald2	1.34647	2.51699	1.52248	2.22433	1.70166	1.57323	2.35133	0.875825	1.35876
Atp6v1e1	1.92858	2.54201	2.46563	1.57144	1.37908	1.67305	2.34938	1.49815	1.32402
Mettl9	1.99429	2.36524	2.09627	2.47611	2.25731	2.46743	2.34824	1.16566	2.59403
A730017C20Rik	2.24777	1.40957	1.7062	1.98205	2.52183	2.75604	2.33611	0.65815	0.426101
Ndufv3	4.0045	3.29602	3.53738	4.15942	3.11742	3.52482	2.32393	2.22161	2.24904
Vps28	2.25512	2.41092	2.31919	2.32978	2.17936	2.12852	2.31991	1.56852	1.49477
Celf3	1.58871	1.96359	1.22747	3.09247	2.23928	1.72275	2.31773	0.396167	0.447181
Prkaca	2.32235	2.48944	2.06893	1.98653	1.6564	1.83924	2.31661	0.767414	1.36411
Klhdc8b	1.79216	1.54078	0.631887	3.86298	2.10623	1.98064	2.31509	0.647535	0.65738
Ndufs4	2.4349	2.57511	2.47171	2.31217	2.6315	2.93501	2.31353	1.22412	1.73942
Gabbr1	2.81402	4.18144	3.56183	1.89711	2.45869	2.67667	2.31311	1.35949	1.4161
Cbarp	3.88077	2.00584	2.49174	2.20738	2.29503	2.26034	2.31267	1.36143	0.631073
Arl2bp	2.4914	2.52775	1.89507	2.45446	1.95781	1.70496	2.31072	0.617706	1.80299
Pdxp	1.99045	1.75927	2.62857	1.56689	1.59876	2.23559	2.30635	0.777081	0.425954
Traf4	1.14202	1.73452	1.04784	1.73599	1.13795	0.800888	2.30505	0.0778945	1.14721
Ddx39b	2.11583	2.17812	1.75782	2.81458	2.35135	2.63595	2.30216	1.92142	2.61475
Sept7	2.21543	2.31662	2.12934	1.84762	1.85236	1.98115	2.3011	1.82445	2.552
Hras	3.27483	2.536	3.35074	2.09894	1.94382	2.47489	2.29608	2.49863	1.5589
Actl6b	1.4215	1.94924	2.11173	1.53627	1.57924	1.64918	2.29448	0.299749	0.419526
Laptm4a	2.14321	1.71842	1.22839	2.98715	2.25964	2.51515	2.29186	3.07421	7.89152
Psma4	2.25286	2.56614	2.18863	2.34508	1.91745	2.07567	2.29169	1.27305	2.92835
Tmed2	2.5054	2.30862	2.14751	2.61229	2.81901	2.6537	2.29087	2.21905	3.40564
Itm2b	3.20269	3.22289	3.56973	3.25312	3.41214	3.96125	2.29014	44.0872	9.18962
Ndufa8	2.69993	2.22179	2.8364	2.43752	2.53559	2.95985	2.28984	1.70732	1.59838
B630019K06Rik	2.08534	1.12852	1.83104	2.21043	5.10101	2.51987	2.28913	0.440524	0.335092
Rab7	2.31387	2.36266	2.38754	2.24455	1.9208	2.31339	2.28849	2.31659	1.62337
Pdcd5	3.11312	2.66101	2.88511	3.00544	2.84264	2.92581	2.28642	1.48846	2.88675
Akap9	1.59483	1.66624	1.90274	1.80235	1.92496	2.36219	2.28426	0.808228	0.896687
Klhdc2	2.03038	1.99021	1.77799	2.64267	1.8576	1.94462	2.27813	0.924265	1.40979
Gnai2	4.28436	2.81046	1.44766	4.35378	3.76913	3.12496	2.27257	9.09296	5.32593
Ndufb2	3.44582	2.83235	3.92288	2.73493	3.17014	3.44114	2.26888	1.52778	1.98188
Rraga	1.55911	1.91204	1.91581	1.44067	1.59416	1.66189	2.2632	0.789457	1.03258
Psmd7	2.05579	2.00801	1.87754	2.19046	1.96949	2.27551	2.25914	1.2153	1.80026
Scoc	1.85901	1.92151	2.96576	1.55333	1.46333	1.83557	2.25614	2.72941	0.890056
Fdps	2.94335	3.31555	2.98612	1.60902	1.83481	2.28321	2.25386	1.06326	1.6181
Tomm22	2.44974	2.58797	2.66363	2.60852	2.02759	2.29021	2.25317	1.90284	2.3952
Slc17a6	0.489668	0.827642	2.72863	0.0789888	0.718005	0.0640295	2.25126	0.346975	0.14146
Luc7l3	1.77042	1.65639	1.73328	1.83236	2.54215	2.22017	2.24892	0.903361	1.51129
Snrpf	2.55643	2.28158	2.22272	3.8987	3.7895	3.00539	2.24748	1.48585	2.91966
Rsrc2	1.52996	1.64843	1.59811	2.33016	2.1038	1.62671	2.24528	1.02199	1.37472
Dcakd	1.3361	1.86797	1.61082	1.77769	1.58873	1.52474	2.24521	0.537035	1.62384
Klf7	2.38475	2.99736	2.21144	1.76977	1.27042	2.0604	2.23499	1.53665	1.07855
Sec62	2.08431	1.96607	2.35937	2.4228	2.52667	2.69142	2.2256	1.78759	1.85297
Rala	2.77611	2.82256	2.37664	2.13202	2.0008	2.09635	2.22495	1.02748	1.90333
Acat2	1.90002	2.61728	1.99661	1.20604	1.18214	1.43536	2.22266	0.321262	1.34027
Smarca2	1.59643	1.17675	1.79535	1.22112	1.32833	1.578	2.21801	0.724531	0.703453
Arl3	2.07674	2.35235	1.99188	2.62286	2.19302	2.2278	2.21798	0.544084	1.57554
Actr3	2.33958	2.45048	2.00039	2.00097	1.6026	2.06078	2.21496	2.41746	1.8447
Wsb1	1.35038	1.56092	1.51178	1.92966	1.96963	2.03224	2.21228	2.4294	1.22627
Olfm1	1.70072	5.27867	4.41736	1.49118	0.730732	0.934847	2.21018	0.514178	0.849249
Efnb3	1.84473	1.2956	1.98553	2.53269	2.1115	2.34587	2.20857	0.700875	0.654973
Ip6k2	1.23682	1.37315	1.33634	1.64647	1.4655	1.55679	2.20558	0.245548	0.726103
Tmem234	2.15198	2.414	2.12199	1.72244	1.64101	1.75095	2.2049	1.9541	2.27808
Ppib	1.55813	2.2051	2.37734	1.28805	1.13984	1.26262	2.20365	3.14177	6.32141
Kif1b	2.5526	2.41584	2.65866	2.22471	2.77926	3.12144	2.20334	1.30668	1.5224
Stx7	2.26921	2.51457	2.60188	1.67024	1.76355	2.29539	2.2005	2.19495	1.10449
Gria2	2.39583	1.59398	2.72268	2.66818	3.89992	3.25643	2.19879	1.36316	0.807438
Rac1	2.10135	2.25425	1.86465	1.88185	1.6744	1.58664	2.19778	3.11957	3.10351
Psma6	2.05204	2.25461	2.0083	2.3325	1.88822	2.25046	2.19715	1.28742	2.07744
Skp1a	1.88531	1.92032	2.03834	1.91938	1.81667	2.077	2.19538	0.968159	1.58547
Trp53i11	1.05619	2.78229	1.25608	1.61851	1.09549	0.656247	2.18807	0.0596998	0.856376
Rab18	1.87106	1.88365	2.43696	1.86772	1.53445	1.78841	2.18151	1.05545	1.3525
Ncan	1.40057	1.3185	1.51412	1.55174	2.1045	1.50706	2.17877	0.347577	1.04293
Phb2	2.61081	2.59345	2.20554	2.49734	2.2002	2.38692	2.1716	1.61923	2.97776
Rbm25	1.77129	1.73831	1.74488	2.058	2.12051	1.988	2.17144	1.69252	1.7904
Puf60	1.65625	1.6481	1.6132	2.18366	1.78661	2.03251	2.16955	1.06448	1.69791
Sh3bgrl	1.23154	1.89403	2.05848	1.22473	1.95605	1.64533	2.16482	0.453198	1.25164
Reep1	1.98323	2.10033	2.73014	1.10497	1.5809	1.8644	2.16196	0.618092	0.516524
Hdgf	2.10282	1.95745	1.69645	2.39679	1.89329	2.51328	2.15888	1.11311	2.21559
Smarcb1	1.74641	2.03991	1.58777	1.81596	1.77941	1.93012	2.15212	0.826199	1.65548
Nxf1	1.56247	1.64806	1.70425	1.97012	1.63421	1.70204	2.14837	1.00755	1.63044
Atf4	1.66815	1.46875	1.32022	1.95324	1.37672	1.56539	2.13694	1.61371	1.48194
Vbp1	2.38729	2.50352	2.02187	2.58333	2.83277	2.62915	2.13589	0.807266	1.03257
Coa3	2.59778	2.36992	2.7874	2.04651	2.07537	2.5589	2.13506	1.76695	1.98963
Smim14	2.39621	2.34238	1.96645	2.01188	1.94901	1.92908	2.13494	1.17051	1.21266
Zc3h15	1.95192	2.07209	2.33334	1.62793	1.83348	1.94704	2.1336	0.648992	1.43317
Psma5	2.41988	2.22359	2.09988	2.55229	2.47833	2.6735	2.13278	1.64048	2.56937
Fam103a1	1.61707	1.7379	2.52856	1.58218	1.55722	1.78631	2.13221	0.976662	1.16267
Pkia	1.53174	1.40335	2.99328	1.06798	1.28569	1.85894	2.12938	0.641722	0.420942
R3hdm4	1.40894	1.87217	2.10114	1.56896	1.42925	1.22807	2.12626	0.984165	0.964939
Pfdn1	2.59293	2.58331	2.42083	2.53082	2.45021	2.33432	2.12609	0.978237	1.98656
Irx6	0.0144229	0.284523	0.102365	0.00791131	0.0325334	0.0245525	2.12519	0.00336504	0.0400643
Spcs2	2.57112	2.26542	1.79847	2.66586	3.16461	2.93163	2.12462	3.1069	2.55005
Tmod2	2.26206	2.37837	2.99542	1.75492	2.05825	1.86789	2.12135	0.774196	0.898956
Cyc1	1.86331	2.27689	2.62118	1.66922	1.60749	1.82874	2.11905	1.14189	2.07189
Prdx5	2.57508	2.29464	3.53781	2.06865	2.13923	2.34074	2.11674	2.79467	2.64427
Atp6v1d	1.78023	1.67033	2.03043	1.35968	1.64319	1.8372	2.11567	1.03102	0.852206
Cetn3	2.34349	2.31627	2.3227	2.74181	2.78469	2.88365	2.11511	1.52932	2.00935
Nop10	4.30879	3.05435	3.33705	2.84644	3.49599	3.60069	2.10839	1.72072	2.54889
Raly	2.41737	2.75512	1.75068	2.62117	1.69367	1.92747	2.10722	1.84084	5.13633
Chd3	1.06245	1.24553	1.71347	1.36723	1.38701	1.19831	2.10411	0.446463	1.08225
Dtx3	1.4821	1.76877	1.76005	2.1236	2.07279	1.77029	2.10336	0.534512	1.09054
Capzb	2.48857	2.86418	2.03766	2.36891	1.96096	2.13568	2.10064	4.34691	3.82467
Hap1	4.89275	1.83644	3.24098	6.38636	5.88626	6.51369	2.09605	2.24762	0.830858
Saraf	2.56803	1.92047	1.98661	2.12892	2.65497	2.15943	2.09445	2.63908	1.4036
Chtop	1.37991	1.58466	1.43135	1.74781	1.40704	1.51166	2.09319	0.702043	1.45244
Runx1t1	1.28462	2.12286	1.36485	0.662502	1.21367	0.97403	2.09298	0.279161	0.788091
Snrpd3	2.06638	1.96532	1.96397	2.22765	2.21139	2.83959	2.09138	1.21918	1.83488
Selenoh	2.13148	2.33293	2.64459	1.91081	2.54486	2.11778	2.09092	1.35488	3.61807
Nt5dc2	1.05794	2.32426	0.82321	1.39169	1.03332	1.21947	2.09069	0.434587	2.26668
Eef1e1	2.44798	2.31272	2.16147	1.79151	1.99159	2.29251	2.08775	0.837471	0.75562
2900097C17Rik	1.86564	1.68133	2.36363	1.77857	1.76253	1.61504	2.0875	1.01955	1.33529
Tmeff2	2.5085	2.37604	2.06761	1.04724	2.65564	1.01355	2.08443	0.659694	0.530667
Serp2	3.54362	2.33992	3.48268	2.34265	2.13597	3.13235	2.08418	1.20027	0.73351
Eno1	2.61162	2.84621	2.25955	1.49733	1.40932	1.38576	2.08337	1.39771	3.37509
Pafah1b1	2.86858	2.13118	2.53575	2.16842	2.29278	2.27852	2.08061	1.94185	1.67931
Prelid1	2.85069	2.96797	2.29891	2.03745	1.66832	1.78745	2.07969	1.53131	3.80055
Pak1	1.46716	1.68114	1.25275	1.18652	1.10065	1.70682	2.07389	0.663397	0.513327
Mat2a	1.77526	1.78221	1.55546	1.9752	2.29529	2.00315	2.07357	1.47354	1.66954
Pnisr	1.31998	1.45025	1.7563	2.08644	2.63717	1.59831	2.07339	1.0433	1.47876
Trappc6b	2.7454	2.26267	2.46855	2.23499	2.36339	2.49417	2.07184	1.60585	1.05124
Fdft1	1.72909	2.54515	1.71718	1.26045	1.08806	1.28141	2.06723	0.350091	1.11875
Rtl8b	2.20349	2.16282	2.08798	2.50342	2.15772	2.46074	2.0672	0.589677	0.940083
Mapre2	1.52565	1.9281	1.62305	1.02247	1.20385	1.35889	2.06239	0.697254	0.768536
Mien1	2.16194	2.34377	3.29612	1.4946	1.71135	1.65169	2.05943	0.999515	1.26544
Spcs1	2.64049	2.20602	2.35333	2.10616	2.34117	2.29394	2.05762	2.04792	2.74225
Mapk8ip1	2.5837	2.48943	2.52903	2.22039	2.10368	2.18947	2.05588	0.591893	0.795608
Tac1	0.315991	1.18448	0.921992	0.0502031	0.265675	0.278218	2.05563	0.14432	0.171232
Atp6v0e2	2.42305	1.90039	3.11668	1.46566	1.59098	2.22846	2.05206	0.861769	0.59505
Gtf2a2	2.07467	1.88701	2.13967	2.08266	2.17368	2.02195	2.05166	1.23778	1.76051
Chn1	1.38765	1.77082	1.42343	1.029	1.03556	1.15038	2.04739	0.376577	0.646585
Rtf1	1.48071	1.63794	1.56295	1.95761	1.59733	2.06594	2.04453	1.05794	1.33607
Hspd1	2.42199	1.97335	1.9275	1.78861	1.74147	2.00122	2.04135	1.5706	1.94451
Epn1	1.49276	1.5836	1.81581	1.53694	1.28417	1.49142	2.03995	2.17666	1.31779
Pcp4	2.75399	6.08693	3.29511	2.09345	4.91617	1.52424	2.03873	0.800577	0.363213
Tmem258	2.00539	2.01168	1.86224	2.52977	2.30795	1.93426	2.03871	1.62508	2.43972
Zfhx4	0.565535	0.656395	0.725129	0.341592	0.787157	1.21216	2.03716	0.186542	0.55512
Gabarapl1	2.61112	2.10903	2.20242	1.93524	1.75465	2.19797	2.03592	0.921348	0.857397
Higd2a	2.43229	2.29263	2.12711	2.53108	2.47129	2.28136	2.03504	2.66187	1.95718
Rnps1	1.79646	1.90717	1.61676	1.7121	1.53039	1.47943	2.03278	0.61922	1.45758
Cd81	2.86661	2.40712	2.61343	2.94819	3.25877	3.01076	2.03215	14.3079	7.84517
Prdx1	3.64055	2.55744	2.28371	3.00749	2.52259	3.08297	2.0289	5.72842	6.37337
Brd3	1.55911	1.68016	1.45109	1.92838	1.82499	1.78544	2.02551	0.426894	1.44875
Eif4e	1.7191	1.70251	1.65112	1.77362	1.74069	1.84663	2.02477	0.865497	1.3082
Mageh1	1.4708	1.72319	1.69643	2.55478	2.3711	2.24514	2.02252	0.378148	1.10207
Hnrnpf	1.72501	1.65953	1.44117	2.41429	1.66215	1.6448	2.02141	4.34389	4.4291
Usp22	2.26644	1.92189	2.05958	1.95529	2.56108	2.88276	2.02086	1.04828	1.02351
Ndufa12	2.73176	2.38554	2.48078	2.57712	2.59733	2.30792	2.02055	1.40079	1.94078
Pnmal2	2.0421	1.11335	2.37588	1.76308	2.11159	2.66602	2.0173	0.881857	0.506947
Sdcbp	1.42209	1.88708	0.85123	1.80345	1.16486	1.48561	2.01296	4.4056	1.58748
Csde1	2.14105	2.17037	1.81649	2.26536	2.35227	2.29483	2.01233	1.66634	1.72337
Ssbp2	1.73989	0.889497	0.848071	3.35177	0.978785	1.69483	2.01158	0.643673	1.28594
Cck	0.004482	0.0244862	0.136882	0.00292142	0.0179212	0.0227135	2.01131	0.00600698	0.0328677
Ccdc88a	1.76827	1.66209	2.16448	1.47531	2.02882	2.02553	2.01013	0.798221	1.3409
Glrx3	2.63536	2.82054	2.25684	1.89341	1.61884	1.9726	2.00948	1.30495	2.51994
Zcrb1	2.34984	2.12528	2.11575	2.71257	2.40813	2.16938	2.00897	1.31442	1.75288
Bag6	1.17327	1.2002	1.13305	1.57319	1.31312	1.50632	2.00668	0.684451	0.830386
Psmd4	1.9618	1.94281	1.91157	2.30736	1.94413	2.03769	2.00418	1.32327	1.82622
St13	2.28228	1.9159	2.48412	2.56128	2.29784	2.39371	1.9969	2.22681	2.13208
Bex4	3.57766	2.05	3.03737	2.69483	2.99645	3.83688	1.98996	0.839761	1.26575
Ncor1	1.33753	1.59218	1.61722	1.47174	1.47463	1.41627	1.98855	1.28192	1.70688
Palm	1.60825	1.86053	1.96253	1.41564	1.36921	1.45982	1.98574	0.395368	0.709026
Acin1	1.38621	1.31078	1.31846	1.96385	1.78081	1.83744	1.98448	1.33078	1.3663
Rnf11	2.04	1.63933	2.30082	2.21216	2.11087	1.90497	1.98433	0.769966	0.9311
D8Ertd738e	2.56668	2.28151	2.05616	2.75776	2.08571	2.34407	1.98251	2.01679	2.85304
Arpp19	1.98479	1.86045	1.78444	2.10423	1.6997	2.13059	1.9803	1.71236	2.36459
Eif2s2	2.31945	2.34206	2.09724	2.14248	2.39949	2.21551	1.97979	1.63218	2.71295
Gdpd1	0.986114	1.48996	1.48569	1.13112	1.18666	1.36498	1.97292	0.344667	0.375672
Yeats4	1.88601	2.10345	1.79684	2.07964	1.6665	2.10215	1.97005	0.95702	1.34963
Nxph1	0.163259	0.171366	1.06148	0.0958935	0.0898657	0.115726	1.96856	0.0353047	0.0978861
Nav1	1.79776	1.32373	2.71641	1.67706	2.49099	2.29468	1.96697	1.02603	0.965371
Tcaf1	1.78716	1.7158	1.90719	1.65654	1.8002	1.92676	1.96416	0.581183	0.874452
Irf2bpl	1.10475	1.3309	1.85783	2.03371	1.97434	2.07502	1.96151	0.839114	0.55843
Cops6	1.44743	1.94803	1.62369	1.41178	1.13553	1.13799	1.96129	0.940008	2.01782
Sgta	1.54077	1.71776	1.81755	1.78814	1.81031	2.09462	1.95797	1.02495	1.23614
Sh3bgrl3	2.81677	3.19845	3.48002	1.96187	1.66834	1.43939	1.95754	6.96384	4.92732
Dpysl5	1.24774	1.71333	1.8403	0.959536	1.20707	0.991229	1.9561	0.288004	0.507815
Ndufa1	3.14926	2.82324	2.80665	3.03626	2.67869	2.91112	1.95591	1.68452	1.86676
Syp	2.9976	1.72416	3.37586	1.57845	1.81236	2.2046	1.95455	1.41394	0.412302
Tmed9	1.30464	1.5667	1.76181	1.0081	0.869613	0.880372	1.95253	2.28751	2.46887
Fam171a2	1.42465	1.50394	2.41988	1.20139	1.74666	1.85186	1.94899	0.436662	0.562441
Celf5	1.52059	1.43398	1.50492	1.95943	2.2031	1.65369	1.94656	0.477282	0.402241
Tmem59	2.10068	2.34128	1.90955	2.7155	2.76175	2.80809	1.94475	3.50718	2.38512
Lsm7	2.4957	1.85453	2.1619	2.85091	2.47525	2.74943	1.94198	0.903542	1.917
Capza2	1.93903	2.07427	1.99018	1.81387	1.7507	2.00525	1.93917	8.18602	2.67853
Rnf14	2.16535	1.87436	2.66463	1.36886	1.37252	1.81334	1.93896	0.906176	0.772741
Myef2	1.77393	1.79824	1.89746	2.06842	2.38015	2.01216	1.93746	0.564621	1.05404
Stx12	1.95506	2.09191	2.05661	1.83739	1.75614	2.05247	1.93636	0.92663	1.12589
Lamp1	2.24286	2.27235	2.16568	2.07996	1.92011	2.07059	1.93587	10.0321	4.57371
Irx3	0.0236693	0.598898	0.197838	0.011701	0.0700121	0.0393132	1.93433	0	0.270869
Arl4c	1.33743	1.54743	1.49419	1.20921	1.20736	1.46797	1.92378	2.07155	0.700365
H1f0	1.1611	2.01293	0.881677	2.26749	1.92941	1.08763	1.91873	0.564468	3.78073
Pxylp1	0.123095	0.291125	0.428703	0.210584	0.519776	0.252616	1.91491	0.0514455	0.121839
Hcfc1r1	2.42296	2.11564	2.13287	1.60425	2.04695	2.23281	1.91295	1.13649	1.30623
Maged2	2.65674	1.94054	2.07875	2.14955	2.48425	2.44009	1.91173	1.16271	3.22442
Polr1d	2.61172	2.1729	2.11943	2.21502	2.38744	2.37442	1.91102	2.12704	2.71012
Kifap3	1.28424	1.542	2.08685	0.834202	0.948671	1.21182	1.90856	0.515059	1.00068
Nudc	1.90069	1.70752	1.75602	2.12593	1.94701	2.37189	1.90438	1.63018	2.07938
Shd	0.782952	1.24052	1.30667	1.15676	0.981415	0.906703	1.90304	0.23011	0.404997
Gramd1a	1.24332	1.43449	1.23584	1.52836	1.37935	1.40858	1.90202	1.02921	0.780522
Dnajc7	1.47497	1.79004	1.67794	1.6206	1.69088	1.78708	1.90157	1.19027	0.990712
Cdh2	1.67486	1.5064	1.15776	1.54871	1.41469	1.37846	1.89985	0.425885	0.806597
Rab11a	1.85141	2.52137	2.07114	1.91114	1.32298	1.32782	1.89617	1.4878	1.79425
Ergic3	1.82636	1.79052	1.9071	2.00846	2.08132	1.96384	1.8863	1.7009	2.46057
mt-Nd4l	3.75142	1.81266	3.40871	1.77086	3.39465	5.95906	1.88629	4.7963	1.77741
Tsnax	1.66253	1.5606	1.67965	1.19788	1.62018	2.00984	1.88487	0.826725	0.901878
Mir124-2hg	0.0651848	1.52726	1.46237	0.13139	0.213274	0.288123	1.88091	0.0436814	0.185788
Eif3i	2.42042	2.22597	1.81415	2.2729	2.29973	2.34753	1.87776	1.92119	2.96311
Dda1	2.49046	2.30112	2.54582	1.81489	1.77624	1.99653	1.87739	1.13248	1.12075
2410015M20Rik	2.50722	1.99214	1.71835	2.47841	2.34388	2.41404	1.87461	1.89366	2.19303
Inpp5f	1.90891	1.68041	3.91646	1.40785	1.89061	1.71252	1.87219	0.964064	0.466889
Fam32a	1.7983	1.78911	1.67726	1.88192	1.66934	1.64639	1.8714	1.0843	1.19303
Ndrg4	2.2005	1.69508	3.4526	1.09423	1.21665	1.79389	1.86787	1.3707	0.482838
Dnajc5	1.80814	1.69855	2.27896	1.61751	1.54176	1.74751	1.86774	0.973878	1.00747
Drap1	2.18972	1.93476	2.23163	1.89911	2.2509	2.15278	1.86236	1.55358	1.7997
Taldo1	1.48903	1.82687	1.54932	1.60457	1.5577	1.45199	1.86222	2.50461	1.78199
Cacfd1	0.993835	1.20744	1.09817	1.55139	1.32132	1.25441	1.85844	0.303188	0.62559
Ctnnbip1	1.74281	2.12141	2.3025	1.02775	1.34139	1.45572	1.85626	0.843282	1.39842
Trmt112	2.07321	1.7614	1.86118	2.37069	2.15021	2.08232	1.85357	1.72597	1.86163
Ppp1cb	1.4229	1.60182	1.68015	1.40655	1.484	1.34498	1.85254	0.788688	1.06813
Mrps33	1.74466	1.79162	2.08334	1.81255	1.71404	1.947	1.85242	1.69692	1.95415
Ankrd11	1.50684	1.4278	1.24019	1.53126	1.4935	1.59852	1.8487	1.52557	1.41974
Mycl	0.603842	0.686931	0.882767	1.0933	0.723732	0.866099	1.8429	0.282158	0.188697
Cbx1	0.978126	1.58568	1.04476	1.53799	1.48412	1.59733	1.83975	0.754819	1.75225
Parp6	1.65292	2.14686	1.7717	1.7052	1.32747	1.09301	1.83748	0.38203	0.499649
Eif4h	1.73527	1.68124	1.59324	1.89419	1.7831	1.69505	1.8371	1.51224	1.93928
Arl6ip5	1.90293	2.09497	1.79269	1.44716	1.89587	1.50851	1.83694	2.22099	1.5173
Psmc5	1.70312	1.97298	1.87313	1.71942	1.42576	1.66734	1.83622	1.3251	1.39629
Strn4	1.28786	1.39205	1.48589	1.66667	1.38219	1.35442	1.83545	0.502474	0.758148
Pfdn4	2.02095	2.25113	2.09787	2.14837	1.73687	1.97629	1.8354	0.700481	0.956535
Ndfip2	1.82311	1.91098	2.24252	1.39431	1.64303	1.44539	1.83385	1.16211	1.06447
Eif3a	1.82714	1.48207	1.55514	1.81873	1.86595	1.90644	1.8316	1.90419	1.60207
Cfdp1	2.34331	1.92429	2.05083	1.94302	2.14322	2.39947	1.83067	1.24522	2.06287
Tprgl	1.98277	2.03169	1.88032	1.21344	1.36799	1.29933	1.83051	1.61433	1.75661
Nabp2	1.664	1.54896	1.37412	1.84984	1.57395	1.81068	1.82978	0.548136	1.07624
Polr2j	1.88006	1.73077	1.73876	2.35955	1.93468	2.17209	1.82875	1.08052	1.68555
Gprasp1	2.18487	1.35962	2.2025	1.77235	2.18675	2.32288	1.82765	1.053	0.725628
Ccl27a	1.72488	1.57934	2.30505	1.72975	2.17256	2.22876	1.82404	0.535267	0.51642
Tubb4b	2.22272	1.8771	2.58784	1.10211	1.47537	1.64283	1.82182	1.49692	2.95536
Eny2	1.42046	1.64443	1.79205	1.80725	1.5458	1.94251	1.82051	0.763129	2.31559
Ndufs2	1.69089	1.93505	1.7752	1.80975	1.63022	1.96181	1.81691	1.45896	1.79933
Dnaja2	1.92984	1.85751	1.7768	1.62544	1.67578	1.93604	1.81651	1.06008	1.745
Zfp207	1.30769	1.36111	1.27577	1.86445	1.66095	1.7549	1.81495	1.02895	1.361
Rab1a	1.73904	2.08366	1.99517	1.72727	1.62084	1.70733	1.81403	1.55903	1.62414
Slc24a5	1.59071	1.43623	1.57023	1.807	2.34308	2.06929	1.81264	0.617492	0.724027
Hnrnpd	1.52725	1.36421	1.61697	1.56181	1.65247	1.67992	1.81263	1.45653	2.06445
Prrc2b	1.59204	1.39178	1.60378	1.55531	1.83909	1.84269	1.81241	0.838342	0.934667
Arglu1	1.59026	1.37069	1.56842	1.49423	2.28763	1.83871	1.81179	1.28039	1.66636
Ube2m	3.13506	2.03986	3.18662	1.47771	1.77513	2.94839	1.81032	2.2896	1.68041
Polr2k	1.88841	1.81241	1.50988	2.19519	2.26994	2.31334	1.81003	0.765633	1.40802
Eri3	1.79996	1.42708	1.77428	1.84604	1.62286	2.06339	1.80405	0.67786	1.12074
Uqcrc2	1.7833	1.70526	1.92549	1.61484	1.74005	1.90597	1.80141	1.34415	1.34244
Ivns1abp	1.09188	1.2326	1.29702	1.15101	0.992523	0.945781	1.79917	2.40877	0.880267
Ndufb6	2.16824	1.99055	2.17922	1.98271	1.96164	2.14547	1.79836	1.08847	1.73647
Smarcd3	1.32681	1.27232	1.35372	1.57072	1.7297	2.35373	1.79776	0.307577	0.770705
Uchl3	1.99608	1.83538	2.02203	1.32268	1.51405	2.25432	1.7969	0.882629	1.12559
Mzt1	1.62965	1.63459	1.43807	1.64485	1.51422	1.35778	1.79576	0.601491	0.744975
Peli1	0.846913	1.14272	1.00307	1.62057	1.09626	0.987535	1.79153	0.988904	0.93654
Rad23b	1.68022	1.90671	1.7009	1.83306	1.34028	1.6466	1.78998	0.747969	1.4349
Pin1	2.14539	2.01329	2.08798	1.81674	1.61429	1.81088	1.78878	0.713439	1.40626
Arxes2	2.31947	1.74505	1.98407	1.6492	2.15556	2.2446	1.78768	0.7588	0.895104
Dgcr6	1.65925	1.67229	1.30947	1.59824	1.42953	1.34963	1.78646	0.457218	1.08479
Srp9	1.98472	1.86366	2.09431	2.02209	1.91743	1.87194	1.78615	2.00226	2.56432
Zfand6	0.961158	1.37569	1.09738	1.47025	1.29826	1.2255	1.78524	1.30922	1.24232
Stxbp1	2.37666	1.77935	2.81227	1.32579	1.7787	1.67825	1.78446	1.09732	0.744432
Cbx5	1.7539	1.55356	1.75037	1.75178	1.75463	2.09606	1.78257	0.70107	2.24249
Psmc6	1.51817	1.93394	1.69742	1.50547	1.41374	1.61783	1.7812	0.826526	1.38755
Fam69b	1.54358	1.4439	2.03391	1.079	1.46947	1.56339	1.78102	0.3912	0.587358
Brd2	1.27696	1.33463	1.25423	1.52469	1.40237	1.22866	1.77989	1.76067	1.36576
Higd1a	2.57262	2.51963	2.44416	1.71152	1.79511	1.81128	1.77659	1.06865	1.80508
Tox3	1.09404	0.709801	0.523617	1.04029	1.33039	0.960471	1.77641	0.137245	0.507907
Znrf1	1.4947	1.47459	1.65013	1.56196	1.21492	1.36687	1.77621	0.681125	0.724012
Atp1a3	2.12996	1.65642	3.45453	1.19778	1.79084	2.12769	1.77248	0.991981	0.4794
Fxyd7	2.56008	1.30788	6.11179	1.50827	0.850936	2.08739	1.77179	1.00779	0.387336
Rabac1	2.91043	2.47936	2.78114	1.7524	2.11847	2.17425	1.76909	1.94805	2.02013
Cox19	1.12794	1.57685	1.1832	1.31126	1.12122	1.04679	1.76746	0.383972	0.930064
Ociad1	1.7965	1.83448	2.12809	1.80423	1.67891	1.73644	1.76462	1.21463	1.49768
Med28	1.70417	1.86665	1.54048	2.16277	1.71329	1.50126	1.76325	0.804194	1.82717
Cdc37	1.29348	1.86799	1.21885	1.54446	1.47749	1.62743	1.75665	1.27869	1.82668
Lin7c	1.26916	1.42163	1.5584	1.26422	1.43563	1.34102	1.75065	0.671506	0.58468
Ctnnb1	1.13691	2.33377	1.29437	1.80068	1.16027	1.20267	1.74946	1.55285	2.68618
Luc7l2	1.65112	1.53684	1.55438	2.15968	2.67276	1.85838	1.74916	1.87638	1.72365
Psmc4	1.385	1.5498	1.4077	1.68882	1.39276	1.57092	1.74913	0.884648	1.46328
Wbp1	0.744627	1.60736	1.082	1.32792	0.670216	0.81606	1.74488	0.219292	0.987054
Midn	0.967356	1.33843	0.901614	1.47935	1.08806	1.02666	1.74375	0.585592	0.794636
Trappc2l	2.03012	1.85322	1.98456	2.31038	2.16485	2.35195	1.73866	1.25063	0.939901
Soga3	1.54236	1.53476	1.49919	1.45811	1.43956	1.42297	1.73808	0.405795	0.392934
Slc38a1	1.30703	1.3403	1.49752	1.71368	1.518	1.75724	1.7355	1.07783	0.881269
Mtch2	1.61679	1.95392	1.51708	1.56179	1.35732	0.979842	1.73518	0.775438	1.59347
Tsen34	2.15637	1.88765	1.8852	1.80704	1.87547	2.37017	1.73455	1.006	2.46636
Scg3	1.14208	1.67351	1.24505	1.07925	1.15509	0.946339	1.7248	0.287436	0.520787
Gng5	3.82085	2.92572	1.17908	3.72125	2.95474	1.22208	1.72397	5.53798	9.28499
Vps72	1.07984	1.32714	1.06826	1.69696	1.29293	1.42454	1.72242	0.458237	0.926609
Trim2	1.45927	1.9342	2.22302	1.36441	1.75889	1.31594	1.72229	0.633571	0.629282
Gnaq	1.646	1.45432	1.90468	1.82843	1.84779	1.92438	1.71859	1.05555	0.848771
Chchd1	2.04197	1.77245	1.65883	1.64519	1.78483	1.95364	1.71627	1.3044	1.60202
Alg2	1.61067	1.64714	2.15325	1.47399	1.85946	1.89663	1.71295	0.629086	0.63722
Sf3b1	1.40264	1.47082	1.51836	1.71697	2.15033	1.93762	1.71255	2.45907	1.44648
Gm2694	1.23436	1.15999	1.95573	0.159763	0.283373	0.387789	1.70932	0.0363672	0.416015
Sptbn1	2.20428	1.67165	2.64079	1.41625	2.09303	2.17388	1.70925	1.03955	2.11176
Camk2n2	2.45213	1.50569	4.44054	0.56588	0.989613	1.6935	1.70894	1.16186	0.397467
Tmem256	1.9762	2.10737	2.52336	1.5103	1.54815	1.22876	1.70797	1.86189	2.57049
0610012G03Rik	2.2031	1.93795	2.22402	1.6788	1.64613	1.68032	1.70448	1.70631	1.99107
Sars	1.64825	1.55513	1.66774	1.42575	1.47801	1.76808	1.70431	1.00174	0.96642
Tmem50a	1.81033	2.02262	1.6668	1.65813	1.92599	1.67837	1.70314	2.50094	1.70187
Rbbp6	1.47105	1.17713	1.34201	2.02028	2.08546	1.72546	1.70301	0.867743	1.11425
mt-Nd5	2.72365	1.93401	2.6275	1.83656	2.36918	2.84505	1.7	3.31377	2.3361
Gpi1	2.91242	3.15897	2.71396	2.0471	2.49439	1.86784	1.6997	2.83443	2.26939
Atp6v1b2	1.82983	1.66049	1.67925	1.53809	1.44484	1.91696	1.69927	1.44001	0.900561
Chl1	0.639488	0.856323	3.19554	0.481921	1.78303	1.47672	1.69864	0.585522	0.364758
Polr2f	2.21815	1.85966	1.909	2.81949	2.07773	2.82447	1.69863	0.945352	1.97923
Cuedc2	1.91205	1.91033	1.9602	1.84213	1.96324	2.14584	1.69593	1.43768	1.68978
Ttc9b	2.51876	2.31561	3.82492	1.91532	2.33124	2.22444	1.69584	0.818691	0.465037
Eif3c	1.40085	1.44405	1.52626	1.28066	1.32144	1.42576	1.69563	1.3382	1.42669
Ier3ip1	2.05191	2.25845	2.1448	2.23496	2.46106	1.6142	1.69466	0.864812	1.4317
Scd2	2.38584	2.28514	2.53483	2.08631	1.59843	1.37361	1.693	1.41951	2.98978
Gde1	1.6912	1.54826	2.15142	1.54084	1.39867	1.59146	1.69249	1.00042	1.09845
Atp6ap2	1.35162	1.31847	2.00684	1.17077	1.1538	1.52013	1.69248	2.22302	0.750232
Psenen	1.96213	1.92558	1.5142	2.09107	1.92002	1.61656	1.69053	1.77317	1.67163
Arpc5l	2.22972	1.64094	1.89407	2.04126	1.75259	2.08765	1.68964	1.67912	1.385
Tm2d2	1.68689	1.67656	1.4662	1.97172	1.48051	1.79046	1.68948	1.25664	1.56881
Flywch1	1.41339	1.59755	1.12158	1.21013	1.06764	1.14388	1.68918	0.434299	0.758812
Ostc	1.71563	1.48479	1.25325	1.43939	1.48681	1.36164	1.68911	1.53113	3.45649
Tpi1	3.60376	3.70342	2.60921	2.35278	2.09903	2.07868	1.68829	2.14468	3.12189
Tmem130	2.07431	1.47937	2.1963	1.72382	2.15694	2.53602	1.68817	1.06024	0.348462
Krtcap2	1.88169	1.92815	1.83611	1.75444	1.98106	1.87417	1.68733	1.6791	3.52368
Ap1s1	2.10172	1.88916	1.78113	1.84274	1.46143	1.63665	1.68601	0.943485	1.15732
Prnp	1.72368	1.55538	1.87431	1.73675	2.39828	2.16253	1.68443	0.786136	1.05968
Pou3f1	0.091814	0.291141	0.102892	0.265276	0.0598044	0.0469854	1.68178	0.0731476	0.163164
Ndufb3	2.34988	1.99699	2.2173	2.12879	2.28899	2.48048	1.6808	1.42246	1.5819
Top2b	1.13287	1.28832	1.46631	1.45775	1.51709	1.48148	1.68042	0.758811	0.982679
Prkacb	2.30129	1.33679	2.00492	1.90319	2.57761	2.35814	1.67915	1.24588	0.733169
Lsm4	1.86614	1.85626	1.68345	2.02377	1.81074	1.65983	1.67866	1.21267	2.0663
Snrpc	1.60332	1.5797	1.333	2.10378	2.00881	1.96618	1.67618	0.679152	1.84483
Pbrm1	1.68602	1.7229	1.41302	2.07523	1.85168	1.66077	1.67589	0.969253	1.56875
Hsp90b1	2.15207	1.61368	1.83955	1.43086	2.18124	2.23804	1.67374	4.25342	3.9547
Hpcal1	1.32358	1.47525	2.14122	0.546891	0.429295	0.898533	1.67298	0.572041	0.80071
Phip	1.47051	1.52333	1.33204	3.16486	2.20428	1.68496	1.67199	0.979675	1.34728
Golga7	1.29702	1.61673	1.21187	1.49789	1.02072	1.27721	1.66972	0.772276	1.2643
Rpl36al	2.86538	2.27498	2.0852	2.89051	3.20038	2.5104	1.66803	2.47566	2.56786
Rbmx	0.910872	1.40132	0.980762	1.01516	0.974274	0.668258	1.66742	0.25946	0.869342
Ap3s1	1.81361	2.62555	1.96168	1.51276	1.30007	1.28601	1.66703	0.6716	1.99126
Sfxn1	1.92455	1.4414	1.55394	1.28116	1.55897	1.66327	1.66593	0.558993	0.967094
Zfp422	0.794602	1.13241	0.755283	1.01154	0.799553	0.648698	1.66555	0.376592	1.11133
Nudt21	1.54548	1.83022	1.48938	1.76132	1.14675	1.18365	1.66432	0.637283	2.24792
Atrx	1.4753	1.44995	2.13241	1.65941	2.24339	2.28251	1.66378	1.60337	1.17725
Gdap1l1	1.2681	1.46872	1.36173	1.54379	1.25291	1.61658	1.663	0.259428	0.341841
Srsf1	1.50532	1.69594	1.40642	1.82873	1.93275	1.57702	1.66194	0.763849	1.72851
Cbr1	1.06652	1.44382	1.47948	1.4453	1.38036	1.3834	1.6583	0.786479	0.709992
Nrn1	0.0957146	2.21331	1.57356	0.0402111	0.0577175	0.0674431	1.65792	0.0744018	0.204911
Cwc15	1.63407	1.53834	1.35975	1.87446	1.59425	1.55781	1.65436	1.27695	1.68414
Rgmb	0.570669	1.95099	1.2557	0.604414	0.584454	0.589892	1.65363	0.574853	0.724562
Csnk2b	1.5685	1.9083	1.67384	1.7233	1.71409	1.69783	1.65217	1.04398	1.68499
Ndufs7	2.01668	1.70856	2.074	2.12621	2.11283	2.12503	1.65142	1.80487	1.82467
Ubxn6	1.32137	1.49809	1.36027	1.32191	1.30024	1.1885	1.65046	0.762394	0.967257
Dnajc8	1.31839	1.50219	1.40963	1.6118	1.45007	1.69063	1.64799	1.12492	1.23221
Emc6	1.97726	1.81764	2.08708	1.64056	1.58131	1.99931	1.64721	1.2854	1.38097
Mrps21	1.93237	1.9675	1.62914	1.91472	2.08321	1.89676	1.6467	1.40715	1.92202
Polr3k	1.2547	1.45266	1.13562	1.00656	0.960735	0.992538	1.64602	0.401711	1.08856
Mex3a	0.845207	1.31079	0.828852	1.43138	0.987052	1.03095	1.64504	0.19529	0.954207
Ntng1	0.635885	0.580723	2.12579	0.259894	0.436198	0.807723	1.64498	0.318748	0.185765
Tdg	1.09459	1.40549	0.958946	1.64836	1.18962	1.33651	1.64435	0.288091	0.8566
Nbdy	2.84692	1.97981	2.45486	2.02786	2.28663	2.55433	1.64142	1.37995	1.27048
Mycbp2	2.22394	1.53138	2.27751	1.54011	2.38713	2.10965	1.64017	2.20839	0.953517
AW551984	1.41791	0.752081	1.62591	1.09934	1.95157	1.64115	1.64005	0.62456	0.376755
Pdia3	2.14983	1.77213	1.4799	1.74817	1.71222	1.73048	1.63976	3.0163	3.77153
Pgk1	2.13779	2.69245	2.37422	1.46551	1.48847	1.29526	1.63771	1.97001	2.56007
Cxadr	0.942005	1.17715	2.49819	1.07675	1.15274	1.71439	1.63462	0.35496	0.62572
Psmd2	1.26118	1.32112	1.25662	1.13184	1.06921	1.23189	1.63445	0.97575	1.23297
Ube2l3	1.77671	1.78131	1.5389	1.59623	1.40158	1.58796	1.63254	1.5419	1.97515
Lamtor2	2.2126	1.74587	1.79695	1.80147	1.96633	2.05505	1.63035	1.77961	2.08272
Ptbp2	1.26045	1.52953	1.47692	1.33211	1.61365	1.41786	1.62774	0.494137	0.68922
Ndufb4	2.20037	2.23099	2.2751	2.04624	2.10757	2.54543	1.62665	1.46815	2.05409
1500011B03Rik	1.99156	1.58998	1.82743	2.01573	1.92256	1.59207	1.62433	0.531232	0.52741
Mob4	1.5606	1.68134	1.70655	1.91253	1.48127	1.62002	1.62223	1.10856	1.20997
Chd4	1.36147	1.63831	1.12991	1.98718	1.89163	1.82906	1.62167	1.61962	1.39548
Maz	1.48757	1.4912	1.50281	1.22805	1.42441	1.56519	1.615	1.17267	1.23153
Atox1	1.99756	2.19612	1.59085	1.61376	1.4515	1.32828	1.61497	3.78072	2.56657
Clip3	1.1096	1.2803	1.42469	1.22611	1.12042	1.08065	1.61408	0.332377	0.771769
Ift20	1.35362	1.12923	1.34558	1.31508	1.21404	1.40943	1.61396	0.807195	1.15833
Tra2a	1.10888	1.40264	1.18756	1.51946	1.58796	1.21438	1.61242	0.911671	1.35999
Adcyap1	0.0983779	0.162395	0.728355	0.0107865	0.0349542	0.0370873	1.61142	0.0951013	0.0225494
Ndufa10	1.53233	1.72929	1.77246	1.46903	1.38655	1.92673	1.60975	1.09954	1.78669
Hspa5	1.8835	1.54814	1.57546	1.70158	2.0976	1.69063	1.60957	4.33543	3.9343
Commd3	1.10482	1.10468	1.33719	1.31785	1.41909	1.75196	1.60645	1.26033	1.00719
Mrpl30	1.85901	1.80299	1.82948	1.88812	1.80495	1.94656	1.60539	1.45015	1.93368
Ptges3	2.3615	1.7995	2.15029	1.7973	2.06451	2.11305	1.60485	1.69545	1.74689
Elof1	1.38509	1.4758	1.8868	1.53127	1.54571	1.72161	1.60412	0.86798	1.56681
Rhoa	1.80202	1.69028	1.21807	1.72248	1.78639	1.61875	1.60371	5.29347	3.37487
Dcun1d5	1.81719	1.6809	1.53234	1.91637	1.39396	1.61061	1.60188	1.04573	1.95757
Snx3	1.86934	1.84773	2.59134	1.18125	1.44289	1.3879	1.59943	3.36124	3.5084
Lsm6	1.42396	1.56143	1.42015	1.29984	1.29304	1.28084	1.59718	1.34253	2.31941
Esd	1.90433	1.82472	1.3661	1.75107	2.01663	2.00765	1.596	1.6972	1.95322
Supt4a	1.29815	1.50807	1.22725	1.56185	1.50521	1.52235	1.59598	1.73141	1.26734
Nipsnap3b	1.63671	1.9098	1.78528	1.19922	1.16678	1.41164	1.59577	0.912929	0.666672
Hp1bp3	1.12164	1.21427	1.06509	1.66589	1.59789	1.54796	1.5951	0.834959	0.78825
Actr1a	1.27362	1.55839	1.46826	1.20024	1.08535	1.21422	1.59458	0.525601	0.73718
Snrpa	1.1438	1.3388	1.13075	1.48716	1.37505	1.41691	1.59443	0.721759	1.41776
Med10	1.35209	1.40408	1.13891	1.42912	1.10794	0.988446	1.59314	0.811338	1.14831
1110008F13Rik	1.30908	1.63984	1.72871	0.985551	0.865312	1.10885	1.59235	2.0028	2.1136
Arxes1	1.89901	1.24314	2.06832	1.13368	1.86131	1.8588	1.59169	0.628712	0.626513
Bub3	0.955665	1.17526	0.930984	1.0364	1.20807	2.1741	1.58813	0.899537	1.54929
Enah	1.43899	1.64117	1.64994	1.78168	2.01655	1.55782	1.58683	0.470906	1.18819
Rex1bd	1.7813	1.5312	1.80252	1.30479	1.4878	1.76447	1.58651	1.23119	1.34279
Gprasp2	2.01901	1.17298	1.5652	2.09078	2.33185	2.71382	1.5861	0.863172	0.4385
Adgrl1	1.30484	1.09504	1.93054	1.19743	1.42143	1.51752	1.58565	0.684188	0.818223
Bag1	2.0252	1.99824	1.86872	1.46934	1.45371	1.3846	1.58552	1.68796	2.10699
Pja2	1.8106	1.41345	1.98618	1.27733	1.67059	1.85637	1.58471	1.22803	0.862033
Cnpy2	1.61481	1.39008	1.22444	1.92757	1.89879	1.72093	1.5843	1.07007	2.66448
Ndufs3	1.66096	1.64859	1.65839	1.8763	1.56628	1.99649	1.58339	1.40857	1.68577
Pgls	2.47023	2.42966	2.52237	2.37217	1.85588	2.34367	1.5784	2.68406	2.89003
Fibp	0.835708	1.00748	1.11472	1.4847	1.34054	1.24395	1.5777	0.603785	1.01612
2900011O08Rik	1.69556	1.45983	2.30266	0.938865	0.961247	1.48127	1.57764	0.458443	0.295358
Txnl1	1.97218	1.60791	1.78147	1.80139	1.5266	2.09372	1.57688	1.23623	2.247
Uba52	1.86774	1.70997	1.35307	2.59402	2.85672	2.39093	1.57448	2.42359	1.95286
Smc6	1.28365	0.949403	0.908145	1.31842	1.19237	1.27345	1.57322	0.777092	1.45076
Meaf6	1.35579	1.63764	1.74845	1.49716	1.3358	1.60715	1.57206	0.688455	0.785542
Tmem35a	0.427845	1.36578	1.99453	0.239873	2.17043	1.64881	1.5708	0.183998	0.252783
Rbmxl1	1.25896	1.23118	1.4524	1.52245	1.48545	1.9005	1.56871	0.943372	1.18342
Acot7	2.76055	2.856	2.57251	1.33886	1.54098	1.94136	1.56232	0.729038	0.711584
Polr2i	1.50094	1.46028	1.45312	1.7692	1.77584	1.48659	1.56189	0.826119	1.32883
Cltb	1.69706	1.24263	1.63138	1.3294	1.5676	1.76875	1.55987	0.871798	0.590901
Kdm2b	0.769812	1.00505	1.13625	1.0401	0.835069	1.06696	1.55976	0.96684	0.614367
Samd10	1.35978	1.58305	1.73123	0.999757	0.968105	1.03483	1.55925	0.279816	0.411146
Kif21a	1.13057	1.4413	1.09863	0.689397	0.971948	1.44279	1.5571	0.406691	0.396222
Stard3nl	2.45744	2.11372	1.76341	1.83025	1.71201	1.98518	1.55579	1.45861	1.49613
Mcts1	1.43055	1.37193	1.48828	1.43767	1.33117	1.78097	1.55423	0.78676	0.830433
Txn2	1.79522	1.74885	1.45843	1.5589	1.45679	1.29139	1.55224	0.99925	2.17103
Npepps	1.32143	1.36605	1.46142	1.3351	1.27293	1.15138	1.55114	0.609047	0.757196
Tspan7	1.73201	1.08126	1.66604	1.19346	1.03454	2.65011	1.54808	0.996559	1.18756
Retreg2	1.47312	1.38917	1.61522	1.37566	1.24494	1.568	1.54677	0.834757	0.586229
B230219D22Rik	1.38011	1.37656	1.59303	1.67204	1.69692	1.67131	1.54675	1.00719	0.934409
Aurkaip1	1.67387	1.58197	1.42809	1.74534	1.56578	1.6994	1.54409	1.0179	1.5144
Tulp4	1.54393	1.38361	1.54278	1.86229	1.74088	1.81443	1.54282	1.01471	0.72733
Pfdn6	1.75952	1.78129	1.48983	1.57777	1.64228	1.80314	1.5424	0.634981	1.58522
Dpysl4	1.35869	1.72163	1.09562	1.21498	1.17488	1.18282	1.54198	0.208006	0.542122
Gm16286	1.77991	1.62463	1.41456	1.61579	1.63533	1.70427	1.53929	1.30938	1.38745
Pcmt1	2.03006	1.91626	1.87496	1.64769	1.6136	1.64845	1.53896	1.09389	1.26041
Pam16	2.135	1.73689	1.65546	2.23837	1.94429	2.1502	1.53775	1.06749	1.09396
Snap25	2.55974	2.93591	2.34784	2.23385	1.81789	1.47902	1.53627	1.09901	0.622705
Tmem132a	0.900594	1.18464	1.48718	0.822556	1.02897	1.15455	1.53562	0.436333	0.592055
Pabpn1	1.01457	0.976242	1.13591	1.25871	1.75799	1.37981	1.53535	0.502911	0.734627
Pnrc1	0.875395	0.820995	0.607447	1.82405	0.920144	0.881357	1.53522	3.17922	1.28417
Tmem57	0.867005	1.11281	1.1021	1.09704	0.992074	1.13889	1.53356	0.365683	0.516099
Acvr2b	0.753836	1.22033	0.758561	1.20944	1.01447	0.831257	1.53286	0.147122	0.552442
Spop	1.37122	1.37017	1.5259	1.2205	1.75543	1.43943	1.53234	0.896774	1.02945
Guk1	2.3631	1.84383	2.30644	1.356	1.559	1.75823	1.53199	0.839154	1.03522
Btbd1	1.31505	1.36708	1.25549	1.50189	1.34099	1.03155	1.53169	0.848508	1.10474
Strbp	1.30262	1.52515	1.64704	1.24338	1.52794	1.56011	1.53123	0.428459	0.605656
Fam49b	1.93637	1.71101	1.74823	1.58463	1.27625	1.35639	1.53089	3.84717	1.27387
Cask	1.40987	1.26963	1.77902	0.846111	1.62155	1.54949	1.5288	0.507529	0.645231
Nell2	1.85136	0.850381	1.08444	0.424606	1.0318	0.713358	1.52765	0.194255	0.404024
Psmd6	1.27133	1.68343	1.34591	1.04995	1.1061	1.06126	1.52765	0.820298	1.296
Ube2k	1.40434	1.51381	1.71528	1.37424	1.31976	1.39678	1.52607	0.883128	1.42889
Bod1	1.45166	1.22031	1.41622	1.37343	1.46987	1.57328	1.52565	0.440064	0.904082
Epha5	0.633853	0.922163	3.22311	0.273719	0.533635	0.370688	1.52527	0.373248	0.20594
Smim10l1	1.307	1.47728	1.38812	1.58665	1.47176	1.46679	1.52385	0.820943	1.26597
Grb2	1.33683	1.51543	1.32855	1.39538	1.48682	1.44819	1.52005	1.38922	0.917334
Tmem167	1.49849	1.65294	1.45667	1.45503	1.01981	1.06017	1.51716	1.11474	3.00391
Snn	0.747226	1.18317	1.25588	0.578262	0.57547	0.438091	1.51649	1.58544	0.736496
Sncb	2.10755	1.55401	5.65979	0.610877	0.63321	1.25626	1.51392	0.893638	0.254151
Ptp4a2	1.60216	1.47236	1.47758	1.29676	1.22088	1.18663	1.51077	2.4545	1.67981
Fam220a	1.1433	1.3094	1.38545	1.08773	1.01952	1.32745	1.50779	0.574521	0.724749
Dner	1.70666	1.72073	4.16537	0.932289	1.8546	1.47513	1.50758	0.796426	0.62341
Kdm5b	0.822424	0.989855	0.916525	1.30429	1.21047	1.08393	1.50681	0.334344	0.802686
Cope	1.13611	1.46975	1.38988	1.33497	1.21236	1.33942	1.5064	1.32988	1.50624
Rab5a	1.20784	1.52672	1.25935	1.44061	1.24212	0.948021	1.50582	0.70218	0.984227
Mrps24	1.71446	1.39291	1.6829	1.54496	1.3818	1.50824	1.50489	1.17918	1.74316
Ubxn4	1.42373	1.35404	1.18706	1.5658	1.58649	1.30861	1.50307	1.01702	1.24636
Celf6	1.61024	1.2338	1.20091	1.97489	1.89251	1.89831	1.5029	0.547292	0.264587
Pcdh17	1.83773	1.14741	3.56033	1.48128	1.41816	1.90286	1.50252	1.18361	0.533766
Amn1	1.06801	1.21033	1.04313	1.28329	1.22704	1.3476	1.50224	0.219019	0.512806
Pdrg1	1.03949	1.19086	1.48789	1.12975	1.06169	1.29374	1.50134	0.552649	0.7294
Mtx2	1.34112	1.45624	1.7822	1.17984	1.01766	1.41271	1.50095	0.63269	1.09962
Bclaf1	1.33824	1.22399	1.38066	1.47116	1.6468	1.6478	1.50057	1.30633	1.37048
Trappc1	1.29424	1.81071	1.32967	1.39909	1.2831	1.07046	1.49879	0.772577	1.37877
Anapc11	1.93009	1.96981	1.85829	1.43211	1.93383	2.19894	1.49702	1.25096	2.56596
Gpm6b	1.08363	1.38268	0.669819	0.87911	0.937615	1.24492	1.49645	0.572714	1.1548
Mgst3	2.2421	2.38769	2.95006	0.898515	1.24144	1.22568	1.49585	0.711072	0.829629
Ncs1	1.10674	1.39382	1.38394	1.01288	0.961418	1.16246	1.49324	0.374207	0.589147
Nipsnap1	1.03942	1.18754	1.19939	0.927569	0.895087	0.976589	1.49317	0.156934	0.377074
Map7d1	1.19572	1.37265	1.30562	1.22659	1.15423	1.14879	1.493	0.846221	1.28636
Itfg1	1.22485	1.07974	1.64737	0.983893	1.16295	1.29601	1.4922	0.808908	0.714184
Vat1	2.87062	2.60408	1.91424	1.65075	1.311	1.80146	1.49112	1.12078	1.081
Capns1	1.96028	2.00809	1.46161	1.58931	1.3358	1.33949	1.48969	1.52195	2.48515
Tpm3	1.90738	1.53283	1.4085	1.67023	1.33412	1.85991	1.48916	3.94748	2.16203
Ube2r2	1.7871	1.67631	1.4274	1.69269	1.58213	1.61937	1.48853	1.36942	1.67699
Pea15a	3.25374	1.22453	1.79884	3.06162	2.54622	2.25798	1.48799	1.29428	1.90391
Sarnp	1.43334	1.27682	1.43248	1.64022	1.5569	1.61356	1.48677	0.962174	1.2283
Tmx4	1.69522	1.14093	1.67662	1.92782	2.84396	2.20091	1.48554	1.18823	0.558414
H13	1.37117	1.55482	1.38783	1.52875	1.32197	1.36733	1.48369	0.7387	1.2186
Ppp1r11	1.56074	1.58622	1.43799	1.67291	1.45759	1.48918	1.48142	0.757281	1.00558
Canx	2.06769	1.54457	1.94593	1.39981	1.66553	1.91465	1.481	2.55478	2.34577
Smarcc1	1.26775	1.2724	0.864555	1.57761	1.66742	1.46359	1.47873	0.499347	1.0907
4833439L19Rik	1.31156	1.69207	0.985994	1.56137	1.06511	0.857629	1.47868	0.524139	0.780935
Mea1	1.74218	1.702	1.81507	1.69971	1.34759	1.31455	1.4785	0.609442	1.25066
Apc2	0.830636	1.00541	0.955946	1.20386	0.942984	1.34175	1.47816	0.267202	0.360686
Rbbp4	0.940854	1.08788	0.977901	1.69405	1.20501	1.46367	1.47759	1.33562	1.31284
Abhd8	1.58115	1.54826	1.9078	1.72452	1.33605	1.63357	1.47713	0.528835	0.856634
Cnot7	1.36833	1.34644	1.09386	1.93166	1.65693	1.56508	1.477	0.6486	0.716554
Arhgdig	3.27346	1.55584	3.30099	0.694245	1.14653	1.91498	1.47658	1.15798	0.49159
March5	1.15458	1.38296	1.31585	1.44963	0.905164	0.886468	1.47422	0.836727	1.28033
Cox14	1.58038	1.59277	1.65286	1.90149	1.63114	1.28115	1.47393	1.18941	1.23146
Acp1	1.87416	1.60953	1.86688	1.88275	1.98804	1.96771	1.47317	1.02599	1.69229
Auts2	0.873761	1.2796	3.08827	1.12771	1.33362	1.24069	1.47219	0.315296	1.37136
Chmp2a	1.90299	1.71924	1.56228	2.11988	1.99417	1.99314	1.46561	1.46289	1.50214
Tax1bp3	0.888176	1.52074	0.779629	1.16172	0.552208	0.916114	1.46473	0.742755	2.02305
Fam216a	1.46925	1.36267	1.58506	2.08008	1.93559	1.89773	1.46469	0.347286	0.637977
Oxct1	1.62126	1.32794	1.96425	0.900327	1.39942	1.36111	1.46246	1.4576	1.70629
Slc25a11	1.34072	1.53759	1.43215	1.45435	1.17049	1.27987	1.46162	1.53492	1.3708
Sqle	1.53517	1.82533	1.56265	1.05985	0.918593	1.08514	1.46028	0.398329	1.23716
Bbip1	1.98839	1.77175	1.7097	1.52358	1.62068	1.5204	1.46003	0.889435	1.35879
Dync1li1	1.33444	1.40313	1.17351	1.09941	1.09208	1.18046	1.45983	0.560797	0.643154
Spin1	1.26972	1.07877	1.44346	1.54254	1.39838	1.44789	1.45869	0.568991	0.914762
Gnaz	1.56628	1.31337	1.91978	1.5356	1.69403	2.00666	1.45857	0.482839	0.38433
Txndc17	2.61585	2.33584	1.53276	1.83499	1.82989	1.78123	1.4574	1.71989	2.46284
Mapk1	1.29721	1.27185	1.32433	1.40702	1.3995	1.30591	1.45717	0.79108	0.881252
Txndc9	1.16258	1.44486	1.21187	1.37406	1.4044	1.37231	1.45676	0.792631	1.48922
Ube2j2	1.44225	1.36809	1.28954	1.53871	1.25511	1.42469	1.45345	0.797843	1.16397
Glrx5	1.98819	1.5616	1.91269	1.63145	1.48104	1.93241	1.45304	1.18003	1.65101
Ppp3r1	1.51087	1.23412	1.66261	1.46872	1.40005	1.29567	1.45268	0.718685	0.631924
Acly	1.23467	1.75635	1.25975	1.04957	1.05077	0.997911	1.45199	0.81329	0.789783
Coro1c	1.62417	1.50168	1.0117	1.37266	0.947237	0.876306	1.45176	0.464169	0.912469
Tsc22d3	0.888566	1.40615	0.840202	0.992775	1.09788	1.15671	1.45161	1.11627	0.905177
Psmd13	1.2632	1.42488	1.32773	1.30256	1.22857	1.54468	1.45116	1.05102	1.19853
Psmd11	1.26114	1.26465	1.09544	1.28106	1.21256	1.04972	1.45083	0.872413	1.12345
Cyb5a	2.34381	2.35732	1.84541	1.65616	1.8224	2.43268	1.44883	2.53153	2.4492
Dmrtb1	0.0552965	0.999296	0.319288	0.0937717	0.159108	0.129647	1.44841	0.0178412	0.0949343
Ubxn1	1.99843	1.8884	1.33236	2.3092	1.73201	2.06403	1.44729	2.06522	1.77721
Bhlhb9	1.23402	1.01711	1.07052	1.6038	1.15185	1.15036	1.44665	0.342558	0.635375
Phyhipl	1.01805	1.02919	1.39659	0.888157	0.943992	1.11343	1.44585	0.425657	0.542415
Arf2	0.696484	0.88439	1.02916	0.885587	0.839028	1.13326	1.44457	0.585868	0.383364
Mrpl23	1.41946	1.554	1.35111	1.38446	1.28543	1.22017	1.44418	1.18507	1.44709
Aco2	1.15241	1.42911	1.4725	1.45849	1.09973	1.18977	1.44393	0.748969	1.06249
Cdv3	1.25275	1.18849	1.12363	1.11858	0.971318	0.973444	1.44392	0.647525	1.68312
Ythdf2	0.87995	1.15179	0.836621	1.02212	0.932532	0.747529	1.44385	0.866624	0.850659
Bcl2l1	0.742636	1.01532	0.790548	1.18188	0.8185	0.842465	1.44175	0.527621	0.550414
Scn3a	0.817833	0.991975	1.55434	1.2231	1.5366	1.47244	1.44169	0.349332	0.24102
Nexmif	0.818487	0.329297	1.22949	0.985841	0.49049	0.941395	1.43991	0.288314	0.161106
Serpini1	0.310161	0.613144	1.26912	0.179287	0.351632	0.439953	1.4379	0.135718	0.14414
Ppm1a	1.9996	1.41924	1.86689	1.57403	1.76956	1.62626	1.437	1.0534	0.955761
Casp3	0.92707	1.34368	1.21954	0.894991	1.0847	1.46065	1.43535	0.457903	0.730702
Tspan6	1.33174	1.31895	1.56956	1.32344	1.71954	1.69444	1.43514	0.401869	1.40662
Phf5a	1.40006	1.60784	1.50651	1.45525	1.54734	1.63335	1.43498	1.00216	1.75827
Chmp4b	1.55913	1.19063	1.29549	2.10389	1.39294	1.57928	1.43423	1.325	2.0212
Rbm5	1.08633	1.06989	1.17019	1.38067	1.49699	1.30138	1.433	1.16181	0.972527
BC005537	1.17064	1.29718	1.12383	1.23067	1.25148	0.98167	1.43129	1.0925	1.02917
Zmat2	1.20317	1.35105	1.04189	1.27239	1.15885	1.13354	1.43036	0.72537	1.26454
Rwdd1	1.83839	1.60956	1.62456	1.48921	1.34083	1.53294	1.42945	0.771688	2.02467
Prkar1b	1.87428	1.26731	1.84288	1.07101	1.34057	1.67052	1.42853	0.918454	0.387419
Msi1	0.680933	1.16228	0.736349	1.21539	0.897963	0.65997	1.42818	0.184846	0.367351
Npc2	1.49408	2.06017	0.954624	1.78071	1.37455	1.18548	1.42816	7.50781	3.99999
Ppp1r2	1.52487	1.738	1.44064	1.50458	1.45015	1.44301	1.4279	0.875098	1.56935
Psmc1	1.34628	1.34969	1.12471	1.19406	1.12553	1.14906	1.42711	0.755404	1.06317
Sptssa	1.95566	2.02527	1.27121	1.60189	1.97667	1.80327	1.42699	2.0131	2.01481
Manf	1.9691	1.54848	1.36902	1.62484	1.71676	1.45404	1.4261	1.7982	2.81781
Kif3a	1.38784	1.29145	1.76451	0.85819	1.2343	1.62919	1.42223	0.576721	0.627837
Vps29	1.8898	1.80928	1.96261	1.46914	1.27725	1.64159	1.42191	1.60087	1.33544
Mrps17	1.70039	1.35788	1.61001	1.66284	1.63394	1.65552	1.42106	1.10218	1.43395
Uba2	0.955446	1.11734	0.980018	1.08286	1.13863	1.16481	1.41927	1.07201	1.0543
Polb	1.01759	1.25614	1.19632	1.14697	1.08764	1.37977	1.41916	0.640845	0.549803
Plppr1	0.206533	1.00477	1.1935	0.213617	0.254623	0.704785	1.41826	0.095837	0.167239
Dusp26	1.89424	2.11598	2.41714	1.4909	2.64723	2.03668	1.41818	0.683583	0.374895
Ogt	0.94553	1.1138	1.16876	1.12895	1.34397	0.890584	1.41779	0.564248	0.880305
Rit2	1.6486	0.74534	1.63569	1.15664	2.03379	1.82423	1.41639	0.641333	0.205326
Hes6	0.834895	1.11135	0.907893	1.17545	0.50834	0.927454	1.41604	0.390898	0.512841
AC149090.1	0.852769	0.792966	1.61558	0.943233	1.84498	1.25881	1.41573	0.998625	0.397445
Mpc1	1.70222	1.53903	3.18295	1.03777	1.16818	1.73202	1.41561	3.57191	1.33364
Aamp	1.55241	1.29893	1.14571	1.84634	1.60206	1.60596	1.41448	1.75878	1.58556
Ccni	0.969077	1.37305	1.10712	1.28557	0.995543	0.864666	1.41326	1.24269	1.09667
Hnrnpl	1.20364	1.13497	1.01891	1.27532	1.32281	1.1527	1.41316	1.20335	1.15495
Cnih1	1.41691	1.62661	1.27616	1.4423	1.21434	1.27907	1.41246	0.811938	1.81149
Eif3l	1.26967	1.41228	1.11833	1.14666	1.16403	1.3558	1.41064	0.970568	1.59578
G3bp1	1.54222	1.33209	1.23873	1.84507	1.43351	1.53083	1.41061	1.63319	2.20132
Smarcc2	1.0276	1.06478	1.31071	1.25237	1.45932	1.32484	1.41059	0.552094	0.679107
Gps1	1.15018	1.24531	1.55074	1.07178	1.08111	1.21027	1.40982	0.842128	1.17416
Arl1	1.37745	1.42929	1.46948	1.15423	1.33423	1.577	1.40775	1.5382	1.76928
Actr10	1.17219	1.37355	1.28707	1.15541	1.3046	1.18944	1.40697	0.713772	1.0106
Vangl2	0.734591	0.949106	0.862424	1.10379	0.964119	0.848983	1.40672	0.391757	0.566399
Prrc2c	1.6175	1.18873	1.25546	1.67672	2.25209	2.11451	1.40609	1.44879	1.56495
Hnrnpm	0.97287	1.12658	0.989558	1.26619	1.16362	1.12372	1.40592	0.977108	1.66437
Tmem163	0.38916	1.36282	1.5215	0.126628	1.33491	0.174973	1.40578	0.0878485	0.225912
Snrpb2	1.2521	1.37633	1.01402	1.73582	1.63009	1.26074	1.40552	0.875871	1.52129
Meis3	1.38056	1.87275	0.905003	1.42818	1.11133	1.05127	1.40469	0.373394	0.67599
Tpgs2	1.19634	1.44308	1.51964	1.11117	0.874532	1.09762	1.40401	0.403417	0.88039
Mpc2	2.14766	1.84062	2.63934	1.71166	1.91187	2.01086	1.40347	1.34432	1.74896
Bud31	1.21876	1.47736	1.01575	1.61472	1.42669	1.28831	1.40118	0.787332	1.36444
Copz1	0.957724	1.25003	0.847033	1.28308	0.95692	0.967829	1.40004	0.762836	1.2296
Pmvk	1.93962	1.71993	1.76918	1.38875	1.84464	1.69004	1.39893	0.549395	1.02392
Macf1	1.31079	1.08369	1.58001	1.49972	1.9904	2.00266	1.39872	2.01636	1.3811
Tmem30a	1.42423	1.32564	1.34963	1.29056	1.22714	1.14093	1.39483	1.17074	0.722558
Mrpl12	1.86774	1.63371	1.89249	1.39714	1.46147	1.72823	1.39483	1.15889	1.43393
Mrpl18	1.02234	1.29767	1.34964	1.00861	0.824077	0.980104	1.39343	0.732093	1.84405
Med22	0.778006	1.11555	0.792855	1.15038	0.81304	0.817227	1.393	0.375312	0.401483
Apex1	1.04477	1.15696	0.94694	1.28657	1.03037	1.32435	1.39141	0.790614	1.05461
Tspyl4	1.85816	1.54668	1.86568	1.49036	1.92181	2.11769	1.3907	0.661284	0.491331
2210016L21Rik	1.74001	1.24251	1.48595	1.26932	1.54612	2.03774	1.38892	0.910003	0.714984
Tspyl1	1.10918	1.15969	1.03658	1.10827	1.22622	1.02772	1.38828	0.704847	0.582274
Pdia6	1.29588	1.26547	1.1579	1.0009	1.08876	1.05744	1.38691	2.07128	3.76485
Dpy30	1.41255	1.45164	1.8527	1.38926	1.49478	1.11255	1.38639	0.62153	1.38357
Aplp2	1.219	1.22018	2.15059	1.029	1.09916	1.50454	1.3852	1.03045	1.31815
Nucks1	1.26251	1.47531	1.57383	1.00281	1.17717	1.115	1.38414	0.97386	2.17105
Nptn	1.94018	1.28256	2.41744	1.06111	1.67675	1.60402	1.38281	2.77543	1.234
Tmem147	1.68304	1.54234	1.66788	1.65286	1.33199	1.44158	1.38235	0.866389	1.69847
Rangap1	1.30105	1.24491	1.41958	1.16399	1.15896	1.51124	1.3819	0.631197	0.922632
Elmo1	0.393323	1.0384	1.54834	0.325039	0.432227	0.316857	1.38094	1.83157	0.243066
Adprh	1.35217	1.55846	1.31115	1.29186	1.3486	1.36679	1.38005	1.00587	1.49502
Ing4	0.674501	0.971085	0.775989	1.2109	0.919833	1.14909	1.37374	0.631501	0.611088
Sh3glb1	1.68519	1.63969	1.47108	1.39071	1.35439	1.1493	1.37354	4.05755	1.82076
Pnn	1.19369	1.04984	1.2	1.46588	1.85031	1.85072	1.37349	1.57391	1.38452
Idh2	0.754233	0.976622	0.682835	1.2926	0.891794	0.931917	1.37344	2.19613	2.30139
Denr	1.91215	1.73379	1.69667	1.74519	1.74767	1.70407	1.37241	1.33646	1.71432
Prpf19	1.25226	1.47331	1.4459	1.39695	1.25705	1.43534	1.37132	0.73635	1.55077
Kctd13	1.37512	1.17786	1.48645	0.995877	1.04223	1.08776	1.37121	0.388298	0.46985
Ppm1g	1.37936	1.38515	1.38209	1.47967	1.60119	1.66527	1.369	0.806091	1.06733
Itm2c	2.16548	1.57656	0.852047	1.91508	2.77339	2.99134	1.36854	3.87175	3.18139
Zdbf2	1.95718	1.07	1.16883	3.27568	3.63507	3.73488	1.36837	1.08205	0.42554
Kras	1.25624	1.23292	1.20006	1.1619	0.981812	0.936718	1.36739	1.16885	1.02682
Wtap	1.4026	1.3262	1.0689	2.00012	1.57811	1.58716	1.36607	0.843266	1.05249
Nsfl1c	1.32162	1.30248	1.22256	1.32419	1.20972	1.63797	1.3632	1.0186	1.06223
Cspg5	2.00207	1.02633	3.28331	0.82476	1.59584	1.79329	1.36302	1.08187	1.47341
Kdelr1	1.11719	1.21504	1.21348	1.08147	1.32446	1.23017	1.36174	1.27288	2.41898
Zfp462	0.51984	0.789845	0.699047	0.606071	1.35756	0.777065	1.3615	0.199411	0.54017
Rbm18	0.926877	1.20691	1.11159	1.03437	0.94422	0.965166	1.36128	0.358903	0.532945
Thoc7	1.56755	1.66746	1.9003	1.56828	1.4796	1.61182	1.36101	0.852805	1.65357
Papola	1.33016	1.38962	1.26445	1.70493	1.34542	1.39666	1.36084	0.796439	1.42819
Akirin1	1.21519	1.36239	1.15592	1.44385	1.11525	1.06922	1.35744	1.34427	0.839315
Napa	1.38432	1.41823	1.24441	1.33868	1.2333	1.3513	1.35605	1.18035	1.28165
Rer1	1.78167	1.57552	1.35345	1.45951	1.48326	1.60386	1.3556	1.8674	2.28351
Snf8	1.17485	1.34474	1.17943	1.15809	1.0065	1.01373	1.35329	0.575437	1.14175
Huwe1	1.04492	0.948881	1.02739	1.40976	1.4608	1.18205	1.35195	0.795491	0.716897
Lamtor5	1.41839	1.68513	1.1832	1.30749	1.05836	0.887276	1.35177	0.93702	1.54359
Zranb2	1.15299	1.15139	1.26145	1.14774	1.37632	1.46692	1.35142	0.760466	0.780517
Nol7	1.49909	1.23492	1.433	1.1882	1.45005	1.46926	1.35085	1.3023	1.23032
Rp9	1.58925	1.13813	1.42377	1.37339	1.52513	1.62612	1.35059	0.963439	1.0978
Sobp	1.00375	0.77796	1.54625	0.848032	1.57761	1.11936	1.35011	0.32687	0.437535
Sltm	0.947564	1.03953	0.909545	1.06613	0.988019	1.02715	1.34869	0.730517	0.917478
Atp13a2	1.06081	1.14269	1.65383	1.14363	1.31982	1.42569	1.34809	1.28965	0.712193
Glyr1	1.09439	1.22488	1.18135	1.24985	1.11394	1.08249	1.34788	1.03155	0.811375
Scamp1	1.00572	1.10857	1.9049	1.12739	1.05176	0.926661	1.34745	0.566036	0.418276
Ankrd12	1.12927	1.25164	2.05106	0.854398	1.12965	1.29524	1.34584	0.651808	0.712184
Selenom	1.37085	0.961442	4.31135	0.454537	0.892421	0.951834	1.34387	0.878605	1.64978
Ccdc124	1.18926	1.4454	1.59251	1.08172	0.979026	1.15933	1.34257	0.795242	1.33212
Kdm6b	0.822079	0.835455	0.641421	1.72098	1.34576	1.00796	1.34252	1.10958	0.790811
Acat1	1.61315	1.44563	2.0786	1.1894	1.41315	1.97795	1.34163	1.05837	1.12741
Raf1	0.696232	1.04623	1.09176	0.628776	0.809723	0.756958	1.33995	0.59302	0.847244
Fmc1	1.59566	1.50463	1.69982	1.21936	1.45977	1.27756	1.3376	0.659966	0.8502
Rbm8a	1.30819	1.39719	1.14595	1.82656	1.44807	1.1893	1.33689	0.80193	1.65279
Usp9x	1.35974	0.960502	1.29088	1.48068	1.5107	1.35523	1.33613	0.84423	0.649678
Maea	1.14762	1.36724	0.984215	1.16047	1.04546	1.08077	1.33582	0.93417	0.921178
Arid4b	0.956946	0.798561	0.827015	1.42515	1.26381	1.23024	1.33561	0.773233	0.724127
Tbpl1	1.29576	1.56227	1.04588	1.66894	1.58448	1.15508	1.33528	0.630742	0.838939
Sh3bp5	0.70023	0.938206	1.404	0.605582	0.775926	1.16324	1.33456	0.367254	0.467729
Ufc1	1.17907	1.28685	1.31403	1.23239	1.1534	1.2327	1.33322	0.950365	1.36345
Aktip	0.922602	0.913422	0.96923	0.940062	0.91922	0.779321	1.33296	0.291041	0.512328
Srsf4	0.696381	0.764563	0.763316	0.900686	0.681302	0.728115	1.33276	0.488538	0.758115
H2afj	1.13596	1.25615	1.0992	0.778932	0.861474	0.842479	1.33271	1.3178	1.37513
Ntan1	1.25124	1.24496	1.35098	1.01113	0.95468	0.987546	1.33265	0.868765	1.34574
Ckap4	0.864112	1.3675	0.966325	0.870881	0.706036	0.663558	1.33223	0.371477	1.80045
Gpx1	1.74695	1.87481	1.45203	1.22196	1.32154	0.830748	1.33217	6.02664	2.75002
Cdc26	1.08704	1.10399	0.973858	1.55292	1.32075	1.0584	1.33213	0.603511	1.51946
Pum1	0.968748	0.859736	0.932483	1.33183	1.17308	1.24944	1.33161	1.15192	0.997971
Eif4b	1.44733	1.22477	1.01378	1.45241	1.56719	1.8179	1.33094	1.37391	1.07878
Unc119	1.27892	1.16323	1.41931	1.12031	1.13086	1.2754	1.33029	0.369186	0.801278
Wac	1.27771	1.19416	1.11097	1.71137	1.64125	1.39314	1.33017	0.601411	0.990869
Ppig	1.4456	1.37184	1.51136	1.50259	1.5433	1.66165	1.32998	1.18212	1.61712
D430019H16Rik	0.996623	0.888915	1.13827	1.38338	1.49501	1.20953	1.32985	0.252934	0.530237
Ssr4	2.28711	1.56924	1.77192	1.72382	1.84158	1.46658	1.32918	3.64032	2.52262
Ncald	1.94293	1.23603	2.36757	0.90753	1.02258	1.86982	1.32823	0.71688	0.383338
Ypel1	0.546375	0.895651	0.664305	0.862139	0.8057	0.71871	1.32763	0.151768	0.331592
Srrm1	1.34943	1.13829	1.27226	1.46309	1.86327	1.6825	1.32745	1.49108	1.37768
Map6	1.34033	1.37028	1.41357	1.39934	1.41366	1.49008	1.32725	0.482462	0.552389
Adgrg1	0.745105	0.832294	0.686096	1.01759	0.790185	0.633463	1.32711	2.47236	0.875333
Arid1a	1.18893	1.21967	1.07991	1.80278	1.62966	1.19062	1.32682	1.29247	1.22871
Kif5b	1.63752	1.50869	1.28681	1.99656	1.81082	1.63799	1.3263	1.70572	1.80791
Wsb2	1.62671	1.21564	2.76025	0.775383	1.0836	1.52729	1.32342	0.776069	0.599122
Myt1l	1.27233	0.782057	2.89484	0.644961	1.30277	1.55659	1.3221	0.566739	0.255089
Robo2	1.00226	0.499434	0.975577	0.132222	0.338961	0.160173	1.32059	0.126798	0.557129
Gars	1.27501	1.4147	1.24041	0.822629	0.753098	1.06042	1.31965	0.652419	0.889787
C1qbp	1.862	1.57755	1.48916	1.49793	1.43155	1.7405	1.31702	1.54755	1.80945
Nudt11	1.2318	0.886866	0.895278	1.37407	1.24345	1.61346	1.31676	0.314166	0.307602
Atf2	0.954234	1.03528	1.02338	0.957785	1.03549	0.962084	1.31554	0.37261	0.584896
Sv2a	1.63107	1.06951	2.0356	0.880133	1.2331	1.4245	1.31519	1.01676	0.289821
Map4k4	1.01016	1.14509	0.959758	1.28553	1.54239	1.28438	1.31519	1.15107	1.13553
Ntm	1.19747	0.990185	2.80785	3.58821	1.57057	1.84337	1.31232	0.711939	1.34819
Clstn1	1.43093	1.52311	2.06189	0.753396	1.32397	1.4188	1.31174	0.749706	0.691681
Mn1	0.49686	0.924585	0.820696	0.589522	1.10926	0.68981	1.31169	0.0681595	0.518755
Shank1	0.837604	1.02028	1.45517	1.09543	1.32016	1.11214	1.30832	0.228771	0.288204
Eif3g	1.31857	1.40213	1.25181	1.51334	1.40392	1.27988	1.30804	0.992404	1.41202
Atp6v1a	1.40136	1.16366	2.04661	0.79613	0.855369	1.21822	1.30741	1.08776	0.636547
Tmem63b	1.19832	1.09681	1.09124	0.871392	1.0699	0.999285	1.3063	0.429598	0.551224
Cpsf6	0.939021	1.01527	0.943056	1.35488	1.31102	0.995762	1.30409	0.70871	0.971728
Deaf1	1.39856	1.1939	1.50895	1.4431	1.2804	1.77767	1.30373	0.462912	0.558284
Tmpo	0.627434	0.904373	0.931856	1.01319	0.884672	0.961591	1.30349	0.579413	1.82888
Psmd1	1.04078	1.03291	0.995982	0.99992	0.845587	0.987131	1.30324	0.778118	0.88856
Srsf10	1.17674	1.06469	1.0195	1.39356	1.66739	1.46046	1.30241	0.840943	1.19233
Zfhx2	0.534046	0.649684	0.338005	0.601773	0.80009	1.04415	1.30231	0.259572	0.304864
Limd2	1.09808	1.41775	0.926572	1.89786	1.0263	1.17506	1.30205	4.2831	2.69075
Ssu72	1.7263	1.93041	1.70228	1.65023	1.30918	1.48306	1.3	1.27339	1.665
Atp2b1	1.85675	1.88	2.24632	1.36341	1.5174	3.50003	1.29971	1.71002	1.575
Arf3	1.48628	1.07327	1.68669	1.00132	1.04498	1.10441	1.29923	0.971968	0.850717
Paip1	1.14584	1.06303	1.24456	1.42255	1.56183	1.49191	1.299	0.510281	0.475158
Gstm5	2.02852	1.8649	1.65612	1.67487	1.77413	1.70766	1.29861	0.540044	2.24576
Lsm8	0.835623	0.978744	0.684664	1.47021	1.0726	0.826829	1.29834	0.463268	1.19989
Ddx3x	1.23133	1.14931	1.16977	1.59701	1.38865	1.42021	1.29662	1.59356	1.49766
Hmgcr	2.05002	1.47667	1.63113	1.1011	1.77009	1.65781	1.29393	0.721821	0.890924
Mcrs1	1.22933	1.50706	1.27724	1.27659	1.08145	1.05797	1.28861	0.584988	0.980278
Gpbp1	0.999941	0.999617	1.08335	1.29857	1.18016	1.29457	1.28812	0.940774	0.770889
Mrpl41	1.61752	1.41919	1.60316	1.23028	1.17836	1.20193	1.28808	0.766887	1.03831
Kdm1a	0.936399	0.82057	0.841327	0.947419	1.10919	1.18847	1.28761	0.577135	0.634574
Clcn4	0.749457	1.03791	1.26223	0.847205	0.763477	0.882692	1.28759	0.625149	0.653307
Chmp1a	1.04374	1.09553	1.26821	0.958658	0.856625	0.926365	1.2836	0.94811	0.918866
Vsnl1	1.00594	0.53874	2.53259	0.120659	0.255529	1.94221	1.28311	0.511211	0.203665
Sfr1	1.79662	1.64586	1.37654	1.99035	1.41912	1.50233	1.28311	1.5373	2.35995
Kif1a	1.86171	1.29703	2.12524	1.35337	1.57026	1.6273	1.2831	1.01571	0.546106
Ciapin1	1.12289	1.75812	1.18596	1.10237	1.19226	1.06384	1.28272	0.432048	0.938486
Zfp618	0.344851	0.570474	0.524582	0.399953	0.554089	0.269685	1.27934	0.0828723	0.306355
Mrpl28	1.2276	1.25639	1.25098	1.25252	1.13132	1.41263	1.27926	0.738543	1.37983
Psmc2	1.51815	1.62391	1.38778	1.28892	1.1651	1.61661	1.27925	1.41102	1.27548
Tceal8	1.51114	1.53024	1.06718	1.87196	1.31273	1.29317	1.27837	0.728965	2.16946
Got2	1.27668	1.51478	1.45958	0.914666	1.0295	0.926562	1.27784	0.62052	1.06531
Eif3m	1.31702	1.56703	1.18136	1.42571	1.54198	1.55014	1.27732	1.27083	2.05005
Mrpl43	1.29795	1.31157	1.48946	1.44365	1.23801	1.52927	1.27395	0.957993	1.05765
Adgrl3	1.11979	0.583587	0.998354	0.582962	2.55482	0.985397	1.27285	0.351388	0.52305
Rhob	1.44645	1.49715	1.91075	1.36325	1.37559	1.82838	1.27263	8.43533	1.93022
Akt1	1.23202	1.12018	1.18167	0.888145	1.05459	1.13239	1.27156	1.89574	1.19828
Smim7	1.44774	1.49663	1.57736	1.3324	1.36646	1.39927	1.27034	0.756768	1.4355
Mtf2	0.593667	0.846636	0.589628	1.07266	0.870346	0.745269	1.26831	0.334873	0.545962
Hba-a1	1.18504	2.3184	1.04179	1.066	0.469615	0.299032	1.26708	0.192087	2.04479
Igsf8	0.326618	0.225635	1.06609	0.143521	0.306469	0.245185	1.26692	0.455061	0.414528
Barhl2	0.00432896	0.0304064	0.030355	0.00760187	0.00268804	0.397755	1.26601	0	0.0151976
Ssbp4	2.10355	1.63879	1.74329	2.39309	2.6696	2.53835	1.26562	2.26185	1.36405
Wbp4	0.998935	0.906707	0.990904	1.02382	1.01615	0.905045	1.26268	0.772461	0.705567
Pum2	1.12395	0.963257	1.17073	1.32882	1.31579	1.1737	1.26152	1.22059	0.805211
Fam96b	2.01103	1.53694	1.20401	2.24985	1.56208	1.7245	1.26117	1.0515	1.05513
Cep170	0.949244	0.909657	1.0941	0.903665	0.969775	1.11781	1.26037	0.488784	0.554713
Ssr2	1.29914	1.42825	0.952742	1.57381	1.9125	1.35471	1.26032	1.63896	3.18999
Ilf3	0.855218	0.908139	0.818685	1.05928	0.97479	1.08901	1.25865	0.539591	0.708493
Ppp4c	1.16545	1.33404	0.975874	1.56617	1.09735	1.26164	1.25706	1.05283	1.96061
Nyap1	0.8805	0.88069	0.895462	1.04801	1.1577	0.989232	1.25651	0.217086	0.243978
Grcc10	1.13653	1.2566	1.13961	2.05161	2.22356	1.24856	1.2562	0.473396	0.808935
Psmd14	1.33595	1.40401	1.15061	1.19856	1.21101	1.40003	1.25579	0.870859	0.99435
Ppa1	1.31254	1.32575	1.61025	0.769348	1.03339	1.12587	1.25231	0.677892	1.04592
Pcnp	1.26886	1.2599	0.998458	1.57664	1.33113	1.08348	1.24942	0.882341	0.929703
Sec11a	1.5033	1.32999	1.10718	1.78041	1.67814	1.86694	1.24905	0.958721	2.25846
Pkig	0.997686	1.43332	1.26496	1.60558	1.39557	2.05952	1.24408	1.92419	1.13068
Anp32a	1.50621	1.34285	1.08754	1.62395	1.80493	1.52164	1.24342	1.79846	3.01324
Polr2g	1.35592	1.21484	1.11918	1.23704	1.30925	1.27491	1.24184	1.02891	1.15874
Ccdc34	0.524121	1.01095	0.863844	0.997906	0.976035	1.31521	1.24075	0.428137	1.58018
Sez6l2	1.06721	0.820458	1.12967	0.70796	1.03614	1.10886	1.24022	0.398013	0.219794
Tmem183a	1.1133	1.13649	1.19713	1.09649	0.95176	0.890075	1.23941	0.461664	0.874032
Chic2	1.08494	1.14807	1.07341	1.33499	1.47135	1.27172	1.23918	1.00951	1.09133
Sar1a	1.01831	0.963386	0.910131	1.07935	0.866255	0.942669	1.23915	0.660354	1.58222
Mrpl58	1.16936	1.25104	1.16871	1.23079	0.960102	1.14933	1.23912	0.493778	1.10612
Arl4a	1.48051	0.760141	1.09675	1.13987	1.71629	1.44325	1.23894	0.334274	2.05442
Fgf13	0.87187	1.32291	2.43254	0.279013	0.983209	0.34099	1.23881	0.348805	0.35359
Nt5c3	1.1617	1.15089	1.13904	0.912616	1.21366	1.36616	1.2387	0.353315	0.482964
Chmp7	0.776985	0.753431	0.745767	0.936479	0.75482	0.833159	1.23812	0.247921	0.4916
Cdc42ep3	0.613627	0.467094	0.539752	0.605854	0.287378	0.439453	1.23722	0.128908	0.434199
Aimp1	1.31092	1.13899	1.13314	1.30375	1.51976	1.47464	1.2361	1.27009	1.19098
Lamtor1	1.28748	1.2102	1.23913	1.46609	1.09572	1.16892	1.23602	2.4401	1.66611
Sorbs2	0.466825	0.959016	1.03778	0.463962	0.809213	0.649684	1.235	0.141137	0.267702
Drg1	0.932804	1.17467	0.895599	1.12142	0.859658	0.994404	1.2349	0.634033	0.863817
Spg21	0.96123	1.20334	0.879428	1.0888	0.836182	0.88102	1.23291	0.731676	0.797177
Fyn	1.17682	0.993642	1.31522	0.842989	1.05311	1.34418	1.23202	0.602237	0.704225
Pcdh7	0.543386	0.436174	0.641843	0.724849	1.1685	1.23831	1.23165	0.527207	0.386503
Srpk2	1.21318	1.30523	1.57717	1.23114	1.40205	1.1137	1.23106	0.664381	0.918019
Cmip	1.44846	0.952504	1.29982	0.982093	1.37728	1.71847	1.22947	0.686865	0.416414
Hspa9	1.15799	0.97166	1.02701	0.963324	1.00259	1.11197	1.22946	1.00693	1.23812
Sod2	1.50707	1.47974	1.40061	1.17235	1.34799	1.18206	1.22739	0.905103	1.1229
Chchd6	1.36656	1.14478	1.77763	1.09536	1.31883	1.91114	1.2267	0.439608	0.642929
Slirp	1.46053	1.50362	1.16293	1.72625	1.73558	1.38372	1.22577	0.606369	1.39989
Timm17b	1.24286	1.23604	1.07039	1.09921	1.28132	1.03529	1.22569	0.728972	1.16646
Efna5	1.90667	0.777263	0.38139	4.29494	2.63548	2.52426	1.2252	0.33087	0.737308
Sin3b	1.30583	1.26889	1.0897	1.70764	1.3257	1.65245	1.22466	1.61148	1.49233
Kcnq1ot1	1.66237	1.25383	1.38708	1.6758	2.05513	1.74312	1.22414	1.68695	2.06384
Apc	1.22137	0.974057	1.20475	1.08247	1.27291	1.33234	1.22354	1.00172	0.698845
Poldip2	0.884717	1.03819	1.11178	0.885822	0.77972	0.865538	1.22326	0.643786	1.02218
Bmp7	0.103704	0.664089	0.0744185	0.123656	0.0393984	0.0242099	1.22288	0.0255525	1.47533
Smarcd1	0.615709	1.16363	1.005	0.518176	0.58622	0.520815	1.22197	0.286879	0.587197
Psd	1.68037	1.07407	2.23512	1.36384	1.88237	2.24198	1.22157	0.656463	0.32913
Bmyc	1.72314	1.24267	2.0128	1.09753	1.33816	1.49565	1.2209	1.77935	1.16988
Cadm4	0.779475	0.725257	0.936808	0.868595	0.985987	1.08226	1.21989	0.226345	0.385361
Ccdc28b	1.07843	1.28988	1.18622	1.38403	1.14201	1.33876	1.21933	0.552953	0.902351
Vti1b	1.63799	1.42421	1.68173	1.21527	1.12908	1.246	1.21761	0.705977	1.05392
Mrpl54	1.81616	1.70568	1.04188	1.82239	1.69017	1.50467	1.21635	0.870893	1.46776
Smap1	1.64119	1.56928	1.64328	1.63924	1.10105	1.33978	1.21341	1.24123	1.61995
Maf1	0.866671	1.0572	1.02597	1.29587	1.03327	0.87102	1.2132	0.771303	0.803395
Phax	1.24243	1.23636	1.20045	1.20628	1.20685	1.25177	1.2132	0.834724	0.877698
Ubn2	0.926649	0.988934	0.888262	1.38938	1.42613	1.18755	1.21227	0.518938	0.704688
Eif3d	1.24117	1.33182	1.0932	1.32736	1.15379	1.29432	1.21209	0.878423	1.24498
Stox2	0.818612	0.746767	0.887486	0.842675	0.939294	0.923067	1.21201	0.206541	0.524484
Ppp3cb	1.36403	1.05587	1.89107	1.15718	1.28743	1.46531	1.2118	0.619403	0.789963
Cops8	1.20788	1.16058	1.20373	1.4254	1.17699	1.15948	1.21023	0.618132	1.15321
Gstm7	0.673295	0.685994	0.61273	0.905098	0.633176	0.715606	1.20992	0.138722	0.245476
Vapb	1.46331	1.33105	1.18898	1.33945	0.91924	1.06384	1.20935	0.961875	1.17428
Spag9	1.22118	1.06241	1.0005	1.49606	1.48899	1.43936	1.20921	0.757083	0.854551
Cited2	0.977177	2.5692	1.00356	0.926213	3.46638	0.818841	1.20837	1.43795	1.16527
Dhx30	0.79025	0.861067	0.955213	1.08194	1.32901	0.903839	1.20774	0.433127	0.53663
Psme1	1.68552	1.30045	1.59244	1.18487	1.10932	1.71994	1.20756	2.30989	1.13949
Cnrip1	1.84116	1.62793	1.95299	1.42804	1.56949	1.94644	1.20715	0.66256	0.668411
Ahsa2	0.744123	0.990223	0.744455	0.879488	0.522675	0.59725	1.20663	0.261776	0.687531
Nudt10	0.992007	0.804279	0.919272	1.1113	0.986431	1.07412	1.20654	0.314929	0.189215
Cdk16	1.0899	1.24259	1.19049	0.854035	0.721591	0.797886	1.20628	0.376296	0.982134
Spag7	1.37692	1.66378	1.11305	1.74594	1.56936	1.42433	1.20624	0.845223	1.42191
Txnrd1	0.964335	1.07298	0.668398	0.948123	0.740737	0.841497	1.20499	0.46124	0.558013
Igfbp2	0.590174	0.731488	0.707902	1.74008	0.340435	0.549579	1.20491	0.215355	10.8967
Dbnl	1.11044	1.24036	0.940755	0.962775	0.91367	1.06258	1.20362	1.05853	1.03621
Stk25	1.36962	1.28981	1.65629	1.00851	1.10694	1.41078	1.20302	0.940037	0.836454
Usp34	1.34499	1.00425	1.31921	1.29959	1.72269	1.30319	1.2028	1.01742	0.688466
Sbno1	0.92993	1.02807	0.935923	1.27503	1.09376	1.03255	1.20261	0.748015	0.805082
Cyp51	1.35663	1.45014	1.21158	0.915123	1.05545	0.915482	1.2018	0.338908	0.733815
Sdhd	1.36337	1.27605	1.45164	0.988751	1.02597	1.19687	1.20095	1.25903	1.59657
Gpr85	0.683105	0.983831	1.19206	0.73296	0.980145	0.849384	1.19988	0.16235	0.191047
Csk	1.12512	1.36052	1.40706	1.02235	1.03479	0.970858	1.19698	1.3234	0.919045
Jkamp	1.2633	1.27318	1.04121	1.17484	1.17734	1.05605	1.19471	0.842724	0.768984
Zmynd11	1.111	0.958853	1.19397	1.21834	1.40978	1.30172	1.19368	0.904225	0.804198
Mrpl33	2.09419	1.44334	1.99626	1.77417	1.98946	2.08037	1.1926	1.12936	1.77413
Tmx2	1.18757	1.20652	1.44292	0.985015	0.991465	1.03311	1.19245	0.952983	0.685859
Rap1b	1.4867	1.99182	1.38963	1.49398	1.29584	1.05568	1.19232	4.54839	2.43132
Vezf1	0.710826	0.807917	0.650053	1.38283	0.952096	0.708728	1.19227	0.24353	0.661727
Haghl	1.12959	0.937328	1.25605	1.15974	1.20073	1.20319	1.19155	0.82094	0.61246
Atp6v1g2	1.53605	0.948265	1.63769	0.734464	1.21403	1.34276	1.19081	0.503463	0.263172
Cxxc4	0.953495	0.652915	0.764747	0.683321	0.694361	0.791176	1.19015	0.284791	0.451901
Nktr	1.10664	1.11564	1.2737	1.34264	1.55241	1.33895	1.18919	1.02228	1.44884
Bpgm	0.93575	1.07253	0.843986	0.925686	0.932738	0.831039	1.18861	0.196696	0.541889
Mapre3	1.43533	1.08744	1.34891	1.73103	1.53793	1.82772	1.1886	0.393818	0.437242
Trappc3	1.01052	1.15077	1.47175	0.976648	1.08268	1.2513	1.1875	0.980108	0.787058
U2af2	0.814553	0.949369	0.821326	1.04169	1.00247	0.896346	1.18746	0.657429	0.991279
Pdlim7	0.919723	0.882023	1.17169	1.6016	1.03448	1.19443	1.18724	0.20449	1.345
Atp6ap1	1.12473	1.32133	1.44121	0.957148	0.9691	1.15957	1.18668	1.30285	0.907007
Rps27l	2.11003	1.77837	0.925011	2.73969	2.15774	1.7971	1.18652	1.66734	4.54842
Pitpna	1.35987	1.30275	1.73723	0.879974	0.958387	1.02227	1.18651	1.59817	1.06254
Ssna1	1.40213	1.38638	1.09198	1.24057	1.02602	1.01653	1.18598	0.726662	1.50971
Azin1	0.714552	0.870373	1.16171	0.757028	0.753895	0.689406	1.18386	0.440799	0.695246
Mid1ip1	0.993535	0.551789	0.638694	0.593293	0.466311	0.447685	1.18381	1.11252	1.08742
Plekhj1	1.37564	1.22971	1.27061	1.35944	1.16886	1.23917	1.18344	1.19412	1.19166
Ccar1	0.797735	0.930765	0.890632	1.01481	1.08648	0.895063	1.18204	0.938373	1.11748
Actr2	1.34747	1.23894	1.48948	1.11288	1.13575	1.09861	1.18025	2.25354	0.902046
Smc3	0.861506	1.1797	0.875779	0.933432	1.02823	1.16685	1.18011	0.772384	1.15473
Sppl3	1.14889	0.870714	1.23747	1.02643	1.1449	1.12896	1.17904	0.911321	0.878841
Ehmt2	0.753523	0.647048	0.765515	1.02426	0.949317	0.856702	1.1788	0.479368	0.524114
Arl2	1.27867	1.21935	1.1418	1.09671	1.15893	1.39423	1.17766	0.563227	0.842799
Arpc4	1.28461	1.39588	1.4149	1.21475	0.985341	1.13546	1.17756	3.03408	1.31082
Mthfd2l	0.916254	1.09022	0.92304	1.56129	1.43577	0.916453	1.17745	0.1884	0.744832
Srebf2	1.19354	1.21302	0.970775	0.984842	0.755493	0.843919	1.176	0.458157	0.855394
Bloc1s2	1.33212	1.3151	1.24478	1.41001	1.12476	1.0844	1.17567	0.590604	0.848763
Znhit1	1.19731	1.1382	1.71118	1.23554	1.10904	1.25923	1.17406	0.545425	0.999571
Ensa	1.09698	0.861053	1.23068	1.2131	0.907144	1.20276	1.17325	0.778164	0.546614
Mtdh	1.32786	1.2068	1.34987	1.38846	1.34305	1.47222	1.17284	3.39362	1.85283
Slc30a9	1.01591	1.04081	0.949719	0.936947	0.942022	1.02783	1.17271	0.377823	0.537997
Sar1b	1.25585	1.32403	1.67546	1.18689	1.17861	1.71656	1.17244	1.12364	1.11601
Zc2hc1a	1.13805	1.29449	1.26589	0.760697	0.866385	1.05432	1.17167	0.262079	0.51996
Plk2	0.556272	0.8346	0.677837	0.25497	0.752148	0.516682	1.17156	0.388565	0.365694
Adh5	0.906743	1.24622	1.0918	0.93672	1.15704	1.08524	1.17037	1.03689	1.13165
Chchd10	4.28983	0.81629	2.62345	0.956497	2.20086	0.801762	1.16765	0.62219	1.39581
Lrpap1	1.21225	0.805503	1.12681	0.91826	1.08441	1.31523	1.1671	1.18573	1.13349
Dync1h1	1.20806	1.10528	1.52073	1.1145	1.36286	1.23989	1.16686	0.992759	0.924035
Ssrp1	0.835058	0.926345	0.750872	1.008	0.812714	0.951029	1.16598	0.870928	1.42197
Ddx24	1.19389	0.972511	1.25981	0.890849	1.12988	1.25971	1.16519	0.910011	0.8071
Kif2a	1.1839	1.10838	1.1704	0.987378	0.963855	1.16459	1.16448	0.502497	0.634407
Olfm2	1.64117	1.36513	2.16081	0.706471	2.41586	1.38532	1.16268	0.401895	0.297589
Kansl2	1.10072	1.13296	1.01226	1.57539	1.14015	1.0379	1.16198	0.559294	1.01789
Eif6	1.21624	1.26577	1.03411	1.19595	1.30774	1.18601	1.16192	0.905724	1.40023
Zfr	1.73383	1.22478	1.59499	1.66909	1.73998	1.80759	1.16147	0.96517	0.874742
Miat	0.658464	0.745	0.797453	0.91559	1.54232	0.831663	1.16068	0.306508	0.411324
Mtfr1l	0.962968	0.981144	1.02152	0.916697	0.787565	0.821718	1.16031	1.27785	0.901096
Txndc15	0.944061	1.11339	1.17416	1.08537	1.02139	1.05347	1.15964	1.01796	1.164
Slc25a51	0.953536	0.866207	0.691743	1.17418	1.15697	0.93921	1.15879	0.433985	0.792757
Zfp292	0.883735	0.891301	0.776506	1.22915	1.19854	1.00257	1.1582	0.771905	0.498217
Fopnl	1.06069	1.07804	1.13628	0.950422	0.932071	1.05465	1.15671	0.490193	0.726017
Polr2c	0.968874	0.96509	0.7958	1.16899	1.0517	0.983364	1.15649	0.611553	1.08309
Lrrc59	0.934945	1.25286	0.948003	0.658067	0.459678	0.604442	1.15551	0.641436	1.76136
Lmnb1	0.663261	0.914142	0.733713	0.937239	0.697249	0.517874	1.15483	0.22183	1.43965
Rbm17	1.34775	1.4103	1.34951	1.21452	1.14708	1.33991	1.15431	0.94497	1.28164
Polr2e	0.909631	1.0074	0.842698	0.92282	0.798067	0.808764	1.15405	0.867644	1.32927
Anapc13	1.29298	1.43518	1.14322	1.99244	1.48376	1.32994	1.15345	0.70309	1.709
Nras	1.0438	1.24565	0.72074	1.16497	0.992968	1.04004	1.15327	0.901526	1.31337
Pten	2.38663	1.3844	1.86399	1.44014	2.11412	1.88731	1.15317	1.66285	0.96903
Hdac3	1.11943	1.03021	1.08219	1.07301	0.951676	1.10636	1.15269	0.569186	1.00011
Ppp2r2b	1.86355	1.17561	2.04304	1.36501	1.25232	2.16007	1.15095	0.69638	0.767872
Trim32	0.811636	0.853075	1.26182	0.676803	0.772398	1.06025	1.15011	0.352383	0.441312
Abi2	1.18074	1.03321	1.23375	1.2126	1.35639	1.45103	1.14989	0.480069	0.572646
Srp19	1.42304	1.22878	1.50271	1.35747	1.23315	1.32064	1.14923	0.880972	1.18692
Dlg4	1.35184	1.14943	1.29898	1.48639	1.68654	1.48563	1.14788	0.728159	0.501641
Tax1bp1	0.788882	0.860826	0.947773	0.670936	0.696005	0.648358	1.14765	0.949695	0.875185
Sec23a	0.909384	1.0168	0.916502	0.858796	0.738068	0.725584	1.14749	0.27753	0.553614
Eif5b	1.31836	1.371	1.48838	1.52185	1.43714	1.3871	1.147	1.1178	1.72657
Blmh	0.992047	1.19941	0.969031	1.00474	1.20303	1.15287	1.1448	0.791504	0.923378
Mmd	0.802332	1.3603	1.32696	0.823405	0.699512	0.525374	1.14472	0.266174	0.710522
Krit1	0.904138	1.0877	0.999489	1.10744	1.14848	0.96753	1.14374	0.603058	0.907778
Mrps18a	1.20782	1.14788	1.14671	1.16996	1.02746	1.07075	1.14355	0.741746	0.989636
Lrrn3	0.717876	0.695941	1.10364	0.638748	0.480831	0.742683	1.14324	0.269896	0.221051
Sdhc	1.04452	1.29093	1.12516	0.966104	0.772509	1.01251	1.14216	0.655731	1.25011
Klhl7	0.850318	0.730808	0.851971	0.884765	1.15051	1.18519	1.14209	0.480231	0.403875
Abr	0.902431	0.738644	1.53839	0.944144	0.971632	1.39571	1.14187	0.61839	0.404504
Fabp3	2.25429	1.41911	2.8125	1.6893	1.90642	2.40646	1.14181	0.873717	0.329774
Fam136a	1.11925	1.17483	0.897133	1.01698	1.01746	0.969741	1.14181	0.349949	0.733663
Csrnp3	1.09251	0.817342	1.13242	0.83295	1.11536	1.44579	1.14007	0.35425	0.286038
Fam104a	1.44773	1.13673	1.05352	1.60433	1.18748	1.13749	1.13932	0.70876	1.50935
Gm42418	2.2015	1.08606	2.1306	0.89644	1.99971	2.83137	1.13883	4.67501	1.70579
Negr1	1.26036	0.953997	1.44847	1.76256	2.27625	1.47217	1.13865	0.49771	0.321859
Atad1	1.13034	1.08853	0.968525	1.18857	1.34808	1.19938	1.13859	0.511923	0.532404
Otub1	1.17552	1.16219	1.13565	1.07935	0.924221	0.855633	1.13827	0.867633	1.0434
Nop53	1.04536	1.27399	0.932498	1.60757	1.43606	1.40157	1.13551	0.815243	1.15376
Tkt	2.11052	1.85589	1.66573	1.16367	1.50839	1.58551	1.13332	1.8512	2.31341
Wnt5a	0.0730885	0.0854305	0.343403	0.00909081	0.0505709	0.0258787	1.13301	0.0839994	0.400063
Ap2a2	1.02957	1.09904	1.35456	0.780312	1.04252	0.930225	1.13259	0.781911	0.781622
Eif4g1	1.31309	0.925783	1.20519	1.24354	1.25005	1.35294	1.13236	1.20439	1.32691
Spast	0.820322	1.03906	0.871647	0.887061	1.00286	1.01151	1.13137	0.430303	0.532131
Bend5	0.987202	0.831101	0.713987	0.9816	0.922439	0.923001	1.12896	0.214902	0.413791
Egln2	1.18014	1.30835	1.10538	1.35377	1.01107	1.09652	1.12691	0.622311	0.990388
Grpel1	1.09638	0.926874	1.09641	1.0178	0.849736	1.079	1.12682	0.816975	0.870296
Prrc2a	1.07014	0.878644	0.962496	1.30316	1.21889	1.12177	1.12622	1.05671	1.19825
2410002F23Rik	1.07237	0.999472	1.1778	1.17762	1.15327	1.5646	1.12579	0.52405	0.732497
Ndufs8	1.21639	1.31754	1.46616	1.30719	1.24025	1.2934	1.1237	1.35642	1.5368
Aprt	2.26815	1.42783	1.2841	1.74749	1.63896	1.98358	1.12345	1.06757	2.08044
Ilkap	0.981973	0.867579	0.879402	1.12569	0.971801	0.994223	1.12267	0.657204	0.927956
Suclg1	1.35623	1.15136	1.10803	1.27171	1.23616	1.60585	1.12197	1.0798	1.12941
Ddx50	1.01961	0.830053	0.822267	1.289	1.18857	1.19823	1.12112	0.760746	1.212
Slc39a6	0.831042	0.823064	0.916799	0.788007	0.692874	0.832763	1.11999	0.224996	0.622317
Tm2d1	1.44614	1.37903	1.52569	1.42208	1.24052	1.24182	1.11989	0.857449	1.07567
Panx1	1.02666	1.01683	1.02893	0.709234	0.674955	0.875257	1.11987	0.161588	0.468976
Echs1	1.19834	1.1589	0.939253	1.3095	1.22083	1.21213	1.11826	0.970193	1.27677
Med25	0.800857	0.843668	0.849363	1.1455	0.991958	0.949862	1.11791	0.583383	0.865717
Nop56	1.12493	1.02774	1.23062	1.06304	1.39372	1.36704	1.11618	1.0628	0.931497
Sf3b5	1.44961	1.30685	1.21571	1.53419	1.30646	1.61849	1.11597	1.19909	1.87531
Ghitm	0.744346	1.00023	1.01439	0.456654	0.395751	0.491214	1.1153	1.01833	0.873517
Rab24	0.983519	0.928951	1.01066	1.22144	1.09056	0.923493	1.11445	0.921555	1.03255
Dbndd1	0.495429	0.795698	0.805166	0.562939	0.593911	0.538532	1.1141	0.0729691	0.195672
Lsm3	0.92314	0.986098	0.952797	1.12724	1.09987	1.37716	1.11397	0.522572	1.59886
Mrpl42	1.49703	1.41401	1.50793	1.27683	1.36611	1.17987	1.11356	0.831122	1.88854
Xrn2	0.644898	0.676367	0.640375	0.779707	0.644721	0.803731	1.11333	0.653486	0.702977
Ei24	1.12753	1.14476	1.33067	1.09661	0.975577	0.896886	1.11258	0.719478	1.33628
Fam114a2	0.823439	0.84	0.647819	0.735048	1.2095	0.585523	1.1119	0.664026	0.576882
Mt3	2.50065	1.08292	7.38212	0.533792	0.771253	0.802051	1.11159	1.12059	3.40804
Macrod2	0.658311	0.811846	1.15285	0.377775	0.599909	0.390764	1.11117	0.137067	0.455223
Tmed7	0.949829	0.899729	1.01448	1.13422	1.08094	0.946289	1.11109	1.11516	1.15798
Yaf2	1.19224	1.27839	1.38676	1.08242	1.12467	1.02889	1.11095	0.746801	1.18492
Impact	1.67414	0.936424	1.54072	0.780897	0.812829	0.68323	1.11069	1.42367	0.577951
Commd1	1.28797	1.2282	0.959765	1.44957	1.23864	1.54601	1.11052	0.977605	1.62841
Ap1m1	0.774975	1.18664	0.920503	0.818994	0.760311	1.03429	1.10892	0.553503	0.82341
Mad2l2	0.702529	0.942891	0.669733	1.80915	1.48447	1.34874	1.10805	0.3115	0.379995
Lsm1	1.32093	1.21836	1.72265	1.25518	1.17016	1.39909	1.10794	0.936209	1.04557
Snrnp27	1.29139	1.21219	1.11274	1.33963	1.26885	1.10196	1.10756	0.795593	1.11114
Rtcb	0.973895	1.12761	0.992626	0.967263	0.925531	0.978292	1.10737	0.778108	0.977319
Zfp580	1.15259	1.26297	1.45487	1.12316	1.05027	1.37431	1.10736	0.354677	0.715378
Itpa	0.786147	1.14469	0.906216	1.1259	0.913832	0.913441	1.1071	0.305214	0.775372
Snx6	0.932703	1.13261	0.986597	0.913514	0.917083	1.05151	1.10704	2.02406	1.86598
Pigp	1.47462	1.31576	1.0709	1.49795	1.48388	1.36372	1.10701	0.665241	1.14721
Fto	0.633629	0.676886	0.733815	0.654638	0.659338	0.704678	1.10657	0.34087	0.519246
Enc1	0.821258	0.832472	2.17679	0.295638	0.326297	0.444681	1.10509	0.403448	0.27284
Scp2	1.16924	1.20267	0.978796	1.34905	1.11825	1.12952	1.10211	1.9474	1.70579
Atp9a	1.5063	1.02559	2.44537	0.714458	1.22734	1.40945	1.10176	0.589246	0.573689
Selenot	1.01015	1.03972	1.32488	1.00722	0.971545	0.843651	1.10166	0.838412	0.864928
Banf1	1.12646	1.12114	1.14352	1.118	1.21917	1.22063	1.10105	0.66675	1.40964
Kidins220	1.63646	1.2767	1.54965	0.991439	1.66652	1.3945	1.09981	0.724423	0.731267
Edil3	0.469673	0.736266	1.13856	0.191687	0.720316	0.487467	1.09946	0.353811	0.251281
Vps35	1.18158	1.1572	1.1847	0.948262	1.04808	1.38779	1.0988	1.31467	0.880538
Coprs	1.2605	1.16819	1.40287	1.09404	1.09496	0.745157	1.09696	0.477842	0.523536
Eef1a2	1.7267	1.12008	2.22452	1.53926	2.21827	2.31496	1.09406	0.808897	0.27596
Tram1l1	0.890805	1.1277	0.843481	0.788389	0.979244	0.862541	1.09393	0.270312	0.485737
Msi2	0.758059	1.72825	0.950849	0.939901	1.70062	1.00607	1.09389	0.418708	0.957179
Ptpn5	0.789254	0.953182	1.28962	0.544227	0.974207	0.974201	1.0926	0.264397	0.26731
Ankra2	1.35391	0.971626	1.65714	1.46994	1.56028	1.70819	1.09162	0.561999	0.492374
Gnai3	0.886517	1.00516	0.749471	1.04972	0.902489	0.954224	1.09143	0.434421	1.06879
Ccnl2	0.816668	0.819394	0.837846	1.19651	1.40109	1.12064	1.09095	0.913809	0.857195
Ube2g1	0.806949	1.21915	0.968598	0.853658	0.720789	0.649023	1.09038	0.536001	0.806972
Dctn1	1.22485	1.12999	1.04589	0.859092	1.0744	0.981199	1.08873	0.755503	0.623074
Suds3	0.880236	0.994212	1.13304	1.01006	0.881985	1.01675	1.08619	0.564042	0.966659
Cops5	1.16918	1.44292	1.01926	1.12117	0.95874	1.05644	1.08553	0.458807	1.27024
Cs	1.1065	1.23515	1.19592	0.824734	0.82055	0.784907	1.08534	0.599645	1.24045
Rab5c	0.898582	1.13421	1.05015	0.963618	0.829199	0.77437	1.08516	1.74455	1.14324
Wasf1	0.698506	0.874319	1.1517	0.720647	0.621153	0.848651	1.08463	0.165656	0.340673
Ehd1	0.824221	1.10991	0.905039	0.823422	0.735974	0.6418	1.08445	0.23111	0.978583
4930402H24Rik	0.972723	1.01815	1.02359	0.953432	1.01317	1.07215	1.08418	0.405539	0.692626
Syngr3	1.44171	1.03634	1.90045	0.521851	0.838829	1.04148	1.08255	0.579581	0.205905
Sh3kbp1	0.745605	0.404692	0.750023	1.28194	0.652735	0.452062	1.08185	0.754998	0.259728
Gnai1	1.02581	0.834757	1.13742	0.341721	0.62783	0.712471	1.081	0.413176	0.440909
Nsd2	0.946119	0.988373	1.21103	0.996385	1.41208	1.20955	1.08055	0.607172	0.863326
Ip6k1	0.819031	0.814047	0.989525	1.06412	1.0822	1.07469	1.07972	0.560186	0.626269
Atp2a2	1.44328	1.00116	1.84535	0.910099	1.42196	1.43769	1.0793	1.4036	1.28482
Tmcc1	0.630146	0.834515	0.770943	0.822225	0.759885	0.627103	1.07909	0.3113	0.504525
Fam168b	0.788442	0.878631	1.07651	0.687837	0.65363	0.697152	1.07865	0.696284	0.650806
Mrps26	1.32344	1.18564	1.24197	1.19347	1.18264	1.26315	1.07838	0.885635	1.08531
Ddx17	1.02539	1.02199	1.04748	1.32915	1.60655	1.33046	1.07774	0.702667	1.27612
Cacng4	0.867451	1.19375	1.35625	0.856883	0.987121	1.15913	1.07756	0.278262	0.32906
Cdkn2d	1.38517	1.51995	1.54171	1.06795	0.821716	0.936824	1.07687	0.564127	0.731219
Cab39	1.01166	1.06124	1.06528	0.848973	0.951638	0.946511	1.07554	0.588922	0.647583
Narf	0.439992	0.79999	0.536093	0.350551	0.314247	0.308315	1.07477	0.225676	0.343737
Phf14	0.725656	0.771676	1.23677	0.810407	0.933774	1.23448	1.07434	0.909005	0.718738
Dusp8	0.838493	0.917193	1.09036	1.52238	0.939093	1.05335	1.07356	0.271884	0.198385
Clmp	0.522862	1.35385	1.35042	0.473102	0.530258	0.532621	1.07347	0.194746	1.19642
Csnk1d	0.97472	0.934151	0.888151	1.51311	1.08273	1.23624	1.07304	1.10431	0.840264
Spint2	1.41925	0.474888	1.66291	0.884831	1.44385	1.50964	1.07231	0.479998	0.345886
Prkra	1.18973	1.28964	1.34837	1.20597	0.996735	1.26754	1.07215	0.636551	1.00107
Dpf1	0.840093	0.794352	0.619809	0.759089	0.846857	0.912027	1.07122	0.190779	0.278366
Mrpl14	1.4366	1.19921	1.2839	1.48992	1.64582	1.75308	1.07057	0.727014	1.1652
Tnik	0.840001	0.847192	1.13738	0.921936	1.28625	1.24065	1.07045	0.434027	0.543015
Ogfr	0.868735	0.972551	0.702963	1.32894	0.988636	0.807367	1.06936	0.379773	0.714506
Ndufv1	1.04127	1.14668	1.29601	1.03731	1.05555	1.30634	1.0684	0.924962	1.07144
Nudt3	1.25081	1.00355	1.22758	0.820466	0.995447	1.23613	1.06666	0.795147	0.575712
Ap1s2	2.96199	1.61356	1.98799	0.795454	9.3755	0.617513	1.06597	1.23203	0.619373
Cd47	1.41815	1.45606	2.97493	0.7376	1.32549	1.31463	1.06531	1.91561	0.841377
Ddost	1.15631	1.02591	1.15966	1.1172	1.2027	1.57393	1.06521	1.62592	2.25919
Adrm1	1.21014	1.21957	1.10264	1.42883	1.03032	1.26451	1.06478	0.775487	0.949145
Ing1	0.778913	0.794655	0.660687	0.987039	0.729813	0.648409	1.06259	0.763118	0.991677
Ralgds	0.899502	1.17731	0.91372	1.05636	0.912855	0.930624	1.06243	0.422289	0.659803
Clns1a	1.10398	1.3197	1.06433	1.01162	0.891223	1.0841	1.06196	0.828877	1.34729
Cltc	1.46446	1.13584	1.72299	1.17918	1.22961	1.48238	1.06153	2.8383	1.50251
Cisd2	1.11277	1.15725	1.02633	1.45847	1.35392	0.991554	1.06137	0.820957	1.05892
Pnpla8	0.943957	0.940088	0.969418	0.921797	0.924183	0.843014	1.0612	0.582219	0.5998
Upf3b	0.799844	0.771652	0.717291	0.955787	1.01605	1.07487	1.0611	0.476678	0.573197
Mgea5	0.849462	0.909549	1.007	0.814171	0.752611	0.986122	1.0604	0.743124	0.580912
Sae1	0.782678	1.15526	1.21543	0.574852	0.553083	0.727239	1.06034	0.642762	1.32749
Atraid	1.34785	0.989203	0.969647	1.20964	1.21918	1.28803	1.05931	1.88932	1.25906
Magee1	0.90265	0.872733	1.23995	0.665999	0.923449	0.847715	1.05797	0.52936	0.308332
Foxn3	0.877796	0.895231	0.845297	0.933077	0.909598	0.68976	1.05759	1.83556	0.924985
Vopp1	0.638192	0.863639	0.809829	0.621953	0.507501	0.636886	1.05642	0.143347	0.350083
Fam171b	1.65373	1.31103	1.81121	1.45482	1.64034	1.71011	1.05614	0.538068	0.585938
Elp5	0.969972	1.07945	1.02574	0.890754	0.786793	0.77891	1.0556	0.507819	0.903679
Pigt	0.829594	0.812535	1.17621	0.823469	0.737614	0.926747	1.05536	0.847316	1.00605
Armcx2	1.15505	1.38207	0.981699	1.21079	1.16932	1.18357	1.05248	0.329913	1.29194
Stip1	0.927002	1.00708	0.791551	1.09547	0.854771	0.98176	1.05158	0.477128	0.912429
Anp32b	1.8448	1.38214	0.804984	1.93917	1.75695	1.48122	1.05156	1.7191	4.40929
Mvb12b	0.679012	0.641671	0.91346	0.746137	0.697147	0.629994	1.05026	0.440261	0.361496
Bola2	1.61626	1.5395	1.58882	1.36105	1.4404	1.50156	1.04968	1.18711	1.49395
Comt	1.21151	0.918992	1.13222	1.0499	1.1865	1.05621	1.04871	2.40537	1.72556
Idh3b	1.08371	1.15189	1.41017	1.14225	1.07879	1.26938	1.04837	0.776325	0.896049
Mrpl11	1.19073	1.18331	1.17146	1.08084	1.03557	1.30673	1.04807	0.792531	1.06454
Zfp821	0.78588	0.930804	0.794419	1.01054	0.927113	0.984387	1.04736	0.194541	0.41977
Bptf	1.06159	0.952378	1.02853	1.52651	1.58788	1.33698	1.0472	1.14937	1.07338
Ccnt2	0.577555	0.718394	0.813129	0.753892	0.950146	0.589725	1.0471	0.427092	0.560612
Sdc3	1.36325	1.16513	2.19627	0.734714	1.01464	1.80627	1.04709	0.62936	0.492857
Hspa4	1.00304	0.826083	0.906943	0.740337	0.667656	0.802908	1.04565	0.962594	0.88325
Rogdi	0.771078	0.972517	1.09998	0.799845	1.03132	0.799303	1.04546	1.52722	0.346113
Ankrd46	0.693853	0.919965	0.967509	0.444613	0.424787	0.499103	1.04463	0.32862	0.546382
Lcmt1	1.10035	1.00761	0.947748	0.809791	0.898398	1.13269	1.04447	0.437892	0.598908
Lmx1b	0.0119543	0.0252562	0.564085	0.0124688	0.0223791	0.0119086	1.04443	0.0121476	0.0503181
Eif2s3x	0.800829	1.00819	0.917805	0.572405	0.739608	0.691071	1.04409	0.529859	0.678275
Dpm2	1.00867	0.978143	0.960466	0.778344	0.826425	0.849647	1.04404	0.638954	0.853455
Nova2	1.14087	1.07617	1.08469	1.13926	1.2385	1.4147	1.04391	0.32296	0.394824
Klhl9	0.82791	0.706265	0.793745	1.02838	0.882367	0.961175	1.04386	0.461755	0.658723
Ppm1b	0.724882	0.813603	0.775736	0.957887	0.657814	0.67108	1.04267	0.268606	0.52169
Senp6	1.06939	0.930846	0.938866	1.07151	1.2455	0.989793	1.04248	0.920181	0.804064
Idh3g	0.881742	1.17185	0.912543	1.24043	1.06602	1.19926	1.04228	0.997453	0.927828
Ap1ar	0.803988	1.00859	1.05946	0.705152	0.747	0.903997	1.04184	0.406618	0.452715
Atl1	0.878614	1.02917	1.09792	0.633734	0.747688	0.758804	1.04179	0.32331	0.258687
Luc7l	0.792199	0.712794	0.802031	0.926	0.935869	0.935639	1.04149	0.439584	0.698046
Tmed10	1.26405	1.38697	1.27029	1.19422	1.4817	1.40244	1.04059	2.10217	2.80285
Ost4	1.0587	1.43216	1.37748	0.847272	0.452373	0.466213	1.04051	1.78875	3.50336
Cops4	1.10438	1.20164	1.11583	1.16524	0.982915	1.12679	1.03992	1.12238	1.15707
Fyttd1	1.193	1.12342	1.16935	1.097	1.247	1.22222	1.03917	0.621882	0.627343
Fbxo44	0.588087	0.773319	0.642323	0.935729	0.7444	0.827245	1.03863	0.084811	0.189196
Camk1	1.136	0.903965	1.14809	1.21327	0.940453	1.06443	1.03859	3.36501	0.823609
Smap2	0.893145	0.550491	0.831103	0.536905	0.684979	0.873374	1.0385	2.45277	0.441425
Clpp	1.16109	0.961616	1.03588	1.35904	1.20773	1.15971	1.03723	0.495136	0.73171
Sptan1	1.25614	1.08124	1.37116	1.05752	1.2653	1.47353	1.03677	0.645954	1.00462
0610010F05Rik	0.874175	0.938926	1.09042	0.78662	0.780705	0.79447	1.03656	0.310331	0.382483
Stau2	0.803125	0.786852	1.28929	0.485102	0.64232	0.782219	1.03549	0.372135	0.403392
Ube2e2	1.39393	1.1925	1.65803	1.0747	1.0955	1.41151	1.0353	0.475261	0.783344
Gpsm1	0.692598	0.737923	0.698015	0.66739	0.652447	0.83966	1.03511	0.327778	0.472491
Ythdc1	0.717132	0.648462	0.641508	0.853089	0.971483	0.955735	1.03374	0.695311	0.63266
Grik5	1.02647	0.885168	1.22429	1.20143	1.17092	1.11938	1.03339	0.592182	0.458136
Rbm42	0.860686	0.976718	1.00212	0.966081	0.890668	1.15094	1.03297	1.10743	0.979544
Zcchc17	1.09088	1.05802	1.22698	0.793218	0.84116	0.989776	1.03252	0.594065	0.685315
Ss18l2	1.06319	1.0144	1.2036	0.855326	0.981904	0.903116	1.03231	0.407661	0.684373
Glud1	0.890842	0.973112	1.04356	0.747706	0.790645	0.688897	1.03151	1.11788	1.37674
Vta1	0.687507	0.984533	0.853557	0.680856	0.65179	0.943114	1.03011	0.773905	0.496907
Txnl4a	1.23201	1.12094	1.28751	0.909222	0.756793	1.20097	1.02922	0.525726	0.985382
Smarca5	0.989684	0.987134	0.716862	1.20621	1.05488	0.857412	1.0283	0.774237	0.938174
Scn3b	0.818564	0.849802	1.46948	0.479921	0.881361	0.626489	1.02758	0.278463	0.208443
Tomm70a	1.17689	1.03951	1.15752	0.969838	0.989436	0.946714	1.02753	0.53736	0.701853
Jph4	1.11685	0.847085	1.47097	1.03064	1.083	1.01306	1.02744	0.326597	0.236237
Gm47283	1.44389	1.01062	1.52272	1.35497	1.69611	1.80491	1.027	1.24619	1.39241
Rbbp7	1.36983	0.945419	0.922573	1.1328	1.06296	1.04085	1.02625	1.13683	1.61386
Ubtf	0.594022	0.672013	0.787412	0.665174	0.650167	0.728956	1.02495	0.692561	0.839315
Clk1	0.715582	0.599423	0.653998	1.15173	1.15105	1.08404	1.02425	1.56498	0.869888
Fhl1	0.79423	0.72519	0.890203	0.687696	1.00348	0.896534	1.02421	0.283517	0.411739
Sugt1	0.993405	1.12507	0.833896	0.829876	0.809196	0.795079	1.02323	0.845447	1.11075
Gfod2	0.710271	1.0026	1.02525	0.776683	0.642917	0.828791	1.023	0.157382	0.353466
Hypk	1.70144	1.34527	1.39733	1.85116	1.66324	1.78574	1.02111	0.904279	1.06849
Yipf4	0.895275	0.856534	0.69246	1.22856	1.07372	0.822936	1.02043	0.909526	0.806938
Tmem176b	1.42433	1.30216	0.524826	2.65712	1.77739	1.63807	1.01996	2.87313	2.37822
Brd4	1.1171	0.985517	1.03622	1.31155	1.32081	1.40453	1.01984	0.754112	0.985707
Ctsl	1.37592	1.24308	0.963572	1.62986	1.37243	1.45895	1.01932	20.2687	2.96177
Nasp	0.629709	0.780727	0.897282	0.999241	0.94041	1.25697	1.01908	0.716472	1.60886
Klhl24	0.4893	0.819906	0.741273	0.927917	0.868257	0.984579	1.01876	0.65638	0.518702
Eif4g3	1.06393	0.955273	1.15361	1.03038	1.00987	1.17513	1.01843	0.895336	0.751562
Taok3	1.02705	1.03239	1.28408	0.919487	1.08139	1.14624	1.01623	0.656213	0.444662
Mtpn	1.33578	1.17503	1.25593	1.23205	1.19367	1.16383	1.01598	1.10898	1.26554
Tmx1	1.10114	1.19448	1.03513	1.13183	1.11607	1.16413	1.0156	0.862586	0.814644
Prr7	1.01643	0.776377	1.40067	1.26641	1.26691	1.21178	1.01375	0.349743	0.363458
Tiprl	1.13932	0.998556	1.13833	1.0327	1.11179	1.19773	1.01308	0.952105	0.810157
Eef1d	1.08162	0.817221	0.885158	1.12851	1.29837	1.24751	1.01306	3.30831	3.50153
Pigx	0.78688	0.996394	0.71109	1.14997	0.880189	0.815391	1.01257	0.549312	0.915501
1110065P20Rik	1.62722	1.30467	1.43956	1.43672	1.2127	1.15144	1.01101	0.609565	1.0189
Mapk3	1.83753	1.25526	0.888667	1.00522	1.13818	0.89264	1.0108	1.68008	1.11919
Rnf38	0.5015	0.637483	0.4806	0.682168	0.601165	0.543154	1.0102	0.324717	0.380458
Clcn3	0.960018	0.846921	0.96226	0.861247	1.11791	1.04758	1.00985	0.747379	0.546662
Praf2	0.860532	1.33244	1.0923	0.492035	0.41128	0.466074	1.00968	0.200446	0.988467
Apba2	1.0016	1.79465	1.45551	1.562	0.756405	0.845749	1.00941	0.308592	0.497697
Pdhb	1.12272	1.1251	1.22496	1.22276	1.32156	1.3192	1.00913	0.747606	0.828599
Dynlt1f	1.0561	1.31254	1.13718	1.21001	1.33672	1.28954	1.00878	0.395936	1.19487
Cadm3	0.886322	0.852902	1.30762	0.466647	0.769424	0.563345	1.00781	0.407257	0.259863
Map9	1.08526	0.74466	1.45215	1.09724	1.2852	1.37528	1.00662	0.494031	0.159739
Mrps14	1.19014	0.979492	0.985912	1.2124	0.919204	0.864964	1.00622	1.18386	1.4753
Acbd6	1.14645	1.00021	1.23884	0.973169	1.13491	1.15371	1.00551	0.744781	0.8231
Fbxo21	0.898648	0.821903	0.856689	0.816486	0.994336	1.04008	1.00531	0.300035	0.482645
Cfap20	1.02019	0.825389	0.917334	1.08026	1.15944	0.967125	1.00515	0.770544	1.22013
Rps19bp1	0.956776	0.956196	1.13955	0.869398	0.869432	0.873761	1.00509	0.473115	0.717119
Sdf4	0.78558	0.822042	0.702715	0.816185	0.627714	0.647552	1.00484	1.2651	1.2771
Vat1l	1.91099	0.924789	1.24455	0.709691	1.61194	1.22306	1.00456	0.806039	0.30198
Cuta	1.09929	1.05171	0.956816	1.33472	1.29661	1.37394	1.00391	1.42972	1.4681
Fzr1	0.846503	0.982019	1.02693	0.859493	0.912992	0.937384	1.00366	0.559112	0.705462
Cbx6	1.0086	0.771645	1.24293	1.07027	1.22027	0.993658	1.00335	0.534991	0.44437
Tpr	1.11767	1.05206	0.987358	1.19389	1.24219	1.1589	1.00332	1.13741	1.41754
Ctsb	1.04884	1.10482	1.41279	0.792673	0.979192	0.955869	1.00305	20.2017	4.70697
Cdc123	0.725893	0.916076	0.780996	0.761896	0.730566	0.70233	1.00187	0.612311	0.870354
Lmo3	0.716882	1.37779	0.527487	0.865265	0.299132	0.541727	1.00154	0.0832596	0.292114
Csnk2a1	1.01821	1.09413	0.911357	1.07612	1.23902	1.08531	1.00094	0.416272	0.828215
Trib2	0.355011	0.583286	0.721009	0.619136	0.686829	0.754126	1.00021	0.0535036	0.57365
Gna11	1.50591	1.01637	1.39767	1.36427	1.42511	1.78218	1.00018	0.623733	0.979579
Ik	0.793809	0.89262	0.756552	0.966957	1.10039	0.869857	1.00011	0.783348	0.7133
Cttn	0.930941	1.10051	0.826142	0.838398	0.675735	0.908137	0.999724	0.209464	0.885477
Mapk10	0.814131	0.912435	1.13256	0.775814	0.837864	0.604613	0.999545	0.226473	0.252974
Pgm2l1	1.11194	1.11748	2.14724	0.354257	0.525803	0.715584	0.998803	0.62123	0.348181
Churc1	1.58305	1.29176	0.935793	1.55468	1.75857	1.44154	0.998365	0.788967	1.03779
Svop	0.806315	0.787588	0.812941	0.698673	0.717041	0.858852	0.998218	0.267908	0.183133
Srpk1	0.858782	0.938233	0.790932	0.788231	0.799305	0.853615	0.998078	0.569399	0.692776
Usp14	1.02697	0.92189	0.826311	0.80794	0.931339	1.00429	0.99801	0.666022	0.790289
Pin4	0.931801	1.02609	0.928056	1.0932	0.884395	0.941064	0.99786	0.490231	0.607365
March1	0.370888	0.239379	1.08572	0.318068	0.405118	0.74034	0.996433	0.76655	0.129623
Rpn2	1.09479	1.08851	0.96965	0.867762	0.811457	0.80121	0.996422	1.82258	2.24338
Syt5	1.01238	0.670858	0.882626	0.882029	0.78845	1.53521	0.994949	0.2679	0.204856
Cox20	0.902346	1.07978	0.859663	1.29922	1.23862	0.967929	0.993523	0.27773	0.901425
Rnf146	0.561444	0.826484	0.703863	0.713146	0.560395	0.490572	0.99291	0.348106	0.587177
Fnta	1.01605	1.14911	0.960911	0.992313	0.84952	0.900148	0.992534	0.969251	1.0033
Ubap2l	1.13271	0.915452	0.907949	1.4177	1.25446	1.31736	0.991188	1.1473	1.19162
Cdk2ap1	0.803126	0.739777	0.476283	1.33799	0.888885	1.0168	0.989589	0.746969	1.20352
Nicn1	0.744005	0.939976	0.806063	0.663527	0.82524	0.992933	0.989258	0.228856	0.406364
Stk16	1.02665	0.930768	0.941945	1.09194	0.958781	1.21227	0.988893	0.536077	0.855391
Lamtor4	1.41628	1.30782	1.46574	1.25203	1.14516	1.21744	0.988832	2.42251	1.1694
Srp72	1.00177	1.0083	0.917253	0.998219	1.0779	1.05563	0.987949	0.713054	1.07
Ptn	3.68056	0.926686	2.83643	1.30001	1.0386	2.64351	0.987836	1.1033	14.1081
Leprotl1	0.748862	0.845628	0.60653	0.768288	0.654215	0.515031	0.985499	0.597526	0.682658
Ppp2r2d	0.982973	0.99969	1.14201	0.924625	0.900095	1.03441	0.985406	0.63736	0.605564
Sept6	0.771073	1.36899	1.00913	0.548317	0.480271	0.676325	0.985397	0.162801	0.514374
Rere	0.689458	0.682044	0.644163	0.749048	0.896796	0.734835	0.985035	0.554301	0.585623
Mapk8	0.46424	0.819681	0.758296	0.637159	0.589634	0.56694	0.983779	0.437944	0.41602
Ccdc184	1.11315	1.08756	1.40931	1.14955	1.32682	1.45978	0.983229	0.355482	0.188266
Mapk6	0.66529	0.879659	0.804508	0.834698	0.717386	0.821169	0.982521	0.398282	0.407951
Dnpep	0.638866	1.05925	0.568524	0.655077	0.51594	0.488046	0.981816	0.383278	0.91674
Chga	0.925249	0.851822	1.32892	0.773104	0.714538	0.743107	0.980919	0.427913	0.190008
Mapk8ip2	0.87252	0.922532	0.797371	0.732783	0.826428	0.721506	0.980919	0.331537	0.178587
St8sia2	0.708353	0.882993	1.49364	0.668035	0.612166	0.833187	0.980772	0.215251	0.381819
Cstf3	0.681541	0.667742	0.573202	0.834123	0.945262	0.815733	0.980399	0.343054	0.326616
Sap18	1.24305	1.0899	1.0713	1.37971	1.29822	1.35236	0.979831	1.16492	1.0125
Celf1	1.09119	1.09876	0.939062	1.34014	1.33629	1.26129	0.978876	0.796439	0.950435
Sgip1	0.721926	0.637008	1.09281	0.788022	0.973329	0.920384	0.978724	0.309551	0.228867
Ttyh3	0.527502	0.719102	1.00201	0.631392	0.45421	0.558998	0.978518	0.757565	0.894412
March6	1.19512	0.86673	1.44034	1.06779	1.23541	1.1888	0.978236	0.771108	0.921668
Dtd1	1.45829	0.836067	1.30992	1.00594	1.42267	1.90696	0.977442	0.628423	0.343037
Wdr83os	1.39363	1.18102	1.11403	1.05034	1.43424	1.38925	0.975821	1.17418	1.1137
Snca	1.3046	1.331	8.50882	0.309814	0.520411	1.14312	0.975172	0.686877	0.356309
Kif5a	1.10649	1.04028	1.30252	0.735042	0.818065	0.898057	0.974875	0.431753	0.319607
Nrsn2	1.63883	0.740044	0.835744	1.76234	1.58197	1.77295	0.974851	0.622985	0.297487
Syncrip	0.786561	0.877297	0.900958	1.02477	0.831826	0.852979	0.974706	0.767456	1.17203
U2surp	0.822559	0.886011	0.90424	0.944713	1.08655	1.12562	0.973987	0.845441	0.948352
Ssr3	0.945561	1.08199	0.912936	1.13293	1.04419	0.944655	0.973976	0.724547	2.22489
Gm28050	0.101047	0.112872	0.175016	0.0189377	0.0806218	0.11719	0.973941	0.0365541	0.0265499
Ctsd	0.757651	0.909915	0.911037	0.708461	0.680403	0.700203	0.97392	28.3524	3.18911
Herc1	0.803234	0.81445	1.1697	0.812515	1.10964	0.917992	0.9733	0.770686	0.492484
Tln1	1.16653	1.00804	1.08514	0.87673	0.972194	0.937232	0.973253	1.27993	0.7371
Atcay	0.899319	0.823017	1.01458	0.874211	0.810787	1.05512	0.973234	0.305833	0.251854
Gtf2i	1.14446	0.938958	0.850443	1.31206	1.35145	0.923755	0.968439	0.855398	1.28609
Psmd12	0.912585	1.04938	0.83855	0.903159	0.799496	1.03337	0.96785	0.637062	0.867135
Dctn5	0.677606	0.809738	0.613719	0.623344	0.494974	0.603519	0.966813	0.563739	0.563742
Psmc3	1.00921	1.20894	1.00197	1.05273	0.90159	0.888229	0.966639	1.01376	1.36966
Trim8	0.45085	0.643571	0.549959	0.869384	0.619944	0.432536	0.965436	1.20249	0.735457
Nsa2	1.35331	1.3316	1.02187	1.27396	1.35308	1.4849	0.964698	1.99424	1.52456
Ap2b1	1.18293	1.23633	1.21592	0.957209	1.105	0.955741	0.964674	0.570667	0.888849
Atp1a1	1.64115	0.97989	0.654184	1.0791	1.52393	1.31178	0.964336	1.57508	0.705039
Tardbp	0.792678	0.774592	0.757135	0.982705	1.04758	0.828189	0.964017	0.620568	1.05529
Mrpl32	0.897571	1.01496	1.07083	1.04396	0.971015	1.09834	0.963358	0.518661	0.818057
Sdha	1.00184	0.92365	0.974179	0.879712	1.03824	1.06495	0.963198	0.867191	1.1845
Fam241b	0.765126	0.8065	0.987014	0.615898	0.549351	0.821485	0.962672	0.174573	0.17717
Pqbp1	0.923904	0.928632	0.883527	1.05664	0.882885	1.03733	0.961515	0.537312	0.610701
Snw1	0.674522	0.800298	0.669342	0.974978	0.833525	0.878717	0.959824	0.86036	0.825289
Zfp637	0.718939	0.765586	0.910356	0.94258	0.788867	0.679723	0.959145	0.33146	0.866926
Abhd17a	1.15705	1.08117	1.5982	0.998844	0.998928	1.13839	0.958561	1.24583	0.851594
Eid2	1.3226	0.782075	1.36873	0.668977	0.850071	1.49929	0.958491	0.528258	0.422648
Fbl	1.09051	0.94498	0.784455	1.08638	1.08233	1.20667	0.95837	0.939293	1.30811
Pam	0.957136	0.59895	1.10995	0.449723	0.780217	0.44161	0.957458	0.490428	0.398808
Prpf40a	0.814736	0.900045	0.683147	0.995909	1.03535	0.8643	0.957328	1.06663	1.01305
Msantd4	0.576742	0.726709	0.408945	0.771223	0.529142	0.513558	0.956899	0.177837	0.399137
Nrp2	0.333155	0.829073	1.42768	0.467984	1.43726	1.45883	0.956432	0.493749	0.462996
Fam92a	1.30457	0.968047	1.31801	0.982538	1.08631	1.13253	0.956318	0.501256	1.17896
Mrpl13	0.838438	0.688974	0.764717	0.637886	0.686964	0.815152	0.954434	0.516768	0.823041
Tomm5	1.51709	1.14183	1.34042	1.05325	0.922615	1.0156	0.954026	0.720262	1.62151
Dhx15	0.708722	0.710358	0.61237	0.84465	0.733548	0.877959	0.953769	0.638272	0.677485
Use1	1.05582	1.15749	0.990312	1.54959	1.3975	1.28711	0.952669	1.02314	1.23925
Magoh	0.987377	0.969744	0.866738	1.36339	1.17061	1.35169	0.952614	0.851166	1.27651
Flywch2	0.769414	0.820016	0.896789	0.704753	0.91552	1.44266	0.951956	0.252005	0.379027
Ddb1	1.08605	1.16906	0.83668	0.989025	0.982311	0.889903	0.951447	0.743344	1.41726
Ahsa1	1.03959	0.82715	1.00127	1.01872	1.10622	1.14933	0.951042	0.699255	0.790756
Vim	4.15599	4.13531	0.726232	1.76484	1.83519	1.36318	0.950678	0.741806	13.0609
Tmem14c	1.4564	1.33202	1.18152	1.24947	1.04318	1.18045	0.950523	2.15424	1.98022
Ergic2	0.98777	1.16082	1.21062	0.985342	1.0402	1.02572	0.950403	0.805404	1.04452
Ppp2r5b	0.921295	1.00015	1.12705	0.808971	0.746623	0.722874	0.950257	0.271299	0.420735
Btbd10	0.74625	0.614779	0.829998	0.745519	0.67369	0.826789	0.950037	0.460161	0.340072
Lsm2	0.642602	0.766186	0.712248	0.606205	0.701411	0.983786	0.948917	0.52465	1.84481
Prkar2a	1.62255	1.48271	1.04931	1.24611	1.66468	1.39581	0.948747	0.638127	0.791006
Slc35b1	0.785569	0.790559	0.82215	0.909928	0.722568	0.709491	0.947837	0.491874	0.729182
Ggnbp2	0.890921	0.903524	0.882628	0.707296	0.72387	0.823669	0.94647	0.809848	0.872971
Zfp57	0.480176	0.584794	0.830706	0.453161	0.729804	0.620328	0.946077	0.136283	0.269753
Cdk5	0.889052	0.909072	0.936461	0.935202	0.862796	0.920644	0.944249	0.284731	0.442077
Map4	1.57028	1.2889	1.45043	0.668254	0.907709	0.96357	0.942576	0.976292	0.821929
Gm10076	1.0035	1.0366	0.813973	1.06917	0.966567	0.754205	0.942368	0.906834	1.54677
Rnf220	0.791636	0.753878	0.706337	0.783931	0.659391	0.612983	0.942291	0.56085	0.709375
Zmiz1	0.834946	0.954097	0.978325	0.963642	1.03609	0.919696	0.941434	0.953981	0.686319
Gmfb	0.771783	0.727045	0.987181	0.633385	0.614805	0.565304	0.940842	0.67473	0.528053
Mrpl21	0.883241	0.805603	0.810188	1.02103	0.890357	0.926323	0.940768	0.464852	1.06294
Ehmt1	0.632988	0.646432	0.55408	0.768629	0.706987	0.67589	0.940456	0.376231	0.611299
Ccar2	0.489295	0.594805	0.481067	0.718748	0.57422	0.584485	0.940258	0.230893	0.342692
Bloc1s6	0.716382	0.756373	0.740794	0.638731	0.633292	0.531828	0.940014	0.298394	0.464465
Arhgap33	0.726224	0.911515	0.800326	0.467111	0.677816	0.882322	0.939494	0.13794	0.260985
Sra1	1.13155	1.19006	0.919151	1.13928	0.98101	1.00856	0.938882	0.766283	1.24086
BC005624	0.615124	0.739265	0.717643	0.543428	0.610661	0.797464	0.937771	0.826185	0.557679
Usf2	0.690029	0.798357	0.813071	0.863582	0.793609	0.641741	0.937694	1.32156	0.943431
Cdipt	0.765283	0.757555	0.74858	0.628372	0.542022	0.630589	0.937462	0.548881	0.654098
Ddah1	0.754092	0.593847	1.15634	0.170414	0.295427	0.432885	0.937256	0.403365	0.601068
Lrrc4b	1.17114	0.740924	1.63517	0.880656	1.22602	1.58047	0.936328	0.576274	0.456504
Enho	1.4535	1.12372	2.00104	0.783887	0.894656	1.30477	0.936094	0.66734	0.826369
Timm17a	1.41303	1.01636	1.30481	1.26392	1.00173	1.13363	0.93582	0.974542	1.12336
Mrps12	1.22234	1.05431	1.08293	1.09582	0.991045	0.986127	0.935548	0.817279	0.986601
Trp53bp1	1.01101	0.804065	0.99834	1.20359	1.42762	1.41977	0.93536	0.549416	0.392594
Syn1	1.14615	1.08149	1.43971	0.832508	0.802139	0.93934	0.935162	0.270178	0.313902
Lsm5	1.14639	1.07203	1.20191	1.35085	1.28434	1.23756	0.934772	0.626071	1.73382
Nova1	0.375723	0.515758	1.82256	0.277949	0.537794	0.513571	0.93467	0.233917	0.223144
Ncbp2	0.9994	1.02926	0.761446	1.09405	1.00468	1.17538	0.933468	0.647011	0.886483
Zfp358	0.640133	0.824925	0.59797	0.865588	0.684682	0.727385	0.932859	0.164158	0.455368
Dynlt1a	1.37159	1.16395	1.57444	1.244	1.34169	1.37495	0.932386	0.413512	0.586862
Iscu	1.00575	0.936553	0.828215	1.15271	0.965551	0.881046	0.931689	1.81081	1.00342
Nrd1	0.685981	0.616761	0.62056	0.603045	0.590186	0.740481	0.930981	0.524822	0.640043
Sys1	1.15097	1.13765	1.33184	1.30359	1.26454	1.28261	0.93094	1.10038	1.46493
Btf3l4	0.518497	0.672058	0.541214	0.788631	0.675103	0.621411	0.930751	0.233375	0.392888
4933434E20Rik	0.960407	0.950499	0.710671	1.29132	1.08213	0.903156	0.930702	0.469029	0.849473
Bin1	1.04465	0.989099	1.13864	0.742648	1.0086	1.03142	0.930526	8.43005	1.28216
Cdc42se2	1.08495	0.859989	1.02317	1.205	1.03861	0.891477	0.929873	0.709435	0.616313
Prkcsh	0.658452	0.719516	0.75101	0.735131	0.804721	0.658476	0.928382	0.781576	0.876094
Rbm6	0.580151	0.610047	0.551431	0.844436	0.753587	0.752795	0.927912	0.40613	0.525161
Khdrbs2	0.367005	0.677382	0.555778	0.332841	0.766697	0.403292	0.927639	0.090772	0.143592
Ccdc50	0.842854	0.971574	0.928445	0.85092	0.990986	1.04719	0.926002	1.2717	0.665162
Ppp5c	0.682645	0.757794	0.743462	0.772627	0.659144	0.807821	0.925452	0.805623	0.669416
BC004004	0.796591	0.841089	0.772467	0.687666	0.627855	0.627133	0.925311	0.528851	0.837713
Ccdc12	1.09957	0.945298	0.758059	1.89779	1.22677	1.147	0.925234	1.27154	1.18838
Morn4	0.419117	0.718692	0.744286	0.32988	0.350743	0.340434	0.925183	0.109977	0.284994
Ctnnd2	0.816003	0.969489	1.41061	0.571263	0.930151	1.22217	0.924285	0.399605	0.391006
Dcaf7	1.08592	0.787165	1.31062	1.12395	1.14463	1.08931	0.923871	0.833106	0.622697
Tfg	1.01671	1.01549	0.982468	1.02906	0.860215	1.07139	0.923334	0.73034	0.981219
L1cam	1.5618	1.12865	1.29812	0.966964	1.30413	1.18843	0.92295	0.519432	0.466456
Slbp	0.823838	0.886339	0.962423	1.10828	1.00453	1.18254	0.922257	0.717253	1.14566
Nsmce4a	0.593518	0.704455	0.605356	0.865868	0.959192	0.929875	0.921164	0.806166	1.31168
Cend1	1.3201	1.28658	2.63875	0.614766	0.641034	0.752516	0.920749	0.524481	0.280093
Tmbim6	1.34496	1.12515	1.43599	1.28748	1.26296	1.11558	0.920416	4.54098	2.15934
Prr13	1.44413	1.33992	0.817877	1.01249	1.0407	0.767544	0.919928	0.79955	0.828102
Ptpn1	0.939938	0.975199	0.656857	0.96895	0.785912	1.03434	0.919834	1.85122	0.768134
Ptprf	0.770573	0.872863	0.852739	0.8702	0.882178	0.856626	0.919001	0.343739	0.740816
Pbx3	0.114418	0.688494	2.02322	0.0571454	0.128739	0.182547	0.91847	0.102812	0.457987
Cldnd1	0.992788	1.03234	1.06676	0.831895	0.794789	0.766948	0.917295	0.951904	1.20913
Prkar2b	1.02194	1.06397	1.00388	0.787629	0.861975	1.21905	0.916802	0.29211	0.389043
Apbb2	0.608599	0.709344	0.600601	0.958222	0.577528	0.847009	0.916181	0.341562	0.353658
Rnf2	0.580233	0.848097	0.636915	0.846463	0.854557	0.709674	0.916041	0.597884	0.560933
Tmem9	0.980685	0.839841	0.842473	0.957793	0.876879	0.812136	0.915768	0.592528	1.00245
Srrm3	0.489308	0.869131	0.741359	0.496969	0.653805	0.530623	0.914534	0.199906	0.185761
Thoc2	0.511746	0.578173	0.686352	0.741854	0.913891	0.717802	0.914309	0.748434	0.507245
Tomm40	1.19053	0.993639	1.22299	0.93391	0.858806	1.08583	0.913984	0.679372	1.18676
Abcf1	0.781046	0.796706	0.78994	0.832349	0.807551	0.77808	0.913876	0.523653	0.823732
Stx6	0.657077	0.647686	0.653045	0.915144	0.835207	0.704204	0.913745	0.616282	0.592435
Fbxo11	0.745154	0.654631	0.746455	0.78768	0.862179	0.794923	0.913452	0.56991	0.482031
Tug1	0.862885	0.8708	0.93037	1.07947	1.12478	0.95373	0.913431	0.522784	0.698623
Emc4	1.08607	1.06292	1.15383	0.939598	0.980306	1.15583	0.913394	0.602093	0.710559
Alyref	0.930869	0.672102	0.829266	0.992583	1.1257	1.13485	0.913182	1.34275	1.28579
Ppp2r2a	0.937473	0.918691	0.971444	0.962641	0.897085	0.93939	0.913133	0.648268	0.890516
Kif1bp	0.56846	0.601218	0.647942	0.559342	0.529124	0.552937	0.912482	0.559686	0.434867
Mrpl57	1.32505	1.21544	1.10647	1.29733	1.16889	1.17395	0.91226	0.678876	0.968435
Dnajc15	0.936675	0.833087	0.93322	0.604692	0.653538	0.880942	0.911776	0.547317	0.852482
Naa35	0.603726	0.668937	0.60533	0.620112	0.74112	0.656024	0.911394	0.636796	0.456448
Asna1	0.764234	0.900349	0.808305	0.952317	0.619638	0.613025	0.911026	0.577699	0.832857
Rtn2	0.976185	0.976634	0.978582	0.785635	0.884757	1.03246	0.910959	0.283473	0.336417
Gemin7	1.01587	1.07021	0.952299	1.01026	0.999543	0.923046	0.910537	0.491332	1.31223
Exoc5	0.692023	0.759569	0.687382	0.69774	0.678245	0.658901	0.910231	0.723862	0.598364
Bod1l	0.83324	0.783299	0.78965	0.96593	1.01492	1.11286	0.910215	0.960084	0.705622
Ptpra	0.889543	0.785853	1.06408	0.907148	0.783874	0.859485	0.910181	1.1584	1.17964
Dst	1.17936	1.01626	1.35062	0.629094	1.04703	0.924681	0.909719	1.40629	0.792646
Jakmip2	0.564565	0.703098	0.789232	0.503692	0.576335	0.617076	0.909204	0.184447	0.230137
Lamtor3	0.844334	0.754186	0.893025	0.683344	0.63238	0.531943	0.908168	0.653459	1.00101
Tusc2	0.932618	1.06143	1.37084	0.51203	0.391384	0.603318	0.906429	0.389134	0.729247
Nsd3	0.964951	0.795163	0.939597	0.935211	1.19025	1.24542	0.905902	1.01421	0.617721
Dnajc19	1.12376	0.962857	1.04748	0.886112	0.965414	1.03024	0.905839	0.985187	1.14731
Cadps	1.27216	0.948528	1.68288	0.818938	1.2933	1.07541	0.905341	0.607468	0.392244
Trafd1	0.538183	0.661342	0.624553	0.78926	0.726756	0.644938	0.904728	0.616356	0.506419
[truncated: 19,135 more rows]
