# Supplementary material for: Developmental single-cell transcriptomics of hypothalamic POMC neurons reveal the genetic trajectories of multiple neuropeptidergic phenotypes
Source: eLife. 2022 Jan 19;11:e72883. doi: 10.7554/eLife.72883 (PMC8806186; doi:10.7554/eLife.72883)
Supplement: Figure 1—figure supplement 3—source data 1. [file elife-72883-fig1-figsupp3-data1.xlsx]

## Sheet: DsRed-1
Figure 1-source data 4 (corresponding to Figure1-figure supplement 3). Feature genes that define each of the 9 DsRed
clusters integrated across all six developmental stages.
The data are sorted from highest to lowest for each integrated custer by average log fold-change > 0.25 (avg_logFC)
of gene expression in the featured cluster relative to all other clusters.
pct.1, Percentage of cells in the indicated cluster with significant differential gene expression
pct.2, Percentage of cells in all other clusters with significant differential gene expression
p-val, p-value
p_val_adj, adjusted p-value for multiple comparisons
The Wilcoxon test was performed to identify the differentially expressed genes in each cluster
Gene	p_val	avg_logFC	pct.1	pct.2	p_val_adj	cluster
Pomc	0	1.97498	0.937	0.502	0	DsRed-1
Six3	0	0.993916	0.951	0.291	0	DsRed-1
Calb1	0	0.964866	0.743	0.259	0	DsRed-1
Chchd10	0	0.823586	0.905	0.493	0	DsRed-1
Nkx2-1	0	0.803199	0.963	0.408	0	DsRed-1
Six6	0	0.705241	0.835	0.254	0	DsRed-1
S100a10	3.24489e-155	0.644453	0.792	0.486	7.12544e-151	DsRed-1
Syt4	6.42281e-213	0.588751	0.902	0.617	1.41038e-208	DsRed-1
Prdm12	0	0.586736	0.678	0.113	0	DsRed-1
Peg3	5.63276e-217	0.571708	0.98	0.773	1.2369e-212	DsRed-1
Arhgdig	5.39841e-166	0.512811	0.817	0.504	1.18544e-161	DsRed-1
Ptn	4.40731e-273	0.501666	0.933	0.58	9.678e-269	DsRed-1
Rnf128	6.98706e-199	0.465179	0.504	0.147	1.53429e-194	DsRed-1
Isl1	3.58118e-245	0.462239	0.93	0.406	7.86391e-241	DsRed-1
Sox2	2.72017e-268	0.461591	0.794	0.271	5.97321e-264	DsRed-1
Cbarp	1.25295e-76	0.458591	0.898	0.79	2.75136e-72	DsRed-1
Tagln2	1.2746e-133	0.457876	0.484	0.184	2.7989e-129	DsRed-1
Sox3	1.36264e-251	0.451414	0.627	0.187	2.99223e-247	DsRed-1
Nap1l5	2.49719e-36	0.449309	0.909	0.852	5.48358e-32	DsRed-1
Nr5a1	1.55934e-273	0.445786	0.4	0.031	3.42415e-269	DsRed-1
Gpx3	4.36504e-67	0.445589	0.612	0.45	9.58519e-63	DsRed-1
Nptx2	1.03835e-214	0.443282	0.588	0.194	2.28011e-210	DsRed-1
Vgf	6.43017e-71	0.440449	0.472	0.273	1.412e-66	DsRed-1
Cpne4	1.62935e-134	0.437029	0.583	0.288	3.5779e-130	DsRed-1
Cd44	1.26948e-259	0.433031	0.4	0.039	2.78765e-255	DsRed-1
Nell2	2.73067e-141	0.432607	0.831	0.572	5.99628e-137	DsRed-1
Mpped2	7.61137e-182	0.42804	0.959	0.692	1.67138e-177	DsRed-1
Irs4	1.99328e-68	0.419051	0.451	0.238	4.37704e-64	DsRed-1
Pea15a	1.09304e-205	0.41705	0.971	0.77	2.40021e-201	DsRed-1
Caly	2.58131e-37	0.397695	0.76	0.69	5.66829e-33	DsRed-1
Tspan17	7.73509e-142	0.396662	0.803	0.506	1.69855e-137	DsRed-1
Resp18	5.81345e-12	0.396207	0.782	0.804	1.27657e-07	DsRed-1
Ly6h	9.01473e-59	0.384348	0.986	0.946	1.97955e-54	DsRed-1
Slc25a5	4.082e-08	0.376	0.957	0.923	0.000896367	DsRed-1
Rpl22l1	1.04063e-195	0.374085	0.997	0.974	2.28511e-191	DsRed-1
Fxyd6	5.19231e-91	0.37299	0.991	0.952	1.14018e-86	DsRed-1
Rasgrf2	9.72031e-129	0.370146	0.521	0.218	2.13448e-124	DsRed-1
Thsd4	8.01932e-247	0.364842	0.529	0.12	1.76096e-242	DsRed-1
Tox2	3.5886e-207	0.36325	0.884	0.443	7.88021e-203	DsRed-1
Tle4	6.27747e-184	0.362557	0.896	0.558	1.37847e-179	DsRed-1
Calb2	1.36839e-78	0.36229	0.553	0.31	3.00486e-74	DsRed-1
Sox14	1.38588e-80	0.360645	0.446	0.2	3.04326e-76	DsRed-1
Nrgn	1.09006e-86	0.360553	0.39	0.159	2.39367e-82	DsRed-1
Nenf	3.99568e-69	0.359162	0.933	0.874	8.77412e-65	DsRed-1
Vat1l	4.05748e-157	0.352649	0.865	0.533	8.90982e-153	DsRed-1
H2-Ab1	1.94615e-158	0.352359	0.258	0.023	4.27356e-154	DsRed-1
Car10	5.86861e-62	0.351055	0.526	0.339	1.28869e-57	DsRed-1
Pcsk1n	2.20032e-87	0.347752	0.998	0.971	4.83169e-83	DsRed-1
Kcnk12	1.18254e-223	0.340252	0.599	0.185	2.59675e-219	DsRed-1
Khdrbs3	4.86635e-90	0.335511	0.779	0.526	1.0686e-85	DsRed-1
Igfbp5	6.40634e-172	0.333752	0.686	0.295	1.40677e-167	DsRed-1
Ahi1	7.20266e-47	0.329946	0.897	0.79	1.58163e-42	DsRed-1
Ppp1r1a	1.67539e-145	0.329532	0.902	0.708	3.67898e-141	DsRed-1
Syp	1.037e-62	0.324823	0.819	0.7	2.27715e-58	DsRed-1
Tbx3	7.23876e-77	0.322569	0.624	0.376	1.58956e-72	DsRed-1
Shtn1	1.04654e-158	0.318242	0.715	0.362	2.2981e-154	DsRed-1
Gaa	5.79508e-58	0.315418	0.632	0.454	1.27254e-53	DsRed-1
Bex2	6.72213e-73	0.313968	0.998	0.984	1.47611e-68	DsRed-1
Pkib	1.90109e-155	0.311762	0.45	0.14	4.17461e-151	DsRed-1
Rac3	4.88529e-87	0.30843	0.942	0.844	1.07276e-82	DsRed-1
Fabp5	4.78387e-128	0.308312	0.997	0.971	1.05049e-123	DsRed-1
Impact	1.17821e-36	0.307995	0.602	0.461	2.58723e-32	DsRed-1
Rbp1	3.82988e-42	0.307488	0.481	0.299	8.41003e-38	DsRed-1
Bex1	1.42434e-112	0.306652	0.974	0.897	3.12771e-108	DsRed-1
Lxn	1.39276e-35	0.30354	0.436	0.305	3.05837e-31	DsRed-1
Ass1	4.03731e-150	0.301693	0.583	0.241	8.86552e-146	DsRed-1
mt-Nd4l	2.63161e-41	0.300056	0.828	0.719	5.77876e-37	DsRed-1
Hap1	7.03155e-81	0.299516	0.916	0.673	1.54406e-76	DsRed-1
Serp2	2.33236e-66	0.299189	0.904	0.824	5.12163e-62	DsRed-1
Ptprn	5.10007e-51	0.298913	0.682	0.528	1.11992e-46	DsRed-1
Tceal3	1.69981e-77	0.297413	0.754	0.545	3.73262e-73	DsRed-1
Bex4	2.81139e-109	0.294774	0.946	0.843	6.17352e-105	DsRed-1
Rrad	3.84972e-89	0.291437	0.461	0.208	8.45361e-85	DsRed-1
Ube2m	1.27985e-57	0.291247	0.89	0.8	2.81042e-53	DsRed-1
Pde10a	4.74409e-91	0.290598	0.624	0.371	1.04176e-86	DsRed-1
Robo2	1.73288e-66	0.288406	0.587	0.372	3.80522e-62	DsRed-1
Prkce	1.01682e-120	0.288322	0.724	0.408	2.23283e-116	DsRed-1
Shisa8	1.21038e-75	0.287032	0.279	0.097	2.65787e-71	DsRed-1
Klhl2	1.24389e-142	0.280959	0.733	0.399	2.73146e-138	DsRed-1
Atp1b1	3.46569e-23	0.280639	0.845	0.809	7.61031e-19	DsRed-1
Mapk3	6.58347e-76	0.27981	0.864	0.733	1.44566e-71	DsRed-1
Pcbd1	3.38257e-79	0.274857	0.83	0.651	7.42778e-75	DsRed-1
Pten	2.18218e-58	0.273553	0.823	0.706	4.79184e-54	DsRed-1
Klf6	5.63544e-92	0.272546	0.806	0.544	1.23749e-87	DsRed-1
Camk2n2	1.61213e-41	0.272488	0.672	0.542	3.54009e-37	DsRed-1
Hspe1	2.05569e-139	0.269583	0.988	0.955	4.51409e-135	DsRed-1
Tox	8.06871e-130	0.266453	0.674	0.322	1.77181e-125	DsRed-1
Prox1	9.64507e-127	0.266303	0.555	0.239	2.11796e-122	DsRed-1
Nop10	1.25719e-107	0.265115	0.974	0.911	2.76065e-103	DsRed-1
Aprt	9.18413e-102	0.264058	0.924	0.769	2.01674e-97	DsRed-1
Cda	2.45559e-161	0.264006	0.442	0.125	5.39224e-157	DsRed-1
B230209E15Rik	2.16026e-54	0.26045	0.495	0.3	4.74372e-50	DsRed-1
Gabra5	1.36123e-82	0.260011	0.598	0.339	2.98913e-78	DsRed-1
Nrsn2	2.77836e-54	0.258502	0.755	0.576	6.10101e-50	DsRed-1
Camk2a	3.05134e-115	0.255724	0.573	0.28	6.70044e-111	DsRed-1
Nr0b1	3.19227e-129	0.255542	0.277	0.049	7.00991e-125	DsRed-1
Ncald	2.1933e-51	0.255099	0.72	0.538	4.81628e-47	DsRed-1
Sult4a1	1.07244e-64	0.253294	0.702	0.512	2.35497e-60	DsRed-1
Syn2	2.76135e-58	0.252005	0.541	0.326	6.06365e-54	DsRed-1
Zim1	1.43887e-145	0.249548	0.572	0.232	3.15962e-141	DsRed-1
Vat1	2.87284e-62	0.249207	0.886	0.797	6.30846e-58	DsRed-1
Plagl1	1.42374e-65	0.248543	0.336	0.151	3.12638e-61	DsRed-1
Atp1a1	1.20627e-43	0.247216	0.712	0.591	2.64885e-39	DsRed-1
Spint2	7.29183e-44	0.246723	0.665	0.498	1.60121e-39	DsRed-1
Prox1os	2.46195e-149	0.246488	0.438	0.131	5.40621e-145	DsRed-1
Grb10	1.47305e-88	0.245849	0.725	0.469	3.23467e-84	DsRed-1
Rab3a	9.96827e-70	0.245489	0.974	0.919	2.18893e-65	DsRed-1

## Sheet: DsRed-2
Figure 1-source data 4 (corresponding to Figure1-figure supplement 3) Feature genes that define each of the 9 DsRed
clusters integrated across all six developmental stages.
The data are sorted from highest to lowest for each integrated custer by average log fold-change > 0.25 (avg_logFC)
of gene expression in the featured cluster relative to all other clusters.
pct.1, Percentage of cells in the indicated cluster with significant differential gene expression
pct.2, Percentage of cells in all other clusters with significant differential gene expression
p-val, p-value
p_val_adj, adjusted p-value for multiple comparisons
The Wilcoxon test was performed to identify the differentially expressed genes in each cluster
Gene	p_val	avg_logFC	pct.1	pct.2	p_val_adj	cluster
Crabp1	3.2376e-115	2.32913	0.35	0.108	7.10945e-111	DsRed-2
Sncg	0	1.91558	0.741	0.163	0	DsRed-2
Ebf1	0	1.85067	0.773	0.114	0	DsRed-2
Nefm	0	1.59497	0.849	0.412	0	DsRed-2
Nefl	0	1.41052	0.96	0.63	0	DsRed-2
Pou4f1	0	1.35694	0.478	0.036	0	DsRed-2
Lhx9	0	1.2574	0.461	0.037	0	DsRed-2
Irx2	0	1.19064	0.6	0.053	0	DsRed-2
D930028M14Rik	0	1.16601	0.835	0.235	0	DsRed-2
Necab2	6.69057e-62	1.1606	0.702	0.548	1.46918e-57	DsRed-2
Zic1	1.51569e-301	1.15582	0.483	0.068	3.32831e-297	DsRed-2
Onecut2	0	1.1554	0.758	0.223	0	DsRed-2
Crabp2	1.95034e-190	1.14624	0.626	0.248	4.28276e-186	DsRed-2
Cartpt	1.34651e-104	1.03537	0.396	0.141	2.95681e-100	DsRed-2
Ina	3.53533e-281	0.995226	0.988	0.923	7.76323e-277	DsRed-2
Nwd2	4.03939e-176	0.954185	0.482	0.155	8.87009e-172	DsRed-2
Tcf7l2	1.55501e-25	0.94402	0.472	0.44	3.41464e-21	DsRed-2
Nrn1	0	0.928532	0.6	0.129	0	DsRed-2
Meis2	4.47952e-152	0.916157	0.242	0.027	9.83657e-148	DsRed-2
Gng8	1.74375e-275	0.916091	0.383	0.036	3.82911e-271	DsRed-2
Cbln2	2.30147e-145	0.879405	0.568	0.245	5.0538e-141	DsRed-2
Mab21l2	0	0.832161	0.546	0.062	0	DsRed-2
Olfm1	0	0.827109	0.969	0.7	0	DsRed-2
Ddah2	1.17796e-231	0.78584	0.938	0.838	2.58668e-227	DsRed-2
Hbb-y	2.01188e-170	0.78338	0.776	0.37	4.41789e-166	DsRed-2
Nr4a2	2.69608e-123	0.78092	0.546	0.249	5.92033e-119	DsRed-2
Tspan13	5.528e-115	0.778925	0.988	0.937	1.21389e-110	DsRed-2
Pou6f2	0	0.755286	0.684	0.159	0	DsRed-2
Irx1	0	0.690702	0.503	0.05	0	DsRed-2
Mir124-2hg	0	0.678827	0.706	0.167	0	DsRed-2
Cd24a	4.64933e-161	0.676247	0.883	0.712	1.02095e-156	DsRed-2
Tuba1a	1.81683e-207	0.666119	1	0.999	3.98958e-203	DsRed-2
Islr2	1.06888e-140	0.658596	0.78	0.442	2.34714e-136	DsRed-2
Tppp3	3.15464e-133	0.616918	0.914	0.735	6.92728e-129	DsRed-2
Pcp4	0.000378316	0.606832	0.552	0.613	1	DsRed-2
Nhlh2	1.59214e-123	0.60002	0.938	0.707	3.49618e-119	DsRed-2
Cnn3	9.82936e-175	0.599791	0.772	0.429	2.15843e-170	DsRed-2
Igfbpl1	2.11053e-70	0.57942	0.643	0.408	4.63452e-66	DsRed-2
Trp53i11	1.06001e-119	0.578191	0.794	0.541	2.32768e-115	DsRed-2
Cotl1	3.02335e-189	0.571811	0.974	0.84	6.63897e-185	DsRed-2
Elavl4	3.73877e-202	0.567978	0.992	0.927	8.20997e-198	DsRed-2
Lamp5	3.55169e-19	0.56712	0.121	0.055	7.79916e-15	DsRed-2
Rgmb	5.04082e-162	0.566036	0.84	0.54	1.10691e-157	DsRed-2
Kitl	5.23655e-55	0.564806	0.251	0.102	1.14989e-50	DsRed-2
Zic4	5.19466e-214	0.564053	0.335	0.038	1.14069e-209	DsRed-2
Dmrtb1	1.99375e-243	0.561329	0.479	0.091	4.37808e-239	DsRed-2
Thsd7a	1.50339e-238	0.554997	0.693	0.257	3.30129e-234	DsRed-2
Tubb3	1.04367e-186	0.543621	1	0.987	2.2918e-182	DsRed-2
Tfap2b	9.88243e-80	0.536794	0.127	0.013	2.17008e-75	DsRed-2
Cxxc5	4.37569e-181	0.522632	0.79	0.42	9.60859e-177	DsRed-2
Hbb-bh1	2.6949e-107	0.520123	0.453	0.161	5.91773e-103	DsRed-2
Pantr1	0	0.516741	0.502	0.065	0	DsRed-2
Hba-x	3.30647e-111	0.503244	0.513	0.203	7.26067e-107	DsRed-2
Ckb	1.11851e-176	0.500795	0.985	0.913	2.45613e-172	DsRed-2
Homer2	1.92526e-178	0.495577	0.625	0.26	4.22768e-174	DsRed-2
Cacnb3	6.77365e-112	0.495138	0.912	0.765	1.48743e-107	DsRed-2
Clic1	5.77649e-131	0.490182	0.66	0.321	1.26846e-126	DsRed-2
Map1b	1.62389e-171	0.490064	0.999	0.985	3.5659e-167	DsRed-2
Parvb	2.81048e-184	0.481991	0.676	0.307	6.17153e-180	DsRed-2
Hba-a1	2.9087e-135	0.481242	0.706	0.339	6.38721e-131	DsRed-2
St6galnac5	4.03765e-115	0.47138	0.438	0.174	8.86627e-111	DsRed-2
Actg1	2.30909e-169	0.463153	1	1	5.07054e-165	DsRed-2
Vav3	1.12465e-191	0.455612	0.528	0.166	2.46962e-187	DsRed-2
Tac1	5.53449e-44	0.455166	0.339	0.178	1.21532e-39	DsRed-2
Nt5dc2	1.01201e-126	0.448951	0.867	0.627	2.22228e-122	DsRed-2
Ube2e3	2.68359e-107	0.446202	0.99	0.958	5.8929e-103	DsRed-2
1810041L15Rik	2.88023e-136	0.435983	0.594	0.289	6.3247e-132	DsRed-2
Cited2	1.45126e-90	0.430572	0.848	0.662	3.18681e-86	DsRed-2
Vstm2b	1.59179e-61	0.42857	0.543	0.356	3.49542e-57	DsRed-2
Tagln3	8.38783e-124	0.426192	0.993	0.949	1.84188e-119	DsRed-2
Irx5	4.21989e-217	0.420789	0.422	0.071	9.26646e-213	DsRed-2
Nr2f2	1.1724e-109	0.415514	0.438	0.163	2.57447e-105	DsRed-2
Dcx	1.42659e-120	0.398121	0.965	0.851	3.13265e-116	DsRed-2
Plppr1	2.22391e-120	0.394367	0.629	0.322	4.88348e-116	DsRed-2
C130073E24Rik	2.05902e-63	0.392628	0.548	0.34	4.5214e-59	DsRed-2
Phox2b	1.44738e-112	0.384991	0.151	0.009	3.1783e-108	DsRed-2
Tmem163	5.62345e-85	0.384572	0.644	0.394	1.23485e-80	DsRed-2
Robo3	1.36441e-119	0.382284	0.171	0.013	2.99612e-115	DsRed-2
Hist3h2a	7.68909e-106	0.380748	0.806	0.54	1.68845e-101	DsRed-2
Lhx1os	3.21209e-61	0.379297	0.143	0.028	7.05342e-57	DsRed-2
Ctnnb1	2.77539e-86	0.37757	0.923	0.77	6.09448e-82	DsRed-2
Lmo3	5.74769e-43	0.375004	0.554	0.397	1.26214e-38	DsRed-2
Bzw2	1.09473e-92	0.370647	0.949	0.844	2.40391e-88	DsRed-2
Clmp	3.21543e-93	0.369556	0.752	0.527	7.06076e-89	DsRed-2
Hba-a2	1.34177e-118	0.368071	0.656	0.305	2.94639e-114	DsRed-2
Irx3	8.14294e-172	0.365548	0.35	0.063	1.78811e-167	DsRed-2
Tubb2b	4.77858e-119	0.364011	1	0.996	1.04933e-114	DsRed-2
Tubb4a	2.99869e-124	0.361823	0.967	0.848	6.58482e-120	DsRed-2
Cplx2	6.30506e-50	0.361386	0.595	0.422	1.38453e-45	DsRed-2
Gap43	5.59506e-85	0.360948	0.996	0.96	1.22862e-80	DsRed-2
Ube2d1	4.6391e-127	0.360004	0.971	0.839	1.0187e-122	DsRed-2
3632451O06Rik	2.7099e-104	0.35992	0.571	0.283	5.95068e-100	DsRed-2
Bmp7	6.54668e-153	0.355376	0.431	0.118	1.43758e-148	DsRed-2
Tesc	1.17098e-61	0.354492	0.379	0.191	2.57135e-57	DsRed-2
Mmd2	8.49279e-73	0.354447	0.628	0.442	1.86493e-68	DsRed-2
Hist3h2ba	3.62969e-81	0.352405	0.984	0.92	7.97043e-77	DsRed-2
Cdo1	1.0686e-55	0.351772	0.648	0.44	2.34655e-51	DsRed-2
Idh1	4.83549e-86	0.349597	0.961	0.859	1.06183e-81	DsRed-2
Wbp1	9.06263e-116	0.347124	0.86	0.617	1.99006e-111	DsRed-2
Taf13	5.90667e-142	0.345574	0.735	0.426	1.29705e-137	DsRed-2
Tmem2	2.90274e-135	0.345533	0.623	0.282	6.37414e-131	DsRed-2
Runx1t1	4.6896e-82	0.345214	0.887	0.691	1.02979e-77	DsRed-2
Msi2	4.27747e-54	0.345121	0.797	0.647	9.3929e-50	DsRed-2
Gabbr1	6.48908e-22	0.34508	0.943	0.873	1.42494e-17	DsRed-2
Prph	7.82298e-58	0.344803	0.19	0.056	1.71785e-53	DsRed-2
Rprm	2.05951e-71	0.343716	0.769	0.561	4.52247e-67	DsRed-2
Nkx6-1	6.75057e-81	0.340536	0.134	0.015	1.48236e-76	DsRed-2
Ubald2	1.31797e-94	0.337603	0.932	0.799	2.89414e-90	DsRed-2
Klc1	3.81097e-137	0.329829	0.993	0.953	8.36851e-133	DsRed-2
Ptma	1.17778e-107	0.329593	1	0.999	2.58628e-103	DsRed-2
Tmeff1	4.78461e-89	0.32921	0.973	0.864	1.05065e-84	DsRed-2
Chst8	1.44111e-102	0.328799	0.528	0.251	3.16454e-98	DsRed-2
Atat1	9.27305e-97	0.32847	0.958	0.816	2.03627e-92	DsRed-2
Fdft1	1.03676e-62	0.327268	0.911	0.773	2.27661e-58	DsRed-2
Nrep	1.85704e-91	0.327118	0.903	0.684	4.07787e-87	DsRed-2
Nr2f1	8.7283e-92	0.323309	0.343	0.113	1.91665e-87	DsRed-2
Apba2	1.34917e-90	0.323203	0.878	0.688	2.96264e-86	DsRed-2
Sept6	2.72589e-91	0.320218	0.805	0.56	5.98578e-87	DsRed-2
Dpysl3	6.24127e-89	0.319616	0.993	0.934	1.37052e-84	DsRed-2
Tubb5	4.37194e-107	0.319458	1	0.999	9.60034e-103	DsRed-2
Hmgcs1	9.0627e-66	0.31927	0.971	0.87	1.99008e-61	DsRed-2
Cox5a	7.9068e-79	0.31411	0.995	0.97	1.73625e-74	DsRed-2
Carhsp1	3.14952e-68	0.312572	0.847	0.659	6.91604e-64	DsRed-2
Ifitm2	1.11419e-82	0.311371	0.396	0.161	2.44664e-78	DsRed-2
Ptprr	8.02009e-69	0.307814	0.326	0.139	1.76113e-64	DsRed-2
Chrna3	4.28393e-175	0.306502	0.407	0.095	9.40709e-171	DsRed-2
Wif1	2.05959e-115	0.305442	0.201	0.026	4.52264e-111	DsRed-2
Stmn2	5.25253e-112	0.304687	0.999	0.982	1.1534e-107	DsRed-2
Ldhb	2.36673e-40	0.30452	0.942	0.883	5.19711e-36	DsRed-2
Serf2	6.46751e-83	0.303097	0.995	0.962	1.4202e-78	DsRed-2
Syt6	5.71287e-117	0.302829	0.231	0.038	1.25449e-112	DsRed-2
Crmp1	1.26094e-74	0.301758	0.99	0.952	2.76889e-70	DsRed-2
Klhl13	4.17787e-97	0.296639	0.723	0.432	9.17419e-93	DsRed-2
Ap3s1	1.05775e-91	0.295627	0.954	0.848	2.32271e-87	DsRed-2
Nrg1	3.83821e-104	0.295493	0.514	0.241	8.42832e-100	DsRed-2
Asic1	1.28413e-108	0.292781	0.649	0.362	2.81982e-104	DsRed-2
Acat2	2.11179e-62	0.290761	0.925	0.804	4.63729e-58	DsRed-2
Lef1	1.28493e-90	0.289708	0.281	0.081	2.82158e-86	DsRed-2
Gdi1	8.73919e-74	0.285273	0.99	0.946	1.91904e-69	DsRed-2
Zfp811	5.08198e-107	0.283977	0.64	0.348	1.11595e-102	DsRed-2
Asic4	2.95268e-170	0.282588	0.279	0.033	6.48378e-166	DsRed-2
Tmsb4x	5.03863e-138	0.280296	1	0.999	1.10643e-133	DsRed-2
Tax1bp3	6.56071e-72	0.279033	0.784	0.541	1.44067e-67	DsRed-2
Ebf3	6.01181e-155	0.278958	0.449	0.116	1.32013e-150	DsRed-2
Chst2	9.24698e-69	0.278655	0.58	0.313	2.03055e-64	DsRed-2
Ppp1r14a	6.83272e-86	0.277631	0.215	0.046	1.5004e-81	DsRed-2
Atp5o.1	7.05383e-82	0.274869	0.986	0.946	1.54895e-77	DsRed-2
Elmo1	3.48745e-89	0.274776	0.719	0.435	7.65808e-85	DsRed-2
2510009E07Rik	2.45072e-89	0.274623	0.547	0.289	5.38153e-85	DsRed-2
Smarcd1	1.03325e-87	0.272689	0.822	0.582	2.26892e-83	DsRed-2
Praf2	2.52703e-81	0.272642	0.836	0.616	5.5491e-77	DsRed-2
Cdkn1c	1.3641e-92	0.272415	0.805	0.533	2.99544e-88	DsRed-2
Shox2	1.10534e-117	0.270766	0.24	0.041	2.42722e-113	DsRed-2
Lbx1	8.6908e-55	0.269756	0.105	0.015	1.90841e-50	DsRed-2
Fam78b	3.77497e-79	0.268168	0.556	0.31	8.28945e-75	DsRed-2
Rbms3	5.53754e-43	0.268121	0.48	0.33	1.21599e-38	DsRed-2
Robo1	9.57747e-73	0.267511	0.615	0.371	2.10312e-68	DsRed-2
Igdcc3	5.7804e-150	0.267498	0.352	0.077	1.26932e-145	DsRed-2
Lhx1	4.3442e-54	0.267058	0.115	0.019	9.53943e-50	DsRed-2
Fam57b	6.45442e-69	0.266076	0.924	0.766	1.41733e-64	DsRed-2
Id2	4.04762e-21	0.265799	0.45	0.332	8.88817e-17	DsRed-2
Cttnbp2	3.33111e-45	0.2653	0.58	0.407	7.31479e-41	DsRed-2
Rundc3a	6.00794e-80	0.264505	0.973	0.897	1.31928e-75	DsRed-2
Map1lc3b	4.60005e-89	0.264484	0.988	0.963	1.01012e-84	DsRed-2
Ciapin1	3.06485e-78	0.263198	0.906	0.768	6.73009e-74	DsRed-2
Garem2	5.71787e-185	0.262721	0.366	0.065	1.25559e-180	DsRed-2
Pou3f3	7.01942e-168	0.260862	0.32	0.05	1.54139e-163	DsRed-2
Pkm	8.99587e-49	0.259645	0.99	0.973	1.9754e-44	DsRed-2
Eya1	1.40519e-34	0.258322	0.168	0.066	3.08566e-30	DsRed-2
Mmd	6.84576e-75	0.256207	0.842	0.638	1.50326e-70	DsRed-2
Cfl1	7.22504e-113	0.256069	1	0.999	1.58655e-108	DsRed-2
Ywhaq	2.49371e-99	0.254851	0.999	0.991	5.47594e-95	DsRed-2
Fscn1	1.17895e-69	0.25469	0.992	0.954	2.58885e-65	DsRed-2
Klf7	3.7014e-52	0.254211	0.935	0.845	8.1279e-48	DsRed-2
Tfap2a	7.89235e-69	0.252826	0.121	0.015	1.73308e-64	DsRed-2
Pcbp3	2.02127e-58	0.252568	0.592	0.405	4.4385e-54	DsRed-2
Pou3f4	2.12762e-175	0.252442	0.387	0.074	4.67205e-171	DsRed-2
Rpp25	9.23967e-05	0.251599	0.134	0.103	1	DsRed-2
Serf1	8.13386e-64	0.249799	0.995	0.955	1.78611e-59	DsRed-2
Rnf114	5.49324e-80	0.249442	0.656	0.403	1.20626e-75	DsRed-2
Mllt11	4.59534e-100	0.249428	0.999	0.978	1.00909e-95	DsRed-2
Gabarap	7.71583e-107	0.248272	0.998	0.99	1.69432e-102	DsRed-2
Phf21b	1.6515e-91	0.248236	0.461	0.189	3.62653e-87	DsRed-2
Tmem35a	1.57892e-21	0.247969	0.596	0.447	3.46714e-17	DsRed-2
Ccnjl	1.11274e-112	0.246944	0.37	0.114	2.44346e-108	DsRed-2
Rem2	4.85951e-54	0.246403	0.63	0.411	1.0671e-49	DsRed-2
Cyth2	7.54475e-58	0.245567	0.948	0.87	1.65675e-53	DsRed-2

## Sheet: DsRed-3
Figure 1-source data 4 (corresponding to Figure1-figure supplement 3). Feature genes that define each of the 9 DsRed
clusters integrated across all six developmental stages.
The data are sorted from highest to lowest for each integrated custer by average log fold-change > 0.25 (avg_logFC)
of gene expression in the featured cluster relative to all other clusters.
pct.1, Percentage of cells in the indicated cluster with significant differential gene expression
pct.2, Percentage of cells in all other clusters with significant differential gene expression
p-val, p-value
p_val_adj, adjusted p-value for multiple comparisons
The Wilcoxon test was performed to identify the differentially expressed genes in each cluster
Gene	p_val	avg_logFC	pct.1	pct.2	p_val_adj	cluster
C1ql1	6.39952e-115	1.67535	0.486	0.103	1.40527e-110	DsRed-3
Snca	1.39262e-116	1.50122	0.828	0.499	3.05806e-112	DsRed-3
Nr4a2	7.22195e-213	1.34309	0.943	0.28	1.58587e-208	DsRed-3
Dmrta2	0	1.15435	0.825	0.066	0	DsRed-3
Mt3	2.85237e-58	1.12244	0.766	0.542	6.26351e-54	DsRed-3
Lmo4	1.81263e-113	1.07526	0.771	0.316	3.98035e-109	DsRed-3
Ebf2	0	1.06428	0.817	0.121	0	DsRed-3
Sncb	3.29017e-42	0.939508	0.722	0.507	7.22488e-38	DsRed-3
Lmx1a	0	0.939446	0.797	0.046	0	DsRed-3
Epha5	1.64901e-72	0.922506	0.746	0.434	3.62105e-68	DsRed-3
Fxyd7	1.42264e-47	0.911033	0.73	0.517	3.12398e-43	DsRed-3
Selenom	9.22372e-29	0.910521	0.602	0.465	2.02544e-24	DsRed-3
Tcf4	2.84974e-83	0.88258	0.81	0.52	6.25773e-79	DsRed-3
Bcl11a	9.29842e-92	0.870048	0.877	0.502	2.04184e-87	DsRed-3
Foxa1	0	0.868903	0.661	0.059	0	DsRed-3
Phlda1	9.01835e-105	0.868082	0.848	0.442	1.98034e-100	DsRed-3
Chst2	1.40321e-86	0.868032	0.746	0.355	3.08131e-82	DsRed-3
Elavl2	3.04299e-144	0.847286	0.964	0.684	6.6821e-140	DsRed-3
Ebf3	6.12393e-169	0.846978	0.694	0.165	1.34475e-164	DsRed-3
Slc17a6	1.37076e-101	0.845992	0.787	0.442	3.01005e-97	DsRed-3
Pbx3	5.96492e-144	0.845054	0.805	0.284	1.30984e-139	DsRed-3
Cadm1	1.52586e-89	0.831299	0.951	0.706	3.35063e-85	DsRed-3
Cbln2	5.01189e-57	0.828003	0.638	0.305	1.10056e-52	DsRed-3
Chl1	5.51013e-112	0.820487	0.846	0.441	1.20997e-107	DsRed-3
Sybu	9.65194e-99	0.798289	0.802	0.443	2.11947e-94	DsRed-3
Cdk14	5.92108e-114	0.776411	0.838	0.444	1.30021e-109	DsRed-3
Rmst	4.55654e-99	0.763305	0.931	0.634	1.00057e-94	DsRed-3
Camk2n1	5.56169e-104	0.754521	0.959	0.756	1.22129e-99	DsRed-3
Klhl1	1.25604e-255	0.748057	0.746	0.122	2.75814e-251	DsRed-3
Nxph4	0	0.743441	0.715	0.064	0	DsRed-3
Pitx2	6.20083e-128	0.740205	0.424	0.066	1.36164e-123	DsRed-3
Pdzrn4	2.50499e-259	0.734433	0.707	0.103	5.50071e-255	DsRed-3
Cadm2	2.55685e-72	0.714946	0.668	0.336	5.61458e-68	DsRed-3
Prkcb	2.68275e-71	0.714015	0.707	0.41	5.89106e-67	DsRed-3
Vsnl1	1.23932e-49	0.706567	0.632	0.327	2.72143e-45	DsRed-3
A2ml1	2.09094e-111	0.701653	0.527	0.132	4.5915e-107	DsRed-3
Uncx	3.31842e-302	0.678226	0.784	0.093	7.28692e-298	DsRed-3
Ntng1	7.66009e-77	0.677716	0.763	0.415	1.68208e-72	DsRed-3
Dner	1.90597e-92	0.677318	0.951	0.788	4.18531e-88	DsRed-3
Auts2	1.97777e-91	0.677264	0.943	0.694	4.34299e-87	DsRed-3
Nova1	2.28606e-106	0.676199	0.835	0.443	5.01996e-102	DsRed-3
Cbln1	1.64158e-76	0.675263	0.656	0.275	3.60475e-72	DsRed-3
Cntn1	2.46325e-29	0.665382	0.612	0.456	5.40905e-25	DsRed-3
Camk2n2	1.90893e-34	0.6614	0.766	0.586	4.19182e-30	DsRed-3
C130021I20Rik	0	0.659569	0.733	0.049	0	DsRed-3
Glra2	5.55352e-169	0.634297	0.663	0.143	1.2195e-164	DsRed-3
Myt1l	7.50501e-80	0.631133	0.895	0.647	1.64803e-75	DsRed-3
Pdzrn3	0	0.627619	0.64	0.052	0	DsRed-3
Serpine2	7.26787e-96	0.627171	0.774	0.315	1.59595e-91	DsRed-3
Fam19a5	7.69324e-63	0.624632	0.715	0.397	1.68936e-58	DsRed-3
Enc1	7.5485e-58	0.616336	0.771	0.521	1.65757e-53	DsRed-3
Fut9	8.42514e-66	0.608959	0.573	0.256	1.85008e-61	DsRed-3
Stum	4.54478e-205	0.60285	0.581	0.09	9.97989e-201	DsRed-3
Pcdh17	1.41622e-40	0.58835	0.792	0.533	3.10988e-36	DsRed-3
Inpp5f	2.69547e-45	0.579056	0.879	0.766	5.91899e-41	DsRed-3
Fgf13	1.07968e-50	0.569028	0.802	0.588	2.37086e-46	DsRed-3
Lingo1	6.48711e-83	0.564556	0.835	0.516	1.4245e-78	DsRed-3
Cdkn1a	1.49533e-70	0.558891	0.535	0.206	3.2836e-66	DsRed-3
Cbln4	4.8757e-48	0.557021	0.355	0.114	1.07066e-43	DsRed-3
Chd3os	7.27653e-70	0.555287	0.931	0.763	1.59785e-65	DsRed-3
Lypd1	5.67039e-65	0.554281	0.45	0.148	1.24516e-60	DsRed-3
Nxph1	6.07447e-113	0.548179	0.653	0.197	1.33389e-108	DsRed-3
Opcml	5.40038e-40	0.542001	0.614	0.355	1.18587e-35	DsRed-3
Cend1	8.32631e-36	0.534766	0.797	0.691	1.82837e-31	DsRed-3
Lingo2	1.19325e-104	0.533389	0.679	0.234	2.62027e-100	DsRed-3
Cxadr	1.61703e-70	0.531627	0.9	0.717	3.55085e-66	DsRed-3
Neurod1	1.11297e-98	0.524656	0.56	0.145	2.44398e-94	DsRed-3
Cd47	6.68059e-31	0.522749	0.846	0.704	1.46699e-26	DsRed-3
Pde3a	3.30065e-287	0.517503	0.54	0.044	7.24789e-283	DsRed-3
Gria3	5.43737e-104	0.514262	0.63	0.205	1.19399e-99	DsRed-3
Cspg5	6.40792e-32	0.511888	0.787	0.635	1.40712e-27	DsRed-3
Hpca	1.26721e-100	0.510818	0.548	0.166	2.78267e-96	DsRed-3
Gm45768	1.62828e-202	0.507228	0.671	0.119	3.57553e-198	DsRed-3
Pkia	1.19606e-66	0.500438	0.92	0.779	2.62644e-62	DsRed-3
Rab3c	2.75617e-66	0.495304	0.918	0.672	6.05228e-62	DsRed-3
Amn	8.24172e-160	0.489193	0.445	0.062	1.8098e-155	DsRed-3
Rasgrp2	9.39978e-40	0.488363	0.573	0.359	2.0641e-35	DsRed-3
Rell2	2.11401e-63	0.487656	0.725	0.432	4.64215e-59	DsRed-3
Neurod2	0	0.487004	0.422	0.006	0	DsRed-3
Meg3	8.46954e-55	0.486781	0.992	0.986	1.85983e-50	DsRed-3
Mpc1	3.79678e-42	0.486483	0.856	0.783	8.33734e-38	DsRed-3
Zfp536	2.78471e-145	0.486005	0.668	0.163	6.11494e-141	DsRed-3
Ntm	2.93823e-24	0.482191	0.753	0.6	6.45207e-20	DsRed-3
Nr2f1	2.34483e-45	0.481046	0.44	0.152	5.14901e-41	DsRed-3
Brinp3	8.73251e-62	0.479624	0.553	0.224	1.91757e-57	DsRed-3
Cisd1	1.50659e-62	0.479403	0.959	0.88	3.30833e-58	DsRed-3
Fam131c	6.02001e-48	0.476186	0.594	0.327	1.32193e-43	DsRed-3
Serpini1	2.42905e-60	0.474316	0.769	0.404	5.33396e-56	DsRed-3
Nsg2	2.28406e-70	0.474145	0.992	0.913	5.01557e-66	DsRed-3
Ube2ql1	5.84091e-54	0.47334	0.679	0.382	1.28261e-49	DsRed-3
Pgm2l1	2.13395e-35	0.471989	0.779	0.615	4.68594e-31	DsRed-3
Mir124-2hg	1.99148e-111	0.471398	0.846	0.265	4.37309e-107	DsRed-3
Wsb2	1.97467e-29	0.468903	0.812	0.721	4.33617e-25	DsRed-3
Bend6	2.04011e-54	0.468519	0.632	0.327	4.47987e-50	DsRed-3
Ntn1	1.14562e-261	0.464589	0.432	0.026	2.51566e-257	DsRed-3
Csrp2	5.03149e-47	0.464542	0.874	0.657	1.10486e-42	DsRed-3
Cdh13	3.32987e-45	0.462846	0.635	0.355	7.31207e-41	DsRed-3
Gpr162	1.53119e-67	0.462073	0.83	0.556	3.36233e-63	DsRed-3
Ndrg4	3.18664e-23	0.459405	0.815	0.72	6.99755e-19	DsRed-3
Elmo1	3.34117e-24	0.459278	0.686	0.494	7.33688e-20	DsRed-3
Pbx1	4.02895e-11	0.45831	0.91	0.895	8.84718e-07	DsRed-3
Igsf8	4.70929e-56	0.456049	0.671	0.35	1.03411e-51	DsRed-3
Tmem35a	1.70642e-83	0.452423	0.9	0.455	3.74713e-79	DsRed-3
Bhlhe22	1.32568e-219	0.451568	0.452	0.04	2.91106e-215	DsRed-3
Atp1a3	1.78604e-29	0.451471	0.848	0.771	3.92197e-25	DsRed-3
Nfia	2.00221e-69	0.450354	0.391	0.098	4.39666e-65	DsRed-3
Plppr4	8.96844e-34	0.443922	0.627	0.378	1.96938e-29	DsRed-3
Th	8.33305e-22	0.443318	0.175	0.056	1.82986e-17	DsRed-3
Calb2	2.15495e-07	0.441954	0.504	0.409	0.00473206	DsRed-3
Necab1	3.97057e-196	0.438829	0.47	0.053	8.71897e-192	DsRed-3
Alcam	3.39574e-39	0.433861	0.738	0.432	7.45671e-35	DsRed-3
Gpm6a	3.0267e-55	0.43294	0.982	0.861	6.64633e-51	DsRed-3
Mab21l1	2.14607e-231	0.432671	0.555	0.058	4.71255e-227	DsRed-3
Ralyl	9.59242e-42	0.432231	0.771	0.547	2.1064e-37	DsRed-3
Olfm1	1.58821e-32	0.431592	0.907	0.759	3.48755e-28	DsRed-3
Foxa2	0	0.429439	0.373	0.006	0	DsRed-3
Nrgn	1.28592e-08	0.429023	0.365	0.252	0.000282375	DsRed-3
Atp9a	7.89144e-38	0.428788	0.82	0.665	1.73288e-33	DsRed-3
March1	5.03605e-38	0.428321	0.627	0.368	1.10587e-33	DsRed-3
Napb	1.06685e-35	0.427943	0.738	0.575	2.3427e-31	DsRed-3
Gabbr2	4.54721e-47	0.427405	0.553	0.284	9.98522e-43	DsRed-3
Shroom2	4.41148e-87	0.425394	0.648	0.255	9.68716e-83	DsRed-3
Erbb4	7.00858e-124	0.424997	0.625	0.164	1.53901e-119	DsRed-3
Tubb2a	3.4121e-36	0.42202	0.997	0.974	7.49264e-32	DsRed-3
Clec2l	6.6707e-26	0.422017	0.604	0.455	1.46482e-21	DsRed-3
Celf4	1.81833e-38	0.421566	0.982	0.929	3.99286e-34	DsRed-3
Basp1	1.01946e-45	0.419677	1	0.997	2.23862e-41	DsRed-3
Adcyap1	4.25639e-44	0.419586	0.365	0.127	9.34661e-40	DsRed-3
Podxl2	5.44909e-60	0.41655	0.992	0.94	1.19657e-55	DsRed-3
Cacna2d1	1.56427e-32	0.415956	0.776	0.625	3.43497e-28	DsRed-3
Iglon5	7.40246e-75	0.415666	0.746	0.361	1.62551e-70	DsRed-3
Tacr3	1.58893e-212	0.412097	0.368	0.024	3.48914e-208	DsRed-3
Ppp1r14c	3.4437e-58	0.411684	0.679	0.352	7.56202e-54	DsRed-3
Nrn1	9.72293e-51	0.410623	0.586	0.225	2.13506e-46	DsRed-3
Zcchc12	3.27266e-16	0.409102	0.895	0.737	7.18644e-12	DsRed-3
Slc6a1	8.61348e-29	0.408781	0.617	0.431	1.89143e-24	DsRed-3
Adra1b	4.65002e-53	0.407205	0.404	0.129	1.0211e-48	DsRed-3
Lmx1b	0	0.405904	0.558	0.034	0	DsRed-3
Plppr1	1.5515e-75	0.400955	0.812	0.37	3.40694e-71	DsRed-3
Bcl11b	5.33139e-64	0.39695	0.512	0.167	1.17072e-59	DsRed-3
Gm2694	8.53918e-27	0.393023	0.681	0.436	1.87512e-22	DsRed-3
Rgma	2.84184e-68	0.392928	0.589	0.211	6.24039e-64	DsRed-3
Nrp2	6.56611e-51	0.390965	0.776	0.446	1.44185e-46	DsRed-3
Klhdc8a	6.68546e-104	0.389037	0.576	0.169	1.46806e-99	DsRed-3
Dock4	6.41069e-74	0.388075	0.707	0.311	1.40772e-69	DsRed-3
Pde1a	6.4221e-91	0.385349	0.486	0.131	1.41023e-86	DsRed-3
Atp2b2	6.86554e-27	0.385069	0.545	0.357	1.5076e-22	DsRed-3
Mapt	4.60729e-59	0.382841	0.995	0.951	1.01171e-54	DsRed-3
Ret	2.41317e-92	0.38191	0.571	0.166	5.29908e-88	DsRed-3
Mab21l2	1.36767e-26	0.381906	0.388	0.17	3.00326e-22	DsRed-3
Atp2c1	6.23967e-40	0.381373	0.812	0.631	1.37017e-35	DsRed-3
Ttc9b	3.40691e-25	0.380026	0.895	0.844	7.48124e-21	DsRed-3
Rac3	3.8123e-34	0.375694	0.964	0.881	8.37144e-30	DsRed-3
Magi1	3.47477e-37	0.375563	0.794	0.544	7.63025e-33	DsRed-3
C1qtnf4	5.33478e-33	0.374252	0.915	0.731	1.17146e-28	DsRed-3
Chgb	2.51623e-15	0.372944	0.889	0.775	5.52539e-11	DsRed-3
Sdc3	1.00302e-31	0.372932	0.823	0.698	2.20254e-27	DsRed-3
Kcnb2	3.89842e-46	0.371247	0.643	0.339	8.56055e-42	DsRed-3
Nrxn2	1.63936e-32	0.367553	0.969	0.904	3.59988e-28	DsRed-3
Plcb1	1.98336e-75	0.366969	0.638	0.255	4.35527e-71	DsRed-3
Tmem163	1.58792e-36	0.36611	0.733	0.438	3.48692e-32	DsRed-3
Pole4	7.32451e-62	0.365308	0.771	0.442	1.60839e-57	DsRed-3
Thra	2.37178e-44	0.364022	0.987	0.95	5.20818e-40	DsRed-3
Adcy1	2.53636e-57	0.363847	0.532	0.21	5.5696e-53	DsRed-3
Sez6	1.54026e-57	0.363144	0.692	0.345	3.38225e-53	DsRed-3
Anks1b	1.20621e-43	0.361609	0.656	0.39	2.64871e-39	DsRed-3
St8sia2	2.87049e-31	0.361513	0.779	0.569	6.30331e-27	DsRed-3
Gabrb1	3.7673e-41	0.361154	0.586	0.307	8.27261e-37	DsRed-3
Slc12a5	1.14508e-17	0.36032	0.566	0.418	2.51449e-13	DsRed-3
Gabra1	1.07233e-63	0.359302	0.499	0.175	2.35472e-59	DsRed-3
Hpcal1	1.07936e-22	0.359189	0.799	0.666	2.37016e-18	DsRed-3
Syndig1l	7.06653e-124	0.358306	0.494	0.1	1.55174e-119	DsRed-3
Scamp1	1.46917e-47	0.357665	0.895	0.739	3.22614e-43	DsRed-3
Csdc2	3.34731e-47	0.357624	0.805	0.538	7.35036e-43	DsRed-3
Aplp2	2.7661e-34	0.356988	0.851	0.732	6.07408e-30	DsRed-3
Fbxo9	1.08427e-36	0.356969	0.743	0.563	2.38096e-32	DsRed-3
Ankrd12	2.00337e-48	0.356454	0.902	0.763	4.3992e-44	DsRed-3
Tmem158	9.97285e-34	0.356419	0.756	0.552	2.18994e-29	DsRed-3
Grin3a	8.39504e-24	0.353625	0.465	0.277	1.84347e-19	DsRed-3
Tshz1	1.18755e-59	0.352284	0.476	0.17	2.60773e-55	DsRed-3
Fam3c	1.32759e-37	0.35175	0.627	0.413	2.91525e-33	DsRed-3
Lamp5	2.96906e-126	0.351037	0.38	0.049	6.51977e-122	DsRed-3
Nsg1	8.80449e-64	0.349767	1	0.98	1.93338e-59	DsRed-3
Elmod1	7.1854e-41	0.348385	0.602	0.351	1.57784e-36	DsRed-3
Tmem191c	2.26857e-30	0.347274	0.594	0.38	4.98156e-26	DsRed-3
Fjx1	3.84116e-50	0.34657	0.55	0.24	8.4348e-46	DsRed-3
Lhfpl2	9.04662e-187	0.344516	0.47	0.054	1.98655e-182	DsRed-3
Car11	4.17509e-44	0.343805	0.609	0.339	9.16808e-40	DsRed-3
Scoc	1.06076e-37	0.343547	0.915	0.828	2.32933e-33	DsRed-3
Nell1	3.34046e-29	0.341454	0.491	0.267	7.33531e-25	DsRed-3
Sulf1	3.72314e-99	0.341357	0.465	0.105	8.17564e-95	DsRed-3
Sh3gl2	5.09735e-37	0.33969	0.676	0.429	1.11933e-32	DsRed-3
Fam19a2	3.18902e-32	0.338608	0.496	0.251	7.00278e-28	DsRed-3
Mien1	2.93821e-36	0.337566	0.941	0.89	6.45201e-32	DsRed-3
Pcdh8	1.71657e-31	0.337167	0.494	0.249	3.76942e-27	DsRed-3
Fam171a2	7.03709e-35	0.332822	0.895	0.8	1.54527e-30	DsRed-3
Ppargc1a	4.84784e-118	0.332377	0.427	0.076	1.06454e-113	DsRed-3
Kifc2	8.30051e-38	0.330903	0.573	0.328	1.82271e-33	DsRed-3
Gap43	1.54537e-41	0.328957	1	0.967	3.39348e-37	DsRed-3
Cd200	2.32602e-35	0.32643	0.956	0.848	5.10771e-31	DsRed-3
Grin2b	7.14445e-34	0.325987	0.668	0.395	1.56885e-29	DsRed-3
Nsf	2.90569e-23	0.325866	0.72	0.549	6.3806e-19	DsRed-3
Nfix	3.42822e-67	0.32573	0.272	0.049	7.52802e-63	DsRed-3
Cnih2	5.53965e-48	0.322965	0.992	0.948	1.21645e-43	DsRed-3
Scn3b	2.74243e-41	0.322762	0.859	0.623	6.02211e-37	DsRed-3
Tuba4a	1.18758e-33	0.322244	0.463	0.226	2.6078e-29	DsRed-3
Atp6v1a	3.027e-26	0.32171	0.82	0.7	6.64699e-22	DsRed-3
Eml4	5.37773e-42	0.32113	0.643	0.355	1.1809e-37	DsRed-3
Rgs10	1.20564e-60	0.31975	0.537	0.206	2.64746e-56	DsRed-3
Pid1	3.98921e-54	0.319666	0.73	0.336	8.75991e-50	DsRed-3
Ablim3	9.24328e-39	0.318957	0.671	0.415	2.02973e-34	DsRed-3
Sorcs3	1.9785e-60	0.317483	0.553	0.211	4.3446e-56	DsRed-3
Tubb2b	1.28507e-32	0.316394	1	0.997	2.82188e-28	DsRed-3
Chst8	3.92858e-46	0.316064	0.65	0.298	8.62677e-42	DsRed-3
Edil3	5.41055e-39	0.316039	0.746	0.416	1.1881e-34	DsRed-3
Thy1	3.50493e-33	0.315537	0.386	0.159	7.69648e-29	DsRed-3
Dmrta2os	0	0.31449	0.422	0.002	0	DsRed-3
Adarb2	5.19714e-71	0.31343	0.344	0.076	1.14124e-66	DsRed-3
Nav1	6.36804e-30	0.31343	0.905	0.811	1.39836e-25	DsRed-3
Ckmt1	1.03844e-32	0.312733	0.622	0.398	2.28031e-28	DsRed-3
Scn1b	6.00619e-38	0.31114	0.47	0.214	1.3189e-33	DsRed-3
Ccdc85a	1.58622e-47	0.311129	0.64	0.333	3.48318e-43	DsRed-3
Srcin1	3.56748e-20	0.307925	0.676	0.569	7.83383e-16	DsRed-3
Adgrb2	4.15956e-44	0.307538	0.602	0.311	9.13399e-40	DsRed-3
Ifngr2	5.90711e-33	0.306566	0.728	0.545	1.29714e-28	DsRed-3
Abr	7.79013e-36	0.306402	0.853	0.658	1.71063e-31	DsRed-3
Lin7a	2.40342e-33	0.305077	0.684	0.427	5.27768e-29	DsRed-3
Rnf182	1.67331e-78	0.304475	0.599	0.193	3.67442e-74	DsRed-3
Enho	1.22822e-17	0.302934	0.776	0.724	2.69705e-13	DsRed-3
Syngr3	1.44172e-22	0.301963	0.779	0.64	3.16588e-18	DsRed-3
Kctd12	1.09415e-19	0.301927	0.36	0.183	2.40264e-15	DsRed-3
2900011O08Rik	2.30016e-31	0.301922	0.897	0.748	5.05092e-27	DsRed-3
Kifap3	1.73367e-34	0.301178	0.9	0.785	3.80697e-30	DsRed-3
Atp6v0e2	1.37882e-24	0.301152	0.897	0.823	3.02776e-20	DsRed-3
Cmpk1	2.53284e-48	0.300878	0.974	0.945	5.56186e-44	DsRed-3
Snx16	5.75283e-34	0.300765	0.771	0.591	1.26326e-29	DsRed-3
Scn2a	2.63132e-19	0.299274	0.676	0.533	5.77812e-15	DsRed-3
Ptprs	2.91592e-41	0.299195	0.967	0.908	6.40307e-37	DsRed-3
Sh3bp5	4.51375e-34	0.299066	0.846	0.635	9.91174e-30	DsRed-3
Nexmif	4.56603e-30	0.298534	0.72	0.488	1.00265e-25	DsRed-3
Iqsec3	5.60886e-48	0.298019	0.627	0.316	1.23165e-43	DsRed-3
Vegfb	1.20381e-28	0.297652	0.632	0.45	2.64344e-24	DsRed-3
Neto2	3.44479e-33	0.29765	0.607	0.345	7.56441e-29	DsRed-3
Ypel3	6.86978e-34	0.297034	0.961	0.9	1.50853e-29	DsRed-3
Tmem151a	3.11811e-26	0.295809	0.542	0.327	6.84706e-22	DsRed-3
Gabrg2	9.9983e-35	0.294901	0.735	0.504	2.19553e-30	DsRed-3
Eno2	1.85821e-40	0.294634	0.609	0.319	4.08044e-36	DsRed-3
Apba1	2.12254e-27	0.294514	0.586	0.4	4.66088e-23	DsRed-3
Snap91	6.99437e-29	0.294351	0.81	0.666	1.53589e-24	DsRed-3
Ncald	3.68233e-13	0.293792	0.717	0.61	8.08602e-09	DsRed-3
Syt13	1.33654e-22	0.293448	0.72	0.566	2.93492e-18	DsRed-3
Ncdn	1.60569e-32	0.292869	0.712	0.466	3.52593e-28	DsRed-3
Pgap1	1.05952e-25	0.292407	0.679	0.479	2.32659e-21	DsRed-3
Dnm1	2.65476e-19	0.292051	0.699	0.562	5.82958e-15	DsRed-3
Pacsin1	5.36058e-33	0.291956	0.612	0.351	1.17713e-28	DsRed-3
Ddah1	1.23828e-18	0.291576	0.625	0.484	2.71915e-14	DsRed-3
Fam103a1	1.48209e-31	0.291373	0.92	0.871	3.25453e-27	DsRed-3
Pdgfa	4.61274e-23	0.290288	0.555	0.346	1.01291e-18	DsRed-3
Cox5a	1.54891e-24	0.290255	0.987	0.975	3.40125e-20	DsRed-3
Tmem91	1.81737e-24	0.290101	0.496	0.29	3.99076e-20	DsRed-3
Arl6ip1	3.03096e-32	0.288839	0.979	0.917	6.65569e-28	DsRed-3
Isoc1	8.64407e-37	0.288811	0.542	0.295	1.89815e-32	DsRed-3
AC149090.1	2.50528e-28	0.28801	0.817	0.646	5.50135e-24	DsRed-3
Fabp3	2.98168e-14	0.287555	0.789	0.728	6.54748e-10	DsRed-3
Caln1	6.93067e-39	0.287186	0.522	0.254	1.52191e-34	DsRed-3
Flrt3	2.32219e-62	0.286951	0.535	0.19	5.0993e-58	DsRed-3
Prdx5	8.59476e-28	0.28639	0.941	0.911	1.88732e-23	DsRed-3
Lrfn5	5.0267e-26	0.28605	0.632	0.418	1.10381e-21	DsRed-3
Arhgdig	2.25824e-09	0.285693	0.694	0.636	4.95887e-05	DsRed-3
Crhbp	3.5993e-66	0.283649	0.211	0.031	7.90371e-62	DsRed-3
Lima1	6.31764e-109	0.283156	0.424	0.076	1.38729e-104	DsRed-3
En1	5.0536e-20	0.282942	0.162	0.05	1.10972e-15	DsRed-3
Syp	3.38025e-19	0.282809	0.877	0.743	7.42269e-15	DsRed-3
Clmp	8.69058e-31	0.281931	0.817	0.568	1.90836e-26	DsRed-3
Slc24a3	4.27954e-28	0.28147	0.535	0.295	9.39744e-24	DsRed-3
Atat1	7.34467e-22	0.281303	0.972	0.844	1.61282e-17	DsRed-3
Bdnf	2.52304e-72	0.281004	0.424	0.112	5.54034e-68	DsRed-3
Dtnbp1	3.99734e-28	0.281	0.784	0.621	8.77777e-24	DsRed-3
Klhl23	1.12232e-36	0.280491	0.699	0.449	2.46451e-32	DsRed-3
Zfp428	2.87851e-35	0.280154	0.974	0.932	6.32092e-31	DsRed-3
Mgst3	1.54956e-22	0.279427	0.887	0.812	3.40267e-18	DsRed-3
Syt16	4.06215e-34	0.278396	0.792	0.533	8.92006e-30	DsRed-3
Snrpn	1.59118e-29	0.277921	0.997	0.983	3.49408e-25	DsRed-3
Rtn1	7.11097e-46	0.277269	1	0.995	1.5615e-41	DsRed-3
Fam110b	1.28322e-25	0.277131	0.776	0.582	2.81782e-21	DsRed-3
Nap1l3	4.71531e-31	0.276402	0.684	0.476	1.03543e-26	DsRed-3
Sorcs2	5.64756e-127	0.275551	0.481	0.089	1.24015e-122	DsRed-3
Mal2	2.41107e-45	0.274502	0.512	0.227	5.29447e-41	DsRed-3
Npnt	1.28502e-33	0.273166	0.278	0.092	2.82177e-29	DsRed-3
Spock2	1.01499e-19	0.272134	0.71	0.572	2.22883e-15	DsRed-3
Hs3st4	2.81002e-50	0.272081	0.411	0.135	6.17053e-46	DsRed-3
Kctd8	3.95395e-14	0.271815	0.419	0.271	8.68249e-10	DsRed-3
Psd	6.93239e-20	0.270635	0.81	0.669	1.52228e-15	DsRed-3
Unc13c	1.95479e-99	0.270598	0.28	0.037	4.29252e-95	DsRed-3
Pdha1	2.02786e-27	0.270041	0.766	0.617	4.45297e-23	DsRed-3
Phf24	1.13398e-41	0.269493	0.604	0.331	2.4901e-37	DsRed-3
Stau2	5.71794e-26	0.26904	0.761	0.625	1.2556e-21	DsRed-3
Rnf152	1.13731e-24	0.268937	0.496	0.29	2.49742e-20	DsRed-3
Prdm8	1.1843e-161	0.268513	0.26	0.014	2.6006e-157	DsRed-3
Flrt2	1.02528e-63	0.268209	0.512	0.162	2.25142e-59	DsRed-3
Adgrl1	1.74047e-25	0.267496	0.856	0.759	3.82189e-21	DsRed-3
Gnal	6.77378e-34	0.267313	0.609	0.366	1.48745e-29	DsRed-3
Lrrc4b	3.35141e-21	0.267131	0.753	0.602	7.35935e-17	DsRed-3
Fndc4	3.43874e-36	0.265979	0.733	0.486	7.55112e-32	DsRed-3
Reep1	9.35479e-31	0.265969	0.951	0.839	2.05422e-26	DsRed-3
Raph1	7.28238e-25	0.265951	0.748	0.638	1.59914e-20	DsRed-3
Zcchc18	7.02673e-15	0.265701	0.861	0.795	1.543e-10	DsRed-3
Cdo1	6.99361e-47	0.26524	0.781	0.472	1.53573e-42	DsRed-3
Ctnnd2	3.70759e-14	0.264991	0.717	0.606	8.14149e-10	DsRed-3
G3bp2	6.05713e-29	0.264588	0.951	0.877	1.33009e-24	DsRed-3
Disp2	9.17841e-21	0.264427	0.648	0.476	2.01549e-16	DsRed-3
Sv2a	3.33933e-19	0.264243	0.82	0.699	7.33283e-15	DsRed-3
Scamp5	1.0178e-27	0.26371	0.658	0.46	2.23499e-23	DsRed-3
Cit	6.37753e-26	0.263574	0.548	0.33	1.40044e-21	DsRed-3
Ptp4a3	4.39664e-30	0.26306	0.717	0.502	9.65459e-26	DsRed-3
Tenm2	1.12241e-14	0.262628	0.614	0.492	2.4647e-10	DsRed-3
C230004F18Rik	8.19566e-30	0.262128	0.596	0.355	1.79969e-25	DsRed-3
Fam168a	4.16622e-23	0.261881	0.717	0.542	9.1486e-19	DsRed-3
Rasgef1b	5.08847e-59	0.261663	0.571	0.217	1.11738e-54	DsRed-3
B230334C09Rik	6.6878e-34	0.261316	0.576	0.312	1.46858e-29	DsRed-3
Ppp3cb	6.1541e-25	0.259184	0.851	0.772	1.35138e-20	DsRed-3
Atp6ap2	3.07467e-21	0.259039	0.835	0.732	6.75168e-17	DsRed-3
Snx11	2.16492e-27	0.258847	0.56	0.316	4.75394e-23	DsRed-3
Dclk1	3.36234e-23	0.258817	0.959	0.917	7.38336e-19	DsRed-3
Atp1b1	2.47807e-09	0.258723	0.871	0.821	5.4416e-05	DsRed-3
Hbegf	1.33257e-65	0.257908	0.566	0.202	2.92619e-61	DsRed-3
Dpp10	7.86622e-42	0.257542	0.512	0.231	1.72734e-37	DsRed-3
Fnbp1l	1.59014e-32	0.2575	0.956	0.895	3.49179e-28	DsRed-3
Clstn1	2.44193e-22	0.256809	0.861	0.755	5.36223e-18	DsRed-3
Scn3a	2.64114e-26	0.256272	0.823	0.667	5.79967e-22	DsRed-3
Ccnd2	1.12191e-45	0.255938	0.219	0.046	2.46361e-41	DsRed-3
Macrod2	5.61277e-26	0.255802	0.817	0.614	1.23251e-21	DsRed-3
Nptn	1.2966e-22	0.254799	0.871	0.752	2.84719e-18	DsRed-3
Pdxp	3.04357e-18	0.254308	0.871	0.811	6.68337e-14	DsRed-3
Vdac1	2.45746e-32	0.253606	0.972	0.949	5.39634e-28	DsRed-3
Pclo	6.05766e-20	0.252888	0.686	0.514	1.3302e-15	DsRed-3
Plcb4	5.67675e-35	0.252253	0.604	0.343	1.24656e-30	DsRed-3
Sv2b	8.60451e-116	0.252242	0.404	0.067	1.88947e-111	DsRed-3
Sobp	1.73439e-19	0.252234	0.833	0.71	3.80854e-15	DsRed-3
Id2	3.04282e-06	0.251962	0.46	0.355	0.0668173	DsRed-3
Rasgrp1	7.49504e-37	0.251099	0.298	0.097	1.64584e-32	DsRed-3
Adamts2	2.88059e-243	0.251044	0.357	0.016	6.32549e-239	DsRed-3
Smim10l2a	6.38126e-42	0.250837	0.54	0.26	1.40126e-37	DsRed-3
Nbea	4.04883e-24	0.250301	0.82	0.66	8.89082e-20	DsRed-3
Samd5	1.34872e-41	0.250124	0.488	0.203	2.96165e-37	DsRed-3
1700020I14Rik	2.53747e-17	0.249992	0.563	0.389	5.57203e-13	DsRed-3
Tsc22d1	2.91349e-20	0.249978	1	0.973	6.39774e-16	DsRed-3
Atp1b2	1.18689e-25	0.249455	0.53	0.314	2.6063e-21	DsRed-3
Grin2d	4.42083e-37	0.249386	0.47	0.219	9.70771e-33	DsRed-3
Gsg1l	1.62489e-69	0.249136	0.306	0.063	3.5681e-65	DsRed-3
Fry	6.79098e-21	0.248938	0.725	0.568	1.49123e-16	DsRed-3
Fam102b	7.31306e-26	0.248864	0.594	0.378	1.60588e-21	DsRed-3
Nanos1	1.39285e-22	0.248572	0.609	0.388	3.05856e-18	DsRed-3
Aplp1	3.71416e-28	0.248128	0.997	0.968	8.15593e-24	DsRed-3
Atp5g3	5.08048e-20	0.248055	0.987	0.979	1.11562e-15	DsRed-3
Rbfox1	8.03029e-28	0.248055	0.658	0.404	1.76337e-23	DsRed-3
Ppm1e	3.75399e-29	0.247475	0.594	0.363	8.2434e-25	DsRed-3
Cacna2d3	3.56343e-18	0.247266	0.388	0.213	7.82493e-14	DsRed-3
Spint2	1.07171e-24	0.246648	0.766	0.557	2.35336e-20	DsRed-3
Syt7	6.57257e-25	0.246556	0.599	0.378	1.44327e-20	DsRed-3
Asic2	5.36219e-23	0.24646	0.591	0.359	1.17748e-18	DsRed-3
Cystm1	2.79197e-22	0.246339	0.751	0.605	6.13088e-18	DsRed-3
Cacng3	7.38842e-113	0.245984	0.38	0.062	1.62242e-108	DsRed-3
Dnajc6	7.26093e-21	0.245639	0.632	0.455	1.59443e-16	DsRed-3

## Sheet: DsRed-4
Figure 1-source data 4 (corresponding to Figure1-figure supplement 3). Feature genes that define each of the 9 DsRed
clusters integrated across all six developmental stages.
The data are sorted from highest to lowest for each integrated custer by average log fold-change > 0.25 (avg_logFC)
of gene expression in the featured cluster relative to all other clusters.
pct.1, Percentage of cells in the indicated cluster with significant differential gene expression
pct.2, Percentage of cells in all other clusters with significant differential gene expression
p-val, p-value
p_val_adj, adjusted p-value for multiple comparisons
The Wilcoxon test was performed to identify the differentially expressed genes in each cluster
Gene	p_val	avg_logFC	pct.1	pct.2	p_val_adj	cluster
Otp	0	2.54625	0.966	0.059	0	DsRed-4
Sst	1.25708e-45	2.45836	0.321	0.099	2.76041e-41	DsRed-4
Npy	1.22337e-57	2.01188	0.347	0.095	2.6864e-53	DsRed-4
Dlk1	1.15332e-187	1.99185	0.986	0.557	2.53257e-183	DsRed-4
Cited1	1.13749e-75	1.47651	0.748	0.432	2.49782e-71	DsRed-4
Agrp	3.68329e-74	1.41819	0.252	0.038	8.08813e-70	DsRed-4
Peg10	5.97634e-109	0.978305	0.926	0.597	1.31234e-104	DsRed-4
Calcr	8.56646e-138	0.952354	0.55	0.111	1.88111e-133	DsRed-4
Magel2	7.20059e-81	0.890149	0.877	0.609	1.58118e-76	DsRed-4
Isl1	2.34774e-76	0.885736	0.977	0.612	5.1554e-72	DsRed-4
Six6	6.16831e-75	0.821174	0.868	0.484	1.3545e-70	DsRed-4
Tbca	5.12428e-147	0.810529	0.997	0.983	1.12524e-142	DsRed-4
Efna5	1.59629e-69	0.746045	0.923	0.716	3.5053e-65	DsRed-4
Bsx	7.49492e-203	0.713804	0.533	0.062	1.64581e-198	DsRed-4
Ntm	1.66722e-48	0.685702	0.822	0.596	3.66105e-44	DsRed-4
Ap3b1	9.06079e-70	0.626569	0.607	0.285	1.98966e-65	DsRed-4
Ssbp2	6.42924e-67	0.619667	0.92	0.773	1.4118e-62	DsRed-4
Klhdc8b	3.87282e-56	0.609412	0.92	0.822	8.50432e-52	DsRed-4
Cpa4	2.88042e-101	0.594494	0.393	0.072	6.32512e-97	DsRed-4
Tceal9	1.16891e-84	0.590316	0.989	0.975	2.56682e-80	DsRed-4
Tshz2	1.96611e-43	0.584487	0.679	0.436	4.31739e-39	DsRed-4
Mest	1.1134e-22	0.564243	0.63	0.524	2.44492e-18	DsRed-4
Tox2	6.11021e-56	0.563855	0.854	0.621	1.34174e-51	DsRed-4
2900055J20Rik	5.51593e-42	0.556157	0.553	0.3	1.21124e-37	DsRed-4
Mfap2	6.47722e-38	0.547676	0.736	0.566	1.42233e-33	DsRed-4
Slc32a1	3.73191e-132	0.528778	0.51	0.086	8.1949e-128	DsRed-4
Hnrnpk	3.92195e-50	0.52445	1	0.996	8.61222e-46	DsRed-4
Rps14	1.23789e-71	0.5124	1	0.998	2.71828e-67	DsRed-4
Sox21	7.8821e-58	0.492553	0.45	0.15	1.73083e-53	DsRed-4
H2afv	8.40218e-37	0.492259	0.894	0.883	1.84503e-32	DsRed-4
Phip	1.70125e-39	0.490243	0.908	0.846	3.73578e-35	DsRed-4
Hmgn1	1.6321e-61	0.481982	0.997	0.992	3.58393e-57	DsRed-4
Rps27	6.78097e-72	0.480462	1	0.998	1.48903e-67	DsRed-4
H3f3b	9.2048e-61	0.479888	1	1	2.02128e-56	DsRed-4
Ndn	1.2846e-06	0.468872	0.788	0.829	0.0282085	DsRed-4
Cbln4	6.16689e-26	0.466622	0.298	0.12	1.35419e-21	DsRed-4
Snrpg	6.8902e-50	0.452488	0.983	0.971	1.51302e-45	DsRed-4
Foxp1	8.92762e-10	0.4445	0.559	0.541	1.96042e-05	DsRed-4
Malat1	1.0408e-44	0.4439	1	0.999	2.28549e-40	DsRed-4
Hmgn2	1.58364e-43	0.44119	0.957	0.916	3.47751e-39	DsRed-4
Rpl13a	1.77498e-33	0.432839	0.96	0.917	3.89767e-29	DsRed-4
Cdk4	6.87989e-22	0.429609	0.94	0.933	1.51075e-17	DsRed-4
Tmem176b	1.79478e-31	0.419322	0.848	0.735	3.94115e-27	DsRed-4
Zdbf2	8.68135e-36	0.419016	0.88	0.713	1.90634e-31	DsRed-4
Rbm4b	6.21728e-30	0.417953	0.914	0.895	1.36525e-25	DsRed-4
Gm13889	3.87219e-19	0.415724	0.372	0.207	8.50294e-15	DsRed-4
Hap1	9.08381e-32	0.414877	0.96	0.767	1.99471e-27	DsRed-4
Jun	3.04754e-17	0.413704	0.685	0.573	6.6921e-13	DsRed-4
Celf3	1.74871e-36	0.413569	0.923	0.875	3.83999e-32	DsRed-4
Mad2l2	5.93778e-27	0.413146	0.722	0.612	1.30388e-22	DsRed-4
Mdk	3.13075e-27	0.411469	0.378	0.172	6.87481e-23	DsRed-4
Tub	1.49633e-36	0.403851	0.828	0.727	3.28579e-32	DsRed-4
Fam183b	1.71878e-24	0.392851	0.633	0.451	3.77428e-20	DsRed-4
Maged1	7.17924e-34	0.39256	0.991	0.977	1.57649e-29	DsRed-4
Pnrc1	7.59665e-13	0.392474	0.67	0.682	1.66815e-08	DsRed-4
Rps6ka6	6.87281e-14	0.387003	0.421	0.313	1.5092e-09	DsRed-4
Jam3	9.91477e-25	0.385269	0.656	0.544	2.17718e-20	DsRed-4
Zbtb20	1.36445e-19	0.384301	0.86	0.804	2.9962e-15	DsRed-4
Rps28	3.1492e-48	0.380688	1	0.998	6.91533e-44	DsRed-4
Igfbp2	1.75334e-26	0.380033	0.619	0.414	3.85015e-22	DsRed-4
Meg3	1.51452e-36	0.377987	0.997	0.986	3.32573e-32	DsRed-4
Syt1	7.01643e-27	0.373926	0.819	0.665	1.54074e-22	DsRed-4
Tmem108	2.99648e-18	0.372955	0.573	0.455	6.57998e-14	DsRed-4
Hmgn3	1.48437e-27	0.371328	0.84	0.663	3.25952e-23	DsRed-4
Kdm6b	1.67012e-06	0.36555	0.605	0.643	0.0366741	DsRed-4
Hist3h2ba	1.0183e-22	0.362217	0.966	0.934	2.23609e-18	DsRed-4
Rpl27	4.54712e-43	0.362213	0.997	0.993	9.98503e-39	DsRed-4
Tpt1	1.61653e-52	0.359028	1	0.999	3.54974e-48	DsRed-4
Rbm39	1.5129e-35	0.35834	0.989	0.986	3.32218e-31	DsRed-4
Atp6v0e	2.88522e-16	0.358181	0.582	0.476	6.33565e-12	DsRed-4
Tra2b	9.66762e-27	0.351707	0.908	0.911	2.12291e-22	DsRed-4
Slc25a5	5.44501e-17	0.350809	0.948	0.937	1.19567e-12	DsRed-4
Ccdc12	1.79794e-31	0.347036	0.86	0.778	3.9481e-27	DsRed-4
Rsrp1	1.59833e-34	0.34626	0.98	0.98	3.50978e-30	DsRed-4
Ppdpf	7.35729e-34	0.342132	0.966	0.951	1.61559e-29	DsRed-4
Peg3	4.48551e-31	0.339653	0.986	0.855	9.84974e-27	DsRed-4
Rps15	8.22086e-32	0.339389	1	0.994	1.80522e-27	DsRed-4
Sh3kbp1	1.37774e-20	0.334902	0.67	0.58	3.02538e-16	DsRed-4
Rpl35a	5.77239e-60	0.334276	1	0.999	1.26756e-55	DsRed-4
Cyth1	4.87856e-18	0.332226	0.536	0.434	1.07128e-13	DsRed-4
Tcf4	8.69679e-11	0.331623	0.602	0.536	1.90973e-06	DsRed-4
Rrad	1.24404e-16	0.323864	0.479	0.308	2.73179e-12	DsRed-4
Tcf3	1.62903e-13	0.323612	0.562	0.487	3.57719e-09	DsRed-4
Sox4	2.21805e-09	0.313962	0.917	0.924	4.87061e-05	DsRed-4
Snrpf	4.28124e-35	0.312904	0.96	0.957	9.40118e-31	DsRed-4
Btg1	2.49202e-12	0.310809	0.745	0.77	5.47223e-08	DsRed-4
Nol4	4.72256e-14	0.310577	0.49	0.373	1.03703e-09	DsRed-4
Arid5b	5.23816e-14	0.310508	0.372	0.248	1.15025e-09	DsRed-4
Rps27rt	1.0923e-15	0.30894	0.662	0.591	2.39858e-11	DsRed-4
Trp53	2.42237e-13	0.304829	0.57	0.5	5.31928e-09	DsRed-4
Tox	2.49335e-15	0.302725	0.587	0.468	5.47514e-11	DsRed-4
Vezf1	1.30759e-14	0.30244	0.679	0.66	2.87135e-10	DsRed-4
Ube2b	1.73133e-37	0.301948	0.968	0.969	3.80183e-33	DsRed-4
Xist	6.95193e-05	0.301656	0.59	0.631	1	DsRed-4
Dusp1	1.30694e-07	0.299644	0.556	0.562	0.00286992	DsRed-4
Gm11808	6.21945e-12	0.298578	0.713	0.709	1.36573e-07	DsRed-4
Klhdc10	2.2641e-17	0.298294	0.642	0.558	4.97174e-13	DsRed-4
Dbpht2	1.73736e-12	0.297101	0.519	0.382	3.81507e-08	DsRed-4
Dusp8	3.94082e-06	0.296703	0.619	0.663	0.0865364	DsRed-4
Prox1	2.24643e-17	0.296226	0.516	0.368	4.93293e-13	DsRed-4
Grcc10	3.07494e-17	0.295785	0.797	0.797	6.75227e-13	DsRed-4
Rpl31	1.18797e-26	0.293301	0.997	0.995	2.60866e-22	DsRed-4
Tcf12	1.57085e-05	0.292467	0.53	0.521	0.344942	DsRed-4
Cntfr	1.60629e-07	0.292164	0.57	0.565	0.00352725	DsRed-4
Mageh1	1.45545e-15	0.291609	0.831	0.857	3.19602e-11	DsRed-4
Gck	6.45909e-19	0.291423	0.536	0.39	1.41835e-14	DsRed-4
Rpl37a	2.30085e-42	0.290924	1	0.999	5.05244e-38	DsRed-4
Pdlim7	1.63853e-11	0.287193	0.736	0.74	3.59805e-07	DsRed-4
Sox11	7.07842e-15	0.285815	0.989	0.898	1.55435e-10	DsRed-4
Actl6a	3.87041e-15	0.285632	0.605	0.523	8.49903e-11	DsRed-4
Insm1	5.97665e-09	0.28542	0.395	0.294	0.000131241	DsRed-4
Gpr179	3.54007e-27	0.285124	0.292	0.114	7.77365e-23	DsRed-4
1500035N22Rik	7.09565e-15	0.284394	0.367	0.23	1.55813e-10	DsRed-4
Srsf6	8.346e-17	0.283136	0.897	0.917	1.8327e-12	DsRed-4
Rpl23a	5.02305e-17	0.280527	1	0.99	1.10301e-12	DsRed-4
St8sia4	2.31895e-12	0.278745	0.407	0.292	5.09219e-08	DsRed-4
Asb4	2.89018e-14	0.273681	0.613	0.426	6.34654e-10	DsRed-4
Peli1	2.20094e-12	0.272837	0.728	0.732	4.83304e-08	DsRed-4
Rbbp4	4.3563e-14	0.272354	0.751	0.774	9.56599e-10	DsRed-4
Erh	5.39951e-18	0.269066	0.937	0.952	1.18568e-13	DsRed-4
Cdk2ap1	1.4345e-10	0.26717	0.659	0.661	3.15001e-06	DsRed-4
Efnb3	6.07889e-15	0.266157	0.845	0.798	1.33486e-10	DsRed-4
Hnrnpc	3.29903e-20	0.266149	0.934	0.947	7.24434e-16	DsRed-4
Ftl1	8.27288e-23	0.263573	1	0.999	1.81664e-18	DsRed-4
Lsm8	3.09219e-14	0.261205	0.736	0.733	6.79015e-10	DsRed-4
Cirbp	8.15153e-25	0.261055	0.994	0.985	1.78999e-20	DsRed-4
Irf2bpl	8.60644e-09	0.260602	0.728	0.765	0.000188989	DsRed-4
H1f0	3.081e-05	0.257985	0.688	0.706	0.676556	DsRed-4
Eif3f	5.77919e-24	0.257272	1	0.991	1.26905e-19	DsRed-4
Camk2n1	2.8931e-12	0.256441	0.811	0.767	6.35295e-08	DsRed-4
Rpl18a	3.5885e-27	0.256267	1	0.999	7.87999e-23	DsRed-4
Phf21a	9.08355e-09	0.255523	0.487	0.438	0.000199466	DsRed-4
Efs	7.86225e-10	0.254491	0.304	0.203	1.72647e-05	DsRed-4
Kcne1l	2.70847e-13	0.253076	0.33	0.201	5.94753e-09	DsRed-4
Ecel1	1.40793e-09	0.252028	0.384	0.273	3.09167e-05	DsRed-4
Tead2	8.38611e-12	0.251958	0.172	0.075	1.84151e-07	DsRed-4
Marcksl1	3.48108e-29	0.251667	0.997	0.996	7.64411e-25	DsRed-4
Btg2	2.92161e-07	0.25122	0.318	0.233	0.00641555	DsRed-4
Lrch2	1.15522e-08	0.250885	0.542	0.519	0.000253675	DsRed-4
Ptov1	1.18419e-24	0.250699	0.997	0.995	2.60035e-20	DsRed-4
Rps25	1.36524e-25	0.249761	1	0.995	2.99793e-21	DsRed-4
Limd2	1.27583e-12	0.248464	0.791	0.776	2.80159e-08	DsRed-4
Bex2	2.7475e-22	0.247143	1	0.989	6.03324e-18	DsRed-4
Sub1	1.26934e-29	0.247008	1	0.995	2.78735e-25	DsRed-4
Srsf5	3.79622e-17	0.246758	0.94	0.95	8.33612e-13	DsRed-4
Anapc13	1.74741e-13	0.246144	0.831	0.835	3.83713e-09	DsRed-4
Chmp4b	5.09241e-13	0.245645	0.808	0.839	1.11824e-08	DsRed-4

## Sheet: DsRed-5
Figure 1-source data 4 (corresponding to Figure1-figure supplement 3). Feature genes that define each of the 9 DsRed
clusters integrated across all six developmental stages.
The data are sorted from highest to lowest for each integrated custer by average log fold-change > 0.25 (avg_logFC)
of gene expression in the featured cluster relative to all other clusters.
pct.1, Percentage of cells in the indicated cluster with significant differential gene expression
pct.2, Percentage of cells in all other clusters with significant differential gene expression
p-val, p-value
p_val_adj, adjusted p-value for multiple comparisons
The Wilcoxon test was performed to identify the differentially expressed genes in each cluster
Gene	p_val	avg_logFC	pct.1	pct.2	p_val_adj	cluster
Tac2	2.32733e-263	2.02329	0.616	0.108	5.11059e-259	DsRed-5
Ap1s2	2.61037e-118	1.18679	0.907	0.796	5.73211e-114	DsRed-5
Gm27199	0	1.1315	0.811	0.121	0	DsRed-5
Pgrmc1	4.78377e-220	1.1192	0.998	0.991	1.05047e-215	DsRed-5
Rprm	1.57809e-23	1.00013	0.646	0.61	3.46533e-19	DsRed-5
Kcnk2	2.29082e-114	0.946533	0.785	0.535	5.03042e-110	DsRed-5
Mrps11	5.84059e-137	0.943945	0.867	0.708	1.28253e-132	DsRed-5
Sox14	7.06952e-212	0.931656	0.836	0.25	1.5524e-207	DsRed-5
Nhlh2	2.0733e-111	0.906486	0.943	0.746	4.55275e-107	DsRed-5
Lhx5	1.43533e-285	0.904307	0.712	0.131	3.15185e-281	DsRed-5
Scg2	1.71351e-28	0.863556	0.671	0.534	3.76269e-24	DsRed-5
Pik3r1	1.64616e-74	0.807699	0.786	0.62	3.61481e-70	DsRed-5
B630019K06Rik	2.61942e-98	0.797494	0.9	0.771	5.75198e-94	DsRed-5
Etnk2	2.11709e-87	0.673252	0.546	0.257	4.64892e-83	DsRed-5
Btg1	4.53423e-66	0.658622	0.847	0.76	9.95672e-62	DsRed-5
Zbtb20	1.4198e-76	0.632457	0.907	0.796	3.11773e-72	DsRed-5
Nr5a2	4.44011e-123	0.629041	0.477	0.132	9.75004e-119	DsRed-5
Adgrl3	9.98659e-91	0.628962	0.831	0.628	2.19296e-86	DsRed-5
Gadd45g	2.93182e-33	0.627173	0.528	0.382	6.43799e-29	DsRed-5
App	2.08096e-86	0.625084	0.957	0.906	4.56957e-82	DsRed-5
Xist	2.67149e-18	0.620572	0.628	0.629	5.86632e-14	DsRed-5
Cited2	9.95135e-60	0.604471	0.836	0.696	2.18522e-55	DsRed-5
Sox2	4.72194e-57	0.593864	0.706	0.476	1.03689e-52	DsRed-5
Esr1	5.32096e-114	0.589599	0.448	0.124	1.16843e-109	DsRed-5
Zfhx3	7.39755e-82	0.578058	0.916	0.757	1.62443e-77	DsRed-5
Mrap2	3.37958e-85	0.561005	0.486	0.195	7.42122e-81	DsRed-5
Gria1	9.43731e-68	0.552083	0.678	0.418	2.07234e-63	DsRed-5
Ar	3.63224e-58	0.546486	0.491	0.247	7.97604e-54	DsRed-5
Tbx3	1.14316e-62	0.540464	0.77	0.453	2.51026e-58	DsRed-5
Tmem35a	1.33954e-54	0.539168	0.699	0.462	2.9415e-50	DsRed-5
Zdbf2	2.60196e-70	0.535756	0.893	0.705	5.71364e-66	DsRed-5
Malat1	8.46808e-80	0.535587	1	0.999	1.85951e-75	DsRed-5
Fos	2.00811e-40	0.528186	0.689	0.464	4.40962e-36	DsRed-5
Trpc5	8.73954e-89	0.52396	0.415	0.132	1.91912e-84	DsRed-5
Hs3st4	1.43408e-81	0.507378	0.402	0.127	3.1491e-77	DsRed-5
Chgb	2.94108e-70	0.501377	0.863	0.774	6.45831e-66	DsRed-5
Pou2f2	6.40383e-44	0.487609	0.891	0.795	1.40622e-39	DsRed-5
Kcnc1	5.99639e-44	0.482098	0.68	0.569	1.31675e-39	DsRed-5
Nkx2-1	1.08506e-58	0.480908	0.888	0.624	2.38269e-54	DsRed-5
Pcdh19	2.38167e-14	0.46716	0.509	0.432	5.2299e-10	DsRed-5
Efnb1	1.75729e-25	0.457161	0.544	0.456	3.85883e-21	DsRed-5
Pcsk1n	2.51571e-63	0.454516	0.996	0.981	5.52424e-59	DsRed-5
Jun	1.19517e-22	0.452455	0.658	0.572	2.62447e-18	DsRed-5
Gkap1	8.02262e-42	0.450543	0.724	0.661	1.76169e-37	DsRed-5
Rps27	4.77612e-51	0.449938	0.993	0.999	1.04879e-46	DsRed-5
Gria2	3.01847e-34	0.435101	0.888	0.76	6.62826e-30	DsRed-5
Vwc2	2.26243e-33	0.430765	0.404	0.233	4.96807e-29	DsRed-5
Unc5d	1.11372e-32	0.422551	0.569	0.395	2.44562e-28	DsRed-5
Rnf138rt1	6.39112e-23	0.421763	0.418	0.281	1.40343e-18	DsRed-5
Tmx4	4.48186e-46	0.421134	0.856	0.763	9.84172e-42	DsRed-5
Nav2	5.17367e-24	0.412684	0.616	0.556	1.13609e-19	DsRed-5
Snrpg	2.85129e-40	0.412257	0.938	0.976	6.26115e-36	DsRed-5
Nrp2	2.65929e-34	0.41171	0.612	0.453	5.83953e-30	DsRed-5
Kcnd2	2.73155e-24	0.411392	0.505	0.394	5.99822e-20	DsRed-5
Negr1	2.58505e-29	0.40386	0.731	0.63	5.6765e-25	DsRed-5
Pcdh11x	3.58068e-08	0.401276	0.324	0.267	0.000786281	DsRed-5
Tub	1.36574e-42	0.400501	0.794	0.726	2.99904e-38	DsRed-5
Map2	1.47074e-59	0.398465	0.941	0.925	3.22959e-55	DsRed-5
AC149090.1	3.38786e-11	0.39629	0.635	0.66	7.43941e-07	DsRed-5
Tbx3os1	3.50026e-27	0.396165	0.416	0.252	7.68622e-23	DsRed-5
Snhg11	0.00483237	0.394031	0.801	0.83	1	DsRed-5
Hmgn2	2.04688e-43	0.393754	0.922	0.918	4.49475e-39	DsRed-5
Miat	1.52664e-30	0.393367	0.687	0.647	3.35235e-26	DsRed-5
Ldb2	5.29389e-22	0.388422	0.441	0.332	1.16248e-17	DsRed-5
Pnisr	1.04611e-36	0.38831	0.847	0.867	2.29715e-32	DsRed-5
Srgap3	3.4866e-33	0.387166	0.673	0.639	7.65622e-29	DsRed-5
Gm11808	9.34961e-13	0.384473	0.669	0.714	2.05308e-08	DsRed-5
Ntrk3	1.96018e-24	0.380318	0.509	0.388	4.30436e-20	DsRed-5
Sphkap	3.11157e-37	0.379138	0.322	0.148	6.8327e-33	DsRed-5
H3f3b	3.33524e-68	0.374618	0.998	1	7.32385e-64	DsRed-5
Grcc10	6.87533e-25	0.373304	0.774	0.8	1.50975e-20	DsRed-5
Chl1	1.00801e-28	0.370163	0.63	0.451	2.21349e-24	DsRed-5
Igsf9b	1.07131e-23	0.36649	0.52	0.418	2.3525e-19	DsRed-5
Tia1	4.8661e-37	0.366164	0.888	0.909	1.06855e-32	DsRed-5
Fam155a	3.18766e-24	0.366074	0.632	0.581	6.99978e-20	DsRed-5
Pcdh10	1.12484e-14	0.365502	0.537	0.489	2.47003e-10	DsRed-5
Zfp462	3.47135e-19	0.364059	0.616	0.579	7.62273e-15	DsRed-5
Brinp2	6.04725e-27	0.361925	0.445	0.304	1.32792e-22	DsRed-5
Rap2c	8.49606e-20	0.359567	0.429	0.318	1.86565e-15	DsRed-5
Rps28	3.51554e-45	0.357819	0.993	0.999	7.71977e-41	DsRed-5
Hap1	9.79623e-36	0.354877	0.916	0.763	2.15115e-31	DsRed-5
Sema6a	1.14998e-27	0.350353	0.692	0.65	2.52525e-23	DsRed-5
Cdh8	2.82728e-30	0.345959	0.383	0.215	6.20843e-26	DsRed-5
Fam183b	1.47544e-21	0.345084	0.571	0.45	3.23992e-17	DsRed-5
Efna5	1.9467e-27	0.344169	0.792	0.721	4.27475e-23	DsRed-5
Chst2	6.61466e-31	0.342015	0.56	0.362	1.45251e-26	DsRed-5
Brinp1	2.3658e-19	0.34064	0.628	0.594	5.19506e-15	DsRed-5
Tmem47	1.02235e-16	0.340484	0.466	0.385	2.24498e-12	DsRed-5
Rpl13a	3.71103e-13	0.33969	0.838	0.929	8.14906e-09	DsRed-5
Gm44644	2.44443e-18	0.339231	0.562	0.476	5.36773e-14	DsRed-5
Ahi1	2.49013e-37	0.338017	0.945	0.825	5.46808e-33	DsRed-5
Zcchc11	3.84296e-24	0.337067	0.664	0.636	8.43875e-20	DsRed-5
Kcnip4	1.69122e-28	0.332108	0.349	0.196	3.71375e-24	DsRed-5
Csmd2	7.7545e-24	0.331906	0.4	0.275	1.70281e-19	DsRed-5
Mum1l1	3.05539e-18	0.330916	0.297	0.184	6.70933e-14	DsRed-5
Meg3	3.18817e-15	0.329551	1	0.985	7.00089e-11	DsRed-5
Pcdh7	2.99598e-16	0.327519	0.502	0.408	6.57888e-12	DsRed-5
Olfm2	4.67331e-10	0.325733	0.712	0.737	1.02621e-05	DsRed-5
Luc7l2	7.1147e-27	0.322998	0.863	0.888	1.56232e-22	DsRed-5
Nup62cl	2.53123e-47	0.32118	0.214	0.055	5.55833e-43	DsRed-5
Csmd1	7.25015e-46	0.319394	0.294	0.107	1.59206e-41	DsRed-5
Pde4d	4.46247e-10	0.317192	0.286	0.213	9.79914e-06	DsRed-5
Nell1	2.37958e-23	0.31716	0.409	0.268	5.22532e-19	DsRed-5
Sorcs3	1.9349e-26	0.312693	0.374	0.219	4.24884e-22	DsRed-5
Pnmal1	1.82808e-21	0.312193	0.644	0.561	4.01427e-17	DsRed-5
Irf2bp2	3.76049e-17	0.311589	0.552	0.486	8.25765e-13	DsRed-5
Lsamp	1.32126e-19	0.307533	0.73	0.676	2.90135e-15	DsRed-5
Brinp3	3.3393e-19	0.306149	0.363	0.234	7.33276e-15	DsRed-5
Ypel3	2.67416e-34	0.305962	0.92	0.903	5.87218e-30	DsRed-5
Plp1	1.96878e-15	0.304772	0.361	0.257	4.32324e-11	DsRed-5
Ptprg	3.34333e-14	0.303931	0.416	0.338	7.34162e-10	DsRed-5
Pabpn1	5.35233e-22	0.303542	0.742	0.761	1.17532e-17	DsRed-5
Zcchc12	4.70265e-25	0.302956	0.856	0.736	1.03265e-20	DsRed-5
Uba52	1.19133e-13	0.302323	0.856	0.906	2.61605e-09	DsRed-5
Snrpf	3.29174e-30	0.302273	0.931	0.96	7.22834e-26	DsRed-5
Mta3	4.02747e-19	0.298463	0.335	0.22	8.84393e-15	DsRed-5
Dgkk	5.2678e-18	0.298145	0.391	0.257	1.15676e-13	DsRed-5
AW551984	6.5041e-19	0.29611	0.706	0.598	1.42824e-14	DsRed-5
Tmem163	4.31623e-28	0.292433	0.621	0.44	9.47801e-24	DsRed-5
Mad2l2	3.18325e-16	0.292414	0.657	0.615	6.99009e-12	DsRed-5
Kcnk10	3.14887e-18	0.291553	0.44	0.353	6.91459e-14	DsRed-5
Eif4a2	1.18352e-31	0.291003	0.986	0.99	2.59889e-27	DsRed-5
Htatsf1	2.09199e-13	0.290404	0.584	0.62	4.5938e-09	DsRed-5
Vcan	3.26105e-14	0.290295	0.484	0.389	7.16094e-10	DsRed-5
Trank1	1.17151e-12	0.288313	0.443	0.38	2.57253e-08	DsRed-5
Rsrp1	6.56078e-32	0.286188	0.961	0.982	1.44068e-27	DsRed-5
Phldb1	6.30688e-11	0.279753	0.443	0.412	1.38493e-06	DsRed-5
Slc38a2	4.03921e-17	0.279317	0.806	0.893	8.8697e-13	DsRed-5
Akap7	5.61206e-10	0.278872	0.443	0.405	1.23235e-05	DsRed-5
RFP	8.58777e-33	0.278778	1	1	1.88579e-28	DsRed-5
Camk4	2.1533e-13	0.278626	0.411	0.332	4.72842e-09	DsRed-5
Sobp	2.51731e-20	0.275881	0.714	0.719	5.52777e-16	DsRed-5
Epb41l4aos	1.85951e-06	0.275727	0.397	0.393	0.040833	DsRed-5
Ier2	4.15031e-09	0.275534	0.39	0.327	9.11367e-05	DsRed-5
Rit2	8.64835e-20	0.275146	0.683	0.515	1.89909e-15	DsRed-5
Slc24a5	1.40954e-12	0.274884	0.738	0.766	3.09521e-08	DsRed-5
Tmem108	5.02241e-13	0.27444	0.504	0.458	1.10287e-08	DsRed-5
Rpl27	1.31655e-20	0.273434	0.97	0.996	2.891e-16	DsRed-5
AC160336.1	2.58481e-08	0.273264	0.52	0.485	0.000567598	DsRed-5
Prrc2c	1.03688e-14	0.272607	0.754	0.816	2.27689e-10	DsRed-5
Gm5914	8.1667e-15	0.27246	0.447	0.37	1.79333e-10	DsRed-5
Plekha6	1.42841e-09	0.271555	0.399	0.361	3.13665e-05	DsRed-5
Fosb	1.05077e-05	0.271104	0.365	0.316	0.230739	DsRed-5
Pid1	2.77832e-09	0.270158	0.422	0.356	6.10092e-05	DsRed-5
C1qtnf4	5.16378e-19	0.269882	0.794	0.738	1.13391e-14	DsRed-5
Chd3os	9.74231e-21	0.269647	0.827	0.768	2.13931e-16	DsRed-5
Cntn5	2.99003e-10	0.26893	0.308	0.228	6.56582e-06	DsRed-5
Ptprd	0.000262725	0.268901	0.516	0.555	1	DsRed-5
Syt1	2.49512e-17	0.268616	0.724	0.669	5.47904e-13	DsRed-5
Snhg12	6.12332e-15	0.268555	0.625	0.613	1.34462e-10	DsRed-5
Rab26os	8.98246e-11	0.268119	0.326	0.255	1.97246e-06	DsRed-5
Frmpd3	2.38893e-15	0.265112	0.288	0.184	5.24586e-11	DsRed-5
Pak3	4.15921e-12	0.264599	0.819	0.839	9.13321e-08	DsRed-5
Fat1	2.60592e-20	0.264277	0.26	0.139	5.72235e-16	DsRed-5
Msi2	1.11365e-16	0.264169	0.687	0.685	2.44545e-12	DsRed-5
Nrep	4.36621e-10	0.263824	0.733	0.741	9.58776e-06	DsRed-5
Rpl37a	6.69161e-40	0.263361	0.991	1	1.46941e-35	DsRed-5
Hs6st2	1.28442e-10	0.26259	0.534	0.43	2.82047e-06	DsRed-5
Rgs4	7.79286e-06	0.262545	0.491	0.448	0.171123	DsRed-5
Arglu1	1.35308e-11	0.262479	0.797	0.846	2.97123e-07	DsRed-5
Pcp4	1.18953e-21	0.262154	0.749	0.581	2.61209e-17	DsRed-5
Ncan	7.4147e-12	0.260807	0.762	0.807	1.62819e-07	DsRed-5
Stk26	1.99824e-74	0.26002	0.199	0.031	4.38794e-70	DsRed-5
AC118542.1	3.70512e-14	0.259564	0.313	0.215	8.13607e-10	DsRed-5
Lrrc1	2.26962e-45	0.258813	0.272	0.094	4.98385e-41	DsRed-5
Scn3a	3.36311e-12	0.258153	0.671	0.678	7.38506e-08	DsRed-5
Maged1	1.21699e-23	0.2577	0.966	0.979	2.6724e-19	DsRed-5
Pnn	1.76103e-15	0.257221	0.74	0.81	3.86706e-11	DsRed-5
Macf1	1.65063e-16	0.257156	0.767	0.831	3.62463e-12	DsRed-5
Luc7l3	1.38292e-18	0.25604	0.845	0.895	3.03675e-14	DsRed-5
Eif3e	7.16591e-19	0.255865	0.934	0.973	1.57356e-14	DsRed-5
Rpl35a	1.12241e-48	0.255615	0.991	0.999	2.4647e-44	DsRed-5
Ccnl2	2.85105e-12	0.25442	0.678	0.733	6.26061e-08	DsRed-5
Nav1	1.26807e-17	0.254166	0.815	0.818	2.78456e-13	DsRed-5
Arhgef40	2.26814e-09	0.253899	0.416	0.376	4.98061e-05	DsRed-5
Slitrk1	1.41261e-13	0.252021	0.397	0.312	3.10195e-09	DsRed-5
Celf5	3.07748e-18	0.250711	0.797	0.837	6.75784e-14	DsRed-5
Irf2bpl	2.35419e-15	0.250404	0.746	0.765	5.16956e-11	DsRed-5
Itm2c	3.63142e-15	0.25035	0.802	0.812	7.97424e-11	DsRed-5
C130026L21Rik	1.4285e-13	0.249148	0.315	0.227	3.13683e-09	DsRed-5
Brd8	2.13257e-09	0.249121	0.569	0.62	4.68291e-05	DsRed-5
Rbbp6	2.12378e-19	0.2477	0.822	0.862	4.6636e-15	DsRed-5
Btg2	0.00022402	0.247563	0.272	0.234	1	DsRed-5
Rpl37	6.40881e-32	0.246574	0.993	1	1.40731e-27	DsRed-5
Xpr1	8.4951e-12	0.246542	0.831	0.872	1.86544e-07	DsRed-5
Pak7	6.96661e-09	0.246402	0.559	0.584	0.00015298	DsRed-5
Plxnc1	8.56433e-09	0.246366	0.479	0.46	0.000188064	DsRed-5
Peg10	4.79569e-16	0.246204	0.708	0.607	1.05308e-11	DsRed-5
Pfdn5	8.76662e-43	0.245961	0.975	0.996	1.92506e-38	DsRed-5
Mef2c	2.7539e-13	0.245804	0.246	0.143	6.04729e-09	DsRed-5
Leng8	1.15639e-05	0.245603	0.489	0.529	0.253932	DsRed-5

## Sheet: DsRed-6
Figure 1-source data 4 (corresponding to Figure1-figure supplement 3). Feature genes that define each of the 9 DsRed
clusters integrated across all six developmental stages.
The data are sorted from highest to lowest for each integrated custer by average log fold-change > 0.25 (avg_logFC)
of gene expression in the featured cluster relative to all other clusters.
pct.1, Percentage of cells in the indicated cluster with significant differential gene expression
pct.2, Percentage of cells in all other clusters with significant differential gene expression
p-val, p-value
p_val_adj, adjusted p-value for multiple comparisons
The Wilcoxon test was performed to identify the differentially expressed genes in each cluster
Gene	p_val	avg_logFC	pct.1	pct.2	p_val_adj	cluster
Cited1	3.58903e-46	1.1899	0.9	0.441	7.88115e-42	DsRed-6
Dlx5	0	1.08836	0.823	0.008	0	DsRed-6
Gad1	4.90921e-87	0.975813	0.846	0.219	1.07801e-82	DsRed-6
Slc32a1	2.30258e-164	0.959614	0.838	0.095	5.05624e-160	DsRed-6
Dlx2	0	0.820024	0.585	0.006	0	DsRed-6
Dlk1	7.42882e-23	0.77807	0.908	0.576	1.63129e-18	DsRed-6
Nrxn3	5.27099e-40	0.739284	0.908	0.477	1.15746e-35	DsRed-6
Ecel1	5.42801e-30	0.739224	0.638	0.271	1.19194e-25	DsRed-6
Dlx6	0	0.693739	0.646	0.005	0	DsRed-6
Pnoc	6.405e-51	0.684412	0.646	0.178	1.40647e-46	DsRed-6
Calb2	5.97731e-16	0.67668	0.708	0.408	1.31256e-11	DsRed-6
Nrsn1	1.41383e-18	0.667298	0.769	0.561	3.10463e-14	DsRed-6
Dlx1	0	0.645837	0.477	0.007	0	DsRed-6
Ndn	1.43816e-12	0.624358	0.877	0.825	3.15806e-08	DsRed-6
Pou2f2	2.84502e-27	0.618299	0.969	0.8	6.24739e-23	DsRed-6
Asb4	1.86321e-26	0.599558	0.823	0.428	4.09143e-22	DsRed-6
Hmx2	0	0.594906	0.492	0.006	0	DsRed-6
Chd3os	6.6217e-32	0.590604	0.946	0.77	1.45406e-27	DsRed-6
Pik3r1	7.20657e-19	0.573027	0.815	0.633	1.58249e-14	DsRed-6
Csrp2	2.77605e-17	0.560831	0.838	0.668	6.09593e-13	DsRed-6
mt-Nd4l	2.82734e-11	0.556741	0.846	0.764	6.20855e-07	DsRed-6
A2ml1	2.00349e-46	0.543235	0.6	0.149	4.39947e-42	DsRed-6
Zdbf2	4.96635e-19	0.504585	0.931	0.719	1.09056e-14	DsRed-6
Cox6a2	1.61146e-23	0.499041	0.415	0.135	3.53861e-19	DsRed-6
Scg2	9.10788e-17	0.481303	0.838	0.541	2e-12	DsRed-6
Rgs4	1.53388e-18	0.480769	0.785	0.444	3.36825e-14	DsRed-6
Zcchc12	1.62659e-18	0.479108	0.954	0.743	3.57182e-14	DsRed-6
Kcnip1	4.5401e-19	0.474802	0.685	0.409	9.9696e-15	DsRed-6
Atp2b1	5.40029e-10	0.473208	0.838	0.794	1.18585e-05	DsRed-6
Vsnl1	1.2285e-08	0.469756	0.546	0.343	0.000269767	DsRed-6
Peg10	2.38247e-17	0.468358	0.877	0.611	5.23166e-13	DsRed-6
Tbx3	4.2309e-20	0.45967	0.877	0.475	9.29063e-16	DsRed-6
Khdrbs3	4.93918e-13	0.442855	0.808	0.632	1.08459e-08	DsRed-6
Bub3	2.94809e-21	0.427796	0.9	0.775	6.47371e-17	DsRed-6
Alcam	6.78391e-06	0.4276	0.577	0.45	0.148968	DsRed-6
Adgrl2	1.96164e-17	0.421034	0.638	0.393	4.30757e-13	DsRed-6
Hap1	6.21106e-16	0.412633	0.954	0.774	1.36389e-11	DsRed-6
Tspan7	9.77297e-15	0.408613	0.838	0.703	2.14605e-10	DsRed-6
Jun	1.55089e-08	0.407756	0.746	0.576	0.00034056	DsRed-6
Zfhx3	1.27457e-17	0.406953	0.931	0.769	2.79882e-13	DsRed-6
Nrp2	8.21256e-13	0.382236	0.677	0.464	1.8034e-08	DsRed-6
Grin2b	1.6043e-12	0.380426	0.654	0.408	3.52287e-08	DsRed-6
Pcdh19	4.95807e-09	0.377708	0.615	0.435	0.000108874	DsRed-6
mt-Atp8	4.68136e-06	0.376193	0.638	0.535	0.102798	DsRed-6
Scg5	2.48093e-15	0.368663	0.969	0.87	5.44786e-11	DsRed-6
Gad2	2.21584e-18	0.366425	0.477	0.188	4.86577e-14	DsRed-6
Tekt1	1.50545e-48	0.356306	0.377	0.06	3.30582e-44	DsRed-6
Smarcd3	3.53355e-14	0.354599	0.9	0.759	7.75933e-10	DsRed-6
Aard	6.83015e-22	0.343224	0.431	0.156	1.49983e-17	DsRed-6
C1qtnf4	2.11947e-11	0.332723	0.885	0.74	4.65414e-07	DsRed-6
Dpp6	5.19238e-09	0.332227	0.731	0.58	0.000114019	DsRed-6
Pcdh7	1.73521e-10	0.330723	0.623	0.412	3.81036e-06	DsRed-6
Pdyn	4.13382e-16	0.3263	0.477	0.219	9.07746e-12	DsRed-6
Ralyl	1.36272e-12	0.322512	0.777	0.558	2.9924e-08	DsRed-6
6330403K07Rik	1.2034e-16	0.318009	1	0.988	2.64254e-12	DsRed-6
H2afz	2.64664e-22	0.316583	1	0.995	5.81177e-18	DsRed-6
Stmn4	2.20325e-11	0.316195	0.985	0.928	4.83812e-07	DsRed-6
Pkig	7.21122e-11	0.316057	0.885	0.758	1.58351e-06	DsRed-6
Syt5	1.11916e-10	0.313531	0.769	0.593	2.45757e-06	DsRed-6
Gm42418	0.003232	0.312052	0.608	0.582	1	DsRed-6
Flywch2	1.13127e-10	0.311253	0.777	0.642	2.48415e-06	DsRed-6
Dlx6os1	2.38908e-153	0.309362	0.192	0.002	5.24618e-149	DsRed-6
mt-Nd3	3.51179e-09	0.308971	0.969	0.955	7.71154e-05	DsRed-6
Gprasp2	2.25235e-11	0.30489	0.9	0.744	4.94593e-07	DsRed-6
Podxl2	2.7056e-10	0.30206	0.992	0.942	5.94123e-06	DsRed-6
Zfhx4	1.58333e-11	0.301594	0.731	0.514	3.47683e-07	DsRed-6
Ahi1	3.03893e-09	0.301342	0.946	0.834	6.67318e-05	DsRed-6
Klf5	1.23482e-09	0.300052	0.408	0.217	2.71154e-05	DsRed-6
Tmem35a	7.30158e-11	0.299501	0.715	0.48	1.60335e-06	DsRed-6
Sox4	1.76308e-08	0.299171	1	0.922	0.000387155	DsRed-6
Pcdh10	2.12252e-07	0.299126	0.631	0.491	0.00466084	DsRed-6
Sesn3	4.05328e-10	0.298393	0.685	0.504	8.9006e-06	DsRed-6
Adgrb3	5.37403e-09	0.298078	0.677	0.524	0.000118008	DsRed-6
Luzp2	2.33992e-09	0.295875	0.392	0.216	5.13823e-05	DsRed-6
Barhl2	1.93746e-17	0.293891	0.146	0.024	4.25447e-13	DsRed-6
Snap47	8.9952e-10	0.292701	0.9	0.851	1.97526e-05	DsRed-6
Tia1	2.19203e-08	0.292084	0.954	0.906	0.000481347	DsRed-6
Itm2c	9.63655e-13	0.28646	0.938	0.809	2.11609e-08	DsRed-6
Elmod1	3.60619e-11	0.284605	0.585	0.363	7.91884e-07	DsRed-6
Pnmal2	8.93306e-10	0.284585	0.9	0.729	1.96161e-05	DsRed-6
Zcchc18	1.02645e-08	0.282758	0.915	0.797	0.000225399	DsRed-6
Efna5	1.4722e-08	0.280893	0.854	0.725	0.00032328	DsRed-6
Nrxn1	9.32092e-06	0.280543	0.823	0.805	0.204678	DsRed-6
1500035N22Rik	1.96226e-11	0.278412	0.446	0.233	4.30893e-07	DsRed-6
Nr5a2	5.97953e-18	0.277721	0.431	0.16	1.31305e-13	DsRed-6
Dtd1	8.21585e-08	0.276871	0.785	0.69	0.00180412	DsRed-6
Hmx3	3.45462e-252	0.275009	0.323	0.004	7.58601e-248	DsRed-6
Snrpg	1.02371e-07	0.275003	0.985	0.972	0.00224797	DsRed-6
Cib2	4.45872e-09	0.271508	0.769	0.647	9.79091e-05	DsRed-6
Med4	1.45839e-12	0.270741	0.738	0.567	3.20247e-08	DsRed-6
Cirbp	3.14453e-14	0.270471	1	0.985	6.90506e-10	DsRed-6
Wdfy1	1.43408e-11	0.269898	0.738	0.531	3.14909e-07	DsRed-6
Mef2c	2.74306e-14	0.267518	0.377	0.148	6.02348e-10	DsRed-6
Tle2	4.09009e-16	0.263568	0.408	0.161	8.98142e-12	DsRed-6
Rab12	2.59264e-05	0.263116	0.654	0.553	0.569318	DsRed-6
Irf2bpl	6.28794e-10	0.262946	0.885	0.76	1.38077e-05	DsRed-6
Pnck	4.98851e-10	0.262328	0.808	0.602	1.09543e-05	DsRed-6
Anks1b	3.37128e-09	0.262008	0.6	0.404	7.403e-05	DsRed-6
Psd	1.1883e-07	0.258532	0.831	0.675	0.00260938	DsRed-6
Dtx1	2.44294e-09	0.258479	0.708	0.529	5.36446e-05	DsRed-6
Slitrk4	3.73419e-13	0.258472	0.377	0.167	8.1999e-09	DsRed-6
Irak1bp1	9.49131e-11	0.258274	0.762	0.585	2.0842e-06	DsRed-6
Ccdc34	4.19215e-08	0.257394	0.762	0.643	0.000920554	DsRed-6
Gkap1	4.25052e-07	0.256172	0.792	0.664	0.00933372	DsRed-6
Sh3gl3	1.39956e-07	0.253788	0.669	0.548	0.0030733	DsRed-6
Wdr34	3.77458e-09	0.253575	0.615	0.454	8.2886e-05	DsRed-6
Syt1	1.25099e-08	0.252566	0.831	0.671	0.000274704	DsRed-6
Zfhx2	9.17549e-10	0.251568	0.731	0.535	2.01484e-05	DsRed-6
Eef1a2	1.72186e-07	0.251391	0.862	0.652	0.00378103	DsRed-6
Ubc	1.50512e-06	0.24938	0.946	0.954	0.0330509	DsRed-6
Gria2	1.03237e-08	0.248564	0.938	0.769	0.000226698	DsRed-6
Peg3	1.98004e-10	0.248488	0.969	0.861	4.34798e-06	DsRed-6
Wdr6	8.06601e-11	0.246831	0.938	0.872	1.77122e-06	DsRed-6
Grm5	5.36959e-05	0.246333	0.462	0.333	1	DsRed-6
Magel2	0.000974658	0.245995	0.677	0.624	1	DsRed-6
A730017C20Rik	8.52617e-07	0.245887	0.877	0.772	0.0187226	DsRed-6

## Sheet: DsRed-7
Figure 1-source data 4 (corresponding to Figure1-figure supplement 3). Feature genes that define each of the 9 DsRed
clusters integrated across all six developmental stages.
The data are sorted from highest to lowest for each integrated custer by average log fold-change > 0.25 (avg_logFC)
of gene expression in the featured cluster relative to all other clusters.
pct.1, Percentage of cells in the indicated cluster with significant differential gene expression
pct.2, Percentage of cells in all other clusters with significant differential gene expression
p-val, p-value
p_val_adj, adjusted p-value for multiple comparisons
The Wilcoxon test was performed to identify the differentially expressed genes in each cluster
Gene	p_val	avg_logFC	pct.1	pct.2	p_val_adj	cluster
Pitx2	1.7024e-253	2.29364	0.906	0.072	3.7383e-249	DsRed-7
Barhl1	0	2.18981	0.78	0.027	0	DsRed-7
Foxa1	2.21021e-243	1.93415	0.929	0.081	4.8534e-239	DsRed-7
C130021I20Rik	4.6335e-250	1.4837	0.929	0.077	1.01747e-245	DsRed-7
Pou3f4	3.05788e-119	1.39728	0.819	0.139	6.7148e-115	DsRed-7
Foxp2	1.22168e-123	1.36645	0.898	0.174	2.68269e-119	DsRed-7
Irx5	5.53918e-79	1.29546	0.709	0.148	1.21635e-74	DsRed-7
Sox4	5.50611e-35	1.18979	0.984	0.922	1.20909e-30	DsRed-7
C1ql1	2.25599e-131	1.16264	0.827	0.113	4.95392e-127	DsRed-7
Lmx1a	2.2882e-191	1.11474	0.843	0.08	5.02466e-187	DsRed-7
Chgb	1.43313e-18	1.10871	0.866	0.78	3.147e-14	DsRed-7
Cck	6.40998e-193	1.08132	0.417	0.015	1.40757e-188	DsRed-7
Celf2	1.31471e-47	1.07961	0.992	0.888	2.88698e-43	DsRed-7
Irx6	8.11471e-83	1.05045	0.504	0.066	1.78191e-78	DsRed-7
Uncx	6.22408e-125	1.04703	0.835	0.125	1.36675e-120	DsRed-7
Igfbpl1	1.35396e-20	1.03959	0.764	0.461	2.97316e-16	DsRed-7
Irx3	9.21878e-63	0.897731	0.606	0.125	2.02435e-58	DsRed-7
Nxph1	2.14565e-38	0.896071	0.614	0.219	4.71164e-34	DsRed-7
Pxylp1	5.56616e-41	0.858445	0.709	0.284	1.22227e-36	DsRed-7
Pou3f1	1.11466e-44	0.844464	0.488	0.11	2.44767e-40	DsRed-7
Adcyap1	1.11372e-60	0.825564	0.598	0.133	2.44562e-56	DsRed-7
Rab3c	2.12528e-48	0.814449	0.961	0.683	4.66691e-44	DsRed-7
Barhl2	2.30266e-289	0.795949	0.543	0.016	5.05641e-285	DsRed-7
Hist3h2a	2.04138e-18	0.786902	0.803	0.604	4.48267e-14	DsRed-7
Lsamp	3.68533e-33	0.774103	0.921	0.676	8.09262e-29	DsRed-7
Cacna2d1	1.69096e-33	0.765573	0.913	0.629	3.71319e-29	DsRed-7
Foxp1	4.11172e-26	0.747855	0.787	0.536	9.02892e-22	DsRed-7
Hist3h2ba	6.90781e-19	0.736393	0.961	0.936	1.51689e-14	DsRed-7
Cd24a	8.22822e-27	0.731715	0.929	0.752	1.80684e-22	DsRed-7
Elavl2	1.88988e-34	0.727624	0.953	0.697	4.14999e-30	DsRed-7
Nr4a2	6.06498e-32	0.706974	0.78	0.315	1.33181e-27	DsRed-7
Rmst	2.12034e-33	0.70642	0.906	0.649	4.65606e-29	DsRed-7
Cbln2	8.61914e-23	0.702041	0.677	0.32	1.89268e-18	DsRed-7
Tnrc6c	5.35969e-27	0.697564	0.953	0.871	1.17693e-22	DsRed-7
Tac1	1.30107e-05	0.67466	0.354	0.216	0.285703	DsRed-7
Nrep	2.47654e-25	0.670195	0.984	0.734	5.43824e-21	DsRed-7
Wnt5a	1.47283e-43	0.666158	0.52	0.132	3.23419e-39	DsRed-7
Lmx1b	2.34052e-131	0.660827	0.598	0.058	5.13955e-127	DsRed-7
Tsc22d1	9.32073e-38	0.647546	1	0.974	2.04674e-33	DsRed-7
Celf4	4.97437e-37	0.646147	1	0.931	1.09232e-32	DsRed-7
Slc17a6	2.71707e-31	0.642231	0.827	0.457	5.96641e-27	DsRed-7
Camk2n1	6.96802e-24	0.6367	0.906	0.766	1.53011e-19	DsRed-7
Bcl11a	8.85964e-27	0.632444	0.843	0.52	1.94549e-22	DsRed-7
Zcchc12	8.11928e-26	0.63056	1	0.742	1.78291e-21	DsRed-7
Zfhx4	5.44623e-23	0.629864	0.78	0.513	1.19594e-18	DsRed-7
Nnat	9.14201e-23	0.619482	1	0.997	2.00749e-18	DsRed-7
Cnn3	1.2909e-14	0.618388	0.787	0.51	2.83469e-10	DsRed-7
Zfhx3	1.15295e-16	0.616134	0.929	0.769	2.53177e-12	DsRed-7
Mir124-2hg	1.33289e-26	0.606609	0.693	0.296	2.9269e-22	DsRed-7
Dmrtb1	4.3376e-33	0.606511	0.583	0.181	9.52493e-29	DsRed-7
Gm28050	4.44561e-38	0.584947	0.535	0.164	9.76211e-34	DsRed-7
Bmp7	5.25329e-18	0.557961	0.465	0.192	1.15357e-13	DsRed-7
Iqcj	1.71317e-49	0.54988	0.417	0.074	3.76195e-45	DsRed-7
Atat1	5.84405e-20	0.548683	0.945	0.85	1.28329e-15	DsRed-7
Mycl	8.10786e-18	0.526666	0.795	0.59	1.78041e-13	DsRed-7
Igsf8	5.57974e-18	0.525517	0.614	0.366	1.22525e-13	DsRed-7
Pdzrn3	7.49126e-28	0.522068	0.354	0.086	1.64501e-23	DsRed-7
Serpini1	1.52428e-18	0.520689	0.693	0.423	3.34717e-14	DsRed-7
Syt4	1.12485e-15	0.510268	0.937	0.736	2.47005e-11	DsRed-7
Malat1	4.52974e-18	0.505244	1	0.999	9.94687e-14	DsRed-7
Sbk1	1.22965e-14	0.499796	0.921	0.857	2.7002e-10	DsRed-7
Ubqln2	3.5447e-15	0.496035	0.937	0.887	7.78381e-11	DsRed-7
Sox11	3.13895e-13	0.495713	0.953	0.902	6.89282e-09	DsRed-7
Thrb	6.46871e-42	0.486762	0.409	0.084	1.42046e-37	DsRed-7
Cyth2	3.15599e-18	0.481176	0.969	0.888	6.93025e-14	DsRed-7
Stmn1	1.14779e-34	0.48015	1	0.998	2.52043e-30	DsRed-7
Plppr1	2.31299e-23	0.479076	0.732	0.393	5.07909e-19	DsRed-7
Zfp618	2.1863e-12	0.463322	0.622	0.43	4.8009e-08	DsRed-7
Ntng1	2.57026e-05	0.459761	0.535	0.437	0.564403	DsRed-7
H2afv	2.90639e-13	0.444959	0.929	0.883	6.38214e-09	DsRed-7
Khdrbs1	2.0974e-11	0.441273	0.976	0.922	4.60567e-07	DsRed-7
H3f3b	4.11453e-21	0.42801	1	1	9.0351e-17	DsRed-7
Fam210b	5.15091e-28	0.423151	0.441	0.131	1.13109e-23	DsRed-7
Btg1	5.36645e-13	0.421786	0.874	0.766	1.17842e-08	DsRed-7
Uba1	2.96438e-10	0.421451	0.929	0.864	6.50949e-06	DsRed-7
Nrn1	6.02212e-17	0.420483	0.575	0.242	1.3224e-12	DsRed-7
Mpnd	2.9478e-11	0.414453	0.89	0.79	6.47308e-07	DsRed-7
Tuba1a	6.86719e-14	0.414268	1	0.999	1.50797e-09	DsRed-7
Klhl1	5.06751e-32	0.413062	0.528	0.156	1.11278e-27	DsRed-7
Arpp21	8.4772e-09	0.401093	0.252	0.109	0.000186151	DsRed-7
Pbx1	1.33182e-15	0.397526	0.976	0.894	2.92455e-11	DsRed-7
Hdac2	2.12304e-12	0.395568	0.969	0.949	4.66199e-08	DsRed-7
Fscn1	1.83877e-14	0.393587	0.992	0.963	4.03776e-10	DsRed-7
Shd	1.89971e-15	0.38888	0.866	0.721	4.17157e-11	DsRed-7
Ptma	1.50189e-18	0.388577	1	0.999	3.298e-14	DsRed-7
Rnf165	4.1268e-11	0.386167	0.913	0.734	9.06204e-07	DsRed-7
Cdc42ep3	2.17324e-14	0.385535	0.732	0.512	4.77222e-10	DsRed-7
Pdzrn4	4.42641e-15	0.382221	0.37	0.139	9.71996e-11	DsRed-7
Eif4g2	1.13143e-17	0.379129	1	0.995	2.4845e-13	DsRed-7
H2afy2	2.68363e-12	0.378845	0.976	0.933	5.89298e-08	DsRed-7
Dcx	4.36015e-11	0.378709	0.929	0.879	9.57446e-07	DsRed-7
Tle2	2.49537e-35	0.37734	0.543	0.158	5.47959e-31	DsRed-7
Lingo2	2.65045e-13	0.376362	0.496	0.259	5.82012e-09	DsRed-7
Nexmif	0.000164992	0.375414	0.567	0.503	1	DsRed-7
Tubb2b	4.93244e-19	0.375021	1	0.997	1.08311e-14	DsRed-7
Maged1	2.1712e-15	0.374111	0.992	0.977	4.76775e-11	DsRed-7
Zfhx2	3.25251e-13	0.374039	0.724	0.536	7.14219e-09	DsRed-7
Ddah2	7.95749e-13	0.371546	0.969	0.861	1.74739e-08	DsRed-7
Dbn1	2.29345e-13	0.370268	0.992	0.95	5.03618e-09	DsRed-7
Elmo1	8.92375e-13	0.362116	0.701	0.503	1.95957e-08	DsRed-7
Traf4	3.90455e-07	0.361158	0.827	0.686	0.008574	DsRed-7
March1	6.73256e-06	0.358396	0.496	0.383	0.14784	DsRed-7
Tox3	3.74025e-08	0.356792	0.74	0.631	0.000821323	DsRed-7
Slc38a2	2.88667e-09	0.355628	0.906	0.884	6.33885e-05	DsRed-7
Smarce1	3.75839e-11	0.352432	0.906	0.881	8.25306e-07	DsRed-7
Rapgef5	4.69429e-09	0.346664	0.425	0.246	0.000103082	DsRed-7
Chd3	6.88535e-10	0.343554	0.811	0.768	1.51195e-05	DsRed-7
Zfp422	2.34857e-09	0.342768	0.787	0.673	5.15722e-05	DsRed-7
Sulf1	1.82291e-24	0.341571	0.409	0.123	4.00294e-20	DsRed-7
Gtf2ird1	4.20792e-14	0.337742	0.646	0.414	9.24017e-10	DsRed-7
Rbm4b	1.18291e-09	0.335534	0.906	0.896	2.59756e-05	DsRed-7
Svbp	1.95193e-08	0.333173	0.898	0.846	0.000428623	DsRed-7
Trim28	1.25205e-08	0.333019	0.906	0.851	0.000274938	DsRed-7
Nsg2	6.50737e-14	0.332507	0.976	0.917	1.42895e-09	DsRed-7
Fam57b	1.40135e-08	0.332454	0.89	0.804	0.000307723	DsRed-7
Zfp462	6.13277e-08	0.332219	0.693	0.58	0.00134669	DsRed-7
Ddx5	1.9168e-11	0.328598	1	0.994	4.20909e-07	DsRed-7
Ip6k2	1.61422e-08	0.328327	0.898	0.825	0.000354466	DsRed-7
Pcdh7	3.54708e-06	0.327437	0.551	0.414	0.0778904	DsRed-7
Bcl11b	1.21878e-15	0.326771	0.449	0.184	2.67631e-11	DsRed-7
Nfix	6.59249e-06	0.326353	0.157	0.062	0.144765	DsRed-7
Peli1	3.15398e-10	0.325592	0.835	0.73	6.92583e-06	DsRed-7
Gpm6a	5.58683e-09	0.324451	0.937	0.868	0.000122681	DsRed-7
Ypel1	1.72674e-08	0.323369	0.709	0.582	0.000379176	DsRed-7
Kcnip3	3.15974e-28	0.322222	0.323	0.071	6.93848e-24	DsRed-7
Tubb3	1.13061e-15	0.320547	1	0.99	2.48271e-11	DsRed-7
Aplp1	7.21437e-12	0.31911	0.984	0.969	1.5842e-07	DsRed-7
Epha3	2.21194e-32	0.31868	0.346	0.071	4.8572e-28	DsRed-7
Epha5	0.000112002	0.318537	0.575	0.452	1	DsRed-7
Gdpd1	3.32799e-08	0.316517	0.843	0.777	0.000730794	DsRed-7
Phf21b	3.59146e-08	0.315559	0.425	0.254	0.00078865	DsRed-7
Narf	5.40191e-07	0.315149	0.614	0.498	0.011862	DsRed-7
H3f3a	6.88298e-17	0.31407	1	0.998	1.51143e-12	DsRed-7
Pbx3	4.15647e-11	0.311934	0.535	0.314	9.1272e-07	DsRed-7
Fez1	7.91094e-12	0.31176	0.984	0.939	1.73716e-07	DsRed-7
Mn1	2.04755e-08	0.309159	0.709	0.535	0.000449622	DsRed-7
Plppr3	2.64851e-09	0.309135	0.953	0.889	5.81587e-05	DsRed-7
Arf2	5.72735e-11	0.308404	0.803	0.68	1.25767e-06	DsRed-7
Bag6	2.95777e-08	0.308378	0.85	0.799	0.000649498	DsRed-7
Robo2	0.000117699	0.308149	0.559	0.463	1	DsRed-7
Hnrnph3	1.29244e-08	0.306583	0.937	0.828	0.000283806	DsRed-7
Wbp1	3.3706e-06	0.305747	0.772	0.677	0.0740151	DsRed-7
Kdm2b	9.73413e-07	0.305339	0.74	0.702	0.0213752	DsRed-7
Chl1	1.61581e-05	0.304182	0.591	0.466	0.354816	DsRed-7
Cacfd1	5.79328e-10	0.302853	0.858	0.79	1.27215e-05	DsRed-7
Smarca4	1.21187e-07	0.302805	0.882	0.843	0.00266115	DsRed-7
Hnrnpr	3.57331e-11	0.300216	0.937	0.911	7.84663e-07	DsRed-7
Carhsp1	1.62265e-08	0.300101	0.921	0.702	0.000356317	DsRed-7
Srsf4	1.24306e-08	0.299407	0.74	0.653	0.000272964	DsRed-7
Pantr1	5.30694e-18	0.299163	0.457	0.17	1.16535e-13	DsRed-7
Tmeff1	3.18695e-10	0.298811	0.976	0.89	6.99822e-06	DsRed-7
Tmem163	1.29851e-09	0.297174	0.677	0.453	2.8514e-05	DsRed-7
Hmgn1	1.07839e-09	0.296278	1	0.992	2.36804e-05	DsRed-7
Zfand5	1.18095e-12	0.295735	0.937	0.932	2.59325e-08	DsRed-7
Sorbs2	0.000143811	0.295095	0.63	0.571	1	DsRed-7
Snn	7.03093e-10	0.295009	0.795	0.648	1.54392e-05	DsRed-7
Epb41l4a	2.21308e-09	0.294254	0.52	0.329	4.8597e-05	DsRed-7
Nsg1	2.21775e-13	0.292101	0.984	0.981	4.86997e-09	DsRed-7
Cacnb3	5.60681e-10	0.29197	0.89	0.801	1.2312e-05	DsRed-7
Mex3b	3.85561e-09	0.290895	0.512	0.322	8.46653e-05	DsRed-7
Dock4	8.55438e-11	0.290611	0.543	0.334	1.87846e-06	DsRed-7
Rgmb	5.55633e-07	0.289683	0.717	0.615	0.0122011	DsRed-7
Nap1l4	5.37173e-08	0.288842	0.874	0.871	0.00117958	DsRed-7
Samd14	5.16277e-09	0.288632	0.906	0.869	0.000113369	DsRed-7
Kctd4	3.82594e-20	0.288497	0.386	0.126	8.40138e-16	DsRed-7
Trib2	5.6452e-11	0.28791	0.685	0.475	1.23963e-06	DsRed-7
Tubb4a	1.09545e-07	0.287167	0.937	0.877	0.00240551	DsRed-7
Smarca2	5.59704e-09	0.286729	0.819	0.781	0.000122905	DsRed-7
Plk2	3.82418e-08	0.286669	0.661	0.488	0.000839751	DsRed-7
Gstm7	3.72439e-05	0.282703	0.63	0.561	0.817839	DsRed-7
Gm2694	2.58545e-05	0.280952	0.614	0.449	0.567739	DsRed-7
Dbndd1	1.1275e-06	0.280473	0.661	0.58	0.0247588	DsRed-7
Edil3	2.8679e-07	0.279779	0.606	0.435	0.00629762	DsRed-7
Bcl2l1	2.57581e-07	0.279308	0.795	0.696	0.00565621	DsRed-7
Mtf2	4.09057e-05	0.279261	0.685	0.623	0.898247	DsRed-7
Marcksl1	7.01304e-15	0.278673	1	0.996	1.53999e-10	DsRed-7
Slc1a2	8.01656e-08	0.278662	0.559	0.401	0.00176036	DsRed-7
Acvr2b	9.46932e-06	0.277791	0.709	0.649	0.207937	DsRed-7
Cxcr4	2.44007e-15	0.277193	0.213	0.053	5.35814e-11	DsRed-7
Hmgb3	2.54959e-08	0.276163	0.984	0.973	0.000559865	DsRed-7
Exoc4	9.05395e-07	0.275489	0.559	0.443	0.0198816	DsRed-7
Rab11b	6.65956e-13	0.273996	0.992	0.967	1.46237e-08	DsRed-7
Mex3a	7.81034e-05	0.27273	0.724	0.637	1	DsRed-7
Ddc	4.43545e-05	0.272076	0.268	0.158	0.97398	DsRed-7
Msi1	0.00191217	0.27182	0.677	0.642	1	DsRed-7
Hnrnpdl	2.4524e-10	0.271819	0.992	0.961	5.38523e-06	DsRed-7
Midn	6.54842e-05	0.269625	0.78	0.726	1	DsRed-7
Dlgap4	3.48245e-08	0.269373	0.945	0.92	0.000764711	DsRed-7
Vangl2	0.000472927	0.26898	0.701	0.684	1	DsRed-7
Tmem35a	1.42864e-12	0.268522	0.764	0.479	3.13716e-08	DsRed-7
Rbmx	6.21049e-06	0.267994	0.795	0.685	0.136376	DsRed-7
Vash2	9.80161e-07	0.267633	0.504	0.368	0.0215234	DsRed-7
Nkain3	6.06971e-06	0.266378	0.543	0.409	0.133285	DsRed-7
Psip1	3.54503e-09	0.265499	0.984	0.948	7.78453e-05	DsRed-7
Zfp536	1.79657e-10	0.265325	0.394	0.192	3.9451e-06	DsRed-7
C1ql3	4.37944e-10	0.265169	0.189	0.061	9.6168e-06	DsRed-7
Ivns1abp	7.05867e-09	0.264929	0.882	0.766	0.000155001	DsRed-7
Idh1	9.99102e-06	0.264755	0.921	0.885	0.219393	DsRed-7
Nono	1.07929e-06	0.264549	0.961	0.957	0.0237	DsRed-7
Ank3	4.10134e-07	0.263653	0.945	0.909	0.00900614	DsRed-7
Ing4	2.19038e-07	0.262375	0.772	0.679	0.00480986	DsRed-7
Pnrc1	5.00503e-06	0.262329	0.74	0.68	0.109905	DsRed-7
Ncan	0.000650274	0.262241	0.819	0.802	1	DsRed-7
Ewsr1	7.00966e-10	0.262209	0.945	0.9	1.53925e-05	DsRed-7
Slco5a1	0.000183102	0.260924	0.331	0.225	1	DsRed-7
Zbtb20	3.23392e-08	0.260479	0.906	0.805	0.000710135	DsRed-7
Apc2	0.000200575	0.259436	0.732	0.724	1	DsRed-7
Rnf38	2.25517e-05	0.258508	0.63	0.548	0.495212	DsRed-7
Rnd1	3.73204e-29	0.257654	0.315	0.066	8.19519e-25	DsRed-7
Ptpre	3.69272e-10	0.257561	0.331	0.153	8.10884e-06	DsRed-7
Fam110a	1.91892e-08	0.257473	0.535	0.365	0.000421377	DsRed-7
Khdrbs2	1.11383e-07	0.257128	0.559	0.413	0.00244587	DsRed-7
Dpysl3	2.51521e-09	0.256579	0.992	0.948	5.52314e-05	DsRed-7
Kdm5b	0.0020052	0.256298	0.693	0.718	1	DsRed-7
Pknox2	1.82074e-10	0.25626	0.299	0.128	3.99816e-06	DsRed-7
Cdk5r1	2.05135e-08	0.255892	0.976	0.904	0.000450456	DsRed-7
Tmem57	9.50139e-08	0.254156	0.756	0.741	0.00208641	DsRed-7
Ezh2	2.65936e-05	0.253564	0.512	0.381	0.583969	DsRed-7
Sfpq	9.40377e-05	0.253446	0.937	0.943	1	DsRed-7
Actg1	3.72862e-10	0.253326	1	1	8.18767e-06	DsRed-7
Zfand6	2.54086e-06	0.25311	0.819	0.795	0.0557948	DsRed-7
Fibp	5.1604e-07	0.253036	0.811	0.752	0.0113317	DsRed-7
Sh3bp5	8.03606e-05	0.2527	0.724	0.648	1	DsRed-7
Klhl35	2.95123e-07	0.252248	0.213	0.09	0.00648061	DsRed-7
Erbb4	3.77198e-07	0.251042	0.339	0.192	0.00828289	DsRed-7
Morn4	3.12327e-07	0.250966	0.646	0.534	0.00685838	DsRed-7
Adgrg1	0.00125607	0.250532	0.661	0.642	1	DsRed-7
Top1	5.90067e-07	0.249821	0.984	0.937	0.0129573	DsRed-7
Fnbp1l	5.18324e-07	0.249042	0.913	0.899	0.0113819	DsRed-7
Raf1	6.29523e-05	0.248143	0.709	0.686	1	DsRed-7
Nt5dc2	9.6558e-05	0.247215	0.756	0.687	1	DsRed-7
Dll3	1.20439e-06	0.246355	0.362	0.212	0.0264473	DsRed-7
Hes6	5.26549e-08	0.24635	0.787	0.676	0.00115625	DsRed-7
Sorcs2	2.36492e-17	0.245687	0.339	0.111	5.19314e-13	DsRed-7

## Sheet: DsRed-8
Figure 1-source data 4 (corresponding to Figure1-figure supplement 3). Feature genes that define each of the 9 DsRed
clusters integrated across all six developmental stages.
The data are sorted from highest to lowest for each integrated custer by average log fold-change > 0.25 (avg_logFC)
of gene expression in the featured cluster relative to all other clusters.
pct.1, Percentage of cells in the indicated cluster with significant differential gene expression
pct.2, Percentage of cells in all other clusters with significant differential gene expression
p-val, p-value
p_val_adj, adjusted p-value for multiple comparisons
The Wilcoxon test was performed to identify the differentially expressed genes in each cluster
Gene	p_val	avg_logFC	pct.1	pct.2	p_val_adj	cluster
Apoe	2.61831e-80	3.65394	1	0.299	5.74956e-76	DsRed-8
C1qb	7.9318e-206	3.64567	1	0.082	1.74174e-201	DsRed-8
Hexb	6.12907e-85	3.62128	0.952	0.226	1.34588e-80	DsRed-8
C1qc	4.73913e-242	3.48445	1	0.066	1.04067e-237	DsRed-8
C1qa	1.38968e-198	3.46797	1	0.086	3.0516e-194	DsRed-8
Cst3	3.54814e-54	3.36487	1	0.945	7.79136e-50	DsRed-8
Selenop	1.08239e-178	3.11064	1	0.099	2.37682e-174	DsRed-8
Lgmn	9.50391e-67	3.057	1	0.426	2.08696e-62	DsRed-8
Tyrobp	1.47792e-296	2.97714	1	0.05	3.24536e-292	DsRed-8
Sparc	6.92392e-153	2.95353	0.952	0.103	1.52042e-148	DsRed-8
Ctss	0	2.93277	0.988	0.041	0	DsRed-8
Fcrls	0	2.91487	0.988	0.045	0	DsRed-8
P2ry12	0	2.89704	0.976	0.032	0	DsRed-8
Csf1r	0	2.8564	1	0.041	0	DsRed-8
Fcer1g	0	2.78491	1	0.04	0	DsRed-8
Ctsd	6.7974e-56	2.75998	1	0.662	1.49264e-51	DsRed-8
Crybb1	0	2.64879	0.904	0.03	0	DsRed-8
Trem2	0	2.54387	0.976	0.042	0	DsRed-8
Laptm5	0	2.37638	1	0.033	0	DsRed-8
Ly86	0	2.34408	1	0.021	0	DsRed-8
Cx3cr1	0	2.34391	0.976	0.024	0	DsRed-8
Itm2b	8.65805e-54	2.32806	1	0.881	1.90122e-49	DsRed-8
Ccl3	1.92617e-166	2.29709	0.747	0.051	4.22969e-162	DsRed-8
Ctsb	7.87698e-56	2.28921	1	0.727	1.72971e-51	DsRed-8
Rgs10	2.09505e-97	2.23077	1	0.218	4.60051e-93	DsRed-8
Gpr34	0	2.20224	0.94	0.017	0	DsRed-8
Ctsl	1.89297e-52	2.1987	1	0.75	4.15677e-48	DsRed-8
Grn	7.69978e-84	2.14265	1	0.282	1.69079e-79	DsRed-8
Unc93b1	0	2.10488	1	0.028	0	DsRed-8
Nfkbia	3.01274e-46	2.07818	0.892	0.397	6.61567e-42	DsRed-8
Ier3	4.95161e-129	2.07377	0.855	0.096	1.08732e-124	DsRed-8
Fcgr3	0	2.07227	0.964	0.02	0	DsRed-8
Selplg	1.61072e-160	2.06314	0.904	0.084	3.53697e-156	DsRed-8
B2m	3.16921e-97	2.04661	0.988	0.215	6.95926e-93	DsRed-8
Ctsz	7.37695e-68	2.04201	0.988	0.364	1.6199e-63	DsRed-8
Ccl4	3.50779e-158	1.99994	0.614	0.034	7.70276e-154	DsRed-8
Arpc1b	1.08893e-161	1.99288	1	0.112	2.39119e-157	DsRed-8
Cyba	2.21612e-253	1.97333	0.976	0.058	4.86638e-249	DsRed-8
Junb	1.59765e-53	1.93124	0.964	0.398	3.50828e-49	DsRed-8
Ltc4s	0	1.92529	0.928	0.018	0	DsRed-8
Tmem119	0	1.90264	0.904	0.026	0	DsRed-8
Ifngr1	8.35106e-141	1.87926	0.964	0.12	1.83381e-136	DsRed-8
Sirpa	1.97137e-67	1.83638	1	0.376	4.32892e-63	DsRed-8
Serinc3	1.95303e-53	1.82537	1	0.675	4.28865e-49	DsRed-8
Mef2c	3.45474e-128	1.79715	0.988	0.141	7.58627e-124	DsRed-8
Spi1	0	1.79227	0.976	0.015	0	DsRed-8
Sat1	1.89867e-66	1.78649	0.988	0.369	4.16928e-62	DsRed-8
Itgb5	0	1.78337	0.928	0.033	0	DsRed-8
Lyz2	2.81236e-252	1.77388	0.651	0.021	6.17565e-248	DsRed-8
Pld4	0	1.77259	0.988	0.022	0	DsRed-8
Hmox1	2.81796e-101	1.77203	0.542	0.043	6.18795e-97	DsRed-8
Olfml3	1.1654e-301	1.75571	0.916	0.039	2.5591e-297	DsRed-8
Cd9	6.24273e-148	1.73407	0.928	0.1	1.37084e-143	DsRed-8
Maf	5.65521e-170	1.72882	0.964	0.093	1.24183e-165	DsRed-8
Cyth4	0	1.69435	0.976	0.014	0	DsRed-8
Anxa3	0	1.69003	0.964	0.034	0	DsRed-8
Hpgds	4.24332e-202	1.67961	1	0.083	9.3179e-198	DsRed-8
Man2b1	4.82549e-115	1.66057	0.988	0.165	1.05963e-110	DsRed-8
Qk	5.83448e-69	1.64145	0.988	0.324	1.28119e-64	DsRed-8
Aif1	0	1.63	0.976	0.023	0	DsRed-8
Txnip	1.05672e-129	1.60612	0.867	0.098	2.32046e-125	DsRed-8
Lpcat2	1.29225e-215	1.58359	0.892	0.057	2.83764e-211	DsRed-8
Glul	2.86393e-54	1.58023	1	0.477	6.2889e-50	DsRed-8
Hexa	8.61021e-56	1.57798	0.976	0.459	1.89072e-51	DsRed-8
Ctsa	1.91882e-62	1.56603	0.976	0.376	4.21354e-58	DsRed-8
Ccl2	5.14354e-222	1.55287	0.614	0.022	1.12947e-217	DsRed-8
Trf	1.53625e-194	1.55183	0.952	0.075	3.37345e-190	DsRed-8
Cd53	0	1.54845	0.952	0.012	0	DsRed-8
Bin1	1.39929e-49	1.54219	1	0.728	3.0727e-45	DsRed-8
Gadd45b	5.05506e-96	1.53593	0.663	0.072	1.11004e-91	DsRed-8
Kctd12	4.8967e-104	1.53095	0.988	0.183	1.07527e-99	DsRed-8
Cyfip1	1.1882e-84	1.52529	0.94	0.208	2.60916e-80	DsRed-8
Rnase4	1.85836e-222	1.4986	0.928	0.06	4.08078e-218	DsRed-8
Siglech	0	1.48888	0.867	0.01	0	DsRed-8
Vsir	0	1.47642	0.952	0.011	0	DsRed-8
Tgfb1	1.3666e-221	1.46857	0.976	0.068	3.00092e-217	DsRed-8
Snx5	2.87115e-55	1.4454	0.976	0.478	6.30476e-51	DsRed-8
Fam105a	2.6391e-105	1.44285	0.952	0.159	5.7952e-101	DsRed-8
Pnp	9.34583e-61	1.43606	0.928	0.302	2.05225e-56	DsRed-8
Tmsb4x	8.40517e-49	1.41781	1	0.999	1.84569e-44	DsRed-8
Ptpn18	1.04785e-296	1.41549	0.952	0.044	2.30096e-292	DsRed-8
Mt1	1.18581e-55	1.41007	0.855	0.235	2.60391e-51	DsRed-8
Npl	1.25689e-195	1.40746	0.928	0.071	2.76001e-191	DsRed-8
Cd68	1.91755e-245	1.39771	0.904	0.049	4.21074e-241	DsRed-8
Evi2a	0	1.38122	0.904	0.013	0	DsRed-8
Cd81	6.31764e-39	1.37352	0.988	0.896	1.38729e-34	DsRed-8
Jun	1.33718e-36	1.37061	0.964	0.575	2.93631e-32	DsRed-8
Apbb1ip	0	1.36075	0.94	0.018	0	DsRed-8
Cd300c2	0	1.35207	0.916	0.012	0	DsRed-8
Atf3	1.50665e-203	1.34983	0.699	0.034	3.30845e-199	DsRed-8
Zfp36l2	6.74444e-123	1.34824	0.904	0.114	1.48101e-118	DsRed-8
Zfp36	2.25036e-284	1.34377	0.831	0.033	4.94156e-280	DsRed-8
Gas6	6.40009e-65	1.34265	0.904	0.264	1.4054e-60	DsRed-8
P2ry13	0	1.34054	0.855	0.009	0	DsRed-8
Lyn	0	1.33789	0.928	0.035	0	DsRed-8
Rhob	3.05399e-37	1.3299	0.964	0.789	6.70627e-33	DsRed-8
Ptgs1	0	1.32595	0.904	0.016	0	DsRed-8
Arhgdib	0	1.3258	0.892	0.03	0	DsRed-8
Efhd2	6.58562e-59	1.32565	0.964	0.365	1.44614e-54	DsRed-8
F11r	0	1.32011	0.88	0.016	0	DsRed-8
Mafb	3.9869e-142	1.3198	0.88	0.09	8.75484e-138	DsRed-8
Ier5	3.97347e-48	1.31441	0.855	0.309	8.72535e-44	DsRed-8
Irf8	0	1.28649	0.904	0.016	0	DsRed-8
Rnf130	1.85378e-73	1.28509	0.952	0.269	4.07071e-69	DsRed-8
Adgre1	7.88174e-188	1.28431	0.94	0.076	1.73075e-183	DsRed-8
Clic1	1.88309e-49	1.27813	0.976	0.399	4.13507e-45	DsRed-8
Ighm	0	1.27718	0.88	0.009	0	DsRed-8
Cmtm6	1.25736e-167	1.2723	0.916	0.081	2.76103e-163	DsRed-8
Lst1	1.61696e-111	1.27211	0.867	0.12	3.55067e-107	DsRed-8
Ccr5	0	1.27139	0.759	0.01	0	DsRed-8
Epb41l2	3.4138e-69	1.27019	0.964	0.283	7.49637e-65	DsRed-8
Bin2	0	1.26696	0.843	0.015	0	DsRed-8
Plxdc2	8.45519e-70	1.26444	0.904	0.221	1.85667e-65	DsRed-8
Lair1	0	1.24675	0.88	0.018	0	DsRed-8
Mpeg1	0	1.2374	0.819	0.01	0	DsRed-8
Pmepa1	2.61112e-60	1.23209	0.855	0.226	5.73376e-56	DsRed-8
Lamp1	8.33445e-47	1.22307	0.988	0.915	1.83016e-42	DsRed-8
Rac2	0	1.21632	0.855	0.012	0	DsRed-8
Bcl2a1b	0	1.21296	0.807	0.008	0	DsRed-8
Cfh	0	1.20563	0.904	0.019	0	DsRed-8
Cmtm7	2.15745e-154	1.2056	0.916	0.09	4.73755e-150	DsRed-8
Klf2	4.20968e-79	1.19872	0.651	0.086	9.24403e-75	DsRed-8
Icam1	0	1.19376	0.783	0.013	0	DsRed-8
Abhd12	2.5348e-46	1.19156	0.976	0.542	5.56618e-42	DsRed-8
Itgam	0	1.18726	0.855	0.01	0	DsRed-8
Vamp8	5.65798e-307	1.18722	0.904	0.036	1.24244e-302	DsRed-8
Pycard	1.63055e-85	1.18701	0.904	0.174	3.58052e-81	DsRed-8
Slco2b1	0	1.17929	0.855	0.015	0	DsRed-8
Ecscr	2.38119e-260	1.17739	0.783	0.032	5.22884e-256	DsRed-8
Coro1a	1.03299e-40	1.17692	0.988	0.592	2.26835e-36	DsRed-8
Mbnl1	7.32144e-59	1.1714	0.94	0.308	1.60772e-54	DsRed-8
H2-D1	2.34806e-55	1.16279	0.964	0.377	5.15611e-51	DsRed-8
Npc2	5.13832e-42	1.16273	0.988	0.833	1.12832e-37	DsRed-8
Mcl1	7.39995e-34	1.15091	0.928	0.612	1.62495e-29	DsRed-8
Lmo2	4.40818e-94	1.148	0.916	0.158	9.67992e-90	DsRed-8
Cryba4	0	1.145	0.831	0.008	0	DsRed-8
Ptpn6	0	1.14297	0.916	0.012	0	DsRed-8
H2-K1	6.33061e-264	1.13954	0.904	0.044	1.39014e-259	DsRed-8
Tnfaip8l2	0	1.13546	0.892	0.008	0	DsRed-8
Capza2	3.33681e-42	1.12911	1	0.896	7.3273e-38	DsRed-8
Ostf1	1.88828e-64	1.12648	0.94	0.289	4.14648e-60	DsRed-8
Tnf	6.72797e-269	1.12429	0.506	0.01	1.4774e-264	DsRed-8
Rab3il1	4.33297e-104	1.11758	0.928	0.145	9.51478e-100	DsRed-8
Ubc	7.00473e-32	1.1151	1	0.953	1.53817e-27	DsRed-8
Psap	9.77503e-45	1.11295	1	0.883	2.1465e-40	DsRed-8
Fth1	1.16427e-39	1.10683	1	0.998	2.55663e-35	DsRed-8
Scamp2	4.73223e-58	1.10649	0.855	0.239	1.03915e-53	DsRed-8
Rrbp1	1.57417e-51	1.101	0.952	0.385	3.45672e-47	DsRed-8
Ckb	8.24119e-33	1.09687	1	0.93	1.80968e-28	DsRed-8
Ctsh	0	1.08883	0.795	0.014	0	DsRed-8
Gusb	2.56971e-52	1.08523	0.904	0.327	5.64283e-48	DsRed-8
Zeb2	8.96363e-137	1.08162	0.831	0.079	1.96832e-132	DsRed-8
Neat1	1.84645e-100	1.07927	0.783	0.101	4.05462e-96	DsRed-8
Fcgr1	0	1.06805	0.831	0.008	0	DsRed-8
Fcgrt	0	1.05996	0.795	0.024	0	DsRed-8
Creg1	3.0593e-79	1.05254	0.867	0.172	6.71792e-75	DsRed-8
Ppp1r15a	3.08002e-40	1.04267	0.831	0.302	6.76341e-36	DsRed-8
Tmem86a	9.95646e-102	1.0344	0.819	0.111	2.18634e-97	DsRed-8
Fermt3	0	1.03407	0.892	0.014	0	DsRed-8
Pde3b	5.36993e-87	1.03027	0.88	0.159	1.17918e-82	DsRed-8
Lamp2	3.12789e-58	1.02802	0.928	0.298	6.86853e-54	DsRed-8
Fyb	2.44099e-260	1.02789	0.892	0.044	5.36016e-256	DsRed-8
Bmp2k	1.00041e-78	1.02628	0.867	0.173	2.19681e-74	DsRed-8
Lcp1	0	1.02413	0.843	0.016	0	DsRed-8
Dusp2	3.05775e-110	1.02353	0.651	0.059	6.71451e-106	DsRed-8
Cxcl2	2.89119e-41	1.02139	0.181	0.011	6.34877e-37	DsRed-8
Cebpb	4.93919e-88	1.01243	0.843	0.143	1.0846e-83	DsRed-8
Nfe2l2	8.30844e-171	1.00888	0.819	0.06	1.82445e-166	DsRed-8
Cd52	0	1.00815	0.747	0.009	0	DsRed-8
Wasf2	7.24923e-90	1.00484	0.867	0.143	1.59186e-85	DsRed-8
Ctsc	0	1.00078	0.735	0.016	0	DsRed-8
Srgap2	8.04394e-46	0.994621	0.892	0.345	1.76637e-41	DsRed-8
Sgk1	3.33779e-28	0.992757	0.735	0.284	7.32946e-24	DsRed-8
Ppfia4	5.39133e-52	0.987495	0.855	0.265	1.18388e-47	DsRed-8
Fau	1.98009e-44	0.979767	1	1	4.34807e-40	DsRed-8
Arsb	6.22971e-68	0.976562	0.807	0.17	1.36798e-63	DsRed-8
Pf4	8.25804e-32	0.974294	0.133	0.008	1.81338e-27	DsRed-8
Zfp36l1	4.63554e-174	0.972601	0.783	0.051	1.01792e-169	DsRed-8
Sall1	0	0.966964	0.759	0.018	0	DsRed-8
Rps6ka1	1.17821e-94	0.966262	0.843	0.127	2.58723e-90	DsRed-8
Ntpcr	9.73495e-49	0.966188	0.867	0.308	2.1377e-44	DsRed-8
Gpx1	3.32988e-31	0.964616	0.976	0.843	7.31209e-27	DsRed-8
Pdlim4	2.06763e-221	0.964423	0.88	0.051	4.54031e-217	DsRed-8
Gmfg	0	0.963532	0.795	0.02	0	DsRed-8
Fgd2	0	0.958933	0.819	0.024	0	DsRed-8
Ehd4	4.81595e-144	0.95628	0.831	0.078	1.05753e-139	DsRed-8
Ccl12	0	0.951517	0.614	0.009	0	DsRed-8
Tm6sf1	2.49711e-78	0.948571	0.843	0.162	5.48341e-74	DsRed-8
Sipa1	9.84873e-113	0.941091	0.904	0.121	2.16268e-108	DsRed-8
Serpine2	1.66338e-37	0.940352	0.88	0.339	3.65261e-33	DsRed-8
Hpgd	9.65211e-146	0.93919	0.711	0.052	2.11951e-141	DsRed-8
Lag3	2.49883e-70	0.936114	0.639	0.09	5.48717e-66	DsRed-8
Arhgap45	0	0.934204	0.759	0.014	0	DsRed-8
Asah1	2.02561e-44	0.931782	0.964	0.481	4.44803e-40	DsRed-8
Nckap1l	0	0.930868	0.783	0.008	0	DsRed-8
Ucp2	1.03679e-32	0.930165	0.94	0.512	2.27669e-28	DsRed-8
Rps20	5.52708e-41	0.927772	1	0.995	1.21369e-36	DsRed-8
Rps29	5.02163e-44	0.924215	1	0.999	1.1027e-39	DsRed-8
Mef2a	6.67634e-39	0.920646	0.94	0.444	1.46606e-34	DsRed-8
Rin2	5.70854e-63	0.919871	0.747	0.152	1.25354e-58	DsRed-8
Cd300a	0	0.919649	0.747	0.01	0	DsRed-8
Entpd1	0	0.919382	0.747	0.015	0	DsRed-8
Rpl30	1.42373e-39	0.905638	1	0.996	3.12637e-35	DsRed-8
P2ry6	0	0.905493	0.807	0.01	0	DsRed-8
Plekho1	9.48248e-41	0.905409	0.892	0.382	2.08226e-36	DsRed-8
Tagap	0	0.899374	0.542	0.006	0	DsRed-8
Syngr2	4.16196e-220	0.894689	0.771	0.038	9.13924e-216	DsRed-8
Picalm	1.98347e-41	0.894094	0.964	0.592	4.35551e-37	DsRed-8
Cd14	0	0.892701	0.699	0.006	0	DsRed-8
Stab1	1.73915e-151	0.88697	0.675	0.044	3.81899e-147	DsRed-8
Inpp5d	0	0.886392	0.831	0.008	0	DsRed-8
Clta	2.27221e-41	0.886015	1	0.988	4.98954e-37	DsRed-8
Tmbim6	2.96358e-39	0.884958	0.988	0.778	6.50773e-35	DsRed-8
Ly6e	2.55113e-34	0.884236	0.94	0.551	5.60202e-30	DsRed-8
Sft2d1	1.80125e-30	0.878596	0.916	0.606	3.95536e-26	DsRed-8
St3gal6	2.10619e-88	0.872716	0.675	0.081	4.62498e-84	DsRed-8
Cd37	0	0.869735	0.735	0.007	0	DsRed-8
Abca1	2.30709e-217	0.868078	0.771	0.038	5.06613e-213	DsRed-8
Ctsf	9.08861e-35	0.867275	0.783	0.293	1.99577e-30	DsRed-8
Cd86	0	0.866456	0.747	0.006	0	DsRed-8
Abi3	0	0.863308	0.735	0.005	0	DsRed-8
Cebpa	3.47053e-240	0.862886	0.687	0.026	7.62093e-236	DsRed-8
Cd83	5.78392e-45	0.860841	0.651	0.15	1.27009e-40	DsRed-8
Hk2	1.40078e-153	0.860826	0.723	0.051	3.07598e-149	DsRed-8
Hfe	0	0.854396	0.783	0.01	0	DsRed-8
Pros1	1.23744e-254	0.85435	0.783	0.032	2.71728e-250	DsRed-8
Necap2	3.81373e-67	0.852206	0.843	0.186	8.37457e-63	DsRed-8
Msn	2.65511e-63	0.851385	0.867	0.197	5.83036e-59	DsRed-8
Limd2	4.58272e-29	0.851233	0.976	0.774	1.00632e-24	DsRed-8
Rpl22	5.84851e-33	0.84469	0.976	0.974	1.28427e-28	DsRed-8
Litaf	1.48767e-135	0.844342	0.771	0.068	3.26677e-131	DsRed-8
Psmb8	0	0.837409	0.747	0.013	0	DsRed-8
Rnf13	5.96084e-36	0.834934	0.892	0.405	1.30894e-31	DsRed-8
Blvrb	1.68928e-64	0.834832	0.675	0.114	3.70948e-60	DsRed-8
Hes1	9.39897e-87	0.833848	0.518	0.045	2.06392e-82	DsRed-8
Pla2g15	2.27923e-70	0.832355	0.735	0.126	5.00497e-66	DsRed-8
Tgfbr1	1.41308e-29	0.830165	0.916	0.483	3.10297e-25	DsRed-8
Mylip	1.31969e-124	0.826615	0.723	0.066	2.8979e-120	DsRed-8
Rhoa	8.19068e-34	0.826195	0.988	0.874	1.79859e-29	DsRed-8
Cd63	7.31467e-18	0.825166	0.867	0.689	1.60623e-13	DsRed-8
Clec4a2	0	0.824807	0.771	0.006	0	DsRed-8
Tnfaip3	3.902e-172	0.822177	0.554	0.024	8.56841e-168	DsRed-8
Ppp1r18	1.34572e-61	0.817575	0.843	0.194	2.95507e-57	DsRed-8
Cd33	0	0.809341	0.759	0.008	0	DsRed-8
Tsc22d4	9.16044e-41	0.808773	0.867	0.321	2.01154e-36	DsRed-8
Tpst2	1.65821e-38	0.807139	0.855	0.355	3.64127e-34	DsRed-8
Srsf9	2.68894e-28	0.803618	0.916	0.6	5.90465e-24	DsRed-8
Susd3	0	0.800126	0.614	0.009	0	DsRed-8
Egr1	1.17011e-18	0.799945	0.675	0.318	2.56944e-14	DsRed-8
Gpsm3	1.40623e-144	0.798152	0.735	0.057	3.08795e-140	DsRed-8
Ppp1r10	2.47472e-22	0.794668	0.831	0.515	5.43423e-18	DsRed-8
Ncf1	1.34964e-284	0.79433	0.747	0.025	2.96366e-280	DsRed-8
Ncf2	0	0.793846	0.795	0.012	0	DsRed-8
Btg2	1.49121e-31	0.792631	0.723	0.231	3.27455e-27	DsRed-8
Pip4k2a	1.92524e-73	0.79094	0.771	0.133	4.22765e-69	DsRed-8
Mertk	0	0.790684	0.723	0.007	0	DsRed-8
Tlr2	0	0.790146	0.614	0.011	0	DsRed-8
Alox5ap	4.67252e-93	0.78916	0.711	0.085	1.02604e-88	DsRed-8
Skap2	5.67423e-147	0.788022	0.795	0.066	1.246e-142	DsRed-8
Slc11a1	0	0.787597	0.771	0.011	0	DsRed-8
Ninj1	9.80325e-56	0.784387	0.807	0.205	2.1527e-51	DsRed-8
Rhoh	5.69506e-242	0.783997	0.663	0.023	1.25058e-237	DsRed-8
Gnai2	1.61822e-32	0.783064	0.988	0.951	3.55344e-28	DsRed-8
Wnk1	5.29619e-29	0.782392	0.928	0.651	1.16299e-24	DsRed-8
Slc40a1	1.52657e-172	0.782277	0.651	0.034	3.35219e-168	DsRed-8
C3ar1	0	0.779973	0.747	0.007	0	DsRed-8
Tpp1	2.32759e-60	0.779704	0.819	0.184	5.11115e-56	DsRed-8
Akap13	5.88567e-44	0.777756	0.795	0.248	1.29243e-39	DsRed-8
Gna12	1.87699e-34	0.776832	0.904	0.449	4.12168e-30	DsRed-8
Daglb	9.85127e-49	0.776014	0.807	0.228	2.16324e-44	DsRed-8
Nrros	0	0.774337	0.723	0.02	0	DsRed-8
Dusp1	5.02798e-10	0.774133	0.723	0.559	1.10409e-05	DsRed-8
Pnrc1	1.05387e-16	0.77229	0.819	0.679	2.31419e-12	DsRed-8
Fos	5.6753e-14	0.77048	0.819	0.481	1.24624e-09	DsRed-8
Syngr1	9.96196e-27	0.767769	0.819	0.399	2.18755e-22	DsRed-8
Gna15	0	0.765944	0.639	0.008	0	DsRed-8
Sdcbp	1.20809e-28	0.763263	0.988	0.809	2.65285e-24	DsRed-8
Gatm	1.09423e-36	0.762992	0.711	0.216	2.40281e-32	DsRed-8
Rgs2	1.44318e-26	0.760123	0.892	0.476	3.16908e-22	DsRed-8
Rap1b	7.12165e-27	0.758775	0.94	0.847	1.56384e-22	DsRed-8
Camk1	4.50394e-29	0.755377	0.988	0.71	9.8902e-25	DsRed-8
Ms4a6b	0	0.753812	0.59	0.006	0	DsRed-8
Ints6l	4.94372e-37	0.752406	0.711	0.218	1.08559e-32	DsRed-8
Itga6	3.69955e-25	0.747133	0.747	0.315	8.12384e-21	DsRed-8
Gltp	2.87767e-49	0.745932	0.783	0.205	6.31908e-45	DsRed-8
Plek	4.22733e-171	0.745758	0.735	0.046	9.28279e-167	DsRed-8
Rps12	1.41451e-29	0.745234	0.988	0.993	3.10611e-25	DsRed-8
Nfkbid	4.36856e-158	0.744997	0.59	0.031	9.59292e-154	DsRed-8
Rcsd1	0	0.744698	0.675	0.016	0	DsRed-8
Sh3bgrl3	2.15407e-24	0.741826	0.964	0.913	4.73011e-20	DsRed-8
Rap1a	3.2431e-26	0.740273	0.928	0.706	7.12151e-22	DsRed-8
Tgfbr2	5.42306e-269	0.737429	0.627	0.017	1.19085e-264	DsRed-8
Slc16a6	8.13731e-215	0.736731	0.663	0.027	1.78687e-210	DsRed-8
Lrrc25	0	0.736523	0.759	0.008	0	DsRed-8
Hcls1	0	0.73439	0.735	0.011	0	DsRed-8
Lrp1	1.3419e-25	0.731485	0.892	0.56	2.94668e-21	DsRed-8
Zeb2os	6.75257e-268	0.729748	0.747	0.027	1.4828e-263	DsRed-8
Prkcd	1.01928e-47	0.72849	0.747	0.184	2.23823e-43	DsRed-8
Frmd4b	4.22167e-50	0.726881	0.687	0.14	9.27036e-46	DsRed-8
Eef1d	6.08135e-27	0.726534	0.976	0.759	1.3354e-22	DsRed-8
Twf2	2.99291e-27	0.723484	0.855	0.438	6.57213e-23	DsRed-8
Arhgap17	1.56499e-45	0.722512	0.759	0.201	3.43657e-41	DsRed-8
Jmjd1c	5.12741e-32	0.722369	0.855	0.375	1.12593e-27	DsRed-8
Slc3a2	5.14948e-26	0.722244	0.88	0.491	1.13077e-21	DsRed-8
Pold4	4.57035e-39	0.719266	0.855	0.321	1.0036e-34	DsRed-8
Blnk	0	0.719247	0.639	0.006	0	DsRed-8
Hck	8.59568e-235	0.71838	0.735	0.031	1.88753e-230	DsRed-8
Gns	8.25016e-34	0.716576	0.831	0.359	1.81165e-29	DsRed-8
Tnfrsf1a	1.93097e-228	0.71398	0.807	0.039	4.24022e-224	DsRed-8
Tcn2	1.37996e-103	0.713591	0.675	0.067	3.03026e-99	DsRed-8
Arhgap5	4.77382e-23	0.711712	0.867	0.527	1.04828e-18	DsRed-8
Gm42418	1.80082e-22	0.711547	0.976	0.577	3.95442e-18	DsRed-8
Vav1	0	0.709189	0.699	0.005	0	DsRed-8
Irf5	0	0.707238	0.735	0.008	0	DsRed-8
Casp8	0	0.705055	0.687	0.015	0	DsRed-8
Rps10	6.82352e-33	0.702514	1	0.997	1.49838e-28	DsRed-8
Socs3	3.31063e-29	0.699998	0.542	0.143	7.2698e-25	DsRed-8
Ikzf1	0	0.697871	0.699	0.013	0	DsRed-8
Snta1	3.19182e-51	0.690801	0.699	0.153	7.00891e-47	DsRed-8
Tnfrsf13b	0	0.690566	0.651	0.009	0	DsRed-8
Man1c1	7.49867e-126	0.688468	0.699	0.059	1.64663e-121	DsRed-8
Rhog	1.37952e-136	0.688151	0.723	0.057	3.0293e-132	DsRed-8
Plxnb2	1.81072e-28	0.687976	0.831	0.404	3.97616e-24	DsRed-8
Ptprc	0	0.687882	0.687	0.007	0	DsRed-8
Rpl35a	1.21178e-34	0.687802	1	0.999	2.66095e-30	DsRed-8
Rps11	3.93083e-30	0.685097	1	0.998	8.63171e-26	DsRed-8
Bst2	8.28128e-185	0.684919	0.687	0.036	1.81849e-180	DsRed-8
Il10rb	4.2681e-83	0.684488	0.687	0.09	9.37232e-79	DsRed-8
Rpl27a	1.19122e-36	0.681781	1	0.999	2.6158e-32	DsRed-8
Ftl1	1.13397e-12	0.681541	1	0.999	2.49008e-08	DsRed-8
Smap2	6.07238e-23	0.679844	0.904	0.615	1.33343e-18	DsRed-8
Cd84	0	0.677433	0.59	0.004	0	DsRed-8
Pmp22	1.0941e-53	0.676286	0.554	0.085	2.40254e-49	DsRed-8
Pon2	4.69444e-54	0.676111	0.723	0.149	1.03085e-49	DsRed-8
Myl12a	2.73842e-26	0.675223	0.759	0.345	6.0133e-22	DsRed-8
Rasgrp3	1.8225e-292	0.674249	0.554	0.011	4.00203e-288	DsRed-8
Sh3glb1	1.71673e-29	0.668724	0.988	0.853	3.76977e-25	DsRed-8
Lcp2	5.49634e-152	0.668101	0.663	0.042	1.20694e-147	DsRed-8
Asph	2.0638e-27	0.661951	0.831	0.397	4.5319e-23	DsRed-8
Il10ra	0	0.659542	0.578	0.004	0	DsRed-8
Snx18	3.25376e-33	0.659517	0.807	0.313	7.14494e-29	DsRed-8
Orai1	3.95456e-73	0.65951	0.663	0.093	8.68381e-69	DsRed-8
Tcirg1	3.84577e-120	0.658232	0.614	0.047	8.44493e-116	DsRed-8
Cttnbp2nl	4.4365e-21	0.658094	0.783	0.408	9.7421e-17	DsRed-8
Adgrg1	1.6203e-15	0.657844	0.867	0.639	3.55802e-11	DsRed-8
Dock10	3.24968e-50	0.65268	0.602	0.112	7.13597e-46	DsRed-8
Fli1	5.68225e-110	0.652552	0.639	0.054	1.24777e-105	DsRed-8
Sla	0	0.650984	0.602	0.008	0	DsRed-8
Gdf15	4.73808e-115	0.650836	0.277	0.008	1.04043e-110	DsRed-8
Hnrnpf	5.2289e-20	0.648679	0.964	0.882	1.14821e-15	DsRed-8
Lpl	2.73511e-78	0.648417	0.446	0.037	6.00604e-74	DsRed-8
Tgif1	1.03416e-236	0.642125	0.602	0.019	2.27091e-232	DsRed-8
Marcks	3.02204e-31	0.640623	1	0.997	6.63611e-27	DsRed-8
Mtdh	3.33903e-19	0.640525	0.952	0.812	7.33217e-15	DsRed-8
Lyl1	0	0.640302	0.651	0.011	0	DsRed-8
Adrb2	1.37378e-291	0.63991	0.53	0.01	3.01668e-287	DsRed-8
Ccl9	0	0.639525	0.494	0.005	0	DsRed-8
Hspa5	6.76156e-15	0.636492	0.952	0.81	1.48477e-10	DsRed-8
Cd180	0	0.636288	0.566	0.003	0	DsRed-8
Dusp6	1.51761e-47	0.636031	0.614	0.118	3.33253e-43	DsRed-8
Irf2bp2	1.00894e-22	0.634286	0.867	0.487	2.21552e-18	DsRed-8
Mrc1	2.79069e-201	0.632978	0.422	0.01	6.12807e-197	DsRed-8
Ms4a6d	0	0.632541	0.542	0.007	0	DsRed-8
Dock2	6.14663e-299	0.63208	0.614	0.014	1.34974e-294	DsRed-8
Il6ra	0	0.63145	0.663	0.01	0	DsRed-8
Rps4x	2.48194e-26	0.630174	1	0.998	5.4501e-22	DsRed-8
Slc2a5	3.53599e-153	0.63005	0.59	0.032	7.76469e-149	DsRed-8
Nfkb1	8.56596e-40	0.62928	0.699	0.192	1.881e-35	DsRed-8
Cd164	1.41924e-45	0.626302	0.771	0.204	3.11652e-41	DsRed-8
Actb	7.1822e-22	0.625698	1	0.999	1.57714e-17	DsRed-8
Slc25a45	1.09331e-239	0.62523	0.651	0.022	2.4008e-235	DsRed-8
Irf1	3.50035e-111	0.623326	0.566	0.043	7.68641e-107	DsRed-8
Timp2	2.79149e-18	0.62057	0.867	0.559	6.12984e-14	DsRed-8
Tmem176a	6.328e-21	0.620105	0.807	0.413	1.38957e-16	DsRed-8
Lgals9	5.1306e-276	0.61978	0.554	0.012	1.12663e-271	DsRed-8
Arhgap25	0	0.618625	0.542	0.005	0	DsRed-8
Tbxas1	0	0.61777	0.627	0.009	0	DsRed-8
Cxcl10	2.80005e-147	0.617391	0.313	0.007	6.14862e-143	DsRed-8
Rnaset2a	8.09095e-51	0.617281	0.675	0.137	1.77669e-46	DsRed-8
Fam212a	2.42573e-59	0.615171	0.602	0.093	5.32666e-55	DsRed-8
Runx1	2.57085e-273	0.613648	0.566	0.013	5.64533e-269	DsRed-8
Tifa	0	0.611171	0.494	0.007	0	DsRed-8
Rnaset2b	1.67486e-45	0.611019	0.627	0.134	3.67782e-41	DsRed-8
Cmtm3	1.22826e-82	0.60644	0.663	0.08	2.69714e-78	DsRed-8
Tpm3	8.25742e-21	0.605745	0.988	0.846	1.81325e-16	DsRed-8
Slc12a2	6.83792e-38	0.603708	0.699	0.2	1.50154e-33	DsRed-8
Golm1	1.31479e-30	0.60339	0.651	0.19	2.88715e-26	DsRed-8
Cflar	1.74754e-68	0.602809	0.723	0.119	3.83743e-64	DsRed-8
Ccl7	4.34049e-68	0.602069	0.241	0.011	9.53128e-64	DsRed-8
Numb	5.43604e-48	0.601616	0.566	0.103	1.1937e-43	DsRed-8
Slc7a8	5.45118e-58	0.601341	0.675	0.124	1.19702e-53	DsRed-8
Edem1	6.80408e-87	0.599175	0.687	0.084	1.49411e-82	DsRed-8
Rplp1	8.45093e-26	0.599009	1	0.998	1.85574e-21	DsRed-8
Ptafr	0	0.598989	0.639	0.01	0	DsRed-8
Tacc1	5.19305e-26	0.598275	0.795	0.355	1.14034e-21	DsRed-8
Clec4a3	0	0.597731	0.602	0.004	0	DsRed-8
Ldhb	5.25084e-16	0.597312	0.976	0.897	1.15303e-11	DsRed-8
0610040J01Rik	2.96506e-229	0.595699	0.602	0.02	6.51097e-225	DsRed-8
Il1a	0	0.595113	0.494	0.003	0	DsRed-8
Cap1	1.92949e-29	0.593644	0.795	0.334	4.23697e-25	DsRed-8
Fcgr2b	0	0.593597	0.494	0.005	0	DsRed-8
Ccnd1	6.3385e-87	0.59165	0.518	0.044	1.39187e-82	DsRed-8
Rps9	1.7054e-20	0.591272	1	0.998	3.74489e-16	DsRed-8
Tob2	8.88176e-32	0.590806	0.735	0.248	1.95035e-27	DsRed-8
Arhgap30	0	0.589605	0.699	0.006	0	DsRed-8
Khk	9.51189e-87	0.58885	0.711	0.09	2.08872e-82	DsRed-8
Rpsa	5.31292e-31	0.586204	1	0.999	1.16666e-26	DsRed-8
Fes	3.12359e-188	0.584931	0.639	0.029	6.85909e-184	DsRed-8
Nrip1	1.7091e-20	0.58488	0.711	0.306	3.75302e-16	DsRed-8
Tmed5	1.16151e-25	0.584719	0.771	0.331	2.55055e-21	DsRed-8
Ralb	1.00415e-21	0.584355	0.759	0.384	2.20502e-17	DsRed-8
Mgat4a	1.57082e-27	0.583303	0.566	0.164	3.44937e-23	DsRed-8
Rps3a1	1.74938e-23	0.581283	1	0.998	3.84146e-19	DsRed-8
Snx2	1.0826e-15	0.580141	0.771	0.527	2.37727e-11	DsRed-8
Klf3	3.56931e-50	0.579199	0.675	0.13	7.83785e-46	DsRed-8
Myo1f	0	0.578574	0.566	0.006	0	DsRed-8
Bhlhe41	2.45376e-36	0.577991	0.566	0.133	5.38821e-32	DsRed-8
Cib1	7.80773e-42	0.577222	0.699	0.177	1.7145e-37	DsRed-8
Tmem243	1.24095e-48	0.576748	0.735	0.158	2.72499e-44	DsRed-8
Gem	6.70634e-18	0.576613	0.578	0.211	1.47265e-13	DsRed-8
Fchsd2	9.11453e-21	0.575494	0.819	0.498	2.00146e-16	DsRed-8
Prex1	5.47603e-69	0.574803	0.687	0.104	1.20248e-64	DsRed-8
Dennd4a	4.87967e-33	0.574462	0.675	0.212	1.07153e-28	DsRed-8
Slc29a3	1.60055e-71	0.572575	0.651	0.09	3.51464e-67	DsRed-8
Smagp	0	0.572028	0.578	0.007	0	DsRed-8
Ssh2	5.25419e-17	0.571821	0.771	0.489	1.15377e-12	DsRed-8
Fam49b	7.23719e-18	0.57066	0.952	0.871	1.58921e-13	DsRed-8
Ier2	2.36324e-15	0.570538	0.675	0.328	5.18944e-11	DsRed-8
Arpc4	5.084e-21	0.569267	0.964	0.82	1.11639e-16	DsRed-8
Nek7	8.6302e-44	0.56644	0.699	0.168	1.89511e-39	DsRed-8
Hsp90b1	1.04621e-19	0.565922	0.964	0.818	2.29737e-15	DsRed-8
Nfic	8.93762e-35	0.565097	0.663	0.186	1.96261e-30	DsRed-8
Gm2a	1.49198e-30	0.561914	0.639	0.192	3.27624e-26	DsRed-8
Fmnl3	8.98806e-158	0.561116	0.59	0.03	1.97369e-153	DsRed-8
Commd8	3.2832e-16	0.557993	0.892	0.651	7.20957e-12	DsRed-8
Arrb2	1.5069e-19	0.557983	0.795	0.443	3.30901e-15	DsRed-8
Dhrs3	0	0.557027	0.602	0.012	0	DsRed-8
Gmpr	5.3022e-29	0.554796	0.699	0.251	1.16431e-24	DsRed-8
Cd302	1.67561e-67	0.55399	0.639	0.093	3.67948e-63	DsRed-8
Rps24	7.25423e-29	0.55393	1	0.999	1.59296e-24	DsRed-8
Dnase2a	1.53258e-215	0.552912	0.542	0.016	3.36539e-211	DsRed-8
Phgdh	1.90604e-44	0.549119	0.518	0.088	4.18547e-40	DsRed-8
Krcc1	1.29514e-24	0.548273	0.735	0.311	2.84401e-20	DsRed-8
Ctc1	7.07879e-23	0.547999	0.711	0.312	1.55443e-18	DsRed-8
Tpt1	1.43924e-21	0.54752	1	0.999	3.16044e-17	DsRed-8
Smox	6.97538e-31	0.547263	0.687	0.215	1.53172e-26	DsRed-8
Stard3	5.35043e-21	0.546608	0.675	0.283	1.1749e-16	DsRed-8
Slc29a1	2.32553e-61	0.545651	0.602	0.091	5.10663e-57	DsRed-8
Rplp0	1.6049e-24	0.544175	1	0.998	3.52419e-20	DsRed-8
Mpc1	6.62726e-16	0.544129	0.94	0.786	1.45528e-11	DsRed-8
Sec11c	1.06464e-16	0.54294	0.843	0.575	2.33784e-12	DsRed-8
Srgn	2.07831e-147	0.542376	0.434	0.016	4.56376e-143	DsRed-8
Pkn1	1.66896e-20	0.541737	0.783	0.421	3.66486e-16	DsRed-8
Igfbp4	9.21779e-17	0.540749	0.675	0.304	2.02413e-12	DsRed-8
Gtf2h2	1.38986e-25	0.540055	0.735	0.294	3.05198e-21	DsRed-8
Cryl1	1.37633e-57	0.539042	0.53	0.074	3.02228e-53	DsRed-8
Grk2	2.53552e-21	0.538943	0.795	0.448	5.56776e-17	DsRed-8
Nav3	2.40952e-12	0.537415	0.795	0.524	5.29105e-08	DsRed-8
Elmo1	6.04239e-17	0.536047	0.867	0.502	1.32685e-12	DsRed-8
Ptbp1	3.91487e-24	0.53583	0.759	0.316	8.59667e-20	DsRed-8
Adam15	5.25065e-25	0.533327	0.663	0.249	1.15299e-20	DsRed-8
Gpr84	3.21309e-277	0.533103	0.47	0.007	7.05562e-273	DsRed-8
Tpd52	1.11642e-19	0.532836	0.831	0.507	2.45155e-15	DsRed-8
Elf1	1.67824e-42	0.531883	0.518	0.093	3.68526e-38	DsRed-8
Igf1	3.21134e-36	0.531168	0.301	0.036	7.05178e-32	DsRed-8
S100a13	4.7296e-89	0.529758	0.542	0.049	1.03857e-84	DsRed-8
Prcp	3.11365e-25	0.526981	0.675	0.244	6.83727e-21	DsRed-8
Rps21	1.52679e-25	0.526479	1	0.997	3.35268e-21	DsRed-8
Adap2	8.20704e-300	0.525679	0.41	0.004	1.80218e-295	DsRed-8
Glmp	9.44982e-28	0.52472	0.675	0.231	2.07509e-23	DsRed-8
Sdf2l1	2.41943e-13	0.524476	0.627	0.313	5.31283e-09	DsRed-8
Pdgfb	3.35212e-35	0.521754	0.554	0.129	7.36093e-31	DsRed-8
Pacsin2	2.28385e-25	0.521695	0.663	0.243	5.01511e-21	DsRed-8
Lap3	4.5782e-22	0.519241	0.735	0.341	1.00533e-17	DsRed-8
Dapp1	2.09028e-236	0.518985	0.53	0.013	4.59005e-232	DsRed-8
Pfn1	2.27205e-14	0.518158	1	0.987	4.98919e-10	DsRed-8
Arhgap31	1.18341e-79	0.517826	0.59	0.065	2.59866e-75	DsRed-8
Ptbp3	1.90198e-20	0.51691	0.711	0.307	4.17656e-16	DsRed-8
Vasp	2.98002e-15	0.516898	0.783	0.499	6.54382e-11	DsRed-8
Mcfd2	5.03925e-18	0.515897	0.747	0.379	1.10657e-13	DsRed-8
Idh2	9.27995e-14	0.515658	0.88	0.693	2.03778e-09	DsRed-8
1700017B05Rik	7.47123e-142	0.514681	0.59	0.034	1.64061e-137	DsRed-8
Rel	1.74348e-190	0.51374	0.542	0.02	3.82852e-186	DsRed-8
Nagpa	2.80486e-89	0.512887	0.554	0.051	6.1592e-85	DsRed-8
Erp29	6.89529e-20	0.512804	1	0.943	1.51414e-15	DsRed-8
Rpl10a	2.43911e-21	0.512313	0.988	0.996	5.35604e-17	DsRed-8
Rnh1	6.01751e-20	0.508487	0.783	0.433	1.32139e-15	DsRed-8
Herpud1	9.64328e-21	0.508471	0.819	0.42	2.11757e-16	DsRed-8
Dab2	1.43091e-65	0.508255	0.373	0.029	3.14214e-61	DsRed-8
Tor1aip1	1.03412e-25	0.507574	0.614	0.199	2.27082e-21	DsRed-8
Tapbp	6.50743e-28	0.507325	0.566	0.165	1.42897e-23	DsRed-8
Csf3r	0	0.506927	0.518	0.008	0	DsRed-8
Plod1	4.79741e-113	0.504946	0.518	0.034	1.05346e-108	DsRed-8
Rpl39	5.51804e-24	0.50371	1	0.997	1.21171e-19	DsRed-8
Ubl3	2.52464e-17	0.503375	0.892	0.634	5.54385e-13	DsRed-8
Slc12a9	3.43656e-18	0.502342	0.614	0.254	7.54634e-14	DsRed-8
St6galnac4	5.32214e-34	0.500438	0.711	0.219	1.16869e-29	DsRed-8
Card19	3.13477e-27	0.500137	0.735	0.278	6.88363e-23	DsRed-8
Nfam1	3.39455e-121	0.499666	0.482	0.026	7.45409e-117	DsRed-8
Tmem55b	4.07966e-10	0.499005	0.831	0.638	8.95853e-06	DsRed-8
Usp2	2.48518e-75	0.498529	0.578	0.067	5.4572e-71	DsRed-8
Fam46a	2.17782e-15	0.497926	0.639	0.29	4.78229e-11	DsRed-8
Ski	3.15288e-21	0.497789	0.759	0.383	6.92342e-17	DsRed-8
Rpl18a	6.83105e-18	0.497676	1	0.999	1.50003e-13	DsRed-8
Nmt1	4.23178e-20	0.497414	0.843	0.515	9.29256e-16	DsRed-8
Gpr183	6.67626e-287	0.49557	0.422	0.005	1.46604e-282	DsRed-8
Adam17	2.43716e-54	0.494666	0.602	0.099	5.35176e-50	DsRed-8
Klf6	4.49125e-13	0.493462	0.855	0.655	9.86233e-09	DsRed-8
Rps27a	1.15166e-26	0.493425	1	0.999	2.52894e-22	DsRed-8
Bach1	1.11379e-31	0.493063	0.711	0.218	2.44577e-27	DsRed-8
Lacc1	3.62683e-228	0.492465	0.554	0.016	7.96416e-224	DsRed-8
Lpcat3	4.65031e-33	0.491701	0.627	0.164	1.02116e-28	DsRed-8
Cltc	5.60678e-18	0.491307	0.928	0.774	1.23119e-13	DsRed-8
Gbp7	5.04845e-173	0.491081	0.398	0.01	1.10859e-168	DsRed-8
Ramp1	5.98702e-118	0.491077	0.458	0.024	1.31469e-113	DsRed-8
Hprt	5.30872e-18	0.490788	0.88	0.614	1.16574e-13	DsRed-8
Xlr	5.00793e-261	0.489864	0.446	0.007	1.09969e-256	DsRed-8
Acox3	3.19397e-33	0.489	0.566	0.133	7.01364e-29	DsRed-8
Atox1	2.52104e-16	0.488849	0.94	0.871	5.53594e-12	DsRed-8
Prdx1	8.9927e-09	0.48777	0.964	0.908	0.000197471	DsRed-8
Itm2c	4.37793e-12	0.487345	0.976	0.809	9.61349e-08	DsRed-8
Adcy7	6.04659e-88	0.487109	0.518	0.045	1.32777e-83	DsRed-8
Ifnar2	3.941e-45	0.486081	0.663	0.148	8.65404e-41	DsRed-8
Tex261	2.34283e-14	0.485843	0.783	0.458	5.14461e-10	DsRed-8
Dip2b	1.84402e-17	0.48459	0.723	0.392	4.04929e-13	DsRed-8
Mapkapk2	4.8865e-22	0.48412	0.639	0.244	1.07303e-17	DsRed-8
Tifab	0	0.483384	0.494	0.002	0	DsRed-8
Sh3bp1	1.13116e-183	0.480109	0.482	0.015	2.48393e-179	DsRed-8
Pabpc1	3.50908e-12	0.480044	0.928	0.952	7.70558e-08	DsRed-8
Myh9	1.28789e-66	0.480035	0.59	0.078	2.82807e-62	DsRed-8
Lims1	4.8892e-19	0.479387	0.807	0.461	1.07362e-14	DsRed-8
Parvg	1.74897e-291	0.478556	0.482	0.007	3.84056e-287	DsRed-8
Renbp	3.88468e-179	0.478473	0.542	0.021	8.53036e-175	DsRed-8
Skil	1.16543e-13	0.478331	0.795	0.562	2.55916e-09	DsRed-8
Fez2	3.48145e-17	0.475834	0.807	0.458	7.64491e-13	DsRed-8
Rsu1	3.71277e-20	0.475695	0.711	0.354	8.15288e-16	DsRed-8
Pnpla7	1.77113e-156	0.475636	0.506	0.021	3.88922e-152	DsRed-8
B4galt1	4.7703e-110	0.472866	0.566	0.042	1.04751e-105	DsRed-8
Comt	6.27689e-15	0.47268	0.928	0.769	1.37834e-10	DsRed-8
Rasal3	6.76997e-291	0.471756	0.434	0.005	1.48662e-286	DsRed-8
Pttg1ip	2.56236e-20	0.470255	0.699	0.317	5.62668e-16	DsRed-8
Hspa1a	1.54563e-09	0.469987	0.337	0.133	3.39405e-05	DsRed-8
Cdk6	1.52807e-157	0.468506	0.518	0.022	3.35548e-153	DsRed-8
Cndp2	2.33383e-15	0.468386	0.663	0.352	5.12485e-11	DsRed-8
Cln8	1.63365e-22	0.466926	0.639	0.243	3.58734e-18	DsRed-8
Cnpy3	8.85788e-17	0.46426	0.723	0.382	1.9451e-12	DsRed-8
Adora3	0	0.463964	0.446	0.004	0	DsRed-8
Ivns1abp	2.68623e-08	0.463769	0.892	0.767	0.000589869	DsRed-8
Emp3	3.21989e-26	0.463709	0.373	0.072	7.07056e-22	DsRed-8
Acads	5.89972e-16	0.463465	0.651	0.313	1.29552e-11	DsRed-8
Tns3	1.00355e-43	0.462464	0.47	0.074	2.2037e-39	DsRed-8
Colgalt1	2.60603e-16	0.46147	0.759	0.452	5.72257e-12	DsRed-8
Tmed3	1.69074e-14	0.460655	0.807	0.522	3.71269e-10	DsRed-8
Gngt2	3.28423e-156	0.460504	0.542	0.025	7.21185e-152	DsRed-8
Hk3	5.14454e-152	0.460297	0.53	0.025	1.12969e-147	DsRed-8
Gm26532	2.1635e-120	0.459988	0.349	0.013	4.75084e-116	DsRed-8
Map3k8	0	0.457288	0.458	0.005	0	DsRed-8
Dock8	0	0.455391	0.506	0.007	0	DsRed-8
Plin2	6.10049e-08	0.455384	0.506	0.289	0.00133961	DsRed-8
Dazap2	1.17613e-16	0.455123	0.843	0.5	2.58265e-12	DsRed-8
Rab20	0	0.454851	0.53	0.005	0	DsRed-8
Gsdmd	3.28054e-224	0.453991	0.53	0.015	7.20375e-220	DsRed-8
Tmem176b	1.45501e-08	0.453732	0.904	0.739	0.000319505	DsRed-8
Lipa	9.0267e-28	0.453056	0.614	0.189	1.98217e-23	DsRed-8
Apobec3	3.33986e-201	0.45277	0.446	0.011	7.33399e-197	DsRed-8
Ssr4	9.84284e-15	0.452472	0.952	0.838	2.16139e-10	DsRed-8
Cebpd	5.99723e-56	0.452417	0.506	0.066	1.31693e-51	DsRed-8
Sash3	0	0.451663	0.458	0.003	0	DsRed-8
Gnpda1	4.75579e-19	0.451663	0.53	0.19	1.04432e-14	DsRed-8
Rcbtb2	2.92622e-12	0.451612	0.723	0.448	6.42569e-08	DsRed-8
Ang	6.06596e-168	0.451376	0.53	0.022	1.33202e-163	DsRed-8
Ptp4a3	4.912e-10	0.451277	0.735	0.513	1.07863e-05	DsRed-8
Scarb2	8.20514e-14	0.451238	0.843	0.582	1.80177e-09	DsRed-8
Osgep	1.79898e-13	0.450572	0.807	0.519	3.95038e-09	DsRed-8
Hhex	0	0.449618	0.494	0.006	0	DsRed-8
Mob1a	1.86465e-46	0.449239	0.614	0.119	4.09458e-42	DsRed-8
Snx17	5.04445e-12	0.449087	0.88	0.717	1.10771e-07	DsRed-8
Rpl23	3.80731e-25	0.448851	1	0.999	8.36048e-21	DsRed-8
Acap2	9.68607e-41	0.44881	0.651	0.152	2.12696e-36	DsRed-8
Rassf2	3.26577e-37	0.447727	0.53	0.105	7.17131e-33	DsRed-8
Tap2	9.31749e-192	0.446947	0.494	0.015	2.04603e-187	DsRed-8
Pld1	2.12357e-190	0.446801	0.422	0.01	4.66315e-186	DsRed-8
Smad7	1.43297e-21	0.446463	0.542	0.176	3.14666e-17	DsRed-8
Wdr1	1.51418e-14	0.44578	0.867	0.669	3.32499e-10	DsRed-8
Kcnk13	9.96823e-34	0.445638	0.554	0.129	2.18892e-29	DsRed-8
Abracl	2.38098e-13	0.445458	0.807	0.488	5.22839e-09	DsRed-8
Fuca1	4.00551e-14	0.445278	0.687	0.411	8.7957e-10	DsRed-8
Ms4a6c	0	0.444265	0.446	0.004	0	DsRed-8
Il6st	6.19621e-21	0.444117	0.542	0.186	1.36062e-16	DsRed-8
Tubgcp5	7.50536e-19	0.443037	0.578	0.221	1.6481e-14	DsRed-8
Arap1	1.75336e-85	0.4426	0.542	0.05	3.8502e-81	DsRed-8
Tnfaip8	4.70073e-116	0.44253	0.506	0.03	1.03223e-111	DsRed-8
Rtn4rl1	2.30802e-31	0.442477	0.554	0.135	5.06817e-27	DsRed-8
Rassf4	1.25755e-75	0.44222	0.53	0.054	2.76145e-71	DsRed-8
Dnm2	2.66645e-19	0.44216	0.735	0.364	5.85525e-15	DsRed-8
Rpl21	4.26973e-18	0.441594	1	0.998	9.3759e-14	DsRed-8
Rasa4	6.70278e-30	0.441442	0.602	0.17	1.47186e-25	DsRed-8
Dcxr	6.01769e-56	0.441222	0.446	0.052	1.32142e-51	DsRed-8
Man1a2	3.1354e-12	0.440714	0.759	0.496	6.88503e-08	DsRed-8
Sdc4	1.49477e-159	0.43951	0.41	0.013	3.28237e-155	DsRed-8
Elk3	1.8414e-134	0.439079	0.494	0.024	4.04352e-130	DsRed-8
Ccl6	0	0.438596	0.349	0.002	0	DsRed-8
Fam102b	6.69053e-16	0.438113	0.723	0.388	1.46917e-11	DsRed-8
Frmd4a	1.54681e-08	0.436183	0.819	0.605	0.000339664	DsRed-8
Zfp710	1.68185e-26	0.43577	0.639	0.204	3.69317e-22	DsRed-8
Rpl13	3.45852e-20	0.434676	1	0.999	7.59456e-16	DsRed-8
Abca9	9.09483e-229	0.434381	0.446	0.009	1.99713e-224	DsRed-8
Gna13	1.57073e-11	0.434333	0.675	0.432	3.44916e-07	DsRed-8
Tram1	3.16992e-14	0.433879	0.663	0.372	6.96083e-10	DsRed-8
Hps3	4.4265e-40	0.432569	0.518	0.095	9.72015e-36	DsRed-8
Mgat1	9.54833e-15	0.430202	0.639	0.336	2.09672e-10	DsRed-8
Nek6	6.56267e-29	0.429637	0.53	0.137	1.4411e-24	DsRed-8
Sh2b3	1.19866e-59	0.429518	0.614	0.091	2.63214e-55	DsRed-8
Ncoa4	5.11684e-15	0.429429	0.795	0.48	1.12361e-10	DsRed-8
Fbxw4	1.69641e-19	0.429421	0.578	0.223	3.72514e-15	DsRed-8
Slfn2	2.72279e-220	0.427803	0.349	0.005	5.97898e-216	DsRed-8
Morc3	1.15478e-18	0.427568	0.663	0.295	2.53579e-14	DsRed-8
Tm9sf3	1.57509e-12	0.427405	0.88	0.709	3.45874e-08	DsRed-8
Reep3	2.99134e-16	0.426578	0.627	0.266	6.56868e-12	DsRed-8
Rp2	2.4575e-44	0.426228	0.578	0.109	5.39642e-40	DsRed-8
Atp6v0e	3.71482e-13	0.425831	0.783	0.478	8.15736e-09	DsRed-8
Snx3	5.67255e-13	0.425456	0.904	0.835	1.24564e-08	DsRed-8
Rpl19	3.13059e-24	0.4253	1	0.999	6.87447e-20	DsRed-8
Cdk9	8.65177e-14	0.425297	0.795	0.511	1.89984e-09	DsRed-8
Crlf3	1.2443e-21	0.423838	0.578	0.195	2.73237e-17	DsRed-8
Mknk1	1.45201e-33	0.422218	0.578	0.14	3.18847e-29	DsRed-8
Sft2d2	2.30193e-60	0.421888	0.53	0.071	5.0548e-56	DsRed-8
Sqor	9.08763e-230	0.421712	0.47	0.01	1.99555e-225	DsRed-8
Gdi2	9.36259e-15	0.421628	0.976	0.96	2.05593e-10	DsRed-8
BC035044	0	0.421558	0.446	0.004	0	DsRed-8
Capzb	1.31315e-12	0.421067	0.976	0.926	2.88356e-08	DsRed-8
mt-Co2	1.3279e-12	0.420705	1	1	2.91594e-08	DsRed-8
A630001G21Rik	0	0.420242	0.446	0.004	0	DsRed-8
Lrp10	7.92541e-18	0.420155	0.614	0.249	1.74034e-13	DsRed-8
Nfia	1.07175e-30	0.420094	0.518	0.112	2.35345e-26	DsRed-8
Samsn1	0	0.419923	0.482	0.004	0	DsRed-8
Lamtor1	3.98711e-11	0.419642	0.916	0.815	8.75529e-07	DsRed-8
Col27a1	2.82445e-113	0.419444	0.373	0.016	6.2022e-109	DsRed-8
Csrnp1	1.60673e-59	0.419357	0.434	0.046	3.52822e-55	DsRed-8
Aim2	1.10537e-94	0.418506	0.554	0.047	2.42727e-90	DsRed-8
Gng12	5.20605e-46	0.418317	0.554	0.097	1.1432e-41	DsRed-8
Uap1l1	7.9257e-78	0.417706	0.458	0.039	1.7404e-73	DsRed-8
P2rx7	1.94134e-287	0.41342	0.47	0.007	4.26299e-283	DsRed-8
Slc7a7	8.64384e-65	0.413111	0.386	0.033	1.8981e-60	DsRed-8
Hmgb2	2.29606e-06	0.413078	0.614	0.406	0.0504193	DsRed-8
Itgb2	0	0.41235	0.482	0.003	0	DsRed-8
Git2	1.52383e-12	0.412051	0.651	0.333	3.34619e-08	DsRed-8
Ppp1r12c	1.21446e-16	0.411851	0.675	0.333	2.66683e-12	DsRed-8
Mfng	3.86581e-38	0.411702	0.47	0.079	8.48894e-34	DsRed-8
Akr1b10	2.83204e-166	0.41125	0.506	0.02	6.21888e-162	DsRed-8
Plcl2	7.60447e-28	0.411097	0.59	0.175	1.66987e-23	DsRed-8
Gng5	1.68867e-12	0.410648	1	0.889	3.70816e-08	DsRed-8
Rap1gds1	2.47546e-14	0.410519	0.747	0.429	5.43586e-10	DsRed-8
Vps18	2.77916e-28	0.410148	0.602	0.171	6.10275e-24	DsRed-8
Fmnl1	5.98761e-45	0.40949	0.506	0.083	1.31482e-40	DsRed-8
Tnfrsf1b	2.19497e-198	0.408111	0.47	0.013	4.81993e-194	DsRed-8
Tmem63a	5.09829e-270	0.408001	0.422	0.006	1.11953e-265	DsRed-8
Naaa	2.58902e-34	0.407738	0.482	0.099	5.68522e-30	DsRed-8
Arpc3	1.27492e-12	0.407017	0.964	0.925	2.79959e-08	DsRed-8
Foxn3	2.11972e-08	0.406994	0.855	0.674	0.000465469	DsRed-8
Snx6	1.64552e-12	0.406419	0.892	0.751	3.61339e-08	DsRed-8
Bcap31	1.16372e-14	0.406305	0.855	0.589	2.55542e-10	DsRed-8
Zbtb7a	1.53365e-10	0.404961	0.614	0.356	3.36774e-06	DsRed-8
Mob3c	3.21069e-66	0.40456	0.494	0.054	7.05036e-62	DsRed-8
Npc1	8.77107e-28	0.404462	0.602	0.176	1.92604e-23	DsRed-8
Senp2	2.65064e-14	0.404129	0.735	0.43	5.82053e-10	DsRed-8
Tlr7	0	0.403705	0.458	0.003	0	DsRed-8
Pald1	7.23454e-53	0.402643	0.482	0.064	1.58863e-48	DsRed-8
Tmem173	3.22265e-259	0.401614	0.398	0.005	7.07662e-255	DsRed-8
Clec5a	3.3822e-256	0.401523	0.361	0.004	7.42697e-252	DsRed-8
Rpl12	2.26611e-16	0.401213	1	0.986	4.97615e-12	DsRed-8
Nlrp3	3.41503e-275	0.401111	0.386	0.004	7.49905e-271	DsRed-8
Man1a	5.15248e-57	0.400901	0.506	0.065	1.13143e-52	DsRed-8
Nr3c1	6.49782e-21	0.40061	0.614	0.215	1.42686e-16	DsRed-8
Klf10	3.10723e-39	0.400354	0.494	0.088	6.82317e-35	DsRed-8
Ccnl1	1.56128e-08	0.399304	0.759	0.6	0.000342842	DsRed-8
Camk2d	1.82934e-11	0.399105	0.807	0.532	4.01705e-07	DsRed-8
Ptpn1	1.45654e-11	0.398724	0.916	0.715	3.19842e-07	DsRed-8
Il21r	0	0.398472	0.434	0.004	0	DsRed-8
Mknk2	1.73512e-14	0.395919	0.59	0.268	3.81014e-10	DsRed-8
Ophn1	3.22002e-11	0.395132	0.542	0.269	7.07084e-07	DsRed-8
Lpin2	9.35345e-14	0.395	0.663	0.333	2.05392e-09	DsRed-8
Kansl1l	5.1732e-25	0.394897	0.506	0.134	1.13598e-20	DsRed-8
Cdkn1a	2.24817e-09	0.394201	0.47	0.224	4.93677e-05	DsRed-8
Cd79b	8.70078e-293	0.393922	0.398	0.004	1.9106e-288	DsRed-8
Asb2	9.7684e-167	0.3939	0.373	0.009	2.14504e-162	DsRed-8
Mgll	1.31024e-19	0.392664	0.494	0.165	2.87716e-15	DsRed-8
Mfsd11	5.40518e-15	0.390921	0.723	0.386	1.18692e-10	DsRed-8
Atp6v0a2	4.83388e-21	0.390877	0.566	0.193	1.06147e-16	DsRed-8
Etfb	8.01509e-12	0.390699	0.819	0.623	1.76003e-07	DsRed-8
Acss1	2.42361e-90	0.390477	0.446	0.031	5.32201e-86	DsRed-8
Hexim1	1.59719e-10	0.390047	0.506	0.261	3.50727e-06	DsRed-8
Specc1	1.947e-24	0.389556	0.494	0.134	4.27541e-20	DsRed-8
Syk	1.39949e-227	0.389527	0.458	0.01	3.07314e-223	DsRed-8
Ncln	2.46537e-17	0.389228	0.675	0.32	5.41371e-13	DsRed-8
Rgl1	1.92528e-39	0.388923	0.446	0.074	4.22772e-35	DsRed-8
Tmem37	7.33091e-188	0.388689	0.422	0.011	1.60979e-183	DsRed-8
Itpr2	2.17559e-50	0.388037	0.361	0.038	4.77739e-46	DsRed-8
Tspo	1.14083e-46	0.387187	0.422	0.055	2.50514e-42	DsRed-8
Nrm	3.68842e-20	0.387061	0.47	0.14	8.0994e-16	DsRed-8
Rassf5	3.26171e-24	0.386367	0.458	0.12	7.16238e-20	DsRed-8
Apoc1	1.90108e-140	0.385774	0.253	0.004	4.17459e-136	DsRed-8
Pnpla2	6.26315e-31	0.385112	0.542	0.132	1.37533e-26	DsRed-8
Pdcd6ip	1.15116e-11	0.383249	0.663	0.387	2.52784e-07	DsRed-8
Nckap5l	7.32729e-17	0.383142	0.53	0.203	1.609e-12	DsRed-8
Lamtor4	2.28762e-11	0.382621	0.928	0.794	5.02339e-07	DsRed-8
Gmip	2.63279e-17	0.382076	0.663	0.293	5.78135e-13	DsRed-8
Slc39a1	1.39153e-19	0.381557	0.578	0.208	3.05567e-15	DsRed-8
Mcm3	5.14947e-94	0.38055	0.337	0.016	1.13077e-89	DsRed-8
Irf2	7.4957e-20	0.380308	0.554	0.196	1.64598e-15	DsRed-8
Tspan33	8.66508e-17	0.379008	0.518	0.193	1.90277e-12	DsRed-8
Ppcdc	2.32314e-15	0.378384	0.518	0.208	5.10139e-11	DsRed-8
Rps19	4.43693e-15	0.377676	1	0.998	9.74305e-11	DsRed-8
Slc6a6	1.51982e-09	0.377518	0.831	0.619	3.33738e-05	DsRed-8
Lactb	9.23097e-18	0.377466	0.554	0.209	2.02703e-13	DsRed-8
Adipor1	4.72692e-11	0.377407	0.843	0.669	1.03799e-06	DsRed-8
Abhd6	1.00186e-18	0.376892	0.566	0.219	2.19998e-14	DsRed-8
Cd2ap	1.24808e-15	0.376768	0.542	0.221	2.74066e-11	DsRed-8
Bcl10	3.04653e-14	0.376721	0.747	0.442	6.68988e-10	DsRed-8
Ppib	2.766e-14	0.375972	0.964	0.859	6.07386e-10	DsRed-8
Spint1	5.52563e-149	0.375404	0.361	0.01	1.21337e-144	DsRed-8
9930111J21Rik2	4.21738e-283	0.375109	0.337	0.002	9.26094e-279	DsRed-8
Cryzl2	5.38855e-51	0.374471	0.518	0.074	1.18327e-46	DsRed-8
Snap23	2.36055e-49	0.373743	0.566	0.094	5.18353e-45	DsRed-8
Il4ra	1.43382e-78	0.373499	0.41	0.03	3.14852e-74	DsRed-8
Wipf1	7.81751e-62	0.372486	0.47	0.052	1.71665e-57	DsRed-8
Gpr137b	2.44865e-21	0.371133	0.53	0.165	5.37699e-17	DsRed-8
Clk1	4.81888e-11	0.370577	0.867	0.653	1.05818e-06	DsRed-8
Nrp1	2.40806e-18	0.370301	0.59	0.219	5.28785e-14	DsRed-8
Nfkbiz	9.31719e-36	0.370061	0.386	0.06	2.04596e-31	DsRed-8
Traf3ip3	3.28951e-91	0.368983	0.458	0.033	7.22344e-87	DsRed-8
Fosb	3.73921e-08	0.368653	0.578	0.317	0.000821094	DsRed-8
Mkln1	1.02869e-08	0.368002	0.771	0.578	0.00022589	DsRed-8
Il16	1.5798e-297	0.367758	0.446	0.005	3.46908e-293	DsRed-8
Cd82	3.7001e-61	0.366675	0.398	0.037	8.12505e-57	DsRed-8
Selenof	9.59506e-16	0.366469	0.976	0.958	2.10698e-11	DsRed-8
Epsti1	2.20498e-159	0.366348	0.373	0.01	4.84192e-155	DsRed-8
Derl1	4.97846e-10	0.36625	0.855	0.649	1.09322e-05	DsRed-8
Chd9	9.37922e-07	0.366169	0.759	0.553	0.0205958	DsRed-8
Btg1	4.49454e-06	0.36493	0.855	0.767	0.0986957	DsRed-8
1810011H11Rik	2.91047e-297	0.364216	0.386	0.003	6.3911e-293	DsRed-8
Rapsn	4.33315e-99	0.363884	0.434	0.026	9.51516e-95	DsRed-8
mt-Nd4l	4.06533e-07	0.363473	0.916	0.764	0.00892707	DsRed-8
Rnpep	9.1789e-10	0.362324	0.711	0.493	2.0156e-05	DsRed-8
Ifi27	5.76551e-29	0.362252	0.53	0.12	1.26605e-24	DsRed-8
Hvcn1	4.52934e-195	0.361223	0.386	0.008	9.94597e-191	DsRed-8
Map2k1	8.41016e-07	0.36073	0.747	0.553	0.0184679	DsRed-8
Bnip2	2.373e-10	0.360503	0.687	0.416	5.21087e-06	DsRed-8
Cers2	1.70756e-11	0.360427	0.759	0.508	3.74962e-07	DsRed-8
Il18	5.3822e-58	0.360244	0.422	0.044	1.18188e-53	DsRed-8
Mtus1	1.57295e-10	0.358997	0.639	0.358	3.45404e-06	DsRed-8
Matk	5.04139e-16	0.358584	0.711	0.317	1.10704e-11	DsRed-8
Actr2	1.60566e-10	0.358405	0.904	0.794	3.52586e-06	DsRed-8
Sparcl1	8.86724e-06	0.357974	0.373	0.201	0.194716	DsRed-8
Wls	6.69281e-35	0.356571	0.41	0.065	1.46967e-30	DsRed-8
Jak3	1.03271e-60	0.356216	0.373	0.033	2.26773e-56	DsRed-8
Trim47	9.1175e-203	0.355869	0.41	0.009	2.00211e-198	DsRed-8
Slc44a2	3.06699e-14	0.355399	0.602	0.285	6.73479e-10	DsRed-8
Cln3	1.52124e-21	0.354968	0.554	0.178	3.34048e-17	DsRed-8
Fam174a	1.0075e-10	0.354425	0.687	0.399	2.21237e-06	DsRed-8
Hmox2	1.34609e-09	0.354184	0.831	0.653	2.95589e-05	DsRed-8
Slc15a3	3.67317e-184	0.353293	0.446	0.013	8.06591e-180	DsRed-8
Etv5	1.6055e-33	0.3529	0.446	0.084	3.52552e-29	DsRed-8
Stard8	1.1506e-183	0.352867	0.422	0.011	2.52659e-179	DsRed-8
Ddrgk1	2.10007e-09	0.35252	0.795	0.631	4.61154e-05	DsRed-8
Iscu	3.13346e-10	0.352358	0.892	0.724	6.88076e-06	DsRed-8
Ankrd44	2.80671e-16	0.352202	0.602	0.259	6.16327e-12	DsRed-8
Magt1	3.9885e-23	0.351412	0.494	0.135	8.75835e-19	DsRed-8
Pik3cg	0	0.351295	0.422	0.004	0	DsRed-8
Mfsd1	4.59479e-16	0.351243	0.518	0.196	1.00897e-11	DsRed-8
Sppl2a	3.07119e-12	0.350989	0.47	0.196	6.74403e-08	DsRed-8
Frrs1	1.51703e-20	0.350047	0.373	0.09	3.33125e-16	DsRed-8
Prkab1	1.35468e-13	0.349775	0.53	0.225	2.97475e-09	DsRed-8
P4ha1	1.79602e-12	0.349119	0.47	0.195	3.94387e-08	DsRed-8
Sgpl1	4.51372e-14	0.348926	0.542	0.232	9.91168e-10	DsRed-8
Arpc2	1.03905e-10	0.348859	0.976	0.968	2.28164e-06	DsRed-8
Psmb9	5.35025e-213	0.348661	0.482	0.012	1.17486e-208	DsRed-8
Sipa1l2	8.05605e-15	0.34843	0.458	0.165	1.76903e-10	DsRed-8
Retreg1	2.61885e-09	0.348422	0.771	0.503	5.75074e-05	DsRed-8
Edem2	2.02609e-12	0.3481	0.639	0.334	4.44909e-08	DsRed-8
Zc3hav1	2.84599e-185	0.347974	0.386	0.009	6.24951e-181	DsRed-8
Fcho2	1.76728e-18	0.347557	0.627	0.251	3.88077e-14	DsRed-8
Aagab	6.7255e-13	0.347239	0.651	0.346	1.47685e-08	DsRed-8
Trim26	2.17625e-08	0.346919	0.614	0.393	0.000477882	DsRed-8
Rps15a	1.31958e-12	0.346408	1	0.998	2.89766e-08	DsRed-8
Itgb1	1.96306e-09	0.346342	0.783	0.628	4.31068e-05	DsRed-8
Rbfa	1.45719e-12	0.345943	0.747	0.481	3.19984e-08	DsRed-8
Gadd45g	1.83722e-08	0.345827	0.651	0.392	0.000403436	DsRed-8
Arhgap4	3.52853e-102	0.34548	0.361	0.017	7.7483e-98	DsRed-8
Nr4a1	7.15295e-10	0.34458	0.47	0.216	1.57072e-05	DsRed-8
Il11ra1	3.72147e-29	0.344192	0.602	0.163	8.17197e-25	DsRed-8
Galnt12	1.17271e-104	0.344036	0.349	0.015	2.57515e-100	DsRed-8
Tab2	7.79763e-10	0.343923	0.699	0.474	1.71228e-05	DsRed-8
Dnajc3	1.21581e-08	0.3439	0.53	0.291	0.00026698	DsRed-8
Rsrp1	5.87406e-05	0.343629	0.952	0.98	1	DsRed-8
Hsd17b4	2.95913e-13	0.343481	0.614	0.315	6.49796e-09	DsRed-8
Tmem109	4.03361e-14	0.343096	0.554	0.252	8.85741e-10	DsRed-8
Slc50a1	3.07537e-14	0.343088	0.578	0.247	6.75321e-10	DsRed-8
Rpl9	1.27491e-17	0.343065	1	0.999	2.79957e-13	DsRed-8
Lsp1	2.36419e-49	0.342954	0.349	0.035	5.19152e-45	DsRed-8
Agpat3	1.91132e-09	0.342107	0.663	0.405	4.19706e-05	DsRed-8
Nuak1	6.91525e-10	0.341672	0.53	0.274	1.51852e-05	DsRed-8
Tspan4	2.22274e-10	0.341583	0.639	0.385	4.88091e-06	DsRed-8
Taf6l	2.34456e-09	0.340975	0.59	0.351	5.14841e-05	DsRed-8
Sertad1	1.93541e-34	0.340891	0.386	0.061	4.24996e-30	DsRed-8
Nptn	3.04708e-09	0.340763	0.94	0.758	6.69108e-05	DsRed-8
C5ar1	1.07781e-275	0.340633	0.349	0.003	2.36676e-271	DsRed-8
Rgs19	1.9509e-07	0.340421	0.651	0.49	0.00428399	DsRed-8
Hist1h1c	9.72454e-21	0.33999	0.277	0.05	2.13541e-16	DsRed-8
Trim8	8.443e-07	0.33965	0.723	0.556	0.01854	DsRed-8
Ppt1	1.03182e-08	0.339203	0.699	0.517	0.000226576	DsRed-8
Wdr26	4.00167e-09	0.339159	0.843	0.693	8.78728e-05	DsRed-8
Rps3	2.72998e-13	0.338962	1	0.998	5.99476e-09	DsRed-8
Marc2	4.17991e-10	0.338358	0.651	0.401	9.17866e-06	DsRed-8
Usp8	8.60694e-11	0.338154	0.59	0.32	1.89e-06	DsRed-8
Cdk1	1.04483e-34	0.338148	0.265	0.028	2.29434e-30	DsRed-8
Igsf6	3.55643e-246	0.33745	0.337	0.003	7.80956e-242	DsRed-8
Oaf	4.51088e-72	0.337251	0.386	0.028	9.90544e-68	DsRed-8
Acer3	7.36315e-13	0.336962	0.422	0.16	1.61687e-08	DsRed-8
Hps4	3.23108e-11	0.335115	0.602	0.333	7.09514e-07	DsRed-8
Rpl18	2.09461e-13	0.334563	1	0.999	4.59955e-09	DsRed-8
Vwa5a	1.17702e-50	0.334455	0.41	0.049	2.58462e-46	DsRed-8
Ptprj	3.93411e-20	0.332626	0.47	0.143	8.6389e-16	DsRed-8
Klf4	5.30072e-15	0.332011	0.434	0.145	1.16398e-10	DsRed-8
M6pr	1.60691e-07	0.331865	0.687	0.483	0.00352861	DsRed-8
Ets1	6.54432e-48	0.331434	0.265	0.021	1.43707e-43	DsRed-8
Gm38843	0	0.331313	0.373	0.002	0	DsRed-8
Herc2	3.42012e-06	0.331227	0.687	0.543	0.0751025	DsRed-8
Plbd2	3.38631e-15	0.330894	0.554	0.233	7.436e-11	DsRed-8
Myd88	1.25617e-66	0.330743	0.398	0.034	2.75843e-62	DsRed-8
Ggta1	1.9565e-83	0.3301	0.398	0.026	4.29629e-79	DsRed-8
Wapl	9.49752e-11	0.329744	0.675	0.397	2.08556e-06	DsRed-8
Pmaip1	4.73908e-216	0.329599	0.373	0.006	1.04065e-211	DsRed-8
Rab5c	1.28975e-07	0.329415	0.843	0.762	0.00283217	DsRed-8
Aldh2	7.75276e-08	0.328226	0.687	0.489	0.00170243	DsRed-8
Acaa1a	1.19388e-08	0.328185	0.759	0.572	0.000262163	DsRed-8
Egr2	5.37969e-84	0.327427	0.217	0.007	1.18133e-79	DsRed-8
Cd74	5.67353e-99	0.326818	0.373	0.019	1.24585e-94	DsRed-8
Plcg2	9.57687e-122	0.326328	0.434	0.021	2.10299e-117	DsRed-8
Wdfy2	1.62761e-20	0.326259	0.518	0.163	3.57407e-16	DsRed-8
Fkbp15	1.99086e-25	0.326175	0.53	0.146	4.37172e-21	DsRed-8
Ptp4a2	2.11327e-08	0.326084	0.976	0.839	0.000464053	DsRed-8
Klhl6	0	0.3259	0.41	0.003	0	DsRed-8
Agmo	2.04587e-205	0.325753	0.277	0.003	4.49252e-201	DsRed-8
Tmed9	2.79988e-07	0.325296	0.916	0.819	0.00614825	DsRed-8
Fbrsl1	4.70005e-07	0.325264	0.771	0.562	0.0103208	DsRed-8
Coro1b	2.04981e-10	0.323882	0.723	0.439	4.50117e-06	DsRed-8
Clint1	8.16488e-09	0.322909	0.627	0.389	0.000179293	DsRed-8
Arhgef6	2.56546e-63	0.322828	0.398	0.036	5.63349e-59	DsRed-8
Plod3	1.61897e-14	0.322821	0.542	0.227	3.55509e-10	DsRed-8
Itgav	1.47754e-66	0.32207	0.337	0.024	3.24454e-62	DsRed-8
BC028528	3.46746e-96	0.321754	0.373	0.02	7.61419e-92	DsRed-8
Agps	4.617e-08	0.321457	0.566	0.352	0.00101385	DsRed-8
Slc1a3	6.96355e-25	0.321431	0.301	0.049	1.52913e-20	DsRed-8
Soat1	2.74097e-20	0.321387	0.349	0.08	6.0189e-16	DsRed-8
Rab32	1.86774e-179	0.321338	0.434	0.012	4.10138e-175	DsRed-8
Nucb1	8.17018e-13	0.321286	0.723	0.43	1.79409e-08	DsRed-8
Tnfrsf17	1.59966e-278	0.320971	0.313	0.002	3.51269e-274	DsRed-8
Tuba1c	1.51339e-71	0.320905	0.325	0.02	3.32326e-67	DsRed-8
Rpl28	3.207e-13	0.320769	1	0.998	7.04225e-09	DsRed-8
Ncf4	1.34227e-215	0.320551	0.398	0.007	2.94749e-211	DsRed-8
Snn	0.00336632	0.319907	0.711	0.651	1	DsRed-8
Tmem59	1.60295e-11	0.3199	0.964	0.907	3.51992e-07	DsRed-8
Arl5c	3.14669e-47	0.319378	0.325	0.032	6.90983e-43	DsRed-8
Rock2	1.66807e-06	0.319147	0.711	0.537	0.0366291	DsRed-8
Tmem135	3.90466e-12	0.318996	0.53	0.246	8.57425e-08	DsRed-8
Stat3	1.01325e-11	0.318501	0.566	0.272	2.225e-07	DsRed-8
Ccdc22	2.59224e-15	0.318094	0.566	0.232	5.6923e-11	DsRed-8
mt-Atp8	5.884e-07	0.317829	0.759	0.534	0.0129207	DsRed-8
Mapk14	8.37307e-13	0.317204	0.675	0.36	1.83864e-08	DsRed-8
Hdlbp	2.70618e-08	0.31675	0.687	0.455	0.00059425	DsRed-8
Csad	2.16097e-12	0.316299	0.482	0.206	4.74527e-08	DsRed-8
Havcr2	2.61979e-298	0.316147	0.337	0.002	5.75281e-294	DsRed-8
Diaph2	2.17416e-17	0.315872	0.41	0.119	4.77424e-13	DsRed-8
Ctdsp1	1.02395e-48	0.315061	0.41	0.048	2.24849e-44	DsRed-8
Slc46a3	1.10971e-97	0.315005	0.313	0.013	2.43681e-93	DsRed-8
Cotl1	6.59414e-07	0.314878	0.952	0.873	0.0144801	DsRed-8
Rpn2	7.03204e-08	0.314769	0.843	0.743	0.00154417	DsRed-8
Cd48	1.72918e-226	0.314727	0.313	0.003	3.7971e-222	DsRed-8
Ncoa3	1.01352e-10	0.314312	0.699	0.41	2.22558e-06	DsRed-8
Hacd4	1.532e-112	0.314227	0.361	0.015	3.36411e-108	DsRed-8
Crat	6.40536e-16	0.313933	0.542	0.206	1.40655e-11	DsRed-8
Atp6ap2	3.87527e-06	0.313906	0.819	0.738	0.085097	DsRed-8
Rab8b	2.53158e-23	0.313686	0.614	0.206	5.5591e-19	DsRed-8
Rps16	2.1031e-11	0.313564	0.988	0.998	4.61819e-07	DsRed-8
Grap	1.07267e-234	0.313294	0.386	0.006	2.35547e-230	DsRed-8
Ubtd1	6.5414e-17	0.31298	0.482	0.168	1.43643e-12	DsRed-8
Slc9a9	1.39715e-22	0.31217	0.398	0.094	3.06801e-18	DsRed-8
Dgkd	7.97889e-08	0.311814	0.578	0.352	0.00175208	DsRed-8
Stxbp3	6.39298e-30	0.310085	0.434	0.086	1.40384e-25	DsRed-8
Suclg2	6.39367e-22	0.310017	0.386	0.09	1.40399e-17	DsRed-8
Ifngr2	2.60854e-07	0.309661	0.735	0.555	0.0057281	DsRed-8
Orai3	2.07746e-13	0.309533	0.422	0.152	4.5619e-09	DsRed-8
Asap1	1.56486e-11	0.309376	0.747	0.45	3.43627e-07	DsRed-8
Hscb	1.33563e-15	0.309343	0.422	0.144	2.93291e-11	DsRed-8
Erbin	8.72261e-15	0.309025	0.566	0.236	1.9154e-10	DsRed-8
Scaf11	2.82364e-09	0.308773	0.699	0.472	6.20043e-05	DsRed-8
Gp9	4.10559e-234	0.308743	0.253	0.001	9.01547e-230	DsRed-8
Jak1	3.51739e-10	0.308605	0.711	0.46	7.72383e-06	DsRed-8
Dap	4.73197e-09	0.308498	0.554	0.295	0.000103909	DsRed-8
Sf3b1	1.27207e-07	0.307831	0.904	0.856	0.00279333	DsRed-8
Selenos	7.05063e-06	0.30757	0.759	0.641	0.154825	DsRed-8
Gm13889	4.31837e-10	0.307444	0.482	0.213	9.48271e-06	DsRed-8
Btk	1.15688e-240	0.307194	0.361	0.004	2.5404e-236	DsRed-8
Abcc3	1.3952e-179	0.307095	0.373	0.008	3.06372e-175	DsRed-8
Pdia3	6.4705e-07	0.307048	0.916	0.872	0.0142086	DsRed-8
Itga9	2.90443e-55	0.306633	0.337	0.029	6.37783e-51	DsRed-8
Sema4d	2.74285e-08	0.306586	0.494	0.26	0.000602303	DsRed-8
Rest	1.60059e-64	0.306027	0.386	0.032	3.51474e-60	DsRed-8
Dbi	3.44281e-09	0.305693	0.88	0.729	7.56006e-05	DsRed-8
Tep1	6.23855e-48	0.305392	0.349	0.037	1.36992e-43	DsRed-8
Washc4	1.52946e-15	0.305116	0.59	0.251	3.35854e-11	DsRed-8
Neurl3	8.45462e-120	0.304423	0.349	0.013	1.85655e-115	DsRed-8
Tmcc3	9.87359e-08	0.304401	0.446	0.223	0.00216814	DsRed-8
Frmd8	3.8951e-47	0.303923	0.422	0.054	8.55325e-43	DsRed-8
Ptpre	2.06276e-15	0.303802	0.446	0.153	4.52961e-11	DsRed-8
Camk1d	1.29316e-20	0.303757	0.446	0.122	2.83964e-16	DsRed-8
Lpar6	5.9379e-14	0.30346	0.277	0.069	1.3039e-09	DsRed-8
Snx9	1.25512e-34	0.303422	0.53	0.112	2.75612e-30	DsRed-8
Abl1	5.17238e-11	0.30326	0.578	0.282	1.1358e-06	DsRed-8
Arhgef1	1.16013e-10	0.303101	0.518	0.247	2.54753e-06	DsRed-8
Rab31	9.17946e-14	0.302389	0.482	0.184	2.01572e-09	DsRed-8
Ednrb	1.27718e-53	0.302277	0.265	0.018	2.80457e-49	DsRed-8
Chst7	2.93573e-37	0.30224	0.349	0.048	6.44657e-33	DsRed-8
Slc2a8	3.05429e-16	0.301956	0.506	0.179	6.70691e-12	DsRed-8
Stat1	2.29552e-15	0.301242	0.301	0.075	5.04073e-11	DsRed-8
Scp2	1.11188e-08	0.301124	0.904	0.803	0.000244157	DsRed-8
Rogdi	1.58312e-07	0.300944	0.843	0.656	0.00347638	DsRed-8
Rreb1	1.53275e-48	0.30067	0.446	0.058	3.36578e-44	DsRed-8
Naglu	1.51826e-25	0.299556	0.458	0.11	3.33395e-21	DsRed-8
Rbm47	2.26899e-177	0.299372	0.313	0.005	4.98248e-173	DsRed-8
Tmem100	9.83025e-39	0.298497	0.337	0.042	2.15862e-34	DsRed-8
Cux1	2.32184e-06	0.298432	0.795	0.726	0.0509852	DsRed-8
Tanc2	1.09722e-06	0.298328	0.771	0.587	0.0240938	DsRed-8
Wsb1	3.64054e-05	0.297952	0.88	0.865	0.799426	DsRed-8
Exosc5	1.04048e-11	0.29771	0.566	0.27	2.2848e-07	DsRed-8
Stk10	4.13495e-84	0.297545	0.325	0.017	9.07994e-80	DsRed-8
Serf2	1.89399e-07	0.297359	0.988	0.97	0.00415902	DsRed-8
Irak1	1.15583e-09	0.297216	0.663	0.385	2.53809e-05	DsRed-8
Slc37a2	1.27732e-147	0.297086	0.349	0.01	2.80486e-143	DsRed-8
Ggh	3.45904e-09	0.296523	0.627	0.367	7.5957e-05	DsRed-8
Sord	1.392e-16	0.296454	0.494	0.176	3.05669e-12	DsRed-8
Zfp703	3.13261e-12	0.296331	0.398	0.141	6.87889e-08	DsRed-8
Pag1	1.8332e-28	0.296253	0.554	0.139	4.02553e-24	DsRed-8
Tmem14c	6.4048e-06	0.296094	0.88	0.807	0.140643	DsRed-8
Fuca2	3.90683e-13	0.295599	0.639	0.324	8.57901e-09	DsRed-8
Gpr155	2.03583e-26	0.295504	0.422	0.093	4.47048e-22	DsRed-8
Abcg2	4.14221e-09	0.295431	0.434	0.201	9.09588e-05	DsRed-8
Slc35b2	1.04904e-06	0.295312	0.542	0.335	0.0230358	DsRed-8
Taldo1	4.29357e-05	0.295062	0.904	0.844	0.942824	DsRed-8
Mlxipl	1.83557e-126	0.294991	0.265	0.006	4.03073e-122	DsRed-8
St3gal5	3.52327e-06	0.294942	0.711	0.52	0.0773674	DsRed-8
Fam46c	3.98821e-85	0.294217	0.277	0.012	8.75772e-81	DsRed-8
Mcur1	2.55628e-24	0.294202	0.506	0.133	5.61333e-20	DsRed-8
Akt1	8.40166e-06	0.29386	0.867	0.783	0.184492	DsRed-8
Psme1	1.1581e-08	0.293446	0.928	0.803	0.000254307	DsRed-8
Vrk1	3.77596e-10	0.293384	0.458	0.203	8.29162e-06	DsRed-8
Trp53	4.46353e-10	0.293355	0.759	0.501	9.80146e-06	DsRed-8
Hadhb	5.81201e-08	0.292151	0.614	0.4	0.00127626	DsRed-8
Pdia6	9.37354e-05	0.291635	0.855	0.767	1	DsRed-8
Cklf	1.19295e-10	0.291502	0.53	0.25	2.6196e-06	DsRed-8
Rps2	2.70226e-13	0.291416	1	0.999	5.9339e-09	DsRed-8
Inpp4b	5.61911e-17	0.290835	0.386	0.107	1.2339e-12	DsRed-8
Purb	4.87044e-08	0.290767	0.747	0.502	0.0010695	DsRed-8
Map2k3	3.52987e-15	0.290631	0.422	0.136	7.75124e-11	DsRed-8
Lrrfip1	1.38844e-07	0.290474	0.542	0.312	0.00304888	DsRed-8
Dusp7	8.47833e-14	0.290432	0.446	0.163	1.86176e-09	DsRed-8
Cerk	3.05518e-13	0.290041	0.554	0.247	6.70888e-09	DsRed-8
Rac1	3.4491e-09	0.290024	0.952	0.912	7.57389e-05	DsRed-8
Arap3	9.5209e-132	0.289592	0.337	0.01	2.09069e-127	DsRed-8
Gpaa1	1.79832e-05	0.289177	0.663	0.515	0.394893	DsRed-8
Bcl2l12	1.04176e-47	0.28915	0.301	0.027	2.2876e-43	DsRed-8
Akr1b3	3.32014e-08	0.28908	0.795	0.594	0.00072907	DsRed-8
Smarcd2	3.75857e-21	0.289068	0.434	0.112	8.25343e-17	DsRed-8
Zbtb18	1.38214e-21	0.288317	0.446	0.12	3.03505e-17	DsRed-8
Ubash3b	2.5203e-08	0.287889	0.639	0.388	0.000553432	DsRed-8
I830077J02Rik	5.21417e-217	0.286984	0.313	0.004	1.14498e-212	DsRed-8
Rragc	1.01257e-08	0.286928	0.723	0.517	0.000222349	DsRed-8
S1pr1	1.11475e-84	0.286172	0.289	0.013	2.44787e-80	DsRed-8
Eva1b	1.00927e-40	0.284291	0.325	0.036	2.21625e-36	DsRed-8
Hat1	1.35978e-05	0.283311	0.398	0.228	0.298593	DsRed-8
Sall3	9.47573e-58	0.282756	0.337	0.027	2.08078e-53	DsRed-8
Abcg1	3.69333e-10	0.282308	0.434	0.191	8.11018e-06	DsRed-8
Rilpl2	1.25225e-07	0.282255	0.542	0.333	0.00274982	DsRed-8
Dcaf8	7.3629e-06	0.281639	0.639	0.451	0.161682	DsRed-8
Myo9b	8.41813e-14	0.28114	0.446	0.162	1.84854e-09	DsRed-8
Nhlrc3	8.1158e-21	0.280896	0.386	0.09	1.78215e-16	DsRed-8
Elovl1	1.97228e-17	0.280375	0.47	0.148	4.33093e-13	DsRed-8
Rbm3	4.73202e-09	0.279764	0.988	0.971	0.00010391	DsRed-8
Whrn	1.62927e-11	0.278832	0.41	0.156	3.57771e-07	DsRed-8
Coq10b	0.000427207	0.278826	0.554	0.416	1	DsRed-8
Tmed10	0.000123905	0.278487	0.88	0.802	1	DsRed-8
Mdfi	7.02569e-35	0.278351	0.277	0.031	1.54277e-30	DsRed-8
1810037I17Rik	0.000275721	0.2783	0.747	0.719	1	DsRed-8
Usf2	0.000164532	0.278025	0.783	0.67	1	DsRed-8
Naga	4.43717e-24	0.277684	0.386	0.083	9.74358e-20	DsRed-8
Tnni2	2.34149e-286	0.277189	0.313	0.002	5.14168e-282	DsRed-8
Ssfa2	4.06617e-27	0.276824	0.349	0.062	8.9289e-23	DsRed-8
Lgals3bp	1.1447e-30	0.276485	0.325	0.048	2.51364e-26	DsRed-8
Serp1	8.75434e-05	0.276233	0.687	0.543	1	DsRed-8
Trim30a	1.80162e-217	0.274256	0.277	0.002	3.95619e-213	DsRed-8
N4bp2l1	1.07931e-08	0.273896	0.639	0.35	0.000237006	DsRed-8
Lrmp	3.38959e-129	0.273872	0.349	0.012	7.44321e-125	DsRed-8
Atraid	1.91945e-07	0.273681	0.867	0.756	0.00421492	DsRed-8
Atp13a3	2.35306e-09	0.273635	0.482	0.241	5.16708e-05	DsRed-8
Sypl	2.22802e-11	0.273027	0.53	0.252	4.89251e-07	DsRed-8
Swap70	4.7994e-68	0.272679	0.361	0.027	1.0539e-63	DsRed-8
Vps37b	4.33399e-08	0.272443	0.639	0.398	0.0009517	DsRed-8
H2-Q4	3.45804e-58	0.272141	0.313	0.024	7.59352e-54	DsRed-8
Clu	0.00109792	0.271951	0.47	0.315	1	DsRed-8
Kcnk6	5.86317e-138	0.271897	0.289	0.007	1.28749e-133	DsRed-8
Lrch1	0.00112678	0.271603	0.301	0.182	1	DsRed-8
Gm5086	1.13589e-255	0.271471	0.361	0.004	2.49431e-251	DsRed-8
Acsl5	8.57945e-12	0.271132	0.566	0.272	1.88396e-07	DsRed-8
BC017643	1.06068e-06	0.27031	0.494	0.285	0.0232914	DsRed-8
Tfe3	4.01343e-08	0.270123	0.482	0.243	0.000881308	DsRed-8
Stat6	5.06535e-101	0.269888	0.325	0.013	1.1123e-96	DsRed-8
Rgs7bp	3.65439e-14	0.269546	0.446	0.161	8.02468e-10	DsRed-8
Snx30	8.81737e-06	0.269517	0.542	0.38	0.193621	DsRed-8
Zfhx3	8.7503e-06	0.268975	0.867	0.771	0.192148	DsRed-8
Hspa1b	2.29171e-18	0.268772	0.253	0.048	5.03237e-14	DsRed-8
Anxa6	3.70557e-22	0.268528	0.422	0.104	8.13706e-18	DsRed-8
Tbk1	7.35525e-09	0.268526	0.494	0.252	0.000161514	DsRed-8
Zcchc6	9.22211e-07	0.268452	0.566	0.349	0.0202508	DsRed-8
Atp1b3	1.13103e-05	0.268313	0.759	0.629	0.248364	DsRed-8
Il13ra1	8.44743e-23	0.267697	0.337	0.068	1.85497e-18	DsRed-8
Cracr2b	5.41425e-113	0.267431	0.313	0.011	1.18892e-108	DsRed-8
Pkig	8.7898e-08	0.266833	0.904	0.759	0.00193015	DsRed-8
Lat2	7.65e-59	0.26666	0.313	0.023	1.67986e-54	DsRed-8
Rpl3	2.59781e-11	0.266512	1	0.998	5.70453e-07	DsRed-8
Crlf2	3.98407e-06	0.266425	0.446	0.268	0.0874863	DsRed-8
Liph	7.17679e-94	0.266338	0.205	0.005	1.57595e-89	DsRed-8
Gmpr2	2.02397e-09	0.265892	0.542	0.282	4.44444e-05	DsRed-8
Rela	3.961e-21	0.265593	0.482	0.135	8.69797e-17	DsRed-8
Tln2	2.02758e-06	0.265399	0.47	0.275	0.0445235	DsRed-8
Ldlrad4	1.31414e-10	0.265065	0.277	0.087	2.88572e-06	DsRed-8
Vamp3	7.53714e-07	0.264651	0.614	0.414	0.0165508	DsRed-8
Paqr7	6.25078e-11	0.264585	0.422	0.174	1.37261e-06	DsRed-8
Mpi	7.0124e-07	0.264006	0.542	0.347	0.0153985	DsRed-8
Dusp3	8.93427e-08	0.263305	0.554	0.327	0.00196188	DsRed-8
Sh3gl1	2.4577e-07	0.263131	0.627	0.405	0.00539686	DsRed-8
Tspan14	6.18495e-06	0.26309	0.446	0.255	0.135815	DsRed-8
Sirt2	1.36536e-06	0.262558	0.831	0.721	0.0299819	DsRed-8
2510039O18Rik	0.000148699	0.262182	0.482	0.336	1	DsRed-8
Rasa3	1.79487e-30	0.262067	0.398	0.072	3.94136e-26	DsRed-8
Ebi3	1.25393e-12	0.261949	0.446	0.173	2.7535e-08	DsRed-8
Csf2rb	2.08806e-167	0.261776	0.313	0.006	4.58517e-163	DsRed-8
Pxn	1.05512e-19	0.261578	0.446	0.123	2.31694e-15	DsRed-8
Casp1	1.63062e-132	0.261546	0.313	0.009	3.58068e-128	DsRed-8
Aldoc	0.000340758	0.261418	0.41	0.252	1	DsRed-8
Atp1a2	0.000921669	0.261296	0.157	0.069	1	DsRed-8
Ost4	2.13368e-06	0.26129	0.843	0.732	0.0468535	DsRed-8
Nfatc2	4.97781e-12	0.261245	0.373	0.133	1.09308e-07	DsRed-8
Ppp6r1	2.38781e-11	0.261189	0.566	0.275	5.2434e-07	DsRed-8
Eva1a	6.78971e-118	0.261124	0.205	0.003	1.49095e-113	DsRed-8
Psmb10	6.78378e-07	0.261091	0.687	0.496	0.0148965	DsRed-8
Rpl34	1.51083e-09	0.260805	1	0.998	3.31763e-05	DsRed-8
Paox	5.65383e-10	0.26041	0.386	0.152	1.24153e-05	DsRed-8
H2-T23	6.4375e-50	0.260305	0.373	0.039	1.41361e-45	DsRed-8
Osbpl11	2.46418e-06	0.260189	0.434	0.239	0.0541109	DsRed-8
Slc15a4	2.32063e-09	0.259603	0.422	0.195	5.09586e-05	DsRed-8
Mef2d	4.27414e-08	0.259197	0.554	0.325	0.000938557	DsRed-8
Scoc	0.00116695	0.258898	0.892	0.833	1	DsRed-8
Pkib	5.72367e-08	0.258756	0.518	0.271	0.00125686	DsRed-8
Hmgcl	5.20609e-10	0.258519	0.578	0.312	1.14321e-05	DsRed-8
Sptlc2	3.13591e-05	0.258282	0.578	0.424	0.688614	DsRed-8
Fabp7	1.26675e-13	0.258174	0.386	0.126	2.78166e-09	DsRed-8
Tmem144	3.57213e-93	0.258138	0.325	0.015	7.84404e-89	DsRed-8
Leprot	2.47173e-05	0.257943	0.783	0.644	0.542768	DsRed-8
Cysltr1	3.35908e-177	0.257938	0.277	0.004	7.3762e-173	DsRed-8
Rps6ka4	7.33929e-22	0.257924	0.41	0.102	1.61163e-17	DsRed-8
Vkorc1	3.37134e-08	0.257725	0.639	0.38	0.000740312	DsRed-8
Abcd2	1.32802e-52	0.257694	0.337	0.031	2.91619e-48	DsRed-8
Itsn2	3.99253e-10	0.257364	0.482	0.221	8.7672e-06	DsRed-8
Hist1h2bc	6.47856e-19	0.25734	0.41	0.104	1.42263e-14	DsRed-8
Tcf4	1.19322e-08	0.257318	0.795	0.536	0.000262018	DsRed-8
Dguok	2.31804e-06	0.257242	0.663	0.489	0.0509019	DsRed-8
Man2b2	4.61197e-29	0.256927	0.337	0.055	1.01274e-24	DsRed-8
Baz1a	9.60759e-30	0.25678	0.386	0.066	2.10973e-25	DsRed-8
Lman2	9.92482e-07	0.256728	0.663	0.456	0.0217939	DsRed-8
Dopey2	2.63855e-07	0.256651	0.482	0.285	0.00579399	DsRed-8
Pla2g7	3.38388e-18	0.256545	0.253	0.048	7.43067e-14	DsRed-8
Arl11	8.32422e-304	0.256536	0.349	0.002	1.82792e-299	DsRed-8
Tap1	1.913e-97	0.256525	0.301	0.012	4.20075e-93	DsRed-8
Nsa2	0.00115647	0.255891	0.831	0.816	1	DsRed-8
Prps2	2.27976e-28	0.255667	0.349	0.061	5.00612e-24	DsRed-8
Smo	4.96369e-18	0.255264	0.349	0.085	1.08998e-13	DsRed-8
Spp1	7.50475e-08	0.255226	0.12	0.026	0.00164797	DsRed-8
Tmem206	2.34708e-10	0.255107	0.47	0.207	5.15396e-06	DsRed-8
Pex7	3.9967e-07	0.254123	0.566	0.35	0.00877636	DsRed-8
mt-Cytb	3.85466e-07	0.25357	1	1	0.00846444	DsRed-8
Zc3h12a	2.29157e-142	0.253149	0.313	0.008	5.03205e-138	DsRed-8
Pepd	5.85286e-07	0.252955	0.602	0.405	0.0128523	DsRed-8
Eef2k	5.69395e-06	0.252791	0.422	0.247	0.125033	DsRed-8
Tpcn1	4.3845e-33	0.252451	0.361	0.054	9.62792e-29	DsRed-8
Itpripl1	2.21165e-25	0.251234	0.361	0.069	4.85655e-21	DsRed-8
Ggt5	3.47549e-21	0.251213	0.205	0.028	7.63182e-17	DsRed-8
Pla2g4a	1.84081e-223	0.250815	0.277	0.002	4.04223e-219	DsRed-8
2310011J03Rik	2.15694e-08	0.250564	0.566	0.323	0.000473643	DsRed-8
Eng	3.11696e-77	0.250473	0.265	0.012	6.84454e-73	DsRed-8
Fam91a1	8.09769e-07	0.250274	0.59	0.378	0.0177817	DsRed-8
Tmem140	3.72885e-184	0.249915	0.289	0.004	8.18818e-180	DsRed-8
Tec	2.70277e-119	0.249694	0.289	0.008	5.93502e-115	DsRed-8
Ube2q1	3.83547e-06	0.249528	0.723	0.537	0.0842231	DsRed-8
Derl2	2.56146e-07	0.24948	0.566	0.356	0.00562472	DsRed-8
B4galt4	2.30583e-06	0.248947	0.373	0.19	0.0506338	DsRed-8
Trib1	5.67903e-10	0.248898	0.325	0.114	1.24706e-05	DsRed-8
Son	0.000704285	0.248647	0.988	0.944	1	DsRed-8
Plgrkt	0.000835036	0.248441	0.687	0.575	1	DsRed-8
Syf2	1.17676e-07	0.248227	0.783	0.584	0.00258405	DsRed-8
Scn1b	3.18986e-06	0.248168	0.434	0.229	0.070046	DsRed-8
Dennd5a	6.46376e-06	0.247938	0.639	0.459	0.141938	DsRed-8
Smim15	0.000433447	0.247633	0.506	0.388	1	DsRed-8
Laptm4a	1.89941e-07	0.247365	0.952	0.906	0.00417092	DsRed-8
Osm	1.44327e-149	0.247139	0.217	0.002	3.16927e-145	DsRed-8
Hcst	6.70759e-199	0.246802	0.313	0.004	1.47292e-194	DsRed-8
Was	1.94668e-263	0.246611	0.313	0.002	4.27471e-259	DsRed-8
Zbtb1	1.65608e-14	0.246466	0.337	0.094	3.63658e-10	DsRed-8
Hsd17b11	1.84999e-18	0.246013	0.398	0.11	4.06239e-14	DsRed-8
Dock4	3.34698e-05	0.245877	0.518	0.336	0.734964	DsRed-8
Adam9	1.36387e-13	0.245717	0.386	0.129	2.99491e-09	DsRed-8

## Sheet: DsRed-9
Figure 1-source data 4 (corresponding to Figure1-figure supplement 3). Feature genes that define each of the 9 DsRed
clusters integrated across all six developmental stages.
The data are sorted from highest to lowest for each integrated custer by average log fold-change > 0.25 (avg_logFC)
of gene expression in the featured cluster relative to all other clusters.
pct.1, Percentage of cells in the indicated cluster with significant differential gene expression
pct.2, Percentage of cells in all other clusters with significant differential gene expression
p-val, p-value
p_val_adj, adjusted p-value for multiple comparisons
The Wilcoxon test was performed to identify the differentially expressed genes in each cluster
Gene	p_val	avg_logFC	pct.1	pct.2	p_val_adj	cluster
Lgals1	3.94909e-138	2.71156	0.827	0.136	8.67181e-134	DsRed-9
Col3a1	2.69496e-260	2.69902	0.729	0.044	5.91786e-256	DsRed-9
Apoe	5.67534e-78	2.68031	0.91	0.295	1.24625e-73	DsRed-9
Serpinh1	7.9885e-94	2.4144	0.865	0.259	1.75419e-89	DsRed-9
Vtn	0	2.40563	0.677	0.028	0	DsRed-9
Fabp7	5.67436e-63	2.30926	0.579	0.119	1.24603e-58	DsRed-9
Col1a2	4.83474e-282	2.26658	0.722	0.038	1.06166e-277	DsRed-9
Sparc	2.85584e-231	2.12817	0.94	0.095	6.27113e-227	DsRed-9
Cxcl12	0	1.97148	0.737	0.033	0	DsRed-9
Col4a1	2.34129e-133	1.97012	0.752	0.112	5.14124e-129	DsRed-9
Mest	3.27038e-38	1.96983	0.805	0.524	7.18143e-34	DsRed-9
Mdk	7.79583e-133	1.96971	0.88	0.168	1.71189e-128	DsRed-9
Igfbp2	1.07012e-56	1.95187	0.85	0.416	2.34988e-52	DsRed-9
Col1a1	0	1.92291	0.714	0.016	0	DsRed-9
Sparcl1	2.3234e-109	1.91766	0.842	0.188	5.10195e-105	DsRed-9
Bgn	0	1.91685	0.722	0.016	0	DsRed-9
Igfbp4	9.91347e-79	1.89082	0.842	0.297	2.1769e-74	DsRed-9
H19	4.22891e-213	1.82849	0.669	0.045	9.28626e-209	DsRed-9
Dbi	2.36633e-48	1.79181	0.955	0.726	5.19622e-44	DsRed-9
Hmgb2	1.86278e-59	1.71953	0.88	0.398	4.09047e-55	DsRed-9
Pltp	0	1.70301	0.729	0.02	0	DsRed-9
Atp1a2	2.19727e-217	1.66049	0.729	0.054	4.82499e-213	DsRed-9
S100a11	2.76798e-71	1.63669	0.782	0.257	6.07821e-67	DsRed-9
Dcn	1.79487e-192	1.6103	0.361	0.011	3.94136e-188	DsRed-9
Id3	1.25295e-156	1.54463	0.842	0.115	2.75136e-152	DsRed-9
Slc1a3	0	1.53682	0.842	0.034	0	DsRed-9
Anxa2	2.77971e-195	1.50953	0.774	0.073	6.10396e-191	DsRed-9
Lum	0	1.50739	0.707	0.013	0	DsRed-9
Ptn	2.4337e-29	1.50195	0.947	0.728	5.34416e-25	DsRed-9
S100a6	0	1.49545	0.707	0.016	0	DsRed-9
Fbln1	1.66752e-223	1.45161	0.699	0.048	3.6617e-219	DsRed-9
Selenop	1.00338e-152	1.43832	0.797	0.096	2.20332e-148	DsRed-9
Mfap2	1.8103e-41	1.43084	0.827	0.57	3.97524e-37	DsRed-9
Col4a2	2.22466e-101	1.42012	0.729	0.143	4.88512e-97	DsRed-9
Cthrc1	9.44961e-85	1.37641	0.797	0.211	2.07504e-80	DsRed-9
Gja1	0	1.36105	0.744	0.02	0	DsRed-9
Colec12	0	1.35812	0.767	0.022	0	DsRed-9
Nkd1	6.39265e-119	1.33832	0.729	0.114	1.40376e-114	DsRed-9
Pclaf	1.22765e-276	1.33556	0.549	0.018	2.6958e-272	DsRed-9
Cnn2	0	1.33295	0.684	0.019	0	DsRed-9
Cd63	8.37848e-65	1.32575	0.97	0.685	1.83983e-60	DsRed-9
Ube2c	1.15142e-105	1.30064	0.481	0.049	2.52839e-101	DsRed-9
Myl12a	1.96831e-71	1.29724	0.872	0.339	4.3222e-67	DsRed-9
Ifitm2	4.82341e-92	1.26743	0.827	0.207	1.05917e-87	DsRed-9
Zfp36l1	0	1.25849	0.902	0.041	0	DsRed-9
Plpp3	1.42382e-94	1.25446	0.669	0.112	3.12658e-90	DsRed-9
Rcn3	3.39372e-159	1.23356	0.752	0.086	7.45226e-155	DsRed-9
Col26a1	2.50929e-178	1.17922	0.722	0.07	5.51015e-174	DsRed-9
Vim	3.16339e-36	1.1753	0.917	0.698	6.9465e-32	DsRed-9
Eva1b	0	1.17519	0.744	0.023	0	DsRed-9
Ppic	0	1.11411	0.789	0.033	0	DsRed-9
Zic1	8.45095e-71	1.09304	0.729	0.16	1.85574e-66	DsRed-9
Birc5	1.07552e-105	1.07645	0.526	0.06	2.36173e-101	DsRed-9
Serpinf1	4.19195e-180	1.07541	0.669	0.056	9.20511e-176	DsRed-9
Laptm4a	1.22419e-50	1.06708	0.985	0.905	2.6882e-46	DsRed-9
Cks2	3.55259e-46	1.06565	0.632	0.2	7.80114e-42	DsRed-9
Tpm4	8.05296e-56	1.05849	0.872	0.447	1.76835e-51	DsRed-9
Fstl1	2.19306e-69	1.05146	0.805	0.272	4.81574e-65	DsRed-9
Hes1	1.33329e-277	1.04774	0.714	0.036	2.92778e-273	DsRed-9
Dab2	0	1.04618	0.744	0.018	0	DsRed-9
Mfap4	7.11957e-152	1.03534	0.699	0.07	1.56339e-147	DsRed-9
Fbn2	1.05501e-199	1.02884	0.669	0.05	2.3167e-195	DsRed-9
Emp3	1.36722e-219	1.02732	0.759	0.06	3.00228e-215	DsRed-9
Slc22a6	0	1.02581	0.579	0.007	0	DsRed-9
Rhoc	6.50631e-114	1.01986	0.835	0.166	1.42872e-109	DsRed-9
Apod	0	1.01876	0.624	0.012	0	DsRed-9
Prdx4	7.94339e-63	1.01875	0.925	0.451	1.74429e-58	DsRed-9
Gpc3	5.06e-76	1.01848	0.714	0.166	1.11113e-71	DsRed-9
Nbl1	3.45442e-176	1.01214	0.586	0.04	7.58555e-172	DsRed-9
Hist1h2ap	7.04606e-62	0.993813	0.414	0.061	1.54724e-57	DsRed-9
Mfge8	2.303e-118	0.982806	0.609	0.067	5.05715e-114	DsRed-9
Anxa5	1.0602e-63	0.9788	0.88	0.35	2.3281e-59	DsRed-9
Ppib	3.98429e-56	0.97681	0.992	0.857	8.7491e-52	DsRed-9
Fcer1g	0.00111925	0.973731	0.113	0.052	1	DsRed-9
Flrt2	6.10058e-80	0.970078	0.737	0.173	1.33963e-75	DsRed-9
Cks1b	1.123e-35	0.9699	0.812	0.489	2.46599e-31	DsRed-9
Tead2	8.14346e-206	0.963596	0.774	0.065	1.78822e-201	DsRed-9
Ednrb	8.63428e-32	0.960591	0.165	0.018	1.896e-27	DsRed-9
Cst3	0.0070411	0.955423	1	0.944	1	DsRed-9
Fcgrt	1.30189e-242	0.95307	0.556	0.023	2.85883e-238	DsRed-9
Cyba	9.55197e-187	0.951908	0.707	0.056	2.09752e-182	DsRed-9
Gpx8	0	0.950321	0.774	0.025	0	DsRed-9
Wls	7.26128e-255	0.942441	0.797	0.053	1.5945e-250	DsRed-9
Islr	0	0.934563	0.549	0.012	0	DsRed-9
H2afv	8.98235e-46	0.932503	0.97	0.882	1.97243e-41	DsRed-9
Cald1	3.44225e-68	0.929688	0.707	0.189	7.55884e-64	DsRed-9
Top2a	5.86599e-275	0.925369	0.511	0.015	1.28811e-270	DsRed-9
Rbp1	4.86809e-29	0.924894	0.759	0.369	1.06898e-24	DsRed-9
Ier3	1.44255e-39	0.922486	0.436	0.099	3.16769e-35	DsRed-9
Tril	5.25156e-72	0.91893	0.752	0.192	1.15319e-67	DsRed-9
Slc6a13	3.87786e-171	0.91582	0.398	0.017	8.51538e-167	DsRed-9
Anxa6	3.19239e-151	0.91164	0.759	0.093	7.01016e-147	DsRed-9
Clic1	6.81675e-49	0.906738	0.902	0.395	1.49689e-44	DsRed-9
Oaf	0	0.903631	0.759	0.016	0	DsRed-9
Arpc1b	6.9271e-92	0.889807	0.669	0.112	1.52112e-87	DsRed-9
Gng5	3.52475e-50	0.889123	1	0.888	7.74001e-46	DsRed-9
Ctsb	2.50434e-12	0.888582	0.887	0.727	5.49927e-08	DsRed-9
Grn	1.01502e-51	0.882863	0.789	0.28	2.22888e-47	DsRed-9
Gpx7	6.62063e-76	0.874476	0.774	0.215	1.45382e-71	DsRed-9
Serf2	5.89757e-55	0.863005	1	0.969	1.29505e-50	DsRed-9
Cmtm3	1.1291e-199	0.861425	0.789	0.072	2.47939e-195	DsRed-9
Ccnd3	4.12888e-95	0.860024	0.812	0.184	9.06661e-91	DsRed-9
Mt1	1.56298e-28	0.858113	0.624	0.235	3.43215e-24	DsRed-9
Bcan	2.6223e-08	0.855957	0.128	0.037	0.00057583	DsRed-9
1810058I24Rik	6.65834e-34	0.84718	0.932	0.769	1.46211e-29	DsRed-9
Col18a1	2.00444e-141	0.84603	0.511	0.039	4.40156e-137	DsRed-9
Ramp2	8.98564e-88	0.844547	0.504	0.064	1.97316e-83	DsRed-9
Phlda1	1.69627e-23	0.843905	0.774	0.463	3.72485e-19	DsRed-9
Fcrls	0.00356688	0.842997	0.113	0.057	1	DsRed-9
Lgmn	0.00256604	0.838107	0.526	0.432	1	DsRed-9
Cdkn1c	9.95033e-15	0.836569	0.797	0.598	2.18499e-10	DsRed-9
Slc9a3r1	7.55855e-198	0.836058	0.774	0.066	1.65978e-193	DsRed-9
Crip1	1.09589e-58	0.833625	0.647	0.164	2.40647e-54	DsRed-9
Tubb6	4.50368e-288	0.833379	0.564	0.019	9.88962e-284	DsRed-9
Nid1	0	0.830904	0.722	0.015	0	DsRed-9
Itih5	0	0.826316	0.564	0.008	0	DsRed-9
Cenpa	4.16286e-66	0.825644	0.421	0.058	9.14123e-62	DsRed-9
Col6a1	5.89184e-283	0.824702	0.609	0.023	1.29379e-278	DsRed-9
Tbx18	0	0.824612	0.669	0.004	0	DsRed-9
Timp3	3.51952e-115	0.824151	0.624	0.079	7.72851e-111	DsRed-9
Cldn11	2.03565e-160	0.822976	0.466	0.027	4.47008e-156	DsRed-9
Id1	7.44843e-120	0.821959	0.662	0.086	1.6356e-115	DsRed-9
Cd81	6.21095e-23	0.811822	0.947	0.897	1.36386e-18	DsRed-9
Tmem132c	1.62622e-104	0.809212	0.654	0.101	3.57101e-100	DsRed-9
Lhfp	2.43248e-255	0.8092	0.752	0.046	5.34148e-251	DsRed-9
Pcolce	2.8262e-257	0.807304	0.594	0.025	6.20606e-253	DsRed-9
Rrbp1	3.54064e-59	0.806615	0.887	0.381	7.77489e-55	DsRed-9
B2m	9.82862e-75	0.801329	0.812	0.212	2.15827e-70	DsRed-9
Emp1	0	0.798414	0.639	0.012	0	DsRed-9
Mrc1	2.49465e-23	0.79548	0.12	0.013	5.478e-19	DsRed-9
Col5a2	0	0.790281	0.684	0.026	0	DsRed-9
Nr2f1	7.52108e-77	0.78976	0.752	0.158	1.65155e-72	DsRed-9
Foxd1	0	0.784385	0.624	0.021	0	DsRed-9
Eef1d	4.45701e-46	0.782232	0.992	0.757	9.78715e-42	DsRed-9
P4hb	1.70882e-42	0.781171	0.872	0.586	3.75239e-38	DsRed-9
Qk	3.57015e-32	0.780227	0.737	0.324	7.8397e-28	DsRed-9
Txndc5	7.17216e-54	0.777184	0.88	0.44	1.57494e-49	DsRed-9
Epha7	1.47537e-54	0.774126	0.662	0.183	3.23976e-50	DsRed-9
Ctsz	4.75734e-41	0.772607	0.827	0.363	1.04467e-36	DsRed-9
Ost4	1.40747e-46	0.762424	0.955	0.728	3.09067e-42	DsRed-9
Siva1	7.11455e-50	0.756425	0.835	0.376	1.56228e-45	DsRed-9
Tpm1	3.11691e-23	0.754197	0.835	0.631	6.84441e-19	DsRed-9
Pdia6	1.87689e-30	0.75161	0.925	0.765	4.12146e-26	DsRed-9
Ctsc	2.85545e-47	0.743957	0.226	0.022	6.27027e-43	DsRed-9
Ostf1	7.60461e-55	0.743014	0.805	0.286	1.6699e-50	DsRed-9
Copz2	0	0.741866	0.714	0.018	0	DsRed-9
Pla2g7	1.5799e-18	0.741703	0.211	0.047	3.4693e-14	DsRed-9
Itm2b	1.67274e-24	0.74001	0.985	0.881	3.67316e-20	DsRed-9
Plat	2.69788e-104	0.738717	0.639	0.088	5.92427e-100	DsRed-9
Slc4a4	1.67827e-29	0.737957	0.188	0.025	3.68531e-25	DsRed-9
Nid2	2.95994e-280	0.736462	0.504	0.014	6.49972e-276	DsRed-9
Col6a2	1.09752e-208	0.732156	0.632	0.04	2.41004e-204	DsRed-9
Cdh11	1.2535e-65	0.731625	0.722	0.194	2.75256e-61	DsRed-9
Smc4	2.40778e-78	0.730968	0.684	0.145	5.28725e-74	DsRed-9
Cdk1	3.31665e-250	0.729717	0.534	0.02	7.28304e-246	DsRed-9
Gm3764	0.00024249	0.725871	0.135	0.063	1	DsRed-9
Anp32b	1.16856e-27	0.724838	0.895	0.842	2.56605e-23	DsRed-9
Efemp2	4.07365e-194	0.714622	0.767	0.069	8.94532e-190	DsRed-9
Hadh	1.36246e-134	0.712948	0.789	0.111	2.99184e-130	DsRed-9
Rhoj	0	0.711841	0.617	0.01	0	DsRed-9
Zfp36l2	9.37482e-132	0.710862	0.782	0.11	2.05862e-127	DsRed-9
Arhgap29	0	0.709385	0.639	0.021	0	DsRed-9
Jun	1.80421e-21	0.702789	0.88	0.573	3.96187e-17	DsRed-9
Rcn1	2.0362e-41	0.700167	0.82	0.406	4.47129e-37	DsRed-9
Col23a1	4.04603e-180	0.699377	0.647	0.05	8.88468e-176	DsRed-9
Ccnd1	5.21998e-146	0.69855	0.534	0.04	1.14626e-141	DsRed-9
Nr2f2	2.66281e-53	0.695103	0.759	0.22	5.84727e-49	DsRed-9
Rps20	6.46614e-47	0.69342	1	0.995	1.4199e-42	DsRed-9
Pfn1	1.64337e-38	0.690621	0.992	0.987	3.60868e-34	DsRed-9
Gatm	3.87889e-42	0.688407	0.639	0.213	8.51766e-38	DsRed-9
Prrx1	0	0.685321	0.647	0.006	0	DsRed-9
Sat1	3.65848e-23	0.684681	0.684	0.371	8.03366e-19	DsRed-9
Vamp8	8.7556e-131	0.684606	0.489	0.038	1.92264e-126	DsRed-9
H2afz	2.59052e-18	0.684591	0.992	0.996	5.68852e-14	DsRed-9
Abracl	7.1849e-40	0.684314	0.872	0.484	1.57773e-35	DsRed-9
Mmp2	1.90506e-203	0.67821	0.594	0.035	4.18332e-199	DsRed-9
Osr1	0	0.677273	0.526	0.003	0	DsRed-9
Aqp4	8.08066e-21	0.675877	0.113	0.013	1.77443e-16	DsRed-9
Hnrnpf	2.36464e-37	0.673428	0.955	0.882	5.19252e-33	DsRed-9
Foxc1	0	0.671117	0.624	0.008	0	DsRed-9
Bmp7	2.62385e-38	0.671066	0.617	0.188	5.76171e-34	DsRed-9
Ccna2	1.99693e-144	0.670335	0.451	0.029	4.38506e-140	DsRed-9
Fkbp9	1.2482e-188	0.669984	0.707	0.058	2.74091e-184	DsRed-9
Rplp1	3.02658e-44	0.661499	1	0.998	6.64607e-40	DsRed-9
Angptl4	0	0.66097	0.654	0.022	0	DsRed-9
Msx1	1.18553e-291	0.649757	0.496	0.012	2.60331e-287	DsRed-9
Twist1	0	0.649569	0.571	0.011	0	DsRed-9
H2afx	7.30932e-10	0.648402	0.797	0.711	1.60505e-05	DsRed-9
Rdh10	1.47265e-71	0.647501	0.526	0.086	3.2338e-67	DsRed-9
Fkbp10	0	0.643268	0.617	0.01	0	DsRed-9
Trf	1.36363e-26	0.641806	0.338	0.082	2.99439e-22	DsRed-9
H1f0	4.14558e-15	0.64145	0.88	0.701	9.10327e-11	DsRed-9
Tcf4	3.74209e-35	0.641199	0.917	0.531	8.21726e-31	DsRed-9
Htra1	5.66561e-42	0.639291	0.18	0.016	1.24411e-37	DsRed-9
Ctsd	1.81941e-10	0.639267	0.842	0.662	3.99524e-06	DsRed-9
Ier2	1.41135e-30	0.638896	0.744	0.323	3.09918e-26	DsRed-9
Sox9	1.02225e-57	0.638572	0.436	0.071	2.24477e-53	DsRed-9
Blvrb	9.94036e-87	0.637612	0.647	0.11	2.1828e-82	DsRed-9
Pdlim2	1.20718e-209	0.63394	0.579	0.031	2.65085e-205	DsRed-9
Rps27l	3.19502e-36	0.631644	0.97	0.895	7.01595e-32	DsRed-9
Phgdh	5.6727e-71	0.621719	0.526	0.084	1.24567e-66	DsRed-9
Lamp2	7.12752e-52	0.62032	0.827	0.295	1.56513e-47	DsRed-9
Lpar1	1.28359e-80	0.619558	0.677	0.123	2.81864e-76	DsRed-9
Npc2	3.02385e-35	0.61954	0.97	0.832	6.64008e-31	DsRed-9
Lmo4	3.75867e-44	0.619103	0.835	0.336	8.25367e-40	DsRed-9
Kdelr2	3.72344e-31	0.618736	0.88	0.588	8.1763e-27	DsRed-9
Lyz2	1.69939e-07	0.614958	0.105	0.028	0.00373168	DsRed-9
Svil	1.27432e-153	0.614234	0.496	0.033	2.79829e-149	DsRed-9
Myl9	2.17103e-162	0.613462	0.556	0.04	4.76735e-158	DsRed-9
Stab1	1.45978e-06	0.612794	0.143	0.051	0.0320554	DsRed-9
Gpr37l1	1.71894e-27	0.612585	0.113	0.01	3.77462e-23	DsRed-9
Csf1r	0.00554304	0.612279	0.105	0.053	1	DsRed-9
Ccnd2	3.94576e-151	0.61219	0.579	0.046	8.66449e-147	DsRed-9
Rps12	1.34695e-40	0.612129	1	0.993	2.95776e-36	DsRed-9
Pmp22	3.36608e-117	0.610931	0.639	0.079	7.39158e-113	DsRed-9
Prrx2	0	0.608057	0.534	0.005	0	DsRed-9
Grb10	8.56105e-24	0.60682	0.805	0.575	1.87992e-19	DsRed-9
Vamp5	6.59437e-167	0.604164	0.271	0.006	1.44806e-162	DsRed-9
Tpst1	1.01984e-32	0.6024	0.707	0.317	2.23946e-28	DsRed-9
Cmtm7	6.33382e-120	0.599944	0.692	0.088	1.39084e-115	DsRed-9
Cdca8	2.78825e-59	0.59903	0.466	0.082	6.12272e-55	DsRed-9
Slc3a2	4.02953e-19	0.598779	0.759	0.49	8.84844e-15	DsRed-9
Raly	1.55864e-30	0.598655	0.947	0.902	3.42262e-26	DsRed-9
Gng12	4.51835e-117	0.598487	0.669	0.09	9.92185e-113	DsRed-9
Akap12	4.27234e-25	0.597553	0.767	0.459	9.38162e-21	DsRed-9
Tgfb1i1	3.52368e-51	0.595469	0.714	0.227	7.73765e-47	DsRed-9
Ptbp1	3.04554e-46	0.592982	0.774	0.311	6.68769e-42	DsRed-9
Tcf3	1.6127e-34	0.591389	0.85	0.483	3.54133e-30	DsRed-9
Hes5	4.20171e-10	0.590233	0.128	0.031	9.22653e-06	DsRed-9
Hmga2	4.43293e-197	0.590093	0.383	0.012	9.73428e-193	DsRed-9
Prdx1	5.36708e-34	0.588684	0.977	0.907	1.17856e-29	DsRed-9
Rbms1	1.76863e-31	0.58858	0.805	0.461	3.88374e-27	DsRed-9
Serp1	7.66323e-32	0.588525	0.835	0.538	1.68277e-27	DsRed-9
Igf1	8.67168e-175	0.586573	0.504	0.028	1.90421e-170	DsRed-9
Nap1l1	1.31199e-30	0.585415	0.97	0.958	2.881e-26	DsRed-9
Cdc20	6.64811e-122	0.584775	0.398	0.026	1.45986e-117	DsRed-9
Cavin3	1.38881e-51	0.584241	0.669	0.199	3.04968e-47	DsRed-9
Heyl	0	0.579546	0.526	0.006	0	DsRed-9
Tpm2	1.57626e-137	0.579396	0.602	0.056	3.4613e-133	DsRed-9
Zic4	9.15184e-85	0.577654	0.654	0.101	2.00965e-80	DsRed-9
Rsu1	1.33994e-53	0.577419	0.857	0.348	2.94238e-49	DsRed-9
Rpl22	7.12766e-41	0.577276	0.97	0.975	1.56516e-36	DsRed-9
Cfh	7.84999e-117	0.575029	0.376	0.024	1.72378e-112	DsRed-9
Rrm2	2.09282e-74	0.574269	0.466	0.063	4.59562e-70	DsRed-9
Cebpb	1.47123e-18	0.57398	0.398	0.148	3.23067e-14	DsRed-9
Parm1	1.69621e-41	0.572635	0.534	0.148	3.7247e-37	DsRed-9
Hmgb1	2.77599e-22	0.568956	0.992	0.995	6.0958e-18	DsRed-9
Vcam1	0	0.564671	0.481	0.008	0	DsRed-9
Lamb1	4.19799e-236	0.562996	0.474	0.016	9.21837e-232	DsRed-9
Cdc42ep5	1.23375e-135	0.562941	0.594	0.058	2.7092e-131	DsRed-9
Hspa5	1.295e-19	0.562921	0.97	0.808	2.84369e-15	DsRed-9
Ngfr	1.41486e-63	0.562586	0.496	0.08	3.10689e-59	DsRed-9
Galk1	1.14951e-49	0.562111	0.699	0.235	2.5242e-45	DsRed-9
Tpbg	5.30048e-56	0.561764	0.541	0.109	1.16393e-51	DsRed-9
Flna	1.33656e-63	0.561662	0.759	0.223	2.93495e-59	DsRed-9
Acot1	7.99979e-65	0.561034	0.398	0.052	1.75667e-60	DsRed-9
Cd248	0	0.560992	0.564	0.007	0	DsRed-9
Ssr2	2.16341e-30	0.560138	0.962	0.833	4.75062e-26	DsRed-9
Il11ra1	6.79524e-75	0.557147	0.707	0.157	1.49217e-70	DsRed-9
Eif4ebp1	9.61395e-76	0.556671	0.669	0.136	2.11113e-71	DsRed-9
Idh2	3.12187e-27	0.555434	0.902	0.691	6.85532e-23	DsRed-9
Dek	1.38989e-21	0.551816	0.812	0.621	3.05207e-17	DsRed-9
Tnfaip8	0	0.551318	0.669	0.022	0	DsRed-9
Cd302	3.34893e-118	0.550507	0.669	0.087	7.35392e-114	DsRed-9
Ostc	4.12348e-25	0.549941	0.932	0.859	9.05474e-21	DsRed-9
Maf	2.60221e-43	0.548976	0.459	0.097	5.7142e-39	DsRed-9
Serpine2	3.50772e-06	0.548711	0.549	0.342	0.0770261	DsRed-9
Ifitm3	0	0.548581	0.474	0.007	0	DsRed-9
Lamc3	0	0.548053	0.609	0.006	0	DsRed-9
Csrp1	2.06399e-137	0.548052	0.654	0.069	4.53232e-133	DsRed-9
Sfrp1	4.82829e-53	0.547519	0.579	0.138	1.06024e-48	DsRed-9
Ctss	0.00173932	0.547374	0.113	0.053	1	DsRed-9
Ptk7	6.22159e-69	0.54534	0.684	0.156	1.3662e-64	DsRed-9
Fth1	6.78625e-37	0.540983	1	0.997	1.49019e-32	DsRed-9
Col5a1	0	0.540958	0.564	0.008	0	DsRed-9
Snx5	7.55281e-34	0.53909	0.88	0.476	1.65852e-29	DsRed-9
Nkain4	4.77296e-20	0.537282	0.549	0.236	1.0481e-15	DsRed-9
Bst2	2.13907e-31	0.537174	0.248	0.04	4.69718e-27	DsRed-9
Add3	1.01877e-40	0.537019	0.744	0.278	2.23712e-36	DsRed-9
Glul	2.62454e-19	0.536336	0.797	0.478	5.76322e-15	DsRed-9
Rpl28	2.51617e-42	0.535823	1	0.998	5.52525e-38	DsRed-9
Tfpi	4.00931e-110	0.535359	0.526	0.055	8.80403e-106	DsRed-9
Ifitm1	1.69713e-305	0.535203	0.398	0.006	3.72673e-301	DsRed-9
Cdk4	6.93047e-22	0.534441	0.955	0.933	1.52186e-17	DsRed-9
Tmem100	1.19479e-153	0.534135	0.511	0.035	2.62364e-149	DsRed-9
Ccnb1	7.40756e-196	0.533781	0.406	0.014	1.62663e-191	DsRed-9
Bcl7c	7.25304e-34	0.533443	0.895	0.595	1.59269e-29	DsRed-9
Gsn	3.11703e-57	0.533159	0.647	0.151	6.84469e-53	DsRed-9
Cstb	5.38589e-27	0.531216	0.872	0.6	1.18269e-22	DsRed-9
Itm2a	1.21647e-56	0.530583	0.549	0.113	2.67126e-52	DsRed-9
Rpl13	3.44392e-40	0.528165	1	0.999	7.56251e-36	DsRed-9
Hmgn2	1.67936e-19	0.52554	0.97	0.917	3.68771e-15	DsRed-9
Cdca3	1.88459e-91	0.523921	0.383	0.034	4.13838e-87	DsRed-9
Tnfrsf1a	6.1415e-232	0.52288	0.654	0.036	1.34861e-227	DsRed-9
Lamp1	3.18883e-17	0.521948	0.97	0.915	7.00234e-13	DsRed-9
Aebp1	0	0.518641	0.526	0.012	0	DsRed-9
Lsm2	1.74609e-21	0.516915	0.797	0.654	3.83424e-17	DsRed-9
Hbb-y	1.92057e-09	0.516202	0.684	0.469	4.21738e-05	DsRed-9
Laptm5	5.09562e-07	0.514792	0.135	0.045	0.0111895	DsRed-9
Etfb	9.59888e-28	0.514633	0.895	0.62	2.10782e-23	DsRed-9
Itgb5	2.0579e-177	0.514271	0.556	0.034	4.51895e-173	DsRed-9
Mmp14	7.51121e-164	0.51405	0.632	0.051	1.64939e-159	DsRed-9
Gadd45b	4.31423e-75	0.51317	0.496	0.071	9.47363e-71	DsRed-9
Gng11	9.93637e-305	0.512895	0.556	0.016	2.18193e-300	DsRed-9
Nfia	2.16721e-57	0.51267	0.556	0.108	4.75897e-53	DsRed-9
Hsp90b1	4.85865e-20	0.511815	0.977	0.817	1.06691e-15	DsRed-9
Rps4x	1.92243e-41	0.51081	1	0.998	4.22147e-37	DsRed-9
Calu	4.44288e-38	0.510231	0.85	0.425	9.75612e-34	DsRed-9
Zeb2	1.07907e-65	0.508023	0.504	0.08	2.36953e-61	DsRed-9
Tipin	4.48832e-24	0.507431	0.677	0.345	9.85591e-20	DsRed-9
Emilin1	5.00964e-229	0.507326	0.564	0.026	1.10007e-224	DsRed-9
Cd9	8.79541e-12	0.506783	0.286	0.108	1.93138e-07	DsRed-9
Npm1	5.20923e-22	0.506557	0.977	0.996	1.1439e-17	DsRed-9
Rnase4	5.35295e-51	0.505174	0.398	0.065	1.17545e-46	DsRed-9
Cyr61	2.49705e-205	0.505154	0.391	0.012	5.48327e-201	DsRed-9
Pdgfrb	0	0.504293	0.586	0.006	0	DsRed-9
Loxl1	5.21245e-259	0.502444	0.586	0.024	1.1446e-254	DsRed-9
Cnn3	5.73975e-20	0.500882	0.842	0.509	1.26039e-15	DsRed-9
Rpl12	1.07506e-27	0.499519	0.992	0.986	2.36073e-23	DsRed-9
Nfkbia	0.000224692	0.499462	0.549	0.4	1	DsRed-9
Dap	5.49512e-44	0.499042	0.774	0.288	1.20667e-39	DsRed-9
Pimreg	4.54811e-55	0.498451	0.406	0.065	9.9872e-51	DsRed-9
Hexa	1.05453e-17	0.495335	0.774	0.46	2.31564e-13	DsRed-9
Col2a1	2.83372e-51	0.495219	0.496	0.095	6.22257e-47	DsRed-9
Acadl	1.01589e-75	0.492216	0.684	0.14	2.23078e-71	DsRed-9
Gmnn	5.83016e-58	0.492174	0.556	0.122	1.28024e-53	DsRed-9
Tmed10	2.35828e-31	0.492157	0.97	0.799	5.17855e-27	DsRed-9
Cd164	2.02832e-62	0.491978	0.752	0.2	4.45398e-58	DsRed-9
Oat	3.18538e-38	0.489351	0.835	0.398	6.99478e-34	DsRed-9
Pdia3	1.22396e-23	0.488693	0.97	0.87	2.68769e-19	DsRed-9
Tnfrsf19	3.86607e-90	0.488638	0.632	0.094	8.4895e-86	DsRed-9
Spc25	2.89891e-177	0.488574	0.421	0.018	6.36571e-173	DsRed-9
Limd2	9.99967e-23	0.487773	0.872	0.774	2.19583e-18	DsRed-9
Wdr86	0	0.487236	0.526	0.01	0	DsRed-9
Atp6v0e	2.09955e-30	0.486592	0.895	0.473	4.61041e-26	DsRed-9
Cenpf	2.24771e-82	0.486552	0.361	0.033	4.93575e-78	DsRed-9
Anp32a	8.33238e-25	0.48518	0.955	0.828	1.82971e-20	DsRed-9
Nfib	1.16817e-42	0.483974	0.481	0.101	2.56518e-38	DsRed-9
Tmem167	2.99941e-24	0.483198	0.94	0.836	6.58641e-20	DsRed-9
Fam174b	2.5429e-21	0.482755	0.684	0.392	5.58395e-17	DsRed-9
Fn1	4.13632e-186	0.482353	0.489	0.024	9.08295e-182	DsRed-9
Ramp1	5.37647e-23	0.48045	0.173	0.027	1.18062e-18	DsRed-9
Rab34	1.65971e-30	0.480026	0.789	0.413	3.64457e-26	DsRed-9
Pofut2	4.7896e-26	0.479903	0.805	0.488	1.05175e-21	DsRed-9
Rps15a	1.16185e-33	0.479789	1	0.998	2.5513e-29	DsRed-9
Ssr3	8.28248e-29	0.478803	0.925	0.76	1.81875e-24	DsRed-9
Hmg20b	1.48542e-47	0.478344	0.767	0.258	3.26183e-43	DsRed-9
Pdgfra	0	0.478033	0.504	0.007	0	DsRed-9
Ahnak	2.74725e-298	0.477061	0.579	0.019	6.03269e-294	DsRed-9
Rab3il1	6.38968e-64	0.474476	0.662	0.145	1.40311e-59	DsRed-9
Gramd3	0	0.474263	0.556	0.013	0	DsRed-9
Rpl10a	4.8257e-32	0.473314	0.985	0.997	1.05967e-27	DsRed-9
Rps18	3.20029e-28	0.472853	0.992	0.998	7.02751e-24	DsRed-9
Rpl36a	1.10572e-27	0.472277	0.97	0.991	2.42805e-23	DsRed-9
Sec61b	7.89988e-23	0.47085	0.962	0.963	1.73473e-18	DsRed-9
Ptgis	2.9526e-200	0.470576	0.534	0.028	6.48361e-196	DsRed-9
Spc24	2.23069e-135	0.46922	0.466	0.033	4.89838e-131	DsRed-9
Rps9	2.30647e-35	0.468365	1	0.997	5.06477e-31	DsRed-9
Tuba1b	7.12705e-11	0.466348	0.947	0.977	1.56503e-06	DsRed-9
Clic4	1.94261e-57	0.466176	0.767	0.21	4.26578e-53	DsRed-9
Rplp0	2.06759e-34	0.465852	1	0.998	4.54021e-30	DsRed-9
Snx3	2.03823e-19	0.464629	0.977	0.833	4.47576e-15	DsRed-9
Ctdsp1	2.33996e-221	0.464114	0.662	0.039	5.13833e-217	DsRed-9
Nde1	2.62067e-133	0.463724	0.519	0.042	5.75474e-129	DsRed-9
Sri	3.97013e-21	0.462459	0.842	0.624	8.71801e-17	DsRed-9
Ak3	1.16859e-35	0.462389	0.767	0.35	2.56611e-31	DsRed-9
Txnip	3.49467e-30	0.462052	0.406	0.102	7.67394e-26	DsRed-9
Rpn2	2.6898e-21	0.461935	0.91	0.74	5.90652e-17	DsRed-9
Yap1	0	0.461836	0.602	0.007	0	DsRed-9
Edn3	0	0.461808	0.474	0.003	0	DsRed-9
Calr	1.41489e-16	0.46038	0.985	0.919	3.10696e-12	DsRed-9
Mdfi	1.13404e-218	0.459319	0.526	0.023	2.49024e-214	DsRed-9
Nudt4	2.05334e-16	0.458573	0.782	0.553	4.50893e-12	DsRed-9
Rhoa	1.65057e-21	0.457492	0.97	0.874	3.62449e-17	DsRed-9
Tcn2	9.11675e-97	0.457287	0.541	0.065	2.00195e-92	DsRed-9
Tm4sf1	0	0.456158	0.361	0.003	0	DsRed-9
Mki67	9.89623e-102	0.455998	0.383	0.03	2.17311e-97	DsRed-9
Tmpo	4.04529e-16	0.455804	0.827	0.651	8.88305e-12	DsRed-9
Tgm2	2.02888e-270	0.455096	0.368	0.006	4.45521e-266	DsRed-9
Frzb	2.5195e-134	0.455013	0.474	0.033	5.53257e-130	DsRed-9
Lrrc17	8.80574e-288	0.454051	0.474	0.011	1.93365e-283	DsRed-9
Pdlim4	3.67019e-133	0.453948	0.571	0.05	8.05938e-129	DsRed-9
Snx2	0.00289509	0.453727	0.647	0.528	1	DsRed-9
Ccnb2	9.06371e-61	0.453706	0.376	0.05	1.9903e-56	DsRed-9
Tcf12	9.80622e-24	0.453102	0.812	0.515	2.15335e-19	DsRed-9
Rpl7	8.25133e-29	0.452376	0.992	0.997	1.81191e-24	DsRed-9
Atf3	6.90698e-19	0.450864	0.195	0.04	1.5167e-14	DsRed-9
Kdelr1	2.49265e-21	0.450679	0.91	0.801	5.47362e-17	DsRed-9
Krtcap2	5.74718e-28	0.449764	0.962	0.895	1.26202e-23	DsRed-9
Magt1	1.60556e-64	0.449578	0.609	0.129	3.52564e-60	DsRed-9
Srsf9	2.57172e-24	0.449446	0.887	0.597	5.64723e-20	DsRed-9
Sdc2	4.93658e-35	0.448685	0.677	0.256	1.08402e-30	DsRed-9
Ctdsp2	5.84739e-61	0.448536	0.752	0.199	1.28403e-56	DsRed-9
Acaa2	1.5091e-39	0.446666	0.632	0.209	3.31383e-35	DsRed-9
Slc29a1	1.46348e-50	0.446267	0.459	0.09	3.21366e-46	DsRed-9
Hmgn1	1.46798e-16	0.446223	0.977	0.993	3.22354e-12	DsRed-9
Pcca	7.3309e-54	0.445153	0.669	0.189	1.60979e-49	DsRed-9
Serpinb6a	5.35369e-28	0.444419	0.722	0.343	1.17562e-23	DsRed-9
Nupr1	1.30484e-184	0.444359	0.301	0.007	2.8653e-180	DsRed-9
Sh3bgrl3	3.04303e-19	0.443553	0.947	0.913	6.68219e-15	DsRed-9
Tpx2	3.78812e-135	0.443101	0.383	0.021	8.31832e-131	DsRed-9
Tsc22d4	1.06474e-24	0.44304	0.692	0.32	2.33805e-20	DsRed-9
Tmem165	7.91816e-28	0.44247	0.865	0.574	1.73875e-23	DsRed-9
Rest	2.62172e-281	0.441296	0.617	0.024	5.75704e-277	DsRed-9
Crtap	1.14399e-145	0.441038	0.564	0.047	2.51209e-141	DsRed-9
Cped1	0	0.440981	0.594	0.01	0	DsRed-9
P3h3	1.25605e-27	0.440605	0.571	0.212	2.75816e-23	DsRed-9
Ldha	5.17737e-15	0.440429	0.917	0.787	1.1369e-10	DsRed-9
Fam212a	1.33052e-67	0.439559	0.526	0.09	2.92169e-63	DsRed-9
Mgst1	1.03695e-114	0.439324	0.421	0.031	2.27704e-110	DsRed-9
Zcchc24	0	0.439009	0.594	0.008	0	DsRed-9
Rps29	5.08748e-35	0.438732	1	0.999	1.11716e-30	DsRed-9
Rpl14	1.75582e-22	0.438484	1	0.998	3.85561e-18	DsRed-9
Rps3a1	3.8876e-37	0.438139	1	0.998	8.53679e-33	DsRed-9
Notch2	3.05174e-207	0.436899	0.519	0.024	6.70132e-203	DsRed-9
Rps23	5.17003e-26	0.436878	1	0.997	1.13529e-21	DsRed-9
Npl	2.03735e-09	0.436833	0.218	0.08	4.47383e-05	DsRed-9
Selenos	3.29529e-18	0.436789	0.895	0.637	7.23612e-14	DsRed-9
Gins2	8.15203e-96	0.435818	0.526	0.064	1.7901e-91	DsRed-9
Col9a1	3.19306e-119	0.435778	0.406	0.028	7.01164e-115	DsRed-9
Bicc1	1.42134e-89	0.434409	0.489	0.058	3.12111e-85	DsRed-9
Rpl23a	4.07484e-18	0.432068	0.985	0.991	8.94795e-14	DsRed-9
Tpcn1	1.28946e-147	0.431607	0.571	0.046	2.83152e-143	DsRed-9
Ninj1	3.16843e-17	0.431568	0.481	0.207	6.95755e-13	DsRed-9
Zfyve21	4.77376e-95	0.431265	0.609	0.085	1.04827e-90	DsRed-9
S100a13	3.73281e-150	0.431253	0.564	0.044	8.19688e-146	DsRed-9
Pth1r	2.15272e-87	0.430994	0.556	0.077	4.72717e-83	DsRed-9
Ctsa	2.88386e-06	0.42942	0.526	0.381	0.0633268	DsRed-9
Tyms	4.6389e-42	0.427935	0.549	0.143	1.01866e-37	DsRed-9
Cx3cr1	2.00958e-08	0.427538	0.128	0.036	0.000441283	DsRed-9
Olig1	3.82414e-43	0.427533	0.128	0.007	8.39742e-39	DsRed-9
Ptpn18	1.08575e-11	0.427019	0.188	0.054	2.38419e-07	DsRed-9
Slc41a1	1.44144e-58	0.425718	0.504	0.095	3.16526e-54	DsRed-9
Rps16	3.0022e-33	0.425339	1	0.997	6.59253e-29	DsRed-9
Anxa3	8.94949e-107	0.425164	0.444	0.038	1.96522e-102	DsRed-9
Wasf2	6.42385e-55	0.424736	0.609	0.142	1.41061e-50	DsRed-9
Elovl1	2.72871e-66	0.423676	0.662	0.141	5.99197e-62	DsRed-9
Mt2	4.12316e-39	0.423538	0.511	0.131	9.05405e-35	DsRed-9
Tram1	8.15803e-36	0.423034	0.789	0.367	1.79142e-31	DsRed-9
S1pr3	7.77431e-277	0.422613	0.541	0.018	1.70716e-272	DsRed-9
Ctnna1	4.74319e-44	0.421316	0.729	0.23	1.04156e-39	DsRed-9
Ddost	3.02406e-19	0.420998	0.925	0.766	6.64054e-15	DsRed-9
Ctsl	0.000244794	0.420288	0.857	0.751	1	DsRed-9
Vcan	8.61538e-19	0.419405	0.729	0.391	1.89185e-14	DsRed-9
Aurkb	1.95896e-280	0.419048	0.414	0.008	4.30169e-276	DsRed-9
Serinc3	3.4189e-05	0.418569	0.82	0.676	0.750756	DsRed-9
Gsta4	1.16306e-104	0.418502	0.368	0.026	2.55397e-100	DsRed-9
Nrarp	7.20989e-42	0.418311	0.293	0.042	1.58322e-37	DsRed-9
Smo	9.58776e-108	0.416638	0.624	0.076	2.10538e-103	DsRed-9
Foxp1	1.04522e-18	0.415861	0.805	0.536	2.2952e-14	DsRed-9
Snap23	1.45007e-92	0.415776	0.609	0.089	3.18421e-88	DsRed-9
F3	3.08531e-28	0.414241	0.195	0.028	6.77503e-24	DsRed-9
Rps11	2.62906e-30	0.41283	1	0.998	5.77315e-26	DsRed-9
Rps15	8.79759e-18	0.412213	0.977	0.995	1.93186e-13	DsRed-9
Axin2	6.57949e-64	0.41067	0.624	0.131	1.44479e-59	DsRed-9
Gjb6	8.42874e-140	0.410491	0.226	0.005	1.85087e-135	DsRed-9
Id2	1.84223e-06	0.410257	0.541	0.358	0.0404536	DsRed-9
Eci2	3.00815e-22	0.410208	0.91	0.637	6.6056e-18	DsRed-9
Rrm1	5.10176e-28	0.409894	0.534	0.188	1.12029e-23	DsRed-9
Eif1ax	3.8837e-17	0.40882	0.88	0.71	8.52822e-13	DsRed-9
Rpl18a	1.83935e-26	0.408017	1	0.999	4.03902e-22	DsRed-9
Hgsnat	1.65389e-16	0.408005	0.436	0.172	3.63178e-12	DsRed-9
Cpq	2.15466e-52	0.407984	0.579	0.132	4.73143e-48	DsRed-9
Cyfip1	8.45904e-31	0.406842	0.594	0.21	1.85752e-26	DsRed-9
Nusap1	2.06534e-140	0.405891	0.353	0.016	4.53529e-136	DsRed-9
Rps8	1.01411e-25	0.405292	0.992	0.999	2.22689e-21	DsRed-9
Rps27a	6.71102e-33	0.404804	1	0.999	1.47367e-28	DsRed-9
Cenpe	1.2477e-107	0.404635	0.331	0.02	2.73983e-103	DsRed-9
Wwtr1	0	0.404437	0.526	0.01	0	DsRed-9
Pcdh18	3.89879e-115	0.404229	0.534	0.055	8.56136e-111	DsRed-9
Pxdc1	7.99563e-205	0.403158	0.316	0.006	1.75576e-200	DsRed-9
Arhgap31	4.38529e-145	0.401436	0.632	0.059	9.62966e-141	DsRed-9
Csrp2	1.67965e-10	0.401306	0.767	0.67	3.68834e-06	DsRed-9
Rnf130	8.29909e-17	0.401158	0.564	0.272	1.8224e-12	DsRed-9
Nkd2	1.43041e-70	0.400918	0.534	0.088	3.14105e-66	DsRed-9
Nrep	8.82882e-12	0.400544	0.835	0.738	1.93872e-07	DsRed-9
Dtymk	1.30803e-14	0.40011	0.805	0.63	2.8723e-10	DsRed-9
Scube1	7.19285e-32	0.39976	0.534	0.164	1.57948e-27	DsRed-9
Rpl8	4.56258e-27	0.398891	1	0.999	1.0019e-22	DsRed-9
Mlc1	8.26756e-39	0.3988	0.128	0.008	1.81547e-34	DsRed-9
Ilk	6.86437e-19	0.398148	0.857	0.644	1.50735e-14	DsRed-9
Mcm5	8.68528e-84	0.397723	0.429	0.047	1.9072e-79	DsRed-9
Hdlbp	1.12774e-24	0.397252	0.782	0.451	2.47641e-20	DsRed-9
Klf13	5.83987e-16	0.396814	0.812	0.565	1.28238e-11	DsRed-9
Slc38a3	1.81509e-255	0.396755	0.414	0.009	3.98576e-251	DsRed-9
Hexb	9.12211e-12	0.396156	0.466	0.231	2.00312e-07	DsRed-9
Rps5	2.62223e-26	0.395699	1	0.999	5.75815e-22	DsRed-9
Glipr2	3.22552e-31	0.395293	0.624	0.223	7.08293e-27	DsRed-9
Tmem176a	3.40334e-18	0.395287	0.752	0.411	7.4734e-14	DsRed-9
Trip6	1.15756e-132	0.395144	0.534	0.046	2.5419e-128	DsRed-9
Gmds	1.98343e-25	0.394218	0.647	0.308	4.35541e-21	DsRed-9
Zfp36	3.48629e-23	0.393784	0.218	0.04	7.65554e-19	DsRed-9
Fzd2	3.50046e-160	0.393692	0.436	0.022	7.68665e-156	DsRed-9
Stra6	1.32764e-46	0.393137	0.286	0.037	2.91537e-42	DsRed-9
Glmp	7.93603e-45	0.393121	0.722	0.226	1.74267e-40	DsRed-9
Gltp	1.68118e-39	0.392992	0.647	0.203	3.69171e-35	DsRed-9
Zyx	9.65298e-28	0.392943	0.759	0.367	2.1197e-23	DsRed-9
Tax1bp3	1.49751e-16	0.392917	0.857	0.597	3.28838e-12	DsRed-9
Smc2	4.164e-16	0.39291	0.549	0.281	9.14372e-12	DsRed-9
Sept9	4.96553e-21	0.392571	0.805	0.47	1.09038e-16	DsRed-9
Rps2	9.61273e-24	0.392175	1	0.999	2.11086e-19	DsRed-9
Stx4a	4.90069e-44	0.391937	0.684	0.223	1.07614e-39	DsRed-9
Slc6a20a	8.13824e-127	0.390653	0.421	0.028	1.78708e-122	DsRed-9
Olfml3	2.39839e-92	0.390328	0.436	0.042	5.26661e-88	DsRed-9
Carnmt1	7.44975e-33	0.390292	0.617	0.231	1.63589e-28	DsRed-9
Aldh7a1	1.51934e-33	0.389992	0.609	0.208	3.33631e-29	DsRed-9
Mcm6	9.47102e-33	0.389956	0.444	0.118	2.07974e-28	DsRed-9
Nasp	5.38182e-14	0.38974	0.835	0.649	1.18179e-09	DsRed-9
Gas1	1.80699e-125	0.388685	0.414	0.027	3.96796e-121	DsRed-9
Lamc1	6.6206e-79	0.388517	0.549	0.085	1.45382e-74	DsRed-9
Kdelr3	0	0.388356	0.429	0.002	0	DsRed-9
Litaf	5.89267e-70	0.387782	0.481	0.069	1.29397e-65	DsRed-9
Fgfr3	5.02594e-21	0.387589	0.113	0.013	1.10365e-16	DsRed-9
Rbms2	8.9799e-115	0.387176	0.564	0.058	1.9719e-110	DsRed-9
Usp1	5.58689e-54	0.386445	0.632	0.152	1.22683e-49	DsRed-9
Sp5	0	0.386236	0.383	0.003	0	DsRed-9
Fjx1	2.18674e-19	0.385901	0.594	0.253	4.80187e-15	DsRed-9
Spi1	3.44308e-09	0.385146	0.113	0.027	7.56066e-05	DsRed-9
Slc39a1	7.41333e-30	0.384316	0.579	0.205	1.62789e-25	DsRed-9
Tmed9	8.69616e-25	0.384263	0.962	0.817	1.90959e-20	DsRed-9
Rps19	2.20399e-26	0.383556	0.992	0.999	4.83974e-22	DsRed-9
Tpt1	1.22666e-33	0.383402	1	0.999	2.69362e-29	DsRed-9
Tmem51	1.64828e-158	0.382097	0.466	0.027	3.61945e-154	DsRed-9
Axl	0	0.381606	0.489	0.01	0	DsRed-9
Lman1	6.47402e-26	0.381255	0.759	0.384	1.42163e-21	DsRed-9
Abca1	8.62352e-69	0.380994	0.368	0.041	1.89364e-64	DsRed-9
Plin3	2.68703e-98	0.380827	0.526	0.06	5.90045e-94	DsRed-9
Pnp	2.14869e-05	0.379486	0.466	0.307	0.471832	DsRed-9
Pdia4	3.11515e-25	0.378842	0.797	0.419	6.84055e-21	DsRed-9
Sdc1	1.26203e-44	0.378749	0.594	0.159	2.7713e-40	DsRed-9
Tns3	3.51887e-85	0.378207	0.519	0.069	7.7271e-81	DsRed-9
Ctnnb1	3.97776e-19	0.377946	0.932	0.806	8.73477e-15	DsRed-9
Fermt2	2.98956e-29	0.377802	0.632	0.249	6.56477e-25	DsRed-9
Actn4	3.70904e-26	0.376803	0.752	0.386	8.14468e-22	DsRed-9
Snrpb	2.25962e-15	0.376646	0.97	0.941	4.9619e-11	DsRed-9
Fam114a1	2.49744e-208	0.376632	0.481	0.02	5.48413e-204	DsRed-9
Nudcd2	1.94957e-15	0.376517	0.752	0.528	4.28106e-11	DsRed-9
Lap3	9.73936e-18	0.376461	0.624	0.34	2.13867e-13	DsRed-9
Ctsk	1.07629e-164	0.375482	0.361	0.014	2.36343e-160	DsRed-9
Ech1	4.52171e-19	0.37524	0.842	0.532	9.92922e-15	DsRed-9
Cat	6.67356e-23	0.375107	0.722	0.346	1.46545e-18	DsRed-9
Ranbp3l	6.08651e-193	0.374639	0.271	0.004	1.33654e-188	DsRed-9
Plin2	6.61743e-22	0.37412	0.654	0.283	1.45312e-17	DsRed-9
Rps10	2.55814e-28	0.374026	1	0.997	5.61743e-24	DsRed-9
Vkorc1	1.11086e-16	0.372266	0.662	0.378	2.43933e-12	DsRed-9
Klf6	1.1288e-11	0.372159	0.82	0.654	2.47873e-07	DsRed-9
Man2b1	1.85667e-08	0.371248	0.346	0.173	0.000407707	DsRed-9
Krcc1	1.51267e-25	0.369475	0.699	0.308	3.32166e-21	DsRed-9
Ccdc34	2.65572e-18	0.36944	0.865	0.64	5.8317e-14	DsRed-9
Rnaseh2c	5.3344e-19	0.369323	0.827	0.551	1.17138e-14	DsRed-9
Tmem123	1.29447e-140	0.368822	0.609	0.054	2.84253e-136	DsRed-9
Creb3l1	5.33479e-76	0.368402	0.474	0.065	1.17147e-71	DsRed-9
Angptl2	1.11398e-112	0.367206	0.301	0.015	2.44619e-108	DsRed-9
Surf4	7.2412e-20	0.366951	0.805	0.53	1.5901e-15	DsRed-9
Rpl39	1.53786e-30	0.366104	0.992	0.997	3.37698e-26	DsRed-9
Uaca	6.06901e-152	0.365634	0.511	0.035	1.33269e-147	DsRed-9
Yif1a	8.95642e-31	0.365156	0.752	0.337	1.96674e-26	DsRed-9
Rab13	9.13902e-62	0.364939	0.511	0.092	2.00684e-57	DsRed-9
Metrn	7.47743e-42	0.363981	0.489	0.106	1.64197e-37	DsRed-9
Impdh2	1.6037e-13	0.363042	0.827	0.692	3.52156e-09	DsRed-9
H2-K1	7.20993e-12	0.362081	0.188	0.054	1.58323e-07	DsRed-9
Rpl10	5.93756e-17	0.36175	0.985	0.997	1.30383e-12	DsRed-9
Cyp1b1	0	0.361729	0.383	0.004	0	DsRed-9
Lpp	6.75769e-52	0.361673	0.617	0.15	1.48392e-47	DsRed-9
Unc93b1	8.84308e-18	0.361113	0.188	0.038	1.94185e-13	DsRed-9
Tmem150a	1.11094e-09	0.360368	0.421	0.228	2.43951e-05	DsRed-9
Etfa	1.97722e-24	0.359609	0.744	0.378	4.34177e-20	DsRed-9
Tlcd1	1.06629e-61	0.359434	0.263	0.023	2.34146e-57	DsRed-9
Dse	2.4061e-69	0.359296	0.541	0.09	5.28355e-65	DsRed-9
Hbb-bh1	1.08616e-08	0.359236	0.444	0.231	0.00023851	DsRed-9
Gusb	9.03019e-17	0.35921	0.632	0.329	1.98294e-12	DsRed-9
Pard6g	5.14561e-13	0.358183	0.669	0.412	1.12992e-08	DsRed-9
St6galnac3	9.7084e-68	0.358161	0.556	0.098	2.13187e-63	DsRed-9
Shc1	2.53944e-67	0.358153	0.549	0.096	5.57635e-63	DsRed-9
Mt3	7.76469e-09	0.35796	0.271	0.564	0.000170505	DsRed-9
Vamp3	1.16304e-25	0.357951	0.805	0.407	2.55391e-21	DsRed-9
Rps14	8.42766e-17	0.356717	1	0.998	1.85063e-12	DsRed-9
Cnih4	4.58635e-26	0.356061	0.729	0.351	1.00712e-21	DsRed-9
Mcm3	5.12334e-229	0.356009	0.414	0.011	1.12503e-224	DsRed-9
Selenoh	2.93228e-08	0.356001	0.895	0.917	0.000643899	DsRed-9
Rpl23	2.67241e-31	0.355733	1	0.999	5.86834e-27	DsRed-9
Snx6	3.61072e-09	0.355348	0.872	0.75	7.92878e-05	DsRed-9
Cnpy2	6.31708e-17	0.354517	0.962	0.865	1.38717e-12	DsRed-9
Tk1	1.71583e-189	0.354443	0.383	0.013	3.7678e-185	DsRed-9
Creg1	1.30007e-30	0.353523	0.541	0.174	2.85483e-26	DsRed-9
Rpl17	7.12264e-16	0.35343	0.985	0.998	1.56406e-11	DsRed-9
Hjurp	3.86731e-15	0.353314	0.632	0.369	8.49223e-11	DsRed-9
Rbm3	4.09883e-16	0.35239	0.97	0.971	9.00061e-12	DsRed-9
Rnf26	7.45561e-37	0.351563	0.609	0.199	1.63718e-32	DsRed-9
Cd68	1.93065e-07	0.350711	0.165	0.059	0.00423951	DsRed-9
Rbpms	1.69868e-90	0.349672	0.504	0.061	3.73013e-86	DsRed-9
Lrrc59	3.22737e-15	0.349517	0.895	0.7	7.08698e-11	DsRed-9
Rps13	1.05477e-25	0.348874	1	0.998	2.31617e-21	DsRed-9
Rps27	2.59235e-18	0.347822	0.992	0.999	5.69255e-14	DsRed-9
Necap2	3.8181e-32	0.34772	0.571	0.187	8.38417e-28	DsRed-9
Rarres2	9.24209e-170	0.346868	0.248	0.004	2.02947e-165	DsRed-9
Fbn1	2.0793e-91	0.346743	0.504	0.061	4.56594e-87	DsRed-9
Kank2	4.00766e-293	0.344495	0.466	0.01	8.80042e-289	DsRed-9
Srgn	1.07736e-43	0.344487	0.195	0.018	2.36578e-39	DsRed-9
Efnb1	1.59716e-14	0.343888	0.722	0.458	3.50719e-10	DsRed-9
Rps3	4.48433e-25	0.343738	0.992	0.998	9.84714e-21	DsRed-9
Ckap4	3.14849e-11	0.343681	0.797	0.698	6.91378e-07	DsRed-9
Scarf2	3.15913e-160	0.342747	0.474	0.028	6.93713e-156	DsRed-9
Col6a3	1.0526e-100	0.342666	0.466	0.046	2.31141e-96	DsRed-9
Hsd17b10	1.98006e-13	0.342532	0.85	0.674	4.34802e-09	DsRed-9
Dnajc9	6.14846e-15	0.342375	0.722	0.485	1.35014e-10	DsRed-9
Pld4	8.82905e-08	0.342372	0.12	0.034	0.00193877	DsRed-9
Ran	8.84257e-09	0.341985	0.992	0.989	0.000194174	DsRed-9
Isyna1	4.9128e-08	0.341288	0.782	0.688	0.0010788	DsRed-9
Cdh5	2.55425e-219	0.341284	0.263	0.003	5.60887e-215	DsRed-9
Prss23	2.11812e-86	0.340513	0.286	0.018	4.65117e-82	DsRed-9
Pdk3	3.36741e-42	0.340235	0.481	0.113	7.39449e-38	DsRed-9
Rhog	6.3194e-113	0.339951	0.549	0.055	1.38768e-108	DsRed-9
Pid1	2.15954e-27	0.339633	0.789	0.353	4.74214e-23	DsRed-9
Rpl32	1.11288e-19	0.33872	1	0.999	2.44378e-15	DsRed-9
Marc2	4.67826e-17	0.338242	0.699	0.398	1.0273e-12	DsRed-9
Dusp6	4.99186e-35	0.337972	0.459	0.118	1.09616e-30	DsRed-9
Itgb1	7.73251e-17	0.337661	0.865	0.625	1.69798e-12	DsRed-9
Pald1	2.08781e-76	0.337323	0.466	0.06	4.58462e-72	DsRed-9
Rplp2	2.84645e-20	0.33727	1	0.998	6.25051e-16	DsRed-9
Atad2	1.20306e-197	0.336621	0.466	0.019	2.6418e-193	DsRed-9
Tagln	2.73726e-78	0.336596	0.323	0.028	6.01074e-74	DsRed-9
Tacc3	1.18452e-37	0.336588	0.391	0.081	2.60108e-33	DsRed-9
Dlc1	5.6239e-45	0.335768	0.556	0.144	1.23495e-40	DsRed-9
Nes	2.61264e-59	0.335378	0.466	0.074	5.7371e-55	DsRed-9
Vstm4	2.95234e-191	0.3351	0.323	0.008	6.48305e-187	DsRed-9
Tom1l1	5.51659e-49	0.335005	0.534	0.119	1.21139e-44	DsRed-9
Itm2c	1.78375e-07	0.334664	0.932	0.809	0.00391693	DsRed-9
Rps24	1.34046e-27	0.334645	1	0.999	2.94352e-23	DsRed-9
Notch1	4.6378e-212	0.334622	0.429	0.014	1.01841e-207	DsRed-9
Mlec	2.57279e-18	0.334481	0.752	0.445	5.6496e-14	DsRed-9
Col11a1	2.50529e-58	0.33293	0.496	0.088	5.50136e-54	DsRed-9
S1pr1	4.0708e-87	0.332633	0.233	0.012	8.93907e-83	DsRed-9
Bmp5	0	0.332599	0.421	0.005	0	DsRed-9
Rgcc	2.89656e-15	0.332141	0.226	0.061	6.36055e-11	DsRed-9
Cdk2	7.64559e-290	0.332062	0.489	0.012	1.6789e-285	DsRed-9
Ptch1	4.90869e-08	0.331325	0.459	0.27	0.0010779	DsRed-9
Parva	4.89284e-43	0.331017	0.624	0.18	1.07442e-38	DsRed-9
Rps17	3.02447e-13	0.330962	1	0.994	6.64144e-09	DsRed-9
Ppp1r14b	2.7567e-06	0.330932	0.902	0.891	0.0605344	DsRed-9
Foxc2	0	0.330845	0.368	0.001	0	DsRed-9
Tns1	3.51251e-97	0.330749	0.564	0.071	7.71311e-93	DsRed-9
Manf	4.06674e-09	0.330357	0.955	0.849	8.93015e-05	DsRed-9
Hmgn3	1.89062e-11	0.329292	0.887	0.669	4.15161e-07	DsRed-9
Lmnb1	5.95955e-13	0.329116	0.782	0.547	1.30866e-08	DsRed-9
Uhrf1	4.98717e-135	0.32877	0.466	0.032	1.09513e-130	DsRed-9
Cenpw	8.45384e-16	0.32864	0.489	0.229	1.85638e-11	DsRed-9
Plod1	2.58021e-114	0.32837	0.421	0.031	5.66589e-110	DsRed-9
Ralb	1.02434e-20	0.328339	0.744	0.381	2.24934e-16	DsRed-9
Snhg18	5.85041e-42	0.32815	0.511	0.123	1.28469e-37	DsRed-9
Pbxip1	1.03479e-33	0.32802	0.436	0.108	2.27229e-29	DsRed-9
Reep3	8.09883e-22	0.327636	0.617	0.263	1.77842e-17	DsRed-9
Casp6	1.20825e-51	0.327164	0.571	0.128	2.6532e-47	DsRed-9
Slc7a11	3.75767e-121	0.326625	0.271	0.01	8.25148e-117	DsRed-9
Pmf1	6.27602e-31	0.326597	0.571	0.194	1.37815e-26	DsRed-9
Tmem119	4.88611e-153	0.326202	0.474	0.028	1.07294e-148	DsRed-9
Prc1	6.96182e-50	0.326079	0.308	0.041	1.52875e-45	DsRed-9
Hmbs	2.86519e-22	0.326024	0.752	0.408	6.29167e-18	DsRed-9
Cenpm	2.43609e-90	0.325893	0.436	0.045	5.34941e-86	DsRed-9
1810037I17Rik	1.57682e-10	0.325826	0.865	0.716	3.46254e-06	DsRed-9
Sdc4	2.78509e-95	0.325511	0.256	0.013	6.11578e-91	DsRed-9
Pttg1ip	9.25326e-22	0.325279	0.662	0.314	2.03192e-17	DsRed-9
Dhrs4	1.81688e-48	0.324284	0.617	0.154	3.98968e-44	DsRed-9
Pon2	1.20596e-30	0.323704	0.504	0.15	2.64818e-26	DsRed-9
Hat1	2.20866e-25	0.3234	0.564	0.222	4.85e-21	DsRed-9
Nme4	1.31921e-37	0.323103	0.564	0.155	2.89685e-33	DsRed-9
Rgma	1.61746e-16	0.322611	0.556	0.229	3.55179e-12	DsRed-9
Rcsd1	3.88863e-243	0.322435	0.481	0.015	8.53904e-239	DsRed-9
Nudt9	2.41543e-17	0.322199	0.842	0.584	5.30404e-13	DsRed-9
Gpx1	7.1171e-09	0.32219	0.917	0.843	0.000156284	DsRed-9
Tuba1c	1.81697e-82	0.322052	0.278	0.019	3.98988e-78	DsRed-9
Bak1	1.8123e-32	0.321289	0.662	0.251	3.97962e-28	DsRed-9
Cp	2.08104e-267	0.320595	0.323	0.004	4.56976e-263	DsRed-9
Ctsh	4.17414e-36	0.320141	0.195	0.022	9.16599e-32	DsRed-9
Fau	8.65867e-24	0.319445	1	1	1.90136e-19	DsRed-9
Capzb	3.12497e-16	0.319433	0.932	0.926	6.86213e-12	DsRed-9
P3h4	3.13451e-20	0.318411	0.624	0.288	6.88307e-16	DsRed-9
Lama1	3.95228e-82	0.317544	0.436	0.049	8.67882e-78	DsRed-9
Txn1	1.60907e-12	0.317429	0.955	0.956	3.53335e-08	DsRed-9
Tmem176b	1.26984e-07	0.31737	0.895	0.738	0.00278844	DsRed-9
Plxnb2	7.39856e-18	0.317002	0.722	0.403	1.62465e-13	DsRed-9
Prdx6	1.30192e-10	0.316817	0.895	0.726	2.85888e-06	DsRed-9
Nucks1	2.31429e-08	0.3168	0.872	0.809	0.000508196	DsRed-9
Amotl1	5.94753e-19	0.316508	0.594	0.279	1.30602e-14	DsRed-9
Pbk	1.54504e-234	0.31609	0.308	0.004	3.39276e-230	DsRed-9
Igf2bp1	2.14246e-28	0.315957	0.639	0.226	4.70464e-24	DsRed-9
Fam111a	6.3315e-39	0.31514	0.391	0.079	1.39033e-34	DsRed-9
Tmed3	3.32795e-12	0.315131	0.789	0.52	7.30785e-08	DsRed-9
Rpl9	7.87854e-26	0.315112	0.992	0.999	1.73005e-21	DsRed-9
Lman2	7.91596e-16	0.314506	0.752	0.452	1.73827e-11	DsRed-9
Plscr3	1.68317e-19	0.314403	0.729	0.399	3.69606e-15	DsRed-9
Fcgr3	2.47214e-06	0.314208	0.105	0.032	0.0542857	DsRed-9
Emc8	4.88919e-19	0.313646	0.812	0.518	1.07362e-14	DsRed-9
Creld2	6.47064e-26	0.312579	0.669	0.286	1.42089e-21	DsRed-9
Mxra8	8.30422e-104	0.311777	0.406	0.032	1.82352e-99	DsRed-9
Wipi1	5.66685e-63	0.311705	0.489	0.08	1.24438e-58	DsRed-9
Tmbim6	2.0948e-10	0.311173	0.925	0.777	4.59996e-06	DsRed-9
2610001J05Rik	1.75897e-14	0.311165	0.812	0.593	3.86252e-10	DsRed-9
Npm3	3.19971e-19	0.311104	0.744	0.412	7.02625e-15	DsRed-9
Creb3l2	9.41292e-153	0.310948	0.451	0.026	2.06698e-148	DsRed-9
Ier5	1.82864e-08	0.310708	0.534	0.312	0.00040155	DsRed-9
Hba-x	6.09065e-10	0.310486	0.526	0.277	1.33745e-05	DsRed-9
Tgif1	2.80981e-157	0.310055	0.398	0.018	6.17006e-153	DsRed-9
Nsmce4a	2.15475e-12	0.30999	0.805	0.63	4.73162e-08	DsRed-9
Aard	8.80514e-18	0.309962	0.414	0.156	1.93352e-13	DsRed-9
Plk1	1.33857e-150	0.308588	0.293	0.009	2.93938e-146	DsRed-9
Lsm6	1.62993e-11	0.308566	0.932	0.851	3.57917e-07	DsRed-9
Rack1	2.44942e-14	0.308457	0.985	0.992	5.37868e-10	DsRed-9
Ugp2	6.2325e-14	0.308054	0.684	0.438	1.36859e-09	DsRed-9
Arl4a	0.00308743	0.308045	0.82	0.717	1	DsRed-9
Pcna	4.48928e-11	0.307663	0.541	0.315	9.85801e-07	DsRed-9
Slc50a1	1.6456e-20	0.307492	0.571	0.244	3.61357e-16	DsRed-9
Ror2	3.09816e-101	0.307329	0.481	0.047	6.80325e-97	DsRed-9
Fmo1	8.07657e-132	0.307276	0.316	0.014	1.77353e-127	DsRed-9
Rps6	1.04725e-12	0.307131	0.962	0.997	2.29965e-08	DsRed-9
Gnai2	1.71693e-12	0.30712	1	0.951	3.7702e-08	DsRed-9
Zic5	2.86537e-108	0.306419	0.459	0.039	6.29207e-104	DsRed-9
Tmem64	9.36246e-34	0.306409	0.519	0.152	2.0559e-29	DsRed-9
Bcl2l12	1.56027e-237	0.305984	0.519	0.019	3.4262e-233	DsRed-9
Slc6a9	9.03975e-13	0.305446	0.195	0.056	1.98504e-08	DsRed-9
1190002N15Rik	6.83397e-24	0.305383	0.549	0.2	1.50067e-19	DsRed-9
Msn	1.11011e-31	0.305294	0.609	0.197	2.43769e-27	DsRed-9
Bcl2	7.97958e-16	0.305259	0.466	0.197	1.75224e-11	DsRed-9
Prim1	9.81195e-27	0.305235	0.466	0.145	2.15461e-22	DsRed-9
Nt5dc2	2.78702e-10	0.30463	0.82	0.685	6.12002e-06	DsRed-9
Ccdc102a	0	0.3046	0.436	0.004	0	DsRed-9
Mrpl18	6.44692e-12	0.303573	0.865	0.781	1.41568e-07	DsRed-9
Nfe2l2	5.41129e-44	0.303547	0.376	0.064	1.18826e-39	DsRed-9
Fkbp7	3.02107e-82	0.303475	0.414	0.043	6.63397e-78	DsRed-9
Bcap31	6.24473e-12	0.303324	0.805	0.587	1.37128e-07	DsRed-9
Fundc2	8.68549e-14	0.303071	0.88	0.756	1.90725e-09	DsRed-9
Egr1	1.2726e-08	0.302969	0.526	0.318	0.00027945	DsRed-9
Lmf2	1.7505e-36	0.302732	0.534	0.149	3.84391e-32	DsRed-9
Nucb1	7.33439e-16	0.301847	0.722	0.427	1.61056e-11	DsRed-9
Zfp703	6.37422e-36	0.301826	0.511	0.136	1.39972e-31	DsRed-9
Pttg1	4.3035e-24	0.301362	0.594	0.237	9.45005e-20	DsRed-9
Rpa3	7.12343e-21	0.300667	0.662	0.31	1.56423e-16	DsRed-9
Larp7	2.91546e-26	0.300331	0.744	0.333	6.40206e-22	DsRed-9
Col4a5	3.43827e-191	0.300273	0.331	0.008	7.5501e-187	DsRed-9
Lockd	7.08116e-155	0.300196	0.331	0.012	1.55495e-150	DsRed-9
Snai1	3.02146e-134	0.300072	0.436	0.028	6.63483e-130	DsRed-9
Lyar	5.47322e-14	0.299977	0.714	0.464	1.20186e-09	DsRed-9
Rpl26	1.63211e-18	0.299892	1	0.998	3.58396e-14	DsRed-9
Man2a1	3.39687e-34	0.299676	0.376	0.084	7.45918e-30	DsRed-9
Ezh2	2.10592e-12	0.299414	0.647	0.378	4.62438e-08	DsRed-9
Fbxo5	4.11368e-83	0.298945	0.376	0.035	9.03324e-79	DsRed-9
Fmod	6.36671e-197	0.298862	0.203	0.001	1.39807e-192	DsRed-9
Tor2a	5.10969e-21	0.298013	0.737	0.384	1.12204e-16	DsRed-9
Rap1a	2.55954e-11	0.297956	0.872	0.705	5.62048e-07	DsRed-9
Sipa1	6.0364e-41	0.297841	0.511	0.123	1.32553e-36	DsRed-9
Anp32e	5.95726e-11	0.29776	0.812	0.628	1.30815e-06	DsRed-9
Tspo	5.853e-80	0.297663	0.444	0.052	1.28526e-75	DsRed-9
Anxa7	7.15703e-32	0.297262	0.602	0.209	1.57161e-27	DsRed-9
Lrp1	6.06478e-07	0.29694	0.759	0.56	0.0133176	DsRed-9
Tgfbi	6.96496e-101	0.296302	0.241	0.01	1.52943e-96	DsRed-9
Iqgap1	4.01994e-24	0.296181	0.594	0.234	8.82739e-20	DsRed-9
Ube2i	1.82144e-13	0.29613	0.962	0.921	3.9997e-09	DsRed-9
Pabpc1	8.78719e-12	0.296029	0.947	0.952	1.92958e-07	DsRed-9
Rpl18	1.46251e-22	0.29599	1	0.999	3.21152e-18	DsRed-9
Map2k3	1.31119e-46	0.295955	0.549	0.131	2.87925e-42	DsRed-9
Utp11	1.04196e-16	0.295491	0.812	0.535	2.28804e-12	DsRed-9
Plp2	4.06723e-25	0.295469	0.481	0.163	8.93124e-21	DsRed-9
Gm2a	1.98516e-16	0.295171	0.466	0.192	4.35921e-12	DsRed-9
Vgll4	1.01562e-23	0.295166	0.526	0.183	2.2302e-19	DsRed-9
Rfc1	1.70613e-16	0.295044	0.609	0.321	3.74649e-12	DsRed-9
Arhgdib	1.41724e-28	0.294705	0.233	0.038	3.11212e-24	DsRed-9
Ddr2	0	0.294224	0.429	0.003	0	DsRed-9
Tgfb2	0.00216705	0.294102	0.158	0.088	1	DsRed-9
Laptm4b	2.16859e-26	0.293868	0.541	0.188	4.762e-22	DsRed-9
Incenp	9.00282e-36	0.293793	0.398	0.088	1.97693e-31	DsRed-9
Ecscr	1.97893e-90	0.293507	0.391	0.034	4.34553e-86	DsRed-9
Hic1	1.05994e-260	0.293174	0.346	0.005	2.32751e-256	DsRed-9
Bet1	4.8525e-22	0.292996	0.684	0.327	1.06556e-17	DsRed-9
Slc1a5	2.42875e-53	0.292863	0.421	0.069	5.3333e-49	DsRed-9
Cib1	1.33644e-30	0.292619	0.556	0.176	2.93468e-26	DsRed-9
Cdc42se1	4.28988e-18	0.292559	0.632	0.315	9.42016e-14	DsRed-9
Knstrn	7.15788e-69	0.292482	0.293	0.026	1.5718e-64	DsRed-9
Klf9	6.88225e-22	0.292378	0.233	0.049	1.51127e-17	DsRed-9
Ssr1	7.83401e-13	0.291764	0.872	0.711	1.72027e-08	DsRed-9
Rnh1	2.27796e-15	0.291602	0.737	0.431	5.00218e-11	DsRed-9
Asf1b	7.50811e-84	0.291341	0.376	0.035	1.64871e-79	DsRed-9
Mcl1	7.75477e-07	0.290746	0.797	0.612	0.0170287	DsRed-9
Rfc4	2.11799e-18	0.290121	0.526	0.234	4.6509e-14	DsRed-9
Mylip	2.52594e-62	0.289773	0.444	0.067	5.54672e-58	DsRed-9
Ppp4c	1.08279e-13	0.289183	0.917	0.808	2.37769e-09	DsRed-9
Rac1	6.30921e-13	0.289009	0.932	0.913	1.38544e-08	DsRed-9
Nab2	2.93376e-94	0.28822	0.444	0.044	6.44224e-90	DsRed-9
Nfic	1.82171e-31	0.287973	0.564	0.184	4.0003e-27	DsRed-9
Loxl2	2.61203e-117	0.287877	0.414	0.029	5.73575e-113	DsRed-9
Chchd7	4.63151e-13	0.28768	0.744	0.487	1.01703e-08	DsRed-9
Fbln2	5.98997e-139	0.287476	0.346	0.016	1.31534e-134	DsRed-9
Dnajc3	3.2239e-16	0.287139	0.586	0.288	7.07936e-12	DsRed-9
Rps25	5.73278e-12	0.285918	0.985	0.996	1.25886e-07	DsRed-9
Suclg2	5.50688e-64	0.285788	0.504	0.084	1.20926e-59	DsRed-9
Epb41l2	2.67775e-18	0.285773	0.586	0.286	5.88006e-14	DsRed-9
Nr2f6	5.12026e-14	0.285373	0.737	0.469	1.12436e-09	DsRed-9
Acsbg1	1.19754e-19	0.285139	0.113	0.014	2.62969e-15	DsRed-9
Ltc4s	3.15291e-07	0.284843	0.105	0.029	0.00692347	DsRed-9
Prelid1	1.81667e-12	0.284605	0.962	0.918	3.98923e-08	DsRed-9
Jcad	5.98602e-238	0.284531	0.398	0.009	1.31447e-233	DsRed-9
Racgap1	2.86965e-15	0.284515	0.459	0.198	6.30147e-11	DsRed-9
Rpl31	8.89209e-11	0.283508	0.97	0.995	1.95261e-06	DsRed-9
Fam96a	3.00727e-13	0.283411	0.91	0.725	6.60366e-09	DsRed-9
Slc35b2	5.26173e-20	0.282876	0.662	0.33	1.15542e-15	DsRed-9
Mcm2	4.72546e-46	0.282829	0.421	0.077	1.03766e-41	DsRed-9
Il6st	8.84257e-30	0.282459	0.556	0.183	1.94174e-25	DsRed-9
Tgfbr2	8.32752e-159	0.28233	0.391	0.017	1.82864e-154	DsRed-9
Dock1	1.14668e-266	0.282043	0.444	0.011	2.51799e-262	DsRed-9
Paics	4.80346e-13	0.281678	0.842	0.661	1.05479e-08	DsRed-9
Car2	1.72377e-18	0.281514	0.271	0.069	3.78523e-14	DsRed-9
S1pr2	1.23968e-65	0.281337	0.436	0.06	2.7222e-61	DsRed-9
Sec11a	1.49908e-11	0.281126	0.932	0.829	3.29184e-07	DsRed-9
Aurka	3.84409e-74	0.28105	0.323	0.029	8.44124e-70	DsRed-9
Slc35a4	7.98448e-21	0.280727	0.624	0.285	1.75331e-16	DsRed-9
Dkk2	9.2616e-199	0.280579	0.263	0.004	2.03376e-194	DsRed-9
Tcf19	1.76553e-185	0.280366	0.383	0.013	3.87694e-181	DsRed-9
Ptbp3	6.28138e-21	0.279501	0.669	0.304	1.37933e-16	DsRed-9
Tpp1	9.86799e-22	0.279439	0.496	0.186	2.16691e-17	DsRed-9
Rpa2	6.60231e-28	0.279012	0.571	0.207	1.4498e-23	DsRed-9
Plekhg2	1.90261e-65	0.278062	0.466	0.067	4.17794e-61	DsRed-9
Egfr	1.14162e-258	0.277805	0.383	0.007	2.50689e-254	DsRed-9
Abhd3	1.09784e-07	0.277732	0.113	0.031	0.00241076	DsRed-9
a	0	0.277521	0.368	0.002	0	DsRed-9
Scamp2	6.19499e-09	0.277198	0.459	0.243	0.000136036	DsRed-9
Cmc2	1.04366e-17	0.277132	0.669	0.362	2.29176e-13	DsRed-9
Efhd2	2.57169e-06	0.276935	0.526	0.37	0.0564718	DsRed-9
Frmd6	1.16744e-95	0.276892	0.444	0.044	2.56357e-91	DsRed-9
Sept11	5.5775e-11	0.276846	0.827	0.684	1.22476e-06	DsRed-9
Trp53	9.91471e-14	0.276606	0.744	0.499	2.17717e-09	DsRed-9
Fuca1	1.8345e-13	0.276523	0.692	0.409	4.02838e-09	DsRed-9
Ckap2l	6.88443e-168	0.276515	0.338	0.011	1.51175e-163	DsRed-9
Pdpn	1.68431e-104	0.276336	0.293	0.016	3.69857e-100	DsRed-9
Hdac1	4.80868e-14	0.276139	0.729	0.456	1.05594e-09	DsRed-9
Atp5g2	2.45239e-17	0.275938	1	0.99	5.38521e-13	DsRed-9
Arhgef25	1.10007e-16	0.275524	0.549	0.269	2.41564e-12	DsRed-9
Rpl11	7.03672e-20	0.275032	1	0.999	1.54519e-15	DsRed-9
Rasl11b	5.97679e-70	0.275013	0.406	0.049	1.31244e-65	DsRed-9
Mxd4	3.29414e-10	0.27469	0.692	0.474	7.23361e-06	DsRed-9
Coro1b	1.21823e-13	0.27461	0.714	0.436	2.67512e-09	DsRed-9
Gjc1	1.24463e-33	0.274033	0.511	0.141	2.73308e-29	DsRed-9
Vegfa	3.8888e-18	0.273885	0.406	0.15	8.53941e-14	DsRed-9
Btf3	1.46604e-17	0.273343	1	0.996	3.21927e-13	DsRed-9
Lxn	1.26038e-12	0.273096	0.654	0.355	2.76767e-08	DsRed-9
Luzp1	2.81843e-17	0.27309	0.489	0.207	6.18899e-13	DsRed-9
Sulf2	8.35232e-10	0.27234	0.632	0.424	1.83409e-05	DsRed-9
Prkd3	3.25972e-47	0.272297	0.429	0.077	7.15802e-43	DsRed-9
S100a1	1.82087e-23	0.272149	0.256	0.054	3.99844e-19	DsRed-9
1110008F13Rik	3.98529e-09	0.272052	0.925	0.821	8.75129e-05	DsRed-9
Nrp1	2.76472e-10	0.271892	0.436	0.22	6.07105e-06	DsRed-9
S100a10	7.86446e-09	0.271785	0.827	0.614	0.000172696	DsRed-9
Syngr2	7.32912e-79	0.271765	0.391	0.04	1.6094e-74	DsRed-9
Lsm3	3.0754e-08	0.27142	0.82	0.755	0.000675327	DsRed-9
Lage3	2.12158e-12	0.270755	0.744	0.526	4.65877e-08	DsRed-9
Rpl5	3.42402e-11	0.270731	0.977	0.99	7.51881e-07	DsRed-9
Agpat2	8.65289e-140	0.270447	0.421	0.025	1.90009e-135	DsRed-9
Rpsa	1.22615e-14	0.270424	1	0.999	2.69251e-10	DsRed-9
Skp2	6.15251e-43	0.269856	0.451	0.094	1.35103e-38	DsRed-9
Immp1l	2.76957e-09	0.26968	0.842	0.686	6.08169e-05	DsRed-9
Tmed5	2.63437e-14	0.269544	0.624	0.331	5.78482e-10	DsRed-9
Rpl4	2.73204e-11	0.269255	0.985	0.997	5.9993e-07	DsRed-9
Ifngr1	1.17836e-16	0.269137	0.361	0.127	2.58755e-12	DsRed-9
Rap1b	1.84213e-08	0.269025	0.902	0.847	0.000404514	DsRed-9
Foxp2	6.66501e-29	0.26896	0.586	0.181	1.46357e-24	DsRed-9
Arhgap28	2.27934e-63	0.268809	0.398	0.052	5.00521e-59	DsRed-9
Mfsd10	5.3609e-23	0.268748	0.662	0.285	1.1772e-18	DsRed-9
Elavl1	7.00979e-12	0.268699	0.812	0.637	1.53928e-07	DsRed-9
Mis18a	1.42304e-21	0.268677	0.496	0.185	3.12485e-17	DsRed-9
Prr5	2.94609e-17	0.268479	0.609	0.299	6.46932e-13	DsRed-9
Fam20a	1.04357e-211	0.267834	0.308	0.006	2.29158e-207	DsRed-9
Rfc5	2.90571e-25	0.266903	0.496	0.165	6.38065e-21	DsRed-9
Hmgcs2	2.23533e-179	0.266643	0.188	0.001	4.90857e-175	DsRed-9
Rnaseh2b	1.5661e-22	0.265861	0.624	0.268	3.43899e-18	DsRed-9
Rgl1	8.6284e-38	0.265832	0.368	0.073	1.89471e-33	DsRed-9
Wfdc1	2.46704e-59	0.264857	0.256	0.023	5.41737e-55	DsRed-9
Rpl21	6.9576e-21	0.264682	1	0.998	1.52782e-16	DsRed-9
Man1c1	2.54693e-46	0.264498	0.368	0.061	5.59281e-42	DsRed-9
Dhfr	1.81543e-34	0.264404	0.406	0.094	3.98651e-30	DsRed-9
Glo1	1.16152e-09	0.26431	0.902	0.683	2.55059e-05	DsRed-9
Rpl41	1.86474e-18	0.264165	1	1	4.09478e-14	DsRed-9
Sar1a	6.48879e-09	0.26409	0.857	0.755	0.000142487	DsRed-9
Mmp11	4.02096e-19	0.263649	0.376	0.116	8.82963e-15	DsRed-9
Psat1	2.75226e-14	0.263451	0.511	0.238	6.04368e-10	DsRed-9
Ptgr1	6.00047e-216	0.262903	0.391	0.011	1.31764e-211	DsRed-9
Phldb2	8.39919e-143	0.262838	0.391	0.02	1.84438e-138	DsRed-9
B3gnt9	8.60847e-46	0.262755	0.376	0.065	1.89033e-41	DsRed-9
Tmem39a	3.99718e-50	0.262551	0.534	0.111	8.7774e-46	DsRed-9
Adk	7.72853e-15	0.262506	0.556	0.277	1.69711e-10	DsRed-9
Bola3	4.39784e-18	0.262426	0.767	0.421	9.65721e-14	DsRed-9
Rpl3	1.1108e-15	0.262387	1	0.998	2.43921e-11	DsRed-9
Cbfb	1.57045e-16	0.262301	0.669	0.364	3.44855e-12	DsRed-9
Trps1	3.33484e-23	0.262231	0.511	0.179	7.32298e-19	DsRed-9
Serping1	4.09478e-29	0.26222	0.429	0.112	8.99173e-25	DsRed-9
Dock6	6.12946e-76	0.262097	0.429	0.052	1.34597e-71	DsRed-9
Lamb2	2.52173e-172	0.261581	0.391	0.016	5.53746e-168	DsRed-9
Eny2	3.72134e-09	0.261346	0.91	0.87	8.17168e-05	DsRed-9
Timp4	0.000492306	0.26122	0.113	0.05	1	DsRed-9
Sash1	4.13308e-05	0.261184	0.286	0.165	0.907583	DsRed-9
Mis18bp1	6.69234e-157	0.260075	0.323	0.011	1.46957e-152	DsRed-9
Acap2	9.01281e-32	0.259451	0.511	0.151	1.97912e-27	DsRed-9
Rdx	2.19517e-11	0.259084	0.887	0.747	4.82037e-07	DsRed-9
Slc19a1	1.62209e-21	0.258943	0.474	0.173	3.56196e-17	DsRed-9
1700020I14Rik	3.87868e-17	0.258705	0.737	0.393	8.5172e-13	DsRed-9
Bmp6	1.82394e-99	0.258703	0.218	0.008	4.00519e-95	DsRed-9
Tmed1	6.14469e-16	0.258467	0.699	0.409	1.34931e-11	DsRed-9
G3bp1	8.36602e-11	0.258428	0.895	0.855	1.83709e-06	DsRed-9
Tm9sf2	1.42085e-13	0.258406	0.744	0.459	3.12004e-09	DsRed-9
Aldh2	7.64829e-08	0.258365	0.699	0.487	0.00167949	DsRed-9
Sh3gl1	1.72042e-15	0.258229	0.714	0.401	3.77786e-11	DsRed-9
Cyp20a1	7.21314e-16	0.258067	0.586	0.293	1.58393e-11	DsRed-9
Evi5	7.51503e-17	0.257914	0.617	0.295	1.65023e-12	DsRed-9
Pcbp1	6.24709e-11	0.257443	0.992	0.962	1.3718e-06	DsRed-9
Ssrp1	7.06518e-10	0.257385	0.827	0.701	1.55144e-05	DsRed-9
Fgfr1	4.21203e-13	0.257136	0.624	0.372	9.24919e-09	DsRed-9
Itga11	1.80642e-209	0.256966	0.376	0.01	3.96672e-205	DsRed-9
Rpl27a	3.24505e-22	0.25692	1	0.999	7.1258e-18	DsRed-9
Lcp1	3.34785e-08	0.256915	0.105	0.026	0.000735154	DsRed-9
Dhrs3	2.68721e-60	0.256737	0.218	0.016	5.90085e-56	DsRed-9
Bmp4	1.3285e-284	0.256646	0.308	0.002	2.91725e-280	DsRed-9
Lama2	1.50032e-147	0.256623	0.323	0.012	3.29454e-143	DsRed-9
Tgfb1	2.60697e-07	0.256388	0.195	0.078	0.00572464	DsRed-9
Polr2a	1.28275e-11	0.256252	0.692	0.411	2.81678e-07	DsRed-9
Lig1	1.05418e-10	0.255853	0.556	0.327	2.31488e-06	DsRed-9
Ube2s	0.00332362	0.255678	0.955	0.979	1	DsRed-9
Hba-a1	9.77973e-10	0.255443	0.684	0.427	2.14753e-05	DsRed-9
Cpne3	2.02422e-42	0.255033	0.451	0.094	4.44498e-38	DsRed-9
Hnrnpm	4.88615e-14	0.254796	0.932	0.758	1.07295e-09	DsRed-9
Cast	1.61717e-107	0.254455	0.414	0.033	3.55114e-103	DsRed-9
Cpxm1	2.10545e-33	0.254284	0.376	0.082	4.62335e-29	DsRed-9
Tagln2	8.15344e-16	0.254275	0.639	0.307	1.79041e-11	DsRed-9
Ehd4	0.00209841	0.25414	0.158	0.087	1	DsRed-9
Ncln	3.24277e-17	0.254095	0.639	0.318	7.1208e-13	DsRed-9
Lrp10	4.68795e-15	0.253921	0.526	0.248	1.02943e-10	DsRed-9
Gjb2	3.63372e-110	0.253901	0.15	0.002	7.9793e-106	DsRed-9
Ccne1	2.522e-37	0.253478	0.353	0.069	5.53806e-33	DsRed-9
Tbrg1	2.16464e-07	0.253305	0.812	0.691	0.00475333	DsRed-9
Asah1	6.09704e-05	0.253261	0.639	0.484	1	DsRed-9
Tgif2	4.1913e-137	0.253171	0.376	0.019	9.20367e-133	DsRed-9
Lhfpl2	3.88503e-56	0.253165	0.451	0.074	8.53113e-52	DsRed-9
Foxf2	3.89817e-291	0.252834	0.271	0.001	8.55999e-287	DsRed-9
Jag1	1.54358e-35	0.252761	0.368	0.074	3.38954e-31	DsRed-9
E2f5	1.76857e-29	0.252704	0.534	0.168	3.8836e-25	DsRed-9
Hspa1a	1.37796e-08	0.252622	0.286	0.132	0.000302586	DsRed-9
Klf3	5.9996e-35	0.252431	0.504	0.129	1.31745e-30	DsRed-9
Eno1	4.10433e-07	0.252302	0.902	0.861	0.00901269	DsRed-9
Col27a1	5.6618e-204	0.252129	0.398	0.012	1.24327e-199	DsRed-9
Mob1a	1.6541e-47	0.251954	0.534	0.116	3.63225e-43	DsRed-9
Slc25a18	3.65195e-14	0.251095	0.12	0.021	8.01931e-10	DsRed-9
Tceal8	9.76582e-08	0.251023	0.85	0.843	0.00214448	DsRed-9
Col13a1	1.25669e-154	0.250904	0.263	0.006	2.75956e-150	DsRed-9
Eci1	4.54453e-18	0.250757	0.534	0.228	9.97934e-14	DsRed-9
Dpm3	2.37082e-09	0.250709	0.827	0.62	5.20609e-05	DsRed-9
Chst14	5.39971e-205	0.250514	0.414	0.014	1.18572e-200	DsRed-9
Clspn	1.41131e-220	0.249946	0.353	0.008	3.0991e-216	DsRed-9
C1qtnf2	1.10555e-18	0.249717	0.308	0.092	2.42767e-14	DsRed-9
Tjp1	6.1695e-24	0.24956	0.444	0.146	1.35476e-19	DsRed-9
Marcks	6.78748e-12	0.249431	1	0.997	1.49046e-07	DsRed-9
Hnrnpa3	9.95968e-12	0.249291	0.985	0.971	2.18705e-07	DsRed-9
Odc1	1.53162e-07	0.248399	0.805	0.657	0.00336329	DsRed-9
Klf4	2.64509e-09	0.248367	0.323	0.145	5.80835e-05	DsRed-9
Ppia	8.36478e-11	0.248243	1	0.999	1.83682e-06	DsRed-9
Sypl	5.02394e-18	0.248198	0.571	0.248	1.10321e-13	DsRed-9
Comt	2.25737e-05	0.247788	0.872	0.769	0.495695	DsRed-9
Pkn2	4.185e-16	0.247685	0.654	0.34	9.18983e-12	DsRed-9
Klf2	5.51045e-07	0.247142	0.211	0.091	0.0121004	DsRed-9
Cyb5r3	1.38544e-10	0.246445	0.88	0.73	3.04228e-06	DsRed-9
Gm10076	3.17603e-08	0.246324	0.842	0.751	0.000697425	DsRed-9
Hist1h4i	1.11459e-41	0.245682	0.383	0.07	2.44752e-37	DsRed-9
Dtl	5.739e-144	0.245621	0.346	0.015	1.26023e-139	DsRed-9
Cdkn3	8.05374e-34	0.245589	0.301	0.055	1.76852e-29	DsRed-9
Acaa1a	8.90003e-08	0.245509	0.767	0.571	0.00195436	DsRed-9
Lbr	3.56162e-37	0.245391	0.481	0.119	7.82096e-33	DsRed-9
