# Supplementary material for: Developmental single-cell transcriptomics of hypothalamic POMC neurons reveal the genetic trajectories of multiple neuropeptidergic phenotypes
Source: eLife. 2022 Jan 19;11:e72883. doi: 10.7554/eLife.72883 (PMC8806186; doi:10.7554/eLife.72883)
Supplement: Figure 1—source data 1. [file elife-72883-fig1-data1.xlsx]

## Sheet: pomc.cluster.average.mergeclust
Figure 1-source data 1. Average gene expression [exp(logNormalized counts)-1)] obtained from the Seurat analysis of each of the 11 Pomc clusters integrated across all six developmental stages
Gene expression data are sorted based on highest to lowest for integrated cluster 1 starting with Malat1.
Integrated Cluster:	1. Pomc(high)/Prdm12	2. Pomc(med)/Ebf1	3. Pomc(med)/Nr4a2	4. Pomc(low)/Otp	5. Pomc(low)/Tac2	6. Pomc(low)/Dlx5	7. Pomc(low)/Prdm13	8. Pomc(low)/Pitx2	9. Microglia	10. VLMC	11. Astrocytes
Gene	Neurons	Neurons	Neurons	Neurons	Neurons	Neurons	Neurons	Neurons	Non-neurons	Non-neurons	Non-neurons
Malat1	130.216	143.117	185.795	222.83	175.253	156.453	132.65	252.131	85.061	99.7248	419.119
mt-Atp6	114.529	98.1369	121.662	101.967	132.592	124.431	91.1618	94.0796	104.031	75.2069	155.718
Meg3	43.2459	36.1628	116.796	51.5495	68.286	44.2895	42.5272	39.364	5.77611	22.5845	6.77997
Tuba1a	88.9838	140.441	96.3592	63.5916	56.119	66.6935	157.496	174.981	9.2713	38.3882	13.3649
mt-Co3	74.9664	65.888	79.9252	74.8619	84.6776	80.0669	62.4794	71.1853	60.2405	62.0349	101.648
Tmsb10	77.3136	84.3678	75.8818	81.7814	68.9643	89.3876	118.039	82.8342	9.93272	58.6818	4.67436
mt-Co2	59.1336	47.4787	66.2536	42.1561	68.8172	61.5207	35.655	39.7081	66.3323	33.6317	103.781
mt-Cytb	57.7364	48.086	63.5438	50.734	63.5834	60.4518	42.9404	48.4035	57.0666	41.3046	94.4915
mt-Co1	58.953	49.0846	58.7159	52.8664	69.9546	57.9767	41.6592	46.5345	56.8564	48.7488	106.224
Tubb2b	44.9855	59.0116	53.5032	35.2858	33.8614	44.7545	78.4692	80.7804	3.39596	10.8735	10.8893
Stmn1	48.0839	60.6047	48.4449	45.4348	47.3232	56.5916	78.4332	92.3251	8.52549	12.6775	3.80616
Tmsb4x	52.7975	68.5922	45.6574	63.0344	38.717	38.7367	71.4248	50.5188	268.873	44.283	23.3257
Rtn1	37.1207	37.7417	42.8811	38.6291	40.4647	36.6707	50.2099	40.2378	2.8014	10.2136	4.17932
Actb	46.5881	49.874	40.3318	44.5716	42.8197	46.4308	52.1912	44.4643	85.5159	39.787	17.9563
Snhg11	14.5609	12.7785	38.9012	7.20427	27.0527	13.6141	4.91684	7.4997	2.10327	1.02124	1.66836
Nnat	54.8176	52.8987	38.4803	45.9177	42.6547	39.8993	146.355	82.0779	4.11883	23.3714	11.5628
Tubb5	40.5219	49.5183	36.9811	33.2778	27.4318	37.7419	63.3402	60.046	12.6327	23.0579	3.58646
Actg1	38.0212	55.63	36.4863	31.1186	31.0109	37.6657	60.5156	57.4444	25.9879	39.6613	15.9402
Eef1a1	55.1136	54.515	33.6082	53.144	51.2492	52.9584	56.2426	49.2428	69.5246	75.6795	16.6456
Ubb	40.3594	43.9216	32.836	53.0408	49.019	49.5558	44.3752	47.4377	28.5174	41.5118	20.6422
Stmn2	34.0354	35.643	29.7965	15.4602	29.3786	22.7338	37.0096	27.9743	1.60061	3.11392	1.4789
mt-Nd1	35.455	34.3186	28.9547	42.7715	29.3091	32.2254	42.9729	37.8644	16.5118	35.4608	20.0018
Ppia	32.7225	31.9766	28.3835	23.6375	26.4544	25.9478	33.5998	23.1828	26.3552	36.2758	16.4322
mt-Nd4	26.8268	24.0331	27.1934	26.1433	28.4276	27.7458	24.2718	25.8054	23.7213	24.0711	40.1544
Tubb3	25.6981	37.4324	25.9691	19.1473	20.2903	23.872	39.1137	43.6575	1.52818	3.86883	1.45336
Ptma	29.9766	40.1998	25.5784	37.4268	27.0278	38.1877	33.7055	54.0938	22.4401	30.2109	6.35972
Rpl41	37.3666	33.7085	24.7693	44.1748	30.9019	36.2242	40.2798	25.9524	34.0102	54.1389	12.8435
Basp1	17.9356	20.7901	24.5306	12.8119	24.167	23.9608	17.0372	19.9019	9.2551	3.51873	3.63816
Stmn3	21.6587	21.1129	23.3212	14.6536	20.2618	18.8222	26.6517	17.4228	1.45574	1.91482	1.4233
Hspa8	29.2092	26.1235	22.5772	31.9183	25.2085	28.758	31.4958	29.386	19.2297	16.9164	14.8809
Ftl1	31.1905	39.0946	22.407	43.3707	23.1176	32.1127	46.3949	47.3933	70.43	55.8639	10.7508
Gnas	23.5105	20.4405	21.8172	22.9842	22.2359	20.1963	22.0482	18.0115	11.0964	24.4313	7.97488
Ly6h	20.684	14.4172	21.1336	18.6204	22.5746	18.8319	15.0017	12.0438	1.79695	0.982514	1.92637
mt-Nd2	18.1665	14.9826	20.8146	13.1805	19.3922	19.0249	11.7503	13.0974	16.5428	11.2337	29.8425
Pcsk1n	36.5985	27.2671	20.7969	32.6521	43.9557	30.3227	22.9986	16.1706	3.1868	1.69278	4.83201
Tubb2a	16.9338	16.3589	20.746	10.3785	21.1694	18.1179	16.0272	14.7625	3.76657	2.333	6.56442
Gap43	17.1422	20.6802	19.8614	10.6054	12.7709	13.4928	20.058	14.5715	1.60937	2.8092	1.42282
Calm2	24.0049	19.2803	19.328	18.9424	25.8645	21.7932	19.6861	14.4075	11.5411	5.17833	3.69756
H3f3a	22.5645	30.2	18.8842	31.1662	25.8742	31.1063	27.7602	35.9421	16.2111	21.71	9.4511
H3f3b	21.0417	26.7378	18.768	37.486	29.5725	31.847	22.1364	38.588	20.9722	18.8999	10.0775
Hsp90ab1	26.4615	24.1142	18.0431	26.0423	23.2638	25.9978	23.4725	20.0091	14.1077	22.1115	8.36119
Map1b	16.3335	21.4646	16.1118	11.4842	12.4089	12.917	18.6639	22.943	1.31338	3.4545	1.30311
Marcksl1	18.2657	21.223	15.7272	24.2806	15.8746	21.4118	24.4525	28.0062	3.73855	13.149	3.45719
Calm1	16.3338	14.0356	14.8987	9.78283	15.0847	12.6142	15.1457	10.9458	6.37458	8.47248	5.86428
Gapdh	16.0681	14.6244	14.6	11.3248	12.5929	12.5374	15.4235	13.3344	12.4054	14.7619	20.4544
Cfl1	16.8363	19.6592	14.3795	16.3647	12.1806	15.3855	21.2884	22.0448	19.0625	14.0924	6.63652
Rps29	21.2806	20.2901	14.1725	25.1969	22.408	23.3459	24.1959	16.6836	58.9765	38.4613	10.2927
Rps2	22.3119	17.7702	13.9591	18.9899	18.0879	19.9664	19.3412	12.6159	28.0195	29.0415	8.69138
Rpl13	24.7133	21.6899	13.9326	25.8848	22.1057	24.5645	23.8644	17.9784	43.165	42.3407	11.6394
Rpsa	17.9545	14.9235	13.4041	13.966	19.7322	18.8509	15.2518	11.861	30.5872	19.8733	7.64957
Uchl1	12.958	13.5677	12.904	11.1392	12.2064	13.873	15.8088	12.59	1.3951	1.27757	1.68203
Rps24	23.1791	20.9024	12.8559	21.9244	21.9316	22.8081	18.6215	15.4017	44.8022	28.1386	8.72384
Ttc3	14.994	12.1917	12.6785	10.8304	14.7139	13.5388	10.2574	12.7629	2.08614	4.1856	2.78874
Xist	6.88336	7.05503	12.6326	10.4792	10.4206	10.5293	7.95929	8.98011	8.84379	9.13192	10.8349
Eif1	18.3244	17.7286	12.3954	19.4131	15	17.1409	18.3174	15.8839	16.3536	16.2294	11.6221
Rpl37a	22.6337	20.5244	12.3642	29.0263	22.6314	25.8935	22.4058	15.642	27.194	34.1595	7.88834
Rps27a	22.4983	19.7996	12.3462	22.8648	21.6262	22.054	20.1746	14.7476	38.095	36.7335	8.52164
Fth1	13.5692	12.0819	12.2901	13.3968	12.8528	11.2615	14.5593	10.3512	38.8547	26.0149	12.8554
Ybx1	14.0668	15.0583	12.2825	13.3345	11.0417	13.9629	16.8685	14.5396	7.31727	11.2476	4.26268
Bex2	19.622	13.7337	12.2464	20.5177	20.1855	15.8727	14.0298	11.7935	2.04922	1.28845	2.76317
Slc25a4	13.758	13.2706	12.1603	10.8743	12.5915	11.8215	13.678	10.5956	4.41792	13.6706	8.36411
Mllt11	12.8963	14.2637	12.0489	10.7486	9.20846	11.1977	15.895	15.9432	0.797615	1.36416	0.957192
Rpl3	20.1683	16.9728	12.0199	19.148	19.6872	18.734	17.988	12.8141	26.971	27.7092	7.2396
Rplp0	17.8875	17.5794	12.0183	17.4877	18.6517	18.8119	17.9881	14.993	38.5394	35.605	7.29747
Ncam1	10.475	9.40986	11.7896	7.43897	11.3897	9.38653	8.68346	10.1541	0.964751	1.78884	10.8583
Pomc	33.7193	6.8963	11.7808	2.81155	2.29498	1.72511	1.62388	1.72957	2.2931	1.25453	2.41617
Rpl23	20.8223	18.5463	11.5699	18.96	18.8369	19.4245	18.7287	13.6675	32.5099	32.2593	7.37983
Rpl19	19.2321	17.4093	11.5223	19.1035	18.5798	19.4399	17.1534	13.9853	30.519	24.3673	8.29583
Fau	17.1659	16.4099	11.4991	19.449	17.909	18.9575	16.8113	13.1139	54.0166	24.9637	8.79083
Rpl37	21.1374	17.9287	11.4945	22.9848	20.8047	22.0933	19.3334	13.7697	23.5357	23.7295	6.52334
Ywhae	13.1572	14.5454	11.4644	12.0738	13.0304	13.432	15.1365	14.4249	6.97988	7.73081	6.57711
Tpt1	18.6716	20.4306	11.4167	24.57	19.9154	21.0542	16.8767	15.6098	40.1365	32.824	9.25041
Rps19	20.5549	17.6767	11.3447	23.1013	19.0143	20.5825	20.8443	14.05	31.2761	30.8067	6.83524
Rpl6	19.8251	18.3572	11.3399	20.9687	18.6883	19.9859	18.6147	14.3401	26.4693	25.3879	6.19501
Rpl38	19.4322	15.7889	11.1939	19.0393	17.2017	18.15	20.3209	12.6514	14.2703	20.302	5.37231
Fxyd6	13.1454	9.36609	11.1359	9.46963	11.068	12.6721	8.53426	8.51612	1.12347	2.74136	1.01517
Rpl9	21.2284	18.9382	11.1108	21.5801	18.7883	20.9668	18.6495	14.5602	30.5367	31.043	8.20009
Rps8	20.2553	19.2394	11.09	20.4869	16.5951	19.5642	19.056	14.8921	20.0984	36.8004	5.62771
Rps7	20.2248	19.5632	11.0749	21.7614	18.8913	21.8628	21.0896	15.6399	24.8008	27.8806	6.22721
Rpl21	19.4221	17.9392	11.0141	17.9993	16.8962	18.9739	17.4901	14.431	32.4555	28.5837	7.17016
Chchd2	14.8103	13.2635	10.8793	15.8179	13.8895	13.7272	12.4469	11.0091	7.41061	10.5564	9.10032
Nsg1	7.86558	8.25718	10.8777	6.52774	7.83281	9.03459	10.3783	11.6481	0.738107	1.46428	0.869527
Snrpn	11.0718	9.4379	10.8686	7.20756	10.6487	7.43352	9.4881	10.4627	0.95652	1.24448	1.62621
Nap1l5	12.3376	6.80262	10.8097	10.8738	14.539	9.64805	3.61218	6.18405	1.95743	0.286838	2.49066
Rpl11	19.9173	17.7228	10.7919	20.6677	16.7786	18.6927	20.5319	15.2866	26.9126	27.1401	7.43143
Ptms	10.1759	12.0629	10.7873	9.55524	10.9232	10.4182	12.3511	14.1329	4.32171	5.00911	3.28675
Ndufa4	10.6553	9.88219	10.7392	8.37919	11.4524	10.8032	9.37196	8.5397	4.392	6.18057	8.0768
Ndn	14.2793	11.832	10.7361	20.4294	15.0378	18.4973	10.7248	12.3915	1.18983	3.30759	1.87282
Mapt	8.76687	9.19878	10.7253	5.0278	7.37315	7.93849	12.1568	11.5543	0.596731	1.09183	0.993271
Eef2	15.6001	17.1283	10.594	16.1671	11.8242	14.9417	17.9499	17.7576	9.57259	14.6495	4.05253
Rps5	19.2156	18.2471	10.5171	22.5771	18.1032	22.2288	18.3699	14.5508	24.3267	32.8805	5.78487
Rpl39	18.2503	16.4454	10.4826	18.7882	16.7443	18.2456	18.3139	12.7977	31.6984	32.2838	6.91252
Rpl32	23.4593	20.5013	10.3502	24.4331	18.0913	22.6811	21.296	14.6276	27.8522	33.0795	6.38774
Rps4x	18.7253	17.8928	10.1064	18.975	16.0899	19.0706	17.5928	13.7079	40.8935	37.4576	7.439
Sumo2	12.442	13.9047	10.1015	14.2518	13.9698	13.788	14.3145	14.5293	5.82121	10.5135	4.99384
Hint1	11.9074	9.90992	9.98633	9.69746	10.9956	11.0224	12.511	7.68468	5.70154	5.20044	3.81339
Gm1673	10.3818	10.389	9.9663	11.1886	10.0787	12.0748	9.48273	10.4277	1.42817	2.62492	2.80027
Rpl27a	16.0314	14.0252	9.91633	16.7037	16.4186	16.4375	14.683	10.8622	32.2457	22.5841	6.72794
Cox8a	12.121	10.2844	9.87914	11.1423	11.02	10.8387	10.8462	9.30398	7.32882	9.75844	11.7122
Hsp90aa1	9.24329	10.8608	9.70962	9.0536	8.9822	10.7596	9.02919	12.0389	4.6843	4.36195	2.84345
Rpl8	17.6703	15.6798	9.63883	18.1214	14.611	16.4467	16.315	12.242	22.1796	27.5488	6.72923
Selenow	8.94948	5.70169	9.5566	2.23132	8.66924	6.93068	2.28583	2.55347	2.72331	0.482222	5.50722
Rps15a	16.6846	15.6257	9.5336	18.9314	13.6073	15.5413	18.5972	12.8339	25.4249	31.2915	6.20326
Pgrmc1	8.81861	8.60387	9.51784	10.7224	24.9463	10.4688	10.4507	11.2637	1.61762	6.0417	1.56942
Rps3a1	19.1351	16.505	9.47301	17.3708	16.961	17.1478	16.5845	11.6715	35.151	31.3315	7.04398
Rpl18a	16.2614	16.5974	9.4082	20.6882	15.7033	18.3817	16.3239	14.7141	31.7012	32.061	6.49904
Atp1b1	6.18203	4.94795	9.40403	4.29196	6.39192	5.01377	2.53812	4.56592	0.880373	0.268447	1.04414
Fabp5	12.677	11.2838	9.40121	5.87524	7.56122	9.73239	13.3111	9.13053	2.76001	13.8651	29.5753
Calm3	9.57021	8.90668	9.38223	5.79073	7.67386	6.71656	11.5958	7.7994	3.18822	4.4925	3.26891
Ywhah	9.49345	8.41406	9.36869	7.03947	8.23239	7.91712	8.83318	7.93297	3.6608	3.10657	1.82353
Rps3	17.5965	15.9155	9.34637	17.9404	14.899	15.8257	16.4517	12.1337	25.8885	27.4886	6.18432
Dpysl2	10.2776	8.67689	9.27027	8.16788	8.3094	7.978	11.2261	9.15918	2.73731	2.37289	2.32116
Rpl10	18.7066	19.8085	9.25703	21.6181	16.6483	17.6627	25.3613	16.3723	16.5065	36.4215	4.07481
Pfn2	10.0499	9.70972	9.23526	7.36438	6.32895	7.22505	9.05555	9.06786	0.905681	2.11535	4.08978
Rps11	16.8167	16.0206	9.16957	17.427	14.5113	16.3333	17.2617	12.8985	37.1883	28.4624	6.71498
Rplp1	13.7929	12.3393	9.15993	13.4011	10.7636	11.9617	16.7348	9.7766	28.277	33.378	6.72239
Rps13	14.5244	13.5953	9.15458	16.7386	13.3532	15.6229	14.2208	11.553	17.6171	22.6697	4.87938
Atpif1	12.6337	12.3741	9.10499	13.2265	11.8082	12.5324	16.3793	10.9119	4.94275	7.70973	2.90043
Ywhaq	10.0179	11.328	9.07069	8.50473	9.19132	9.77382	11.5457	11.0936	2.902	5.46774	2.98785
Pebp1	10.8774	10.6108	9.01172	8.89767	9.19119	10.1066	13.0595	11.7336	3.73715	6.77439	4.52074
Prdx2	10.7222	13.373	8.98306	12.213	11.0489	12.1124	16.9749	14.7634	3.1373	8.30782	4.88793
Rps27	17.7282	15.7309	8.96559	27.3363	19.2038	21.4687	17.889	12.5669	25.2049	36.1861	5.81062
Rps18	18.2832	16.2719	8.77889	20.0947	13.4737	16.904	17.3155	11.9716	19.7737	35.5967	5.80801
Tecr	6.91096	6.77736	8.64693	6.30092	7.87376	7.46975	5.19832	6.88231	2.36127	3.84657	6.50893
Celf4	5.47853	5.44598	8.63972	5.66075	6.18857	6.78942	3.81334	8.95487	0.700675	0.622199	0.654081
6330403K07Rik	9.75516	8.98612	8.57313	11.3075	11.2099	13.4425	9.13471	11.298	1.14302	2.01199	1.77292
Rps9	13.8501	13.8829	8.54812	16.842	12.8434	14.3249	15.2196	12.0676	31.2182	28.0179	6.54821
Rps23	16.5838	16.5626	8.54429	19.5168	15.2238	18.0146	18.4253	13.6815	19.9306	31.3528	5.46425
Rps16	15.0612	13.7296	8.52874	17.3356	13.8928	15.8267	15.4395	11.0727	23.2072	26.3262	5.57
Rpl36	15.0089	12.5259	8.52745	16.8396	13.2369	15.3281	14.6099	9.96996	16.846	16.3174	6.26369
Rpl26	16.4641	15.9696	8.49946	18.6673	13.234	16.6474	16.2592	12.8097	16.7019	27.2068	5.01974
Rpl15	12.5269	10.374	8.49804	11.3608	14.3932	13.3206	10.4125	8.16312	22.3964	9.20985	6.55355
Rpl14	15.6784	15.0779	8.4883	17.2383	12.5158	14.1908	17.3204	13.207	11.4821	29.7862	4.10182
Tuba1b	7.8444	7.80526	8.44156	4.83051	5.85007	5.34616	9.08107	6.83466	6.84678	8.70663	1.69198
Rpl35a	16.0614	14.0298	8.38783	20.9898	17.2054	18.4472	13.4457	10.1956	33.382	22.3805	6.46314
Dynll1	8.25673	9.78532	8.38148	9.22054	6.65593	8.00261	8.20859	9.32445	4.0719	10.1589	6.83981
Rplp2	14.5539	13.2567	8.36276	17.7775	13.0264	15.1336	17.0445	11.3912	13.1266	23.9503	4.9545
Gnb1	10.5702	8.96503	8.2581	9.48702	10.0449	10.0115	9.50304	8.99746	3.00606	4.1612	2.81589
Gng3	9.22381	8.97046	8.23829	7.4331	7.96953	8.12349	6.40213	6.87288	0.840917	0.790474	0.876355
Rps14	18.1939	17.4522	8.23638	28.2705	14.9992	20.3246	18.8486	14.8978	13.9214	36.5539	5.4967
Rpl29	14.3603	13.1393	8.16892	14.8214	11.3916	12.792	14.7847	9.95031	16.784	17.6359	4.5307
Rpl24	15.3617	14.7365	8.16421	17.7567	14.5575	17.0257	14.768	11.7262	16.9824	21.699	5.92304
Oaz1	10.1023	9.39934	8.10349	10.7172	10.0966	9.89343	8.06176	8.99155	13.1954	10.758	6.55074
Atp5e	9.34694	8.19961	8.08382	9.8962	8.85786	9.27502	9.93267	7.53205	6.17504	9.22432	5.17943
Cox4i1	10.2758	11.8936	8.0813	11.6584	8.84476	9.77996	13.4757	11.1749	7.64449	13.7475	7.86754
Rpl17	15.0591	15.2136	7.96632	17.824	10.9348	15.0209	17.118	12.6897	9.63164	29.6089	3.35821
Snca	1.35608	1.44776	7.95237	0.460052	0.69704	1.16167	0.979033	0.721828	0.241445	0.165609	0.481021
Rpl35	12.9411	11.8308	7.89094	14.3792	11.1475	13.4143	15.318	9.41265	15.7241	16.811	3.66212
Resp18	7.71032	4.86544	7.88986	6.87425	10.0677	5.76759	2.84398	4.14873	0.864841	0.191886	0.710274
Cd24a	6.83924	13.1037	7.82874	9.65134	2.39699	10.1723	14.9026	24.1025	0.55449	3.59367	0.268456
Rps10	13.768	12.396	7.80603	12.8237	12.3023	13.2269	13.2437	9.41384	29.4884	20.0522	6.55234
Cox6c	8.68627	8.32491	7.77912	8.09968	8.23515	8.22405	9.59654	7.44823	4.72331	9.2044	8.35463
Cox7c	10.7285	10.9325	7.66497	13.0398	12.8638	12.4058	10.9408	9.36638	5.33856	7.21438	8.28556
Gnb2	9.65746	9.12153	7.54447	10.216	8.26953	8.81947	11.1784	9.43254	7.16544	6.49034	4.95509
Marcks	7.3611	8.17274	7.50352	7.22012	8.39625	8.77179	6.31156	9.10383	16.9619	7.71481	10.5544
Caly	6.20937	3.71806	7.4917	5.18377	8.07201	5.75605	2.48198	3.14637	0.618913	0.180744	0.598585
Cox5a	6.58105	7.70409	7.45919	4.81036	5.28595	5.37567	6.91222	6.17661	3.25033	3.31052	5.90038
Rps28	14.0772	12.4296	7.42271	19.7277	15.0685	16.7423	12.7009	9.21362	17.8988	19.7833	4.35703
Map1lc3a	7.57185	7.579	7.41451	6.23118	6.83285	7.06962	7.38347	5.42525	2.13811	4.23376	2.30869
Rpl22l1	10.955	7.61485	7.40641	9.13898	8.51954	8.69561	8.01002	5.11393	5.3924	11.1176	3.6292
Rpl34	14.0671	13.175	7.39204	16.704	13.0846	15.2938	13.4709	9.88708	18.8771	21.4567	5.05595
Rpl18	12.1348	11.2814	7.39198	12.5829	11.5905	12.1222	10.5551	9.09502	18.8417	17.3334	5.75283
App	3.66827	3.57159	7.37633	2.05542	8.01564	3.11522	2.79484	4.15303	1.36052	3.16623	1.92529
Cnih2	5.94449	7.52129	7.35546	7.95262	6.57809	7.01902	7.14925	8.71613	0.466559	1.27999	0.438118
Atp5g1	7.44456	6.29898	7.34893	6.1967	6.24224	6.6638	6.44499	5.49805	3.08161	4.08626	4.16839
Cox6b1	9.13745	9.20141	7.31108	9.48923	7.79569	8.29092	10.4035	8.16618	4.49171	7.78503	5.34848
Rps20	11.5484	9.89754	7.29978	10.5397	10.2992	10.9978	9.80344	7.45531	31.3574	24.1061	5.855
Stmn4	5.48982	7.15756	7.17295	6.50544	5.87973	8.40785	7.55503	8.28459	0.367498	0.658658	0.461221
Rab3a	6.39377	5.27588	7.10412	4.59592	6.08864	6.09187	6.56927	5.25606	0.628395	0.655828	0.950713
Zwint	7.15704	6.36821	7.09905	6.05555	8.1442	6.8428	5.69699	5.72156	1.69717	2.31325	2.02226
Rps26	12.3221	10.9893	7.08366	13.2232	10.1716	11.6921	13.8383	9.24999	10.2454	19.0626	2.88177
Maged1	5.79036	5.73962	7.07415	8.7479	8.31843	7.34031	5.39725	8.48514	1.5621	3.88842	2.51357
Rpl7	12.0991	13.207	7.00322	13.5263	10.2619	13.0953	13.4339	12.5981	18.4713	24.5846	4.68824
Atp6v0b	5.51323	4.92898	6.99126	4.98656	6.93385	5.72592	4.26606	4.69554	5.69496	1.44616	5.95322
Bex3	9.1495	4.91682	6.98058	2.80463	10.531	7.2022	1.82089	2.07708	1.5581	0.223735	2.13078
Eif4g2	7.24302	8.31636	6.88083	8.79198	6.19862	7.00454	9.42195	11.7208	3.76798	5.77408	3.43031
Aplp1	5.06559	5.60354	6.86047	5.1612	5.5829	5.25941	5.78846	7.66937	0.440182	0.61612	2.0118
Bsg	6.15152	5.30969	6.86012	4.92217	6.74778	5.59995	4.62386	4.64201	4.75822	10.9409	5.7412
Hmgb1	6.12017	7.2955	6.85393	9.57474	7.53865	9.4262	6.8854	9.27	7.18181	11.451	3.06547
H2afz	8.83982	9.35512	6.84633	9.37181	9.36122	12.8608	6.11886	8.91232	11.1231	10.8073	3.70384
Atp5b	7.07185	8.45531	6.83703	7.01128	6.48457	6.5805	9.16186	7.63036	3.98848	9.38398	7.60039
Rpl28	9.87048	9.71825	6.80958	11.1791	7.28197	10.0253	9.77535	8.61456	15.7329	22.003	5.31422
Rpl13a	14.9769	16.8647	6.79672	22.6888	9.16082	13.7588	19.4099	14.4947	4.52756	41.7344	2.45226
Rpl4	12.4349	12.2275	6.78304	15.3889	10.554	12.9771	12.4974	10.8252	8.92635	21.5944	3.23075
Rpl30	10.7042	9.15305	6.76976	10.7599	11.8942	11.8001	8.32772	7.03843	26.738	12.0114	6.00881
Rps6	13.3601	14.0101	6.76105	15.48	9.71984	12.5318	14.3223	11.5029	8.29057	24.0231	2.92342
Rps21	11.27	9.12284	6.74113	11.689	12.8784	11.6033	9.08756	6.4191	17.4318	12.5086	4.94897
Rpl10a	11.466	9.83459	6.69878	10.7479	8.52707	10.247	11.1652	7.93321	19.9506	18.6724	4.52831
Nme1	8.5469	8.53445	6.63116	8.45169	7.28428	9.21988	9.82183	8.91828	2.21166	3.54793	2.12327
Rpl31	11.4178	10.7618	6.59458	14.4098	7.43469	10.8125	14.5877	9.57021	5.07498	20.4457	2.84433
Hsbp1	7.06053	6.07484	6.58866	5.76836	5.90561	6.29855	6.92841	6.20656	3.19754	3.75558	2.94424
Ckb	4.274	6.78894	6.57016	3.165	3.75697	4.9233	4.68197	6.09293	19.3462	3.3702	58.8784
Rnf187	6.80918	7.39794	6.5412	5.87962	5.78697	6.59024	6.993	7.88793	2.37235	3.40143	1.6395
Syt4	4.95737	3.44335	6.52773	1.68383	2.57449	3.49984	9.55777	4.85331	0.46332	0.356554	0.425896
Gria2	2.71447	2.49256	6.52605	3.23966	3.65827	3.20822	1.96439	2.72165	0.398824	0.267712	3.84598
Tsc22d1	4.87162	6.80721	6.44489	6.31781	4.51474	7.07314	4.52594	9.33173	1.16297	7.17852	3.40028
Dpysl3	5.2241	7.01076	6.42348	3.54579	4.84994	5.37398	9.54177	8.78017	0.328432	1.32021	0.555296
Scg2	3.40706	2.76916	6.40028	2.84521	11.0338	5.55079	0.822405	2.89169	0.588404	0.171041	0.663855
Ddx5	6.67055	7.58986	6.39987	8.41382	7.60657	7.46954	6.82744	9.68867	9.77493	5.56739	6.02677
Cpe	4.70023	5.39908	6.38532	3.99141	4.74934	4.7929	4.39312	6.47649	1.69314	0.941362	26.4904
Rac3	5.22432	4.54776	6.33302	2.19038	3.85776	4.0911	8.20491	4.59462	0.703323	1.41968	0.505809
Mtch1	8.0733	7.09676	6.30362	5.79054	6.77813	6.70917	7.47321	6.09654	3.20709	5.41839	2.33097
Cox5b	7.51417	6.98673	6.30362	7.03935	7.12888	7.23847	6.86411	5.36882	3.40384	5.31786	5.94574
Mif	9.58677	8.38322	6.30121	7.036	5.82534	6.58123	14.8514	7.49359	2.83049	5.72228	2.34514
Sepw1	9.4949	11.4107	6.2842	11.674	4.45038	5.59393	20.6494	11.6613	0.838905	10.5789	0.864024
Rtn3	5.2108	5.82995	6.23124	4.16602	4.26668	4.43788	5.95731	6.14126	1.98738	2.17521	4.19386
Nsg2	3.71759	4.0038	6.21398	3.19974	3.24361	3.90608	4.34694	5.9687	0.565023	0.502087	0.81107
Naca	10.243	9.84097	6.14457	10.8892	9.91823	10.5357	9.628	8.30068	10.3686	14.303	4.46771
Cox7a2	7.84603	7.67175	6.1327	7.96584	7.34136	8.24477	8.29655	6.84176	3.05869	4.05658	4.64032
Thra	5.33345	4.04056	6.1214	4.5137	4.80564	5.28493	7.46859	5.99153	0.695003	2.13559	1.8188
Jund	8.30395	6.76058	6.12101	8.66454	9.35268	8.55102	5.34782	4.91733	5.33036	3.57742	4.59347
Atp5l	7.50589	6.92975	6.12034	8.16179	7.3846	7.47974	7.60311	5.94056	4.13669	5.40475	4.9589
Cdc42	6.5171	6.9407	6.09902	5.90649	6.28959	6.17002	7.73709	7.05617	9.18349	6.8371	3.75976
Atp5j2	7.9503	7.17496	6.06523	7.97796	7.70967	8.01278	8.28413	5.76657	4.19027	5.79792	4.98463
Rps17	11.4451	11.1081	6.04725	14.5804	8.43858	10.7365	13.8818	8.96498	5.17159	19.997	2.97662
Gpm6a	3.35653	3.44769	6.03027	2.53814	3.92106	3.82071	3.0759	4.40046	0.586044	0.270778	7.24161
Hn1	7.29309	9.25493	6.0129	11.5915	3.29885	6.98453	16.0594	13.3254	0.766217	3.89326	0.335321
Atp5g3	5.71217	5.72552	5.98742	4.85013	5.68794	5.31207	5.50513	4.56639	2.43704	3.85825	3.94826
Cst3	5.60586	4.73409	5.96987	4.43539	6.73956	5.69675	3.91025	3.33218	181.414	6.43717	134.999
Cadm1	1.48906	3.04185	5.96068	2.57557	3.60603	2.46609	0.702265	2.19796	0.741175	0.435115	1.27051
Eif4a1	8.66826	9.44267	5.95983	8.01848	6.73505	7.42061	12.9118	9.75139	7.42318	7.70091	3.48883
Ahi1	7.05538	4.07485	5.94094	5.22978	10.1259	7.38485	3.3535	3.53237	1.00453	0.347392	1.432
Gsk3b	6.27862	6.13203	5.92535	5.4449	5.99922	6.16938	5.35014	6.26407	1.89564	2.11798	2.66886
Fxyd7	2.83297	1.99088	5.90853	2.1953	1.43428	2.17853	2.0546	1.78144	0.319492	0.112038	0.310317
Hnrnpa1	8.36374	9.79203	5.8943	9.52193	8.2479	8.69002	9.64206	10.7199	3.67917	7.92823	1.57354
Nrxn2	3.98427	3.46965	5.88785	3.22213	5.298	4.02233	3.12907	3.35332	0.479703	0.794232	2.60208
Ywhag	5.38638	5.44323	5.88472	4.07109	4.50927	4.14876	5.70393	5.29963	1.2536	1.30857	1.10122
Hnrnpk	6.53724	8.19576	5.85919	11.8122	9.31953	9.83472	7.14426	9.67849	6.11666	6.9216	5.27212
Arf5	5.90652	5.48889	5.8218	5.26101	5.2402	5.23886	7.25445	5.21559	3.91623	7.20918	3.3022
mt-Nd3	5.87842	4.50244	5.81545	3.87974	6.29291	6.09688	3.53275	3.5174	4.06229	2.76403	4.56213
Podxl2	4.02156	3.97106	5.81302	3.69019	4.86239	5.93385	4.36535	5.16492	0.635218	1.44194	0.841959
Cirbp	5.94576	5.34911	5.80486	7.56211	6.56209	7.58574	5.55444	7.63923	1.63679	1.70408	1.96092
Dnaja1	6.30296	6.95407	5.77634	7.04513	6.05456	6.85427	6.58037	8.08088	2.7721	3.6872	2.84079
Rps15	10.058	10.5339	5.72981	14.4773	7.29206	9.93851	12.169	9.61647	4.47242	21.4665	2.95785
Zcchc12	3.68954	3.39089	5.71455	3.78703	5.67743	5.43619	2.40847	6.19421	0.500141	0.345428	0.638188
Morf4l1	7.33613	7.62092	5.67583	7.8696	7.67904	7.50344	7.26323	7.58983	3.88695	5.92994	3.24398
Btf3	8.46259	8.10534	5.6361	8.83015	8.18821	8.89348	9.07197	7.78324	7.48004	11.5122	4.61923
Sox11	8.99828	11.7257	5.59991	12.8243	7.26983	8.87821	16.4547	17.7021	0.483242	3.36836	1.22067
Ubc	4.81606	4.7696	5.58787	5.48022	7.50864	6.40809	4.17387	5.60906	18.0363	5.3476	10.9809
Aldoa	5.09218	4.79361	5.57925	3.32568	3.82617	3.00285	4.40327	2.92851	3.97838	4.58151	5.88001
Slc25a3	5.79505	5.94141	5.56691	5.00351	5.96008	5.41218	5.55971	4.94055	6.81168	7.00916	7.03328
Usmg5	7.19102	6.05098	5.54067	8.36413	6.64237	6.91733	7.631	5.3455	1.71429	3.57495	2.9858
Rps25	9.50816	8.78706	5.52491	11.9548	7.86202	9.50645	11.4462	7.61612	6.92204	16.0354	2.65221
Eef1g	10.3245	9.82714	5.51073	11.3909	6.29811	8.69862	12.5796	8.68572	4.11289	12.1804	2.53126
Ina	6.48786	13.6914	5.50004	4.61735	3.85946	4.70454	9.60092	11.0118	0.27491	1.52226	0.179999
Eif5a	8.13957	7.61379	5.48546	6.32159	6.20491	6.15527	8.05883	6.2938	6.08893	7.95797	2.9263
Nr4a2	0.200727	2.26265	5.46287	0.15367	0.205732	0.13489	0.119265	2.27374	0.133528	0.571284	0.19746
Npm1	8.50323	7.71443	5.45562	8.64927	8.18114	8.48224	7.91467	7.45641	8.88328	13.8701	3.09998
Hnrnpa2b1	4.86994	6.40052	5.44167	6.13712	4.69092	5.28093	5.61664	6.75906	3.26524	5.31588	5.27716
Atp5j	6.64622	6.19315	5.3791	6.71817	6.1527	6.83966	6.34944	5.47052	3.57668	6.61281	4.31681
Mt3	2.74043	1.219	5.33661	0.871671	1.1594	0.903945	1.20976	0.919229	1.07844	0.0838909	16.4571
Rpl7a	8.8345	9.11437	5.33623	9.67872	7.36417	8.74811	10.1786	8.32765	11.7604	12.8428	4.22223
Rtn4	3.85764	4.03692	5.31375	2.72574	3.69765	3.45743	3.56752	4.19787	3.7031	3.68219	1.98392
Ube3a	3.30929	3.20774	5.30332	3.57857	4.06692	3.55592	2.27236	3.32684	1.00345	1.39625	1.59553
Psap	2.92533	3.04894	5.29581	2.18133	3.10621	2.68277	2.204	3.09922	11.3448	2.63534	14.1742
Eid1	5.65888	5.37997	5.29406	4.40085	6.99242	6.64083	5.28447	4.67467	1.39546	2.86927	1.30416
Myl6	5.9402	5.79163	5.27466	5.91492	5.77603	5.24629	5.98782	5.05099	5.46379	8.66213	3.04909
Sox4	5.31918	7.66638	5.25128	8.13708	5.64166	10.2357	6.60203	20.202	2.44767	4.0968	2.45185
Atp5f1	5.92816	6.95583	5.24577	5.74889	6.23791	6.79656	6.65129	6.45533	4.16009	4.67997	5.37051
Atp5h	6.38878	6.66412	5.2136	6.63921	6.27398	6.16281	6.4859	5.86751	4.21481	6.80457	6.02305
Atxn7l3b	6.13307	6.40044	5.20577	7.10088	6.28117	7.2509	7.03921	7.65599	1.5641	3.56815	2.50252
Crmp1	5.42216	6.69016	5.20424	4.15518	4.05231	5.0529	7.13206	7.87948	0.353832	1.04841	0.335527
Ywhab	5.4422	5.25141	5.19534	4.46336	5.23633	5.16017	4.74036	4.97725	2.50643	2.95895	1.73016
Arl6ip1	3.24511	3.46185	5.18367	2.69449	3.95877	3.93292	3.07595	3.94725	3.98687	1.28935	4.17675
Hap1	5.50909	3.26368	5.18365	7.01664	7.62599	6.75826	3.97569	1.96575	1.00941	0.345459	1.32181
Sncb	2.38119	1.46849	5.17564	0.801776	1.22231	1.37058	0.735103	1.30108	0.333808	0.0426359	0.356389
Ndufc2	5.21342	4.52203	5.10185	4.69947	5.42944	5.54241	5.62407	3.5475	2.48144	3.24808	4.32257
Pfdn5	6.69506	6.37243	5.07312	8.0266	7.42111	7.95404	6.54144	5.72779	7.46072	6.88872	3.17414
Tma7	6.95792	6.30283	5.02656	7.22484	5.66094	6.73747	6.30371	5.82072	2.76878	5.76506	1.57484
Elob	5.07914	3.44133	5.00779	1.68582	6.72617	5.42392	0.968198	1.3754	3.38005	0.461444	4.13335
Elavl3	4.93151	5.71136	5.00606	4.96609	4.5211	4.79047	6.53547	6.14185	0.370997	0.806038	0.348763
Rpl23a	7.87635	8.62921	4.99546	12.2816	6.43605	9.02562	11.0774	8.36364	3.571	16.5146	2.70918
Gpx4	5.67171	5.72845	4.9831	4.97313	4.99773	4.51016	5.13125	4.76026	4.32311	5.62047	4.19307
Pbx1	1.8982	2.83254	4.9605	2.47432	1.71723	2.80665	3.61188	2.96471	0.4675	1.59059	2.34466
Uqcrq	5.30237	4.75648	4.9576	4.84006	4.18876	4.20278	5.10245	3.93177	2.86807	3.49141	4.84462
Slc22a17	3.25016	2.44911	4.94881	2.47013	3.43681	2.64671	1.9092	2.78172	0.732208	0.97418	4.05501
Atp5a1	4.87294	5.95224	4.94391	5.19388	4.95958	4.91225	5.20298	5.47809	3.63974	6.23571	5.74057
Gabarap	5.3341	6.57866	4.94321	5.25459	5.44119	4.69124	5.95212	5.75339	7.21026	9.39723	3.73773
Sub1	8.9064	7.96554	4.93079	10.9288	7.71494	8.87518	7.12893	6.70479	3.51007	5.84949	2.50761
Eif4a2	5.88333	5.57934	4.91999	6.75503	5.72102	6.01936	6.425	7.1514	1.74304	4.3757	2.42409
Ank2	2.71621	2.66613	4.89738	1.71844	2.99087	2.34733	2.67735	2.36644	0.4853	1.09873	4.41531
Zcchc18	3.42024	2.70956	4.88943	2.74347	4.14881	3.82379	2.17783	2.31481	0.543908	0.272818	1.5098
Tspan13	3.53531	6.26422	4.88193	3.13133	3.33513	3.1977	3.99522	6.89753	0.745174	1.36114	0.444476
Ptov1	8.07671	7.68987	4.86827	9.73108	7.09839	8.42766	8.08453	8.63652	2.78754	6.73188	3.49438
Rps12	9.19375	7.98987	4.86395	8.76838	7.64866	8.02196	9.84816	5.93354	22.0919	19.4263	3.73481
Ap2m1	5.4092	6.03399	4.85586	4.95973	4.03472	4.38961	6.83191	5.90426	2.47253	4.17288	1.85188
Clta	5.78571	5.59114	4.84282	6.01773	6.53798	6.92318	5.62453	5.38602	16.8304	5.64221	3.09964
Itm2b	3.71829	3.81035	4.79013	3.7048	5.19052	4.46114	1.63541	2.56394	49.3438	9.81619	17.6103
Syp	3.24795	2.32466	4.78827	2.0326	3.11988	2.54943	1.90462	1.99413	0.385478	0.138947	0.363502
Kcnq1ot1	1.81064	1.5197	4.77547	1.46693	2.29775	1.75124	0.819817	1.14158	0.786483	1.99565	2.13642
mt-Nd4l	4.3768	3.3614	4.7543	2.63036	6.30525	6.22305	1.78586	1.93593	4.58342	1.49137	6.28475
Vamp2	4.54888	3.89267	4.73388	3.28076	4.51183	4.10983	3.61096	3.58914	0.705832	0.77667	1.94567
Evl	4.32968	5.09513	4.71796	3.83155	3.77645	4.67339	6.28925	6.41509	1.96667	1.70078	0.557364
Gabarapl2	5.51548	5.16233	4.69634	5.69385	5.5871	5.6497	4.6541	5.1258	2.44919	1.69608	2.29258
Pkm	5.75168	6.56718	4.68155	5.42536	4.13452	4.67618	5.58475	7.19507	5.01909	4.69636	4.5743
Serinc1	3.15512	3.08406	4.65704	2.66763	3.55531	3.30374	2.49505	3.14624	1.52523	1.35787	4.52515
Srsf3	5.47527	5.93024	4.65619	6.45458	5.60949	6.1863	6.41796	6.86269	4.77187	5.48576	3.11387
Rpl36a	7.05816	6.66336	4.63385	6.56148	6.41447	6.49355	7.86483	5.35574	8.93715	14.5092	2.60549
Sec61g	7.33634	6.68757	4.58902	7.93311	7.36611	7.19975	7.61022	6.46696	3.98892	9.49652	2.84465
Ran	6.50542	6.22648	4.57267	5.14852	5.16647	5.11818	6.59441	6.36743	4.5833	6.14859	3.00999
Cd200	2.82959	2.9767	4.55367	2.5213	3.59623	3.71237	3.20719	3.45459	0.254912	0.318499	0.354367
Rab6a	4.55018	4.40776	4.55085	3.40471	3.44472	3.2409	4.40876	3.61863	0.899176	1.78661	1.85277
Eef1b2	7.29899	6.36172	4.51928	6.42416	6.17058	6.02908	7.32437	4.82778	8.59549	7.31348	2.46978
Rsrp1	3.33568	3.33662	4.51478	4.80879	4.54394	4.39566	3.50514	4.36507	5.63602	4.00185	5.26274
Uqcrh	5.70273	5.63408	4.50916	6.51753	5.83197	5.77248	6.20529	5.01216	4.48471	7.37979	4.23371
Cox6a1	5.68819	5.96407	4.50475	5.64806	3.72114	4.2453	8.9685	5.77603	1.73387	4.6103	2.39087
Bex1	6.13792	4.7344	4.49731	5.53981	5.90585	5.77819	5.45917	4.1655	0.596078	0.995839	0.664105
Atp5k	5.03978	4.82291	4.4915	5.64845	4.9052	4.84084	5.48931	4.34786	1.74033	4.13401	3.03856
Atp5c1	4.96694	4.93497	4.48205	4.73227	5.17962	5.44845	5.87999	4.52518	4.01551	5.12436	4.56444
Reep5	3.82107	3.14885	4.47172	2.32042	3.00778	2.41822	5.52725	2.87376	3.0778	2.93987	2.4575
Mdh1	3.48653	3.71656	4.44926	3.43593	4.37728	3.92178	2.92428	3.15876	2.33796	2.51273	3.28161
Dynlrb1	5.6391	5.6107	4.43428	6.10897	4.41795	5.06218	7.31473	5.73649	1.72688	3.85172	2.03392
Nrxn1	2.6809	2.94185	4.42729	2.31898	2.79323	3.85077	2.4686	3.72326	0.416795	0.273697	11.1121
Hmgb3	5.65158	5.44991	4.42535	5.75746	4.83311	6.04465	9.98361	6.66802	0.835879	2.64528	0.900656
Rbm3	5.07619	4.66055	4.42092	3.43565	4.97876	4.45494	6.32922	4.01349	7.6191	6.5249	2.70215
Peg3	7.34647	3.63997	4.40911	6.43622	5.00977	5.85559	2.41616	2.24672	1.0584	1.96464	1.42896
Nedd8	4.79545	4.57296	4.40262	4.2237	3.55744	4.07357	4.52467	4.50418	3.44155	4.66585	2.32129
Klc1	4.74845	5.64962	4.39515	3.54044	3.91118	4.03891	4.90246	4.98644	0.689397	1.31866	1.01201
Vdac1	4.07825	4.05669	4.38828	2.60955	2.9123	3.1107	4.13375	3.96748	2.14608	3.78012	3.31761
Cox7b	4.61788	4.34453	4.3846	4.44482	4.33565	4.18272	4.35785	3.74632	1.76926	3.16771	2.8738
Camk2n1	1.26866	2.23993	4.37593	2.51712	1.80334	2.08309	1.22007	2.70395	0.856392	2.09616	1.77855
Fkbp1a	6.3135	5.96149	4.35304	4.97414	4.01608	4.61407	5.91294	4.8945	2.07793	4.84252	1.84396
Rpl12	7.66657	6.37893	4.33337	6.40322	6.03612	6.95038	7.01483	4.52287	11.6079	12.5687	2.2974
Atp1a3	2.24534	1.96693	4.33321	1.572	2.59506	2.19878	1.59596	1.73679	0.372697	0.237706	0.358833
Gabbr1	3.04405	3.73868	4.31984	2.37818	2.86436	2.6847	2.36617	2.54905	0.751186	0.701292	7.25863
Calr	3.1998	3.29973	4.29595	2.43724	3.12809	2.64336	2.78908	2.91966	3.67036	5.23409	4.72531
Vapa	4.7404	4.36227	4.26844	4.07187	4.90029	5.02998	3.84467	3.96445	3.44803	2.50212	3.10043
Ywhaz	5.3263	4.51899	4.26347	3.98858	4.7464	4.14593	4.4551	3.774	1.7167	1.78235	1.74244
Aes	4.15515	3.57727	4.25828	3.20504	4.85974	5.34612	7.23978	4.19701	2.67469	3.31467	2.57215
Uqcrb	4.95692	4.78459	4.24648	5.53468	5.25281	5.52507	5.0739	4.20372	2.99352	4.70182	3.74391
C1ql1	0.0608631	0.4464	4.2447	0.0281236	0.0474058	0.0167978	0.0956916	3.02503	0.0996195	0.127228	0.052226
Camk2n2	2.71025	1.68619	4.23227	0.798226	2.00252	2.04147	1.28551	1.20943	0.403946	0.124472	0.421334
Cisd1	2.48645	2.77139	4.21137	2.28492	3.01012	2.72697	2.10525	2.60404	0.658281	0.75638	2.16199
Swi5	5.05649	4.93862	4.1905	4.81746	4.28276	4.79398	5.02208	4.43021	2.41267	4.98598	2.22502
Uqcr11	4.9867	4.2226	4.18372	4.59668	4.2691	3.94945	4.9637	3.37112	2.88199	3.92471	5.80494
Srsf2	3.88828	3.91589	4.18089	4.40978	3.6637	3.98881	4.43755	4.59454	5.72894	4.66327	3.47006
Cspg5	2.10472	1.64852	4.16409	1.09716	2.18142	1.9409	1.55813	1.50463	0.622349	0.334602	12.9635
Dner	1.77101	1.7503	4.16048	1.08255	2.42336	1.38186	2.27326	2.07653	0.265561	0.26527	2.04565
2010107E04Rik	4.93329	4.70552	4.15306	4.64726	4.47747	4.50092	5.61498	4.15284	2.71416	4.07485	3.05002
Atp6v1g1	6.17338	5.95434	4.15188	5.85726	5.71033	5.76261	6.42576	5.67483	4.04165	2.92961	3.01109
Gm47283	0.97358	0.652067	4.1465	0.340581	1.59863	1.22305	0.201388	0.312559	1.1072	0.0984671	2.6256
Hmgn1	5.44761	6.46806	4.11853	10.4753	5.23057	7.43734	5.91285	9.17499	4.19702	9.40963	2.71557
Tbca	5.60096	5.12252	4.11598	12.6535	4.90161	5.53102	5.6537	4.10653	2.54791	3.62132	1.43854
Ndufb8	4.4429	4.60027	4.10998	3.96119	4.55918	4.40055	3.85113	3.56978	2.35061	3.05961	3.59081
Dclk1	2.55653	2.52613	4.10406	2.5014	2.8318	2.49394	2.97713	3.2215	0.381651	0.663701	5.99672
Scg5	3.63488	2.92533	4.10405	3.48531	4.8474	4.58716	2.13181	3.18493	0.352488	0.180445	0.669639
Selenom	1.37371	0.869496	4.09532	0.489399	1.70079	1.0686	0.717163	0.899687	0.370713	0.245846	1.12867
Dnajb6	4.18499	4.32737	4.09207	4.79735	4.55781	5.23312	3.98521	4.9158	1.59114	1.57001	1.42129
Ubl5	5.35324	4.71382	4.08498	5.42578	5.22325	4.59859	6.20334	4.24373	3.40422	3.62388	2.68287
Map2	2.13083	3.1943	4.07752	3.6578	4.04027	3.34059	2.3059	3.54484	0.398952	0.432483	1.97232
Atp5d	3.88334	4.09337	4.06466	3.95122	3.57801	3.40493	4.41927	3.76	3.67925	5.65531	4.64276
Rbm39	3.63047	3.81309	4.06206	5.51134	3.88385	4.3102	3.77072	5.10138	3.56842	4.43162	4.79142
Pgam1	4.09747	3.68856	4.05996	2.87252	4.27855	3.35596	3.41817	3.30861	2.91964	3.24892	3.79938
Morf4l2	6.06034	5.17997	4.05868	6.59357	5.17645	5.34154	6.44147	4.90518	1.48902	4.49394	1.78207
Pafah1b3	4.61897	5.55179	4.04446	4.37603	4.29888	4.66647	7.39695	5.65577	0.833331	1.96444	0.450986
Psma7	5.80898	5.99365	4.03532	6.22202	5.13055	5.50045	5.3271	5.90551	2.25904	3.99757	2.00488
Matr3	3.59242	3.48507	4.02267	3.78935	4.44002	4.31956	3.43266	4.36999	1.38979	1.74546	1.59497
Inpp5f	2.12766	1.83106	4.01662	1.72798	2.10037	1.95207	2.04209	2.09232	0.305493	0.285493	0.386373
Ndufs5	4.74522	4.30887	4.00225	4.32834	4.83273	4.49152	4.48441	3.51204	1.76337	2.69806	3.33993
Tomm20	5.32624	4.38274	4.00074	5.36115	4.57119	4.36862	4.09734	3.97069	2.54385	3.65855	2.37786
Ank3	2.55072	2.99553	3.99387	2.67337	3.40429	3.28429	2.25185	2.96821	0.312396	0.44715	0.233319
Mrfap1	5.72906	4.85194	3.98797	6.34699	6.00981	6.15588	3.95451	4.42807	5.09653	6.86341	3.09026
Pcdh17	1.96722	1.58232	3.97323	1.17181	1.72755	1.98002	0.49329	1.25396	0.309075	0.105086	2.60258
Hmgcs1	3.40007	3.99088	3.97085	1.83016	2.10792	2.25532	2.69453	3.64104	0.749555	1.0186	4.26537
Tspan3	3.65809	3.73792	3.96691	3.88132	3.97423	3.67189	3.53783	4.30909	2.10133	3.17878	8.64481
Ndrg4	2.41017	1.92116	3.96581	1.50541	2.05428	1.93228	1.83958	1.71877	0.476117	0.218754	0.612993
Dynll2	3.91453	3.62234	3.96214	4.45855	3.65274	3.85724	4.21982	3.745	1.31867	1.08761	1.23342
Serbp1	4.36643	4.80633	3.9613	4.14969	4.00822	4.35756	4.59222	4.63376	3.18197	4.6209	1.92231
Rab2a	4.05207	4.09433	3.96093	4.09664	3.98278	4.36136	4.10058	5.0083	1.83147	2.6094	2.34545
Psma3	4.17572	4.3879	3.95889	3.92931	4.02636	4.15445	4.92786	4.35069	2.50302	3.41198	2.59584
Rpl27	6.72257	6.10415	3.93076	9.90781	6.37653	7.44428	8.32081	5.6646	4.9859	7.33387	2.2744
Erh	5.53101	6.55841	3.91492	7.90524	4.50977	5.76394	8.4196	7.27073	1.99302	6.10469	1.88405
Gm42418	2.53949	1.90631	3.89399	1.22547	3.94759	2.79438	0.963231	1.10007	4.34829	1.03015	5.99996
Olfm1	2.04941	3.68574	3.87236	1.66768	0.647389	0.857919	1.50482	2.87402	0.216808	0.686099	0.427139
Srrm2	2.92781	2.89707	3.86591	3.39229	3.50124	3.23675	2.3536	2.9634	2.78197	2.7656	3.99841
Ndufa13	3.88957	3.61865	3.85642	4.39679	4.31394	3.58662	3.43861	3.22602	2.96929	5.35565	4.47497
Cycs	3.68952	3.65876	3.8488	3.28847	3.19589	2.96333	4.14833	3.32942	1.32456	1.79776	2.69904
Gdi1	3.67231	4.74697	3.83673	3.67888	3.29411	3.39254	4.78312	4.79292	0.634039	1.26112	1.78468
Cd81	3.10955	2.64702	3.79021	3.40477	3.8535	3.31462	2.55191	2.32147	16.2701	10.2507	39.3461
Npdc1	4.01267	3.48351	3.75972	3.24706	3.7922	3.61336	3.65486	3.31703	0.329505	1.03469	1.81069
Set	4.96774	4.69504	3.75263	4.57019	4.76892	4.82586	4.38557	5.16347	2.67933	3.67139	1.37786
Arf1	3.61871	4.10336	3.75061	3.73903	3.95442	4.06543	4.03411	4.11065	4.39023	3.72741	2.1005
Fus	2.33865	2.66539	3.74868	3.24156	2.85654	2.77372	2.62365	3.14037	2.20867	2.86051	2.84544
Uqcr10	3.92272	3.40087	3.73665	3.70812	3.75978	3.62549	3.76435	2.78006	2.31013	3.63065	5.21967
Gng2	3.39056	3.27303	3.723	2.53	2.94356	3.14015	4.63123	4.04301	1.27609	1.32249	0.422315
Gnao1	3.34235	2.91679	3.7042	1.63127	3.47795	2.6866	2.83452	2.43523	0.354195	0.467772	1.32655
Mycbp2	2.43993	1.88801	3.69661	1.75803	2.70153	2.11986	1.49645	1.69063	1.27774	0.689095	1.1235
Ndufa11	3.4915	3.46307	3.69593	3.3904	3.84684	3.60501	3.80821	2.84509	1.4808	2.85399	2.60142
C1qtnf4	2.40412	2.2055	3.66969	2.26073	3.74967	3.69392	2.45914	3.13566	0.26099	0.376866	0.313713
Dad1	3.34306	3.18006	3.65555	3.84715	3.35955	3.24839	2.98721	2.91456	2.48513	3.65809	2.82924
Nenf	4.95201	3.1527	3.65536	3.71859	4.25676	3.41523	3.25282	2.47234	1.34665	3.40096	1.45706
Vdac3	3.99827	3.88198	3.64776	3.20152	4.64715	4.70941	3.56978	3.40439	1.84887	1.97761	2.58999
Dbn1	3.06324	3.55616	3.63925	3.81964	3.77804	4.32189	3.20298	4.80743	0.379758	1.7634	0.9296
Ptprs	2.14166	2.01209	3.63802	1.94803	2.94042	2.52112	1.52487	1.98602	0.661933	1.31578	1.81968
Kif5c	3.6152	3.77802	3.62184	3.78169	3.2333	3.555	2.76384	4.20051	0.27262	0.588381	0.221226
Pfn1	6.78595	6.00057	3.61794	5.61934	3.94578	4.04087	6.77841	4.9381	14.6247	14.6528	4.11523
Ndufb2	3.66591	3.15991	3.60955	3.37545	3.89904	3.46166	3.30413	2.55613	1.22212	2.31682	2.27738
Tcf25	3.64804	3.20995	3.60718	2.80423	3.51112	3.19161	3.2743	3.2332	1.6481	1.82304	2.29482
Tceb2	5.38288	6.57686	3.60316	9.62383	3.59036	4.97344	10.2337	6.85486	0.788075	8.03259	0.557212
Ranbp1	4.47864	4.39331	3.59559	3.84118	3.6678	3.84342	4.37657	3.74209	2.68236	4.09194	1.67502
Ndufab1	4.14069	3.78336	3.58952	3.88221	3.67309	3.87866	3.47609	3.24917	1.88614	2.3906	3.09003
Ap2s1	3.71617	3.66223	3.58695	3.86909	2.90492	3.54144	4.89835	4.0804	2.04467	3.26689	1.28784
Chd3os	1.92684	2.34954	3.5783	2.75909	2.65607	4.31403	1.93969	3.15783	0.368377	0.4066	0.227719
Rbx1	4.87843	4.77354	3.57312	5.55801	4.30633	4.59062	4.77413	4.40677	2.8191	4.49244	2.53347
Serf1	4.28244	5.40073	3.56019	3.83333	4.14898	4.96326	7.00097	5.61537	0.553102	2.06185	0.527595
Pak3	2.61995	2.13024	3.54588	2.04301	3.84939	2.83823	2.28151	2.74825	0.340955	0.254359	0.400556
Ndufa5	3.76313	3.3763	3.5335	3.72521	4.31638	4.46223	3.26062	2.94967	1.25905	2.33056	2.27679
Ndufb9	4.21481	4.40262	3.51206	4.17993	4.29775	4.40214	4.02565	3.95898	2.28268	3.34638	5.46206
Elavl2	0.73594	1.61518	3.51011	0.874301	1.12667	1.18386	0.663846	2.92456	0.143926	0.172294	0.242217
Psmb6	4.18733	4.53879	3.49865	4.71629	4.26238	4.22429	4.34166	4.20711	2.55416	3.99224	2.70928
Nav1	1.89837	1.70699	3.4985	1.82613	2.54179	2.20763	1.92005	1.89222	0.470937	0.668201	0.720878
Hist3h2ba	3.76082	5.756	3.48026	6.39912	2.68392	4.47967	5.00752	11.6158	0.302101	1.50423	0.242552
Eif1b	4.28566	4.27481	3.47328	4.82781	4.58172	4.84804	4.43094	4.42121	2.32021	2.64443	3.06564
Ppp3ca	2.32495	2.33361	3.47176	1.7796	3.48941	2.82068	2.90469	3.23536	1.39301	0.897817	2.64808
Nptn	2.1532	1.51766	3.46821	1.3952	2.34842	1.79296	1.43109	1.55679	2.25092	1.1296	2.44008
Chl1	0.630605	1.48238	3.46193	0.547437	1.99264	1.59906	0.313443	2.12046	0.16148	0.131024	1.72365
Arhgdig	3.39396	2.11977	3.45839	0.997265	1.88688	2.309	2.34631	1.30584	0.35032	0.12126	0.295555
Jpt1	3.36208	3.00073	3.44509	1.22705	5.99485	6.00608	0.409678	1.00772	2.28338	0.101201	0.753856
Ppp2ca	3.33862	3.31464	3.44151	3.25434	3.64106	3.58481	2.87802	3.31542	2.30145	1.89689	2.7086
Ndufb5	4.30789	3.98157	3.4262	4.62255	4.57362	4.70111	3.89739	3.27714	2.35708	3.92232	2.93139
Calb2	1.80734	2.3286	3.42579	0.6056	1.34979	4.17432	1.27168	3.37395	0.380044	0.0382377	0.407022
Ntm	1.02619	2.2829	3.41842	2.99058	1.85129	2.02645	0.866806	1.91576	0.305319	1.93664	2.77216
Ttc9b	2.67842	2.53071	3.40948	2.10696	2.96827	2.5928	2.56402	1.89718	0.327238	0.168306	0.345621
Gpi1	2.85214	2.79942	3.40365	2.19624	2.84941	1.89147	2.13114	1.67938	2.73992	2.25809	2.79379
Srp14	4.17714	3.78901	3.40111	4.21456	4.11523	3.48475	3.66788	3.44818	2.54584	2.53162	1.78093
Snap47	3.01846	2.77725	3.38855	2.34315	3.37665	3.66722	2.4953	2.95471	0.61086	0.881271	1.14455
Lsamp	1.5541	1.78032	3.37672	1.09558	2.84207	1.96005	1.27624	3.9294	0.311355	0.162392	6.00336
Fscn1	4.4109	5.07584	3.37534	3.66703	3.15789	3.42139	5.04746	6.18087	2.82554	4.51387	0.487972
Syt11	3.35279	2.58278	3.37364	2.7051	2.95789	2.75999	1.77282	2.15848	0.492073	0.314303	4.88223
Rufy3	4.04697	4.44059	3.37348	3.56629	4.01025	3.81391	3.49149	4.06649	0.475535	0.585335	0.865723
Tusc3	2.57535	2.45183	3.37296	2.15967	3.87164	2.97199	2.16611	2.4767	0.664901	1.45621	1.64281
Rmst	0.839263	1.15406	3.37225	0.501284	0.460602	0.555827	0.402199	2.73375	0.0929596	0.194797	0.27687
Epha5	0.708308	0.849083	3.36612	0.30573	0.845161	0.343465	0.713387	1.01531	0.0999072	0.105583	0.403372
Kif1b	2.69657	2.51874	3.36254	2.38033	3.2304	2.87191	2.16759	2.12343	0.660903	1.02705	3.94485
Chgb	1.75038	1.7074	3.35963	1.39002	4.2691	2.39411	1.23528	4.4002	0.220665	0.138021	0.225881
Ngfrap1	5.67186	6.53596	3.35904	11.6145	3.50478	5.54775	8.87252	5.65698	0.616032	5.33735	0.409456
Fnbp1l	1.93998	2.25403	3.3587	2.34766	2.33595	2.89425	2.88575	3.13306	0.352982	0.56837	1.1052
Dstn	4.07743	4.33498	3.35739	3.79181	2.64476	3.54322	5.14493	3.8297	1.61429	2.99028	1.49309
Anapc5	3.21449	3.38213	3.34554	2.89477	2.92262	3.04916	4.45672	3.3488	1.26468	2.7382	1.05154
Prmt1	3.6361	4.75871	3.34496	4.45923	3.9064	4.54298	5.33855	5.31556	1.4094	2.86909	1.11467
Zfp428	3.05767	3.14044	3.33143	2.86073	2.74474	3.46211	5.41821	4.32344	0.318939	0.831215	1.53282
Ndufa7	5.04073	4.63583	3.32562	5.29688	4.78912	4.84791	4.74379	3.81057	2.72346	4.43637	3.12906
Cmpk1	2.72432	2.84773	3.31625	2.62439	2.60708	2.66689	3.294	2.7842	1.72827	1.37073	0.950263
Psmb1	4.1387	4.30464	3.31567	3.75143	3.71375	3.67853	3.74024	3.82888	2.97448	4.01573	2.88149
Eif3h	4.53744	5.07888	3.3073	5.25885	4.83373	5.94012	5.04378	4.57732	4.28465	5.93357	1.91238
Rpl5	5.07224	5.2652	3.29179	5.16707	4.0218	4.45705	5.19886	4.78902	4.95055	8.63629	2.12272
Cbarp	4.30109	2.34638	3.28294	2.51166	3.23574	2.46408	2.21154	2.30473	0.566577	0.279157	0.898662
Rabac1	3.04223	2.66441	3.27865	1.95745	2.8113	2.2387	2.81936	1.93346	1.76302	2.82633	2.55722
Hspe1	5.09527	3.87246	3.27163	4.58823	3.9522	4.288	4.43995	3.13698	3.48779	4.27054	2.8452
Atxn10	3.35375	3.89577	3.27102	3.28225	3.99455	3.80957	3.34047	4.05981	1.82501	3.03443	2.41325
Ube2d2a	3.69739	4.17661	3.27084	3.78358	3.00592	3.30862	4.02205	4.78934	2.4981	3.12251	1.94474
Nefl	3.34931	9.14983	3.26769	0.542416	0.966408	1.49997	0.420918	1.19729	0.363405	0.394049	0.23757
Hnrnpdl	3.01143	3.34711	3.26574	3.20321	3.14009	3.06692	3.30379	4.10411	2.13812	2.72889	2.0867
Atp6v0e2	2.58931	2.10095	3.26368	1.70524	1.93725	2.38282	2.03402	2.2561	0.303733	0.324562	1.19771
Fkbp3	4.10734	3.5777	3.25537	3.08916	3.51132	3.38392	3.21828	2.63329	1.36069	2.48224	1.4865
Map1lc3b	3.29605	3.9337	3.25516	3.0642	3.34546	3.28624	3.71068	4.40682	2.47488	2.56394	2.54081
Lmo4	0.179748	0.448087	3.24444	0.655665	0.286028	0.350713	2.12392	0.675281	0.759497	2.82074	1.13188
Psip1	2.87768	3.24997	3.23264	2.91553	3.04867	3.16712	3.16994	4.16427	0.762599	2.02449	1.23612
Ctbp1	4.22834	4.51638	3.22842	4.70624	3.44347	3.58211	4.84333	5.22557	1.70196	2.90281	1.67895
Mdh2	3.32522	3.87825	3.21659	3.32734	3.24469	3.39809	3.32227	3.46716	1.89701	2.53581	3.83657
Stxbp1	2.55716	1.98229	3.21443	1.57145	2.3644	1.934	1.81358	1.8941	0.492623	0.443685	0.678214
Serp2	3.75857	3.11001	3.20731	2.8499	2.80569	3.57221	2.61508	2.25114	0.374364	0.43253	0.483597
Celf2	2.7105	2.46061	3.20679	2.50152	1.67488	2.31134	4.17512	7.2436	1.92802	1.58647	2.4958
Tbcb	3.20124	3.3292	3.19872	2.82355	2.85847	2.62115	4.20994	2.85004	1.35	1.78517	1.47095
Serf2	3.94426	4.76434	3.18837	4.03062	2.17191	2.46144	5.63998	5.23181	8.7297	14.6765	4.80927
C1d	3.249	3.22222	3.18726	2.84882	3.68423	3.73623	2.38397	2.96974	1.0833	1.63967	1.27882
Cntn1	1.10993	0.988595	3.18587	0.38661	1.17279	1.02956	0.369954	0.736466	0.280174	0.0486423	0.290861
Erp29	3.47452	2.98454	3.18396	3.20419	3.75069	2.87445	2.80394	2.61818	6.21415	3.36967	2.96
mt-Nd5	2.90878	2.33068	3.1786	1.99089	2.87782	2.76605	1.9282	1.95685	2.66715	2.38477	5.11058
Prmt2	3.3596	3.03792	3.17755	3.05327	3.51041	3.26481	3.13075	3.30262	0.458482	0.954074	0.842914
Eif3f	5.58155	5.96408	3.15416	6.87796	4.91783	6.34448	6.45994	5.26291	6.31534	8.95274	2.07929
Park7	3.75902	3.3956	3.14838	3.06786	3.48437	3.71192	3.91976	3.4556	2.85759	2.73091	2.09687
Sptbn1	2.29397	1.96704	3.1459	1.58713	2.81407	2.14761	1.84083	1.68445	0.569659	2.99952	1.51041
Tagln3	4.50892	6.11982	3.14465	5.57002	3.55577	4.55057	4.2175	5.43076	0.333116	0.671162	0.501939
Ndufc1	3.8815	3.47612	3.14122	3.82188	3.52191	3.57953	3.49772	2.86345	1.45166	2.52999	2.21749
Atp2b1	1.60574	2.84276	3.14099	1.44654	2.42796	3.6629	1.33344	1.56026	1.65026	0.666189	1.26432
Araf	3.15548	2.70219	3.13969	2.86361	3.40104	3.12098	2.02828	2.4441	0.626726	0.911718	1.39683
Pfdn2	4.06751	3.80258	3.1391	4.57786	4.13815	4.33893	3.5128	3.70358	1.58283	1.78729	1.00538
Camta1	2.53524	2.32267	3.13892	2.32069	3.35798	3.29274	1.97678	2.6742	0.645057	0.731919	0.845133
Psmb5	3.46628	3.42551	3.13072	3.27617	3.53394	3.76608	3.37255	3.01745	1.92311	2.51624	2.48052
Cbx3	3.98309	3.82491	3.1241	4.78454	4.37381	4.50932	3.67211	4.01313	2.04884	2.58805	1.74672
Atp5g2	5.97853	5.77633	3.12145	6.54543	6.56717	5.90764	4.71461	3.71675	7.9082	7.51665	5.01655
Ube2n	3.44006	3.51605	3.11603	2.88486	2.83508	2.78399	3.78625	3.36784	1.89196	2.42416	1.98157
Paip2	4.16771	4.70682	3.11432	4.33081	4.15544	4.3225	2.89758	4.91584	1.8845	2.73512	1.97066
Snrpd2	3.85361	3.64046	3.10292	4.13051	4.02965	4.38116	4.04587	3.7027	1.96404	3.96686	1.88454
Selenok	3.85979	2.29585	3.10124	1.3844	5.082	3.81496	0.528806	0.95883	3.39302	0.364821	4.754
Ypel3	2.34739	2.18576	3.09964	2.65089	2.89545	2.674	1.67553	2.72468	2.81542	1.37207	1.17269
Ube2s	3.5477	4.01	3.09877	4.40266	2.92715	3.76442	4.04499	4.18248	2.63709	3.33324	1.41389
Edf1	3.76882	3.59685	3.09747	3.6494	3.40728	3.3581	3.25299	3.30814	2.63518	3.30831	2.61911
Hsp90b1	2.22516	1.93509	3.09525	1.7896	3.16722	2.20282	1.5364	1.81607	4.7368	3.12374	5.69963
Fez1	3.52992	3.64329	3.09337	3.82149	3.87135	4.2009	4.25319	4.53979	0.469253	0.814774	5.34648
Myl12b	3.20505	3.02985	3.09095	2.4712	2.86805	3.29411	2.84235	3.06875	2.86982	1.92774	1.09148
Alcam	1.38865	1.57458	3.0837	0.384436	0.626998	2.50222	0.316644	0.552363	0.326785	0.838144	2.45309
Ube2d3	4.04548	3.9297	3.0732	4.24245	3.1404	3.31308	4.03177	3.85976	3.64014	4.35024	2.51064
Stub1	3.07865	2.79868	3.06877	2.99515	2.72778	2.95452	2.42646	2.54171	1.73291	2.19113	1.77356
Tcf4	0.707149	0.568853	3.06452	1.19738	0.718127	0.609752	0.957658	0.602412	1.91051	3.38397	3.60772
Hras	3.28286	2.79314	3.06355	2.25229	2.60501	2.83535	2.61	2.12024	1.91641	1.07786	1.183
Mlf2	3.33509	3.92487	3.05633	3.79073	2.71772	3.02312	3.92141	4.4035	1.51362	3.04275	2.89085
Vdac2	4.07648	3.93864	3.04998	3.33696	4.3519	3.98151	3.13956	2.82597	4.22401	2.63787	3.90699
Nap1l1	2.85976	2.70032	3.04588	2.93765	2.44533	2.51753	2.97029	2.58415	1.8387	8.44534	1.25834
Myt1l	1.21255	0.9348	3.04376	0.747069	1.43091	1.46726	1.38252	1.39542	0.13941	0.135922	0.147678
Pcp4	3.60049	5.10177	3.04077	2.68622	6.02405	1.4475	3.03418	2.42048	0.567109	0.232165	0.64505
Cd47	1.49486	1.35474	3.03846	0.986941	1.86954	1.44393	0.503152	0.946268	1.52824	0.846124	1.96309
Cacybp	3.31482	3.12049	3.03149	3.28319	3.32345	3.69259	2.32889	3.16167	1.17366	1.20453	1.28235
Rab6b	2.51591	2.41836	3.0239	1.66013	2.22319	2.199	1.91256	2.15876	0.588913	0.367135	0.524361
Arl8a	2.68242	2.63763	2.9972	1.67784	2.70089	2.86013	2.50496	2.41636	0.962546	0.613193	2.08837
Ndufa3	3.95558	3.66724	2.99375	4.94348	3.6605	3.6334	4.39814	3.03935	1.62001	4.50703	2.11773
Ube2m	3.2643	2.52454	2.9931	1.71676	2.92721	2.94262	1.64946	1.65586	1.92105	1.29191	1.79451
Ndufv3	4.13052	3.51887	2.97914	4.44938	3.33025	3.63539	3.70621	3.06806	1.58463	3.0248	1.60454
Smdt1	4.64545	4.14145	2.9709	4.52726	3.50489	3.52339	5.18148	3.32586	2.59193	2.91224	3.4378
Ube2e3	3.21652	4.94633	2.95881	3.23774	2.49585	3.40825	3.12537	3.84651	1.69512	2.5311	1.22709
Prdx5	2.58903	2.43143	2.95834	2.14365	2.5178	2.32152	2.85451	2.28001	3.17352	3.40904	2.55093
Cacna2d1	1.5002	0.976424	2.95683	0.434958	1.90861	0.234157	3.5101	3.34734	0.220904	0.317167	0.239213
Rab14	3.21582	3.23922	2.95439	3.52364	3.27444	3.51936	3.07688	3.31844	3.18776	2.14358	2.45945
Tmod2	2.25921	2.33246	2.95268	1.87752	2.15586	1.98481	2.07459	2.16055	0.294045	0.742277	1.33646
Grina	2.00253	2.0558	2.9524	1.71755	1.58619	1.57555	1.74177	2.13432	1.3585	1.35289	3.04872
Polr2m	3.1327	2.97078	2.95159	3.11903	2.75648	3.27699	2.52662	3.32087	1.09267	2.99477	0.955981
Ube2v2	2.33128	2.5075	2.93358	2.28143	2.2611	2.49674	2.64729	2.89458	0.737932	1.10343	1.18568
Fis1	3.34708	3.56763	2.93314	3.75133	3.01262	3.49725	3.27514	3.66208	2.44694	2.95668	1.89508
Nop10	4.53818	3.56265	2.93215	3.28453	3.56362	3.87714	3.37759	2.38434	1.36674	2.45658	1.01402
Mpped2	3.19622	1.25959	2.92361	1.78673	1.84651	1.37213	2.91768	2.65258	0.258823	1.67688	0.466548
Slc17a6	0.456236	0.925996	2.92014	0.0691065	1.1505	0.0482106	1.01367	1.77104	0.125493	0.0788018	0.150344
Pomp	3.35956	3.40166	2.91632	3.3797	3.09764	3.64908	3.35785	3.18394	4.24941	2.66105	1.82026
Bex4	3.67632	2.93061	2.91481	2.98752	3.72185	3.73583	3.26774	2.32421	0.34412	0.737432	0.51167
Nedd4	3.36017	3.39176	2.91125	2.96045	3.68302	3.24406	2.39985	3.12852	0.860695	4.75082	2.81926
BC031181	3.27983	3.17162	2.90708	3.0048	3.04275	2.95471	2.82135	2.91805	1.59555	1.49835	2.27616
Sfpq	2.44477	2.69241	2.90626	2.77854	2.81461	2.84051	2.09804	3.36283	2.21997	2.35824	2.08024
Atp6v1f	3.9344	3.58199	2.90438	4.57679	4.08467	4.20098	3.50565	3.21527	3.40147	2.22914	1.95938
Mpc1	1.76599	1.78145	2.89466	1.19583	1.69645	2.14033	1.47327	1.33706	3.60799	1.11233	4.52239
Ptn	3.26749	1.73001	2.88613	1.5948	1.48198	2.75178	1.67124	1.58836	1.77083	21.422	50.6228
Vsnl1	1.00045	1.11576	2.88152	0.240165	0.587047	2.632	0.357836	1.1799	0.305173	0.0200896	0.371007
Romo1	4.16702	3.70877	2.85907	4.68309	4.14643	4.06773	3.47677	2.74309	1.63753	2.98283	1.94071
Tsn	2.55459	2.67812	2.85775	2.79223	2.66145	3.07513	2.63235	2.91117	1.30972	1.33738	1.46142
Sh3bgrl3	2.7721	2.70116	2.83886	1.94547	1.57932	1.5418	3.6708	2.14169	7.41645	4.17716	1.05455
Scoc	1.96451	1.99027	2.83791	1.56527	1.82532	2.01889	1.35606	2.18915	2.73705	0.732864	0.931567
Zbtb20	2.5907	1.89118	2.83573	2.86072	3.9469	2.47385	2.38518	2.4021	0.801173	1.62281	4.43818
Fdps	2.83458	3.03912	2.82923	1.94718	2.12896	2.07772	2.41663	2.53914	0.552552	0.941002	3.20104
Timm8b	3.41511	3.22538	2.82629	3.53048	3.26438	3.26055	3.01192	2.9004	1.06594	1.82834	1.61804
Cox7a2l	3.91617	4.28989	2.82151	4.91128	3.65576	4.40461	3.82768	3.89797	2.98969	5.03764	1.55027
Mapre1	2.77495	3.16299	2.80045	2.81048	2.55711	2.70444	3.76557	3.21384	2.07871	1.98979	1.50562
Crip2	2.44172	3.24788	2.80007	2.68439	2.54628	3.11885	4.60523	3.95711	0.309923	0.932335	1.0159
Uqcrfs1	3.00984	3.22269	2.7998	3.11921	2.95511	2.88316	2.62345	2.93097	1.69783	1.98394	3.63248
1110004F10Rik	3.79847	3.71842	2.79935	4.03002	3.96008	4.59946	3.41722	3.59394	1.39085	2.27749	1.72418
Maged2	2.75644	2.2854	2.79279	2.26942	3.40294	2.43226	2.21783	1.93493	0.887049	5.07508	1.44421
Arpc2	3.99524	3.72242	2.79179	3.53842	3.05986	3.49009	4.15805	3.44907	6.12164	3.19682	1.6496
Cfl2	3.55507	3.29691	2.78959	3.44969	2.7824	3.32296	3.79185	3.08047	0.621605	1.92954	1.31921
Sumo1	4.3454	4.2656	2.77976	5.31321	4.49056	4.70517	4.14863	4.25645	1.91272	3.56117	1.5869
Tmeff1	2.63911	3.24226	2.77937	2.01548	1.2886	2.33371	2.84571	4.16933	0.16018	1.04912	0.198723
Reep1	2.03427	2.19514	2.77672	1.42693	1.75482	2.05661	2.98127	2.78057	0.174276	0.564914	0.194013
Rheb	3.40479	2.88144	2.77669	2.74591	3.10537	2.81379	2.58362	2.57822	1.84379	2.1705	2.2999
Snrpe	3.67414	3.97003	2.77487	4.27289	3.88615	4.16156	4.25242	4.11711	2.6801	3.87946	1.68346
Mff	2.80674	2.90154	2.77387	2.76081	2.48387	2.98293	2.89697	3.15493	1.19805	1.44	2.25682
Kif1a	2.02314	1.51741	2.76972	1.56057	2.10135	1.59189	1.43584	1.23398	0.299591	0.24446	0.982786
Ube2b	3.5717	3.15598	2.76161	4.80924	3.34732	3.71338	2.78131	3.10818	1.60497	2.17274	1.56942
Ndufb11	3.23764	3.22691	2.75835	3.82468	3.81001	3.34181	2.92589	2.58432	2.01563	3.56809	3.41197
Rpl22	3.74534	3.77831	2.75772	3.80111	3.61389	3.66146	4.4172	3.44504	11.5431	9.06481	2.48287
Txn1	4.11873	3.48063	2.75717	3.7163	3.03474	3.24116	4.68754	2.80796	2.18195	4.99944	3.33469
Sv2a	1.72509	1.42303	2.74981	1.25882	1.75705	1.3622	1.51468	1.45924	0.287917	0.164162	0.268186
Blcap	2.23987	2.15119	2.74155	2.37088	2.29473	2.29715	3.32596	2.85954	0.431326	1.29721	1.10759
Vcp	2.88326	2.91573	2.73783	2.72056	3.16924	2.92499	2.55091	3.43925	2.3103	3.1975	2.48968
Tubb4b	2.29167	2.0757	2.73767	1.2597	2.48032	1.78449	1.40708	1.75069	2.20507	1.47009	1.35253
Atp9a	1.61169	1.34185	2.73211	0.945282	1.89619	1.69806	1.17634	1.45189	0.265011	0.741724	0.508821
Prkar1a	2.90429	2.83108	2.73009	3.71963	2.99215	3.02579	2.62515	3.16928	1.8965	2.01783	2.01045
Arpc1a	3.82233	4.179	2.72409	3.84267	3.81577	4.12705	3.74067	4.30406	2.04406	2.84524	1.43223
Gprasp1	2.34748	1.85088	2.72192	2.21444	3.12079	2.28143	1.60846	1.65926	0.572652	0.540014	0.702468
Hspa5	1.91224	1.75519	2.72092	1.89595	2.90355	1.87478	1.40271	1.68339	4.92321	3.53748	5.3209
Akr1a1	5.09086	4.37319	2.71832	4.76978	4.50606	4.49329	5.66823	3.55755	5.01747	5.62332	1.81312
Tmem130	2.41127	1.8687	2.71373	2.35807	2.86584	2.49871	1.75816	1.65922	0.280928	0.137287	0.267284
Scd2	2.37984	2.02467	2.70522	1.88191	1.60565	1.27013	1.89833	1.7151	1.19072	1.71397	13.1418
Saraf	2.72654	2.19464	2.7046	2.51577	3.20845	2.30843	1.43042	2.1116	2.2166	1.21926	2.77083
Pkia	1.60458	1.65008	2.70424	1.25955	1.49648	2.11334	1.69184	2.3531	0.191522	0.240036	0.392696
Atp2a2	1.52437	1.20458	2.69953	1.21043	1.81644	1.37942	1.06874	0.948837	0.993289	0.984389	5.16774
Ndufs6	2.85334	2.79825	2.69174	2.86187	2.61808	2.94281	3.0346	2.67264	1.38088	2.48286	2.41496
Arf4	3.13606	3.53303	2.68329	3.13269	2.80729	3.06168	3.94803	3.61678	2.04468	4.45175	2.52029
Srsf11	1.97703	2.08486	2.67762	2.56453	2.23078	2.36969	1.83895	2.70706	1.54238	2.05454	2.02789
Timm13	2.98396	2.96952	2.67456	3.30713	2.76068	3.0155	3.50086	2.79529	2.01844	3.11111	2.40043
Ndufa2	3.79389	3.47003	2.67386	4.77544	3.31826	3.45517	3.40033	3.11883	2.65202	4.51424	2.76605
Elavl4	4.80542	5.78294	2.66855	3.5266	2.60301	2.8257	3.18229	3.80571	0.444342	0.59902	0.367741
Pnmal2	2.30521	1.67198	2.66825	2.32132	2.75853	2.64432	1.79424	2.09986	0.377482	0.384109	0.546097
Tmx4	1.88307	1.51203	2.66725	2.13727	3.14299	2.15718	1.08978	1.57049	0.559143	0.370121	0.880194
H2afy2	2.19244	3.09822	2.6626	2.83691	2.52905	3.55947	3.07076	4.80599	0.437553	2.91629	0.359962
Mgst3	1.99275	2.13052	2.65795	1.03254	1.43704	1.25552	4.24132	1.94112	0.472655	0.493626	0.50101
Luc7l2	1.71638	1.70336	2.65701	2.19316	2.39159	2.09329	1.43511	1.82399	1.79831	1.60768	2.5287
Selenof	2.68827	1.62484	2.65302	0.892311	3.57438	2.10104	0.507893	0.676935	5.93829	0.433178	4.54386
Arxes1	2.00244	1.66925	2.65006	1.49913	2.52144	1.88188	2.13117	1.83489	0.222632	0.602562	1.75721
Ndufb10	2.97461	3.10982	2.64222	3.17868	3.3923	3.30685	2.88546	2.78774	1.71038	2.4674	3.28684
Rpl36al	4.43093	4.03225	2.6402	4.98368	3.50767	3.69389	4.12169	3.55973	2.61141	5.21533	1.26301
Canx	2.1528	1.74087	2.63887	1.68241	2.1949	1.87549	1.49129	1.5178	2.52393	1.69425	3.5915
Atp6ap2	1.42868	1.51645	2.63882	1.34536	1.72782	1.50336	1.16393	1.60676	2.51382	0.511756	2.50957
Srsf5	2.61964	2.45835	2.63837	3.20137	3.02002	3.20114	2.15744	2.60683	2.98218	3.14884	3.26991
Atrx	1.49405	1.71417	2.62748	1.59776	2.39894	2.3691	1.25875	1.82943	1.41442	1.02763	2.10222
Nisch	2.38565	2.34008	2.62336	3.00261	2.77809	2.80015	2.21364	2.52829	1.40351	2.88702	2.68106
Zfp706	3.31754	2.98205	2.61472	3.38886	3.03905	3.19513	2.95997	3.13262	3.88332	2.03777	2.09339
Rnf7	3.63287	3.72447	2.61444	3.26876	3.18678	3.11239	3.22343	3.56044	3.82109	4.24634	1.59816
Rab11b	2.92943	3.33309	2.61432	3.67424	2.67626	3.83726	3.27804	4.01532	1.40549	2.26323	1.67926
Cct5	3.25411	3.64335	2.61123	3.27621	3.16209	3.57456	3.61192	3.77786	1.73601	3.03541	1.40289
G3bp2	1.78819	2.34187	2.6093	1.71784	1.45446	1.72804	1.58113	2.86568	1.47611	0.972831	1.02546
Eif5	2.85419	3.00367	2.6093	3.28672	2.81028	3.13272	2.82693	3.12423	2.82515	2.17245	2.85913
Psd	1.79075	1.59533	2.60878	1.6524	2.58253	2.24935	1.3184	1.30139	0.265839	0.126692	0.257902
Wsb2	1.66547	1.43182	2.60843	0.885833	1.68666	1.69683	1.55205	1.23252	0.654618	0.507395	0.646468
Mien1	2.08144	2.17123	2.60557	1.58516	1.61769	1.65403	2.4697	2.04399	0.818696	1.31236	1.0738
Ndufv2	2.80803	2.79643	2.59603	2.72096	2.7318	2.89628	2.64718	2.44763	1.38076	2.14394	2.71754
Ppp1ca	4.05172	4.13498	2.59436	3.72024	3.02542	2.93577	3.97629	3.38091	4.03997	5.07129	1.91052
Slc12a5	1.22228	0.975825	2.59004	0.709217	1.58866	1.47714	0.415345	0.826779	0.208986	0.0715166	0.26368
Fam171a2	1.46776	1.65761	2.58968	1.37736	1.90922	1.96131	1.6924	2.24281	0.150942	0.496632	0.294421
Dcx	1.97718	3.20594	2.58872	2.26915	1.86942	2.33896	2.05941	4.08419	0.119614	0.654858	0.113501
Vgf	1.62227	0.693123	2.58721	0.506724	1.61227	0.541399	0.386398	0.590769	0.287212	0.0241351	0.263403
Auts2	0.854031	1.07629	2.58379	1.25522	1.19111	1.15495	0.96055	1.53853	0.213805	1.36447	1.22326
Gdi2	3.26027	3.54388	2.58249	3.07539	2.58107	2.89837	3.69041	3.48764	6.3966	3.20782	2.08474
Sdhb	3.11663	3.11276	2.58168	3.35315	2.63758	2.82653	3.20122	2.96369	1.611	2.3424	2.27084
Acot7	2.73677	2.79373	2.57651	1.59711	2.18842	1.87493	3.43176	2.32372	0.384242	0.451667	0.573344
Bcas2	3.05846	3.07528	2.57227	3.10917	3.31159	3.51223	2.97373	3.25113	1.56737	1.95741	1.47748
Ndufa8	2.78868	2.60919	2.57178	2.68178	3.19901	2.95725	2.64233	2.35447	1.62378	1.54633	2.75235
Ccdc88a	1.80464	1.79124	2.57011	1.50269	2.07723	1.99155	1.79473	1.75456	0.568295	0.805366	4.89967
Ncald	2.25777	1.21165	2.56781	1.18729	1.66274	2.10448	0.569003	1.10666	0.350862	0.119621	0.569694
Pafah1b1	2.94261	2.27754	2.56749	2.20557	2.60306	2.38615	2.1738	1.89511	1.42421	1.41725	2.12089
Hnrnpu	2.38371	2.22759	2.55859	2.50478	2.50516	2.39995	2.19335	2.62421	2.2979	2.23665	2.29538
Uqcc2	3.24334	2.69695	2.54267	2.56481	3.54935	2.4588	3.26548	2.65024	1.32629	2.58279	1.78482
Cct2	3.22248	3.3771	2.54236	3.03609	3.17449	3.70088	2.59553	3.19571	2.06904	2.04375	1.42331
Ndufa1	3.26445	3.12747	2.54201	3.19819	2.81024	2.92218	2.61958	2.3309	1.4125	2.03391	1.60839
Mapk8ip1	2.54764	2.32785	2.54131	2.20727	2.12626	2.28019	2.30443	2.10954	0.283644	0.618636	1.09658
Map2k2	2.41139	2.82975	2.53822	2.39602	1.97582	2.55343	2.32099	2.849	1.97062	2.45138	1.4552
Cxadr	0.967592	1.28982	2.53748	1.13131	1.15512	1.60106	1.30315	1.92406	0.129951	0.729734	0.116984
Ppib	1.57081	2.0121	2.53696	1.23191	1.09268	1.19079	1.92614	2.31164	4.29642	7.97189	5.33825
Dync1i2	2.2609	2.6081	2.53593	2.70527	2.43015	2.57777	2.96812	3.01939	1.1952	1.48808	1.24918
Fabp3	2.23192	1.71302	2.52763	1.92772	2.58275	2.32688	1.03934	1.0586	0.32772	0.167639	0.289336
Rnf14	2.14926	1.9992	2.51282	1.42497	1.81778	2.03847	2.10879	2.00071	0.515357	0.579053	0.927222
Csnk1a1	2.64083	2.4722	2.50223	3.02934	2.82233	2.75786	2.19956	2.59666	1.93918	2.55069	2.85201
Arglu1	1.60544	1.60468	2.49942	1.76616	2.21373	1.78043	1.49967	1.82415	1.05653	1.26481	3.38938
Hnrnpa3	3.00732	3.28243	2.49365	3.92471	2.92778	3.09064	4.01129	3.69451	2.30851	3.87896	1.57663
Hmgn2	2.78038	2.73748	2.49036	5.06994	3.8865	3.99738	2.77367	3.01741	3.03958	4.55097	1.90634
Klf7	2.16215	2.64286	2.4895	1.65885	1.52596	2.05703	3.53733	2.62292	1.03788	0.470002	2.51489
Snrnp70	1.67657	1.53758	2.48713	1.83639	2.17915	2.18714	1.39714	1.77803	1.8503	1.42866	3.74835
Cct7	3.34718	3.74994	2.48435	3.72579	3.31391	3.75889	3.19498	3.59018	1.73112	1.85733	1.54465
Gtf2h5	2.70643	2.47586	2.48148	2.64821	2.62466	2.7695	2.56196	2.52703	1.141	1.7697	1.26246
Luc7l3	1.76385	1.82788	2.47992	1.98913	2.5135	2.30275	1.75983	2.2983	1.07745	1.33856	2.76417
Tspan7	1.59638	2.18035	2.47616	1.37418	1.68607	2.83593	1.36645	1.59133	0.840907	1.26592	2.39675
Cdk5r1	2.17727	2.38819	2.47543	2.68452	1.46917	2.47458	3.41297	3.43558	0.459245	0.424699	0.257301
Snap25	2.7235	2.52936	2.46986	2.42183	2.49509	1.74772	1.88903	1.5208	0.466029	0.206015	0.532501
Sec62	2.15607	2.16374	2.46643	2.37599	2.65297	2.5631	2.09929	2.24002	1.53732	2.32121	2.18236
Hnrnph1	2.42199	2.7503	2.4642	2.85089	2.69194	2.84692	2.8531	3.01922	1.58897	1.88231	1.4659
Dctn2	3.01203	3.03066	2.46362	2.53502	2.77866	2.86063	3.41263	2.98386	2.02329	2.19141	2.22597
Son	2.05532	2.2725	2.46249	2.91169	2.47028	2.19177	1.95516	2.66344	3.05932	2.6167	8.47048
Trim2	1.49692	1.65399	2.45497	1.32793	1.63321	1.22593	1.41719	1.57024	0.277806	0.379124	0.805004
Atp13a2	1.09663	1.20862	2.44395	1.12558	1.27611	1.60539	1.21933	1.50165	1.22645	0.469641	0.71439
Aplp2	1.26677	1.1956	2.44346	0.957134	1.30695	1.54803	0.762531	1.19672	0.871984	1.42983	3.15799
Ctxn1	3.23944	3.39955	2.44299	4.17459	3.34041	3.57523	4.39443	3.24941	0.314734	1.07917	0.521565
Psma2	2.88159	3.08805	2.43943	3.04762	3.01168	3.34611	2.75741	2.8873	2.15993	2.59596	2.30379
Minos1	4.07265	3.67689	2.43884	4.49282	3.69594	3.55263	4.17865	2.67091	1.94014	4.70956	2.35343
Dst	1.25741	1.0535	2.43553	0.718039	1.31022	0.951208	0.72442	0.806735	0.987878	0.411315	1.79064
Plppr3	1.61978	2.25817	2.4353	1.79522	1.97128	2.04246	2.31324	3.01011	0.144536	0.7037	0.0993342
Arhgdia	3.51347	2.89896	2.42742	1.9786	1.84079	1.95889	3.36985	2.39305	4.01392	3.25815	1.70315
Psmb2	3.31181	3.34383	2.42266	3.71126	3.33289	3.69963	3.19368	2.97434	2.47528	3.06005	2.41605
Slc38a2	1.46166	1.34064	2.42145	1.39236	2.66532	1.80908	0.786119	1.47862	2.64212	0.736014	0.493392
Prkacb	2.49711	1.87645	2.4186	2.24761	3.11775	2.66025	1.98905	1.61803	0.778334	0.507046	0.812737
Tia1	1.60563	1.94374	2.41731	2.58015	2.05062	2.40127	1.7557	2.55153	0.728344	1.37599	2.16596
Pdcd5	3.2179	2.84927	2.41047	3.09891	2.81643	3.07393	3.07438	2.56743	1.38952	2.76454	1.68091
Psmb3	2.93066	3.04764	2.40874	3.41124	2.85351	2.89003	2.8753	2.87773	2.15639	2.73045	1.99127
Ptprd	0.991663	0.950761	2.40531	0.625323	1.98219	1.12365	0.439097	0.601084	0.162592	0.16788	0.93351
Ntng1	0.653695	0.927766	2.40134	0.379418	0.840331	0.859354	0.398653	1.56381	0.0770926	0.0958131	0.143546
Dctn3	3.01472	3.29946	2.39981	3.37497	3.24041	3.70619	3.25822	3.12399	1.12908	1.35293	1.64302
Mrpl20	2.85307	2.78056	2.39955	2.7284	2.61482	2.79516	2.73322	2.68152	1.18803	1.64867	1.6047
Sdc3	1.48124	1.41471	2.39495	0.904283	1.38102	1.76098	1.01778	1.26147	0.350584	0.361741	1.07998
Sms	3.39172	3.29925	2.39493	2.20888	2.95607	2.52905	3.38923	2.46445	0.646596	0.50098	0.511139
Cyc1	1.85072	2.13199	2.39299	1.67543	1.77295	1.85625	1.81963	1.99227	1.23622	1.61582	3.3321
Mpc2	2.2712	2.10646	2.39044	1.90797	2.37627	2.08076	1.728	1.53978	1.24188	2.19566	2.32273
Pgm2l1	1.14886	1.11269	2.39025	0.36509	0.553375	0.714383	0.857194	1.01625	0.236105	0.182069	0.27773
Snrpd1	3.40696	3.25844	2.38716	3.74384	3.51641	3.98531	3.67057	3.40311	1.59181	2.34968	1.93356
Rrp1	2.54005	2.44733	2.38434	2.77854	2.81822	2.73646	2.26783	2.45595	1.53012	1.67524	1.27817
Prnp	1.908	1.83459	2.38416	2.05082	2.80571	2.29387	1.3522	1.70583	0.434018	0.590275	9.86044
Plppr4	1.10203	0.785975	2.37762	0.647584	1.19951	1.17157	0.70467	0.599977	0.176415	0.0133479	0.161051
Apbb1	2.4268	2.47241	2.37337	2.43374	2.5565	2.36911	2.10526	2.59618	0.33016	0.741909	0.739497
Tomm7	3.28667	2.85044	2.35335	3.52327	3.17398	3.41356	2.98948	2.27187	2.41868	2.21425	2.00331
Ndufs7	2.09149	1.92819	2.35112	2.33685	2.23191	2.26668	1.77759	1.72407	1.50537	1.74338	2.65908
Snx3	1.95368	1.85345	2.33995	1.28688	1.7721	1.45886	1.8063	1.84167	3.4333	2.54911	2.66304
Spcs1	2.73957	2.33551	2.33595	2.35896	2.81723	2.41803	2.12344	2.0682	1.94883	3.24255	2.68561
Rbfox2	2.43381	2.78578	2.33257	2.34422	2.21419	2.76464	2.46461	3.23934	0.252759	1.23914	0.421102
Fkbp8	2.62633	2.63267	2.33231	2.45881	2.04186	2.27041	2.6047	2.70949	2.00149	2.86342	1.58487
Bzw1	1.737	2.15586	2.33072	1.68038	1.42998	1.84479	2.12035	2.54412	1.69969	1.91982	1.10871
Emc10	1.85354	1.94185	2.32663	2.07399	1.93041	1.78345	2.17632	2.2762	1.4023	1.96544	2.34618
Psmb7	2.76077	3.06794	2.32578	3.01777	2.34757	2.61701	3.46311	3.16736	1.22454	2.18989	1.1622
Coa3	2.64616	2.48624	2.32368	2.11714	2.24668	2.62388	2.42564	2.159	1.45979	1.64497	1.42832
Gde1	1.71672	1.64487	2.31859	1.59385	1.93561	1.72929	1.46871	1.77753	0.811872	1.16848	2.07425
Fkbp2	1.956	1.45214	2.31778	1.61195	1.99527	1.66287	1.35448	1.12772	1.47482	0.987784	1.37275
Pdap1	2.80059	2.80461	2.31726	2.7587	2.32249	2.79362	3.19564	3.00292	0.960108	2.0213	0.779525
Arxes2	2.39979	2.2198	2.31255	1.93404	2.58593	2.15431	2.52997	2.54457	0.248004	0.814863	3.5059
Gprasp2	2.22302	1.66939	2.31045	2.4774	3.10767	2.56334	1.05189	1.57585	0.479251	0.346535	0.624505
Mrpl52	3.21657	2.79973	2.31027	3.21876	3.16744	3.48248	3.01185	2.66664	1.95422	2.31572	1.26876
Rab10	2.50041	2.49138	2.30939	2.17718	1.76483	2.10697	2.84723	2.60501	1.08071	1.5743	1.79973
Trappc4	2.99787	2.99559	2.30767	2.66907	2.42968	2.55832	3.45022	2.6974	0.830036	1.12342	0.96129
Clstn1	1.48145	1.56066	2.30629	0.892074	1.62799	1.52964	1.17427	1.36072	0.519771	0.556915	1.37226
Stx7	2.20365	2.32722	2.30599	1.75642	1.81964	2.23158	3.34014	2.49038	1.86589	0.875577	0.932363
Nbea	1.00894	1.04669	2.29455	1.0839	1.52639	1.22241	0.65207	0.933236	0.251484	0.348578	0.54059
Atat1	1.34985	2.33266	2.29446	1.55802	1.01122	1.41072	2.56885	4.58378	0.292401	0.752544	0.619814
Lamp1	2.17986	2.31985	2.28918	1.9998	2.38345	2.18701	2.08132	2.04363	11.8708	3.94302	10.9354
Chst2	0.175598	1.12414	2.28773	0.309373	1.4565	0.245296	0.41155	0.162434	0.171019	0.538035	1.29992
Fgf13	0.996617	1.08872	2.28712	0.328534	0.912147	0.383274	1.00727	1.16584	0.231237	0.112215	0.203758
Camk2d	1.21349	0.843351	2.28541	0.778426	0.907595	0.759036	0.591661	0.70614	1.2718	0.425212	1.96925
Tpi1	3.44561	3.32452	2.28491	2.43933	2.36247	2.11406	2.85955	1.42044	2.07858	3.63597	3.84922
Syngr3	1.53143	1.19946	2.28415	0.751862	1.37705	1.2439	1.30107	1.27104	0.173992	0.0863439	0.176502
Rundc3a	2.09552	2.63781	2.28186	2.61763	1.82381	2.16902	2.24272	2.8674	0.224231	0.30207	0.812528
Ldhb	1.81285	2.91543	2.28122	2.11686	2.92432	2.89138	2.48268	2.92036	6.43881	2.79599	6.61357
Mkrn1	1.98106	2.33022	2.28091	2.1513	2.04279	2.37091	2.08009	3.06613	1.04162	0.77445	0.543521
Ndufa12	2.77673	2.60298	2.27457	2.81236	2.86855	2.55658	3.13956	2.07161	1.31165	1.82697	3.44603
Gaa	1.48385	0.938927	2.27371	1.0788	1.91335	1.10522	0.755638	0.850152	0.773707	0.903559	1.41526
Dnajc5	1.87902	1.80031	2.26854	1.76321	1.67147	1.79329	1.56447	2.06869	0.802204	0.850674	0.897051
Bax	2.47013	2.76425	2.26755	3.08194	2.344	2.38826	3.06583	2.94858	1.99202	2.03486	1.97665
Arpc5	3.54063	3.74421	2.26752	2.79851	2.86248	2.74747	4.59435	3.96596	2.7087	1.98782	0.872965
Eef1a2	1.93223	1.52214	2.26561	2.07271	3.01075	2.33165	1.25617	1.25199	0.376993	0.102997	0.412019
Cend1	1.36274	1.22172	2.26499	0.796055	0.877915	0.796891	1.04035	0.986993	0.171151	0.13053	0.267643
Ncl	2.80482	2.59731	2.26476	2.61153	2.93285	2.78121	2.8963	2.8838	2.75999	3.23884	1.38596
Atp6v0d1	2.42206	2.7801	2.26472	2.5371	2.28649	2.25767	2.4598	2.50244	1.47299	1.72597	1.28481
Rab3c	0.844118	1.27927	2.26442	0.884499	1.08151	1.02326	0.52666	2.72891	0.16508	0.140171	0.231926
Sbk1	2.16948	2.97158	2.26289	3.12517	1.64197	2.50534	3.61914	5.06298	0.123637	0.710894	0.314361
Zfand5	2.11519	2.60742	2.26109	2.69635	2.27531	2.70588	2.2848	2.98488	2.04747	1.25577	1.64474
Opcml	0.534836	0.681863	2.2604	0.324798	0.647624	0.927842	0.459015	0.97219	0.110661	0.041629	0.137853
Prdx1	3.61684	2.80856	2.25769	2.9166	3.33206	3.03774	3.44001	2.19858	5.56337	6.69986	6.88041
Tmem256	2.03077	1.97543	2.25517	1.60625	1.50824	1.43125	2.7247	1.96982	1.8654	2.7257	2.26893
Pabpc1	2.79338	2.77549	2.25479	3.13935	2.34295	2.84701	2.94862	2.72222	6.21203	5.04294	1.43966
Hdac2	2.78162	3.60945	2.25462	3.55878	2.42049	3.26962	3.7894	5.00024	0.706511	1.99984	0.596035
Brk1	2.84367	2.7434	2.24792	2.8	2.35834	2.64935	2.85733	2.42824	3.54445	2.77486	1.65855
Chchd10	3.63227	0.961459	2.24609	1.18342	1.8083	0.777249	11.4408	1.02043	0.462021	0.799808	3.30468
Pnisr	1.3101	1.51132	2.24437	2.01479	1.92674	1.80633	1.45913	2.28688	0.825946	1.04802	5.59998
St13	2.36457	2.11322	2.24069	2.52489	2.23957	2.60739	2.05186	1.92212	2.21668	2.0686	1.52291
Dnm1	1.29128	0.961271	2.24023	0.928673	1.3461	1.21384	0.657668	0.934438	0.4167	0.47017	0.459874
AC149090.1	0.43664	0.353197	2.23944	0.167622	0.844347	0.623958	0.156135	0.249369	1.11291	0.0261485	1.24239
Pcbp1	3.3273	3.63234	2.23889	3.30446	2.83025	2.79468	3.10612	3.49783	3.10379	4.72893	2.36762
Cnbp	3.53184	2.95515	2.23789	3.63263	3.35445	3.30847	2.43978	2.51545	3.13382	4.24241	2.64475
Impact	1.85463	1.01373	2.23752	1.05828	1.40074	0.890389	0.617572	0.967061	0.893488	0.544502	1.17925
Pcbp4	3.03649	3.48334	2.23688	2.84491	2.52227	2.38124	4.10737	3.56486	0.371527	1.77551	0.681505
Nktr	1.13046	1.17203	2.23474	1.36075	1.512	1.2537	0.878585	1.2785	0.955923	1.13681	1.84101
Ssr4	2.4283	1.77769	2.23071	1.98147	2.34164	1.75539	1.36061	1.28237	3.88246	2.54166	1.81408
Higd1a	2.54759	2.46607	2.22969	1.93398	2.34455	2.00222	2.10005	2.09079	1.01296	1.19582	2.05716
Dusp26	2.0978	2.04609	2.22691	2.09315	2.48182	2.13719	2.58361	1.69202	0.204824	0.186298	0.209486
Adgrl1	1.41672	1.36382	2.21903	1.38339	1.46693	1.50241	1.40395	1.61391	0.282183	0.599858	1.45071
Hmgcr	2.20681	1.73231	2.21502	1.37178	2.30883	1.7288	1.49788	1.19594	0.353678	0.424668	3.34124
Pja2	1.88647	1.61967	2.21482	1.55465	2.17457	1.86584	1.49686	1.65451	0.683752	0.646727	1.05677
Cadps	1.15425	0.890348	2.20772	0.660793	1.49955	1.11852	0.555425	0.598825	0.168355	0.0963767	0.209341
Tomm22	2.31734	2.38271	2.20665	2.37087	1.89266	2.199	2.40899	2.60624	1.97585	2.59205	1.81418
Bcl11a	0.894532	0.580996	2.20605	0.647985	0.46426	0.354112	2.46007	4.05694	0.0948698	0.433715	0.0545555
Macf1	1.31932	1.34538	2.20521	1.53032	1.89954	1.98579	1.18761	1.57117	1.73344	1.07969	6.38506
Scand1	2.52503	2.5232	2.20474	2.9625	2.8816	2.90609	2.0951	2.64985	2.15935	2.22286	1.86907
Efnb3	2.08165	1.65256	2.18944	2.60785	2.07614	2.39785	1.50497	2.11672	0.239751	0.837256	0.345023
Cct8	2.59242	2.80525	2.18925	2.39324	2.58231	2.74251	2.59561	2.74911	1.90827	2.12471	1.35319
Tcp1	2.92876	3.24583	2.1854	2.78396	2.4545	2.88716	2.9618	3.16863	1.2797	2.6961	1.15469
Ptp4a1	2.1749	2.5477	2.18221	2.91355	1.92574	2.44458	2.60164	3.03655	0.852574	1.50241	0.909899
Fam103a1	1.71184	1.7713	2.18092	1.73866	1.49697	1.78769	1.83359	2.36053	0.810739	1.19062	0.573725
Eif3k	2.97183	3.43353	2.17734	3.23459	2.7459	3.32206	3.27636	3.21987	2.60772	5.24964	1.54502
Alg2	1.68879	1.79683	2.17702	1.77781	2.0806	1.84797	1.73565	1.87651	0.274267	0.470103	0.741763
Ppp2r1a	2.26894	2.52499	2.16615	2.27208	1.89499	2.1692	2.84682	2.74256	0.758358	1.70312	1.1652
Cct4	2.84981	3.20719	2.16118	2.04373	2.02621	2.39037	2.91523	2.8931	2.28953	2.97614	1.34331
Spcs2	2.71217	2.52671	2.1585	2.98329	3.71433	2.99231	2.02987	2.14854	3.10617	2.10937	3.42536
Sept7	2.08503	2.16986	2.15825	1.84408	2.11625	2.0701	1.88352	2.12308	1.90193	2.38699	3.26295
Myef2	1.82615	1.87334	2.15714	2.00363	2.21343	2.00473	1.64649	1.79795	0.468456	0.804022	0.556045
Pgls	2.44048	2.44767	2.1569	2.33732	1.99917	2.32846	2.39494	2.17137	2.7152	2.58772	1.84678
Pcbp2	3.50734	3.82689	2.15594	4.32083	2.91657	3.43415	3.33649	3.76676	2.72185	5.48712	2.32915
Tcaf1	1.82895	1.88594	2.15275	1.65218	2.18932	1.84148	1.34751	1.92978	0.330629	0.858395	0.792353
Atp6v1a	1.46232	1.27304	2.15152	1.00435	1.17039	1.27712	0.871521	1.32538	0.806425	0.6479	0.971512
Ndfip2	1.81194	1.91661	2.15121	1.58637	1.9796	1.6677	1.51587	1.70169	1.09821	0.739767	1.29536
Ppp2r2b	2.0319	1.75333	2.14619	1.71329	1.98639	2.3247	1.19079	1.556	0.290904	0.247317	2.41528
Ssbp4	2.10875	1.88895	2.14462	2.58412	2.57253	2.76104	1.86015	1.18864	1.93189	1.096	1.05527
Cbln2	0.287725	2.2369	2.1424	0.276595	0.167855	0.0890077	0.0389661	2.29483	0.0425174	0.242395	0.0449683
Wdr6	2.34312	2.09199	2.13865	2.58661	3.56343	2.90733	2.13894	2.58722	0.417834	0.714226	0.810282
Pfdn1	2.63011	2.54852	2.13735	2.71177	2.42874	2.37893	2.64436	2.36312	0.872455	1.92277	1.39447
2900011O08Rik	1.82824	1.58574	2.13451	1.17946	1.13848	1.53918	1.44464	1.87085	0.187403	0.126826	0.203413
Dda1	2.4358	2.23138	2.13279	1.96923	1.8512	1.96831	2.38532	1.91422	0.687138	1.06751	0.918243
Ppdpf	3.01603	2.78547	2.13198	4.07488	2.45629	3.25432	4.07932	3.64429	0.662881	2.35531	1.0684
Tmem59	2.21841	2.34985	2.12932	2.74066	2.82694	2.72609	1.68105	1.98406	3.92595	3.16609	6.21886
Usp22	2.34509	2.21063	2.12726	2.16351	2.94035	2.62484	2.39995	2.25145	0.646618	0.806228	0.777149
Ddah2	1.91343	4.61142	2.12357	2.60093	1.44257	1.97753	3.50872	4.75983	1.46599	3.73286	0.871846
Vat1	2.98383	2.57328	2.11927	1.72464	1.9452	1.77558	1.70577	1.69192	0.558475	0.985671	0.618504
Gabarapl1	2.72475	2.13792	2.11902	2.17183	1.95677	2.2515	2.156	1.95138	0.517914	0.773535	0.924081
Syt1	1.06973	2.28772	2.1181	2.44293	2.54021	2.6001	0.947846	0.976069	0.170751	0.163813	0.143649
Rbm5	1.10199	1.14823	2.11621	1.31989	1.45165	1.32027	0.999088	1.48789	1.01817	1.05231	1.58904
Gnaq	1.72018	1.59842	2.10829	1.8895	1.77165	1.91482	1.32999	1.6793	0.801292	0.483458	0.875332
Nrxn3	1.31345	0.990943	2.10685	1.62635	0.680211	3.36632	0.266089	0.532695	0.202147	0.0751576	1.24312
Hpcal1	1.25856	1.07042	2.10642	0.505611	0.412198	1.02077	0.618086	1.41342	0.410925	0.577397	0.257808
Snrpg	3.38095	3.32404	2.10326	6.14851	3.88065	5.1467	4.60285	3.81108	2.09735	4.17378	1.0527
Ndufb7	2.95904	2.98175	2.10197	3.28785	2.65084	2.60444	3.43069	2.53611	1.60495	2.56487	2.11929
Srsf7	2.08094	2.10613	2.10038	2.68873	1.88738	2.09349	2.37604	2.72906	1.9265	2.21723	1.49638
Gnb2l1	4.06276	4.73074	2.09964	5.48145	1.9909	4.05476	5.75878	4.79245	0.992849	9.20506	0.620844
Serpine2	0.259487	0.422354	2.09855	0.454477	0.830759	0.271044	4.47616	0.378111	4.14591	0.920151	16.0829
Slc38a1	1.21367	1.2271	2.09761	1.32089	1.47295	1.52415	0.862109	1.34672	1.06465	0.370858	0.206046
Slc24a5	1.67102	1.66047	2.09732	1.83381	2.27735	2.22152	1.27795	1.7575	0.392172	0.573982	0.575351
Psmb4	2.62968	2.74905	2.09684	3.26198	2.85777	2.97029	3.11746	2.52068	1.71352	2.65703	1.74024
Scn2a	0.81094	0.607327	2.09002	0.275595	1.31129	0.904621	0.29668	0.388547	0.154397	0.00713116	0.162856
Acp1	1.89982	1.82396	2.08809	1.90477	2.116	1.99749	1.66386	1.64677	0.86158	1.42352	1.25779
Sf3b6	3.25574	3.04992	2.08667	3.74649	2.93544	2.92273	3.50782	2.86719	1.53487	2.31714	2.20333
Psma1	1.99972	2.3081	2.08571	2.28477	2.30591	2.33381	2.24229	2.45065	2.23739	1.65373	1.61437
Ndufs4	2.42211	2.55417	2.08338	2.41414	2.86613	2.80194	2.04753	2.46172	1.14696	1.63852	1.77821
Bzw2	1.55926	2.67333	2.08179	1.62167	1.70186	2.10482	2.50669	3.10771	0.429355	1.20451	0.415068
Oxct1	1.6751	1.5201	2.07863	1.03581	1.76048	1.37648	1.89753	1.54343	1.69808	1.20035	1.80179
Ccl27a	1.769	1.86364	2.07646	2.07909	2.20235	2.28596	2.4558	2.01558	0.18212	0.26444	0.286404
Tmed2	2.50387	2.3766	2.07388	2.6065	3.0092	2.70011	2.47894	2.43702	2.98765	3.27885	2.21811
Ergic3	1.8268	1.99007	2.07091	2.12156	2.00483	1.97687	1.99606	2.12205	1.70855	3.46963	2.23714
Trappc6b	2.8199	2.37323	2.06974	2.35167	2.65538	2.55355	2.18535	2.02841	1.11424	1.0116	0.839955
Top1	1.93541	2.32452	2.06505	2.77759	2.58846	2.64814	2.17324	2.99624	1.71923	2.25021	1.84325
Cnrip1	1.95083	1.80437	2.06055	1.61388	1.61199	1.87852	1.59649	1.40457	0.339707	0.793278	0.608781
Pclo	1.15168	0.818557	2.05996	0.708332	1.00363	1.03748	0.442278	0.611952	0.17998	0.0814922	0.608728
Eno1	2.40258	2.37865	2.05929	1.44404	1.56348	1.38082	2.86744	3.09828	1.64252	2.31021	5.84364
Ssb	2.31574	2.57128	2.05756	2.77801	2.92148	2.94854	2.43459	2.8917	1.77097	2.03991	1.39757
Guk1	2.36713	2.05011	2.05612	1.56403	1.95299	1.8178	2.47842	1.97497	0.549117	0.811752	0.848346
Slc25a5	6.31987	3.59651	2.05419	5.83979	2.62746	2.67259	3.6914	2.3111	7.29525	4.27027	9.19931
Clstn3	0.955037	0.712735	2.04931	0.799777	1.33593	0.838431	0.590335	0.633318	0.239873	0.0667491	0.230383
Rab7	2.30482	2.33827	2.04355	2.23708	2.08184	2.36693	2.22478	2.40308	2.25805	1.5134	1.65655
Bri3	3.75127	3.66904	2.04341	4.19251	3.35031	3.91257	4.28925	3.46022	3.40006	2.40361	1.85882
Atp6v1e1	1.92992	2.24907	2.03931	1.5078	1.48895	1.66493	2.01327	2.30962	1.32374	1.08868	1.36404
Sec61b	3.57528	3.24311	2.03777	3.8762	4.09265	3.34857	3.63501	2.43854	3.39291	5.69155	1.56974
Magi1	0.846434	0.790636	2.03748	0.535595	1.04073	0.936474	0.540085	0.672453	0.228998	0.136652	0.67141
Enah	1.42751	1.62273	2.03729	1.63644	1.6737	1.63891	1.39281	1.60194	0.295973	0.749039	1.95698
Zc3h15	1.89162	2.04915	2.03548	1.78577	1.82297	1.87185	1.79893	2.24425	0.751355	1.29228	0.709646
Cetn3	2.34379	2.44985	2.03415	2.6789	2.89859	2.87541	2.46423	2.12452	1.6267	1.83491	1.45597
Sybu	0.803727	0.646289	2.03386	0.607334	1.05188	0.972206	0.340234	0.529283	0.192318	0.0473895	1.05085
Pten	2.60937	1.70594	2.03355	1.73451	2.38884	2.07492	0.883885	1.23114	1.21007	0.899677	0.927541
Ankrd12	1.10979	1.29882	2.0325	0.929729	1.27071	1.29612	1.30618	1.60431	0.489938	0.690269	0.874557
Dpp6	1.06645	0.974771	2.03056	0.890694	1.41077	1.56673	0.62049	0.855412	0.196596	0.0891686	1.38026
Pcmt1	2.06086	1.89396	2.02804	1.62472	1.9904	1.6554	1.79898	1.54036	0.929717	0.988599	1.07301
Tsg101	2.47079	2.92657	2.02789	2.77619	2.35325	2.7853	2.76258	3.319	1.2017	1.23113	0.965821
Eif2s2	2.32693	2.3316	2.02499	2.2294	2.28052	2.22333	2.39956	2.19572	1.51855	2.56409	1.25648
Ppp1r14b	2.57138	2.24554	2.02281	1.85565	1.6811	1.89291	3.71889	2.49151	3.67581	2.53793	2.00305
Ptges3	2.44442	2.01916	2.02239	2.07912	2.44618	2.35962	1.9369	1.73021	1.42317	1.39826	1.12524
Uqcrc1	1.81507	2.2236	2.02204	1.95519	1.78148	1.73951	1.96743	2.25292	1.63953	2.83076	2.54968
Usp29	1.66682	1.12429	2.01748	1.7592	1.38384	1.62317	0.891771	0.988168	0.184663	0.164882	0.190435
Hmgn3	1.92265	1.38115	2.01452	2.62942	1.98796	1.70475	0.77912	0.743237	0.514814	3.44434	2.42669
AW551984	1.56132	1.24696	2.01128	1.45614	2.25902	1.77044	1.29531	2.21509	0.231274	0.363871	0.226145
Csnk1e	2.67464	2.90601	2.00883	2.56726	2.50562	2.72722	2.77717	3.00415	2.55256	1.04796	0.853006
Scamp1	1.03551	1.21491	2.00738	1.14055	1.07364	1.14316	1.14814	1.57369	0.38113	0.327256	0.438514
Ewsr1	1.62897	1.93813	2.00617	2.07195	1.72338	1.71798	1.90661	2.35513	1.66446	1.69534	1.39774
Ntrk2	1.01631	0.801237	2.00608	0.612744	0.913165	0.912136	0.447102	0.640564	0.433527	0.206677	11.7395
Rab18	1.86869	1.93309	2.00516	1.81876	1.50856	1.73189	2.23765	2.26626	1.12263	1.35773	1.45485
Trim35	2.02998	1.88674	2.00226	2.0461	1.89378	1.76453	2.14948	2.55323	0.618113	1.11923	0.70481
Necab2	0.611007	2.90309	2.00216	0.609401	1.3801	0.527811	0.403635	0.688142	0.105471	0.14001	0.102697
Tmeff2	2.5175	1.92525	2.00213	0.625537	1.36848	0.807412	0.554281	1.48124	0.154382	0.203132	0.137539
Ndufa6	3.22718	2.90167	2.00003	4.19453	3.18984	3.33478	2.95175	2.68374	1.83301	2.28056	1.64993
Ndufb4	2.33882	2.40409	1.99815	2.32328	2.58829	2.45072	2.1886	1.75575	1.31383	2.15818	2.31857
Selk	3.04895	4.03173	1.9971	5.03407	1.71863	2.45568	5.01076	4.42379	0.332724	3.51318	0.384957
Rnf11	2.14796	1.81198	1.9968	2.42342	2.0538	2.10605	1.53354	1.69295	0.547776	0.733099	0.824464
Atp5o	2.19189	3.56095	1.99642	2.80418	1.01694	1.66376	4.2992	3.73398	0.510292	6.27381	0.282126
Ndufb6	2.16958	2.1267	1.994	2.03366	2.2057	2.18263	2.61599	1.81039	0.856872	1.71911	1.77563
Enc1	0.901674	0.924516	1.99345	0.340549	0.363034	0.436016	1.43638	1.01173	0.24144	0.231275	0.12675
Celf5	1.59348	1.58663	1.99204	2.12225	2.16434	1.74422	1.80142	1.97242	0.187244	0.203345	0.162596
Zdbf2	1.98715	2.03828	1.98994	3.12752	3.65602	3.55382	1.55935	1.5706	0.336858	0.259586	0.434329
Pafah1b2	2.25504	2.44174	1.98804	2.80948	1.96572	2.07991	2.53683	2.74072	0.655374	1.47638	0.982499
Sf3b1	1.37466	1.59333	1.98785	1.73264	2.16687	1.97217	1.35381	1.75976	2.70046	1.46808	1.85553
B630019K06Rik	2.04059	1.56134	1.98498	2.49239	3.90799	2.36517	1.63003	2.31119	0.211723	0.245362	0.28314
Rnf10	2.09959	2.28869	1.98009	2.40794	1.87651	2.48958	2.25666	2.60485	1.02286	1.82947	0.963429
Ldha	2.66475	2.28738	1.97707	1.09514	2.74014	1.63606	2.58843	0.96036	2.50439	3.4607	2.52171
Sptan1	1.28469	1.16236	1.97512	1.0764	1.54989	1.38384	1.09755	1.22924	0.428015	1.03106	0.782965
Rbm25	1.71564	1.74836	1.97481	2.08217	1.90013	1.8856	1.80283	2.06978	1.69327	1.47121	1.84571
Rhob	1.4771	1.63463	1.97261	1.4439	1.65047	2.02147	1.17559	1.26013	9.10205	1.21751	4.3077
Psmd7	1.94067	1.98348	1.97243	1.99051	2.05338	2.03986	1.73598	2.13812	1.08548	1.57907	1.75255
Lingo1	0.824945	0.960148	1.97036	0.358672	0.628953	1.08496	0.817358	0.971652	0.097566	0.122483	0.308692
Prkar1b	2.00023	1.54101	1.96806	1.31868	1.9539	1.83378	1.73665	1.73303	0.365706	0.214099	0.356888
Fkbp4	3.23829	3.16568	1.96794	3.91716	2.81544	3.26172	3.3154	3.43321	1.1936	2.43561	1.32982
Hnrnpab	2.89009	3.47504	1.96618	3.06913	2.53148	2.85362	3.50323	3.85354	1.67773	2.36894	0.736697
Kif3a	1.43347	1.42844	1.96565	1.07669	1.61417	1.6996	1.31032	1.52676	0.334302	0.496614	0.893427
Psma5	2.48066	2.37795	1.96439	2.67127	2.48689	2.72011	2.30113	2.16856	1.76428	2.76656	1.54106
Atp6v1b2	1.87833	1.76533	1.9615	1.78085	2.13174	1.96676	1.31649	1.72042	1.4197	0.610318	1.03771
Atp2c1	0.777916	0.787159	1.95955	0.550175	1.01841	0.658479	0.881925	0.909351	0.91899	0.301214	1.28264
Hcfc1r1	2.4591	2.19746	1.95914	1.91939	2.32262	2.21603	2.3875	2.23044	0.955736	1.59474	1.10509
Zcrb1	2.34718	2.23341	1.95121	2.60746	2.34041	2.35494	1.99028	2.19968	1.14423	1.52425	1.04134
Drap1	2.24924	2.0622	1.95082	2.04475	2.27967	1.95954	2.05235	1.61043	1.46751	1.70606	1.56207
Ndufb3	2.47244	2.16278	1.95062	2.39381	2.53803	2.55621	1.98064	2.05432	1.43628	1.66546	2.11829
Metap2	2.41648	2.27646	1.94947	2.41839	2.34846	2.59483	2.08978	2.26357	1.38482	1.65104	1.37469
Pabpn1	1.02171	1.1262	1.94869	1.29176	1.62641	1.29176	1.03742	1.47262	0.282104	0.481446	2.1934
Pja1	2.42305	2.26674	1.94637	2.9679	3.26153	2.82474	2.22414	2.34053	0.553761	1.41236	0.81512
Hnrnpa0	2.21369	2.11184	1.94499	2.24277	3.1794	2.73956	1.61373	2.20585	2.45364	1.75884	1.83527
Bmyc	1.84786	1.44213	1.94456	1.47414	1.57649	1.548	1.23696	1.24812	1.59317	1.29724	0.863218
Ociad1	1.85206	1.93166	1.94319	2.01497	1.69384	1.90722	1.89337	2.05505	1.01734	1.84277	1.17752
Ddx39b	2.08597	2.16264	1.9389	2.76352	2.44087	2.64431	2.1028	2.34343	2.36749	2.44001	2.05002
Prkaca	2.38728	2.33281	1.93479	1.99134	1.96859	1.79654	1.88518	2.15909	0.631886	1.27753	0.676164
Cask	1.56897	1.31728	1.93211	0.810935	1.76316	1.58735	1.37611	1.54058	0.383345	0.619374	0.641989
Kmt2e	1.70069	1.97266	1.93164	2.37827	2.10604	2.21084	1.77654	2.331	1.14266	1.15984	1.27948
Phb2	2.45681	2.57553	1.93159	2.53518	2.23588	2.43997	2.47948	2.33233	1.90966	2.87376	1.58086
Ier3ip1	2.01624	2.23006	1.93098	2.37657	2.06466	1.71258	2.29626	2.03138	0.873904	1.40351	0.922826
Cotl1	2.11483	3.46928	1.92738	1.78386	1.44684	1.73227	3.77571	2.59595	4.31172	2.4717	0.809015
Atp6v1d	1.79022	1.83111	1.92504	1.6357	1.78722	1.84471	1.81186	1.95852	1.00989	0.871096	0.949154
Atp1a1	1.79243	1.28064	1.92263	1.23482	2.15607	1.37107	0.427604	0.78291	1.2241	0.25878	0.591778
Pfkp	0.789866	0.656948	1.92035	0.342358	1.20776	0.849003	0.569065	0.296628	0.210333	0.165672	0.726768
Gtf2a2	2.10494	2.01241	1.92007	2.06628	2.14389	2.1947	2.15076	2.05153	1.23404	1.43748	1.33942
Ctnnbip1	1.73277	1.92361	1.91689	1.07812	1.35951	1.55764	2.48526	1.8811	0.860387	1.00841	0.933168
Srp9	2.05858	1.9575	1.91209	2.12242	2.16524	1.9728	1.73257	1.78496	2.19372	2.28742	1.6171
Actl6b	1.40663	1.96019	1.91191	1.69424	1.49053	1.81043	2.32134	2.65146	0.0935048	0.221446	0.0746988
Tmem234	2.15701	2.21347	1.89984	1.6265	1.65694	1.71696	1.7968	2.02976	1.87554	2.28866	1.39828
Zfhx3	1.44535	2.53485	1.89971	2.3067	3.2524	3.46245	0.734337	5.41896	2.79097	0.907578	0.453688
Timp2	1.49654	0.973973	1.89916	0.780869	1.3824	1.18278	0.753186	0.908702	2.63175	1.01373	0.520749
Fam69b	1.58171	1.55638	1.89882	1.40494	1.54085	1.57261	1.9141	1.97842	0.141737	0.583536	0.501338
Atp5o.1	1.30053	0.84459	1.89765	0.412709	1.67573	1.50434	0.349344	0.486893	1.29605	0.233225	3.55246
Rala	2.61536	2.48767	1.89523	2.06944	1.71099	1.94841	2.83424	2.24516	0.877933	1.40002	0.639208
Itfg1	1.17032	1.14867	1.89458	0.987108	1.18212	1.15742	1.27724	1.50307	0.579235	0.703846	1.75751
Caprin1	2.17704	2.44608	1.89213	2.58782	1.9576	2.14131	2.72404	2.74144	1.14447	1.71972	1.07085
Tmem132a	0.849992	1.28011	1.89097	0.816005	1.00146	1.27038	0.960307	1.55311	0.149808	0.565137	0.484372
Tulp4	1.5325	1.57849	1.88928	1.79583	1.80376	1.75698	1.44787	1.71878	0.61775	0.543101	0.954183
Negr1	1.46465	1.52277	1.88849	2.11957	2.71776	1.4637	1.39825	1.60749	0.193522	0.21516	0.500199
Nono	2.49193	3.11786	1.88843	3.50915	2.32239	2.99068	3.11174	3.91052	1.6983	3.16065	1.01687
Cltc	1.49122	1.3037	1.88626	1.3383	1.67852	1.43543	1.00601	1.1368	2.79303	1.1268	1.63538
Chga	0.906166	1.06939	1.88471	0.774176	1.15941	0.879504	1.04185	1.06743	0.115213	0.0968626	0.144461
Ubqln2	1.87899	1.95055	1.88461	2.48467	2.21571	2.02002	1.37284	3.18605	0.430943	0.776144	1.38566
Cmip	2.15376	1.91968	1.88394	2.53691	2.7078	2.56969	1.77917	2.06738	0.446592	0.641169	0.450446
Grin2b	0.908913	0.711997	1.88359	0.666338	0.795265	1.33289	0.510321	0.602727	0.118758	0.0558432	0.549522
Arl6ip5	1.97807	2.05631	1.88344	1.67131	2.10898	1.54786	2.33245	2.23582	1.98772	1.76738	1.20525
Dync1h1	1.22912	1.21033	1.87953	1.07421	1.58921	1.2842	1.22404	1.19936	0.720252	0.779757	0.972021
Oaz2	2.12182	2.33546	1.87915	2.68775	1.57397	2.0769	2.44454	2.53118	0.576114	1.97794	0.648512
Psmd8	2.05049	2.56948	1.87661	2.27103	2.01562	2.32796	2.42191	2.82167	1.71689	2.14737	1.65357
Cfdp1	2.39783	2.23666	1.87439	2.07617	2.51671	2.63756	2.3253	2.08166	1.14027	2.24957	0.663452
Prelid1	2.67999	2.57613	1.87172	1.89328	1.6476	1.68957	2.69006	2.18332	1.86804	3.72203	1.12876
Capza2	1.9556	2.09567	1.87077	1.89423	2.0626	2.00122	2.16183	1.93826	9.07278	1.58091	2.6797
Ctsb	1.14253	1.21779	1.86928	0.929846	1.29419	1.00642	1.07521	1.10585	22.4941	2.88744	5.74553
Smim14	2.40215	2.22798	1.86882	2.06272	1.98187	1.94953	2.53151	2.24915	1.03374	1.30574	0.887332
Lrrc4b	1.29998	1.06282	1.86838	1.03036	1.70703	1.46016	0.672864	0.806107	0.197634	0.093928	2.31985
Hspd1	2.33094	2.03179	1.86735	1.86482	2.13389	1.97159	1.88072	1.84371	1.36	1.77881	1.43631
Srrm1	1.37031	1.29831	1.86706	1.5404	1.86201	1.6088	1.1803	1.35264	1.37012	1.04358	1.68526
Tmed9	1.20066	1.29365	1.86398	0.844027	0.909277	0.740361	1.47997	1.73009	2.64191	2.42241	2.31655
Itm2c	2.28758	2.07857	1.86285	1.98616	3.74109	2.87882	1.23246	1.35794	3.7536	4.81723	7.20292
Ppm1a	1.78713	1.27458	1.86038	1.07674	1.73907	1.54923	0.851982	1.04588	0.821783	0.498513	0.900504
Sgta	1.53575	1.72473	1.85981	1.70498	1.77258	2.04909	1.75391	2.03267	0.917103	1.17946	1.23334
B230209E15Rik	1.11866	0.629138	1.85779	0.274667	1.48079	0.760772	0.268876	0.419909	0.133071	0.00360299	0.143426
H2afy	3.33711	3.1008	1.85443	2.91289	3.77884	3.11174	2.72944	3.2611	2.4669	2.32144	1.78457
Mrpl33	2.21592	1.78065	1.85247	1.98512	2.31428	2.25462	2.08805	1.25812	1.10666	1.65467	1.3521
Prkcb	0.460731	0.565614	1.85105	0.292556	0.458696	0.487251	0.340053	0.558041	0.392664	0.112946	0.201667
Tkt	2.03819	1.82201	1.85006	1.40141	1.70625	1.64078	1.77936	1.30711	1.91249	2.0143	2.90898
Rbm4b	1.51151	1.87865	1.84906	2.65359	1.86651	2.30232	1.77479	2.80642	0.499282	1.41111	1.11714
Svbp	1.55055	1.98089	1.84896	1.61113	0.799945	1.15903	2.39202	3.61593	1.19401	2.11052	0.860142
Acat1	1.65795	1.65529	1.84856	1.40692	1.91593	1.96344	2.02179	1.43578	0.879597	1.24538	1.45949
Atp6v0a1	1.16166	0.966068	1.84817	0.78981	1.49253	1.14978	0.533061	0.84796	0.77488	0.29306	0.821229
D8Ertd738e	2.55753	2.35715	1.84729	2.74196	2.09351	2.41131	2.20787	2.10537	2.19105	3.13208	2.10495
Snrpf	2.57604	2.44081	1.84653	3.88465	2.92903	3.12451	2.63765	2.37324	1.75888	2.64327	1.07724
Cuedc2	1.95258	1.96348	1.84522	1.89735	1.85981	1.80551	2.28124	1.78376	1.49755	1.58032	1.38698
Uchl3	1.92661	2.11837	1.8452	1.46467	1.8622	2.39202	1.98734	2.16808	0.67133	0.678395	0.641548
Vps29	1.90186	1.87355	1.84453	1.6521	1.71482	1.6759	1.86447	1.69173	1.50147	1.33417	1.25231
Kifap3	1.3145	1.46608	1.84169	0.90264	1.07753	1.31143	1.61554	2.03268	0.311155	0.845455	0.545581
Sept3	1.71165	1.76703	1.8388	1.44146	1.90115	1.72569	1.96252	1.72175	0.195095	0.25036	0.247608
Atp6ap1	1.14855	1.37135	1.83801	0.97903	1.22855	1.09874	1.17957	1.50746	1.41277	0.894659	1.59214
Akap9	1.58488	1.88201	1.83791	1.85491	2.18358	2.23343	1.97942	2.52099	0.606851	0.688617	2.0437
Scn3a	0.853111	1.16069	1.83661	1.45894	1.63876	1.40876	0.985811	1.21364	0.116625	0.186993	0.103488
1500011B03Rik	2.10971	1.71747	1.83589	2.27644	1.82433	1.58752	2.49017	1.51389	0.25762	0.378267	0.499976
Sem1	2.24262	1.33001	1.83527	0.681094	2.78779	2.04189	0.356026	0.538621	3.21982	0.352016	2.40009
0610012G03Rik	2.13866	1.99077	1.83399	1.80566	1.78783	1.8172	2.18593	1.83821	1.59879	2.00215	1.85655
Prrc2c	1.70329	1.58714	1.83175	1.61194	3.10579	2.29741	0.996525	1.26778	1.22678	1.26608	1.65039
Wsb1	1.31611	1.55168	1.83131	1.82181	1.90654	1.94913	1.21708	1.91127	2.96112	1.12696	2.05004
Cltb	1.83786	1.56814	1.82567	1.77429	1.98283	1.70081	1.78358	1.60911	0.612675	0.529109	0.583815
Eef1e1	2.29484	2.23434	1.825	1.94426	2.02846	2.12171	2.33067	2.14991	0.530563	0.520544	0.462619
Glrx3	2.43452	2.60745	1.82391	1.80094	1.83426	2.05741	2.07148	2.49136	1.52968	2.46138	1.39604
2410015M20Rik	2.59668	2.18172	1.82362	2.60627	2.36949	2.31287	1.73122	1.71115	1.88154	2.41813	1.8686
Dlk1	4.63888	1.64118	1.82276	19.6146	0.578276	8.66065	0.841987	0.535984	0.413537	2.40948	2.06013
Prrc2b	1.6351	1.55292	1.8176	1.62261	1.99605	1.77098	1.28536	1.58123	0.487546	0.747328	0.816203
Herc1	0.83195	0.878828	1.817	0.871288	1.10401	0.817482	0.753381	0.795796	0.516936	0.39379	0.811399
Cdk14	0.556642	0.525766	1.81635	0.214996	0.257878	0.252278	0.182197	0.501879	0.202679	0.192298	0.450223
Capzb	2.37212	2.61424	1.81325	2.28786	1.94277	2.12923	2.61391	2.21535	4.69905	5.04652	1.60366
Rab1a	1.70927	1.93556	1.81178	1.77259	1.53736	1.53981	1.94362	2.20793	1.44777	1.47009	1.1665
Dlg4	1.40785	1.11431	1.81105	1.1767	1.69592	1.28113	0.72754	0.931356	0.458398	0.241798	0.832191
Tnrc6c	1.65838	1.63076	1.80924	2.07559	1.78747	2.07524	1.53201	3.47842	0.603756	0.912805	0.721813
Fam49b	1.89844	1.65736	1.80824	1.47465	1.40664	1.51541	2.05023	1.61885	3.83383	0.832606	0.903887
Pdxp	1.48479	1.00026	1.80616	0.589986	1.86459	1.67239	0.463604	0.672783	0.362219	0.0188315	0.517733
Higd2a	2.48219	2.35022	1.80391	2.5927	2.02525	2.19568	2.28972	2.10217	2.80896	1.60599	1.84007
Pfdn4	2.01945	2.12685	1.80251	2.41036	1.75341	1.99653	2.01328	1.88694	0.475988	0.73561	0.562825
Mat2a	1.77153	1.79191	1.80217	1.73849	2.26414	2.03267	1.71313	2.08825	1.5751	1.50953	3.1771
Kidins220	1.64627	1.47171	1.80072	1.12807	1.81041	1.52092	1.4355	1.34775	0.430028	0.525454	2.02986
Spock2	0.955154	0.933658	1.80018	0.877194	1.39932	1.05114	0.530262	0.756896	0.160396	0.416463	0.354237
Tmbim6	1.43459	1.25153	1.79738	1.27674	1.67931	1.24641	1.04979	1.14795	5.02331	2.32527	4.22302
Jph4	1.20163	0.98199	1.79645	1.15199	1.21183	1.04799	1.23842	1.33426	0.122336	0.13835	0.136528
Khdrbs1	1.91188	2.42574	1.79629	2.30597	1.82678	1.99727	1.98283	3.25938	1.22278	1.95064	0.837464
Dnmt3a	0.976528	0.937814	1.79443	1.33271	1.45599	1.15617	0.724094	0.877098	0.842089	0.979436	1.02877
Rraga	1.5615	1.93313	1.78963	1.67942	1.75107	1.5938	1.5791	2.26368	0.740756	0.97553	1.61102
Gnaz	1.68388	1.63989	1.78658	1.7857	1.87041	2.18627	1.48205	1.56054	0.165853	0.14516	0.296771
Mirg	0.388224	0.282468	1.78519	0.34888	0.61198	0.277638	0.243219	0.288938	0.0757245	0.208115	0.0751608
Gramd1a	1.16732	1.37128	1.78173	1.37635	1.14355	1.29198	1.36664	1.93917	0.943282	0.618747	0.96726
Ralyl	1.06152	0.971454	1.77953	0.689631	1.46046	1.6913	0.666524	0.984462	0.116889	0.0783442	0.220551
Fos	2.55892	1.80709	1.77816	1.8788	3.25381	1.37122	0.756826	0.696505	4.58789	3.6732	10.4441
Zfr	1.8139	1.45591	1.77791	1.67119	2.14643	1.83174	1.26839	1.41607	0.685648	0.787743	0.848019
Hnrnpc	2.21538	2.58081	1.77784	3.19883	2.11462	2.52337	2.10661	2.89921	1.4027	3.02941	1.1939
Shank1	0.927314	1.13131	1.77463	1.37557	1.08695	1.0879	1.25206	1.81002	0.122018	0.16816	0.123066
Gnai2	4.33724	3.01957	1.7742	4.13547	4.16361	2.97955	3.57678	1.92463	10.124	4.61853	5.3572
Etnk1	1.12239	0.92873	1.77339	0.928404	1.31697	1.19204	0.630473	0.826051	0.605172	0.482699	1.44457
Olfm2	1.13665	0.56206	1.77282	0.343335	3.37742	1.16374	0.283402	0.490585	0.16516	0.00685521	0.187725
Stx12	1.92424	2.047	1.77268	1.79987	1.91337	1.89487	2.39611	2.25218	0.831259	0.993747	0.909084
Idh1	1.95541	2.86135	1.77264	1.80685	1.5149	1.81346	3.31142	2.94005	0.602162	0.899625	1.65292
Zranb2	1.18534	1.21065	1.77232	1.1742	1.3693	1.38713	0.97827	1.38115	0.569155	0.672007	1.21413
Hnrnpr	1.73016	2.08909	1.77224	2.39935	2.02861	2.37431	1.74355	3.04296	1.05213	1.53928	1.01338
Emc6	1.98357	1.85245	1.77094	1.71298	1.69454	1.98515	1.62426	1.63865	1.16815	0.874968	1.53113
Psma4	2.13707	2.46488	1.76892	2.17271	1.74905	1.9383	2.31529	2.47032	1.40975	3.456	1.51115
Smarca2	1.74265	1.34551	1.76798	1.54028	1.37551	1.56181	1.72631	1.80555	0.633691	0.908971	0.563944
Sumo3	2.131	1.97167	1.76776	2.63087	2.22908	2.2765	2.44038	2.28841	1.31797	1.93159	0.68001
Phlda1	0.427092	0.939222	1.76702	0.491194	0.645509	0.467838	0.586769	0.584052	0.505897	6.99471	0.236449
Tmem158	1.27498	1.03968	1.76624	0.835879	2.74629	1.06088	0.81655	1.01504	0.185542	0.679268	0.313679
Tspyl4	1.95231	1.77986	1.76624	1.77208	2.21497	2.06286	1.49899	1.64378	0.235937	0.322595	0.306683
Adgrl3	1.10318	0.957291	1.76621	0.580153	2.04917	1.11949	0.979389	1.0014	0.150798	0.206481	2.34558
Krtcap2	1.91647	1.959	1.76202	1.86206	2.04593	1.85171	2.2008	1.86823	1.74786	4.18743	2.11138
Fubp1	1.52472	1.9361	1.76112	1.97187	2.01494	2.06388	1.51438	2.41129	0.877746	1.29704	1.51735
H1fx	2.39176	2.04683	1.75883	2.62305	2.29554	2.42163	1.61312	2.20926	0.497141	1.58322	0.469222
Gls	0.94864	0.741184	1.75857	0.643743	1.1326	0.923363	0.653384	0.489358	0.574084	0.393763	0.620355
Usp9x	1.44207	1.22125	1.75848	1.39974	1.67115	1.41103	1.00961	1.02047	0.762071	0.750091	0.715537
Fam171b	1.69295	1.59662	1.75768	1.59896	2.13117	1.86585	1.11441	1.05935	0.202613	0.203759	1.66443
Dmrta2	0.0379347	0.0814733	1.75517	0.0326779	0.0498946	0.0452227	0.0305132	0.0576753	0.0287825	0.0791583	0.0165333
Gpr162	0.662839	0.833667	1.75417	0.689964	0.832852	0.777467	0.68975	0.92914	0.125118	0.216361	0.649183
Ppp3cb	1.41191	1.24777	1.7494	1.3014	1.43328	1.46173	1.23761	1.30223	0.531738	0.720169	0.725955
Slc6a1	0.787691	0.537647	1.74895	0.581256	0.984552	0.721232	0.598033	0.61205	0.246832	0.405524	12.4451
Pam16	2.30575	1.97342	1.74859	2.49142	1.89584	2.15388	2.00425	1.76972	0.638768	0.944354	1.02098
Nptxr	1.35649	0.976975	1.74847	0.754682	1.87338	1.0209	1.3083	0.592656	0.206928	0.139854	0.237353
Cmas	2.09393	2.38685	1.74677	1.77605	1.72968	2.03921	2.01251	2.29366	0.469165	0.728481	0.460164
Tspan6	1.35479	1.56054	1.74633	1.46992	1.96972	1.75691	1.72973	1.93397	0.287665	1.61651	0.997563
Tanc2	0.768355	0.779143	1.74593	0.753555	1.04671	0.875696	0.437273	0.774874	1.31055	0.187752	0.565682
Eri3	1.89747	1.58297	1.74553	1.91916	1.76705	2.10782	1.92183	1.69771	0.621822	1.42327	0.855306
Uqcrc2	1.78788	1.85164	1.74429	1.58874	2.10753	1.96121	1.59016	1.79345	1.30135	1.48644	2.16996
Tsen34	2.19558	2.11819	1.74354	2.05395	2.21525	2.32546	2.30314	1.7855	0.998267	2.58042	1.45541
Pitx2	0.0330078	0.186805	1.74314	0.0493161	0.0374377	0.0143898	0.0168159	10.0241	0.0339594	0.182571	0.143099
Cadm2	0.300874	0.440822	1.74258	0.222708	0.706545	0.239605	0.517316	0.475027	0.127146	0.0210181	2.95155
Glrx5	1.95399	1.67833	1.73992	1.59493	1.74532	1.89239	1.59954	1.57013	1.01991	1.47382	0.976197
Dlgap4	2.00953	2.16181	1.73902	2.13829	1.8298	2.15433	2.86932	3.00011	0.716311	1.16379	0.794425
Ebf3	0.0366395	0.494681	1.73893	0.0391455	0.0234141	0.0153474	0.0298237	0.913605	0.0715267	0.139246	0.0259438
Srpk2	1.26736	1.28316	1.73792	1.28857	1.38692	1.20665	1.34711	1.48324	0.576806	0.637208	1.24368
Dtx3	1.513	1.70726	1.73779	2.06741	1.65843	1.81836	1.81629	2.11455	0.379564	1.36394	2.03895
Psma6	2.00961	2.27085	1.73734	2.36956	1.94532	2.223	2.2746	2.44876	1.20441	2.091	1.46469
Tmem30a	1.44517	1.32016	1.73688	1.33423	1.38577	1.12123	1.08698	1.11604	0.991582	0.739635	1.57912
Dpysl5	1.25583	1.52795	1.73432	1.04674	1.1512	1.1768	1.6172	1.90439	0.11007	0.271699	0.142408
Fam57b	1.38923	2.05578	1.73255	1.6944	1.0966	1.56127	2.65499	3.07831	0.0672028	0.271901	0.079603
Ube2e1	2.53144	2.80733	1.73078	2.45469	2.25587	2.70166	2.53284	2.94018	1.00127	1.48319	1.27284
Palm	1.55284	1.7356	1.73057	1.32041	1.40123	1.41793	1.73603	2.10896	0.172274	0.648921	0.285667
Abr	0.974676	0.935409	1.72802	1.10832	1.08902	1.36939	1.01364	1.28629	0.397481	0.346974	1.58718
Arpc5l	2.2944	1.83508	1.72773	2.08558	2.05518	2.0673	1.71218	1.59861	1.35925	1.11068	1.08963
Ncor1	1.34427	1.52232	1.72745	1.37206	1.42332	1.29819	1.465	1.82779	1.38264	1.8493	1.23126
Psmd4	1.93148	2.02763	1.72739	2.24144	1.89433	1.98702	1.80432	2.08822	1.25038	1.58962	1.46532
Srcin1	0.857499	0.787356	1.72113	0.646244	1.06854	0.82961	0.643644	0.758549	0.209613	0.147084	0.210084
Tnik	0.929958	0.993169	1.72058	1.09354	1.37127	1.13828	0.940021	1.19001	0.165841	0.160047	2.90839
Arpc3	2.39308	2.89617	1.72006	2.03525	2.09081	2.43612	3.32158	2.56157	4.74831	2.90522	1.30334
Samd14	1.50681	1.84711	1.72006	1.97581	1.28777	1.77799	2.29327	2.497	0.163353	0.479555	0.359428
Pin1	2.16756	1.94878	1.71916	1.82196	1.77555	1.89184	1.97539	1.80581	0.810025	1.20836	1.11948
Ptprn	1.51001	0.915417	1.71791	1.17413	1.57088	0.679756	0.68597	0.473404	0.25644	0.0672729	0.229236
Cbx5	1.78829	1.71822	1.71785	1.83733	1.74668	2.02151	1.80725	1.83536	0.658211	1.45873	1.95952
Tra2b	1.71964	1.72639	1.71662	2.82119	1.83411	2.20833	2.16657	2.23459	1.4239	1.90331	1.22887
Rac1	2.03024	2.13376	1.71652	1.84213	1.6553	1.83187	2.15673	2.05066	3.51593	2.80827	2.06902
Ube2k	1.41877	1.53355	1.71457	1.44598	1.32948	1.28014	1.41356	1.69237	0.831196	1.3088	0.873325
Skp1a	1.95715	1.9463	1.71244	1.9089	1.74292	2.0564	2.08052	2.11657	0.875125	1.59351	1.08237
Rab11a	1.82677	2.10558	1.71226	1.87638	1.26858	1.33379	2.3363	1.99622	1.50259	1.7121	1.03595
Eif3e	2.8671	3.14114	1.71068	3.27487	3.15725	3.26032	3.10422	3.08703	2.45256	4.27725	1.25304
R3hdm4	1.34696	1.67575	1.70852	1.36687	1.12682	1.21641	2.02985	2.00513	0.857591	1.05765	0.645769
Mrps33	1.78867	1.76187	1.70714	1.93001	1.83391	1.95795	1.50614	1.68504	1.70927	1.81566	1.81085
Rcn2	1.81617	2.06088	1.70675	2.366	1.90257	1.75179	2.12325	2.37695	0.717375	1.76016	5.15394
Enho	1.42242	1.29165	1.70566	0.934073	1.23904	1.52629	1.12818	0.891542	0.32438	0.316722	5.20827
Pea15a	3.12742	1.61714	1.70387	2.7944	2.28922	2.36197	4.22219	1.34587	1.09113	0.949053	3.12608
Arf3	1.4942	1.09195	1.70261	1.13173	1.19563	1.25216	1.58271	1.29924	0.776659	0.697944	0.642076
Puf60	1.54629	1.64444	1.70257	2.03567	1.78664	1.85102	1.93212	2.06042	1.23589	1.54829	1.86752
Pbx3	0.110265	0.452617	1.70182	0.0793708	0.0619185	0.176198	0.0900532	1.05677	0.196477	0.47522	0.072669
A730017C20Rik	2.38196	1.88363	1.69828	2.30239	2.99044	2.81679	1.22005	2.14712	0.273007	0.224371	0.372986
Txnl1	2.00448	1.86155	1.6969	1.91159	2.0366	2.12182	1.66746	1.80421	1.5321	1.89614	1.70228
Vbp1	2.3818	2.47455	1.69545	2.86135	2.67445	2.65744	2.62557	2.10607	0.69053	0.808674	0.778771
Magee1	0.929671	0.998865	1.69534	0.789533	1.35096	0.952845	0.781332	1.26817	0.220381	0.280461	0.496584
Ptbp2	1.24343	1.55823	1.69318	1.34032	1.6361	1.46595	1.50696	1.83621	0.327617	0.454432	0.879455
Syn2	1.34609	0.915358	1.69273	0.598757	1.63424	1.23551	0.398242	0.582835	0.299325	0.0485442	1.15593
Sar1b	1.24267	1.39861	1.69038	1.21818	1.58033	1.49682	1.16537	1.0713	1.18977	0.922746	2.13401
Csrp2	0.820782	1.31678	1.68805	0.866724	0.634363	2.91375	1.11373	0.779813	0.342305	2.56484	0.0920019
March6	1.26825	1.08292	1.68652	1.21054	1.32691	1.24369	1.06099	1.03186	0.496374	1.16655	1.2731
Cyb5a	2.28357	2.3654	1.68384	1.78981	2.20132	2.22685	2.81344	1.75034	2.609	2.15636	2.05257
Strbp	1.26044	1.54129	1.68358	1.32634	1.31139	1.50933	1.59535	1.54712	0.235645	0.582383	0.775986
Spint2	1.55517	0.900388	1.68316	1.24497	1.93737	1.51901	0.941054	1.18973	0.171336	0.0626031	0.119782
Napb	0.83501	0.91317	1.68265	0.513864	0.530004	0.675372	0.523081	0.91133	0.193307	0.0989902	0.329242
Polr2f	2.19824	2.04621	1.68172	2.74451	2.13354	2.71522	2.37513	1.91338	1.04296	2.05889	1.22443
Actr3	2.23251	2.28008	1.67954	1.90883	1.72639	2.01748	2.64613	2.14758	2.84624	1.62094	0.907639
Nrep	1.03123	2.44206	1.67907	2.01422	1.31036	2.28384	3.23794	4.12801	0.442247	4.63328	0.349147
Csde1	2.13271	2.19057	1.67896	2.23974	2.16715	2.23401	1.85214	2.12307	1.48003	1.4771	1.35443
R3hdm1	0.853587	0.759842	1.67851	1.12497	0.91957	0.984795	0.798551	1.00622	0.460101	0.540101	1.24455
Cct3	2.49274	2.61347	1.6737	2.48105	2.35627	2.49216	2.62065	2.44199	1.3903	1.90609	1.47645
Lrpap1	1.30625	1.03671	1.67331	1.15826	1.56501	1.39341	0.9085	0.972998	1.02267	1.29133	2.50083
Matk	0.523405	0.37061	1.67309	0.287822	0.443696	0.470203	0.247291	0.400446	0.660947	0.032802	0.183282
Ctnnd2	0.857365	1.0642	1.67293	0.730769	1.29635	1.45806	0.566585	0.978129	0.207036	0.0803177	1.63192
Tprgl	1.97426	1.81226	1.67138	1.25237	1.67612	1.31939	1.92921	1.5441	1.84871	1.72102	1.68897
Pnck	1.11473	0.916663	1.66989	1.62207	1.45115	1.5792	1.16021	1.1275	0.20952	0.0985231	0.269871
Grik5	1.07961	1.0098	1.66923	1.31247	1.24674	1.13126	0.921239	1.09589	0.198148	0.448076	1.05866
Nsf	0.974913	0.819486	1.66902	0.604102	0.909712	0.856843	0.602051	0.775622	0.413675	0.249158	0.534925
Uba1	1.6677	2.08981	1.66821	1.66352	1.42952	1.6277	2.31522	3.18578	0.651387	1.62573	0.9113
Sf3b2	1.71032	1.79402	1.66761	2.14095	2.23947	2.12791	1.38142	2.2576	1.78245	1.6452	1.22362
Ube2d1	1.50462	2.36762	1.66735	1.49223	1.14639	1.56489	2.24977	3.09874	0.383613	0.967591	0.430484
Epn1	1.46484	1.5372	1.6661	1.42325	1.2263	1.53266	1.62246	2.01999	2.52404	1.17747	0.745433
Brwd1	1.59922	1.96578	1.66408	2.10988	1.42518	1.82037	2.14937	2.59263	0.400927	0.847209	0.643215
Phip	1.44676	1.51191	1.66398	2.40782	1.43405	1.69365	1.00432	1.61871	0.891316	1.37986	1.08257
Cdh13	0.717695	0.370342	1.6628	0.106361	0.384114	0.412234	0.846813	0.295439	0.0822601	0.0525682	0.598897
Pdia3	1.99914	1.89588	1.66237	1.83498	1.91126	1.78347	1.74886	1.77724	3.38167	3.54395	3.33798
Nrgn	1.05052	0.958228	1.66211	0.273168	0.344828	0.534746	1.46518	0.669777	0.170245	0.00192688	0.16202
Nop56	1.11554	1.13998	1.6613	1.1472	1.69094	1.29014	1.11173	1.38553	0.792317	0.793594	0.660626
Bin1	1.08453	1.11985	1.65839	0.861576	1.20977	1.17016	0.972226	1.04051	9.16462	0.908249	0.794084
Sqle	1.45647	1.61347	1.65815	1.15011	0.900292	1.05674	1.29956	1.62416	0.272967	0.664073	2.80846
Chd3	1.03118	1.22321	1.6565	1.25238	1.11694	1.11772	2.91018	2.15812	0.338499	1.37843	0.263309
Polr1d	2.57267	2.24098	1.65599	2.04547	2.2174	2.18647	2.8138	2.20863	2.34698	2.65489	1.38589
Srsf6	1.89161	2.00951	1.65558	2.57785	1.93366	2.11159	1.77151	2.5054	2.00153	2.3722	2.13287
Sars	1.65355	1.64322	1.6549	1.56265	1.62047	1.75657	1.45031	1.58066	0.805489	1.01231	0.968286
Raph1	0.797982	0.874969	1.65404	0.956346	0.886805	0.918599	0.83457	0.918449	0.320644	0.462212	0.296591
Nbdy	2.07115	1.25231	1.64991	0.600561	2.0909	1.85242	0.294324	0.526727	0.800957	0.0747753	0.699203
Ppp1cb	1.41663	1.55921	1.64917	1.48768	1.4115	1.38462	1.45642	1.97987	0.730364	0.90515	0.913469
Usp34	1.40757	1.18616	1.64748	1.44564	1.80647	1.47741	0.973426	1.24604	0.704884	0.663428	0.838379
Snap91	1.0002	0.905677	1.64538	0.695714	1.04046	0.777433	0.931632	0.988243	0.177895	0.150382	0.2528
Stard3nl	2.44781	2.10384	1.64537	2.09181	1.9359	2.00755	2.50336	1.83758	1.60464	1.32584	0.798488
Stk25	1.40337	1.42868	1.6448	1.17515	1.44203	1.42773	1.23732	1.31715	0.501247	0.775983	0.797336
Trappc2l	2.11438	1.99068	1.64399	2.31085	2.18386	2.27308	2.02229	1.81808	1.27293	0.920399	0.723763
Mrpl12	1.85603	1.72277	1.64389	1.61422	1.59474	1.77354	1.82097	1.62144	0.984742	1.15557	1.05716
Irf2bpl	1.14241	1.46505	1.64377	2.09004	1.90034	2.22949	1.33308	1.74381	0.873026	0.44618	0.869476
Eif4g1	1.31109	1.11897	1.64274	1.29845	1.41488	1.2808	1.01026	1.10926	0.935319	1.35632	1.41588
Atp6v1g2	1.69926	1.24706	1.64235	1.00638	1.58481	1.51403	0.988705	1.06875	0.223347	0.106679	0.313049
Klhdc2	2.02272	1.95496	1.64159	2.17682	1.96865	1.97085	1.50538	2.29664	0.732489	1.38296	0.695058
Apoe	0.669748	0.721306	1.64075	0.59276	0.923886	0.792156	0.112148	0.354218	98.1401	7.79867	288.814
Gstm5	2.08349	1.82951	1.64057	1.7411	1.81028	1.63802	2.21337	1.39531	0.588723	2.26159	4.6153
Trmt112	2.18327	1.82924	1.63962	2.32679	2.13853	1.94281	1.49581	1.80141	1.99235	1.76497	1.06811
U2af1	2.1012	2.37855	1.63861	2.80836	2.3358	2.37162	3.05459	2.66341	1.31573	2.2374	1.25198
Ilf2	1.41329	2.09103	1.63774	1.81199	1.56385	2.07928	1.71934	2.69077	0.58544	1.16046	0.996867
Psmc5	1.6784	2.04037	1.6369	1.73981	1.83893	1.66509	1.75818	1.84554	1.39395	1.40928	1.55238
Bclaf1	1.2352	1.15302	1.63665	1.27872	1.39064	1.42981	0.929352	1.33594	1.0377	0.86633	1.2874
Rit2	1.90741	1.22632	1.63589	1.62628	2.33592	1.95108	1.58688	1.23365	0.272425	0.0867716	0.309293
Meaf6	1.44606	1.63073	1.63577	1.60668	1.49754	1.72096	1.5063	1.5597	0.575865	0.715176	0.748755
Eif3i	2.38448	2.31085	1.63547	2.47129	2.34115	2.25952	2.71232	1.8039	2.11021	3.14772	1.58903
Tmem147	1.65463	1.61318	1.63351	1.65781	1.48091	1.42931	1.71601	1.5795	0.762881	1.75733	1.79503
Sez6l2	1.10911	1.01144	1.63236	0.874931	1.35542	1.01723	0.848964	1.08528	0.136548	0.13268	0.104564
Haghl	1.15226	1.10731	1.63003	1.23493	1.40152	1.21747	0.916296	1.13241	0.479553	0.462279	1.56778
Parp6	1.53255	1.83587	1.62648	1.59811	1.01847	1.16524	2.34786	2.37758	0.176027	0.37804	0.264926
Tmem163	0.287389	1.2187	1.62447	0.151386	1.65389	0.158564	1.23994	1.19862	0.0527412	0.121031	0.052049
Ndufs2	1.70249	1.94695	1.62435	1.75752	1.74759	1.82833	1.51749	1.80908	1.45772	2.0648	2.07743
Tmem191c	0.631606	0.436196	1.62307	0.349347	0.914054	0.660882	0.273363	0.385482	0.173659	0.13527	0.165429
Ppp3r1	1.57482	1.33833	1.62095	1.58332	1.37883	1.46904	1.47944	1.48279	0.633915	0.506907	0.532169
Map6	1.34819	1.36327	1.62053	1.29529	1.56506	1.32909	1.4044	1.36393	0.144675	0.296456	0.17572
Mettl9	1.89697	2.36197	1.62013	2.25354	2.21428	2.3894	2.55696	2.52539	1.44715	2.2387	1.59064
Abhd8	1.65811	1.6441	1.61992	1.7485	1.50336	1.57287	1.42334	1.65148	0.374535	0.860772	0.774388
Znrf1	1.49687	1.4067	1.61954	1.47433	1.30541	1.47924	1.56382	1.80729	0.514131	0.553409	0.613157
Tnrc6a	1.03247	0.851829	1.61936	1.22445	1.18884	1.07564	0.782478	0.862226	0.630654	0.946796	1.07937
Arpp19	1.96709	1.85404	1.61669	1.98687	1.64601	1.93782	1.82448	1.88439	1.60012	2.19017	1.31123
Rtl8a	1.91645	1.11466	1.61621	0.711621	2.42056	1.89491	0.37967	0.476783	0.472248	0.0787989	0.759748
Pou2f2	2.56742	3.614	1.61454	3.28743	3.94751	6.00955	0.740394	3.30589	2.16807	0.52093	0.273351
Snrpb	2.27336	2.31888	1.61389	2.86601	2.52786	2.64405	2.40232	2.20347	3.11384	3.61339	1.78395
Anapc11	1.99068	1.99088	1.61358	1.68778	1.79651	2.30693	2.09212	1.89403	1.14499	2.70392	1.02954
Ube2i	1.91355	2.05931	1.61308	2.42573	1.70216	1.9502	1.96335	2.57443	2.20826	2.44545	0.941578
L1cam	1.54494	1.27171	1.61145	1.09169	1.49029	1.18956	1.89051	1.22849	0.160315	0.2394	0.0952745
Gabrb3	1.32915	1.10766	1.61117	1.59703	1.44135	1.31468	1.21481	0.912099	0.154683	0.0975483	0.337209
Tubb4a	1.82431	2.69732	1.60832	1.89598	1.72045	1.89225	1.78868	2.73846	0.169143	0.361978	0.19396
Snrpd3	2.05849	2.10488	1.60638	2.23275	2.22901	2.59613	2.20215	2.15433	1.17739	1.68329	1.08623
Bnip3l	1.55088	2.05739	1.60615	1.56766	1.49174	1.64808	1.45035	2.09137	1.60668	2.12899	1.17363
Eif3a	1.80557	1.63928	1.6057	1.86168	1.99655	1.9736	1.7138	1.6871	1.74441	1.49697	1.09218
Mageh1	1.50591	1.80701	1.6016	2.46531	2.37612	1.95625	1.40252	2.06965	0.219572	1.24582	1.21058
Nudc	1.92793	1.89742	1.60075	2.19252	2.11855	2.31808	1.5921	1.92131	1.69068	1.71699	1.0014
Ap1s2	2.93408	1.65232	1.60039	0.971128	8.77127	0.765904	1.55148	1.08803	0.725791	0.332102	0.401213
Tceal9	2.244	1.29544	1.60028	0.862507	2.96651	1.81508	0.469575	0.430525	1.01285	0.265819	0.853969
Tmem246	1.42649	1.0381	1.59731	0.88824	1.37449	1.29943	1.12299	0.886595	0.152858	0.312366	1.14968
Chchd6	1.48012	1.38574	1.59364	1.34828	1.44944	1.91742	1.55509	1.37389	0.309457	0.335017	0.557485
Cacna1a	0.718715	0.502354	1.59089	0.46501	0.903567	0.658902	0.497357	0.409139	0.374984	0.221187	0.432452
Ndufs3	1.69623	1.70354	1.5891	1.93529	1.77297	1.92487	1.67622	1.646	1.31702	1.63323	2.23481
Chmp5	1.77922	2.01317	1.58734	2.27472	1.90972	1.73996	1.80972	2.23306	1.24825	1.32937	0.784373
Cadm3	0.932672	0.882486	1.58697	0.533031	0.915827	0.612956	1.31855	1.09101	0.105432	0.134851	0.141169
Atp8a1	1.21846	0.862716	1.58588	0.772098	1.47891	1.3603	0.388219	0.567946	0.757248	0.0893113	1.19294
Dnaja2	1.84679	1.87938	1.58468	1.70293	1.7968	1.82467	1.53193	1.97052	1.29841	1.41386	1.37243
Cdk4	3.01693	3.18939	1.58441	4.26291	2.06083	2.873	3.59433	4.0248	2.07263	6.11818	1.43751
Snu13	1.72813	1.09032	1.58414	0.556956	2.4696	1.76977	0.319601	0.426779	1.31371	0.11431	1.25841
Ndufa10	1.54983	1.71806	1.58395	1.59224	1.57484	1.86692	1.6226	1.67207	1.06812	1.55445	1.68021
2900097C17Rik	0.895879	0.592975	1.58203	0.267109	0.891018	0.774217	0.30128	0.361308	0.665468	0.0839426	0.848827
Soga3	1.60399	1.63356	1.58069	1.45125	1.56669	1.77413	1.59033	1.68934	0.137958	0.218465	0.638424
Ube2e2	1.49434	1.33737	1.58055	1.19065	1.69233	1.57207	1.40549	0.920857	0.274276	0.841565	0.764597
Rack1	1.91192	1.38203	1.57951	0.69905	3.11585	2.47008	0.243466	0.409965	6.40099	0.277652	1.83699
Tmx2	1.27139	1.26898	1.5787	1.14631	1.27736	1.05995	1.04663	1.23744	0.587162	0.563578	2.53935
Tmem258	2.03715	2.05335	1.57864	2.56776	1.98753	2.10121	2.78994	2.25553	1.5716	2.7288	1.16194
Hnrnpd	1.56283	1.52608	1.5783	1.60858	1.96161	1.64174	1.30901	1.57079	1.64363	1.37397	0.993175
Arl3	2.0535	2.27943	1.57693	2.50304	2.12033	2.27106	2.23114	2.17491	0.540262	1.70276	1.54563
Gabrb1	0.458569	0.541891	1.57691	0.374605	0.927189	0.676854	0.228859	0.388507	0.144896	0.0322141	0.895904
Scn3b	0.868851	0.849904	1.57587	0.703262	0.873218	0.784578	0.981205	1.31925	0.0835593	0.0860463	0.140418
Acat2	1.7073	2.24184	1.57553	1.21259	1.01743	1.38568	1.69336	2.02648	0.310178	0.941839	0.703368
Pcdh19	0.829144	1.04585	1.57429	1.05156	3.10367	1.66165	0.574711	0.387162	0.178493	0.0452887	0.526014
Cbx6	1.06922	0.989273	1.57425	1.22462	1.40765	1.00935	0.768633	0.877106	0.365024	0.489997	0.672919
Ap3s1	1.74536	2.21833	1.56914	1.43124	1.19291	1.25689	2.04051	1.66394	0.796134	1.71783	1.24204
Lsm7	1.99435	1.53016	1.56861	1.86205	2.1679	2.22171	1.3346	1.15158	0.730362	1.17063	1.04067
Cers4	0.931553	0.755185	1.56766	0.75683	1.04741	0.92011	0.695703	0.646926	0.133825	0.446452	0.20701
Car10	1.7418	0.801441	1.56656	0.452209	1.00579	0.6438	0.981884	0.255406	0.158757	0.0425568	0.59521
Ankrd17	0.975193	0.861064	1.5628	1.00501	1.12925	1.04102	0.614277	0.884807	0.748527	0.785738	1.11902
Tro	1.37374	0.841489	1.56242	1.27976	1.42112	1.31867	0.750572	0.617923	0.202265	0.254457	0.250562
Fdft1	1.58837	2.15556	1.56207	1.27683	1.13006	1.25283	1.66594	2.06321	0.252147	0.630392	2.15881
Pmvk	1.94266	1.75411	1.5617	1.59762	1.88727	1.63562	1.88016	1.31498	0.403825	0.796854	1.07277
Ccdc184	1.1864	1.24484	1.55687	1.28136	1.44875	1.35001	1.19382	1.18982	0.112403	0.117143	0.16439
Disp2	0.820694	0.64003	1.55438	0.570362	1.00306	0.759493	0.382428	0.522379	0.138362	0.0553049	0.178315
Mob4	1.54444	1.72233	1.55428	1.73394	1.41818	1.59174	1.57916	1.73365	0.869171	1.05847	1.38087
Thoc7	1.4625	1.57643	1.5534	1.44638	1.40241	1.35251	1.46351	1.37302	0.892785	1.43527	1.10345
Manf	1.92287	1.61512	1.55172	1.77416	2.02786	1.42935	2.02057	1.20518	1.90871	2.01004	2.39938
Pnn	1.17346	1.22893	1.54995	1.5309	1.88967	1.70024	0.989726	1.40802	1.04871	0.937913	2.79961
Tenm1	0.883298	0.468973	1.54846	0.0894968	0.46922	0.463975	0.529676	0.682204	0.10258	0.0330463	0.119089
Map4	1.64506	1.2769	1.54801	0.785998	1.19693	1.03545	1.41659	0.882937	0.6554	0.622633	0.670882
Rer1	1.77887	1.57491	1.54715	1.44099	1.78149	1.54653	1.59611	1.37176	1.85447	2.43647	1.85291
Mapre2	1.50148	1.64476	1.54567	1.16858	1.35727	1.34843	1.41435	1.63607	0.517971	0.567598	0.734114
Ptpn5	0.781804	0.962149	1.545	0.609009	0.999414	0.975937	1.37994	1.2707	0.092914	0.135506	0.362511
Mtx2	1.34768	1.46805	1.5447	1.18899	1.27246	1.45185	1.32006	1.50091	0.694766	1.20748	0.668512
Tmem50a	1.81757	1.94405	1.54456	1.61551	2.03161	1.52716	2.05323	1.93173	3.09145	1.85443	1.31943
Arl4c	1.33414	1.48334	1.54263	1.18197	1.21126	1.46096	0.98076	1.91868	2.10487	0.199793	0.320908
Ppp1cc	2.03641	2.33043	1.54215	1.99557	1.62305	1.82603	2.14796	2.54371	1.9051	2.59466	1.22189
Pitpna	1.40299	1.29665	1.5413	0.932212	1.25085	1.12051	1.13223	1.11975	1.66175	0.990505	0.790225
Rad23b	1.64298	1.79368	1.53796	1.69821	1.24383	1.55365	1.57176	1.98422	0.764862	1.25067	0.873914
Xpr1	2.27325	2.06548	1.53774	1.68333	1.9678	1.56127	2.60063	1.03404	0.366996	0.444601	1.55819
2210016L21Rik	1.85553	1.56027	1.53645	1.43175	1.92966	2.05742	1.59066	1.41206	0.458178	0.746817	0.8789
Zmynd11	1.09777	1.07055	1.53225	1.17968	1.43015	1.33229	0.932004	1.1708	0.73944	0.740922	1.15148
Cyth2	1.48782	2.18548	1.53042	2.21625	1.29713	2.06138	1.87773	3.51419	0.619452	0.965044	0.772957
Gm2694	0.995695	1.19713	1.52677	0.152306	0.357621	0.324864	4.41071	1.21892	0.0190467	0.240215	0.0194022
Pbrm1	1.61071	1.6957	1.52578	1.7912	1.7587	1.66215	1.48424	1.56539	1.07853	1.46321	1.18722
Khdrbs3	2.03364	1.57468	1.5255	0.905105	1.76553	2.6123	0.810324	0.488905	0.493106	0.103584	0.516881
Nipsnap3b	1.52489	1.81017	1.52488	1.21118	1.25227	1.49283	2.2479	1.79933	0.734886	0.535559	0.352256
Cbln1	0.519905	0.40226	1.52467	0.0789188	0.183211	0.241128	2.61011	0.505556	0.0270799	0.168042	0.0289833
Fry	0.746942	0.680932	1.52423	0.583575	1.0359	0.865472	0.597597	0.757854	0.358686	0.154513	1.45961
Gps1	1.15347	1.26675	1.5239	1.09778	1.25474	1.29572	1.10596	1.56223	0.933006	1.17618	1.18889
Fam19a5	0.665275	0.546723	1.52358	0.615703	0.876832	0.460176	0.293828	0.356753	0.137797	0.149098	1.14681
Nrn1	0.15503	1.527	1.52267	0.0364889	0.0264068	0.0160829	0.0252682	1.26482	0.07233	0.0741477	0.13217
Dnajc7	1.44293	1.78646	1.52253	1.67377	1.72395	1.62102	1.7532	1.94358	1.05484	0.919777	0.885841
Dpy30	1.43395	1.42572	1.52059	1.31391	1.474	1.38472	1.59835	1.52872	0.756142	1.02469	0.612695
Bag1	1.89462	1.87086	1.51951	1.4447	1.52137	1.48456	1.9861	1.5768	1.91169	1.97337	0.676583
Cops9	1.66742	1.00805	1.51892	0.449923	1.79103	1.427	0.277302	0.380549	1.36596	0.0673576	1.45267
Psme1	1.67931	1.48107	1.51746	1.41934	1.48808	1.60615	2.06988	1.33224	2.18039	0.958763	0.607711
Dazap1	1.74882	1.92132	1.51641	1.58086	1.37804	1.35223	1.99579	2.44821	0.980635	1.81939	0.811358
Arl2bp	2.3525	2.1547	1.51638	2.28491	1.57105	1.61884	2.23192	2.22701	0.625288	1.34649	1.39437
Elof1	1.46018	1.50711	1.5148	1.55282	1.50295	1.75609	1.48658	1.42757	1.09813	1.30377	0.932823
Pde10a	1.07161	0.727407	1.51446	0.50501	0.919808	0.481592	0.49217	0.494144	0.0729893	0.153531	0.337905
Ebf2	0.0235769	0.304078	1.5135	0.0360147	0.00861699	0.0089699	0.0359989	0.772541	0.0280529	0.0559607	0
Nova1	0.400496	0.632049	1.51169	0.30333	0.456085	0.452913	0.58889	1.29866	0.176486	0.107818	0.391626
Sh3bgrl	1.20003	1.67667	1.51115	1.23117	1.61462	1.71083	1.57774	2.17322	0.445485	1.68345	0.552549
Pdia6	1.26573	1.35519	1.50824	1.1196	1.60308	1.22361	1.58382	1.268	2.58679	3.4971	3.47394
Nap1l4	1.49549	1.76207	1.50712	1.57633	1.63859	1.68457	1.52608	2.18268	0.957755	1.07428	1.05799
Bbip1	1.99232	1.80859	1.50593	1.63941	1.68019	1.67471	2.13595	1.54338	0.752211	1.10132	1.10755
Birc6	0.82482	0.711511	1.50545	0.836561	1.19343	0.873756	0.48855	0.635371	0.611737	0.470619	1.01001
Sgip1	0.760608	0.767606	1.50514	0.854875	0.949733	0.928287	0.439872	0.923564	0.115837	0.107738	0.715333
Mea1	1.73077	1.63409	1.50425	1.62716	1.14257	1.35644	2.109	1.51913	0.495125	1.32733	0.458472
Strap	2.31747	2.1406	1.50393	2.4717	2.00869	2.33545	2.23638	2.05056	1.20521	1.89734	1.22944
Ddx24	1.29502	1.09212	1.50269	1.13126	1.44315	1.38605	0.944051	1.19173	0.693995	0.605476	1.09145
Strn4	1.28292	1.40717	1.50179	1.54744	1.29652	1.35611	1.3811	1.9439	0.450117	0.766566	0.496804
Clcn3	1.03228	0.956785	1.50139	0.973425	1.28645	1.01739	0.654039	0.89444	0.431976	0.426723	1.71512
Dcun1d5	1.71641	1.59335	1.50018	1.6536	1.46413	1.55134	1.5381	1.51691	1.21732	1.99374	1.09352
Ctsl	1.47097	1.52189	1.49913	1.63451	2.00045	1.54852	1.0427	0.990483	23.6636	2.9208	11.3389
Vti1b	1.6785	1.45383	1.499	1.26925	1.33647	1.39396	1.77462	1.40894	0.570637	0.950167	0.565137
Rgs17	1.2333	0.964817	1.49896	0.989939	0.949499	1.12352	1.11502	1.05909	0.131375	0.107421	0.239282
Abi2	1.20691	1.12293	1.49771	1.35364	1.29296	1.34201	1.15246	1.2104	0.360013	0.447887	0.558344
Laptm4a	2.15701	1.82739	1.4972	2.60996	2.40328	2.45931	2.60247	2.21758	4.0741	16.0287	6.86689
Actr2	1.34905	1.29055	1.49718	1.1852	1.2829	1.23624	1.4308	1.22561	2.19483	0.670631	0.799033
Ankra2	1.38739	1.22683	1.497	1.48877	1.49705	1.5779	1.40692	1.25109	0.355911	0.421979	0.759628
Mrps24	1.69753	1.51083	1.49676	1.72063	1.47615	1.61025	1.80738	1.37426	1.05157	1.73818	1.56798
Smarcd3	1.34402	1.62534	1.49646	1.79457	1.83384	2.30386	1.77195	2.01175	0.215598	0.923034	0.796688
Ddost	1.16932	1.19192	1.49366	1.24845	1.63362	1.49294	1.01355	1.15458	2.03954	2.94488	2.31657
Syn1	1.21862	1.10707	1.49168	0.889994	1.01456	0.931666	1.14835	1.07722	0.160704	0.135191	0.283243
Rangap1	1.29023	1.27997	1.49126	1.2382	1.35331	1.42311	1.07538	1.47568	0.564795	0.381842	0.282941
1110008F13Rik	1.28676	1.50261	1.49065	0.974524	0.948847	1.06311	1.41808	1.71181	1.84638	1.78017	2.10933
Lamtor2	2.29603	2.00518	1.48214	1.99446	2.00355	2.1065	1.98267	1.68657	1.74788	2.05982	1.40826
Tmed10	1.30893	1.36508	1.48211	1.28396	1.79694	1.39033	0.965115	1.03079	2.14617	3.00882	2.88963
Rprm	1.02907	2.31838	1.48101	0.518636	4.86851	1.30715	0.919008	1.72187	0.178531	0.184237	0.176835
Msmo1	1.26904	1.11247	1.48034	0.894069	0.867274	0.769288	0.825803	0.889456	0.525053	0.431675	11.9303
Dtd1	1.54027	1.24855	1.47958	1.28612	1.90904	1.88404	0.989862	1.15154	0.305142	0.402143	0.385281
Denr	1.9062	1.80371	1.47913	1.75024	1.78716	1.85524	1.63963	1.74962	1.26249	1.6514	0.729425
Sfxn1	1.93375	1.59018	1.47771	1.39938	1.75961	1.70323	1.78476	1.81762	0.47089	0.451146	1.46367
Lmtk3	0.786072	0.661868	1.47714	0.556557	1.0978	0.928674	0.437132	0.58558	0.1173	0.0992343	0.174927
Mrpl30	1.86337	1.77626	1.47682	1.94602	1.70741	1.98988	2.08772	1.79929	1.12439	2.12773	1.20499
Mrpl41	1.68916	1.42147	1.47676	1.34653	1.35741	1.33191	1.19925	1.25121	0.581059	0.819318	1.13997
Gna11	1.53921	1.2842	1.47619	1.46955	1.83508	1.70924	1.31786	1.12583	0.428558	0.821251	1.50482
Chst1	0.955808	0.694656	1.47474	0.704675	0.960862	0.828973	0.592962	0.938585	0.20756	0.310342	2.57927
1110008P14Rik	1.31349	1.25332	1.47302	1.09747	0.948641	0.866222	1.09982	0.940218	0.210137	0.812396	0.279872
5330434G04Rik	0.670491	0.616499	1.47274	0.581054	0.852769	0.680348	0.343191	0.524307	0.0630284	0.0919773	0.111562
B230219D22Rik	1.40987	1.4818	1.472	1.69501	1.6621	1.70846	1.47388	1.69102	0.776487	1.08201	0.691474
Aco2	1.17089	1.41834	1.47199	1.39941	1.17515	1.36559	1.41854	1.38947	0.85067	1.09386	4.20529
Rbbp6	1.46994	1.37138	1.4718	1.9527	1.81018	1.84104	1.45647	1.60676	0.905606	1.11763	1.45776
Smarcc2	1.05731	1.17025	1.47046	1.31506	1.38602	1.29623	1.07139	1.52587	0.495277	0.677999	1.04068
Phyhipl	1.06977	1.14919	1.47017	1.03355	1.11667	1.21826	1.00285	1.81829	0.190574	0.114932	5.84235
Wbp5	2.65981	3.07234	1.46955	7.2601	2.06115	4.31645	4.9052	4.24121	0.579568	5.39854	0.332904
Maz	1.49265	1.51935	1.46806	1.30511	1.83391	1.54261	1.3029	1.62079	1.32377	0.838755	1.05538
Akirin2	1.78955	2.2703	1.46784	2.19336	1.63474	2.01344	2.45588	2.61224	1.4284	1.39935	0.928666
Ap1s1	2.1086	1.90167	1.46783	1.67599	1.64009	1.75227	2.81301	2.04604	0.773521	0.993555	0.55784
Nxf1	1.54331	1.73737	1.46482	2.00589	1.54241	1.81535	1.53565	1.91833	1.13727	1.78913	1.71329
Trim28	1.44197	1.71745	1.46442	1.94109	1.3625	1.79656	1.6611	2.4391	1.1968	2.19533	0.762591
Kif5a	1.11461	0.989958	1.46387	0.682323	1.07602	0.897057	0.840048	0.8693	0.16453	0.128563	0.146264
Jun	1.21865	1.24902	1.46122	2.67157	2.41991	2.2786	1.19318	0.898751	9.78949	5.07504	4.35774
Eny2	1.26409	1.41166	1.45873	1.37873	1.43342	1.47832	1.18548	1.34931	0.943337	1.91565	1.25364
Slc6a6	0.817353	0.69852	1.45801	0.686243	1.1644	1.0158	0.544555	0.847896	1.14636	0.206455	0.145624
Znhit1	1.19497	1.15833	1.45703	1.34433	1.05815	1.28036	1.43035	1.27208	0.548967	0.857136	0.507131
Prr7	1.07342	0.974007	1.45597	1.40249	1.35119	1.19365	1.47648	1.16442	0.134113	0.269729	0.396188
Srsf1	1.45612	1.61663	1.45514	1.76363	1.43327	1.42643	1.50207	1.75266	0.655406	1.39836	1.44037
Tmem63b	1.20304	1.12283	1.4519	0.919458	1.21888	0.963387	1.17738	1.14898	0.266082	0.424332	1.3529
Eif4e	1.75805	1.77268	1.45038	1.95628	1.64257	1.80561	1.65896	2.13354	0.975373	1.11024	1.00252
Atl1	0.823822	0.922741	1.45003	0.600868	0.75638	0.679324	0.797312	0.943172	0.128615	0.141538	0.23275
Tsnax	1.63038	1.77368	1.4494	1.29624	1.84835	1.93615	0.999531	1.86124	0.674929	0.866343	0.618394
Pam	1.02583	0.702634	1.44922	0.599348	1.09543	0.366126	0.234443	0.665824	0.132428	0.462022	0.261679
Chd4	1.35514	1.53765	1.44831	1.82276	1.84061	1.64704	0.831386	1.50136	1.4161	1.44529	1.59948
Hdgf	2.0844	1.96308	1.44775	2.22128	1.94116	2.24784	1.84956	2.07061	1.21261	1.85524	1.1393
Lamtor4	1.50667	1.28372	1.44774	1.35469	1.18915	1.27826	1.06499	1.05403	2.07101	1.46264	1.58745
Huwe1	1.09511	0.996437	1.44766	1.4467	1.26551	1.19049	0.922965	1.27744	0.600137	0.673462	0.798548
mt-Atp8	1.40078	1.0694	1.44645	0.951946	2.22603	1.94152	0.472775	0.651459	1.55582	0.539367	1.82923
Cacna1b	0.821069	0.649767	1.44637	0.436337	0.896862	0.627855	0.61521	0.489762	0.115482	0.0889155	0.14317
Ncan	1.34715	1.44923	1.44617	1.55624	1.50587	1.42892	2.55023	2.27303	0.164811	0.253033	5.75425
Apba2	0.973784	1.35906	1.44604	1.1476	0.85803	0.750428	0.996983	1.12365	0.126411	0.191487	0.93218
Vat1l	1.99431	1.04972	1.44402	1.01833	1.90871	1.22886	1.35129	1.1202	0.273188	0.147205	0.335545
Lin7c	1.27482	1.51479	1.44255	1.39112	1.32504	1.34904	1.86721	1.80665	0.53754	0.428122	0.726071
Srp19	1.42869	1.3144	1.4424	1.37068	1.34582	1.38285	1.25429	1.23148	0.865101	1.39545	1.1401
Ssbp3	1.92588	2.06362	1.44175	2.09023	2.25756	2.53873	1.73206	1.78672	0.597386	1.39592	0.492957
Lsm4	1.85426	1.72502	1.44164	1.96721	1.67578	1.71213	2.04263	1.83189	1.18824	1.90075	0.777598
Mtdh	1.21844	1.15823	1.44059	1.2508	1.40524	1.36618	0.981441	0.9377	3.38127	1.37628	2.49146
Yeats4	1.99906	2.22351	1.44027	2.17994	1.63354	2.18664	1.66183	2.218	0.991592	1.27722	0.680093
Samd10	1.31965	1.46905	1.43957	1.05462	0.846675	1.1194	1.52138	1.66369	0.100358	0.285296	0.0875375
Pld3	1.24839	0.962345	1.43947	1.16735	1.3323	0.843298	0.669768	0.819446	1.10647	0.800065	0.731609
Carmil3	0.486729	0.359238	1.43718	0.172828	0.904278	0.604408	0.109541	0.179181	0.113828	0.00434167	0.206513
Taldo1	1.41255	1.69722	1.43526	1.57504	1.59873	1.4278	2.43506	1.94628	2.98302	1.69975	1.50452
Ndufs8	1.22412	1.38037	1.43459	1.32034	1.3014	1.27589	1.17981	1.17588	1.28514	1.57125	1.81413
Myeov2	2.26585	2.55424	1.43043	4.15086	1.4641	2.33971	4.35594	2.89387	0.231271	2.37835	0.252433
Frmd4a	0.588466	0.843544	1.42971	0.7514	0.960754	0.785018	0.554749	0.695745	1.73833	0.631947	1.39642
B4gat1	0.844342	0.692329	1.42787	0.45533	1.07842	0.897344	0.395306	0.657127	0.523687	0.511195	1.69055
Ppp1r9a	1.6553	1.09405	1.42716	1.75589	1.37495	1.45992	0.881996	0.707657	0.928542	0.274176	0.796838
Mapk1	1.30702	1.26363	1.42542	1.42877	1.3141	1.28536	1.23595	1.25709	0.749369	0.833809	0.808524
Ppm1g	1.37748	1.50276	1.42519	1.59204	1.55869	1.63283	1.43423	1.77079	0.831512	0.857962	0.620657
Cops6	1.4335	1.74785	1.4226	1.44118	1.10438	1.18165	1.54104	1.89482	1.05798	2.14601	1.11269
Cacnb3	1.11048	2.15444	1.42112	1.40126	1.24629	1.57893	2.08018	2.48647	0.103432	0.710594	0.124454
Mdga2	0.770839	0.541642	1.41767	0.149156	1.01285	0.57959	0.651346	0.233083	0.121204	0.0559837	1.33961
Tm2d2	1.63195	1.68927	1.41578	1.66862	1.58733	1.66993	1.40571	1.72719	1.35616	1.48741	1.72747
Tpm3	1.9399	1.70791	1.41576	1.81222	1.5644	1.81863	2.59158	1.87537	4.73292	1.72504	1.15655
Rsrc2	1.51957	1.59616	1.41576	2.22715	1.70382	1.81677	1.74722	2.117	1.12782	1.27741	1.53013
Nrp2	0.347488	0.757982	1.41551	0.484781	1.60548	1.41646	0.190009	0.752488	0.419281	0.360666	0.100766
H13	1.37149	1.39811	1.41536	1.45414	1.47206	1.23396	1.33816	1.43047	0.650072	1.37466	1.1429
Abhd17a	1.21946	1.12441	1.41508	1.03288	1.15308	1.20051	0.920366	1.0304	1.16895	0.92256	0.935666
Pura	1.28799	0.838478	1.41261	0.801718	1.6218	0.924224	0.546645	0.702032	0.946693	0.385951	1.62132
Bptf	1.08664	1.03744	1.40863	1.37488	1.41115	1.27256	0.894336	1.11061	1.11971	0.946301	1.22922
Chmp2a	1.94954	1.78547	1.40803	2.20407	1.98023	1.86208	1.70749	1.65294	1.42075	1.72665	1.51871
Npepps	1.30489	1.31343	1.40634	1.26971	1.31191	1.15687	1.25383	1.53024	0.587755	0.657587	1.54755
Arl1	1.39962	1.44486	1.40528	1.24524	1.76639	1.51699	1.38849	1.46138	1.63171	2.13442	1.03898
Ndrg3	0.955271	0.835449	1.40281	0.855571	1.12417	1.04922	0.653428	0.786865	0.507836	0.393505	0.822913
Smap1	1.6609	1.5857	1.40272	1.49185	1.18482	1.53668	1.19191	1.2833	0.929987	1.36911	1.07216
Ip6k2	1.23877	1.33492	1.40119	1.65842	1.12887	1.33151	1.25258	1.98141	0.198083	0.764337	0.75606
Eif4h	1.68557	1.66286	1.40113	1.90984	1.83799	1.93548	1.73042	1.88271	1.64444	1.93529	1.20028
Gdpd1	0.983393	1.42011	1.4003	1.06563	1.26778	1.26081	1.03933	1.74917	0.175089	0.244061	0.30241
Csnk2b	1.55516	1.8565	1.40012	1.78368	1.66135	1.7221	1.79862	1.64206	1.19006	1.59915	1.31334
Lrfn5	0.541946	0.619701	1.39995	0.48503	0.936222	0.680828	0.25552	0.597538	0.0773289	0.0600743	0.0829803
Mrps17	1.69075	1.49572	1.39959	1.731	1.58105	1.70227	1.65653	1.50309	0.869202	1.34245	1.20045
Sobp	1.02721	0.943995	1.39903	0.834568	1.56346	1.02193	0.579693	1.07361	0.126177	0.437123	0.416925
Lsm1	1.32286	1.31237	1.39832	1.30559	1.17807	1.36124	1.2276	1.22748	0.621958	0.902587	0.762266
Eloc	1.34049	0.843574	1.39762	0.415748	1.66118	1.45071	0.270516	0.419099	1.50973	0.106466	1.30183
Mapre3	1.54016	1.24953	1.3973	1.78775	1.63568	1.60228	1.22585	1.31569	0.259355	0.223369	0.832045
Pdlim7	0.915849	0.867047	1.39724	1.28485	1.09274	1.14886	1.11349	1.15466	0.221559	1.32002	0.211801
Tra2a	1.10903	1.33534	1.39697	1.52554	1.11484	1.35142	1.25804	1.52759	0.867475	1.17317	2.58962
Ostc	1.68898	1.47171	1.3966	1.63211	1.64001	1.28208	1.87252	1.401	1.79012	3.67724	1.79017
Deaf1	1.4176	1.42967	1.39601	1.51714	1.32323	1.7561	1.61806	1.64421	0.286632	0.736803	0.385175
Ttc14	0.690039	0.727884	1.395	0.716761	0.997584	0.913278	0.694685	0.953296	0.546973	0.753567	2.03619
Brd3	1.5066	1.62213	1.39302	1.85338	1.53848	1.79963	1.64008	2.08993	0.554305	1.07675	0.599858
Ube2l3	1.72157	1.68368	1.39249	1.51098	1.49989	1.51314	1.65639	1.57387	1.74933	1.54268	1.47652
Dcaf7	1.17686	0.944767	1.39181	1.19507	1.40868	1.1568	0.663998	1.00223	0.4975	0.447221	0.497482
Ppa1	1.27447	1.39817	1.38877	0.974722	1.42609	1.17848	1.43791	1.31492	0.410764	0.753525	0.926341
Cript	1.64676	1.92842	1.38771	1.5294	1.26873	1.53192	1.77285	2.12989	0.809654	1.0792	0.726894
Miat	0.662024	0.77337	1.3862	0.853057	1.0917	0.826073	0.543363	1.0137	0.0966072	0.241748	0.190114
Top2b	1.09976	1.28536	1.38588	1.32977	1.4491	1.56431	1.22052	1.78056	0.668138	0.861826	1.06973
Fam92a	1.34818	1.13903	1.38587	1.03177	1.33991	1.40936	0.840304	0.946472	0.404535	1.07723	0.876794
Psmc6	1.3102	1.42015	1.38464	1.2041	1.28917	1.39071	1.11308	1.3648	0.990269	1.05029	1.16382
Shfm1	2.42677	2.59453	1.38375	4.60015	1.74895	2.30862	3.85085	2.69818	0.653051	5.79051	0.459473
St8sia2	0.723019	0.85828	1.38349	0.745553	0.694486	0.855122	0.981067	1.06952	0.0684516	0.349527	0.0906448
Gm10076	2.18437	2.00627	1.3831	3.35945	1.88915	2.39237	2.83382	1.66611	1.50208	3.23614	0.577535
Ap2a2	1.05072	1.08828	1.38294	0.955948	1.07658	1.00058	1.04045	1.05563	0.670915	0.806746	0.463746
Atf4	1.55752	1.38524	1.38194	1.64205	1.50315	1.41845	1.26863	1.48377	1.64305	1.69339	1.29234
Polr2j	1.93125	1.83944	1.38165	2.33092	1.81755	2.21322	2.09451	1.85077	0.961868	1.38702	1.16728
Dynlt1a	1.30254	1.16279	1.3809	1.07444	1.32249	1.3152	1.49855	0.967203	0.209097	0.345013	0.128978
Psenen	1.98906	1.85643	1.38012	1.97552	1.77645	1.57576	1.95195	1.56204	2.02027	1.56786	1.54338
Acin1	1.34216	1.32629	1.37957	1.73724	1.64944	1.63496	1.34452	1.72706	1.18722	1.13076	1.18721
Cox14	1.63609	1.5513	1.3793	1.93874	1.38835	1.36151	1.53466	1.55648	1.1536	1.4606	1.36928
Arfgef3	0.63421	0.489123	1.37862	0.357266	0.964894	0.623545	0.220629	0.413795	0.151031	0.0511499	0.121242
Dzip3	1.11794	0.900218	1.37769	1.22349	1.39024	1.37931	0.790861	0.741123	0.295137	0.43659	0.636344
Camk1	1.16129	1.13449	1.37762	1.58702	1.31418	1.20244	1.2752	1.18202	3.66109	0.592494	0.627722
Tle4	2.03962	0.817564	1.3759	0.983294	0.869097	0.738546	0.383585	1.15155	0.631775	0.172405	0.846511
Clasp2	0.999577	0.765257	1.37575	0.723299	1.11077	0.89815	0.545113	0.660926	0.558514	0.123357	1.49601
Trir	1.5128	1.02248	1.37525	0.516839	2.22245	1.75516	0.192357	0.387839	1.6793	0.135839	1.33082
Ttc19	0.572475	0.543596	1.37364	0.576294	0.861555	0.640136	0.483968	0.603636	0.294971	0.328827	1.24605
Mapk10	0.885204	0.907931	1.37316	0.814945	0.790562	0.776222	0.661603	0.94077	0.116655	0.0705443	0.552075
Fam216a	1.52174	1.46837	1.37283	2.04987	1.83665	1.79319	1.3064	1.5468	0.280287	0.53819	0.651015
Ccdc124	1.12982	1.41936	1.37153	1.17305	1.00676	1.17957	1.54137	1.73449	0.677052	1.11041	0.849245
Fbxo9	0.813123	0.780314	1.37139	0.521211	0.976556	0.869585	0.619112	0.783578	0.364759	0.330872	0.541029
Eif5b	1.2644	1.39534	1.37129	1.47939	1.34852	1.50264	1.26411	1.4904	1.20172	1.90655	0.743172
Sh3glb1	1.63224	1.49139	1.37066	1.25311	1.31401	1.04776	1.9197	1.33513	4.45039	1.46067	1.30903
Rtf1	1.46155	1.64964	1.37003	1.92115	1.42725	2.02139	1.60647	2.07842	0.833078	1.18239	0.60516
Tmem59l	0.88993	0.749153	1.36916	0.698079	1.30351	1.01067	0.472234	0.804356	0.140685	0.0478409	0.150509
Chchd1	1.97959	1.82031	1.36858	1.8883	1.87309	1.96098	2.17589	1.68371	0.972983	1.18302	1.17969
Csrnp3	1.11306	1.0569	1.36789	0.968797	1.12887	1.41713	0.853987	1.10055	0.143442	0.205066	0.161077
Tmem179	1.16646	0.791752	1.36765	0.855005	1.13	1.10929	0.711605	0.722351	0.129626	0.0589721	0.118551
Actr1a	1.23227	1.48613	1.36686	1.21075	1.10145	1.2215	1.67039	1.71158	0.550379	0.732832	0.713259
Igfbp5	1.06764	0.685789	1.36488	0.373137	0.464138	0.46502	0.197515	0.268646	0.176886	0.910488	0.408025
Ppig	1.45708	1.44855	1.36475	1.49231	1.70744	1.54916	1.08138	1.35315	1.11087	1.56695	0.68317
Tm2d1	1.46081	1.42389	1.36473	1.40831	1.3788	1.44653	1.30624	1.26776	0.741995	1.01281	1.08859
Cdkn2d	1.3921	1.39124	1.36449	1.11556	1.11011	1.03047	1.53994	0.951996	0.464435	0.503829	0.545705
Smim7	1.45549	1.49836	1.3628	1.34678	1.39686	1.3168	1.6157	1.50614	0.907203	1.30207	0.98846
Ppp1r1a	2.37261	1.67158	1.36198	1.85762	1.44342	1.81495	2.70989	0.999763	0.269549	3.47809	0.799848
Kif5b	1.62295	1.61685	1.3612	2.05052	1.78338	1.62424	1.42855	1.54688	1.81601	1.50471	1.31509
Msi2	0.797068	1.33982	1.3606	0.803899	1.67406	1.04488	0.646975	0.834215	0.424163	0.715357	2.6429
Ctsd	0.838117	0.961652	1.36012	0.761722	1.02014	0.859021	0.590225	0.929521	29.6609	1.85362	5.49392
Spin1	1.3201	1.2225	1.36	1.48938	1.37275	1.60622	1.55173	1.63907	0.423144	0.879412	0.492493
Ache	0.643627	0.500896	1.35969	0.247903	0.680659	0.499703	0.231427	0.388853	0.132756	0.0195988	0.13268
Map9	1.16528	1.07261	1.35949	1.27705	1.39232	1.58025	1.05187	1.1141	0.129372	0.141002	0.255807
Eid2	1.40207	1.11012	1.35909	0.752962	1.52413	1.44971	0.624478	0.823647	0.362096	0.374007	0.599081
Psmc4	1.34622	1.57718	1.35895	1.66412	1.49869	1.53314	1.72293	1.67206	1.00148	1.31368	1.46557
Mmd	0.995622	1.49138	1.35847	1.0856	0.578494	0.77088	1.88252	1.93037	0.269103	1.23639	0.426426
Cxx1a	1.87512	2.59706	1.35794	4.0575	1.44911	2.47205	3.68631	3.1589	0.0917947	1.51935	0.125846
Pgk1	0.977607	0.691928	1.35647	0.47729	1.30588	0.833735	0.417103	0.481358	1.53204	0.264052	2.89765
Adprh	1.2915	1.54566	1.35641	1.37392	1.44915	1.32282	1.47158	1.50005	1.10686	1.63041	1.33688
Txndc17	2.49952	2.29068	1.35397	1.98658	1.91764	1.87872	2.73336	1.41868	1.45169	2.52491	0.78476
Aurkaip1	1.67545	1.59637	1.34653	1.72034	1.5069	1.62158	1.36507	1.51512	1.07044	1.52688	1.25776
Tmx1	1.13958	1.233	1.34649	1.14931	1.18518	1.1156	1.02946	0.969639	0.555438	0.604575	1.11488
Nav2	0.780016	0.553847	1.34647	0.274202	1.3582	0.509246	0.539858	0.468333	0.621153	0.155679	0.842552
Baiap3	0.950458	0.452876	1.34569	0.963133	1.0042	0.569446	0.221161	0.319632	0.182331	0.0342537	0.202104
Rwdd1	1.7795	1.58121	1.34499	1.45627	1.44849	1.45123	1.84753	1.44857	0.860658	1.93417	0.974385
Gabrg2	0.648665	0.645891	1.3438	0.461007	0.819337	0.678965	0.752525	0.686879	0.0616012	0.0449643	0.076646
Inpp4a	1.1528	0.950106	1.34347	1.21588	1.31816	1.21449	1.08717	0.94353	0.297923	0.209103	0.360597
Spop	1.44125	1.40885	1.34232	1.32384	1.60297	1.45404	1.02947	1.44218	1.00295	1.03773	0.550218
Srsf10	1.16645	1.15618	1.34061	1.43785	1.52801	1.43803	1.19352	1.40505	0.900658	0.945319	1.17237
Apc	1.23494	1.08678	1.34052	1.07984	1.16968	1.24615	1.05125	1.27158	0.516979	0.390745	1.60558
Ssu72	1.69859	1.84019	1.3395	1.58921	1.31919	1.40183	1.56097	1.49542	1.28483	1.45923	1.08667
Rbmxl1	1.32375	1.49797	1.33909	1.49782	1.57964	1.93201	1.357	1.86095	1.08227	1.15508	1.11623
Psmc2	1.52232	1.64387	1.33905	1.33237	1.61542	1.53956	1.13983	1.51591	1.33574	1.17643	1.18877
Rnf5	2.13242	2.35582	1.33836	2.21119	1.58591	2.00343	2.35778	2.56745	0.743315	0.912122	0.975614
Cisd2	1.1155	1.14068	1.33819	1.37969	1.17156	1.06176	0.923423	1.20228	0.840434	0.933227	1.04839
Mrpl34	2.1858	2.56284	1.33797	2.25956	1.84355	2.22237	2.16866	2.17152	0.800639	1.10099	0.962813
Arl4a	1.51007	1.27299	1.33438	1.41238	1.90423	1.40798	1.11243	1.36243	0.433115	4.77986	0.533931
Raly	2.18463	2.36283	1.33179	2.19734	1.42424	1.76456	3.26911	2.48878	2.578	6.65073	1.20413
Trappc3	1.01571	1.20149	1.32974	1.01135	1.15007	1.3506	1.27053	1.51368	0.937758	0.730742	0.909927
Fam32a	1.75959	1.70731	1.32958	1.77907	1.56132	1.70361	1.87011	1.80726	1.04217	1.29708	0.690713
Cyfip2	1.11475	1.01102	1.32897	0.790036	0.945495	1.07779	0.791649	0.951974	0.178573	0.31369	0.313048
1110065P20Rik	1.71593	1.35636	1.32885	1.41072	1.24347	1.16149	1.21217	1.0402	0.498673	1.18125	0.998745
Rnps1	1.74174	1.788	1.32792	1.68423	1.35483	1.51938	1.67734	1.93709	0.587309	1.12393	0.592307
Pdrg1	1.02313	1.17784	1.32656	1.21322	1.01834	1.32682	1.41524	1.38219	0.65096	0.927621	0.561157
Scrn1	1.27449	1.20304	1.32617	1.31044	1.11709	1.06904	1.23614	0.686656	0.184702	0.261805	0.548353
Bola2	1.63389	1.5873	1.3257	1.54527	1.31825	1.64408	1.37206	1.13736	1.03255	1.34638	0.780542
Smarce1	1.51436	2.11382	1.32514	2.12667	1.33991	1.852	1.98577	3.13763	0.714709	1.62804	0.353472
Atxn2l	0.84076	0.767911	1.32502	0.867276	1.10248	0.88582	0.552772	0.828358	0.779045	0.495859	0.902622
Celf3	1.57434	1.81777	1.32486	2.76737	1.84409	1.77464	1.86806	2.01509	0.125586	0.285439	0.130076
Pianp	1.01588	0.728249	1.32379	0.904064	1.05983	0.95228	0.582091	0.76157	0.150844	0.247154	0.141824
Copg1	1.08665	1.01704	1.3233	0.847314	1.06955	1.08863	0.926372	0.902331	0.438152	0.928228	0.612686
Selenoh	0.97319	0.699406	1.32278	0.266257	1.40263	1.11808	0.175441	0.301668	1.38765	0.0883695	0.524686
Rp9	1.53241	1.218	1.32195	1.37912	1.53569	1.51398	1.1766	1.0159	0.922501	0.952802	0.681511
Mrps21	1.91798	1.96526	1.32141	2.03814	1.79429	1.84304	1.98473	1.70554	1.33583	2.13842	1.38768
Zfp207	1.25992	1.35255	1.32111	1.63323	1.40099	1.66934	1.42516	1.79958	0.875623	1.34488	1.24983
Timm9	1.26525	0.988669	1.31907	0.867654	1.12747	1.20588	0.752495	0.841913	0.374106	0.355351	0.845751
Chn1	1.35936	1.56603	1.31892	1.04255	1.04665	1.15286	1.24147	1.96134	0.186216	0.36047	0.770208
Scn9a	0.921687	0.751383	1.31758	0.703226	0.971047	0.64603	1.00161	0.362952	0.0690763	0.0809659	0.0729923
C1qbp	1.81745	1.64158	1.3174	1.57104	1.70682	1.65704	1.59996	1.50866	1.44756	1.26363	1.20284
Napa	1.40678	1.39942	1.31695	1.34746	1.26353	1.47135	1.46411	1.35989	1.17809	1.54113	1.10815
Ddx3x	1.20173	1.19516	1.31602	1.48996	1.25164	1.3256	1.10207	1.25613	1.79962	1.70558	1.35958
Ubxn4	1.40245	1.35777	1.31572	1.48954	1.59302	1.3948	1.4123	1.41556	0.82222	1.13564	1.05083
Trio	0.706868	0.626547	1.31382	0.600068	0.965997	0.823612	0.609367	0.473017	0.622013	0.57979	0.84297
Cope	1.107	1.39967	1.31037	1.4052	1.19304	1.24138	1.26683	1.47467	1.40276	2.00713	1.52757
Nrsn2	1.78481	1.08104	1.30914	1.99691	1.83839	1.93769	1.03739	0.893951	0.180005	0.12814	0.207717
Runx1t1	1.41059	2.06378	1.30652	0.88741	0.775817	1.09115	0.532829	2.65684	0.125825	1.03268	0.256629
Tmem167	1.44368	1.50299	1.30581	1.26575	0.83029	1.15396	1.30687	1.29753	1.23528	3.75603	1.34418
Mtch2	1.48122	1.75884	1.30517	1.4861	1.14234	1.05552	2.3927	1.69731	0.851844	1.57845	2.11986
Dctn1	1.21222	1.10894	1.30505	1.01694	1.27246	0.952862	0.993696	0.952601	0.559208	0.619235	0.511286
Fam155a	0.823892	0.665463	1.30431	0.601005	1.54471	0.791662	1.33261	0.753074	0.107721	0.105233	0.199082
Tmem145	0.558407	0.54409	1.30423	0.43753	0.764037	0.63017	0.486612	0.554825	0.085665	0.093639	0.107644
Hnrnpf	1.59671	1.57606	1.3038	1.93351	1.619	1.57397	1.77426	1.78188	5.17413	3.9176	2.03631
Fam220a	1.09254	1.28261	1.30369	1.11535	1.00805	1.24349	1.15881	1.4029	0.42033	0.70074	0.602799
Cyp51	1.32259	1.38102	1.30337	1.02074	1.2498	1.10366	1.01888	1.14872	0.305539	0.589763	1.67432
Ubn2	0.932916	1.00689	1.30297	1.34429	1.23107	1.09955	0.729231	1.00165	0.619582	0.567361	1.25682
Coprs	1.25631	1.2061	1.30288	1.15918	1.11113	1.05305	1.03022	1.34248	0.351357	0.421685	0.450975
Nol7	1.51106	1.32933	1.30267	1.28813	1.50406	1.54768	1.21636	1.2563	1.23515	1.09239	1.02157
Lmx1a	0.0152002	0.0573333	1.3022	0.0263627	0.0137862	0.00841638	0.0210015	2.1742	0.0146001	0.0491337	0.0216575
Rell2	0.595789	0.518755	1.30071	0.220224	0.300804	0.496652	0.669212	0.511688	0.102369	0.0577804	0.0674464
Prpf19	1.20824	1.41762	1.30034	1.50225	1.15271	1.36914	1.30899	1.47554	0.739575	1.46161	1.05865
Adgrb3	0.542531	0.662995	1.30027	0.570961	1.06473	1.17212	0.686894	0.859381	0.093088	0.0698566	1.45307
Tnrc6b	0.663684	0.611278	1.29984	0.725449	0.934798	0.688389	0.354119	0.589798	0.62986	0.505576	1.71386
Fut9	0.230354	0.343736	1.29698	0.279185	0.52615	0.281406	0.142385	0.271166	0.112929	0.0131864	3.10984
Syt13	0.636851	0.93223	1.29683	0.361325	0.567907	0.49582	0.248346	0.709684	0.0660704	0.0922487	0.0625281
Mcts1	1.40168	1.4401	1.29676	1.50576	1.31246	1.6587	1.47156	1.56972	0.926896	0.782678	0.685262
Eif4g3	1.07105	1.02815	1.296	1.07341	1.23004	1.13519	0.664036	1.0396	0.740142	0.586662	1.27778
Hbb-y	4.62824	7.90771	1.29441	2.20543	0.509348	0.960237	1.84426	6.09429	1.53457	9.33794	0.0787381
Cnpy2	1.574	1.44306	1.29289	1.84261	1.7082	1.7521	1.29882	1.38885	1.33914	3.12848	1.42728
Map7d1	1.12795	1.26457	1.29188	1.1076	1.09124	1.16108	1.20314	1.46572	0.915707	0.966126	1.25103
Ivns1abp	1.01452	1.13412	1.29115	1.07596	0.780457	0.952486	1.09392	1.61192	2.12451	0.566146	0.44134
Idh3b	1.11081	1.14748	1.28942	1.13482	1.10394	1.16389	1.16475	1.2403	0.793582	1.28057	1.31542
Polr2k	1.89994	1.80643	1.28892	2.27337	1.94199	2.10488	1.85226	1.81682	0.85909	1.33379	1.00749
Hdac11	0.876104	0.620554	1.28799	0.74565	1.19741	0.919776	0.678888	0.674698	0.274767	0.256189	0.338785
Ddx17	1.0196	1.06798	1.28674	1.34013	1.33688	1.21797	0.989088	1.1884	0.645037	1.2387	2.11246
Phf5a	1.36622	1.4965	1.28628	1.50404	1.35747	1.63655	1.32932	1.61321	1.04155	1.48892	0.947338
Kctd13	1.31672	1.2017	1.28471	1.02408	1.08511	1.17257	1.5185	1.5168	0.266172	0.314471	0.17031
Mrps26	1.37128	1.305	1.28425	1.26117	1.29043	1.29664	1.1238	1.25475	0.675099	0.9575	0.9637
Stau2	0.829483	0.892231	1.2834	0.571181	0.825026	0.90573	0.951271	1.1181	0.228213	0.231862	0.332635
Igsf8	0.343887	0.284013	1.28202	0.195555	0.48577	0.293699	0.357667	0.803067	0.459972	0.472418	0.730288
Sdhd	1.40187	1.33544	1.28093	1.15615	1.30069	1.29485	1.18276	1.1668	1.31098	1.56905	1.41225
Tenm2	0.767843	0.738883	1.2791	0.374674	0.795138	0.70749	0.210842	0.487586	0.0816817	0.0659586	0.0755722
Nell2	1.59817	0.952114	1.27794	0.437691	0.989003	0.808991	5.01072	1.67239	0.0870492	0.183458	0.108907
Sep15	1.75275	1.86779	1.27661	2.40108	0.939729	1.08675	2.89875	2.4648	0.42341	4.24751	0.529389
Trp53bp1	1.04897	0.949338	1.2756	1.21823	1.32592	1.29909	0.843859	0.946449	0.287752	0.316322	0.435413
Tial1	0.819244	0.742489	1.27511	1.02878	1.13596	0.892869	0.544174	0.715938	0.881029	0.604735	1.04431
Eif3c	1.36829	1.46003	1.27466	1.3705	1.48029	1.362	1.3408	1.63395	1.18072	1.49398	0.978999
Emc4	1.10569	1.13416	1.27405	0.987604	1.0873	1.09723	0.974226	0.94205	0.507217	0.72742	0.871476
Nckap1	1.00887	0.872488	1.27389	0.768473	1.00242	0.789944	0.763075	0.717955	0.238672	0.627238	1.33472
Ubl3	0.857082	0.727089	1.27339	0.721024	0.740779	0.549447	0.628608	0.522826	1.76805	0.705412	1.35783
Klhl7	0.893947	0.887495	1.27266	0.9778	1.2122	1.10307	0.651886	1.21055	0.358335	0.376908	0.467472
Got2	1.20205	1.3399	1.27252	0.988973	0.966508	0.948108	1.09998	1.16372	0.486156	1.12357	0.281816
Phf14	0.740525	0.897994	1.27179	0.856881	0.973841	1.12911	0.631878	1.03988	0.896981	0.720584	1.05957
Ogt	0.97761	1.10491	1.27135	1.1814	1.09617	0.858444	1.59278	1.44263	0.519465	0.721129	2.28056
BC005537	1.11897	1.16372	1.27101	1.26953	1.04432	0.972588	1.36109	1.39132	0.964203	0.832247	0.95882
Mrpl43	1.31369	1.31784	1.27014	1.37766	1.14339	1.3993	1.21137	1.35584	1.0579	0.925314	1.09353
Hnrnpl	1.22129	1.16051	1.26998	1.36599	1.30715	1.24721	1.08448	1.33578	1.40813	1.05774	1.67076
Ktn1	0.912245	0.913884	1.2692	0.894183	1.37341	0.989737	0.8244	0.82476	0.569788	0.625014	1.58629
Tomm40	1.18012	1.08894	1.2683	0.981508	1.01725	1.09502	0.860818	1.05052	0.708342	1.04936	1.13668
Ift20	1.39848	1.36635	1.26773	1.30492	1.20585	1.54688	1.12066	1.32623	0.84109	1.42964	0.865216
Sppl3	1.16827	1.05484	1.26752	1.05114	1.17386	1.19866	0.933657	1.16174	0.836587	0.79254	0.886932
Bod1	1.4782	1.41945	1.26745	1.4596	1.63244	1.6419	1.23502	1.31995	0.383457	0.611901	0.717822
Psmd13	1.265	1.45579	1.26701	1.35181	1.55687	1.49616	1.31855	1.33084	1.02881	1.06545	1.38603
Sarnp	1.50232	1.45605	1.2661	1.79065	1.56582	1.69376	1.42541	1.47119	1.0029	1.40477	0.861291
Ptp4a2	1.55445	1.3996	1.2652	1.34835	1.31335	1.24908	1.50218	1.43343	2.4396	1.16964	1.01315
Actr10	1.13155	1.36744	1.26466	1.11136	1.40731	1.21775	1.10019	1.43613	0.83665	0.951678	1.23599
Krit1	0.869875	0.947805	1.26442	1.13239	0.85696	0.926784	1.03997	1.27907	0.510766	0.807618	1.48924
Polr2i	1.4994	1.5638	1.26408	1.82502	1.57286	1.70045	1.90393	1.58874	0.754288	1.29	1.08264
Sfr1	1.79436	1.6689	1.26315	1.7761	1.63996	1.54383	1.5322	1.24827	1.47626	2.71766	1.18466
Polb	0.956476	1.15331	1.2622	1.0358	1.10833	1.13945	1.06203	1.39706	0.501175	0.404479	0.503878
Ankrd11	1.36588	1.3146	1.26178	1.30404	1.25861	1.31156	1.22556	1.52773	1.4545	1.09431	1.23008
Mkln1	0.594084	0.627827	1.26149	0.721568	0.832341	0.744714	0.567607	0.723858	0.882921	0.520641	1.17993
Glyr1	1.0477	1.14778	1.26112	1.08516	1.05081	1.07618	0.861982	1.33435	0.890857	0.820326	0.770924
4930402H24Rik	0.960501	1.00543	1.26085	1.06647	1.02252	1.03718	0.88303	1.12452	0.180112	0.540571	2.36971
Smarcb1	1.60792	1.90251	1.26054	1.87028	1.56434	1.75691	2.67972	1.99645	0.726685	1.6652	1.51206
Fyn	1.19059	1.12228	1.2603	0.912875	1.20472	1.21881	0.969992	1.20032	0.470692	0.5609	1.05977
Psmd6	1.20281	1.57649	1.25957	1.12529	1.24297	1.17975	1.23143	1.58103	1.03689	1.20156	1.23619
Sdf2	1.29267	1.13761	1.25947	1.33091	1.70127	1.41151	1.11793	0.911069	0.883414	1.60767	2.65339
Nudt21	1.30652	1.4146	1.25937	1.23101	0.873836	1.14104	1.56373	1.56411	0.912171	1.96422	0.812326
Med28	1.62224	1.76445	1.25929	2.04337	1.37051	1.42932	2.32201	1.86184	1.03762	1.53131	0.726304
Capns1	1.92891	1.78969	1.25905	1.69694	1.26898	1.43072	1.75197	1.29658	1.69804	3.09484	1.17436
Ssbp2	1.8394	1.23549	1.25843	2.78117	1.03558	1.68737	1.89016	2.19513	0.531448	1.25662	1.64802
Sec11a	1.49553	1.50451	1.25777	1.81667	2.13372	1.95151	1.30142	1.33948	1.17488	2.66762	1.81007
Fsd1	0.973607	0.966743	1.25697	0.706534	1.0111	0.906289	1.0588	0.884982	0.100477	0.186334	0.150625
Clip3	1.13524	1.18262	1.25663	1.14146	1.06161	1.05176	0.940217	1.41738	0.196234	0.858068	0.536984
Rhoa	1.81646	1.73402	1.2552	1.6532	2.14121	1.67832	1.10022	1.34736	6.4105	3.48699	2.91231
Pfdn6	1.76608	1.71309	1.2537	1.66677	1.58751	1.80646	1.56161	1.50582	0.655142	1.18167	0.855393
Foxa1	0.0238386	0.0857319	1.2534	0.0387649	0.0302169	0.0289129	0.0340986	6.56805	0.0179222	0.114055	0.0275314
Ebf1	0.249998	4.99826	1.25296	0.0896492	0.0695459	0.0644998	0.0349921	0.598194	0.2158	1.31163	0.0147828
Lsm6	1.42041	1.44936	1.25283	1.36926	1.27223	1.43236	1.53495	1.55166	1.53371	1.28159	3.18549
Camk2g	0.962422	0.81798	1.24748	1.00599	0.946812	0.977561	0.970045	0.842596	0.422386	0.35982	5.21893
Atp6v1h	0.817603	0.969738	1.2462	0.979493	0.835582	0.877266	0.647449	1.05902	0.519368	0.41248	0.652003
Tceal3	1.87344	1.13617	1.2462	1.89004	1.71595	1.68592	1.29652	0.783419	0.205342	0.126848	0.376116
Ubxn6	1.35009	1.40878	1.24571	1.32131	1.32152	1.1735	1.47866	1.55577	0.639501	0.881487	0.716652
Nucks1	1.26519	1.41825	1.24563	1.07749	1.09297	1.07467	1.25188	1.54882	1.16494	1.45438	0.796858
Atraid	1.44332	1.16087	1.24446	1.38434	1.50286	1.40645	0.905018	1.01984	1.83063	1.55039	3.20278
Astn1	0.740208	0.704075	1.24411	0.639495	1.18479	0.888167	0.674944	0.617043	0.122257	0.0847359	2.16324
Trim32	0.822492	1.03336	1.24385	0.727797	0.918681	1.05933	0.88231	1.33617	0.211146	0.394314	0.34288
Ddah1	0.833665	0.611385	1.24364	0.254925	0.506394	0.471455	0.981441	2.22383	0.184206	0.169569	1.96178
Cbr1	1.09891	1.44188	1.2432	1.43129	1.32844	1.37753	0.933448	1.56907	0.575883	0.692337	0.838246
Ndufv1	1.03035	1.19464	1.24315	1.08875	1.24832	1.23982	0.941752	1.28804	0.855717	1.14562	1.62323
Pcdh10	0.649617	0.753907	1.24269	0.510019	2.11216	1.47844	0.293436	0.574412	0.151665	0.302349	3.50442
Atox1	1.95642	1.97416	1.24121	1.55466	1.32939	1.50221	1.97114	1.64384	3.91378	3.04036	1.88765
Zfp580	1.14494	1.33053	1.23968	1.16315	0.99666	1.24957	1.17383	1.30567	0.283586	0.788911	0.510705
Hypk	1.74858	1.53304	1.23947	2.01282	1.70118	1.81599	1.49202	1.20805	0.700979	1.22887	0.665498
Txndc15	0.952351	1.09822	1.23922	1.04582	1.15035	0.950042	1.01799	1.14602	1.05053	1.22003	1.955
Ncs1	1.0827	1.3217	1.23807	1.18067	0.889505	1.23048	1.93742	1.77687	0.269302	0.514817	0.311259
Rap1b	1.27929	1.60037	1.23756	1.3671	1.08858	1.02089	1.58671	1.12061	5.22861	1.80468	1.10041
Cdh2	1.70732	1.57436	1.23728	1.73703	1.24848	1.47088	1.46518	2.01375	0.162036	0.322158	1.58643
Ubxn1	1.96606	1.89688	1.2371	2.2422	1.96395	1.97201	1.78781	1.55686	2.16247	1.6597	1.24301
Ube2r2	1.79879	1.69187	1.23689	1.62555	1.75755	1.60889	1.23748	1.36321	1.21109	1.65024	1.1434
Pnmal1	1.08039	0.790824	1.23684	1.07434	2.09996	1.39184	0.733012	0.611447	0.185112	0.0672691	0.20301
Junb	1.41683	1.14069	1.23642	1.13974	1.52651	0.963558	0.331385	0.398257	13.6936	2.10874	2.16597
Gm16286	1.74168	1.66747	1.2359	1.54191	1.66486	1.59862	1.57855	1.65683	1.35264	1.0541	0.839912
Smarca4	1.24604	1.65786	1.23584	1.31674	1.17224	1.38686	1.27606	2.09174	0.687371	1.20762	0.582124
Tmem14c	1.39451	1.3407	1.23453	1.34935	1.24279	1.18647	1.34062	1.06213	2.21311	1.855	1.83495
Commd3	1.13024	1.28368	1.23452	1.35081	1.55406	1.76644	0.99181	1.74896	1.09269	1.13628	1.11556
Rpn2	1.0629	1.03446	1.23399	0.893844	0.998997	0.867863	1.04516	1.1827	2.14211	2.19587	2.85959
Psmd11	1.23889	1.2579	1.23367	1.20968	1.19432	1.2178	1.3747	1.53399	0.851644	1.06034	1.42988
Kdelr1	1.13436	1.20419	1.23328	1.03708	1.32491	1.15464	1.1764	1.13993	1.56369	3.32498	2.0114
Rasgrp2	0.443201	0.360523	1.23216	0.121159	0.364289	0.271127	0.269896	0.243378	0.128474	0.128384	0.441129
Rpn1	0.725384	0.733036	1.23121	0.651052	0.87667	0.641403	0.553316	0.68657	0.727558	0.828943	1.81747
Hnrnph3	1.26047	1.56052	1.2301	1.77194	1.53045	1.68893	1.26473	2.06674	0.385795	1.07354	0.578937
Gpr85	0.697062	0.973021	1.22956	0.780441	0.793569	0.871272	0.952633	1.52456	0.052333	0.113101	0.287137
March1	0.38833	0.429171	1.22953	0.433903	0.590695	0.735738	0.652386	0.931572	0.592843	0.0162468	0.0790965
Cacna2d2	0.751147	0.438789	1.22844	0.634126	0.627733	0.675657	0.46678	0.291016	0.0769208	0.0829515	0.384884
Ids	0.674835	0.683879	1.22806	0.490552	0.783258	0.667123	0.606076	0.684014	0.454463	0.226704	0.274412
Pdhb	0.981546	1.05331	1.22784	0.908838	1.22402	1.1561	0.789248	0.892473	0.636683	0.556656	1.35661
Gdap1l1	1.28458	1.38816	1.22696	1.53945	1.12255	1.42679	1.47205	1.70039	0.110398	0.186753	0.243257
Syt5	1.11391	0.906995	1.22656	1.09399	1.10201	1.61357	1.00357	1.25825	0.0930326	0.0623994	0.0918965
Timm17a	1.41044	1.09767	1.22496	1.14535	1.21821	1.11578	1.0138	0.833313	0.678474	1.13689	1.28359
Rnf208	0.976528	1.03989	1.22415	0.824921	0.986379	0.997352	1.01606	1.03975	0.124986	0.0909958	0.129806
Clk1	0.74676	0.692141	1.22358	1.09448	1.06047	1.01022	0.702652	0.893532	1.6022	1.09705	1.70656
Ppp1r11	1.59544	1.53736	1.22262	1.60778	1.35238	1.48872	1.30201	1.5098	0.703337	0.933769	0.792627
Edil3	0.473928	0.832231	1.22213	0.193648	1.56934	0.463292	0.503279	0.867831	0.116122	0.153791	0.0977007
Sod1	1.10943	0.881809	1.22208	1.11871	0.923922	0.982762	1.03127	0.936401	0.578192	0.804204	0.721666
Txn2	1.69677	1.6362	1.22199	1.56913	1.43876	1.4767	1.89274	1.60327	1.02701	2.06045	1.22757
Tmem178b	0.57239	0.564702	1.2217	0.378336	0.989449	0.576127	0.365495	0.516905	0.0977097	0.0915517	0.344337
Slc4a3	0.487168	0.435583	1.22153	0.37316	0.724888	0.553351	0.282491	0.441274	0.117259	0.166963	0.514254
Tpgs2	1.16885	1.38082	1.2204	1.28867	0.930042	1.0986	1.65291	1.38094	0.300706	0.734452	0.867991
Mbd3	1.8255	1.80546	1.2201	2.21101	1.57893	1.71033	1.94695	1.86729	1.48891	2.00567	1.09043
Cit	0.404927	0.261523	1.21907	0.328939	0.520444	0.258289	0.161014	0.273669	0.250053	0.0469698	1.27021
Nsd3	0.651497	0.452389	1.21871	0.248184	1.09455	0.797374	0.07712	0.166992	0.651271	0.0583224	0.767556
Psmd2	1.19435	1.34013	1.21827	1.08198	1.30963	1.19401	1.11982	1.54337	1.04783	1.31674	1.12921
Lingo2	0.173753	0.297759	1.21789	0.299992	0.356462	0.3956	0.376697	1.01908	0.023252	0.023826	0.0229569
Elmo1	0.416699	0.801925	1.21763	0.376826	0.388011	0.306636	0.415396	1.19672	1.39724	0.109398	0.242064
Syt16	0.855934	0.708149	1.21745	0.580134	0.84318	0.97906	0.869271	1.01913	0.0812924	0.0596313	0.0836747
Hdac3	1.08365	1.07056	1.21717	1.00246	1.04496	1.02887	0.982754	1.15847	0.586224	0.871334	0.783082
Tmem57	0.861251	1.08981	1.21709	1.05492	1.01705	1.2907	0.842087	1.40737	0.380684	0.56396	0.436448
Mrpl42	1.46705	1.4004	1.21706	1.40087	1.23144	1.25687	1.77147	1.3906	0.843965	1.68897	1.24483
Dnm3	0.614758	0.602224	1.2164	0.396826	1.02043	0.870742	0.353575	0.430746	0.130567	0.103142	0.20356
Ppp1r2	1.50141	1.6528	1.21629	1.49025	1.39883	1.55202	1.25772	1.30993	1.03534	1.67927	1.10785
Spag9	1.24098	1.21153	1.21617	1.39159	1.46973	1.43671	0.854257	1.04695	0.737348	0.649265	3.16151
Gpx1	1.62575	1.68069	1.21584	1.14979	1.22448	0.991715	1.72295	1.42432	7.15486	2.6699	0.605022
Nrcam	0.673257	0.575348	1.2157	0.288531	0.519636	0.495513	0.597704	0.475096	0.140694	0.0675418	4.728
Unc80	0.604567	0.375482	1.2157	0.493552	0.845524	0.438214	0.33032	0.254505	0.11334	0.0241043	0.219279
Srek1	0.601046	0.579397	1.2154	0.633998	0.867904	0.768752	0.346962	0.646843	0.629662	0.457445	1.27079
Ntrk3	0.322491	0.669262	1.21481	0.838812	1.57418	0.599556	0.674065	0.441304	0.134545	0.557004	2.43465
Pgap1	0.606909	0.548153	1.21454	0.565544	0.664382	0.654824	0.395931	0.471429	0.163462	0.0980944	0.298137
Cldnd1	1.05141	1.00345	1.21191	0.910017	0.999825	0.903625	0.826744	0.90212	0.848746	1.01702	1.74955
Snx16	0.851706	0.765357	1.21042	0.564522	0.947129	0.941896	0.7421	0.81017	0.172886	0.215147	0.255528
Rab24	1.0072	0.985783	1.21029	1.27023	1.00615	0.988027	0.860243	1.0779	1.09377	0.857551	1.22398
C230004F18Rik	0.365785	0.219229	1.20886	0.128834	0.732299	0.4152	0.113211	0.137682	0.118591	0.00329953	0.0811182
Brd4	1.12812	1.06657	1.20881	1.25215	1.29091	1.26482	0.877326	1.02175	0.933554	0.916685	0.816178
Sult4a1	1.36803	0.930612	1.20864	0.723317	1.22526	1.02808	0.982195	0.720188	0.23448	0.0574233	0.187561
Cacng4	0.957822	1.12156	1.20815	0.968662	1.05519	1.03356	1.23486	1.2242	0.126462	0.175122	0.338445
Unc119	1.24721	1.11373	1.20687	1.08172	1.1173	1.16909	1.3988	1.16683	0.216081	0.714238	0.996242
Agap3	1.07152	0.861033	1.20626	0.754249	1.13218	1.08547	0.721674	0.810511	0.323738	0.288606	0.385448
Cwc15	1.57825	1.59016	1.20557	1.81826	1.51566	1.65967	1.54874	1.63316	1.33037	1.5273	1.25571
Chd5	0.760186	0.573882	1.20481	0.891674	1.25824	0.865298	0.811329	0.631361	0.139283	0.0639479	0.115105
Tac1	0.274704	0.69069	1.20441	0.0347376	0.0996871	0.25408	1.53328	3.28888	0.13256	0.0440739	0.140645
Epm2aip1	0.979026	0.758573	1.20288	0.936377	1.11561	1.03404	0.69314	0.711412	0.262698	0.348301	0.708295
Sh3bp5	0.689755	0.98782	1.20271	0.759112	0.811335	1.20292	1.10417	1.79474	0.380918	0.672253	0.0657991
Grb2	1.37761	1.40608	1.20207	1.43826	1.43275	1.5073	1.47622	1.49041	1.55048	0.722445	0.610397
Grin1	0.445	0.322683	1.20195	0.178704	0.595383	0.409733	0.224472	0.273081	0.094203	0.0233558	0.108003
Kif2a	1.18942	1.14271	1.19973	0.996915	1.20567	1.09325	0.954121	1.14328	0.388431	0.523858	0.544937
Grm5	0.569702	0.590883	1.19937	0.216537	0.598071	0.922184	0.89244	0.59992	0.118145	0.0226438	1.43447
Emc7	1.2218	0.916149	1.19935	0.915302	1.37087	1.08905	0.550595	0.663352	1.2355	0.961325	3.39529
Ap2b1	1.20342	1.18507	1.19923	1.05381	1.03569	1.02833	1.18051	1.22375	0.464275	0.674512	0.555878
Pcdh7	0.488221	1.03466	1.19909	0.97003	2.01981	1.23237	0.222317	1.09696	0.181641	0.129681	1.66352
Nfu1	1.03438	1.1352	1.19827	1.09609	1.17469	0.916847	1.0349	1.07034	0.765802	0.804674	0.726268
Slc6a17	0.63469	0.424708	1.19746	0.439384	0.697317	0.366905	0.383068	0.167044	0.0987078	0.086344	0.0830067
Wac	1.2758	1.25377	1.19694	1.61425	1.36557	1.40054	1.25023	1.36606	0.652616	0.878834	0.775351
Pigt	0.830516	0.904612	1.19665	0.822664	0.817711	0.887636	1.11169	1.1847	0.935072	0.946841	1.90888
Ctnnb1	1.01932	2.05486	1.19434	1.6757	1.35329	1.25849	1.15912	1.69928	2.00693	3.38561	1.3572
Slc25a11	1.31316	1.4474	1.19411	1.34972	1.17325	1.19736	1.26937	1.29098	1.49846	1.29383	1.15555
Hdgfrp3	1.05356	1.69308	1.19381	1.89944	0.807671	1.24021	1.9028	2.75865	0.0865429	0.738557	0.0493283
Ppp2r2c	0.944411	0.727103	1.19334	0.655622	0.919125	0.902879	1.37024	0.583167	0.133567	0.0526873	0.146617
Wrb	1.07475	0.944709	1.19276	0.791731	0.80719	0.91924	1.08001	0.967849	0.19969	0.371596	0.341154
Cdc42bpa	0.594852	0.534611	1.19238	0.37949	0.661336	0.520472	0.427001	0.466205	0.22529	0.169865	0.647462
Uba52	2.04113	1.90338	1.1923	2.88552	2.32252	2.49891	2.08446	1.71177	2.52894	2.8876	0.691871
Kif21a	1.17153	1.30236	1.19079	0.827777	1.04535	1.46831	0.906924	1.32953	0.183116	0.163445	0.506217
Sys1	1.19008	1.19307	1.19057	1.418	1.31038	1.29432	1.20453	1.06768	1.19825	1.43939	1.44757
Clec2l	0.671971	0.50697	1.18813	0.388234	1.02539	0.696846	0.768657	0.458168	0.10625	0.0948946	0.13632
Ccnl2	0.786478	0.823787	1.18579	1.1776	1.09876	1.13889	0.847115	1.07274	0.827665	0.894236	2.05046
Zc2hc1a	1.08832	1.21875	1.18486	0.814563	0.993399	0.976221	1.29318	1.36304	0.15891	0.531857	0.290457
Sh3glb2	0.860724	0.766399	1.18429	0.814243	0.869441	0.75736	0.670146	0.71237	0.518534	0.635447	1.00742
Cds2	0.692456	0.548091	1.18364	0.675965	0.814345	0.560524	0.39032	0.40163	0.296721	0.172559	0.757038
Gnai1	1.18343	0.853261	1.18317	0.413159	1.17544	0.798355	0.551443	1.23776	0.139243	0.34509	0.185841
Rogdi	0.838745	0.944822	1.18294	1.01433	1.0171	0.736358	0.539378	0.885291	1.41743	0.333221	0.482485
Scg3	1.11156	1.44452	1.18176	1.09585	1.41882	1.01432	1.24519	1.38111	0.15939	0.137178	4.22457
Nudt3	1.29619	1.09829	1.18156	0.93987	1.3268	1.27781	1.20243	1.08635	0.729332	0.427941	0.696296
Nsfl1c	1.34453	1.37919	1.1812	1.28859	1.40298	1.51423	1.27709	1.4926	0.701235	0.964469	0.910844
Sdha	1.01245	1.01461	1.18044	1.00894	1.20105	1.05073	0.936977	0.943371	1.05846	1.32096	1.80631
Esd	1.92085	1.91174	1.17956	1.72885	2.27885	2.01233	1.87928	1.46723	1.79972	2.52165	1.42439
2410002F23Rik	1.04278	1.05681	1.17795	1.19604	1.11929	1.27175	1.27272	1.30925	0.330796	0.87693	0.536379
G3bp1	1.44743	1.38363	1.17741	1.69395	1.48401	1.64134	1.11502	1.40966	1.95517	1.77965	1.24632
Brd2	1.23366	1.27866	1.17676	1.45876	1.24353	1.13539	1.28817	1.55982	1.9676	1.50864	1.17179
Smim10l1	1.27137	1.48252	1.17656	1.44747	1.3344	1.22002	1.21955	1.58194	0.734673	1.36911	0.92923
Ensa	1.12974	0.985999	1.17609	1.07728	1.0837	1.25233	0.899964	1.06971	0.580138	0.56959	0.544579
Raf1	0.681293	0.941593	1.17514	0.697952	0.640047	0.721204	0.961734	1.34169	0.570502	0.698538	1.14413
2700060E02Rik	2.16006	2.68662	1.17489	3.09812	1.27265	2.0631	3.21679	3.29753	0.416816	4.10832	0.215412
Sod2	1.48874	1.42406	1.17489	1.29437	1.50946	1.0692	1.48077	1.12248	0.922696	1.00289	2.06014
Mir124-2hg	0.0631854	1.15306	1.17375	0.148594	0.0445429	0.229845	0.0542162	2.23051	0.0301707	0.0919773	0.155644
Atp2b2	0.434838	0.320361	1.17373	0.324757	0.582007	0.362973	0.265019	0.20666	0.102695	0.0256391	0.501601
Yaf2	1.20715	1.1878	1.17373	1.0725	1.20041	1.08216	0.917468	0.992824	0.756619	0.960931	0.906194
Ppp2r2d	0.99854	1.04423	1.1735	0.849628	0.990915	1.08998	0.781869	1.04398	0.447478	0.508597	0.40708
Gm26917	0.507628	0.574915	1.17334	0.711282	0.581144	0.557508	0.560923	0.567506	0.705573	0.553056	0.682849
Bend6	0.532423	0.40035	1.17331	0.165631	0.342137	0.467111	0.288154	0.464574	0.175686	0.0432235	0.112185
Ntan1	1.24549	1.26677	1.17174	1.03814	1.01053	1.10853	1.45187	1.28503	0.734249	1.46876	0.940737
Prkce	1.26533	0.732762	1.17111	0.682352	0.992817	0.615836	1.08567	0.33333	0.218483	0.235379	0.216417
Celf6	1.79213	1.34814	1.17058	2.06043	2.34202	1.97125	1.00455	1.29271	0.218218	0.0852566	0.265909
Ei24	1.10053	1.0962	1.17055	1.02237	1.06521	0.928293	1.24722	1.04371	0.747758	1.4632	1.21805
Dcakd	1.25833	1.68335	1.16985	1.69224	1.21461	1.58821	1.51798	2.14003	0.621475	1.51386	0.518339
Mrpl14	1.48103	1.30542	1.16912	1.61315	1.49094	1.72536	1.24388	1.18897	0.75278	1.03514	0.87631
Sin3b	1.27413	1.37456	1.16897	1.5779	1.61941	1.5216	1.31288	1.20194	1.84461	1.45629	1.74041
Cep170	0.955151	1.01211	1.16857	0.957405	1.01753	1.05889	1.02227	1.17373	0.548324	0.401299	0.498345
Mzt1	1.55227	1.50068	1.16832	1.55629	1.30112	1.27674	1.8853	1.69403	0.510904	0.566846	0.660173
Cystm1	0.897068	0.87098	1.16788	0.789081	1.13185	0.418165	0.405346	0.658588	0.156137	0.101546	1.11838
Nabp2	1.66734	1.66676	1.16764	1.89486	1.4279	1.91787	1.47091	1.81905	0.56925	0.901386	0.862349
Pak1	1.43488	1.57935	1.16645	1.1927	1.1858	1.74613	1.69862	2.09199	0.57119	0.27891	0.160325
Plekhj1	1.33286	1.20121	1.16555	1.32777	1.19059	1.22509	1.21394	1.15327	1.0563	1.09127	0.811185
Hdgfl3	0.737202	0.536276	1.16466	0.242109	1.06479	0.916649	0.211561	0.221841	0.148122	0.0207404	0.321753
Clptm1	0.863997	0.906098	1.16297	0.788941	0.851516	0.832926	0.875791	0.815508	1.02564	0.973989	2.21913
Gnl3l	1.18298	0.957689	1.16234	1.02485	1.32105	1.08237	0.786365	0.813619	0.220027	0.258867	0.31467
Hecw1	0.619832	0.739738	1.16206	0.436982	0.719104	0.795814	0.682	0.758806	0.063888	0.071537	0.0739729
Hprt	1.27588	0.882362	1.16151	0.823027	1.73215	0.905749	0.625378	0.623402	2.2024	0.376341	0.43464
Mgat4b	0.941945	0.954164	1.16098	0.775362	1.28599	1.14692	0.672067	0.794172	0.846958	0.295498	0.405683
Cdk16	1.05029	1.08695	1.15974	0.819694	0.66052	0.835637	1.02509	1.13639	0.358808	1.09558	0.823206
Gpx3	2.44421	1.57984	1.15798	2.25156	2.11475	1.74767	0.482949	0.619491	0.614901	0.555503	0.370266
Klf6	1.24137	0.893628	1.15609	0.538612	0.684921	0.775547	2.28497	0.600428	2.77274	1.71144	1.75489
Chtop	1.34015	1.46808	1.15422	1.59451	1.10791	1.38621	1.54117	1.84982	0.722573	1.33548	1.08228
Lrrn3	0.620924	0.859398	1.15334	0.702031	0.771694	0.879195	0.483289	0.982923	0.0817345	0.0699522	0.14381
Clasp1	0.831803	0.816309	1.15334	0.941058	0.920254	1.07614	0.689119	0.715308	0.312762	0.504973	0.651724
Ddx50	0.780176	0.66747	1.15284	0.828008	1.07895	0.984483	0.585559	0.621152	0.767633	0.653754	0.975449
Anks1b	0.456134	0.442614	1.15201	0.427364	0.610279	0.800188	0.278385	0.528455	0.130366	0.0442909	0.14609
Ssr2	1.31945	1.47169	1.15179	1.59514	2.17938	1.33335	1.32595	1.11864	1.77582	4.06907	2.46363
Hk1	0.903459	0.710933	1.15143	0.546445	1.02848	0.834116	0.670306	0.764303	0.204235	0.340438	0.471324
Ufc1	1.1641	1.25523	1.15102	1.25708	1.17268	1.21073	1.22924	1.30022	1.29363	1.50068	1.14864
Comt	1.19849	0.969094	1.14975	1.10674	1.11207	1.00933	1.50801	1.16983	2.34359	1.89724	1.38848
Reep2	0.877293	0.756532	1.14944	0.534518	0.789904	0.711642	0.97785	0.631263	0.111583	0.199745	0.504568
Myo5a	0.823379	0.782877	1.14917	0.623245	0.888212	0.874857	0.602397	0.709204	0.367635	0.229844	0.266184
Stox2	0.751166	0.75731	1.14898	0.753828	0.819077	0.809657	0.770716	0.921993	0.168889	0.298074	1.0845
Fhl1	0.799205	0.794861	1.14673	0.793093	1.09614	0.981578	0.92365	1.02149	0.20372	0.134668	0.588522
Mydgf	1.07973	0.944556	1.1455	0.951431	1.02658	0.857353	0.678699	0.790613	1.01007	1.52678	1.55242
Acbd6	1.16289	1.09649	1.1448	1.10686	1.18508	1.35352	1.29333	1.04784	0.683525	0.803456	0.749462
Wdr83os	1.40582	1.29622	1.14415	1.13681	1.35758	1.30421	1.25992	1.18206	1.4194	1.22775	0.743672
Btf3l4	1.58681	2.05627	1.14339	2.45381	1.03836	1.61696	2.13773	2.72835	0.42061	1.56146	0.42516
Nhlh2	1.81887	3.72351	1.1422	0.203111	4.62617	0.138787	2.19013	2.40393	0.0908743	0.365645	0.143548
Arpc4	1.23696	1.33833	1.14155	1.17799	0.899918	1.10328	1.73987	1.49619	3.57579	1.20365	0.795002
Adrm1	1.21499	1.34551	1.14134	1.42541	1.21002	1.2916	1.12673	1.39307	0.827134	0.93545	1.00689
Dnajc8	1.322	1.52647	1.13999	1.6197	1.53187	1.67791	1.41787	1.67588	1.08921	1.1372	0.846598
Atcay	0.93702	0.892297	1.13895	0.835442	0.776516	0.985949	0.726933	0.984675	0.0929345	0.10204	0.149215
Dtna	0.606966	0.478776	1.13876	0.456758	0.917974	0.525436	0.356335	0.268019	0.144561	0.0293104	3.41266
Rev3l	0.533138	0.466568	1.13848	0.526912	0.900965	0.68337	0.447779	0.691863	0.222139	0.239583	0.808054
Adgrb1	0.443955	0.473088	1.13746	0.585495	0.769072	0.615772	0.516933	0.463305	0.158144	0.0567231	2.76643
Lgmn	0.425198	0.491449	1.13693	0.324945	0.740599	0.566731	0.194856	0.387948	36.2946	0.454662	3.11666
Nova2	1.16249	1.16122	1.13667	1.16039	1.39605	1.35648	0.882741	0.94583	0.104059	0.153554	0.235702
Azin1	0.691553	0.862627	1.13628	0.796065	0.60109	0.719501	1.00197	1.21486	0.611043	0.548845	0.902748
D430019H16Rik	0.998492	1.03306	1.13592	1.38047	1.29337	1.4287	1.25724	1.41929	0.149721	0.442953	0.117376
Wnk1	0.744652	0.686166	1.13493	0.745035	0.986331	0.672848	0.592144	0.584422	2.93697	0.770339	1.26738
Kmt2a	0.64698	0.585003	1.13383	0.570144	0.863805	0.620604	0.41078	0.570283	0.443077	0.320384	0.650677
Leng8	0.519654	0.48962	1.133	0.650934	0.803302	0.564745	0.552385	0.56062	0.289874	0.285606	2.32396
Ergic2	0.990675	1.09692	1.13255	0.971434	1.08253	0.882822	0.841648	0.918718	0.746682	1.05181	0.783363
Gria1	0.923685	0.911722	1.13137	0.868683	2.14839	1.13994	0.855733	0.371436	0.157644	0.111694	0.806864
Csdc2	0.655435	0.758206	1.13062	0.937536	0.477908	0.728912	0.578716	0.74905	0.126403	0.498187	1.10476
Ube2j2	1.40415	1.39757	1.12892	1.4331	1.13224	1.35021	1.25967	1.30181	0.764731	1.10625	0.623255
Taok1	0.900684	0.75197	1.1289	0.967888	0.943711	0.863814	0.66725	0.677471	0.737955	0.429103	1.16114
Pum2	1.16311	1.04301	1.12886	1.3594	1.18447	1.18845	0.96519	1.17799	1.07129	0.645315	0.977434
Kif21b	0.662784	0.760641	1.12774	0.703888	0.653748	0.983884	0.712013	0.805502	0.88754	0.160055	0.503019
Pmm1	1.08295	0.950103	1.12766	0.693523	0.995896	0.875713	0.727448	0.547396	0.40855	0.667694	4.42383
Mrpl11	1.20795	1.1884	1.12604	1.1231	1.2236	1.23504	1.30698	1.15982	0.70324	0.897393	0.791863
Vps35	1.17603	1.15001	1.12478	1.02197	1.26389	1.31695	1.09394	1.15096	1.19184	0.69616	1.08252
Stx1b	0.680063	0.568532	1.12391	0.508944	0.619035	0.578586	0.503005	0.683663	0.163288	0.100158	0.295508
Ptpra	0.836678	0.78322	1.12364	0.77185	0.741664	0.720388	0.992772	0.907929	1.37688	0.886615	3.03674
Cux1	0.969428	0.877445	1.12285	1.09685	1.01694	0.982618	1.30115	0.949029	1.26551	0.626554	0.897325
2310036O22Rik	1.55936	2.06931	1.12218	2.78456	0.939832	1.7216	2.59107	2.56913	0.260918	1.95463	0.193421
Fyttd1	1.21119	1.17853	1.12123	1.18576	1.36215	1.283	1.10402	1.06559	0.590642	0.553044	0.734938
Ccdc107	0.787968	0.768557	1.12023	0.791845	1.05488	0.885267	0.643618	0.724367	0.597443	0.613728	0.986888
Tusc2	0.931309	0.966762	1.1197	0.574856	0.400107	0.677128	0.896471	1.01857	0.39306	0.657193	0.419111
Aamp	1.57789	1.39619	1.11911	1.72527	1.81127	1.67879	1.274	1.34975	1.87115	1.78072	1.53157
Pdzrn4	0.0919945	0.120619	1.11879	0.369314	0.130042	0.140005	0.023708	0.395186	0.0226919	0.0445668	0.0244774
Dtnbp1	0.655466	0.812092	1.11839	0.562966	0.701234	0.903338	0.780882	0.946075	0.854146	0.610774	0.416986
Chmp4b	1.53585	1.26682	1.11827	2.11718	1.4485	1.59292	1.25802	1.27772	1.58954	2.26479	1.48632
Aff4	1.06824	0.945876	1.11651	1.25317	1.38236	1.06083	0.834286	0.76401	0.564123	0.69143	0.719939
Dync1li1	1.31899	1.35654	1.11497	1.14713	1.21907	1.28942	1.24636	1.21623	0.412675	0.585037	0.445319
Apc2	0.830539	0.989223	1.1146	1.04598	0.938068	1.26471	0.915791	1.40871	0.0821199	0.204812	0.531026
Bicd1	0.652753	0.630363	1.1141	0.614055	0.686191	0.709341	0.458799	0.664952	0.0748757	0.0932593	0.625291
Csk	1.09533	1.2633	1.11408	0.995973	0.949638	1.0655	1.28732	1.21393	1.54973	0.750018	0.385886
Tomm70a	1.16412	1.02303	1.11372	0.953427	1.07141	1.1403	0.948486	1.02449	0.436555	0.57609	0.441085
Ash1l	0.740855	0.632643	1.11371	0.851915	1.09772	1.05415	0.630729	0.70354	0.71581	0.590152	1.27743
Nlgn2	0.824096	0.865438	1.11351	0.985497	0.868688	0.844055	0.844926	0.791069	0.113668	0.338349	0.370781
Suclg1	1.42635	1.29167	1.11263	1.32976	1.64936	1.41548	1.0885	1.10196	1.00045	1.17617	2.72824
Clmp	0.503225	1.16675	1.1122	0.568008	0.661872	0.45656	0.898998	1.34745	0.176278	1.6351	0.0543468
Gm44644	0.417847	0.247379	1.11125	0.132006	0.627896	0.312446	0.0694873	0.107057	0.0623257	0.00360299	0.0609675
Rimklb	0.740024	0.767135	1.11052	0.815787	0.674847	0.798132	1.04031	1.01523	0.103348	0.208507	1.09874
Rab12	1.10808	0.906187	1.11033	0.719258	1.41399	1.43187	0.515222	0.676549	0.743914	0.434402	0.898044
Tomm5	1.50941	1.22592	1.11023	1.13196	1.00975	1.1747	1.46536	1.05095	0.692318	1.74391	0.987577
2410004B18Rik	0.914496	0.860857	1.11006	0.860853	0.998842	1.02425	0.817931	1.03652	0.54366	0.500725	0.629245
Bag6	1.1724	1.17192	1.10996	1.44938	1.2758	1.46706	1.18602	1.73176	0.740971	0.963056	0.77307
Rpp21	1.0945	1.09509	1.10982	1.22205	1.23139	1.18878	1.30385	0.9304	0.395025	0.703792	0.544644
Tram1l1	0.906118	1.0808	1.10954	0.939296	1.20229	0.946067	0.930626	1.28229	0.113443	0.42639	0.589318
Cacna1e	0.528622	0.536063	1.10896	0.404032	0.601079	0.593395	0.35989	0.377468	0.0842696	0.260096	0.0948204
Kcnma1	0.458242	0.477525	1.10846	0.30949	0.640731	0.545017	0.168142	0.343577	0.126206	0.024989	0.364791
Aig1	1.36494	1.06307	1.10842	0.995232	1.5246	1.22664	1.38079	0.878997	0.447451	0.312689	0.959319
Taok3	1.09905	1.1001	1.10802	1.05355	1.04931	1.01596	0.956554	1.064	0.515145	0.365522	0.434235
Fam173a	0.914053	0.734526	1.10749	0.919227	0.941	0.708704	0.516052	0.609535	1.07117	0.732834	1.90778
Usp14	1.04065	0.978999	1.10732	0.920906	1.17006	1.02981	0.758893	0.912458	0.6526	0.679827	0.725712
Cops8	1.23094	1.20339	1.10663	1.38135	1.30252	1.35284	1.45492	1.22699	0.68265	1.02713	0.849081
March5	1.07991	1.20612	1.10656	1.14014	0.860424	0.923718	1.15108	1.66991	0.892337	1.1956	0.82299
Prkar2a	1.66568	1.45655	1.10589	1.36227	1.5951	1.33846	1.13383	1.12368	0.399549	0.423584	0.93962
Sf3b5	1.47169	1.40433	1.1049	1.49581	1.11538	1.68211	1.40712	1.24746	1.31845	1.82622	1.05029
Micu3	1.22137	1.04487	1.1043	1.01135	1.54119	1.32984	0.934683	0.669184	0.260465	0.188452	0.521149
Purb	0.963476	0.668993	1.10368	0.640577	0.923812	0.728749	0.407251	0.659262	1.36857	0.67577	1.68178
Med25	0.857854	0.832898	1.1022	1.1415	0.892745	1.09344	0.705764	1.33194	0.583674	0.816741	1.05113
Fam96b	1.97046	1.61284	1.10133	2.1713	1.38292	1.6454	1.48192	1.319	0.781681	0.877394	0.701725
Cdv3	1.23284	1.12987	1.10018	1.18215	1.05347	0.980701	1.1114	1.00773	0.800609	1.36035	0.791228
Arid1a	1.14178	1.21972	1.09982	1.4527	1.22744	1.27271	1.01403	1.35042	1.13307	0.92093	0.992978
Macrod2	0.664814	0.740675	1.09952	0.48049	0.5567	0.499057	0.930294	1.0794	0.111731	0.349543	0.273185
Nudcd3	0.926956	0.92786	1.09803	1.02436	0.851036	0.981352	0.994584	1.0557	0.432672	0.599949	0.703753
Psmc1	1.28022	1.25474	1.09668	1.18917	1.17205	1.19454	1.10304	1.31356	0.679551	0.939619	0.953823
Gars	1.18332	1.28818	1.09582	0.842331	0.938379	1.09248	1.25888	1.44901	0.576759	0.673887	0.409082
Sorbs2	0.365257	0.566833	1.09433	0.383645	0.523741	0.511349	0.365725	0.657135	0.0594185	0.100409	0.368783
Ola1	0.988197	0.949599	1.09417	0.827758	0.995425	0.888709	1.06209	0.870864	0.794597	1.13295	0.604918
Cdkn1a	0.246375	0.19946	1.09381	0.0554425	0.12819	0.0715243	0.106422	0.216168	1.05738	0.423254	0.219236
Celf1	1.07303	1.13387	1.09351	1.27978	1.28402	1.23108	1.03581	1.16717	0.772576	0.737569	0.769821
Sap18	1.32905	1.22604	1.09326	1.44604	1.40285	1.41724	0.995591	1.02601	1.08192	1.18516	1.0223
Dut	1.20913	1.16524	1.09325	0.999307	1.25688	1.32722	1.14983	0.969838	0.615702	0.698739	0.436686
Akap8l	0.507113	0.488471	1.09273	0.556599	0.931927	0.750801	0.363024	0.439054	0.712808	0.377232	0.512597
Mtpn	1.33715	1.19601	1.09196	1.15435	1.18078	1.17363	1.28705	0.909553	0.899629	1.26544	0.824309
Cnih1	1.35217	1.44351	1.09134	1.23994	1.12092	1.19835	1.67063	1.34074	0.838261	1.89699	1.19342
Prrc2a	1.08557	1.00273	1.09089	1.15086	1.33915	1.11072	0.902892	0.924497	1.08642	0.869425	1.21735
Ahsa1	1.15556	1.16941	1.09038	1.2479	1.2621	1.31327	1.11341	1.22348	0.865966	0.840251	0.81927
U2surp	0.82907	0.926538	1.08849	0.913781	1.15301	1.04246	0.810745	0.948804	0.795451	0.768797	0.984576
Mrps15	1.03316	1.02644	1.08832	0.891519	0.85058	0.890827	0.834095	0.911586	0.703811	0.892496	0.704773
Pkig	1.06641	1.39589	1.0874	1.56172	1.40652	2.03248	0.900975	1.04842	2.20801	0.908131	0.638292
Epb41l1	0.780931	0.686463	1.08728	0.492792	0.881946	0.905477	0.487091	0.509582	0.148773	0.219966	0.237044
Pdgfa	0.586097	0.437856	1.08669	0.345926	0.529943	0.564091	0.274608	0.280691	0.30256	0.279871	0.144802
Snrpc	1.53982	1.60981	1.08603	1.95757	1.63649	1.87696	1.96543	1.8126	0.857335	1.7937	0.888924
Impad1	0.968104	0.780412	1.08566	1.05472	0.934293	1.09311	0.658421	0.690526	0.362217	0.648146	1.20319
AC160336.1	0.472236	0.303973	1.08417	0.261407	0.784929	0.462114	0.107727	0.151072	0.783996	0.0880268	0.628661
Phax	1.26768	1.28581	1.08414	1.33044	1.35756	1.48669	1.16928	1.3763	0.747539	0.919627	0.729129
Sbno1	0.935674	0.983134	1.08322	1.18287	0.953944	0.936695	0.83484	1.12453	0.792819	0.739907	0.944634
Arid4b	0.945136	0.892069	1.08242	1.2459	1.22728	1.20424	0.630054	0.938111	0.671868	0.666135	0.777596
Vps28	1.10341	0.693528	1.08136	0.366206	1.60993	1.19365	0.210675	0.309565	1.32011	0.068875	1.12662
Jakmip1	0.752445	0.584249	1.08131	0.55414	1.10026	0.678782	0.699109	0.605108	0.105761	0.0256392	0.237658
Map4k4	0.951264	1.15334	1.08067	1.1654	1.19938	1.25735	1.02749	1.31242	1.08132	0.969351	1.59502
Hspa9	1.12773	1.06722	1.08009	0.97009	1.2419	1.18323	1.08949	1.1651	0.818868	1.18593	1.13737
Aprt	2.19881	1.70644	1.07991	1.84787	1.63921	1.90303	2.07246	1.01414	1.00684	2.4156	0.581493
Adam23	0.568358	0.46477	1.07973	0.501466	0.706783	0.606738	0.582266	0.293749	0.0760379	0.0471026	0.103491
Cdkn1c	2.28935	2.93349	1.07909	2.27959	0.552173	1.34752	1.80468	1.89473	0.649858	15.6232	0.224507
Camk2b	0.860909	0.684355	1.07591	0.926697	1.16494	0.999581	0.674571	0.707775	0.194515	0.106909	0.183819
Mrpl18	1.01547	1.20363	1.07499	0.938297	0.696729	0.936036	0.954067	1.40847	0.880522	1.17821	1.06454
Mrpl23	1.39502	1.40332	1.07474	1.41415	1.31643	1.31821	1.77436	1.52255	1.412	1.4833	0.868735
Got1	0.825646	0.739234	1.07419	0.445668	1.00603	0.687653	0.65497	0.720399	0.460615	0.169199	0.601189
Txnl4a	1.24479	1.10354	1.07376	0.93437	0.989369	1.19332	1.01508	1.13086	0.510807	0.905768	0.628672
Kras	1.2352	1.23074	1.07152	1.13537	1.07219	0.99479	1.43855	1.36224	1.08595	0.744578	0.530265
Cfap36	0.939955	0.973866	1.07092	0.850994	1.45264	0.977795	0.611548	0.853941	0.375157	0.524557	0.928117
Fam168a	0.624093	0.578458	1.07067	0.529672	0.65948	0.661183	0.619467	0.851834	0.40125	0.286418	0.91906
Ccdc28b	1.06717	1.29127	1.06901	1.39174	1.09593	1.18527	0.867328	1.21804	0.401114	1.0151	1.40028
Tmem208	1.07635	1.10193	1.06829	1.01857	1.06957	1.02739	1.24164	1.00198	0.787359	0.98708	1.30354
Zcchc17	1.13288	1.0673	1.06687	0.956566	0.926713	1.07051	1.00888	1.14532	0.567125	0.706953	0.495905
Prkra	1.16665	1.36767	1.06597	1.08723	1.04142	1.25229	1.41526	1.22292	0.596206	0.886747	0.56611
Dbi	1.02936	1.23809	1.06567	0.988684	0.889156	0.918907	0.715367	0.792208	4.85288	3.61162	33.8635
Aimp1	1.31339	1.31922	1.06543	1.35219	1.57751	1.49361	1.16289	1.17136	0.998332	1.19137	0.852874
Mtfr1l	0.955024	1.01043	1.06496	0.935556	0.774618	0.886104	1.08652	1.10893	1.13954	0.948385	1.01638
Mrpl28	1.19209	1.21103	1.06429	1.20972	1.20304	1.26923	1.1397	1.14144	0.824429	1.25374	1.01053
Acly	1.1782	1.4155	1.06393	1.08363	0.928339	1.00198	1.03337	1.27998	0.622703	0.598448	0.767519
Rbm17	1.31452	1.34968	1.06392	1.18601	1.00203	1.0971	1.31119	1.34222	0.836363	1.29091	0.490743
Manbal	1.06103	0.903724	1.06353	1.06381	0.915001	0.973489	0.938964	1.03183	0.572834	1.0272	0.960822
Tspan17	1.67469	0.872868	1.06293	0.463007	0.720858	0.336503	1.23641	0.296624	0.140908	0.432614	0.150664
Rab5a	1.18685	1.3518	1.0629	1.38757	0.900681	1.03697	1.29859	1.36935	0.6005	0.95657	1.06108
Nell1	0.272737	0.308719	1.06274	0.150285	1.31299	0.428863	0.273367	0.185007	0.056631	0.0311881	0.0494691
Slirp	1.43483	1.47336	1.06264	1.84512	1.35556	1.47243	1.58847	1.42875	0.520968	1.45963	0.544367
Dgcr6	1.58999	1.59814	1.0626	1.56385	1.27619	1.3715	1.76948	1.61151	0.476216	1.00139	1.16014
Nav3	0.429588	0.431582	1.06242	0.306024	0.712309	0.504641	0.33974	0.334331	1.14094	0.0499634	0.201635
Lrp1	0.594888	0.629222	1.06161	0.525386	1.00111	0.850162	0.48182	0.691978	2.42845	1.58913	5.74928
Tiprl	1.21347	1.12408	1.06112	1.15377	1.18701	1.18003	1.18612	1.20849	0.822174	0.678628	0.752738
Atxn2	0.75769	0.6592	1.06101	0.628988	0.90333	0.752537	0.57229	0.65393	0.436374	0.470561	0.983904
Clcn4	0.677557	0.939637	1.05978	0.728523	0.682993	0.796676	0.711144	1.26316	0.60448	0.613927	0.916274
Tmem91	0.523769	0.348486	1.05966	0.245833	0.421041	0.456055	0.239943	0.245592	0.126292	0.0259735	0.12059
Nfasc	0.639846	0.601495	1.05945	0.596693	0.817768	0.57221	0.398972	0.572487	0.103131	0.0615714	0.2927
Ubap2l	1.11994	1.00076	1.05784	1.31447	1.25063	1.22479	0.985132	1.00591	1.11542	1.22254	0.967814
Btbd1	1.27554	1.26463	1.05689	1.36124	1.14522	1.06728	1.31605	1.4107	0.768419	0.926677	0.758691
Enpp5	0.534751	0.496441	1.05629	0.391071	0.626763	0.667996	0.448448	0.585717	0.0917047	0.0810361	0.728862
Fam104a	1.40373	1.12188	1.05563	1.42941	1.14953	1.17804	1.11468	1.14835	0.790736	1.4118	0.914065
Tonsl	1.21619	1.76232	1.05427	2.04457	0.813033	1.23324	2.59444	2.04991	0.149878	1.20684	0.126034
Cops4	1.10385	1.21652	1.0541	1.17674	1.16534	1.16672	1.09701	1.20739	1.2863	1.22918	0.956521
Akirin1	1.21246	1.32984	1.05356	1.43749	1.04681	1.24248	0.966097	1.2526	1.43182	0.651624	0.872161
Rnf126	1.05727	0.921647	1.05271	1.02387	0.972873	1.12317	0.88425	1.07012	0.558954	0.66378	0.585773
Akt1	1.17784	1.14125	1.05248	0.890303	1.23587	1.05476	1.40314	1.21704	1.73284	1.24497	0.761256
Ifngr2	0.537454	0.690491	1.05228	0.390299	0.521245	0.397228	0.731437	0.514821	1.25068	0.532301	0.368216
Mcrs1	1.1433	1.32458	1.05225	1.12895	0.944269	0.959272	1.43675	1.4072	0.733959	0.83763	0.689877
Cdc37	1.23858	1.63834	1.05196	1.40732	1.32281	1.43949	1.43984	1.72974	1.58531	2.17154	0.641979
Cyhr1	0.910816	0.766761	1.05179	0.620665	0.956393	0.761886	0.530232	0.594408	0.690273	0.704655	1.84729
Cbln4	0.0916845	0.135433	1.05157	1.73285	0.0326786	0.0996488	0.491931	0.258337	0.0294978	0.0234028	0.0162801
Faim2	0.711112	0.416677	1.05081	0.506466	0.670727	0.539537	0.386735	0.43118	0.109341	0.0211321	0.0843636
0610010F05Rik	0.875885	0.93622	1.05067	0.726782	0.794401	0.767304	1.33358	1.19061	0.164995	0.252201	0.219555
Zmym3	0.74267	0.652341	1.05064	0.729514	0.926811	0.942801	0.850748	0.620566	0.314841	0.37704	0.43741
Kalrn	0.425309	0.47146	1.05039	0.480794	0.660321	0.669275	0.272352	0.516405	0.0827653	0.17917	0.543196
Eif1ax	0.901588	0.947787	1.04969	0.707491	0.547336	0.532478	1.33573	0.976391	0.732229	1.71115	0.80127
Papola	1.314	1.30743	1.04956	1.55927	1.1096	1.18063	1.22422	1.37035	0.929732	1.34669	0.83226
Lrp1b	0.233391	0.321951	1.04941	0.142937	0.423924	0.324025	0.235221	0.882191	0.0567098	0.0473515	2.58298
Shisa4	0.788585	0.978511	1.04933	0.652894	0.618757	0.663823	0.560635	0.639231	0.215735	0.999372	2.40485
Ttyh3	0.540244	0.689726	1.04914	0.597963	0.463368	0.552937	0.523886	0.944688	0.932336	0.498643	3.51766
Gabbr2	0.33601	0.310961	1.04898	0.235544	0.360989	0.376681	0.134146	0.179705	0.103031	0.0198828	2.9787
Eif3g	1.24291	1.34641	1.04862	1.49643	1.25019	1.27702	1.42662	1.39884	0.775685	1.52822	0.795245
Mrps12	1.24624	1.112	1.04856	1.22715	1.0759	1.16631	0.913866	0.95137	0.61707	1.14195	1.01111
Ost4	1.06922	1.11494	1.04844	0.747743	0.375668	0.465476	1.06586	1.07425	2.07587	3.88039	1.51348
Synpr	0.593171	0.351056	1.04811	0.12498	0.133041	0.479636	0.0902908	0.0787727	0.0964679	0.0220205	0.0988599
Dhx30	0.790862	0.846103	1.04752	1.06372	0.953116	0.927006	0.778285	1.31464	0.369156	0.61272	1.03108
Ip6k1	0.859056	0.841046	1.04745	1.02945	1.01095	1.05082	0.874719	0.905216	0.612313	0.61066	0.926885
Fbl	1.05778	0.994856	1.0473	1.16808	1.0512	1.06694	1.12669	1.1057	1.00211	1.3361	0.54159
Vapb	1.42784	1.21329	1.04478	1.17745	0.958254	1.0293	1.26938	1.05924	0.892952	1.41581	0.549986
Tmem29	1.07705	0.919735	1.04453	1.1372	0.93335	1.28347	0.71296	0.762469	0.283995	0.452423	0.522493
Stx1a	0.743619	0.709546	1.04374	0.39952	0.757729	0.668081	1.13963	0.669126	0.107161	0.190814	0.171601
Dusp8	0.907159	0.985753	1.04372	1.4146	0.95672	0.978717	0.756943	0.999525	0.138711	0.0908826	0.160055
Ccnt2	0.589608	0.70535	1.04368	0.757942	0.552671	0.689633	0.750755	1.085	0.321114	0.448158	1.37326
Ap2a1	0.872883	0.767259	1.04355	0.739005	0.775817	0.821869	0.674867	0.861227	0.523997	0.588302	0.576785
Lrrc58	1.31264	1.10484	1.04339	1.62444	1.25835	1.28468	0.942294	0.620184	0.555951	0.778249	1.58941
Syngr1	0.54351	0.407958	1.0433	0.359072	0.515341	0.389466	0.257734	0.445048	1.95196	0.118786	0.626971
Pde6d	1.1109	1.06139	1.04168	1.22183	1.08554	0.919893	1.42882	0.96743	0.447599	0.928088	0.750893
Mpnd	1.01876	1.29952	1.04167	1.21648	0.800908	0.789802	1.41708	1.9784	0.52078	1.28264	0.480686
Clu	0.498433	0.277836	1.04122	0.362776	0.463021	0.488817	0.20833	0.302341	0.55953	0.0890826	29.7045
Arl2	1.28252	1.26104	1.04051	1.15131	1.27104	1.20416	1.36799	1.15423	0.447002	0.863874	0.763671
Nt5c3	1.17154	1.19804	1.04012	1.0382	1.29854	1.29131	1.4219	1.29673	0.279124	0.368912	0.438946
Glrx2	1.02879	0.962366	1.03991	0.881664	0.805697	0.945573	1.11069	0.981216	0.449744	0.69146	0.809797
Pigp	1.49501	1.34531	1.03983	1.44957	1.55106	1.49755	1.21613	0.973578	0.582254	1.21498	1.20001
Sdhc	1.03388	1.17945	1.03908	1.04014	0.830525	0.948654	1.24106	1.10833	0.773958	1.361	1.05314
Ssna1	1.35323	1.32897	1.03854	1.21739	1.00621	1.0589	1.54141	1.19379	0.798375	1.19956	0.766788
Atp6v1c1	0.934627	0.911988	1.03746	0.816785	0.852668	0.884619	0.909953	0.873431	0.681066	0.471066	0.461801
Eno2	0.407309	0.324866	1.03744	0.266542	0.334465	0.239186	0.357614	0.344623	0.153937	0.0924406	0.156986
Armc1	0.970717	1.04508	1.03672	0.939592	0.912308	0.985996	0.813436	1.03718	0.513156	0.784342	0.92242
Tmem160	0.927253	0.8691	1.03655	0.538857	0.671663	0.571078	1.14269	0.861539	0.873393	0.752167	0.836151
Plppr2	0.958863	0.969384	1.03629	0.867809	0.826321	0.850615	0.948151	0.939103	0.110996	0.30934	0.160327
Phb	0.932376	0.901117	1.03575	0.843109	1.01917	1.01811	0.863235	0.87534	0.519468	1.25269	0.759423
Pum1	0.960252	0.916336	1.03469	1.22431	1.19476	1.25674	0.674158	1.08372	0.775439	0.78936	0.901755
Sptssa	1.93244	2.02473	1.03462	1.71514	2.04896	1.71826	2.42621	1.72202	2.16437	2.043	1.11631
Polr2g	1.36618	1.25026	1.03409	1.37139	1.49093	1.43166	1.32675	1.14951	1.05456	1.04922	1.07099
Sltm	0.86849	0.961449	1.0339	0.810975	1.05633	0.887055	0.850381	1.1664	0.685445	0.622009	0.765987
Sh3gl2	0.535818	0.64874	1.03297	0.211371	0.646222	1.02078	0.214719	0.718709	0.111873	0.0162502	0.691845
Cab39	1.00623	1.03947	1.03174	0.836182	1.05029	0.944672	0.809446	0.948098	0.579994	0.484878	0.510351
Prr3	1.03628	0.885608	1.03121	0.987365	1.05674	1.13555	1.0242	0.962691	0.317951	0.381022	0.538465
Synj1	0.718274	0.62603	1.03099	0.6043	0.705929	0.672174	0.505679	0.543148	0.516707	0.180593	0.584842
Ap3b2	0.730376	0.760462	1.03017	0.647653	0.820808	0.745935	0.695602	0.744846	0.109104	0.0914603	0.27116
Eif3m	1.27509	1.53691	1.03	1.42063	1.40829	1.43569	1.43758	1.47039	1.40052	2.24062	0.999088
Serpini1	0.278224	0.634362	1.02895	0.196356	0.613666	0.374278	0.388283	1.40553	0.0460067	0.10975	0.115449
Cpeb4	0.568471	0.520406	1.02893	0.563906	0.779309	0.625457	0.303863	0.325721	0.484595	0.150117	1.38703
Fam110b	0.732195	0.638303	1.02804	0.595271	0.525789	0.954492	0.491132	0.943287	0.118505	0.737045	0.299342
Tub	1.28709	0.893329	1.02765	2.03469	1.7096	1.31296	1.19066	0.769081	0.156429	0.172777	0.232773
Bloc1s2	1.32666	1.29635	1.02743	1.34032	1.09664	1.20635	1.3822	1.31866	0.478673	0.7499	0.591344
Ptprf	0.791566	0.805075	1.02739	0.790128	0.944275	0.856843	0.546475	0.777305	0.145121	0.447006	0.976208
Rfng	0.394832	0.539938	1.02735	0.31221	0.305453	0.335755	0.628615	0.886489	0.200717	0.359627	0.310636
Nsd1	0.780575	0.685134	1.02712	0.8027	1.04186	0.835416	0.539692	0.592077	0.630196	0.527979	0.967924
Paip1	1.14024	1.17879	1.02707	1.33433	1.37018	1.5232	0.962289	1.2805	0.429277	0.302975	0.486749
Lsm5	1.14957	1.10223	1.02593	1.40485	1.1366	1.37731	1.10757	1.03158	0.856173	1.35931	0.636174
Dmtn	0.662759	0.571314	1.02581	0.597193	0.70895	0.595149	0.45121	0.514643	0.117729	0.0528421	0.11145
Gnb4	0.965285	0.835808	1.02513	0.773364	1.56094	0.917622	0.90713	0.518283	0.168464	0.852234	0.46468
Msl1	0.991917	0.958625	1.02441	1.01542	1.09024	0.944554	0.80267	0.879104	0.784496	0.853573	0.839643
Taf10	1.23182	1.08574	1.02302	1.04975	1.0261	0.940984	0.79788	0.719439	1.50738	1.13719	1.05719
Retreg2	0.923355	0.560497	1.02289	0.318031	1.20013	0.91472	0.17412	0.259211	0.633452	0.0466296	0.730999
Psmd3	0.878443	0.905603	1.02286	0.83742	0.967476	0.894064	0.815763	0.794876	0.913969	1.06136	0.99156
Otub1	1.23811	1.11339	1.02286	1.07299	0.992425	1.04895	1.06095	1.17414	0.71029	0.992944	0.916016
Banf1	1.07894	1.15538	1.02262	1.21496	1.02387	1.16101	1.60883	1.29354	0.704129	1.09992	0.635994
Hectd1	0.811905	0.706992	1.02228	0.678692	0.98891	0.868787	0.442657	0.589205	0.759631	0.617374	1.14881
Clptm1l	0.90701	0.85181	1.02164	0.744989	0.755221	0.756853	0.77906	0.936031	0.951856	1.08187	0.763052
Daam1	0.614198	0.776178	1.02156	0.545458	1.04813	0.901711	0.571555	0.639452	0.17623	0.127674	0.547685
Ubald2	1.23766	1.94124	1.02018	1.88391	1.1019	1.51214	1.61107	2.28901	1.19425	1.16885	0.635825
Shd	0.7064	1.05334	1.0197	0.927816	0.734587	0.94124	0.872682	1.45232	0.0925566	0.338585	0.405572
Bscl2	0.757102	0.793948	1.01963	0.921668	0.786328	0.660846	0.519206	0.768488	0.585118	0.720856	0.50052
Tpr	1.10415	1.10909	1.01931	1.0413	1.491	1.18614	1.09002	0.933085	1.27463	1.21119	0.829832
Cnot7	1.33304	1.29497	1.01822	1.88941	1.2605	1.69887	1.39692	1.50691	0.496222	0.528481	0.726423
Cpsf6	0.953789	0.990891	1.01817	1.21703	1.08463	1.0201	1.04687	1.22647	0.576204	0.827896	0.898831
Slc30a9	1.00629	0.99519	1.0181	0.909602	0.964259	1.00326	0.890997	0.962174	0.453583	0.486945	0.688845
Clpp	1.16567	1.05273	1.01789	1.36658	1.13979	1.21556	1.13166	1.05223	0.417771	0.776134	0.916103
Ncoa7	0.659842	0.542079	1.01714	0.388657	0.725871	0.641705	0.345836	0.339123	0.184087	0.196865	0.224253
Kifc2	0.330134	0.301519	1.01692	0.188288	0.356969	0.342957	0.32766	0.251115	0.0860799	0.0527524	0.25217
Ppp2r5b	0.885614	0.921638	1.01654	0.773661	0.778843	0.858641	1.13739	0.958549	0.147841	0.33313	0.379946
Gapvd1	0.750726	0.721577	1.01629	0.720245	0.936829	0.893512	0.723467	0.736138	0.687453	0.391678	0.786163
Dhx36	0.733869	0.69585	1.01588	0.710701	0.974862	0.916145	0.603161	0.669947	0.497119	0.408687	1.18366
Map2k4	0.719835	0.540574	1.01338	0.605066	0.838378	0.569111	0.428405	0.480064	0.261972	0.255745	0.392632
Snn	0.675368	0.973008	1.01309	0.562934	0.426965	0.55549	1.16925	1.56702	1.43451	0.573107	0.875103
Wasf1	0.699974	0.894443	1.01305	0.731807	0.553201	0.863285	0.709034	1.29912	0.112382	0.293868	0.320608
Mrps36	1.1453	1.05534	1.01286	0.871585	0.84945	0.807537	1.27511	0.988178	0.706045	1.19366	0.919177
H2afv	1.44237	1.90135	1.01269	3.06578	1.7894	1.91308	1.84098	3.01845	2.61297	5.68571	1.96855
Fzr1	0.891279	0.954919	1.01264	0.921601	0.894416	1.02017	0.73409	1.00466	0.599071	0.42513	0.45051
Oprl1	0.632995	0.592994	1.01188	0.633092	0.796215	0.689337	0.68637	0.674961	0.0881754	0.0716821	0.128695
Atf2	0.938365	0.987572	1.01187	1.03716	0.884229	0.947484	0.898083	1.21581	0.375679	0.560003	0.538898
Supt4a	1.34894	1.38594	1.01147	1.48678	1.43628	1.45052	1.06204	1.50842	1.50579	1.4613	0.851778
Nexmif	0.557575	0.600127	1.0111	0.195263	0.460036	0.684166	0.0887989	0.423024	0.115235	0.00527205	0.116705
Ssr1	1.02389	0.957277	1.01104	1.12832	1.17597	1.01621	0.953951	0.911241	1.23037	1.72581	1.1696
Gmfb	0.771864	0.767772	1.011	0.660594	0.707467	0.753223	0.587991	0.751478	0.613564	0.456066	0.444519
Nhp2l1	1.59285	1.72255	1.01096	2.55829	0.947497	1.58384	2.65116	2.0965	0.290377	1.97279	0.174739
Thy1	0.214746	0.32409	1.0105	0.119396	0.0320265	0.186204	0.464908	0.284756	0.0971096	0.00770309	0.570224
Tmem183a	1.07423	1.11117	1.01015	1.09891	0.84468	0.865284	1.42513	1.2819	0.420694	0.613787	0.389659
Trim44	0.96757	0.85718	1.00996	0.88315	1.01162	0.972573	0.797334	0.896752	0.441738	0.501976	0.649903
Zfp638	0.753852	0.707939	1.00992	0.833041	1.17198	1.07916	0.58581	0.691834	0.659199	0.466259	0.863837
Cs	0.994293	1.04855	1.00975	0.776173	0.700915	0.772559	1.13659	1.14341	0.560666	0.870982	1.91759
Cfap20	1.09828	0.911914	1.00953	1.26549	1.35368	1.16827	0.937029	0.95956	0.695317	1.00105	0.978834
Tmem35a	0.104587	0.206294	1.00881	0.0331304	1.69782	0.943707	0.0689186	0.185806	0.0712944	0.00706464	0.0910284
Tmem151a	0.574172	0.382594	1.00862	0.272445	0.611873	0.458568	0.352506	0.310795	0.0814619	0.11613	0.0895054
H2afj	1.06314	1.20455	1.00777	0.769291	0.910058	0.787122	1.24871	1.36941	1.38937	1.37169	1.58608
Eml5	0.428038	0.4485	1.00771	0.407556	0.599386	0.367393	0.16694	0.269296	0.0913445	0.102871	0.177259
Tceal8	1.49005	1.58494	1.00714	1.61499	1.24219	1.25913	1.92036	1.4475	0.792533	2.66322	1.80107
Eprs	0.776026	0.775312	1.00698	0.613775	0.887434	0.667892	0.658906	0.84768	0.798373	0.997074	1.34222
Pcsk2	0.765012	0.661358	1.00682	0.951856	0.274192	0.193194	0.164174	1.06517	0.0813655	0.0931086	0.055605
Agpat4	0.9205	0.901954	1.00623	0.987537	1.1751	0.937409	0.664559	0.69215	0.144139	0.659302	0.254345
Smc6	1.12844	0.8877	1.00536	1.27739	1.18199	1.06358	1.10622	1.08694	0.78685	0.961636	0.770019
Uhrf2	0.69192	0.701237	1.00504	0.824534	0.751637	0.816906	0.417136	0.877904	0.612213	0.624448	0.605885
Ablim3	0.499743	0.505514	1.00425	0.29995	0.494194	0.460772	0.622216	0.610816	0.070246	0.0408691	0.0429239
Mrps18a	1.20943	1.21463	1.0029	1.22897	1.09144	1.10761	1.29157	1.16694	0.651988	1.11635	0.934762
Fam168b	0.802016	0.835804	1.00224	0.719929	0.588356	0.783104	0.898686	1.17291	0.673571	0.544874	0.63913
Slc48a1	0.75874	0.638638	1.0017	0.766313	0.731932	0.763093	0.706056	0.643977	0.666339	0.988336	1.20958
Mboat7	0.819597	0.638216	1.00166	0.727754	1.09361	0.912183	0.510758	0.486544	0.606697	0.414301	0.675047
Hist3h2a	0.848949	1.55045	1.00144	1.35492	0.398471	0.707102	1.28239	3.13703	0.507794	0.755995	0.524889
Gria3	0.177669	0.188257	1.00126	0.101305	0.330535	0.278353	0.0743927	0.16003	0.0535465	0.0578694	0.0792059
Vezt	0.607897	0.699112	1.00123	0.556561	0.610899	0.635807	0.605514	0.940793	0.208927	0.55841	0.696906
Atad1	1.10476	1.14956	1.00043	1.21048	1.33697	1.07425	1.1721	1.17914	0.500367	0.516954	1.39324
Med30	1.01682	1.05058	0.999744	0.800344	1.11704	1.33116	0.835306	0.952145	0.795974	0.448971	0.602603
Fopnl	1.06934	1.09242	0.999713	1.02807	0.818604	1.09623	1.06091	1.16848	0.436186	0.72677	0.583933
Klhl1	0.0420703	0.17027	0.999571	0.053759	0.169294	0.104024	0.0236066	0.36738	0.0297696	0.0118443	0.0294476
Chmp1a	1.04441	1.07486	0.999422	0.948404	0.78656	0.968731	1.21447	1.27383	0.930743	0.877347	0.602838
Fam3c	0.477513	0.401055	0.999151	0.243947	0.45304	0.347226	0.220744	0.481484	0.458902	0.46391	0.696008
Trip12	0.674085	0.614181	0.999126	0.805623	0.762428	0.739977	0.37624	0.476922	0.649292	0.700729	0.913175
Foxn3	0.669662	0.634978	0.99861	0.595079	0.789796	0.488228	0.527429	0.652187	1.85184	0.430789	0.900756
Elmod1	0.29688	0.388785	0.997261	0.368262	0.635936	0.668295	0.142246	0.510615	0.0931867	0.0243881	0.0921177
Wbp4	0.993372	0.941355	0.997068	1.09902	1.00621	0.962689	0.867013	1.06056	0.715934	0.632539	0.830444
Maea	1.11932	1.30755	0.99689	1.07832	1.1586	1.12284	1.02255	1.27347	0.813914	0.975807	0.715791
Anp32a	1.44711	1.39896	0.995876	1.62261	1.75811	1.56726	2.66583	1.16486	2.24131	3.149	0.938784
Fbxw2	1.00655	0.814839	0.995741	0.898574	0.945413	1.08055	0.907471	0.782555	0.661856	0.609703	0.627124
Gdap1	0.86613	0.778548	0.995691	0.751333	1.1012	1.02786	0.61985	0.846623	0.108126	0.0759463	0.150669
Mafg	0.67104	0.60502	0.995522	0.573796	0.583905	0.610892	0.586981	0.63929	0.876728	0.314172	0.688558
B4galt6	0.950861	0.703141	0.994785	0.679843	0.806326	0.731659	0.545058	0.503462	0.485062	0.229365	0.477792
Psmd14	1.28394	1.43202	0.994784	1.34184	1.21462	1.38445	1.40901	1.43725	0.805664	0.886255	0.8835
Rbm8a	1.28971	1.39342	0.99465	1.64704	1.18629	1.3104	1.56788	1.35369	0.920347	1.34645	0.815265
Grid2	0.327348	0.242777	0.994386	0.247262	0.426557	0.409977	0.316687	0.279594	0.0521827	0.0119433	1.01474
Ggnbp2	0.883373	0.881849	0.99436	0.76575	0.849808	0.769105	0.758334	0.856323	0.790791	0.999783	1.01013
Rock2	0.600612	0.433137	0.993972	0.378479	0.928739	0.396477	0.297392	0.310812	0.952871	0.374346	0.593258
Gabra2	0.265243	0.476284	0.99357	0.323942	0.448386	0.57414	0.123609	0.479894	0.0577433	0.0320338	0.477466
Ago2	1.20546	0.776057	0.993061	1.18735	1.46905	1.06784	0.609972	0.544246	0.466163	0.593919	0.725068
Hsdl1	0.77906	0.9379	0.992772	0.771652	0.786581	0.739825	1.13608	0.931939	0.329373	0.352476	0.196768
Erc1	0.615218	0.615137	0.992514	0.49655	0.690014	0.672581	0.583381	0.573058	0.100818	0.304465	0.254642
Lhfpl4	0.639127	0.692884	0.992141	0.751478	0.740366	0.641161	0.779651	0.777943	0.106605	0.0767678	0.207188
Pcm1	0.899981	0.905722	0.990621	1.01504	1.4736	1.29903	0.622735	0.765346	0.555323	0.540239	0.936002
Rbbp7	1.36127	1.207	0.99046	1.22465	1.41228	1.16429	1.01207	0.970399	1.17444	1.75158	0.964477
Plppr1	0.195653	0.936288	0.989696	0.2756	0.266077	0.608886	0.499835	1.2589	0.0453389	0.0983741	0.0428846
Fam131c	0.455939	0.337879	0.989656	0.183622	0.340395	0.449429	1.20822	0.466737	0.033857	0.0348902	0.0425846
Bhlhb9	1.244	1.08889	0.989434	1.58266	1.11839	1.15751	1.44721	1.40217	0.290586	0.695608	0.460235
Dnajc6	0.629306	0.521253	0.989332	0.399312	0.612063	0.591205	0.413651	0.456441	0.128735	0.277857	0.184804
Ppp2r2a	0.934553	0.938106	0.987896	0.819156	0.905576	0.818556	0.887195	0.954275	0.620112	0.793625	0.668828
Tmem126a	1.0002	0.975349	0.987249	0.951057	0.97147	1.01138	0.694491	0.737854	0.501889	0.840862	0.694756
Txndc9	1.14652	1.36213	0.987097	1.32627	1.19824	1.39772	1.23072	1.37273	0.785517	1.47287	0.977244
Naa20	0.860784	0.78156	0.986532	0.775219	0.853997	0.83786	0.849103	0.682037	1.07356	0.885261	1.04814
Adgrb2	0.363285	0.29624	0.986474	0.301416	0.514117	0.346174	0.328544	0.320282	0.121939	0.0702004	1.90771
Dctn6	1.11156	0.981483	0.985989	0.917214	1.11084	1.06581	1.05699	0.821552	0.541088	0.591044	0.65984
Aktip	0.899949	0.839209	0.985289	0.883142	0.87641	0.812655	0.862643	1.07221	0.293766	0.501436	0.474444
Hsd17b12	0.762967	0.797695	0.985132	0.634635	0.865098	0.534852	0.831981	0.864913	0.836476	0.526046	2.81277
Nipsnap1	0.991162	1.17083	0.985007	0.973879	0.896459	0.995802	1.28966	1.41649	0.0986874	0.286924	0.139013
Mcrip1	0.877249	0.546308	0.984829	0.243014	0.938134	0.834666	0.139102	0.334596	1.51769	0.136494	1.32658
Lasp1	1.02053	0.965144	0.984699	0.998014	1.0591	1.12745	1.04481	0.785235	0.853314	0.718707	0.963024
Pacsin1	0.530645	0.359009	0.984634	0.407178	0.436133	0.336293	0.204928	0.423811	0.372466	0.0258613	0.199224
[truncated: 22,635 more rows]
[truncated: 3 more columns]
