# Supplementary material for: Developmental single-cell transcriptomics of hypothalamic POMC neurons reveal the genetic trajectories of multiple neuropeptidergic phenotypes
Source: eLife. 2022 Jan 19;11:e72883. doi: 10.7554/eLife.72883 (PMC8806186; doi:10.7554/eLife.72883)
Supplement: Figure 1—source data 2. [file elife-72883-fig1-data2.xlsx]

## Sheet: Cluster 1
Figure 1-source data 2. Feature genes that define each of the 11 Pomc clusters
integrated across all six developmental stages.
The data are sorted from highest to lowest for each integrated custer by average log fold-change > 0.25
(avg_logFC) of gene expression in the featured cluster relative to all other clusters
pct.1, Percentage of cells in the indicated cluster with significant differential gene expression
pct.2, Percentage of cells in all other clusters with significant differential gene expression
p-val, p-value
p_val_adj, adjusted p-value for multiple comparisons
The Wilcoxon test was performed to identify the differentially expressed genes in each cluster
Gene	p_val	avg_logFC	pct.1	pct.2	p_val_adj	cluster
Pomc	0	1.97682	1	1	0	1
Six3	0	0.988422	0.951	0.294	0	1
Calb1	0	0.818464	0.722	0.32	0	1
S100a10	0	0.816766	0.765	0.397	0	1
Six6	0	0.79953	0.825	0.239	0	1
Isl1	0	0.774871	0.955	0.333	0	1
Nkx2-1	0	0.736358	0.944	0.436	0	1
Chchd10	0	0.709718	0.891	0.486	0	1
Cpne4	0	0.642658	0.657	0.192	0	1
Peg3	0	0.6369	0.98	0.769	0	1
Prdm12	0	0.615317	0.709	0.06	0	1
Arhgdig	0	0.598775	0.842	0.498	0	1
Mpped2	0	0.595555	0.956	0.589	0	1
Bex3	5.76572e-57	0.57987	0.477	0.487	1.87115e-52	1
Cbarp	2.7916e-306	0.571011	0.916	0.707	9.05957e-302	1
Syt4	0	0.556655	0.922	0.601	0	1
Tspan17	0	0.556166	0.782	0.392	0	1
Tmeff2	0	0.553328	0.86	0.473	0	1
Fxyd6	0	0.546678	0.994	0.83	0	1
Car10	4.81466e-286	0.528439	0.601	0.351	1.5625e-281	1
Tle4	0	0.516495	0.905	0.541	0	1
Stmn2	0	0.512999	1	0.866	0	1
Selenow	4.83197e-35	0.497594	0.477	0.528	1.56812e-30	1
Bex2	0	0.487299	0.999	0.915	0	1
Pcsk1n	0	0.483088	0.998	0.94	0	1
Nap1l5	1.78747e-121	0.474183	0.929	0.846	5.80089e-117	1
Rnf128	0	0.472541	0.559	0.189	0	1
Pfn2	0	0.472321	0.996	0.842	0	1
Ly6h	3.53218e-261	0.465768	0.993	0.866	1.1463e-256	1
Camk2n2	3.1059e-185	0.45623	0.714	0.524	1.00796e-180	1
Sncb	1.51924e-163	0.452623	0.627	0.458	4.93038e-159	1
Snrpn	0	0.450389	0.995	0.848	0	1
Mif	0	0.438683	0.996	0.921	0	1
Ttc3	0	0.435723	0.999	0.935	0	1
Ncald	3.98012e-227	0.434611	0.741	0.51	1.29167e-222	1
Stmn3	0	0.43234	0.999	0.863	0	1
Elavl4	0	0.432179	0.979	0.723	0	1
Rac3	0	0.432164	0.953	0.759	0	1
Serp2	0	0.427511	0.919	0.688	0	1
Nenf	3.64393e-236	0.426322	0.947	0.841	1.18257e-231	1
Vat1	0	0.424661	0.893	0.688	0	1
Bex1	0	0.420487	0.981	0.764	0	1
Gng3	0	0.419074	0.986	0.81	0	1
Nell2	0	0.41492	0.786	0.436	0	1
Nnat	7.7863e-176	0.413065	1	0.937	2.52689e-171	1
Vat1l	0	0.410963	0.87	0.514	0	1
Rasgrf2	0	0.407644	0.554	0.251	0	1
Islr2	6.59127e-241	0.407005	0.528	0.236	2.13906e-236	1
Fxyd7	8.95991e-198	0.40616	0.709	0.493	2.90776e-193	1
Vstm2l	8.85086e-230	0.401849	0.583	0.344	2.87237e-225	1
Resp18	7.21107e-95	0.400301	0.819	0.718	2.34021e-90	1
Ppp1r1a	0	0.400248	0.915	0.6	0	1
Mllt11	4.88058e-305	0.396717	0.998	0.822	1.58389e-300	1
Rab3a	0	0.395725	0.977	0.784	0	1
Gap43	0	0.394073	0.993	0.879	0	1
Dpysl2	0	0.393489	0.997	0.955	0	1
Nop10	0	0.390813	0.975	0.86	0	1
Fabp5	0	0.389747	0.997	0.9	0	1
Caly	2.68676e-127	0.387577	0.809	0.669	8.71936e-123	1
Tox2	0	0.387485	0.888	0.466	0	1
Gpx3	3.69203e-121	0.38497	0.653	0.513	1.19818e-116	1
Pea15a	0	0.38394	0.962	0.783	0	1
Vgf	2.90761e-140	0.380587	0.523	0.329	9.43606e-136	1
Sox3	0	0.38016	0.59	0.18	0	1
Ahi1	9.2284e-152	0.377825	0.912	0.772	2.99489e-147	1
Syp	1.09875e-221	0.376294	0.844	0.627	3.56577e-217	1
Nptx2	0	0.375936	0.562	0.215	0	1
Rpl22l1	0	0.374834	0.997	0.97	0	1
Mapt	4.62181e-261	0.365293	0.99	0.771	1.49992e-256	1
Gabarapl1	0	0.364973	0.939	0.724	0	1
Fkbp1a	0	0.364748	0.991	0.923	0	1
Atp1b1	2.694e-134	0.364379	0.87	0.733	8.74283e-130	1
Bex4	0	0.362828	0.955	0.693	0	1
Thsd4	0	0.362188	0.503	0.089	0	1
Cd44	0	0.361367	0.385	0.06	0	1
Pcbd1	1.65727e-288	0.360617	0.833	0.535	5.37835e-284	1
Nr5a1	0	0.359666	0.323	0.032	0	1
Shisa8	0	0.354694	0.317	0.072	0	1
Calm3	0	0.354532	0.998	0.961	0	1
Calm1	0	0.354185	0.998	0.986	0	1
Tceal3	9.77354e-231	0.347346	0.79	0.528	3.17181e-226	1
Nbdy	2.71673e-56	0.344408	0.471	0.423	8.81659e-52	1
Sms	1.55363e-296	0.342976	0.97	0.759	5.04199e-292	1
Prox1	0	0.34294	0.613	0.193	0	1
Thra	9.90706e-272	0.342922	0.979	0.816	3.21514e-267	1
Atp6v0e2	5.23892e-251	0.342796	0.896	0.659	1.70019e-246	1
Npdc1	0	0.342696	0.972	0.749	0	1
Rab6a	0	0.342585	0.981	0.84	0	1
Prkce	0	0.341	0.754	0.421	0	1
Sepw1	3.9436e-53	0.340795	0.522	0.438	1.27982e-48	1
Khdrbs3	3.12172e-206	0.339687	0.774	0.508	1.01309e-201	1
Gnao1	1.68765e-264	0.33951	0.921	0.687	5.47693e-260	1
Igfbp5	0	0.33786	0.69	0.303	0	1
Ywhaz	0	0.337139	0.984	0.907	0	1
Gnb1	5.51882e-240	0.334741	0.997	0.961	1.79102e-235	1
Uchl1	6.43514e-218	0.334566	0.996	0.877	2.0884e-213	1
Vamp2	3.84254e-212	0.333698	0.955	0.808	1.24702e-207	1
2900011O08Rik	8.36763e-287	0.329851	0.846	0.564	2.71555e-282	1
Tbx3	8.36171e-180	0.329784	0.679	0.423	2.71362e-175	1
Map1b	2.825e-240	0.327097	0.999	0.857	9.16797e-236	1
Mtch1	0	0.326982	0.989	0.965	0	1
Prox1os	0	0.326415	0.5	0.087	0	1
Syt11	1.74345e-241	0.324049	0.941	0.718	5.65803e-237	1
Acot7	2.54228e-288	0.3238	0.93	0.68	8.25047e-284	1
Ywhah	2.57831e-283	0.32352	0.991	0.968	8.36737e-279	1
Ndn	1.01858e-37	0.322076	0.794	0.77	3.30561e-33	1
Tagln2	2.95943e-160	0.321988	0.457	0.231	9.60423e-156	1
Ncam1	9.70807e-194	0.321635	0.994	0.824	3.15056e-189	1
H2-Ab1	0	0.320908	0.23	0.024	0	1
Stxbp1	1.21634e-228	0.320362	0.902	0.686	3.9474e-224	1
Morf4l2	0	0.318684	0.993	0.891	0	1
Atp6v1g2	6.93043e-184	0.315672	0.726	0.5	2.24913e-179	1
Rtl8a	6.1091e-65	0.313536	0.473	0.384	1.98259e-60	1
Eef1g	7.6567e-139	0.31343	0.998	0.96	2.48483e-134	1
Tenm1	2.96611e-223	0.313391	0.515	0.264	9.62593e-219	1
Fkbp3	1.21497e-252	0.310931	0.967	0.848	3.94293e-248	1
Xpr1	3.32645e-260	0.310534	0.934	0.675	1.07953e-255	1
D930028M14Rik	6.61683e-116	0.31052	0.352	0.171	2.14736e-111	1
Snap25	1.38573e-217	0.310191	0.905	0.673	4.4971e-213	1
Calm2	0	0.309449	1	0.994	0	1
Sult4a1	1.23593e-215	0.309314	0.724	0.466	4.01098e-211	1
Shtn1	0	0.308151	0.697	0.321	0	1
Ywhag	7.92896e-277	0.307167	0.989	0.876	2.57319e-272	1
Pten	2.32488e-149	0.306513	0.85	0.735	7.54494e-145	1
Ptprn	1.02685e-166	0.305439	0.702	0.474	3.33245e-162	1
Cfl2	3.82509e-300	0.305375	0.983	0.794	1.24136e-295	1
Impact	8.28993e-42	0.304316	0.634	0.558	2.69033e-37	1
Usmg5	1.11528e-304	0.304151	0.996	0.922	3.61941e-300	1
Nrsn2	1.18373e-184	0.303949	0.782	0.52	3.84157e-180	1
Sox1	0	0.303642	0.776	0.333	0	1
Ndrg4	8.61632e-153	0.301394	0.803	0.622	2.79626e-148	1
Dlk1	0	0.301172	0.791	0.406	0	1
Guk1	6.64914e-278	0.299914	0.917	0.715	2.15785e-273	1
Crmp1	9.04725e-209	0.29948	0.983	0.73	2.9361e-204	1
Nrgn	6.93054e-172	0.29941	0.424	0.202	2.24917e-167	1
Vim	6.22748e-92	0.299221	0.685	0.496	2.021e-87	1
Hbb-y	2.53615e-27	0.298081	0.356	0.271	8.23057e-23	1
Mapk8ip1	9.18572e-274	0.296961	0.944	0.699	2.98104e-269	1
Hint1	0	0.296679	0.998	0.985	0	1
Usp29	1.60017e-287	0.295881	0.868	0.546	5.19303e-283	1
Rab3b	0	0.295067	0.755	0.406	0	1
Hmgb3	3.81594e-137	0.293344	0.985	0.765	1.23839e-132	1
1500011B03Rik	3.50105e-268	0.293074	0.923	0.653	1.13619e-263	1
Rtn1	4.966e-130	0.292113	1	0.924	1.61162e-125	1
Atp5g1	1.05275e-257	0.290842	0.992	0.957	3.4165e-253	1
Rala	1.30567e-203	0.289163	0.944	0.78	4.2373e-199	1
Tmeff1	1.58999e-133	0.289087	0.881	0.625	5.15998e-129	1
Sox2	0	0.288998	0.769	0.3	0	1
Tmsb10	2.84864e-136	0.288517	1	0.985	9.24469e-132	1
Prkar1b	3.41817e-187	0.288452	0.821	0.609	1.1093e-182	1
Zim1	0	0.288021	0.621	0.237	0	1
Map1lc3a	2.10302e-205	0.287707	0.988	0.937	6.82494e-201	1
Pde10a	3.80142e-248	0.287276	0.637	0.335	1.23367e-243	1
Klc1	8.66434e-241	0.286638	0.983	0.81	2.81184e-236	1
Gm1673	8.25873e-197	0.28567	0.998	0.893	2.6802e-192	1
Tceal9	1.21095e-38	0.285388	0.475	0.442	3.92989e-34	1
Nme1	1.04413e-225	0.284848	0.996	0.931	3.38852e-221	1
Tppp3	5.58814e-250	0.282929	0.824	0.539	1.81352e-245	1
Slc25a4	1.93849e-298	0.28274	0.999	0.98	6.29099e-294	1
Hap1	1.47958e-157	0.28264	0.931	0.743	4.80167e-153	1
Map4	2.17099e-211	0.282441	0.838	0.632	7.04551e-207	1
Syngr3	1.90288e-207	0.281588	0.762	0.497	6.17541e-203	1
Pebp1	2.5557e-286	0.280559	0.998	0.975	8.29401e-282	1
Cda	0	0.27961	0.468	0.133	0	1
Zwint	7.99612e-192	0.278998	0.985	0.914	2.59498e-187	1
Dbpht2	1.29934e-218	0.278205	0.564	0.299	4.21674e-214	1
Gabrg3	5.97603e-252	0.276889	0.499	0.232	1.9394e-247	1
Arl2bp	1.5738e-232	0.276382	0.938	0.739	5.10746e-228	1
Cend1	1.96574e-260	0.27625	0.802	0.494	6.37941e-256	1
Hsbp1	1.23328e-269	0.27623	0.992	0.964	4.00237e-265	1
Cox6a1	1.17632e-175	0.275316	0.991	0.91	3.81751e-171	1
Kif5c	1.64472e-194	0.275162	0.973	0.705	5.3376e-190	1
Dda1	2.30651e-262	0.275038	0.943	0.769	7.48531e-258	1
1110065P20Rik	3.75508e-241	0.273387	0.881	0.662	1.21863e-236	1
Rit2	1.03588e-124	0.27308	0.687	0.508	3.36174e-120	1
Nkain3	4.77672e-303	0.271811	0.513	0.202	1.55019e-298	1
Tma7	0	0.271763	0.994	0.95	0	1
Fabp3	8.45495e-162	0.270895	0.809	0.569	2.74389e-157	1
Cgref1	9.08868e-281	0.270819	0.712	0.386	2.94955e-276	1
Kif1a	1.70982e-195	0.270255	0.855	0.614	5.54887e-191	1
Prmt2	1.51896e-219	0.269722	0.974	0.766	4.92947e-215	1
Sub1	7.47034e-294	0.269631	0.997	0.971	2.42435e-289	1
Mt3	5.81344e-243	0.269137	0.755	0.502	1.88664e-238	1
L1cam	1.92827e-241	0.268654	0.862	0.555	6.25782e-237	1
Rufy3	8.24161e-209	0.268483	0.987	0.764	2.67465e-204	1
Coro1c	2.23251e-176	0.268426	0.857	0.61	7.24516e-172	1
Rtl8b	3.32655e-84	0.268371	0.466	0.338	1.07956e-79	1
Aprt	7.54864e-226	0.26822	0.918	0.732	2.44976e-221	1
Gnai1	1.84915e-183	0.268121	0.701	0.449	6.00103e-179	1
Tubb2b	1.45593e-143	0.267385	1	0.951	4.72495e-139	1
Hs6st2	6.15103e-181	0.26705	0.601	0.349	1.99619e-176	1
Ndufv3	1.61673e-263	0.266635	0.978	0.895	5.24676e-259	1
Hmgcr	6.6142e-203	0.266066	0.875	0.63	2.14651e-198	1
Hmgcs1	4.83976e-213	0.265988	0.94	0.753	1.57065e-208	1
Rab6b	1.60687e-189	0.265911	0.909	0.706	5.21479e-185	1
Nkx2-4	6.14417e-294	0.265744	0.355	0.097	1.99397e-289	1
Ass1	1.98947e-292	0.265153	0.557	0.239	6.45642e-288	1
Hpcal1	1.77599e-191	0.264479	0.733	0.478	5.76364e-187	1
Tubb5	1.63001e-124	0.264238	1	0.988	5.28988e-120	1
Tubb2a	2.99478e-85	0.262684	0.983	0.968	9.71897e-81	1
Fxyd2	7.60991e-243	0.262508	0.522	0.241	2.46965e-238	1
Spint2	1.68317e-119	0.262326	0.706	0.481	5.4624e-115	1
Robo2	1.41097e-181	0.26166	0.52	0.274	4.57902e-177	1
Tmem246	1.22986e-197	0.260973	0.788	0.536	3.99125e-193	1
Fdps	2.05559e-143	0.259851	0.904	0.7	6.671e-139	1
Synpr	5.36374e-205	0.259825	0.4	0.169	1.7407e-200	1
Trappc4	1.14439e-236	0.259298	0.967	0.819	3.7139e-232	1
Tubb3	1.39998e-172	0.259207	1	0.873	4.54335e-168	1
Ube2m	4.86152e-101	0.258689	0.893	0.816	1.57771e-96	1
Tomm20	2.69025e-291	0.258659	0.993	0.952	8.73065e-287	1
Tro	2.84763e-208	0.258418	0.775	0.494	9.24141e-204	1
Tmem130	1.39936e-97	0.258264	0.745	0.595	4.54134e-93	1
Cnrip1	3.59982e-210	0.257508	0.895	0.664	1.16825e-205	1
Magel2	4.11399e-265	0.25588	0.802	0.431	1.33511e-260	1
Araf	1.04906e-162	0.255631	0.932	0.777	3.40452e-158	1
Slc25a5	7.83265e-06	0.255381	0.956	0.9	0.254193	1
Fam159b	0	0.254759	0.339	0.068	0	1
Prkaca	1.2918e-203	0.254571	0.928	0.744	4.19226e-199	1
Elavl3	2.4775e-137	0.254549	0.988	0.729	8.04023e-133	1
Pkib	5.84408e-215	0.254278	0.476	0.219	1.89658e-210	1
Tmem179	1.05294e-199	0.254277	0.71	0.448	3.41711e-195	1
Rgs17	4.57773e-194	0.25415	0.748	0.479	1.48561e-189	1
Dynlrb1	1.12852e-217	0.25384	0.994	0.917	3.6624e-213	1
Asb4	4.28192e-124	0.253352	0.608	0.381	1.38961e-119	1
Nsg1	1.13797e-147	0.253048	0.996	0.813	3.69305e-143	1
Gsk3b	5.25304e-202	0.252967	0.992	0.93	1.70477e-197	1
B230209E15Rik	1.20871e-104	0.252965	0.462	0.292	3.92262e-100	1
Fam96b	7.11736e-232	0.252951	0.932	0.749	2.3098e-227	1
6330403K07Rik	1.98196e-141	0.252873	0.996	0.865	6.43206e-137	1
Trappc6b	6.07957e-209	0.252851	0.949	0.829	1.973e-204	1
Ttc9b	2.2081e-166	0.252841	0.893	0.664	7.16594e-162	1
Sfxn1	2.49039e-217	0.252772	0.911	0.683	8.08208e-213	1
Zcchc18	1.54068e-113	0.252381	0.871	0.706	4.99996e-109	1
1500009C09Rik	4.85791e-273	0.252172	0.736	0.395	1.57654e-268	1
Cnr1	1.90497e-253	0.252116	0.529	0.226	6.18219e-249	1
Grb10	9.97765e-261	0.251765	0.718	0.394	3.23805e-256	1
Ehd3	9.85652e-287	0.250818	0.494	0.197	3.19874e-282	1
Lmo3	2.06809e-119	0.250302	0.533	0.297	6.71158e-115	1

## Sheet: Cluster 2
Figure 1-source data 2. Feature genes that define each of the 11 Pomc clusters
integrated across all six developmental stages.
The data are sorted from highest to lowest for each integrated custer by average log fold-change > 0.25
(avg_logFC) of gene expression in the featured cluster relative to all other clusters
pct.1, Percentage of cells in the indicated cluster with significant differential gene expression
pct.2, Percentage of cells in all other clusters with significant differential gene expression
p-val, p-value
p_val_adj, adjusted p-value for multiple comparisons
The Wilcoxon test was performed to identify the differentially expressed genes in each cluster
Gene	p_val	avg_logFC	pct.1	pct.2	p_val_adj	cluster
Crabp1	5.2886e-135	1.98662	0.238	0.073	1.71631e-130	2
Ebf1	0	1.55524	0.524	0.083	0	2
Sncg	0	1.48587	0.454	0.129	0	2
Nefm	7.02587e-305	1.42218	0.649	0.299	2.28011e-300	2
Nefl	0	1.28648	0.888	0.539	0	2
Crabp2	6.97618e-256	1.28379	0.439	0.149	2.26398e-251	2
Onecut2	0	1.10056	0.536	0.15	0	2
Pou4f1	0	1.06202	0.344	0.027	0	2
Tcf7l2	4.95157e-82	1.03435	0.536	0.382	1.60693e-77	2
Ina	1.26738e-290	0.998612	0.971	0.739	4.11302e-286	2
Lhx9	0	0.93011	0.329	0.027	0	2
D930028M14Rik	9.30322e-286	0.895088	0.51	0.179	3.01917e-281	2
Irx2	0	0.893077	0.408	0.037	0	2
Cbln2	4.73802e-138	0.874021	0.392	0.182	1.53763e-133	2
Necab2	1.00422e-87	0.860476	0.658	0.449	3.259e-83	2
Hbb-y	4.60651e-187	0.829916	0.547	0.254	1.49495e-182	2
Nr4a2	2.67145e-180	0.784982	0.443	0.186	8.66965e-176	2
Tuba1a	1.78845e-304	0.762683	1	0.992	5.80407e-300	2
Mab21l2	0	0.760989	0.374	0.029	0	2
Cd24a	4.37391e-212	0.753277	0.778	0.491	1.41946e-207	2
Nrn1	0	0.745827	0.445	0.106	0	2
Meis2	1.14973e-204	0.735742	0.17	0.023	3.73121e-200	2
Zic1	1.04513e-278	0.734367	0.342	0.075	3.39177e-274	2
Olfm1	2.35088e-223	0.668876	0.861	0.598	7.62931e-219	2
Tubb3	0	0.666356	0.998	0.899	0	2
Cartpt	1.32004e-135	0.653602	0.311	0.112	4.28394e-131	2
Islr2	2.71443e-174	0.650121	0.568	0.288	8.80913e-170	2
Gng8	0	0.646829	0.246	0.026	0	2
Ddah2	7.41878e-197	0.646683	0.923	0.753	2.40762e-192	2
Igfbpl1	1.94026e-132	0.622064	0.497	0.255	6.29673e-128	2
Tspan13	2.53145e-181	0.619325	0.984	0.827	8.21532e-177	2
Nwd2	7.8141e-121	0.606551	0.321	0.135	2.53591e-116	2
Nhlh2	6.43197e-141	0.596345	0.749	0.531	2.08737e-136	2
Mir124-2hg	0	0.58905	0.515	0.111	0	2
Map1b	1.02587e-280	0.581267	0.999	0.886	3.32927e-276	2
Tubb2b	9.30339e-270	0.542704	1	0.961	3.01923e-265	2
Pou6f2	0	0.539532	0.471	0.123	0	2
Gap43	7.07413e-283	0.526786	0.997	0.902	2.29577e-278	2
Elavl4	3.07315e-214	0.526158	0.978	0.775	9.97328e-210	2
Hba-a1	8.49119e-171	0.522908	0.517	0.233	2.75565e-166	2
Irx1	0	0.510476	0.343	0.035	0	2
Tagln3	3.38143e-194	0.497733	0.984	0.777	1.09737e-189	2
Atp5o	1.14313e-156	0.49277	0.676	0.402	3.7098e-152	2
Hba-x	5.61786e-156	0.488903	0.362	0.131	1.82316e-151	2
Kitl	7.90418e-104	0.483494	0.225	0.079	2.56514e-99	2
Actg1	5.44282e-261	0.478969	1	0.999	1.76636e-256	2
Dcx	1.31056e-244	0.473795	0.952	0.654	4.25315e-240	2
Dpysl3	2.00978e-236	0.472738	0.984	0.765	6.52235e-232	2
Sepw1	1.2057e-116	0.472462	0.682	0.427	3.91287e-112	2
Hist3h2ba	1.91313e-173	0.470275	0.958	0.724	6.20869e-169	2
Ube2e3	5.2446e-197	0.466662	0.98	0.908	1.70203e-192	2
Hbb-bh1	7.82406e-132	0.464214	0.275	0.089	2.53914e-127	2
Irs4	0.00147933	0.4639	0.367	0.408	1	2
Cacnb3	2.24806e-205	0.461077	0.883	0.598	7.29562e-201	2
Dmrtb1	1.10058e-283	0.460675	0.362	0.085	3.5717e-279	2
Cnn3	1.03722e-144	0.458237	0.581	0.328	3.36608e-140	2
Trp53i11	3.70494e-122	0.45677	0.628	0.396	1.20236e-117	2
Crmp1	2.48816e-228	0.456608	0.987	0.78	8.07481e-224	2
Sox11	6.08109e-166	0.451661	0.967	0.705	1.9735e-161	2
Tubb5	4.80787e-231	0.449444	1	0.991	1.5603e-226	2
Hn1	2.1301e-103	0.442288	0.683	0.426	6.91282e-99	2
Stmn2	1.6082e-200	0.44204	0.999	0.894	5.21909e-196	2
Pcp4	1.52478e-07	0.437863	0.651	0.615	0.00494836	2
Runx1t1	7.22022e-218	0.437269	0.86	0.548	2.34318e-213	2
Tubb4a	5.66926e-228	0.429436	0.935	0.677	1.83984e-223	2
Plppr1	2.9247e-298	0.427028	0.626	0.248	9.49152e-294	2
Tmem35	1.33235e-179	0.426285	0.464	0.183	4.32389e-175	2
Tppp3	1.85622e-92	0.425001	0.805	0.601	6.02398e-88	2
Bzw2	1.35789e-210	0.421884	0.937	0.722	4.40676e-206	2
Stmn1	1.5673e-229	0.421262	1	0.981	5.08635e-225	2
Mllt11	5.96927e-239	0.420165	0.997	0.858	1.93721e-234	2
Hba-a2	1.16992e-164	0.419972	0.481	0.206	3.79673e-160	2
Tmeff1	1.31085e-203	0.414271	0.945	0.665	4.25412e-199	2
Nrep	4.03622e-208	0.408581	0.858	0.533	1.30987e-203	2
Ube2d1	5.18899e-203	0.407525	0.922	0.692	1.68398e-198	2
Selk	7.59039e-118	0.404303	0.682	0.421	2.46331e-113	2
Atat1	1.93534e-197	0.403936	0.912	0.664	6.28076e-193	2
Klc1	5.50358e-225	0.402561	0.986	0.845	1.78608e-220	2
Idh1	1.77651e-170	0.398719	0.931	0.753	5.7653e-166	2
Lhx1os	6.32242e-147	0.392462	0.112	0.013	2.05181e-142	2
Serf1	2.00512e-186	0.388966	0.988	0.812	6.50723e-182	2
Cited2	8.42777e-119	0.387033	0.83	0.628	2.73506e-114	2
Gdi1	4.67954e-183	0.386026	0.979	0.843	1.51865e-178	2
Acat2	2.77496e-186	0.381103	0.908	0.649	9.00559e-182	2
Stmn4	6.24423e-159	0.380821	0.968	0.766	2.02644e-154	2
Tmem163	2.27798e-162	0.380689	0.619	0.326	7.39273e-158	2
Zic4	6.81692e-172	0.378849	0.223	0.05	2.2123e-167	2
Syt1	1.28153e-138	0.37782	0.811	0.526	4.15896e-134	2
Thsd7a	1.32029e-195	0.376691	0.481	0.203	4.28472e-191	2
Id4	2.15608e-96	0.374825	0.482	0.276	6.99714e-92	2
Pantr1	5.26352e-301	0.372229	0.355	0.074	1.70817e-296	2
Nt5dc2	5.45641e-149	0.370286	0.794	0.541	1.77077e-144	2
Fam57b	1.60121e-191	0.366987	0.901	0.592	5.19639e-187	2
Hmgcs1	6.86433e-141	0.361802	0.949	0.79	2.22768e-136	2
Tsc22d1	2.93977e-218	0.35975	0.997	0.872	9.54044e-214	2
Sbk1	1.56897e-167	0.358536	0.911	0.625	5.09179e-163	2
Fdft1	1.42148e-123	0.356133	0.867	0.654	4.61314e-119	2
Vstm2b	1.11326e-143	0.355689	0.536	0.28	3.61286e-139	2
Cnih2	9.24401e-167	0.355496	0.994	0.799	2.99996e-162	2
Pafah1b3	7.18927e-182	0.353001	0.992	0.855	2.33313e-177	2
Elavl3	8.87163e-188	0.349854	0.992	0.781	2.87911e-183	2
Nr2f1	1.83132e-89	0.346662	0.277	0.115	5.94319e-85	2
Clmp	7.67596e-160	0.346187	0.719	0.439	2.49108e-155	2
Prdx2	2.17412e-167	0.340782	0.999	0.968	7.05567e-163	2
Tceb2	7.4534e-75	0.340756	0.683	0.426	2.41885e-70	2
Chst2	4.11761e-156	0.339056	0.593	0.296	1.33629e-151	2
Elavl2	1.35231e-140	0.338238	0.785	0.517	4.38865e-136	2
Hdgfrp3	2.81812e-128	0.337448	0.648	0.371	9.14565e-124	2
Cdkn1c	9.70689e-149	0.337331	0.663	0.383	3.15018e-144	2
Hist3h2a	1.40028e-95	0.335037	0.64	0.444	4.54432e-91	2
St6galnac5	1.84173e-159	0.333464	0.342	0.125	5.97696e-155	2
Mapt	3.85997e-141	0.333094	0.987	0.816	1.25267e-136	2
Tmsb10	1.94103e-149	0.329253	1	0.988	6.29922e-145	2
Crip2	1.21055e-147	0.32803	0.951	0.739	3.9286e-143	2
Rprm	2.94973e-140	0.326159	0.739	0.46	9.57276e-136	2
Tonsl	6.6447e-123	0.324375	0.686	0.425	2.1564e-118	2
Ptma	8.81163e-135	0.323175	1	0.996	2.85964e-130	2
Cxx1a	6.60175e-98	0.32314	0.664	0.404	2.14246e-93	2
Pcbp4	2.52012e-138	0.321679	0.968	0.77	8.17853e-134	2
Cdo1	2.78506e-172	0.321374	0.679	0.374	9.03836e-168	2
Marcksl1	3.74907e-166	0.319983	0.998	0.958	1.21668e-161	2
Hdac2	9.40914e-140	0.319897	0.965	0.816	3.05355e-135	2
Ywhaq	6.8628e-181	0.319883	0.998	0.965	2.22719e-176	2
Nr2f2	5.11864e-108	0.319543	0.33	0.137	1.66115e-103	2
Ntm	3.93185e-73	0.317804	0.72	0.578	1.276e-68	2
Pfn2	1.23085e-127	0.317196	0.994	0.873	3.99448e-123	2
Ecel1	2.6096e-52	0.316703	0.375	0.24	8.46894e-48	2
Gnb2l1	2.6653e-76	0.316285	0.679	0.422	8.64969e-72	2
Cadm1	3.87142e-95	0.315938	0.893	0.668	1.25639e-90	2
Ngfrap1	1.53519e-71	0.315713	0.681	0.426	4.98216e-67	2
Rundc3a	5.45165e-163	0.313666	0.949	0.731	1.76923e-158	2
Mmd	8.7028e-143	0.312358	0.811	0.559	2.82432e-138	2
Uchl1	1.22892e-114	0.30967	0.994	0.902	3.98822e-110	2
Atp2b1	6.92124e-65	0.306215	0.882	0.768	2.24615e-60	2
Gm2694	6.03372e-56	0.305252	0.459	0.273	1.95812e-51	2
2700060E02Rik	5.82846e-91	0.304455	0.67	0.41	1.89151e-86	2
Actl6b	5.88964e-170	0.303502	0.923	0.648	1.91136e-165	2
Cox5a	1.74543e-146	0.303136	0.992	0.961	5.66444e-142	2
Homer2	5.58992e-137	0.302246	0.439	0.207	1.8141e-132	2
Pbx1	5.62133e-162	0.301875	0.958	0.762	1.82429e-157	2
Calb2	0.00026725	0.301269	0.447	0.472	1	2
Plppr3	1.07214e-153	0.300362	0.945	0.695	3.47943e-149	2
Rufy3	1.30831e-150	0.300109	0.988	0.809	4.24587e-146	2
Prmt1	1.55103e-116	0.298966	0.983	0.886	5.03356e-112	2
Dpysl4	1.24417e-134	0.298704	0.829	0.563	4.0377e-130	2
Stmn3	7.21341e-114	0.297447	0.998	0.891	2.34097e-109	2
Rnd3	2.37092e-155	0.296734	0.72	0.425	7.69435e-151	2
Wbp1	3.0619e-129	0.295614	0.747	0.509	9.93678e-125	2
Ap3s1	1.06901e-132	0.295581	0.935	0.764	3.46926e-128	2
H2afy2	1.11545e-138	0.294997	0.967	0.744	3.61998e-134	2
2310036O22Rik	2.35285e-98	0.29447	0.665	0.401	7.6357e-94	2
Rpl13a	4.55629e-54	0.292907	0.946	0.801	1.47865e-49	2
Tceb1	1.00631e-99	0.292393	0.655	0.395	3.26577e-95	2
Carhsp1	4.23171e-119	0.292183	0.762	0.498	1.37332e-114	2
Vav3	7.94858e-240	0.291211	0.394	0.118	2.57955e-235	2
Tmem2	7.05457e-202	0.29112	0.488	0.194	2.28942e-197	2
Cplx2	2.59369e-79	0.289973	0.564	0.369	8.41731e-75	2
Gng3	2.16003e-106	0.287095	0.995	0.844	7.00996e-102	2
Chst8	1.08303e-156	0.285422	0.39	0.158	3.51476e-152	2
Gabbr1	3.79717e-58	0.28473	0.951	0.807	1.23229e-53	2
Cyth2	3.64949e-123	0.284521	0.926	0.76	1.18437e-118	2
Rnf165	8.2773e-128	0.283734	0.77	0.51	2.68623e-123	2
Parp6	1.36027e-144	0.28283	0.907	0.646	4.4145e-140	2
Traf4	1.33221e-130	0.282272	0.747	0.471	4.32341e-126	2
Ptms	5.38605e-168	0.28014	1	0.982	1.74794e-163	2
H3f3a	1.39432e-146	0.277148	1	0.995	4.525e-142	2
Btf3l4	4.83584e-103	0.276998	0.832	0.622	1.56937e-98	2
Apba2	4.05179e-120	0.276888	0.805	0.557	1.31493e-115	2
Sox4	1.04393e-97	0.275296	0.968	0.855	3.38785e-93	2
Erh	3.84737e-107	0.274835	0.995	0.908	1.24859e-102	2
Rbfox2	1.88318e-137	0.273763	0.969	0.752	6.1115e-133	2
Cmas	2.74269e-130	0.272536	0.939	0.752	8.90086e-126	2
Ilf2	5.09125e-112	0.272262	0.924	0.748	1.65226e-107	2
Hnrnpa1	7.04848e-121	0.270938	0.999	0.96	2.28744e-116	2
Lmo3	1.49216e-33	0.270604	0.466	0.357	4.8425e-29	2
Nnat	5.40316e-70	0.270559	1	0.95	1.75349e-65	2
Dynll1	3.86426e-136	0.270128	0.997	0.965	1.25407e-131	2
Evl	1.23958e-144	0.269248	0.991	0.922	4.02282e-140	2
Syt13	1.82554e-90	0.269034	0.636	0.417	5.92442e-86	2
Ap2m1	1.13725e-134	0.267995	0.994	0.947	3.69073e-130	2
Acot7	7.9721e-100	0.267434	0.933	0.731	2.58718e-95	2
Rnf187	1.15028e-165	0.267034	0.995	0.953	3.733e-161	2
Hsp90aa1	4.96094e-138	0.265847	0.995	0.976	1.60997e-133	2
Fdps	1.03803e-79	0.264898	0.903	0.742	3.36871e-75	2
Srp54b	9.80653e-122	0.264472	0.573	0.304	3.18251e-117	2
Ebf3	7.02879e-218	0.264038	0.325	0.083	2.28105e-213	2
Klf7	4.02878e-102	0.263281	0.932	0.788	1.30746e-97	2
1110001J03Rik	7.48915e-120	0.262809	0.591	0.316	2.43045e-115	2
Nrsn1	3.26897e-58	0.262387	0.681	0.516	1.06088e-53	2
Cox6a1	1.50837e-116	0.262366	0.994	0.926	4.8951e-112	2
Cotl1	3.66279e-78	0.26209	0.947	0.846	1.18869e-73	2
Rtn3	2.14137e-125	0.261416	0.99	0.949	6.9494e-121	2
Zfp811	1.39873e-170	0.26104	0.552	0.266	4.5393e-166	2
Smarce1	2.11311e-105	0.260241	0.926	0.747	6.85767e-101	2
Mrpl34	2.47915e-141	0.259393	0.969	0.818	8.04559e-137	2
Hbb-bs	6.04314e-17	0.258254	0.192	0.122	1.96118e-12	2
2700094K13Rik	5.46521e-100	0.25818	0.631	0.371	1.77363e-95	2
Fscn1	2.92777e-88	0.255951	0.979	0.903	9.5015e-84	2
Praf2	1.29078e-125	0.255627	0.737	0.471	4.18896e-121	2
Parvb	4.16668e-80	0.255613	0.424	0.249	1.35221e-75	2
Kif5c	1.24909e-106	0.255166	0.98	0.758	4.05367e-102	2
Hnrnpa2b1	1.35396e-91	0.254966	0.992	0.971	4.39401e-87	2
Ubald2	4.03381e-73	0.254191	0.867	0.731	1.30909e-68	2
Ciapin1	6.46663e-103	0.253727	0.859	0.662	2.09862e-98	2
Gdpd1	5.1621e-133	0.252875	0.864	0.606	1.67526e-128	2
Cxx1b	1.87712e-94	0.252862	0.629	0.369	6.09183e-90	2
Shox2	1.86518e-230	0.252218	0.193	0.026	6.05308e-226	2
Irx5	1.86837e-218	0.25133	0.27	0.057	6.06342e-214	2
Samd10	2.40022e-130	0.251088	0.867	0.582	7.78945e-126	2

## Sheet: Cluster 3
Figure 1-source data 2. Feature genes that define each of the 11 Pomc clusters
integrated across all six developmental stages.
The data are sorted from highest to lowest for each integrated custer by average log fold-change > 0.25
(avg_logFC) of gene expression in the featured cluster relative to all other clusters
pct.1, Percentage of cells in the indicated cluster with significant differential gene expression
pct.2, Percentage of cells in all other clusters with significant differential gene expression
p-val, p-value
p_val_adj, adjusted p-value for multiple comparisons
The Wilcoxon test was performed to identify the differentially expressed genes in each cluster
Gene	p_val	avg_logFC	pct.1	pct.2	p_val_adj	cluster
Snca	6.87629e-139	1.53062	0.789	0.476	2.23156e-134	3
C1ql1	1.23575e-120	1.45928	0.366	0.077	4.01037e-116	3
Nr4a2	8.05807e-292	1.40793	0.796	0.203	2.61508e-287	3
Meg3	4.07389e-131	1.1173	0.994	0.964	1.3221e-126	3
Snhg11	1.31059e-48	1.10927	0.96	0.812	4.25325e-44	3
Lmo4	2.74715e-75	1.04638	0.636	0.341	8.91532e-71	3
Epha5	1.18174e-123	1.0129	0.755	0.387	3.83511e-119	3
Dmrta2	0	0.969129	0.67	0.061	0	3
Gm47283	1.34699e-25	0.948679	0.587	0.418	4.3714e-21	3
Rmst	8.18866e-153	0.946998	0.874	0.464	2.65747e-148	3
Sncb	3.98564e-54	0.939428	0.706	0.505	1.29346e-49	3
Slc17a6	3.12204e-132	0.92654	0.743	0.39	1.0132e-127	3
Selenom	4.17597e-41	0.920268	0.524	0.377	1.35523e-36	3
Fxyd7	5.38479e-71	0.895679	0.767	0.556	1.74753e-66	3
Ebf3	2.35333e-286	0.874157	0.603	0.102	7.63727e-282	3
Elavl2	2.76777e-146	0.873121	0.848	0.547	8.98225e-142	3
Cadm1	3.68322e-114	0.852131	0.931	0.693	1.19532e-109	3
Ebf2	0	0.834599	0.599	0.066	0	3
Chl1	2.79638e-136	0.830656	0.844	0.465	9.07509e-132	3
Cntn1	9.40297e-85	0.8267	0.721	0.45	3.05155e-80	3
Pbx3	1.19726e-192	0.803349	0.698	0.208	3.88547e-188	3
Kcnq1ot1	6.53165e-12	0.800471	0.824	0.71	2.11972e-07	3
Gria2	5.86721e-55	0.795695	0.957	0.725	1.90409e-50	3
Opcml	4.10208e-91	0.786891	0.692	0.361	1.33125e-86	3
Vsnl1	6.02813e-83	0.770578	0.694	0.376	1.95631e-78	3
Chst2	2.53059e-71	0.756476	0.625	0.331	8.21253e-67	3
Ntng1	9.65999e-101	0.751964	0.735	0.4	3.13496e-96	3
Lmx1a	0	0.746419	0.698	0.048	0	3
Mirg	9.1174e-37	0.746355	0.581	0.332	2.95887e-32	3
Mt3	4.50112e-43	0.739614	0.727	0.579	1.46075e-38	3
Myt1l	8.25462e-126	0.739332	0.881	0.554	2.67887e-121	3
Pbx1	1.27321e-44	0.729482	0.879	0.789	4.13194e-40	3
Camk2n1	9.47017e-84	0.726197	0.832	0.729	3.07335e-79	3
Dner	1.13491e-114	0.723326	0.887	0.705	3.68313e-110	3
AC149090.1	1.88463e-32	0.707714	0.577	0.393	6.11618e-28	3
Pcdh17	1.42027e-58	0.706281	0.755	0.526	4.6092e-54	3
Cdk14	9.08361e-131	0.700278	0.763	0.378	2.9479e-126	3
Cbln2	2.36029e-67	0.686906	0.496	0.204	7.65984e-63	3
Pitx2	2.99287e-152	0.686493	0.391	0.07	9.71275e-148	3
Alcam	1.39095e-66	0.682362	0.739	0.442	4.51406e-62	3
Prkcb	8.63241e-84	0.681565	0.688	0.42	2.80148e-79	3
Tcf4	2.2477e-55	0.675224	0.753	0.587	7.29447e-51	3
Cadm2	1.08193e-90	0.667537	0.678	0.346	3.5112e-86	3
Atp1a3	1.45852e-88	0.666357	0.905	0.694	4.73332e-84	3
Camk2n2	5.83142e-48	0.661286	0.777	0.578	1.89247e-43	3
Inpp5f	1.86638e-74	0.649777	0.86	0.695	6.05695e-70	3
Cbln1	6.0787e-108	0.64656	0.587	0.211	1.97272e-103	3
Pgm2l1	1.84304e-86	0.645612	0.783	0.521	5.98123e-82	3
Bcl11a	9.13999e-62	0.642241	0.674	0.379	2.9662e-57	3
Pdzrn4	7.56916e-264	0.641555	0.638	0.122	2.45642e-259	3
Auts2	1.10375e-95	0.638631	0.838	0.585	3.58199e-91	3
Scn2a	8.19496e-51	0.634828	0.577	0.335	2.65951e-46	3
Atp1b1	5.67322e-56	0.633019	0.923	0.772	1.84113e-51	3
Plppr4	1.14856e-70	0.630824	0.709	0.415	3.72741e-66	3
Cdh13	1.58238e-108	0.629072	0.692	0.309	5.1353e-104	3
Fgf13	7.99004e-51	0.625167	0.708	0.509	2.59301e-46	3
Nrn1	3.62516e-144	0.618896	0.563	0.143	1.17647e-139	3
Cacna2d1	4.01971e-58	0.615267	0.769	0.573	1.30452e-53	3
Slc12a5	1.49586e-55	0.611475	0.7	0.462	4.8545e-51	3
Cxadr	2.46022e-85	0.60943	0.818	0.608	7.98414e-81	3
Klhl1	2.2799e-275	0.607858	0.617	0.11	7.39895e-271	3
Enc1	5.76992e-64	0.6067	0.694	0.466	1.87251e-59	3
Syt4	3.16398e-60	0.603521	0.953	0.696	1.02681e-55	3
Nxph4	0	0.602216	0.53	0.035	0	3
Olfm1	8.33438e-43	0.602169	0.771	0.633	2.70476e-38	3
Sybu	1.5656e-80	0.598421	0.729	0.464	5.08085e-76	3
Ndrg4	1.20702e-60	0.598273	0.856	0.674	3.91714e-56	3
Ank2	7.65244e-60	0.596985	0.943	0.774	2.48345e-55	3
Matk	2.99305e-48	0.596431	0.625	0.379	9.71334e-44	3
Lingo1	8.33854e-109	0.595704	0.787	0.468	2.70611e-104	3
App	1.76018e-77	0.59488	0.968	0.862	5.71231e-73	3
Foxa1	0	0.594288	0.53	0.057	0	3
Lingo2	4.30259e-142	0.592456	0.678	0.235	1.39632e-137	3
Ntm	9.13224e-45	0.588118	0.763	0.593	2.96369e-40	3
Nsg2	1.11362e-100	0.585486	0.945	0.815	3.61404e-96	3
Vgf	7.99003e-30	0.581988	0.623	0.383	2.593e-25	3
Ptprd	4.60041e-30	0.580853	0.717	0.518	1.49297e-25	3
Magi1	3.522e-74	0.579009	0.824	0.525	1.14299e-69	3
Gpm6a	6.96171e-83	0.575553	0.951	0.798	2.25928e-78	3
Syp	1.46994e-50	0.575095	0.885	0.691	4.77038e-46	3
Cspg5	7.43529e-63	0.573097	0.84	0.647	2.41297e-58	3
Uncx	0	0.57174	0.638	0.06	0	3
C130021I20Rik	0	0.569733	0.613	0.05	0	3
Nova1	3.96767e-100	0.569358	0.737	0.401	1.28763e-95	3
Pfkp	3.36796e-38	0.56782	0.666	0.487	1.093e-33	3
Rab3c	8.01009e-78	0.566486	0.816	0.555	2.59951e-73	3
Calb2	2.1063e-17	0.560972	0.587	0.463	6.83558e-13	3
Gabrb1	7.52355e-59	0.558187	0.625	0.35	2.44162e-54	3
Tmem191c	1.29155e-67	0.558091	0.674	0.393	4.19146e-63	3
Carmil3	1.94303e-46	0.551237	0.573	0.312	6.30572e-42	3
Grin2b	5.63533e-69	0.545131	0.761	0.437	1.82883e-64	3
Clstn3	1.7301e-43	0.544233	0.755	0.5	5.6147e-39	3
Celf4	2.26883e-85	0.543061	0.988	0.829	7.36302e-81	3
Cadps	9.72607e-49	0.53931	0.735	0.533	3.1564e-44	3
Gria3	3.9257e-116	0.538633	0.577	0.198	1.27401e-111	3
Nbea	6.5025e-52	0.538593	0.822	0.606	2.11026e-47	3
Fut9	4.99353e-66	0.538374	0.577	0.294	1.62055e-61	3
Cbln4	7.30923e-69	0.538231	0.348	0.108	2.37206e-64	3
Nav1	4.11255e-71	0.534687	0.921	0.741	1.33465e-66	3
Gpr162	4.5482e-95	0.532974	0.81	0.507	1.47603e-90	3
Tenm1	4.63181e-62	0.527807	0.646	0.334	1.50316e-57	3
Pclo	1.14433e-50	0.527765	0.737	0.502	3.71369e-46	3
Thy1	1.06284e-72	0.526391	0.435	0.155	3.44923e-68	3
Cend1	1.78614e-39	0.526111	0.717	0.589	5.79655e-35	3
Rasgrp2	1.47365e-56	0.525969	0.543	0.316	4.78245e-52	3
A2ml1	2.1268e-71	0.525573	0.372	0.122	6.90209e-67	3
C230004F18Rik	1.2462e-53	0.525306	0.54	0.268	4.04429e-49	3
Slc22a17	2.6886e-40	0.515229	0.937	0.807	8.72531e-36	3
Hpcal1	8.61664e-43	0.513453	0.711	0.555	2.79636e-38	3
Lypd1	4.09259e-66	0.511865	0.389	0.139	1.32817e-61	3
Mir124-2hg	4.68281e-200	0.507112	0.686	0.153	1.51971e-195	3
Tmem163	3.65961e-77	0.504018	0.715	0.358	1.18765e-72	3
Atp9a	2.24674e-66	0.503141	0.84	0.627	7.29134e-62	3
Grin1	1.36337e-66	0.49956	0.626	0.319	4.42454e-62	3
Rell2	1.73158e-81	0.499011	0.672	0.38	5.61951e-77	3
Napb	7.7325e-48	0.497068	0.674	0.498	2.50943e-43	3
Igsf8	3.66901e-52	0.495482	0.644	0.392	1.1907e-47	3
Phlda1	1.84211e-56	0.495287	0.682	0.416	5.97821e-52	3
Lsamp	1.51053e-32	0.494902	0.824	0.647	4.90214e-28	3
Cd200	3.99657e-67	0.494549	0.921	0.743	1.29701e-62	3
Cd47	1.66912e-27	0.493273	0.796	0.726	5.4168e-23	3
Sv2a	8.01014e-60	0.492996	0.842	0.643	2.59953e-55	3
Gabra1	6.92941e-103	0.48661	0.516	0.171	2.2488e-98	3
Adcyap1	3.62839e-80	0.486482	0.352	0.098	1.17752e-75	3
Glra2	1.33324e-144	0.486372	0.565	0.156	4.32675e-140	3
Dst	5.70263e-35	0.485762	0.824	0.679	1.85068e-30	3
Gm44644	1.38966e-30	0.485624	0.506	0.276	4.50985e-26	3
B230209E15Rik	8.29663e-30	0.485232	0.557	0.339	2.69251e-25	3
Cisd1	4.30156e-71	0.484759	0.883	0.825	1.39598e-66	3
Nrxn2	5.54319e-65	0.484586	0.958	0.813	1.79893e-60	3
Cacna1a	2.10273e-39	0.484201	0.721	0.501	6.82398e-35	3
Fam19a5	5.18006e-45	0.484028	0.634	0.413	1.68108e-40	3
Chga	4.59993e-57	0.484017	0.779	0.534	1.49281e-52	3
Cit	5.79788e-50	0.483819	0.609	0.344	1.88158e-45	3
Atp2c1	1.85436e-42	0.482285	0.775	0.633	6.01796e-38	3
Dnm1	4.50394e-43	0.482063	0.747	0.575	1.46166e-38	3
Ube3a	2.92537e-54	0.480826	0.974	0.886	9.4937e-50	3
Pkia	2.64719e-63	0.480692	0.808	0.676	8.59093e-59	3
Ache	8.73163e-34	0.479006	0.567	0.34	2.83368e-29	3
Nsg1	2.02163e-88	0.478095	0.958	0.869	6.56081e-84	3
5330434G04Rik	1.5839e-17	0.478002	0.644	0.451	5.14022e-13	3
Atp2b2	3.24888e-52	0.476935	0.595	0.349	1.05436e-47	3
Ntn1	0	0.475049	0.455	0.033	0	3
Nrgn	5.50985e-15	0.474816	0.397	0.27	1.78811e-10	3
Tac1	5.58345e-39	0.474717	0.379	0.161	1.812e-34	3
Hpca	7.2046e-130	0.47424	0.49	0.138	2.33811e-125	3
Grik2	2.53831e-54	0.47383	0.504	0.243	8.23757e-50	3
Zcchc18	2.1356e-60	0.471803	0.955	0.753	6.93066e-56	3
Lrfn5	1.26113e-46	0.471512	0.656	0.389	4.09273e-42	3
Srcin1	3.62921e-43	0.469318	0.698	0.521	1.17779e-38	3
Kifc2	2.06884e-67	0.467273	0.603	0.312	6.714e-63	3
A230057D06Rik	1.49296e-33	0.466906	0.403	0.192	4.8451e-29	3
Scg2	6.51709e-27	0.466181	0.814	0.592	2.11499e-22	3
Ptprs	5.91849e-61	0.465136	0.927	0.804	1.92073e-56	3
Camk2d	7.46594e-30	0.464596	0.753	0.61	2.42292e-25	3
Bend6	6.21496e-63	0.4632	0.603	0.333	2.01694e-58	3
Syngr3	6.28331e-51	0.462572	0.783	0.576	2.03912e-46	3
Ryr2	2.43788e-36	0.462518	0.381	0.172	7.91166e-32	3
Atp13a2	4.62185e-51	0.461001	0.893	0.745	1.49993e-46	3
Tmem132a	5.04788e-56	0.459904	0.82	0.597	1.63819e-51	3
En1	3.3214e-110	0.458936	0.178	0.02	1.07789e-105	3
Chd3os	3.00698e-53	0.45876	0.826	0.714	9.75856e-49	3
Dpp6	2.21919e-45	0.458448	0.806	0.554	7.20195e-41	3
Rac3	7.01445e-57	0.454966	0.913	0.819	2.2764e-52	3
Arfgef3	3.01545e-33	0.454416	0.591	0.371	9.78604e-29	3
Disp2	1.08868e-42	0.452592	0.67	0.451	3.53311e-38	3
Tmem145	2.14167e-59	0.45146	0.723	0.435	6.95037e-55	3
Dclk1	4.89684e-67	0.451358	0.951	0.805	1.58917e-62	3
Zcchc12	2.89672e-39	0.447518	0.923	0.721	9.40073e-35	3
Fam171a2	2.04431e-64	0.447312	0.866	0.681	6.63439e-60	3
Sdc3	1.04091e-46	0.447099	0.791	0.66	3.37805e-42	3
Chgb	4.3195e-23	0.444966	0.848	0.671	1.40181e-18	3
Lrp1b	1.58014e-64	0.444952	0.603	0.268	5.12802e-60	3
Mycbp2	1.32799e-33	0.443948	0.899	0.822	4.30972e-29	3
Eno2	3.92073e-64	0.443788	0.607	0.301	1.27239e-59	3
Herc1	2.58998e-45	0.443661	0.806	0.636	8.40527e-41	3
Fnbp1l	1.56261e-72	0.443033	0.935	0.787	5.07115e-68	3
Slc4a3	1.09271e-47	0.442961	0.654	0.412	3.54618e-43	3
Nrxn3	2.9936e-34	0.442866	0.698	0.472	9.71513e-30	3
Grid2	2.09962e-40	0.441593	0.538	0.288	6.81388e-36	3
Wsb2	9.70196e-30	0.439401	0.737	0.698	3.14858e-25	3
Aplp2	3.57194e-49	0.439228	0.82	0.697	1.1592e-44	3
Synpr	2.04187e-19	0.43877	0.397	0.238	6.62648e-15	3
Scamp1	8.3391e-67	0.435642	0.852	0.669	2.70629e-62	3
Mapt	4.90788e-61	0.433666	0.943	0.838	1.59275e-56	3
Cdkn1a	3.59732e-62	0.433101	0.514	0.233	1.16744e-57	3
Stum	1.58598e-165	0.432354	0.393	0.071	5.14698e-161	3
Nrxn1	6.57109e-47	0.431845	0.907	0.743	2.13252e-42	3
Bdnf	1.46178e-127	0.431288	0.472	0.117	4.7439e-123	3
Gabrg2	2.18257e-68	0.430337	0.755	0.46	7.08311e-64	3
Podxl2	3.35462e-67	0.430058	0.962	0.845	1.08867e-62	3
Spock2	1.2203e-44	0.42914	0.745	0.53	3.96026e-40	3
Pde3a	3.58842e-250	0.429059	0.397	0.046	1.16455e-245	3
Necab2	3.60355e-45	0.428643	0.662	0.474	1.16946e-40	3
Ank3	4.96179e-32	0.428129	0.945	0.758	1.61025e-27	3
Cacna1b	3.78495e-31	0.427611	0.715	0.494	1.22833e-26	3
Trim2	3.28549e-70	0.427608	0.903	0.712	1.06624e-65	3
Caly	7.05035e-34	0.427378	0.925	0.706	2.28805e-29	3
Raph1	5.9176e-52	0.427092	0.767	0.579	1.92044e-47	3
Mdga2	6.17374e-19	0.426216	0.597	0.42	2.00356e-14	3
Anks1b	6.49558e-61	0.4252	0.662	0.384	2.10801e-56	3
Gabra2	2.25005e-43	0.424553	0.555	0.292	7.30208e-39	3
Sorbs2	2.78509e-43	0.424021	0.646	0.383	9.03846e-39	3
Gabbr2	7.00576e-54	0.423808	0.553	0.307	2.27358e-49	3
Scn3b	3.57967e-67	0.423749	0.806	0.533	1.16171e-62	3
Nxph1	2.51005e-83	0.422771	0.532	0.199	8.14587e-79	3
Tspoap1	2.58396e-27	0.422467	0.486	0.27	8.38572e-23	3
Amn	2.26908e-185	0.421732	0.391	0.062	7.36383e-181	3
Gls	3.09092e-26	0.420344	0.763	0.604	1.0031e-21	3
B230334C09Rik	9.01545e-65	0.41876	0.605	0.294	2.92578e-60	3
Slc6a17	8.77394e-20	0.418704	0.585	0.383	2.84741e-15	3
Cadm3	1.065e-52	0.418641	0.8	0.549	3.45625e-48	3
Tmem91	2.64964e-55	0.418459	0.567	0.301	8.59889e-51	3
Nell1	3.66406e-40	0.417476	0.516	0.284	1.1891e-35	3
Lmtk3	5.79054e-39	0.41708	0.729	0.489	1.87921e-34	3
Fam131c	1.787e-52	0.416814	0.543	0.295	5.79935e-48	3
Unc80	3.74747e-22	0.416643	0.571	0.372	1.21617e-17	3
Syt13	1.11285e-54	0.414442	0.69	0.441	3.61153e-50	3
Slc24a3	4.01667e-52	0.41404	0.577	0.304	1.30353e-47	3
Ttc19	8.53291e-30	0.413825	0.694	0.512	2.76918e-25	3
Kif1a	1.05347e-41	0.413306	0.838	0.687	3.41882e-37	3
Atp2a2	2.52536e-27	0.412951	0.806	0.736	8.19554e-23	3
Grin3a	4.3229e-38	0.412032	0.478	0.265	1.40291e-33	3
March1	6.58087e-35	0.411079	0.632	0.423	2.13569e-30	3
Kcnma1	4.7277e-40	0.410459	0.577	0.356	1.53428e-35	3
Gm2694	9.14256e-35	0.410382	0.536	0.293	2.96703e-30	3
Nsf	3.42143e-37	0.409429	0.702	0.54	1.11036e-32	3
Zfp536	6.79787e-173	0.408958	0.542	0.12	2.20611e-168	3
B830012L14Rik	5.77898e-31	0.4088	0.37	0.176	1.87545e-26	3
Atp6v0e2	1.07219e-49	0.408372	0.858	0.731	3.47958e-45	3
Sgip1	4.3109e-47	0.40797	0.783	0.532	1.39902e-42	3
Map2	3.50078e-51	0.407635	0.951	0.805	1.13611e-46	3
2900097C17Rik	8.86506e-24	0.407262	0.514	0.404	2.87698e-19	3
Elmod1	6.21296e-57	0.407141	0.587	0.324	2.01629e-52	3
C1qtnf4	4.9732e-41	0.406965	0.858	0.688	1.61395e-36	3
Gap43	9.23716e-49	0.405968	0.966	0.914	2.99774e-44	3
Slc6a7	3.44529e-102	0.405083	0.528	0.177	1.1181e-97	3
Ptpn5	1.8314e-56	0.403035	0.796	0.542	5.94344e-52	3
Igsf9b	2.31939e-60	0.402266	0.494	0.21	7.52711e-56	3
Cers4	2.10234e-27	0.401987	0.777	0.555	6.82273e-23	3
Ube2ql1	1.91421e-54	0.401231	0.593	0.332	6.21219e-50	3
Snap91	3.84183e-52	0.400931	0.753	0.573	1.24679e-47	3
Tmem35a	1.34968e-63	0.400189	0.472	0.185	4.3801e-59	3
Shank1	5.34535e-44	0.399753	0.826	0.59	1.73473e-39	3
Nptn	7.18306e-39	0.39955	0.901	0.815	2.33112e-34	3
Nrbp2	7.62205e-53	0.398861	0.555	0.271	2.47358e-48	3
Serpini1	6.11979e-67	0.398773	0.662	0.332	1.98605e-62	3
Scn3a	6.22569e-54	0.397387	0.816	0.587	2.02042e-49	3
Aplp1	2.11362e-54	0.39681	0.968	0.837	6.85934e-50	3
Pcdh8	7.05977e-56	0.396667	0.528	0.246	2.29111e-51	3
Ralyl	1.68539e-49	0.396379	0.757	0.526	5.4696e-45	3
Ankrd12	6.09463e-61	0.396008	0.83	0.689	1.97789e-56	3
Pde10a	4.16084e-11	0.395803	0.603	0.426	1.35032e-06	3
Fry	6.59926e-39	0.395207	0.763	0.559	2.14166e-34	3
R3hdm1	2.44303e-24	0.39489	0.785	0.624	7.92836e-20	3
Arhgdig	7.26393e-25	0.394576	0.729	0.605	2.35736e-20	3
Plppr1	4.08503e-95	0.393645	0.686	0.292	1.32572e-90	3
Brinp3	4.14396e-35	0.392494	0.482	0.268	1.34484e-30	3
Atl1	4.22665e-41	0.392189	0.743	0.538	1.37168e-36	3
Pdzrn3	9.37438e-276	0.391934	0.451	0.053	3.04227e-271	3
Pgap1	9.24165e-42	0.391796	0.678	0.458	2.99919e-37	3
Foxa2	0	0.391789	0.34	0.005	0	3
Shroom2	9.29048e-107	0.391765	0.623	0.245	3.01504e-102	3
Stxbp1	1.07498e-36	0.391417	0.862	0.753	3.48863e-32	3
Vwa5b2	3.35112e-55	0.391031	0.482	0.209	1.08754e-50	3
Cacna1e	1.15241e-23	0.390798	0.617	0.4	3.73992e-19	3
St8sia2	2.6507e-42	0.390606	0.692	0.465	8.60233e-38	3
Cacna2d2	2.61191e-38	0.389797	0.65	0.44	8.47643e-34	3
Tmem178b	5.20312e-45	0.389284	0.678	0.44	1.68857e-40	3
Erbb4	5.91771e-142	0.388937	0.538	0.141	1.92048e-137	3
Ddc	4.65499e-07	0.388427	0.2	0.132	0.0151068	3
Th	1.06328e-57	0.387926	0.18	0.037	3.45067e-53	3
Nktr	1.60694e-12	0.387576	0.86	0.75	5.21502e-08	3
Nrp2	5.93857e-40	0.387135	0.676	0.448	1.92725e-35	3
Rfng	3.57311e-60	0.387131	0.725	0.413	1.15958e-55	3
Grm5	5.9358e-31	0.386913	0.573	0.362	1.92634e-26	3
Pitx3	0	0.385103	0.154	0.002	0	3
Tnks	1.98244e-35	0.385082	0.508	0.311	6.4336e-31	3
Eml5	2.71268e-17	0.384034	0.555	0.379	8.80345e-13	3
Rgma	2.73987e-98	0.38374	0.54	0.174	8.89169e-94	3
Adgrl1	1.68883e-51	0.383667	0.854	0.693	5.48076e-47	3
Selenow	3.41506e-09	0.383451	0.553	0.51	0.000110829	3
Serinc1	5.50611e-31	0.383207	0.935	0.9	1.7869e-26	3
Cdc42bpa	3.4026e-31	0.382712	0.646	0.455	1.10425e-26	3
Adgrb2	2.79453e-56	0.382606	0.615	0.333	9.06908e-52	3
Sez6	2.59818e-69	0.382057	0.625	0.304	8.43189e-65	3
Iglon5	2.39263e-99	0.38198	0.625	0.25	7.76479e-95	3
Magee1	8.07485e-41	0.381805	0.8	0.595	2.62053e-36	3
Pcdh15	1.45063e-70	0.381611	0.451	0.153	4.70772e-66	3
Ncald	2.33623e-29	0.379264	0.749	0.579	7.58177e-25	3
Jph4	3.43269e-49	0.379257	0.824	0.587	1.11401e-44	3
Tubb2a	6.21884e-37	0.378871	0.994	0.972	2.0182e-32	3
Gaa	6.00015e-10	0.378282	0.741	0.594	1.94723e-05	3
Reep1	1.81533e-58	0.378136	0.883	0.715	5.89129e-54	3
Clstn1	4.45941e-45	0.377624	0.822	0.708	1.44721e-40	3
Kcnb2	5.38807e-56	0.377427	0.571	0.283	1.74859e-51	3
Tenm2	4.7377e-30	0.376469	0.613	0.445	1.53752e-25	3
Miat	3.44713e-14	0.376035	0.686	0.525	1.1187e-09	3
Mgst3	1.00812e-33	0.374266	0.783	0.718	3.27166e-29	3
Kalrn	1.16254e-27	0.374054	0.609	0.411	3.77279e-23	3
Adra1b	1.09831e-65	0.373473	0.364	0.118	3.56433e-61	3
Neurod2	0	0.373073	0.346	0.003	0	3
Tanc2	1.22273e-23	0.372441	0.792	0.633	3.96813e-19	3
Ctnnd2	2.81353e-33	0.372346	0.723	0.569	9.13075e-29	3
Ntrk2	2.76508e-35	0.372229	0.727	0.493	8.97351e-31	3
Psd	2.66678e-46	0.370438	0.858	0.636	8.6545e-42	3
Pak3	3.08196e-51	0.369228	0.885	0.734	1.00019e-46	3
Car11	4.72384e-61	0.369013	0.579	0.299	1.53303e-56	3
Epha10	7.66385e-132	0.368811	0.464	0.113	2.48715e-127	3
Pabpn1	1.07087e-10	0.368276	0.82	0.685	3.47531e-06	3
Bhlhe22	0	0.367894	0.354	0.025	0	3
Gabbr1	6.25154e-45	0.367487	0.955	0.824	2.02881e-40	3
Adgrb3	5.97685e-25	0.367388	0.704	0.489	1.93967e-20	3
Ablim3	4.16966e-59	0.367319	0.67	0.386	1.35318e-54	3
Homer2	4.5032e-63	0.366956	0.526	0.232	1.46142e-58	3
Igfbp5	6.40305e-23	0.365312	0.591	0.422	2.07798e-18	3
Adam23	1.11037e-29	0.365008	0.642	0.405	3.60348e-25	3
Rnf152	1.20354e-52	0.364685	0.502	0.245	3.90585e-48	3
Dnm3	1.61551e-38	0.364182	0.66	0.424	5.24282e-34	3
Neurod1	1.25287e-116	0.364028	0.377	0.079	4.06593e-112	3
Csrp2	4.77619e-38	0.363871	0.725	0.537	1.55002e-33	3
Adcy1	1.88822e-71	0.363715	0.512	0.202	6.12784e-67	3
Scn8a	7.31585e-44	0.362849	0.536	0.282	2.37421e-39	3
Ret	1.87913e-146	0.362163	0.488	0.112	6.09833e-142	3
Tenm4	1.09178e-54	0.361567	0.543	0.258	3.54316e-50	3
Atp6v1a	2.80486e-38	0.361414	0.789	0.686	9.1026e-34	3
Tmem151a	1.57706e-37	0.360645	0.547	0.336	5.11804e-33	3
Pdgfa	4.86048e-36	0.360427	0.589	0.376	1.57737e-31	3
Ttc9b	1.95554e-23	0.360377	0.794	0.736	6.3463e-19	3
Basp1	7.77138e-32	0.359571	0.984	0.991	2.52205e-27	3
Plcb1	1.52857e-76	0.358789	0.528	0.215	4.96066e-72	3
Tubb2b	7.39925e-24	0.357865	0.957	0.967	2.40128e-19	3
Fndc4	1.17571e-65	0.356787	0.719	0.411	3.81554e-61	3
Stmn3	1.23881e-38	0.356691	0.974	0.905	4.0203e-34	3
Rab3a	9.05235e-41	0.356421	0.947	0.843	2.93776e-36	3
Abr	1.69091e-41	0.356342	0.81	0.639	5.48751e-37	3
Sptbn1	1.0917e-38	0.355854	0.909	0.773	3.5429e-34	3
Rbm5	2.20974e-13	0.355229	0.883	0.77	7.17128e-09	3
Pam	2.94226e-23	0.354633	0.632	0.466	9.54853e-19	3
Flrt3	1.58573e-98	0.353532	0.506	0.16	5.14618e-94	3
Clec2l	2.49635e-23	0.353423	0.553	0.434	8.10139e-19	3
Unc13a	1.75228e-22	0.353335	0.522	0.331	5.68667e-18	3
Ncam2	2.3732e-41	0.352217	0.504	0.258	7.70174e-37	3
Wdr47	3.38723e-65	0.352072	0.723	0.42	1.09926e-60	3
Hecw1	6.60325e-36	0.352038	0.698	0.474	2.14295e-31	3
Iqsec3	8.73305e-66	0.351662	0.583	0.275	2.83414e-61	3
Tuba4a	6.31373e-39	0.350565	0.474	0.262	2.049e-34	3
Thra	1.45616e-46	0.350514	0.927	0.867	4.72568e-42	3
Tnik	3.01906e-23	0.350219	0.761	0.61	9.79774e-19	3
Nexmif	7.08935e-32	0.350146	0.5	0.296	2.30071e-27	3
Enpp5	7.62433e-49	0.350083	0.696	0.421	2.47433e-44	3
Adgrb1	3.08476e-33	0.349904	0.65	0.442	1.0011e-28	3
Csmd3	2.1648e-36	0.349065	0.545	0.288	7.02543e-32	3
Slc6a1	1.24494e-35	0.347604	0.652	0.48	4.04022e-31	3
Wnt5a	6.34355e-60	0.34747	0.358	0.123	2.05867e-55	3
Tmod2	9.7389e-42	0.346477	0.877	0.765	3.16057e-37	3
Nlgn1	5.13308e-45	0.346064	0.599	0.345	1.66584e-40	3
Dpp10	1.88477e-78	0.346025	0.534	0.209	6.11664e-74	3
Ckmt1	4.45725e-39	0.345823	0.573	0.36	1.44651e-34	3
Baiap3	3.11006e-07	0.345282	0.538	0.409	0.0100931	3
Sptan1	5.96216e-31	0.34498	0.824	0.696	1.9349e-26	3
Gpc6	1.04723e-12	0.344945	0.403	0.296	3.39858e-08	3
Dock3	3.09968e-40	0.343613	0.551	0.293	1.00594e-35	3
Pde1a	1.58701e-91	0.343579	0.439	0.136	5.15033e-87	3
Ppargc1a	2.42576e-110	0.343179	0.395	0.094	7.87233e-106	3
Slc38a1	6.33381e-22	0.34305	0.86	0.736	2.05551e-17	3
Rtn1	5.40244e-48	0.343015	0.998	0.947	1.75325e-43	3
Slc4a10	1.52915e-64	0.342767	0.492	0.203	4.96257e-60	3
Atp2b1	6.69299e-17	0.342588	0.852	0.783	2.17208e-12	3
Necab1	5.52557e-159	0.341115	0.368	0.061	1.79321e-154	3
Rev3l	1.86807e-38	0.339552	0.698	0.477	6.06245e-34	3
Itfg1	1.19926e-37	0.339236	0.826	0.708	3.89197e-33	3
Sez6l2	3.05513e-26	0.338262	0.757	0.576	9.91481e-22	3
Grina	1.94411e-34	0.338165	0.899	0.843	6.30921e-30	3
Fam19a2	9.51953e-50	0.338137	0.457	0.204	3.08937e-45	3
Syndig1l	2.43506e-157	0.337758	0.458	0.096	7.90251e-153	3
Camkv	5.34862e-33	0.337619	0.569	0.369	1.73579e-28	3
Edil3	1.10927e-38	0.337543	0.664	0.382	3.59993e-34	3
Dmxl2	7.54242e-38	0.336537	0.632	0.406	2.44774e-33	3
Plxna2	7.92941e-55	0.336161	0.526	0.237	2.57333e-50	3
Arxes1	1.51645e-24	0.336151	0.832	0.699	4.92134e-20	3
Atp6v0a1	2.68175e-29	0.336083	0.785	0.651	8.70307e-25	3
Impact	1.71264e-19	0.335164	0.688	0.578	5.55803e-15	3
Stx1b	7.82279e-36	0.334643	0.654	0.464	2.53873e-31	3
Zcchc7	2.45821e-11	0.334336	0.551	0.407	7.97764e-07	3
Mapk10	3.92044e-35	0.33408	0.751	0.547	1.2723e-30	3
Atat1	1.86276e-32	0.333669	0.852	0.696	6.04523e-28	3
Pacsin1	1.02098e-34	0.333065	0.595	0.379	3.31337e-30	3
Sorcs3	5.39299e-48	0.332986	0.476	0.219	1.75019e-43	3
Scn9a	1.63518e-12	0.332256	0.666	0.51	5.30663e-08	3
Nrcam	1.13944e-26	0.331148	0.656	0.463	3.69783e-22	3
Etnk1	1.64889e-27	0.331134	0.781	0.647	5.35115e-23	3
Lmx1b	0	0.330875	0.486	0.032	0	3
Pcdh11x	3.24982e-16	0.330227	0.421	0.271	1.05466e-11	3
Chst1	1.25406e-34	0.330001	0.715	0.488	4.06979e-30	3
Hectd4	2.15797e-25	0.329467	0.494	0.321	7.00326e-21	3
Ccdc85a	8.43367e-53	0.329197	0.605	0.325	2.73698e-48	3
Ncdn	1.74854e-46	0.328681	0.66	0.408	5.67454e-42	3
Stmn4	6.53893e-27	0.328569	0.941	0.791	2.12208e-22	3
Chst8	9.07536e-96	0.3284	0.547	0.18	2.94523e-91	3
Fbxo9	3.10733e-36	0.328115	0.706	0.557	1.00842e-31	3
Ncam1	2.23619e-29	0.327843	0.996	0.875	7.2571e-25	3
Cpne7	2.94651e-40	0.327596	0.401	0.179	9.5623e-36	3
Lnpk	7.89729e-35	0.327373	0.47	0.248	2.56291e-30	3
Usp29	5.23336e-18	0.327332	0.808	0.645	1.69838e-13	3
Crhbp	5.55322e-154	0.327247	0.217	0.021	1.80219e-149	3
2900011O08Rik	4.13374e-38	0.327087	0.794	0.65	1.34152e-33	3
Birc6	1.60136e-12	0.326728	0.702	0.606	5.19688e-08	3
Fam3c	8.90243e-40	0.326704	0.644	0.444	2.88911e-35	3
4932438A13Rik	4.22009e-28	0.326327	0.591	0.395	1.36954e-23	3
Hdgfl3	1.05851e-23	0.324811	0.496	0.34	3.43518e-19	3
Zfp445	7.45173e-27	0.32481	0.508	0.296	2.41831e-22	3
Scai	1.1119e-38	0.324805	0.611	0.361	3.60845e-34	3
Grik5	3.03751e-28	0.324731	0.8	0.634	9.85762e-24	3
Scn1a	2.42675e-68	0.324024	0.415	0.139	7.87555e-64	3
Ly6h	2.40391e-31	0.323819	0.99	0.904	7.80142e-27	3
Adgrl3	1.39458e-15	0.323698	0.759	0.585	4.52583e-11	3
Slc7a14	1.43536e-43	0.323077	0.466	0.22	4.65819e-39	3
Klhdc8a	4.76984e-119	0.322512	0.508	0.148	1.54796e-114	3
Lrrc4b	1.33948e-29	0.322506	0.747	0.583	4.34702e-25	3
Bicd1	2.58485e-17	0.322486	0.664	0.486	8.38861e-13	3
Dpysl3	4.74774e-29	0.322325	0.86	0.796	1.54078e-24	3
Caskin1	9.044e-26	0.322313	0.569	0.377	2.93505e-21	3
Faim2	2.91174e-20	0.322306	0.575	0.372	9.44948e-16	3
Sema5a	4.11967e-17	0.321843	0.354	0.219	1.33696e-12	3
Ids	9.65099e-31	0.320556	0.678	0.529	3.13203e-26	3
Rab6b	9.52815e-28	0.320085	0.834	0.77	3.09217e-23	3
Cds2	4.21827e-25	0.319706	0.682	0.505	1.36896e-20	3
AC160336.1	5.31887e-14	0.319467	0.425	0.29	1.72613e-09	3
Sh3gl2	2.20276e-36	0.318657	0.621	0.402	7.14861e-32	3
Apba1	8.25807e-35	0.318614	0.569	0.374	2.67999e-30	3
St6galnac5	7.25775e-91	0.317669	0.472	0.146	2.35536e-86	3
Adap1	3.48241e-36	0.31749	0.607	0.395	1.13015e-31	3
Dnmt3a	2.18179e-23	0.317199	0.773	0.678	7.08057e-19	3
Arl6ip1	2.50414e-41	0.317099	0.927	0.933	8.1267e-37	3
B4gat1	9.96428e-20	0.315133	0.698	0.548	3.23371e-15	3
Plppr3	6.64789e-30	0.314689	0.905	0.727	2.15744e-25	3
Ntrk3	1.60921e-21	0.314389	0.595	0.402	5.22236e-17	3
Tmem59l	8.6974e-25	0.314041	0.713	0.495	2.82257e-20	3
Gm38393	2.95312e-29	0.313562	0.383	0.188	9.58376e-25	3
Tecr	1.65867e-28	0.313232	0.994	0.965	5.38287e-24	3
Tshz1	2.12807e-61	0.311726	0.433	0.166	6.90622e-57	3
Ddah1	9.46882e-32	0.311211	0.634	0.462	3.07292e-27	3
Leng8	9.80278e-05	0.310812	0.597	0.507	1	3
Lrrn3	7.75967e-25	0.310802	0.664	0.47	2.51825e-20	3
Olfm2	6.15071e-27	0.3106	0.573	0.388	1.99609e-22	3
Nsd3	4.07904e-12	0.310315	0.551	0.403	1.32377e-07	3
Dzank1	4.8961e-30	0.310271	0.52	0.324	1.58893e-25	3
Macrod2	1.0873e-42	0.310004	0.741	0.5	3.52863e-38	3
Sptbn4	1.81556e-52	0.30965	0.381	0.142	5.89203e-48	3
Gnao1	3.42942e-27	0.309207	0.905	0.758	1.11295e-22	3
Kifap3	2.85098e-38	0.308966	0.802	0.682	9.25228e-34	3
Nptxr	3.80612e-19	0.307824	0.682	0.594	1.2352e-14	3
Sulf1	6.88576e-82	0.307544	0.37	0.104	2.23464e-77	3
Nav2	1.304e-05	0.307382	0.638	0.543	0.423187	3
Tmx4	1.52365e-16	0.307351	0.864	0.731	4.9447e-12	3
Grin2d	3.44427e-59	0.307322	0.445	0.186	1.11777e-54	3
Trio	1.46813e-17	0.30732	0.702	0.579	4.76452e-13	3
Mpped2	1.71652e-20	0.306667	0.824	0.704	5.57063e-16	3
Dgkh	1.08338e-21	0.306546	0.356	0.191	3.51589e-17	3
Hmgcs1	1.30275e-32	0.306484	0.909	0.81	4.22783e-28	3
Ttc14	3.80221e-12	0.306477	0.759	0.613	1.23393e-07	3
Kctd8	2.42332e-26	0.305896	0.375	0.205	7.86442e-22	3
Pnck	1.0755e-28	0.30582	0.818	0.579	3.49032e-24	3
Rnf112	1.05605e-12	0.305723	0.532	0.366	3.42721e-08	3
Erc2	2.1956e-39	0.305524	0.64	0.391	7.12538e-35	3
Gigyf1	4.55987e-11	0.305447	0.561	0.416	1.47982e-06	3
Dtna	1.19167e-14	0.305116	0.575	0.399	3.86733e-10	3
Ppp3ca	1.29305e-24	0.304672	0.919	0.862	4.19633e-20	3
Scamp5	2.01364e-34	0.303886	0.654	0.452	6.53485e-30	3
Kif5a	6.91319e-28	0.302495	0.729	0.581	2.24354e-23	3
Phf24	6.20601e-59	0.302295	0.569	0.29	2.01404e-54	3
Syt16	2.82778e-39	0.30161	0.735	0.504	9.177e-35	3
Atrx	1.40616e-31	0.301609	0.897	0.832	4.5634e-27	3
Gpr85	5.60453e-39	0.301159	0.761	0.527	1.81884e-34	3
Atp11b	1.06905e-29	0.300659	0.54	0.319	3.46937e-25	3
Dnajc6	2.81801e-31	0.300246	0.619	0.426	9.1453e-27	3
Atp6ap2	2.37713e-22	0.299849	0.852	0.789	7.7145e-18	3
Rasgef1b	3.59038e-98	0.299454	0.474	0.139	1.16519e-93	3
Nfasc	1.71628e-21	0.299023	0.68	0.478	5.56983e-17	3
Scn1b	3.72152e-28	0.298669	0.47	0.276	1.20774e-23	3
Dpysl5	6.71419e-32	0.29855	0.781	0.643	2.17895e-27	3
Mast1	1.97552e-29	0.298221	0.611	0.405	6.41116e-25	3
Csdc2	4.12734e-41	0.298195	0.702	0.483	1.33945e-36	3
Ccdc88a	6.22596e-32	0.298108	0.889	0.784	2.02051e-27	3
Tspan13	2.95865e-39	0.298106	0.931	0.848	9.6017e-35	3
Stau2	9.29195e-37	0.29732	0.735	0.568	3.01552e-32	3
Kif3a	3.43756e-31	0.297044	0.796	0.684	1.11559e-26	3
Tnrc6b	4.53391e-13	0.296914	0.709	0.58	1.47139e-08	3
Syn2	8.11203e-27	0.296111	0.656	0.456	2.6326e-22	3
Guf1	1.68462e-18	0.296045	0.579	0.389	5.46711e-14	3
D430041D05Rik	4.04165e-39	0.29585	0.526	0.279	1.31164e-34	3
Atrn	2.46099e-31	0.295822	0.593	0.377	7.98666e-27	3
Gnal	3.5595e-50	0.295623	0.565	0.299	1.15516e-45	3
Pkp4	6.1615e-16	0.29541	0.553	0.42	1.99959e-11	3
Fam155a	2.08078e-27	0.295163	0.747	0.522	6.75275e-23	3
Stk39	5.00101e-37	0.295035	0.591	0.355	1.62298e-32	3
Rtn4	1.09676e-37	0.29469	0.943	0.948	3.55931e-33	3
Ppp1r14c	1.47593e-33	0.294675	0.555	0.351	4.78983e-29	3
Pole4	9.06959e-48	0.293803	0.664	0.408	2.94336e-43	3
Slc18a2	5.67031e-63	0.293657	0.391	0.129	1.84019e-58	3
Cacna1g	4.85493e-49	0.293453	0.453	0.193	1.57557e-44	3
Cx3cl1	1.75789e-36	0.293345	0.494	0.255	5.7049e-32	3
Mast4	4.91208e-34	0.2933	0.543	0.307	1.59412e-29	3
Tspan7	4.85801e-16	0.292967	0.82	0.724	1.57657e-11	3
Tnrc6a	3.69249e-09	0.292138	0.791	0.678	0.000119832	3
Spata7	2.29261e-15	0.292127	0.559	0.39	7.44021e-11	3
Dmtn	1.03386e-30	0.291899	0.694	0.452	3.35519e-26	3
Glrb	4.61366e-36	0.29166	0.488	0.265	1.49727e-31	3
2410089E03Rik	2.69041e-15	0.290886	0.587	0.416	8.73118e-11	3
Cdh8	3.37748e-54	0.290848	0.46	0.19	1.09609e-49	3
Dync1h1	3.00086e-22	0.290801	0.808	0.732	9.73869e-18	3
Ncoa7	6.89438e-26	0.290623	0.591	0.432	2.23743e-21	3
Nsd2	6.28847e-20	0.290313	0.508	0.353	2.0408e-15	3
Hook1	1.24657e-22	0.290079	0.587	0.389	4.04549e-18	3
Dock4	7.37424e-32	0.288991	0.464	0.244	2.39316e-27	3
Gm45768	9.62217e-215	0.288977	0.356	0.042	3.12268e-210	3
Srek1	1.487e-09	0.288877	0.692	0.569	4.82576e-05	3
Rgs17	2.31626e-24	0.288767	0.709	0.561	7.51697e-20	3
Pitpnm1	5.26518e-18	0.288611	0.579	0.401	1.70871e-13	3
Fam135b	2.39768e-11	0.288388	0.368	0.233	7.78118e-07	3
Tacr3	2.17242e-76	0.288334	0.251	0.053	7.05017e-72	3
Stx3	1.60197e-23	0.288294	0.48	0.276	5.19887e-19	3
Fus	4.46809e-09	0.287865	0.953	0.93	0.000145003	3
Pdxp	7.30239e-11	0.287838	0.48	0.39	2.36984e-06	3
Srrm3	1.05947e-26	0.287777	0.676	0.458	3.43829e-22	3
Adam22	6.27238e-24	0.287688	0.573	0.372	2.03557e-19	3
Asic2	6.55617e-31	0.287663	0.587	0.366	2.12767e-26	3
Dennd6b	4.03292e-24	0.287385	0.678	0.454	1.3088e-19	3
Ptprn	1.86984e-07	0.287211	0.666	0.544	0.00606818	3
Rtn3	4.57002e-42	0.285989	0.962	0.955	1.48311e-37	3
Elmo1	3.70665e-13	0.285953	0.603	0.49	1.20292e-08	3
Dscam	6.83259e-35	0.285909	0.613	0.373	2.21738e-30	3
Slc35f1	6.63868e-46	0.285457	0.555	0.284	2.15445e-41	3
Mien1	6.69977e-17	0.285252	0.783	0.821	2.17428e-12	3
Slc25a23	3.09991e-30	0.285235	0.662	0.438	1.00602e-25	3
Cnih2	4.39904e-29	0.28479	0.879	0.827	1.42762e-24	3
Chd5	3.62001e-28	0.284687	0.686	0.471	1.1748e-23	3
Cntnap5a	5.84435e-28	0.284545	0.514	0.312	1.89667e-23	3
Adam11	1.6115e-48	0.284516	0.508	0.229	5.2298e-44	3
Chd3	2.99629e-30	0.284478	0.816	0.656	9.72386e-26	3
Resp18	6.64913e-18	0.284196	0.919	0.744	2.15784e-13	3
Dus3l	2.58665e-20	0.283854	0.575	0.378	8.39445e-16	3
Ywhag	2.39721e-33	0.283646	0.917	0.913	7.77965e-29	3
Rabgap1l	2.72909e-31	0.283454	0.632	0.417	8.85673e-27	3
Hdac11	3.55542e-20	0.283141	0.668	0.54	1.15384e-15	3
Sec61a2	1.17485e-25	0.283026	0.713	0.49	3.81274e-21	3
Unc13c	1.034e-168	0.282909	0.296	0.037	3.35564e-164	3
Nalcn	1.13851e-25	0.282674	0.528	0.314	3.69481e-21	3
Gpc1	1.5292e-25	0.281997	0.528	0.306	4.9627e-21	3
Ankrd17	8.42513e-11	0.281903	0.775	0.676	2.73421e-06	3
Tusc3	5.57405e-25	0.281562	0.881	0.789	1.80895e-20	3
Prkca	4.66094e-31	0.281381	0.484	0.266	1.51261e-26	3
Sgsm2	1.58349e-11	0.281335	0.557	0.403	5.13891e-07	3
Kmt2a	1.0673e-14	0.281144	0.694	0.544	3.4637e-10	3
Astn1	5.30974e-21	0.281027	0.696	0.54	1.72317e-16	3
Pianp	4.33829e-30	0.280717	0.715	0.496	1.4079e-25	3
Erc1	4.16766e-34	0.28052	0.708	0.489	1.35253e-29	3
Rasgrp1	6.77408e-55	0.280517	0.3	0.095	2.19839e-50	3
Cntn5	3.00412e-41	0.280323	0.433	0.191	9.74926e-37	3
Rnf14	2.81329e-29	0.280209	0.796	0.775	9.12997e-25	3
Arglu1	3.37797e-07	0.280107	0.875	0.811	0.0109625	3
Syt7	3.65855e-44	0.27967	0.589	0.321	1.18731e-39	3
C130073E24Rik	2.38268e-32	0.279476	0.328	0.14	7.7325e-28	3
Agtpbp1	1.50035e-29	0.279009	0.646	0.436	4.86908e-25	3
Cbx6	2.85979e-22	0.278782	0.753	0.609	9.28088e-18	3
Rims1	1.78866e-27	0.278705	0.542	0.335	5.80475e-23	3
Bcl11b	7.4206e-69	0.278647	0.401	0.125	2.40821e-64	3
Kcnh7	2.02245e-48	0.278604	0.453	0.191	6.56344e-44	3
Zranb2	8.17155e-15	0.27841	0.84	0.722	2.65191e-10	3
Adamts2	0	0.277981	0.332	0.022	0	3
Trnp1	5.23633e-37	0.277933	0.453	0.24	1.69935e-32	3
Cacna2d3	4.92399e-37	0.277297	0.36	0.159	1.59798e-32	3
Apba2	6.77144e-32	0.277215	0.761	0.588	2.19754e-27	3
Snhg20	2.58086e-15	0.276781	0.569	0.39	8.37567e-11	3
Oprl1	3.12273e-15	0.276716	0.664	0.481	1.01342e-10	3
Snx16	1.45765e-32	0.276639	0.704	0.543	4.7305e-28	3
Prdm8	0	0.276634	0.243	0.011	0	3
Smg1	7.26056e-12	0.276006	0.555	0.402	2.35627e-07	3
Enah	6.77691e-16	0.275941	0.874	0.727	2.19931e-11	3
Mkln1	2.27088e-11	0.275916	0.743	0.601	7.36969e-07	3
Robo2	7.03798e-35	0.275781	0.599	0.345	2.28404e-30	3
Hs3st4	2.0099e-47	0.275708	0.395	0.159	6.52274e-43	3
Pcsk2	4.39714e-32	0.275392	0.615	0.344	1.427e-27	3
Madd	1.05643e-15	0.275284	0.634	0.463	3.42844e-11	3
Snrpn	1.70664e-23	0.275239	0.933	0.895	5.53856e-19	3
Rgs9	1.44224e-22	0.275238	0.453	0.262	4.68051e-18	3
Syn1	1.99258e-28	0.274489	0.747	0.595	6.46654e-24	3
Kif1b	1.2592e-17	0.273859	0.909	0.827	4.08649e-13	3
Fabp3	1.06386e-16	0.273497	0.725	0.644	3.45253e-12	3
Grik1	1.116e-38	0.271833	0.294	0.109	3.62174e-34	3
Endod1	2.33004e-36	0.271826	0.516	0.288	7.56167e-32	3
Slc6a6	2.54211e-13	0.271797	0.753	0.631	8.24992e-09	3
Slc2a3	2.01587e-31	0.271721	0.504	0.281	6.54209e-27	3
9530059O14Rik	1.60999e-37	0.271609	0.342	0.139	5.22489e-33	3
Dlg4	8.04244e-16	0.271223	0.771	0.649	2.61001e-11	3
Cask	1.06522e-26	0.271153	0.794	0.687	3.45696e-22	3
Abca3	1.84985e-19	0.271128	0.589	0.414	6.00332e-15	3
Clmp	2.64591e-35	0.270869	0.709	0.473	8.58676e-31	3
Hspa4l	1.03444e-19	0.270695	0.579	0.408	3.35705e-15	3
Pde4a	1.35553e-42	0.269988	0.49	0.238	4.39911e-38	3
AI314180	2.80031e-09	0.269832	0.543	0.423	9.08784e-05	3
Amer2	9.60246e-26	0.26983	0.648	0.44	3.11629e-21	3
Kcnc4	6.17596e-60	0.269761	0.419	0.157	2.00428e-55	3
Car10	6.26274e-18	0.269627	0.623	0.425	2.03245e-13	3
Slc10a4	1.65398e-16	0.26953	0.138	0.055	5.36766e-12	3
Fam168a	2.60943e-23	0.268838	0.692	0.531	8.46838e-19	3
Ggt7	5.17473e-23	0.268759	0.567	0.352	1.67935e-18	3
Pdlim7	1.01827e-27	0.268587	0.777	0.618	3.30458e-23	3
Wdr13	5.02621e-29	0.268517	0.66	0.457	1.63116e-24	3
Syt1	4.80724e-17	0.268433	0.739	0.563	1.56009e-12	3
Atp2b4	1.57222e-23	0.268423	0.457	0.272	5.10233e-19	3
Arhgap20	2.995e-32	0.268357	0.534	0.303	9.71968e-28	3
Cdk5r2	4.70562e-29	0.26835	0.587	0.404	1.52711e-24	3
Kcna6	2.12895e-28	0.267978	0.466	0.256	6.90909e-24	3
Reep2	1.25303e-20	0.267853	0.719	0.536	4.06647e-16	3
Nav3	1.48003e-20	0.267831	0.626	0.467	4.80315e-16	3
Ablim1	1.05453e-37	0.267415	0.52	0.281	3.42228e-33	3
G3bp2	1.62578e-31	0.267184	0.883	0.843	5.27614e-27	3
Afdn	2.61589e-25	0.266633	0.453	0.252	8.48935e-21	3
Kndc1	1.19452e-27	0.266614	0.48	0.262	3.87659e-23	3
Akap8l	5.76944e-05	0.265808	0.658	0.538	1	3
Scg5	2.02741e-18	0.265079	0.909	0.759	6.57955e-14	3
Caln1	7.91756e-38	0.264577	0.474	0.243	2.56949e-33	3
Ube2v2	4.24895e-32	0.264567	0.85	0.846	1.37891e-27	3
Tmem179	1.8528e-15	0.264082	0.715	0.526	6.01289e-11	3
Sorcs1	1.00229e-13	0.263941	0.35	0.214	3.25274e-09	3
Stx1a	2.99981e-31	0.263741	0.676	0.494	9.7353e-27	3
Atp5o.1	1.31501e-05	0.263639	0.482	0.472	0.426759	3
Plekha5	3.27208e-15	0.263411	0.52	0.348	1.06189e-10	3
Mal2	1.05282e-41	0.263343	0.48	0.24	3.41673e-37	3
AW551984	3.05944e-24	0.263281	0.794	0.603	9.92881e-20	3
Igsf3	3.70198e-29	0.263192	0.579	0.37	1.2014e-24	3
Sdk2	3.16085e-16	0.263177	0.37	0.226	1.02579e-11	3
Aak1	2.19783e-14	0.263127	0.603	0.446	7.13262e-10	3
Gria4	8.65712e-20	0.262934	0.534	0.345	2.8095e-15	3
Tmem130	4.57809e-20	0.262621	0.812	0.637	1.48573e-15	3
Pnmal2	2.69813e-25	0.262529	0.854	0.705	8.75625e-21	3
Ndrg3	2.27097e-23	0.262252	0.755	0.619	7.36997e-19	3
Ppp2r2c	1.53346e-20	0.262206	0.636	0.498	4.97653e-16	3
Camta1	1.12335e-23	0.26191	0.874	0.82	3.64562e-19	3
Jakmip1	4.24131e-26	0.261713	0.662	0.467	1.37643e-21	3
Gde1	2.22183e-25	0.26161	0.84	0.789	7.2105e-21	3
Plpp4	1.20816e-225	0.26124	0.395	0.048	3.92086e-221	3
Nap1l2	1.25126e-28	0.261201	0.644	0.435	4.06073e-24	3
Cstf2	8.5069e-18	0.260748	0.557	0.377	2.76075e-13	3
Epb41l1	3.96432e-27	0.26045	0.68	0.5	1.28654e-22	3
Blcap	2.571e-29	0.2599	0.87	0.795	8.34368e-25	3
Usp15	3.29679e-15	0.259509	0.551	0.422	1.06991e-10	3
Nap1l3	1.02365e-30	0.259402	0.638	0.443	3.32204e-26	3
Epb41l3	5.66365e-21	0.259319	0.611	0.447	1.83802e-16	3
Tsc22d1	8.91485e-24	0.2591	0.951	0.889	2.89313e-19	3
Prkcg	1.26249e-50	0.259086	0.304	0.098	4.09714e-46	3
Stox2	7.39698e-21	0.258752	0.747	0.555	2.40054e-16	3
Fam110b	1.22624e-24	0.258698	0.674	0.509	3.97952e-20	3
Lin7a	2.16843e-30	0.258097	0.595	0.373	7.03722e-26	3
2900055J20Rik	7.05667e-09	0.257125	0.387	0.281	0.00022901	3
Clcn3	1.68575e-13	0.256723	0.763	0.632	5.47076e-09	3
Rimklb	1.19113e-28	0.256431	0.702	0.545	3.86558e-24	3
Vamp2	1.63628e-27	0.25596	0.927	0.853	5.31022e-23	3
Sfswap	2.18719e-11	0.255455	0.648	0.5	7.09809e-07	3
Tmem158	2.7001e-28	0.255358	0.735	0.541	8.76263e-24	3
Nceh1	1.66676e-50	0.25528	0.417	0.167	5.40913e-46	3
Alg2	3.77653e-25	0.255274	0.832	0.73	1.2256e-20	3
Selenot	1.47956e-14	0.255133	0.492	0.375	4.80163e-10	3
Slc2a13	2.81881e-71	0.254634	0.387	0.122	9.14788e-67	3
Rims2	1.15365e-08	0.25426	0.526	0.373	0.000374393	3
Mab21l1	3.13288e-283	0.254006	0.368	0.032	1.01671e-278	3
Tro	9.08556e-10	0.253843	0.729	0.58	2.94854e-05	3
Lhfpl3	5.83988e-80	0.253785	0.447	0.149	1.89522e-75	3
Fjx1	6.89747e-65	0.253547	0.504	0.202	2.23844e-60	3
Pkd1	7.28844e-11	0.253359	0.435	0.296	2.36532e-06	3
Sel1l	8.39125e-15	0.253172	0.654	0.507	2.72321e-10	3
March6	2.61297e-17	0.253033	0.755	0.693	8.47988e-13	3
Arhgef12	4.08787e-23	0.252916	0.648	0.456	1.32664e-18	3
Lgi1	6.61353e-38	0.252509	0.455	0.221	2.14629e-33	3
Nectin1	3.70326e-56	0.252381	0.401	0.152	1.20182e-51	3
Myo9a	8.68072e-10	0.252062	0.613	0.495	2.81716e-05	3
Reep5	4.70562e-26	0.251966	0.913	0.926	1.52711e-21	3
Fsd1	1.43852e-28	0.251905	0.755	0.576	4.66843e-24	3
Cpeb4	8.37047e-20	0.251635	0.64	0.488	2.71647e-15	3
Rnf182	2.70313e-76	0.251427	0.512	0.177	8.77247e-72	3
Vezt	1.20832e-13	0.251065	0.676	0.52	3.92137e-09	3
Ptprg	7.80044e-31	0.251023	0.547	0.305	2.53148e-26	3
Cpe	6.10168e-38	0.250737	0.968	0.885	1.98018e-33	3
Nhs	1.54259e-47	0.250453	0.482	0.228	5.00616e-43	3
Cacng3	7.60173e-172	0.250427	0.364	0.055	2.46699e-167	3
Arnt2	2.45209e-32	0.250102	0.658	0.452	7.95778e-28	3
Fam69b	2.62764e-28	0.250097	0.802	0.695	8.52747e-24	3

## Sheet: Cluster 4
Figure 1-source data 2. Feature genes that define each of the 11 Pomc clusters
integrated across all six developmental stages.
The data are sorted from highest to lowest for each integrated custer by average log fold-change > 0.25
(avg_logFC) of gene expression in the featured cluster relative to all other clusters
pct.1, Percentage of cells in the indicated cluster with significant differential gene expression
pct.2, Percentage of cells in all other clusters with significant differential gene expression
p-val, p-value
p_val_adj, adjusted p-value for multiple comparisons
The Wilcoxon test was performed to identify the differentially expressed genes in each cluster
Gene	p_val	avg_logFC	pct.1	pct.2	p_val_adj	cluster
Npy	6.46204e-184	2.71673	0.465	0.149	2.09713e-179	4
Sst	1.81509e-202	2.47107	0.343	0.07	5.89051e-198	4
Otp	0	2.40403	0.963	0.066	0	4
Dlk1	0	1.76925	0.988	0.499	0	4
Agrp	1.40612e-212	1.7529	0.322	0.058	4.56329e-208	4
Cited1	2.38828e-267	1.61181	0.827	0.458	7.75068e-263	4
Calcr	0	1.05377	0.636	0.118	0	4
Peg10	0	1.04082	0.954	0.585	0	4
Isl1	1.60885e-233	0.933379	0.943	0.506	5.2212e-229	4
Wbp5	7.13576e-220	0.913925	0.826	0.43	2.31577e-215	4
Tbca	0	0.895413	0.996	0.955	0	4
Cbln4	3.89806e-261	0.89049	0.446	0.093	1.26504e-256	4
Ngfrap1	2.61147e-218	0.862954	0.834	0.438	8.47502e-214	4
Magel2	6.79153e-161	0.736997	0.821	0.532	2.20406e-156	4
Six6	7.61537e-208	0.730618	0.844	0.4	2.47141e-203	4
Tceb2	7.77824e-152	0.681645	0.832	0.439	2.52427e-147	4
Cxx1a	1.36099e-158	0.668728	0.799	0.418	4.41681e-154	4
Slc32a1	0	0.62443	0.555	0.072	0	4
Hn1	2.68388e-116	0.621971	0.833	0.439	8.71001e-112	4
Myeov2	3.30595e-151	0.621912	0.808	0.427	1.07288e-146	4
Shfm1	5.15985e-150	0.621097	0.821	0.43	1.67453e-145	4
Tshz2	1.07049e-141	0.614648	0.715	0.409	3.47407e-137	4
2900055J20Rik	2.15757e-149	0.61404	0.582	0.264	7.00197e-145	4
Gm9843	8.63588e-130	0.604486	0.71	0.373	2.8026e-125	4
Ndn	1.88908e-41	0.596683	0.837	0.774	6.13062e-37	4
Rpl13a	1.6971e-94	0.574869	0.962	0.814	5.50761e-90	4
Hmgn1	5.81004e-168	0.570587	0.996	0.966	1.88553e-163	4
Rps27rt	1.65213e-122	0.566675	0.85	0.643	5.36165e-118	4
Tox2	1.03922e-159	0.563477	0.879	0.584	3.37258e-155	4
Selk	8.12423e-123	0.561691	0.821	0.435	2.63656e-118	4
Cxx1b	1.85485e-132	0.559667	0.728	0.386	6.01953e-128	4
Klhdc8b	2.32953e-133	0.542109	0.913	0.717	7.56001e-129	4
Efna5	4.1448e-106	0.537801	0.849	0.615	1.34511e-101	4
Snrpg	2.05545e-147	0.53758	0.985	0.924	6.67054e-143	4
Rps14	3.74508e-155	0.519155	0.999	0.993	1.21539e-150	4
Hist3h2ba	2.31618e-100	0.517817	0.944	0.747	7.5167e-96	4
Rpl23a	9.00857e-112	0.510629	0.992	0.95	2.92355e-107	4
Zfos1	2.61191e-117	0.508367	0.741	0.391	8.47643e-113	4
Rpl23a-ps3	2.29288e-110	0.508057	0.678	0.363	7.44108e-106	4
Rpl9-ps6	1.18776e-83	0.50615	0.635	0.397	3.85464e-79	4
Ntm	2.61111e-79	0.49978	0.793	0.585	8.47383e-75	4
Ap3b1	1.72126e-120	0.495196	0.593	0.314	5.586e-116	4
2310036O22Rik	4.84824e-112	0.494762	0.774	0.418	1.5734e-107	4
Sox11	1.44251e-90	0.492537	0.962	0.73	4.68139e-86	4
Celf3	1.62318e-113	0.485132	0.897	0.703	5.26771e-109	4
Rps15	1.53086e-112	0.483296	0.997	0.966	4.9681e-108	4
Ssbp2	1.71715e-114	0.477624	0.9	0.736	5.57266e-110	4
Wdr89	2.69705e-77	0.468175	0.778	0.619	8.75274e-73	4
Cpa4	4.40118e-227	0.462577	0.309	0.048	1.42831e-222	4
Gm8730	1.23619e-85	0.460544	0.625	0.345	4.0118e-81	4
Nhp2l1	1.17975e-102	0.460287	0.763	0.413	3.82865e-98	4
Grcc10	2.21751e-92	0.44988	0.843	0.717	7.19647e-88	4
H3f3b	1.99296e-110	0.446491	0.999	0.997	6.46775e-106	4
Mad2l2	2.86372e-80	0.443552	0.685	0.488	9.29361e-76	4
Sepw1	7.91484e-72	0.441738	0.834	0.439	2.5686e-67	4
Rpl27	1.08014e-127	0.439981	0.995	0.978	3.50538e-123	4
0610011F06Rik	3.07179e-115	0.438368	0.538	0.246	9.96887e-111	4
Hnrnpk	6.32233e-83	0.438184	0.998	0.991	2.05178e-78	4
Ecel1	1.10959e-87	0.437309	0.497	0.244	3.60095e-83	4
Malat1	2.03904e-98	0.435691	1	0.999	6.6173e-94	4
Rpl6l	6.24369e-86	0.431093	0.557	0.3	2.02627e-81	4
2210013O21Rik	3.97926e-78	0.430767	0.614	0.358	1.29139e-73	4
Fam183b	2.2955e-91	0.42883	0.686	0.426	7.44959e-87	4
Marcksl1	4.53813e-119	0.427932	1	0.962	1.47276e-114	4
Erh	1.08338e-105	0.426498	0.99	0.916	3.51591e-101	4
Maged1	2.8416e-93	0.426056	0.995	0.931	9.22184e-89	4
Tub	1.35449e-101	0.42499	0.828	0.63	4.39572e-97	4
Hap1	3.02827e-97	0.424612	0.977	0.792	9.82764e-93	4
Gnb2l1	1.15588e-75	0.418204	0.821	0.436	3.75116e-71	4
Rpl10-ps3	1.21781e-44	0.417069	0.653	0.516	3.95214e-40	4
Hmgn2	3.07938e-114	0.411528	0.968	0.896	9.9935e-110	4
Rpl31	9.1293e-96	0.407809	0.995	0.974	2.96273e-91	4
Rpl27-ps3	1.17109e-65	0.40705	0.616	0.432	3.80054e-61	4
Ppdpf	1.63982e-99	0.405447	0.964	0.836	5.3217e-95	4
Rps17	3.85115e-106	0.402654	0.997	0.974	1.24981e-101	4
Gm10076	8.99893e-67	0.399022	0.917	0.852	2.92042e-62	4
Tonsl	1.23952e-73	0.396815	0.707	0.448	4.02262e-69	4
C77370	3.1274e-107	0.396755	0.427	0.161	1.01494e-102	4
Gm11808	8.47747e-48	0.395427	0.751	0.665	2.75119e-43	4
Gm10116	5.82664e-82	0.395205	0.529	0.275	1.89092e-77	4
Sub1	4.79012e-145	0.39085	0.997	0.978	1.55454e-140	4
Gm9493	5.92944e-58	0.389903	0.654	0.483	1.92428e-53	4
2700060E02Rik	1.82588e-74	0.388569	0.772	0.427	5.92552e-70	4
Syt1	3.45235e-84	0.387339	0.82	0.552	1.12039e-79	4
Ube2b	1.54085e-118	0.382779	0.976	0.929	5.00053e-114	4
Hdgfrp3	4.71871e-77	0.382452	0.693	0.393	1.53136e-72	4
Btf3l4	7.58231e-73	0.382298	0.835	0.641	2.46069e-68	4
Rbm4b	1.07537e-72	0.381899	0.891	0.783	3.48989e-68	4
Tceb1	2.36434e-78	0.381805	0.733	0.413	7.67298e-74	4
Rgag4	6.48269e-123	0.377542	0.433	0.155	2.10383e-118	4
Gm8186	1.29361e-65	0.374903	0.681	0.53	4.19814e-61	4
Bex2	5.82082e-90	0.373807	0.999	0.938	1.88903e-85	4
Cnih2	1.10913e-77	0.371352	0.973	0.819	3.59945e-73	4
PISD	2.23685e-57	0.37102	0.478	0.266	7.25925e-53	4
Dpcd	5.50994e-89	0.370682	0.454	0.209	1.78814e-84	4
Gad1	1.88406e-93	0.370004	0.512	0.242	6.11433e-89	4
Phip	4.62901e-55	0.369535	0.859	0.763	1.50225e-50	4
Zdbf2	8.32496e-72	0.366794	0.874	0.669	2.7017e-67	4
Ctxn1	2.94978e-72	0.36661	0.933	0.785	9.57291e-68	4
Snrpf	1.01832e-101	0.365789	0.967	0.908	3.30476e-97	4
Gltscr2	2.40766e-75	0.365542	0.623	0.358	7.81358e-71	4
Rps27	1.53105e-112	0.362566	0.999	0.993	4.96872e-108	4
Sbk1	6.51571e-66	0.36141	0.866	0.654	2.11454e-61	4
Gm9844	8.11602e-37	0.361324	0.44	0.292	2.63389e-32	4
Erdr1	1.19974e-71	0.36115	0.526	0.28	3.89352e-67	4
RP24-236C17.2	9.7589e-123	0.359064	0.469	0.169	3.16706e-118	4
Tmem255a	1.13241e-42	0.358994	0.362	0.208	3.67501e-38	4
Usmg5	1.56084e-92	0.356764	0.989	0.943	5.06539e-88	4
Cirbp	5.00199e-97	0.35481	0.992	0.94	1.62329e-92	4
1500035N22Rik	2.41e-75	0.353361	0.442	0.223	7.82118e-71	4
Cntfr	1.52982e-46	0.351999	0.594	0.452	4.96472e-42	4
Tagln3	6.37378e-81	0.351304	0.975	0.797	2.06848e-76	4
Hmgn3	4.22608e-69	0.348105	0.865	0.649	1.37149e-64	4
Gm2000	1.89331e-42	0.348009	0.596	0.469	6.14436e-38	4
Mageh1	1.40149e-68	0.347973	0.871	0.73	4.54827e-64	4
Mfap2	6.69696e-69	0.345449	0.651	0.453	2.17337e-64	4
Tra2b	6.77911e-66	0.345205	0.909	0.853	2.20002e-61	4
Klhdc10	1.0487e-65	0.344606	0.685	0.535	3.40334e-61	4
Cdk4	4.93336e-43	0.344544	0.919	0.863	1.60102e-38	4
Ptov1	1.43373e-98	0.343663	0.997	0.971	4.65287e-94	4
Sep15	3.16586e-68	0.343053	0.744	0.418	1.02742e-63	4
Cd24a	7.41658e-62	0.341295	0.846	0.513	2.4069e-57	4
mt-Nd1	2.38183e-101	0.340729	1	0.999	7.72977e-97	4
Sox21	1.49004e-75	0.336075	0.355	0.145	4.83564e-71	4
Dynlt1c	2.34526e-70	0.335753	0.499	0.269	7.61106e-66	4
Gabra5	7.64342e-50	0.33465	0.624	0.435	2.48052e-45	4
Tmem108	1.93693e-61	0.332363	0.562	0.371	6.28593e-57	4
Efnb3	1.40347e-58	0.330272	0.867	0.704	4.55467e-54	4
Map2	4.63431e-65	0.328776	0.942	0.801	1.50397e-60	4
Asb4	2.95567e-47	0.328745	0.646	0.441	9.59205e-43	4
6330403K07Rik	5.46405e-68	0.323354	0.992	0.901	1.77325e-63	4
H2afv	4.63545e-45	0.322888	0.86	0.824	1.50434e-40	4
Ndufa3	2.20997e-71	0.322829	0.96	0.925	7.17201e-67	4
Dusp8	1.46672e-37	0.321462	0.675	0.56	4.75993e-33	4
Ndufa6	9.91162e-74	0.319642	0.95	0.923	3.21662e-69	4
Rps25	1.28145e-82	0.319433	0.996	0.981	4.15867e-78	4
Fam195b	3.20346e-63	0.31866	0.69	0.394	1.03962e-58	4
Eef1g	7.55831e-72	0.314719	0.996	0.971	2.4529e-67	4
Gm8797	8.3521e-54	0.311127	0.53	0.359	2.71051e-49	4
Rps28	1.4765e-77	0.310379	0.998	0.991	4.7917e-73	4
Foxp1	2.06148e-08	0.308045	0.512	0.513	0.000669013	4
Cnot7	2.11268e-58	0.305889	0.84	0.738	6.8563e-54	4
Nol4	1.96419e-50	0.304817	0.511	0.34	6.3744e-46	4
Sox4	9.14168e-12	0.304433	0.867	0.872	2.96675e-07	4
Fam134a	7.72801e-59	0.304032	0.56	0.324	2.50797e-54	4
Gck	1.21266e-59	0.303817	0.562	0.368	3.93546e-55	4
Tox	2.55072e-34	0.303579	0.558	0.427	8.27784e-30	4
Rpl13-ps3	3.94441e-58	0.301849	0.341	0.156	1.28008e-53	4
Rbm39	1.08365e-60	0.301325	0.984	0.975	3.51677e-56	4
Hnrnpc	3.68302e-58	0.301182	0.932	0.884	1.19525e-53	4
Gstp1	2.02608e-30	0.301167	0.652	0.59	6.57524e-26	4
Tia1	3.78104e-51	0.300605	0.883	0.818	1.22706e-46	4
Pde2a	1.25864e-100	0.3005	0.29	0.086	4.08466e-96	4
Dbpht2	3.92119e-48	0.299739	0.566	0.372	1.27255e-43	4
Rpl4	1.40848e-79	0.299442	0.998	0.987	4.57095e-75	4
Morf4l2	1.847e-56	0.299336	0.978	0.92	5.99407e-52	4
Whsc1l1	2.77154e-52	0.298552	0.452	0.257	8.99449e-48	4
Lmo1	5.58687e-43	0.298335	0.287	0.141	1.81311e-38	4
Pnck	6.70137e-42	0.2976	0.697	0.58	2.1748e-37	4
Oaz2	9.47534e-57	0.295173	0.907	0.797	3.07503e-52	4
Irf2bpl	1.46632e-36	0.295104	0.808	0.736	4.75865e-32	4
Fkbp4	2.2122e-59	0.294264	0.95	0.888	7.17927e-55	4
Fam216a	9.37699e-61	0.293447	0.856	0.721	3.04311e-56	4
Hsph1	6.58327e-40	0.293287	0.659	0.543	2.13647e-35	4
Nrsn2	7.3832e-45	0.290247	0.752	0.595	2.39607e-40	4
Peg3	1.23858e-61	0.289317	0.983	0.827	4.01957e-57	4
1700086L19Rik	2.26415e-173	0.289315	0.271	0.046	7.34784e-169	4
Rpl17	2.06529e-71	0.288135	0.996	0.984	6.70248e-67	4
Sumo1	3.29595e-87	0.287161	0.976	0.942	1.06963e-82	4
Anapc13	2.30932e-39	0.28662	0.8	0.763	7.49444e-35	4
Ptp4a1	3.68362e-54	0.286493	0.928	0.845	1.19544e-49	4
Cacfd1	3.37797e-47	0.286341	0.748	0.642	1.09625e-42	4
Ubb	2.12017e-79	0.28619	1	1	6.8806e-75	4
Ict1	2.06688e-54	0.286155	0.564	0.333	6.70763e-50	4
Cdk5r1	1.86407e-40	0.285964	0.879	0.769	6.04948e-36	4
Camk2n1	8.79706e-36	0.285639	0.821	0.726	2.85491e-31	4
Dfna5	4.68788e-56	0.284401	0.337	0.159	1.52136e-51	4
St8sia4	1.04898e-44	0.283646	0.431	0.265	3.40426e-40	4
Gm10250	6.43344e-51	0.283592	0.367	0.189	2.08784e-46	4
H3f3a	1.30431e-65	0.281549	0.999	0.995	4.23289e-61	4
Hmgb1	7.72522e-82	0.281518	0.996	0.982	2.50707e-77	4
Ndufa2	2.81939e-64	0.280674	0.968	0.95	9.14978e-60	4
Whsc1	9.90845e-44	0.279795	0.487	0.3	3.21559e-39	4
2810428I15Rik	4.33003e-45	0.277652	0.582	0.365	1.40522e-40	4
Celf5	2.28207e-52	0.277271	0.866	0.705	7.406e-48	4
Pafah1b2	4.39177e-57	0.276732	0.927	0.831	1.42526e-52	4
Sh3bp1	8.575e-34	0.276384	0.591	0.443	2.78285e-29	4
Nrxn3	5.58681e-46	0.2757	0.685	0.466	1.81309e-41	4
Negr1	3.66774e-37	0.275332	0.753	0.608	1.19029e-32	4
Rundc3a	8.66155e-53	0.274287	0.903	0.754	2.81093e-48	4
Hdac2	6.95001e-47	0.27375	0.93	0.832	2.25549e-42	4
Jam3	8.34634e-39	0.273707	0.603	0.476	2.70864e-34	4
Rcan2	4.26009e-43	0.273548	0.721	0.583	1.38253e-38	4
Eif4a2	3.56193e-64	0.273499	0.986	0.95	1.15595e-59	4
BC029214	5.70147e-49	0.273025	0.438	0.248	1.8503e-44	4
Gm1673	4.25731e-54	0.272717	0.998	0.922	1.38162e-49	4
Nono	1.39124e-45	0.272073	0.947	0.902	4.515e-41	4
Rps6	4.52953e-62	0.269539	0.997	0.983	1.46997e-57	4
Ubqln2	1.64145e-50	0.268651	0.882	0.788	5.32698e-46	4
1810026J23Rik	5.2666e-54	0.268144	0.424	0.231	1.70917e-49	4
Samd14	2.97623e-41	0.267823	0.821	0.707	9.65877e-37	4
Gm10073	2.59056e-25	0.266351	0.503	0.398	8.40715e-21	4
Bhlhb9	5.91373e-37	0.26619	0.757	0.672	1.91918e-32	4
Cox7c	4.41817e-77	0.265662	0.999	0.989	1.43383e-72	4
Cyth2	7.93021e-37	0.265229	0.861	0.78	2.57359e-32	4
Rps18-ps3	8.09042e-48	0.264938	0.32	0.154	2.62559e-43	4
Atxn7l3b	2.12223e-58	0.264247	0.992	0.937	6.88727e-54	4
Dynll2	1.50184e-49	0.262858	0.968	0.912	4.87392e-45	4
Pfdn4	3.5369e-43	0.262412	0.862	0.791	1.14783e-38	4
Gm561	2.33392e-42	0.260945	0.429	0.255	7.57428e-38	4
Apbb2	3.78248e-32	0.260936	0.606	0.512	1.22753e-27	4
Ip6k2	1.99342e-46	0.260444	0.792	0.692	6.46925e-42	4
Tmsb10	1.33873e-32	0.2604	1	0.989	4.34457e-28	4
Chd3os	1.40186e-38	0.260254	0.851	0.709	4.54947e-34	4
1500011B03Rik	5.49878e-39	0.259874	0.842	0.733	1.78452e-34	4
Rplp2	3.97959e-76	0.259492	0.998	0.992	1.2915e-71	4
Meg3	4.37456e-53	0.257472	0.991	0.963	1.41968e-48	4
Scn3a	1.0358e-39	0.256158	0.717	0.587	3.36147e-35	4
Phpt1	1.14266e-30	0.256151	0.647	0.589	3.70829e-26	4
Polr2f	7.05196e-44	0.255449	0.916	0.862	2.28857e-39	4
Brwd1	4.08422e-40	0.255386	0.842	0.762	1.32545e-35	4
Pcsk2	3.37408e-36	0.25531	0.515	0.342	1.09499e-31	4
Traf4	3.7505e-28	0.254559	0.633	0.505	1.21715e-23	4
Pja1	1.48734e-42	0.254454	0.891	0.809	4.82685e-38	4
Celf6	3.5755e-38	0.254231	0.786	0.632	1.16036e-33	4
Apoa1bp	8.14675e-46	0.253947	0.506	0.306	2.64386e-41	4
Lsm8	1.10018e-30	0.253941	0.695	0.635	3.57042e-26	4
Rsrc2	4.38074e-40	0.253892	0.865	0.837	1.42168e-35	4
Rpl41	4.16411e-73	0.253871	1	0.999	1.35138e-68	4
Romo1	4.3779e-52	0.253712	0.958	0.924	1.42076e-47	4
Nat14	1.56952e-40	0.253706	0.592	0.452	5.09358e-36	4
Six3	2.86618e-40	0.252063	0.778	0.488	9.3016e-36	4
Eif4g2	1.06888e-56	0.25161	0.997	0.981	3.46882e-52	4
Prkar1a	8.20972e-55	0.251335	0.955	0.924	2.6643e-50	4
Dynlrb1	2.68189e-59	0.251272	0.986	0.939	8.70354e-55	4
Ndufv3	5.76173e-40	0.251045	0.948	0.92	1.86985e-35	4
1110001J03Rik	1.50019e-34	0.250555	0.528	0.345	4.86856e-30	4

## Sheet: Cluster 5
Figure 1-source data 2. Feature genes that define each of the 11 Pomc clusters
integrated across all six developmental stages.
The data are sorted from highest to lowest for each integrated custer by average log fold-change > 0.25
(avg_logFC) of gene expression in the featured cluster relative to all other clusters
pct.1, Percentage of cells in the indicated cluster with significant differential gene expression
pct.2, Percentage of cells in all other clusters with significant differential gene expression
p-val, p-value
p_val_adj, adjusted p-value for multiple comparisons
The Wilcoxon test was performed to identify the differentially expressed genes in each cluster
Gene	p_val	avg_logFC	pct.1	pct.2	p_val_adj	cluster
Tac2	0	3.02309	0.742	0.139	0	5
Ap1s2	0	1.26107	0.944	0.705	0	5
Scg2	0	1.18588	0.856	0.562	0	5
Pgrmc1	0	1.13366	1	0.926	0	5
Rprm	2.82059e-204	1.0529	0.702	0.473	9.15368e-200	5
Sox14	0	0.966055	0.892	0.179	0	5
Gm27199	0	0.961265	0.823	0.083	0	5
Olfm2	1.38256e-306	0.934039	0.696	0.351	4.48683e-302	5
Kcnk2	0	0.884194	0.889	0.488	0	5
Mrps11	0	0.875017	0.921	0.624	0	5
Lhx5	0	0.872373	0.816	0.091	0	5
Pcdh19	0	0.843849	0.77	0.415	0	5
Snhg11	1.1091e-302	0.841549	0.924	0.801	3.59938e-298	5
Tmem35a	0	0.830258	0.588	0.137	0	5
Nhlh2	0	0.799468	0.931	0.51	0	5
App	0	0.779795	0.977	0.849	0	5
Chgb	0	0.746865	0.933	0.64	0	5
Pcdh11x	8.90837e-285	0.721602	0.573	0.233	2.89103e-280	5
Sphkap	0	0.70891	0.612	0.124	0	5
Kcnd2	0	0.681073	0.732	0.37	0	5
Ahi1	0	0.678584	0.975	0.795	0	5
Tmem158	1.77933e-190	0.661103	0.75	0.518	5.77446e-186	5
B630019K06Rik	2.84616e-290	0.659621	0.942	0.665	9.23663e-286	5
Esr1	0	0.659558	0.609	0.138	0	5
Jpt1	1.82311e-141	0.622762	0.681	0.462	5.91653e-137	5
Pcdh10	2.90838e-253	0.619858	0.743	0.457	9.43857e-249	5
Meg3	0	0.618334	0.998	0.96	0	5
Nell1	0	0.616693	0.656	0.239	0	5
Nr5a2	0	0.602754	0.53	0.131	0	5
Pcdh7	1.4843e-292	0.600827	0.757	0.403	4.81699e-288	5
Pcp4	3.82052e-228	0.597635	0.886	0.582	1.23987e-223	5
Gria1	0	0.59665	0.83	0.447	0	5
Mrap2	0	0.592983	0.561	0.173	0	5
Tmem163	0	0.589204	0.794	0.309	0	5
Resp18	2.15616e-201	0.58893	0.926	0.725	6.99739e-197	5
Trpc5	0	0.583551	0.592	0.128	0	5
Bex3	9.2173e-101	0.57462	0.686	0.454	2.99129e-96	5
Ar	0	0.572202	0.586	0.204	0	5
Pcsk1n	1.14177e-290	0.571954	1	0.953	3.7054e-286	5
Caly	1.85712e-217	0.567329	0.926	0.683	6.02692e-213	5
Etnk2	0	0.563664	0.613	0.213	0	5
Ldb2	0	0.560883	0.693	0.323	0	5
Edil3	5.62151e-259	0.559713	0.679	0.351	1.82435e-254	5
Hap1	1.85026e-283	0.553558	0.981	0.778	6.00465e-279	5
Pdcd4	6.38315e-224	0.55293	0.746	0.488	2.07152e-219	5
Hs3st4	0	0.547314	0.546	0.112	0	5
Zdbf2	2.73885e-267	0.547199	0.929	0.647	8.88837e-263	5
Pnmal1	2.55767e-265	0.546724	0.811	0.506	8.30041e-261	5
Htatsf1	1.19613e-260	0.546451	0.777	0.538	3.88181e-256	5
Ntrk3	5.40084e-284	0.538627	0.72	0.363	1.75274e-279	5
Nap1l5	3.22069e-177	0.533122	0.959	0.86	1.04521e-172	5
Nrp2	8.19927e-276	0.531622	0.755	0.413	2.66091e-271	5
Gkap1	4.26165e-268	0.530771	0.83	0.592	1.38303e-263	5
Tmem47	6.35813e-271	0.523272	0.701	0.359	2.0634e-266	5
Negr1	4.28628e-235	0.511798	0.888	0.579	1.39103e-230	5
Chst2	8.4428e-292	0.505442	0.682	0.291	2.73994e-287	5
Zcchc12	2.16025e-224	0.501573	0.941	0.697	7.01065e-220	5
Ptprd	6.80525e-187	0.499465	0.742	0.494	2.20851e-182	5
Pak3	8.47516e-220	0.49671	0.934	0.711	2.75044e-215	5
Tmx4	4.66738e-249	0.494933	0.923	0.709	1.51471e-244	5
Sdc2	9.49173e-212	0.4923	0.577	0.286	3.08035e-207	5
Eef1a2	1.85024e-214	0.48739	0.878	0.618	6.00459e-210	5
Adgrl3	1.38654e-228	0.483737	0.834	0.556	4.49974e-224	5
C1qtnf4	6.3931e-219	0.481972	0.91	0.662	2.07475e-214	5
Camk4	8.24093e-252	0.470607	0.624	0.301	2.67443e-247	5
Kcnip4	0	0.47006	0.565	0.189	0	5
Prrc2c	1.9846e-208	0.468459	0.893	0.793	6.44064e-204	5
Wdr6	9.03061e-250	0.468316	0.934	0.761	2.9307e-245	5
Cadm1	3.88058e-227	0.464331	0.901	0.673	1.25936e-222	5
Scg5	1.13221e-211	0.462461	0.942	0.739	3.67435e-207	5
Ptprg	3.43335e-213	0.460931	0.571	0.276	1.11422e-208	5
Brinp1	2.17602e-208	0.459807	0.783	0.502	7.06185e-204	5
Pik3r1	3.71972e-118	0.459613	0.812	0.643	1.20716e-113	5
Chl1	1.17364e-217	0.456611	0.782	0.434	3.8088e-213	5
Elob	2.34467e-92	0.455724	0.684	0.495	7.60916e-88	5
Tceal9	7.95272e-128	0.455626	0.676	0.42	2.5809e-123	5
Syt1	8.47911e-221	0.455318	0.852	0.528	2.75173e-216	5
Tbx3	1.4864e-211	0.453995	0.866	0.454	4.8238e-207	5
Map2	1.0612e-245	0.452726	0.967	0.787	3.44391e-241	5
Fam155a	2.63551e-229	0.452525	0.786	0.493	8.55303e-225	5
Zbtb20	1.57762e-137	0.45224	0.915	0.731	5.11986e-133	5
Tubb2a	1.45254e-141	0.451986	0.981	0.972	4.71394e-137	5
Brinp3	1.57374e-291	0.450117	0.598	0.229	5.10727e-287	5
Unc5d	2.71229e-217	0.448382	0.729	0.384	8.80219e-213	5
Tusc3	2.73107e-193	0.447367	0.92	0.774	8.86313e-189	5
Ly6h	8.41581e-204	0.441583	0.999	0.894	2.73118e-199	5
Nrxn2	1.25305e-218	0.441069	0.965	0.796	4.06651e-214	5
Prlr	3.54017e-193	0.440572	0.488	0.209	1.14889e-188	5
Kcnc1	2.63444e-225	0.436907	0.77	0.472	8.54956e-221	5
Gprasp2	1.76213e-187	0.427052	0.899	0.694	5.71863e-183	5
Dgkb	2.57775e-282	0.42596	0.522	0.181	8.36556e-278	5
Rtl8a	5.74159e-135	0.425463	0.672	0.375	1.86332e-130	5
Arhgap36	8.46441e-117	0.420866	0.323	0.134	2.74695e-112	5
Psd	1.20024e-165	0.409626	0.856	0.614	3.89514e-161	5
Maged1	1.08984e-227	0.408826	0.986	0.928	3.53686e-223	5
Cited2	8.37483e-128	0.407488	0.839	0.632	2.71788e-123	5
Lmna	9.66595e-141	0.40581	0.664	0.431	3.13689e-136	5
Lsamp	4.27781e-171	0.403101	0.87	0.622	1.38828e-166	5
Nptxr	6.71781e-191	0.400206	0.845	0.561	2.18013e-186	5
Nkx2-1	1.01184e-191	0.398803	0.925	0.554	3.28371e-187	5
Snu13	3.82725e-111	0.397815	0.677	0.449	1.24206e-106	5
Selenok	1.44225e-85	0.397447	0.685	0.5	4.68055e-81	5
Lrrn2	6.73922e-178	0.394245	0.762	0.521	2.18708e-173	5
Gprasp1	5.78615e-163	0.393861	0.902	0.748	1.87778e-158	5
Gnb4	1.01642e-147	0.39184	0.734	0.522	3.29858e-143	5
Brinp2	9.03759e-198	0.39087	0.541	0.248	2.93297e-193	5
AW551984	8.06176e-171	0.390705	0.858	0.574	2.61628e-166	5
Basp1	4.12968e-171	0.388493	0.998	0.989	1.34021e-166	5
Eid1	2.75567e-186	0.387273	0.979	0.903	8.94298e-182	5
Bex2	3.84818e-175	0.38722	0.998	0.934	1.24885e-170	5
A730017C20Rik	5.70339e-158	0.384999	0.911	0.672	1.85092e-153	5
Trank1	1.20589e-192	0.38118	0.658	0.365	3.91348e-188	5
Celf6	1.25118e-151	0.380673	0.85	0.612	4.06045e-147	5
B230209E15Rik	1.05677e-156	0.378419	0.63	0.306	3.42954e-152	5
Pdyn	6.5607e-209	0.377588	0.494	0.203	2.12914e-204	5
Crtac1	5.68067e-194	0.376001	0.515	0.232	1.84355e-189	5
Khdrbs2	2.76951e-184	0.371819	0.638	0.348	8.9879e-180	5
Zcchc18	2.49478e-151	0.371648	0.924	0.736	8.0963e-147	5
Fndc3a	5.58271e-133	0.368841	0.735	0.564	1.81176e-128	5
Vwc2	5.20932e-187	0.368797	0.483	0.207	1.69058e-182	5
Rit2	1.09776e-156	0.368793	0.847	0.525	3.56257e-152	5
Scn2a	2.60901e-151	0.36804	0.609	0.305	8.46702e-147	5
Ajap1	2.14859e-168	0.367763	0.512	0.246	6.97283e-164	5
mt-Nd4l	4.23083e-109	0.364981	0.921	0.852	1.37303e-104	5
Spint2	3.76647e-172	0.363111	0.822	0.515	1.22233e-167	5
Scn3a	2.47459e-157	0.361675	0.802	0.565	8.0308e-153	5
Pja1	4.83172e-151	0.360766	0.919	0.799	1.56804e-146	5
Gng4	1.5812e-115	0.358952	0.624	0.412	5.13148e-111	5
Sobp	4.05092e-149	0.35702	0.794	0.581	1.31464e-144	5
Camta1	4.616e-159	0.35579	0.942	0.804	1.49803e-154	5
Prkacb	1.13642e-140	0.354271	0.916	0.762	3.68804e-136	5
Kcnk10	8.07785e-225	0.353277	0.506	0.211	2.6215e-220	5
Nav2	9.61288e-130	0.351828	0.724	0.52	3.11967e-125	5
Plxnc1	1.30066e-152	0.350764	0.681	0.427	4.22103e-148	5
Sema6a	2.23839e-136	0.349707	0.752	0.537	7.26424e-132	5
Mum1l1	4.69249e-166	0.349006	0.423	0.178	1.52285e-161	5
Chd5	6.15638e-149	0.348631	0.715	0.444	1.99793e-144	5
Pdxp	1.29422e-122	0.348227	0.66	0.354	4.20013e-118	5
Ppp3ca	5.9927e-149	0.347446	0.928	0.855	1.94481e-144	5
Sorcs3	1.3706e-219	0.347176	0.491	0.19	4.448e-215	5
Cntn5	2.16817e-174	0.346954	0.426	0.167	7.03635e-170	5
Mageh1	1.89176e-147	0.34609	0.898	0.717	6.13933e-143	5
Zwint	4.07083e-145	0.345064	0.976	0.931	1.32111e-140	5
Msi2	1.47037e-147	0.343156	0.805	0.598	4.7718e-143	5
Tmem130	4.74153e-128	0.342809	0.871	0.61	1.53877e-123	5
Adcy1	1.30191e-186	0.341865	0.445	0.179	4.22508e-182	5
Dgkk	7.37609e-126	0.341677	0.501	0.253	2.39376e-121	5
6330403K07Rik	3.5615e-156	0.340935	0.996	0.895	1.15581e-151	5
Fat1	7.56171e-244	0.339992	0.441	0.142	2.454e-239	5
Ramp3	1.67237e-302	0.33925	0.33	0.062	5.42733e-298	5
Trir	7.31596e-86	0.33616	0.672	0.463	2.37425e-81	5
Arxes1	1.95394e-128	0.335529	0.865	0.68	6.34112e-124	5
Dnajc12	1.13172e-137	0.335474	0.595	0.367	3.67278e-133	5
Gadd45g	6.35473e-79	0.334179	0.611	0.422	2.0623e-74	5
Efnb1	4.33848e-86	0.332883	0.597	0.419	1.40797e-81	5
Ank3	7.52513e-142	0.332409	0.943	0.739	2.44213e-137	5
Cd200	4.09245e-137	0.331312	0.938	0.721	1.32812e-132	5
Ncam1	5.21895e-125	0.330969	0.994	0.863	1.69371e-120	5
mt-Atp8	2.5571e-91	0.329561	0.789	0.643	8.29855e-87	5
Ptprs	1.78536e-129	0.329503	0.898	0.795	5.79403e-125	5
Shisa9	5.02082e-149	0.329487	0.492	0.243	1.62941e-144	5
Selenow	4.51122e-52	0.327043	0.684	0.486	1.46403e-47	5
Carmil3	2.38138e-137	0.326241	0.55	0.288	7.7283e-133	5
Fabp3	3.1704e-105	0.325618	0.828	0.621	1.02889e-100	5
Tub	1.23008e-143	0.324994	0.837	0.615	3.99198e-139	5
Cacna2d1	3.3018e-115	0.32499	0.788	0.55	1.07153e-110	5
Pnmal2	1.06126e-122	0.323641	0.893	0.684	3.44409e-118	5
Phldb1	1.14374e-144	0.323272	0.594	0.357	3.71177e-140	5
Dner	1.81866e-133	0.322606	0.882	0.687	5.90211e-129	5
Csmd1	4.14292e-245	0.320099	0.397	0.113	1.3445e-240	5
Gria2	5.23451e-125	0.319797	0.937	0.704	1.69875e-120	5
Tmem59l	3.72691e-107	0.319595	0.696	0.474	1.20949e-102	5
Srgap3	1.99678e-130	0.319316	0.729	0.527	6.48016e-126	5
Slc17a6	2.53793e-138	0.319128	0.638	0.368	8.23636e-134	5
Rtn1	2.21699e-113	0.318388	1	0.941	7.19479e-109	5
Mal2	1.45147e-143	0.318116	0.457	0.218	4.71047e-139	5
Mir670hg	6.2869e-182	0.317272	0.423	0.167	2.04029e-177	5
Nav1	1.1036e-120	0.316731	0.891	0.726	3.58151e-116	5
Jam3	3.43539e-118	0.316334	0.661	0.459	1.11489e-113	5
Calm2	4.00611e-204	0.316173	0.999	0.996	1.3001e-199	5
Celf5	2.61495e-132	0.31603	0.89	0.69	8.48631e-128	5
Cmip	3.39345e-127	0.315979	0.921	0.769	1.10128e-122	5
Rgs4	1.57866e-77	0.315707	0.648	0.443	5.12323e-73	5
Hs6st2	1.59734e-69	0.315573	0.611	0.405	5.18384e-65	5
Usp22	7.00779e-129	0.315113	0.921	0.8	2.27424e-124	5
Maged2	1.63362e-104	0.31339	0.894	0.797	5.30158e-100	5
Gucy1b1	1.2865e-125	0.31308	0.49	0.256	4.17509e-121	5
Slc24a5	1.11958e-104	0.312717	0.845	0.677	3.63338e-100	5
Gnb5	3.16937e-128	0.312228	0.561	0.3	1.02856e-123	5
Slc38a2	1.65203e-98	0.311836	0.848	0.771	5.36134e-94	5
Rnf138rt1	1.65514e-107	0.30983	0.487	0.26	5.37142e-103	5
Cadps	1.91412e-106	0.309534	0.717	0.514	6.21191e-102	5
Hdgfl3	1.84958e-128	0.308922	0.601	0.309	6.00243e-124	5
Add3	8.0588e-146	0.30796	0.574	0.324	2.61532e-141	5
Grin2a	5.54697e-163	0.307689	0.432	0.181	1.80016e-158	5
Tmem178b	1.01876e-123	0.306524	0.649	0.419	3.3062e-119	5
Syn2	2.30598e-74	0.306493	0.647	0.436	7.48361e-70	5
Pim3	1.58704e-96	0.306267	0.698	0.541	5.15043e-92	5
Plekha6	3.94384e-152	0.306062	0.542	0.293	1.27989e-147	5
Clec2l	3.44202e-102	0.305471	0.623	0.411	1.11704e-97	5
Pfkp	9.20046e-102	0.305322	0.658	0.469	2.98582e-97	5
Fam171b	1.42025e-117	0.305044	0.858	0.655	4.60913e-113	5
Podxl2	7.83859e-121	0.304996	0.962	0.833	2.54386e-116	5
Jakmip1	2.15616e-108	0.3044	0.654	0.448	6.99738e-104	5
Atp1b1	4.98034e-80	0.30404	0.892	0.761	1.61627e-75	5
Dtd1	6.1159e-113	0.303791	0.814	0.631	1.98479e-108	5
Ctxn2	4.3909e-137	0.302884	0.591	0.309	1.42498e-132	5
Cdh8	5.27298e-194	0.302549	0.441	0.165	1.71124e-189	5
Cfap36	4.14988e-91	0.302004	0.726	0.591	1.34676e-86	5
C230004F18Rik	6.31416e-136	0.301457	0.501	0.245	2.04914e-131	5
Pcdh9	1.43226e-138	0.300979	0.608	0.35	4.64811e-134	5
Sptbn1	6.78241e-114	0.300883	0.903	0.76	2.2011e-109	5
Ralyl	7.68888e-99	0.300779	0.719	0.508	2.49527e-94	5
Prnp	9.05445e-132	0.300264	0.889	0.689	2.93844e-127	5
Dnm3	6.66699e-106	0.299387	0.624	0.404	2.16364e-101	5
Spock2	2.95633e-105	0.298902	0.727	0.511	9.59419e-101	5
Ttc3	3.24286e-124	0.298116	0.998	0.949	1.0524e-119	5
Slc12a5	9.92994e-111	0.297632	0.714	0.435	3.22256e-106	5
Ndn	3.50067e-39	0.297379	0.832	0.77	1.13607e-34	5
Pcsk1	4.09706e-89	0.297161	0.377	0.198	1.32962e-84	5
Zfhx3	3.18085e-125	0.296765	0.929	0.781	1.03228e-120	5
Pcm1	3.0445e-94	0.295062	0.768	0.64	9.88031e-90	5
Clstn3	7.95012e-94	0.294643	0.695	0.483	2.58005e-89	5
Galnt17	4.14809e-208	0.293833	0.41	0.14	1.34618e-203	5
Lrrc4b	6.56921e-107	0.293529	0.791	0.56	2.13191e-102	5
Sdk2	5.41448e-140	0.293141	0.441	0.201	1.75716e-135	5
Pcbd1	6.4166e-100	0.292939	0.812	0.605	2.08238e-95	5
Dusp26	1.99408e-105	0.29293	0.886	0.642	6.47137e-101	5
Casp3	5.98428e-107	0.29292	0.56	0.342	1.94208e-102	5
Kcnk3	7.50107e-173	0.292652	0.402	0.158	2.43432e-168	5
Galntl6	5.94308e-222	0.292448	0.39	0.123	1.92871e-217	5
Pou2f2	3.93785e-76	0.290795	0.914	0.784	1.27795e-71	5
Nbea	1.07002e-100	0.289537	0.773	0.591	3.47254e-96	5
Fmc1	6.37472e-97	0.289396	0.609	0.354	2.06879e-92	5
Rtl8b	4.556e-101	0.289003	0.627	0.343	1.47856e-96	5
Gnao1	2.23362e-91	0.288696	0.897	0.743	7.24876e-87	5
Tspan6	8.43298e-102	0.287831	0.852	0.681	2.73676e-97	5
Baiap2	1.91945e-110	0.287227	0.472	0.265	6.2292e-106	5
Gaa	1.00974e-55	0.286619	0.715	0.582	3.27693e-51	5
Snrpn	3.18333e-106	0.2866	0.994	0.882	1.03309e-101	5
Nsd2	1.09343e-101	0.286002	0.555	0.33	3.54851e-97	5
Micu3	3.65559e-90	0.285562	0.751	0.561	1.18635e-85	5
Cenpv	2.93001e-101	0.285227	0.633	0.457	9.50877e-97	5
Lrrtm3	2.96317e-109	0.284686	0.543	0.321	9.61637e-105	5
Adgrb3	1.57701e-99	0.284547	0.658	0.474	5.11787e-95	5
Rps6ka6	8.29582e-115	0.284284	0.468	0.252	2.69224e-110	5
Arfgef3	1.85217e-108	0.283709	0.591	0.348	6.01084e-104	5
Vps28	2.12191e-74	0.283565	0.651	0.446	6.88623e-70	5
Astn1	4.90572e-102	0.283532	0.724	0.52	1.59205e-97	5
Frmpd3	9.88725e-143	0.283047	0.377	0.154	3.20871e-138	5
Matr3	5.3856e-139	0.281985	0.976	0.916	1.74779e-134	5
Gabrb1	4.17533e-93	0.281584	0.544	0.332	1.35502e-88	5
Igsf9b	1.81091e-159	0.281548	0.441	0.189	5.87693e-155	5
Ube3a	1.64212e-118	0.280904	0.966	0.878	5.32916e-114	5
Csmd2	2.37784e-131	0.28026	0.494	0.262	7.71681e-127	5
Bex4	2.76975e-100	0.280082	0.938	0.755	8.98868e-96	5
Nsd3	4.9787e-85	0.280048	0.595	0.381	1.61574e-80	5
Ttc9b	4.01532e-104	0.279708	0.91	0.713	1.30309e-99	5
Atp1a3	1.19463e-85	0.278341	0.842	0.681	3.87692e-81	5
Vgf	3.62117e-47	0.276442	0.537	0.371	1.17518e-42	5
Pabpn1	1.51245e-111	0.276339	0.829	0.67	4.90836e-107	5
Lrfn5	1.14073e-63	0.274759	0.537	0.379	3.70202e-59	5
Fstl5	3.3138e-77	0.27407	0.537	0.349	1.07543e-72	5
Gpr27	8.12834e-99	0.273652	0.681	0.474	2.63789e-94	5
Stk26	0	0.273457	0.276	0.032	0	5
Nup62cl	3.82093e-104	0.273109	0.165	0.041	1.24001e-99	5
March9	1.86217e-97	0.272461	0.665	0.467	6.0433e-93	5
Cox7c	1.22962e-168	0.272214	0.996	0.989	3.9905e-164	5
Pxylp1	8.12927e-149	0.272144	0.459	0.212	2.63819e-144	5
Gm42418	2.88909e-61	0.271609	0.798	0.727	9.37595e-57	5
Daam1	1.55975e-84	0.2715	0.657	0.486	5.06184e-80	5
Lmtk3	2.46916e-105	0.271278	0.69	0.47	8.01316e-101	5
Selenom	9.5527e-97	0.27117	0.608	0.349	3.10014e-92	5
Tspyl4	4.92565e-87	0.271098	0.863	0.691	1.59852e-82	5
Ehbp1l1	4.00686e-77	0.270923	0.664	0.474	1.30035e-72	5
Kif1b	5.11425e-96	0.270648	0.919	0.817	1.65973e-91	5
Tacr3	0	0.27039	0.286	0.028	0	5
Hdac11	2.82996e-79	0.269703	0.689	0.524	9.18407e-75	5
Gm5914	6.49668e-112	0.269504	0.544	0.323	2.10837e-107	5
Bex1	3.01939e-88	0.269275	0.976	0.813	9.79884e-84	5
Zcchc11	2.08334e-91	0.268878	0.747	0.602	6.76105e-87	5
Ccl27a	5.16046e-103	0.267609	0.91	0.707	1.67472e-98	5
Vat1l	1.56135e-91	0.267536	0.821	0.602	5.06705e-87	5
Magee1	3.69663e-87	0.266646	0.729	0.584	1.19967e-82	5
Lrrc73	3.09674e-82	0.266399	0.618	0.428	1.00499e-77	5
Miat	3.23544e-87	0.266059	0.683	0.509	1.05e-82	5
Atp1a1	1.14501e-71	0.26594	0.805	0.665	3.71589e-67	5
Snap47	2.13864e-89	0.26539	0.892	0.785	6.94051e-85	5
Sh3gl3	1.74694e-87	0.265385	0.65	0.464	5.66933e-83	5
Zfp462	1.57236e-70	0.2646	0.611	0.449	5.10279e-66	5
Ndufa5	6.93786e-111	0.264435	0.953	0.888	2.25154e-106	5
Atp9a	1.00117e-86	0.26396	0.798	0.611	3.2491e-82	5
Nbdy	1.64533e-70	0.263146	0.655	0.406	5.33958e-66	5
Mdga2	1.3202e-99	0.261277	0.628	0.397	4.28445e-95	5
Atrx	2.62431e-91	0.261248	0.896	0.825	8.51667e-87	5
Celf4	1.30084e-92	0.261238	0.98	0.814	4.22163e-88	5
Camk2b	8.71925e-87	0.260803	0.706	0.493	2.82966e-82	5
Nop56	1.61508e-66	0.26075	0.803	0.727	5.24142e-62	5
Araf	9.14842e-90	0.259797	0.925	0.813	2.96894e-85	5
Fosb	4.96838e-84	0.259282	0.6	0.374	1.61239e-79	5
Cdkl5	9.60087e-126	0.259205	0.315	0.123	3.11577e-121	5
Dbn1	3.48359e-103	0.258379	0.943	0.799	1.13053e-98	5
Ago2	5.85203e-73	0.258373	0.76	0.62	1.89916e-68	5
Sox1	1.00635e-76	0.258266	0.647	0.452	3.26592e-72	5
Hnrnpa0	1.33674e-94	0.25819	0.925	0.895	4.33811e-90	5
Kcnk9	5.74015e-247	0.257916	0.223	0.031	1.86285e-242	5
Jund	1.10921e-98	0.256532	0.986	0.975	3.59972e-94	5
Ptprn	1.18012e-75	0.256195	0.716	0.523	3.82985e-71	5
Retreg2	3.1827e-75	0.255933	0.613	0.391	1.03288e-70	5
Vdac3	2.12575e-100	0.255782	0.947	0.919	6.89871e-96	5
Zfr	1.86984e-82	0.255452	0.857	0.752	6.06819e-78	5
Dlg4	1.37657e-85	0.254495	0.799	0.632	4.46739e-81	5
Cacnb2	1.72411e-123	0.254142	0.437	0.218	5.59526e-119	5
Fam171a2	2.62033e-83	0.252963	0.841	0.666	8.50377e-79	5
Tcaf1	2.87332e-88	0.252708	0.873	0.729	9.32479e-84	5
Tecr	7.45951e-101	0.252437	0.979	0.965	2.42083e-96	5
Tmem191c	2.24349e-87	0.252186	0.594	0.375	7.28081e-83	5
Qpct	1.70508e-92	0.251784	0.518	0.321	5.5335e-88	5
Itm2c	5.82005e-86	0.251518	0.924	0.865	1.88878e-81	5
Kirrel3	7.31619e-167	0.25121	0.366	0.126	2.37432e-162	5
Unc80	1.06574e-97	0.251046	0.585	0.35	3.45864e-93	5
Lor	7.64633e-130	0.25097	0.426	0.205	2.48146e-125	5
Aatk	8.5717e-93	0.250802	0.56	0.356	2.78177e-88	5
Arl4a	2.89257e-82	0.250578	0.834	0.667	9.38725e-78	5
Luc7l3	1.09118e-95	0.25023	0.925	0.846	3.54121e-91	5
Ctnna2	1.58647e-74	0.250021	0.664	0.502	5.14856e-70	5

## Sheet: Cluster 6
Figure 1-source data 2. Feature genes that define each of the 11 Pomc clusters
integrated across all six developmental stages.
The data are sorted from highest to lowest for each integrated custer by average log fold-change > 0.25
(avg_logFC) of gene expression in the featured cluster relative to all other clusters
pct.1, Percentage of cells in the indicated cluster with significant differential gene expression
pct.2, Percentage of cells in all other clusters with significant differential gene expression
p-val, p-value
p_val_adj, adjusted p-value for multiple comparisons
The Wilcoxon test was performed to identify the differentially expressed genes in each cluster
Gene	p_val	avg_logFC	pct.1	pct.2	p_val_adj	cluster
Dlx5	0	1.12464	0.801	0.007	0	6
Cited1	6.17798e-116	1.08215	0.874	0.47	2.00494e-111	6
Slc32a1	0	0.953485	0.794	0.083	0	6
Gad1	1.92966e-220	0.899665	0.821	0.243	6.26233e-216	6
Dlx2	0	0.886348	0.625	0.008	0	6
Ecel1	2.27707e-132	0.836106	0.697	0.248	7.38978e-128	6
Nrxn3	1.78391e-131	0.798727	0.915	0.467	5.78933e-127	6
Dlk1	6.81233e-61	0.764868	0.855	0.521	2.21081e-56	6
Csrp2	2.7037e-89	0.756694	0.826	0.535	8.77431e-85	6
Calb2	2.08385e-49	0.721112	0.712	0.46	6.76272e-45	6
Nrsn1	8.35296e-70	0.70099	0.787	0.534	2.71079e-65	6
Vsnl1	6.98125e-37	0.691998	0.588	0.381	2.26563e-32	6
Dlx1	0	0.680449	0.404	0.009	0	6
Pnoc	6.62442e-149	0.654011	0.608	0.165	2.14982e-144	6
Zfos1	6.93466e-08	0.627459	0.458	0.413	0.00225051	6
Pou2f2	1.31231e-75	0.622234	0.942	0.797	4.25884e-71	6
Dlx6	0	0.62154	0.528	0.005	0	6
Hmx2	0	0.620164	0.475	0.005	0	6
Chd3os	5.31648e-96	0.611545	0.944	0.711	1.72536e-91	6
Pik3r1	2.3604e-52	0.61114	0.794	0.661	7.66019e-48	6
Asb4	2.58216e-90	0.610154	0.852	0.443	8.37989e-86	6
Kcnip1	4.31753e-100	0.597689	0.775	0.387	1.40117e-95	6
Cox6a2	3.13223e-77	0.57947	0.453	0.149	1.0165e-72	6
Jpt1	7.22245e-12	0.540753	0.513	0.49	2.3439e-07	6
A2ml1	3.72758e-98	0.51478	0.458	0.121	1.20971e-93	6
Alcam	1.27587e-29	0.513559	0.62	0.448	4.14058e-25	6
Sox4	3.55199e-47	0.507212	0.99	0.868	1.15273e-42	6
6330403K07Rik	2.03443e-68	0.476197	0.998	0.905	6.60234e-64	6
Stmn4	2.5198e-57	0.47302	0.983	0.791	8.17751e-53	6
Ndn	6.17918e-15	0.46691	0.821	0.777	2.00533e-10	6
Atp2b1	2.99235e-19	0.463904	0.777	0.786	9.71108e-15	6
Zdbf2	4.53907e-44	0.452917	0.91	0.676	1.47307e-39	6
Tbx3	3.87785e-56	0.450777	0.862	0.495	1.25848e-51	6
Podxl2	2.35405e-54	0.444783	0.976	0.846	7.6396e-50	6
Rgs4	3.6622e-44	0.430626	0.76	0.46	1.18849e-39	6
Gad2	1.53841e-59	0.423274	0.462	0.17	4.99261e-55	6
Bub3	4.13495e-44	0.416634	0.877	0.738	1.34191e-39	6
Syt1	1.54869e-46	0.416231	0.843	0.561	5.02595e-42	6
C1qtnf4	2.58291e-42	0.408934	0.893	0.688	8.38233e-38	6
Khdrbs3	1.95882e-30	0.405491	0.758	0.589	6.35695e-26	6
Zcchc12	6.3142e-39	0.399341	0.935	0.722	2.04915e-34	6
Sh3gl3	1.87172e-48	0.39393	0.717	0.481	6.07428e-44	6
Tspan7	6.8709e-44	0.393348	0.867	0.723	2.22981e-39	6
Wbp5	3.51702e-06	0.392896	0.479	0.456	0.114138	6
Dlx6os1	0	0.39137	0.199	0.003	0	6
Peg10	3.25524e-44	0.388512	0.877	0.601	1.05642e-39	6
Nrp2	1.13089e-44	0.384307	0.702	0.449	3.67007e-40	6
Cd24a	2.59372e-26	0.375822	0.833	0.526	8.41741e-22	6
Efna5	7.33751e-45	0.37185	0.867	0.624	2.38124e-40	6
Hap1	4.31216e-39	0.370534	0.971	0.799	1.39943e-34	6
Smarcd3	1.41155e-47	0.370528	0.906	0.693	4.5809e-43	6
Aard	9.3976e-59	0.369153	0.441	0.17	3.0498e-54	6
H2afy2	4.35241e-40	0.363657	0.954	0.772	1.41249e-35	6
Tmem35a	2.5021e-41	0.362398	0.436	0.188	8.12005e-37	6
Ralyl	7.26163e-41	0.359353	0.77	0.527	2.35662e-36	6
Scg5	5.63665e-40	0.357194	0.942	0.759	1.82926e-35	6
Flywch2	8.51199e-43	0.354637	0.775	0.536	2.7624e-38	6
Snrpg	1.01972e-17	0.352878	0.969	0.927	3.3093e-13	6
Syt5	2.22017e-34	0.345819	0.755	0.546	7.20511e-30	6
Cirbp	4.48572e-50	0.341676	0.993	0.942	1.45575e-45	6
Tsc22d1	1.58887e-44	0.341419	0.998	0.888	5.15636e-40	6
Adgrl2	5.92319e-29	0.341261	0.567	0.387	1.92225e-24	6
Dbn1	4.14356e-35	0.3412	0.973	0.812	1.34471e-30	6
Tmsb10	2.20973e-35	0.340699	1	0.989	7.17122e-31	6
Pou6f2	8.7961e-44	0.339321	0.416	0.168	2.8546e-39	6
Scg2	4.15878e-34	0.334636	0.828	0.593	1.34965e-29	6
Sesn3	4.46421e-34	0.334371	0.722	0.501	1.44877e-29	6
Gm1673	3.25025e-44	0.333973	1	0.925	1.0548e-39	6
Basp1	5.17531e-24	0.333062	0.995	0.99	1.67954e-19	6
Cib2	8.34648e-32	0.329065	0.755	0.59	2.70868e-27	6
Irf2bpl	3.47262e-33	0.328151	0.886	0.736	1.12697e-28	6
Hs6st2	1.07781e-18	0.324703	0.586	0.426	3.49781e-14	6
Fnbp1l	3.30942e-35	0.321511	0.935	0.788	1.07401e-30	6
Cd200	4.29943e-28	0.318381	0.901	0.745	1.39529e-23	6
Grin2b	5.42244e-30	0.318288	0.668	0.442	1.75974e-25	6
Celf4	4.67228e-32	0.315015	0.983	0.831	1.51629e-27	6
Zfhx3	5.1921e-31	0.312629	0.918	0.796	1.68499e-26	6
Klf5	2.22318e-54	0.31159	0.453	0.179	7.21488e-50	6
Fxyd6	3.33982e-30	0.311227	0.99	0.88	1.08387e-25	6
Nrxn1	9.70572e-22	0.31088	0.831	0.747	3.1498e-17	6
Sh3gl2	8.38466e-21	0.309816	0.564	0.405	2.72107e-16	6
mt-Nd4l	2.34536e-15	0.309649	0.893	0.859	7.6114e-11	6
Mad2l2	6.35959e-28	0.306304	0.714	0.494	2.06388e-23	6
Adgrb3	1.61097e-36	0.304579	0.719	0.49	5.22807e-32	6
Snap47	1.35059e-27	0.301989	0.908	0.795	4.38306e-23	6
Gnaz	1.44357e-33	0.300884	0.884	0.675	4.68481e-29	6
H2afz	6.1478e-64	0.300432	0.995	0.987	1.99515e-59	6
Pcdh10	1.26683e-24	0.298408	0.654	0.488	4.11124e-20	6
Camta1	1.50935e-30	0.297815	0.937	0.818	4.8983e-26	6
Nrep	3.13218e-22	0.297754	0.809	0.576	1.01649e-17	6
Nsg1	7.81656e-32	0.297695	0.995	0.869	2.53671e-27	6
Brinp2	7.13223e-34	0.296018	0.508	0.278	2.31462e-29	6
1500035N22Rik	3.62801e-28	0.294974	0.431	0.232	1.1774e-23	6
Pkia	4.85768e-32	0.294876	0.855	0.675	1.57646e-27	6
Eid1	4.28896e-28	0.293723	0.981	0.911	1.39189e-23	6
Tekt1	5.07675e-95	0.292707	0.315	0.061	1.64756e-90	6
A730017C20Rik	1.06598e-26	0.292291	0.877	0.697	3.45941e-22	6
Ahi1	3.83189e-26	0.288745	0.952	0.814	1.24356e-21	6
Zfhx4	6.65306e-32	0.287933	0.678	0.443	2.15912e-27	6
Stmn1	5.41703e-32	0.286998	1	0.983	1.75799e-27	6
Chchd6	7.1757e-30	0.286958	0.816	0.669	2.32873e-25	6
Uchl1	5.25739e-26	0.286419	0.99	0.913	1.70618e-21	6
Frat2	4.69406e-24	0.286344	0.596	0.405	1.52336e-19	6
Pdyn	1.6402e-45	0.286288	0.499	0.232	5.32296e-41	6
Marcksl1	5.17197e-26	0.282258	1	0.963	1.67846e-21	6
Ctnnd2	8.64813e-24	0.281911	0.712	0.57	2.80658e-19	6
Cxadr	3.40681e-30	0.281525	0.806	0.61	1.10561e-25	6
Aes	7.80283e-25	0.281366	0.966	0.931	2.53225e-20	6
Dpp6	2.62221e-19	0.281019	0.7	0.559	8.50984e-15	6
Dnajb6	7.22104e-37	0.27998	0.985	0.936	2.34344e-32	6
1110004F10Rik	1.97398e-36	0.277058	0.978	0.918	6.40616e-32	6
Map9	6.12367e-29	0.276649	0.789	0.59	1.98731e-24	6
Ssbp3	4.93003e-28	0.276643	0.903	0.8	1.59994e-23	6
Nr5a2	2.50182e-53	0.275582	0.46	0.174	8.11916e-49	6
Atxn7l3b	6.51795e-37	0.271931	0.995	0.939	2.11527e-32	6
Id4	5.52732e-09	0.268302	0.404	0.304	0.000179378	6
Hmx3	0	0.267666	0.303	0.003	0	6
Pnck	7.72631e-28	0.267405	0.794	0.581	2.50742e-23	6
H3f3a	6.17287e-36	0.267364	1	0.995	2.00328e-31	6
Rab11b	6.59464e-33	0.266288	0.981	0.915	2.14016e-28	6
Ank3	6.18487e-26	0.264604	0.932	0.76	2.00717e-21	6
Ccl27a	1.13866e-28	0.263865	0.91	0.727	3.69529e-24	6
Pcdh19	5.38913e-23	0.263509	0.654	0.454	1.74893e-18	6
Gm9843	0.00172993	0.262806	0.426	0.395	1	6
Ndufa5	2.50777e-26	0.262432	0.952	0.895	8.13846e-22	6
Nhs	3.63803e-32	0.262266	0.438	0.231	1.18065e-27	6
Slitrk4	7.47573e-44	0.260717	0.38	0.151	2.4261e-39	6
H3f3b	3.44474e-34	0.260141	1	0.997	1.11792e-29	6
Nme1	6.25152e-32	0.260003	0.998	0.951	2.02881e-27	6
Dtd1	5.36593e-24	0.259582	0.818	0.65	1.74141e-19	6
Zcchc18	3.57541e-22	0.2593	0.91	0.755	1.16033e-17	6
Rbm4b	1.89965e-20	0.259134	0.915	0.787	6.16494e-16	6
Slc24a5	5.62422e-23	0.258431	0.857	0.693	1.82523e-18	6
Casp3	7.89503e-14	0.258196	0.487	0.366	2.56217e-09	6
Psd	4.07996e-19	0.258071	0.797	0.64	1.32407e-14	6
Serf1	2.00128e-27	0.256961	0.983	0.834	6.49476e-23	6
Nrsn2	2.60624e-27	0.256813	0.823	0.599	8.45803e-23	6
Ybx3	1.51777e-16	0.256078	0.63	0.514	4.92562e-12	6
BC048546	2.43214e-93	0.256018	0.131	0.011	7.89303e-89	6
Magel2	9.14878e-14	0.255844	0.697	0.547	2.96905e-09	6
Apc2	1.45842e-23	0.255316	0.758	0.589	4.733e-19	6
Plcb4	8.62336e-19	0.254727	0.462	0.306	2.79854e-14	6
Hmgb1	2.31258e-41	0.254568	1	0.982	7.50501e-37	6
Uchl3	4.7269e-24	0.254255	0.884	0.787	1.53402e-19	6
Hmgb3	8.66613e-24	0.254254	0.995	0.832	2.81242e-19	6
Pnmal2	3.96177e-21	0.253668	0.884	0.705	1.28571e-16	6
Rps6ka6	9.07423e-31	0.253361	0.487	0.273	2.94486e-26	6
Spock1	3.90155e-19	0.253302	0.489	0.326	1.26617e-14	6
Efnb3	3.57794e-23	0.253155	0.886	0.71	1.16115e-18	6
Chl1	3.20441e-24	0.252816	0.705	0.471	1.03993e-19	6
Pbx1	1.75288e-31	0.251289	0.935	0.788	5.68864e-27	6
Bex4	1.66073e-21	0.251018	0.925	0.774	5.38957e-17	6
Csrnp3	5.74612e-21	0.250947	0.76	0.601	1.86479e-16	6
Nudt11	9.14309e-21	0.250789	0.811	0.637	2.96721e-16	6

## Sheet: Cluster 7
Figure 1-source data 2. Feature genes that define each of the 11 Pomc clusters
integrated across all six developmental stages.
The data are sorted from highest to lowest for each integrated custer by average log fold-change > 0.25
(avg_logFC) of gene expression in the featured cluster relative to all other clusters
pct.1, Percentage of cells in the indicated cluster with significant differential gene expression
pct.2, Percentage of cells in all other clusters with significant differential gene expression
p-val, p-value
p_val_adj, adjusted p-value for multiple comparisons
The Wilcoxon test was performed to identify the differentially expressed genes in each cluster
Gene	p_val	avg_logFC	pct.1	pct.2	p_val_adj	cluster
Chchd10	2.18001e-65	1.43325	1	0.615	7.07477e-61	7
S100a10	2.23839e-50	1.3213	0.964	0.513	7.26424e-46	7
Rbp1	1.46744e-67	1.28562	0.928	0.299	4.76228e-63	7
Nnat	6.83094e-51	1.24972	1	0.957	2.21684e-46	7
Sox14	8.2387e-80	1.23533	0.964	0.265	2.67371e-75	7
Gm2694	3.43351e-66	1.17114	0.919	0.296	1.11428e-61	7
Bcl11b	9.67321e-164	1.16577	0.955	0.128	3.13925e-159	7
Islr2	3.43339e-64	1.16441	0.964	0.326	1.11424e-59	7
Nell2	9.55157e-63	1.11534	0.991	0.546	3.09977e-58	7
Cbln1	1.8329e-73	0.985018	0.847	0.22	5.94832e-69	7
Sepw1	3.12833e-41	0.953576	0.901	0.462	1.01524e-36	7
Six3	4.11868e-52	0.926052	0.991	0.504	1.33663e-47	7
Syt4	1.2648e-34	0.924203	0.982	0.703	4.10464e-30	7
Hn1	1.70553e-37	0.881169	0.901	0.462	5.53496e-33	7
Cnr1	1.10129e-67	0.875949	0.946	0.32	3.57403e-63	7
Akap7	7.36235e-60	0.865577	0.928	0.367	2.3893e-55	7
Sox2	3.98509e-48	0.820694	0.982	0.448	1.29328e-43	7
Nkx2-1	2.15332e-27	0.817073	0.946	0.598	6.98818e-23	7
Serpine2	3.86364e-31	0.760503	0.883	0.442	1.25387e-26	7
Tppp3	3.93828e-24	0.747804	0.919	0.629	1.27809e-19	7
Fam19a2	4.53573e-58	0.732755	0.766	0.209	1.47198e-53	7
Tubb2b	6.37625e-34	0.727975	1	0.966	2.06929e-29	7
Mgst3	1.14765e-34	0.72606	0.973	0.718	3.72447e-30	7
Tuba1a	1.03552e-25	0.724481	1	0.993	3.36058e-21	7
Cacna2d1	1.55484e-33	0.7242	0.973	0.577	5.04591e-29	7
Cd24a	5.72428e-24	0.723869	0.928	0.531	1.8577e-19	7
Foxp2	1.29413e-76	0.719431	0.784	0.159	4.19985e-72	7
Adcyap1	8.86539e-74	0.70179	0.613	0.103	2.87709e-69	7
Tcf7l2	1.54817e-43	0.699119	0.946	0.401	5.02429e-39	7
Hmgb3	7.86346e-32	0.697856	1	0.835	2.55193e-27	7
Bcl11a	6.71458e-41	0.694288	0.91	0.386	2.17908e-36	7
Sox11	2.7865e-24	0.692255	0.982	0.743	9.04304e-20	7
Mif	7.9894e-43	0.685562	1	0.945	2.5928e-38	7
Lmo4	8.44965e-36	0.682779	0.82	0.348	2.74216e-31	7
Tceb2	5.28157e-26	0.682383	0.901	0.462	1.71403e-21	7
Fam19a1	2.89399e-107	0.672193	0.703	0.098	9.39186e-103	7
Rac3	3.85385e-32	0.669188	0.982	0.821	1.25069e-27	7
Dpysl3	2.82837e-31	0.666838	1	0.797	9.17891e-27	7
Chd3	9.46038e-36	0.666698	0.964	0.659	3.07018e-31	7
Prdm13	0	0.656638	0.685	0.027	0	7
Brinp3	4.64353e-40	0.628212	0.766	0.272	1.50696e-35	7
Plp1	2.67317e-43	0.624323	0.712	0.234	8.67525e-39	7
Cntnap2	7.62814e-35	0.618987	0.892	0.475	2.47556e-30	7
Hs3st5	8.65155e-56	0.61644	0.712	0.194	2.80769e-51	7
Tubb5	6.962e-29	0.615219	1	0.992	2.25938e-24	7
Myeov2	1.82484e-26	0.611986	0.892	0.449	5.92216e-22	7
Tmsb10	1.15561e-35	0.610774	1	0.989	3.75031e-31	7
Zfp428	1.22961e-34	0.606984	0.982	0.806	3.99045e-30	7
Stmn1	3.15152e-33	0.605342	1	0.984	1.02276e-28	7
Robo2	2.49865e-44	0.585696	0.901	0.349	8.10888e-40	7
Cox6a1	3.32672e-29	0.582669	1	0.936	1.07962e-24	7
Tubb3	1.05004e-23	0.58079	1	0.914	3.40769e-19	7
Arf6	8.40216e-27	0.57241	0.874	0.515	2.72675e-22	7
Atp5o	2.03091e-21	0.55621	0.874	0.441	6.5909e-17	7
Crip2	8.16414e-27	0.553789	0.991	0.769	2.64951e-22	7
Nrep	2.4545e-27	0.548399	0.964	0.58	7.9656e-23	7
Serf1	1.11767e-24	0.548061	0.991	0.837	3.62718e-20	7
Pafah1b3	8.18752e-26	0.54445	1	0.874	2.6571e-21	7
Aes	2.29777e-31	0.538584	1	0.932	7.45694e-27	7
Cxx1a	2.8729e-22	0.536889	0.883	0.44	9.32344e-18	7
Tonsl	2.53624e-24	0.536663	0.883	0.462	8.23086e-20	7
Ngfrap1	3.6012e-17	0.536466	0.901	0.461	1.1687e-12	7
Mapt	3.6905e-27	0.534975	1	0.841	1.19768e-22	7
Prdm12	8.98381e-29	0.529934	0.703	0.267	2.91552e-24	7
Selk	6.18524e-18	0.514352	0.901	0.457	2.0073e-13	7
Thra	1.34413e-27	0.513997	1	0.868	4.36209e-23	7
Prdx2	2.01935e-26	0.509732	1	0.973	6.55339e-22	7
Fam131c	5.21338e-29	0.507708	0.712	0.3	1.6919e-24	7
Sox3	9.02507e-21	0.504579	0.667	0.31	2.9289e-16	7
Wbp5	4.01449e-19	0.48878	0.892	0.453	1.30282e-14	7
Rtn1	1.11479e-26	0.487723	1	0.948	3.61783e-22	7
Fam57b	1.86867e-25	0.485723	0.982	0.636	6.0644e-21	7
Pea15a	4.45757e-22	0.482575	0.991	0.84	1.44662e-17	7
Sept6	5.58451e-24	0.477562	0.874	0.468	1.81234e-19	7
Actg1	1.66755e-26	0.477205	1	0.999	5.4117e-22	7
1110001J03Rik	8.38085e-26	0.476053	0.829	0.354	2.71984e-21	7
Stmn3	5.81196e-26	0.474426	1	0.907	1.88616e-21	7
Sep15	3.46159e-19	0.457424	0.874	0.436	1.12339e-14	7
Shtn1	3.87688e-22	0.454054	0.811	0.44	1.25817e-17	7
Nhp2l1	2.91126e-18	0.452534	0.865	0.433	9.4479e-14	7
Erh	2.7856e-18	0.452502	1	0.92	9.04009e-14	7
Sbk1	1.03523e-19	0.450547	0.964	0.666	3.35963e-15	7
Mllt11	3.06515e-23	0.449759	1	0.878	9.94733e-19	7
Tceb1	4.72481e-20	0.449504	0.892	0.431	1.53334e-15	7
Cdk5r1	6.97574e-23	0.44914	0.982	0.775	2.26384e-18	7
Ina	2.2371e-20	0.444939	1	0.772	7.26006e-16	7
Klf7	1.70825e-18	0.442461	0.973	0.809	5.54379e-14	7
Idh1	1.67576e-15	0.441479	0.955	0.779	5.43834e-11	7
Pbx1	7.00258e-18	0.439131	0.973	0.79	2.27255e-13	7
Gm27199	3.12829e-43	0.434751	0.694	0.173	1.01522e-38	7
Eif4a1	7.48064e-19	0.433634	1	0.988	2.42769e-14	7
Crmp1	5.89795e-18	0.432386	0.991	0.81	1.91406e-13	7
Ncan	1.12022e-18	0.431737	0.928	0.679	3.63545e-14	7
Gnb2l1	4.38464e-13	0.430495	0.901	0.458	1.42295e-08	7
Nr5a1	8.87649e-66	0.426642	0.676	0.122	2.88069e-61	7
BC029214	5.10168e-30	0.426197	0.73	0.257	1.65565e-25	7
Shfm1	5.67215e-16	0.426111	0.901	0.452	1.84078e-11	7
Reep5	4.20483e-25	0.422192	0.991	0.925	1.36459e-20	7
Fam177a	4.25709e-21	0.421226	0.685	0.319	1.38155e-16	7
Carhsp1	1.08518e-18	0.418758	0.883	0.535	3.52173e-14	7
Reep1	2.71426e-21	0.418477	0.991	0.719	8.80858e-17	7
Nsg1	1.97143e-19	0.417264	1	0.871	6.39787e-15	7
Mmd	1.48038e-19	0.407897	0.928	0.595	4.80426e-15	7
Elavl3	1.19529e-17	0.40789	1	0.812	3.87907e-13	7
Ncs1	3.35381e-17	0.407643	0.937	0.658	1.08841e-12	7
Slmo2	1.98816e-22	0.407188	0.748	0.311	6.45218e-18	7
Dpysl4	6.1187e-17	0.406383	0.901	0.601	1.9857e-12	7
Cxx1b	7.35319e-20	0.406355	0.847	0.406	2.38633e-15	7
Evl	4.64912e-21	0.406196	1	0.932	1.50878e-16	7
2310036O22Rik	1.94952e-17	0.404638	0.892	0.438	6.32676e-13	7
Calm3	1.03334e-24	0.404332	1	0.973	3.35351e-20	7
Parp6	4.67764e-19	0.404219	0.946	0.684	1.51803e-14	7
Atpif1	5.6085e-31	0.404093	1	0.987	1.82013e-26	7
Marcksl1	5.25796e-17	0.403827	1	0.964	1.70637e-12	7
Atat1	7.62385e-18	0.403355	0.946	0.699	2.47417e-13	7
Uchl1	3.3026e-16	0.402946	1	0.915	1.07179e-11	7
Stmn2	1.26118e-17	0.401387	1	0.909	4.09292e-13	7
Gap43	1.14544e-15	0.401275	1	0.915	3.71729e-11	7
Pcbp4	1.63721e-15	0.399768	1	0.798	5.31325e-11	7
Blcap	4.3549e-16	0.398214	0.946	0.797	1.4133e-11	7
Gng2	1.08419e-19	0.397809	0.991	0.882	3.51853e-15	7
Dynlrb1	4.8764e-24	0.392985	1	0.942	1.58254e-19	7
Celf2	1.28128e-20	0.390736	0.982	0.873	4.15812e-16	7
Rpl31	5.58257e-15	0.390206	1	0.975	1.81171e-10	7
2700060E02Rik	1.13225e-14	0.38987	0.901	0.446	3.67449e-10	7
Eef1g	5.41627e-16	0.385811	1	0.972	1.75774e-11	7
2810428I15Rik	1.66252e-19	0.384317	0.811	0.376	5.39536e-15	7
Smarcb1	3.47578e-15	0.383926	0.946	0.785	1.12799e-10	7
Ctxn1	1.06066e-16	0.382957	0.991	0.793	3.44217e-12	7
Acot7	2.64598e-16	0.380966	0.955	0.76	8.587e-12	7
2700094K13Rik	1.16587e-16	0.380766	0.811	0.408	3.78359e-12	7
Nrgn	0.00285238	0.379831	0.126	0.275	1	7
Rpl13a	6.02296e-08	0.379276	1	0.822	0.00195463	7
Gstm7	7.3896e-18	0.377442	0.775	0.435	2.39815e-13	7
Ppdpf	1.02526e-14	0.377319	0.982	0.843	3.32729e-10	7
Rpl23a	5.32443e-13	0.375938	1	0.952	1.72794e-08	7
Tox3	3.89855e-12	0.375537	0.793	0.522	1.2652e-07	7
Enc1	8.27868e-20	0.374584	0.82	0.472	2.68668e-15	7
Gm9843	1.41806e-17	0.372117	0.829	0.392	4.60202e-13	7
2010107G23Rik	9.75378e-24	0.372021	0.667	0.252	3.16539e-19	7
Camkv	3.16925e-14	0.37162	0.649	0.374	1.02852e-09	7
Anapc5	2.40906e-18	0.370769	1	0.892	7.81812e-14	7
Gm10073	7.34652e-16	0.369685	0.739	0.402	2.38417e-11	7
Actl6b	3.62971e-18	0.369621	0.964	0.688	1.17795e-13	7
Mapk3	1.38505e-16	0.367532	0.937	0.77	4.49492e-12	7
Cgref1	2.2046e-19	0.366629	0.883	0.489	7.15458e-15	7
Nptx2	1.03583e-16	0.365442	0.676	0.325	3.36158e-12	7
Fam134a	6.66084e-16	0.365178	0.694	0.337	2.16164e-11	7
Ap1s1	1.45416e-15	0.364563	0.964	0.808	4.71919e-11	7
Klhl13	1.31209e-14	0.364029	0.649	0.371	4.25813e-10	7
Stmn4	3.88068e-12	0.363734	1	0.795	1.2594e-07	7
Mycn	5.78382e-26	0.360485	0.658	0.243	1.87702e-21	7
Mtch2	1.50899e-15	0.358342	0.955	0.783	4.89712e-11	7
Stx7	9.66223e-16	0.356644	0.982	0.878	3.13568e-11	7
Hdgfrp3	8.72011e-19	0.356565	0.874	0.41	2.82994e-14	7
Prmt8	1.35548e-27	0.356302	0.685	0.254	4.39895e-23	7
Cacnb3	2.32094e-16	0.355264	0.928	0.639	7.53214e-12	7
Rpl10-ps3	1.22538e-16	0.355152	0.838	0.523	3.97671e-12	7
Gm9844	1.51646e-14	0.354261	0.622	0.299	4.92137e-10	7
Wdr89	2.2949e-14	0.35324	0.865	0.628	7.44764e-10	7
Pebp1	9.79862e-23	0.352535	1	0.983	3.17995e-18	7
Samd14	1.96465e-16	0.352366	0.973	0.712	6.37587e-12	7
Mrps6	3.34676e-15	0.352356	0.901	0.647	1.08612e-10	7
Ppp1r1a	3.76821e-13	0.350562	0.955	0.7	1.2229e-08	7
Dstn	8.69286e-17	0.350329	1	0.922	2.82109e-12	7
Prmt1	4.32875e-13	0.34653	1	0.9	1.40481e-08	7
Crtac1	3.08924e-19	0.345848	0.604	0.266	1.00255e-14	7
Dab1	9.1844e-15	0.344282	0.595	0.307	2.98061e-10	7
Bdnf	1.39109e-06	0.342255	0.27	0.129	0.045145	7
Klf6	7.1774e-13	0.341795	0.874	0.673	2.32928e-08	7
Ooep	9.7885e-23	0.340983	0.477	0.157	3.17666e-18	7
Ctnnbip1	9.43815e-15	0.33892	0.964	0.785	3.06296e-10	7
Tbcb	6.44031e-16	0.33809	0.991	0.895	2.09007e-11	7
Map1b	4.01611e-15	0.338027	1	0.902	1.30335e-10	7
Dlgap4	3.69329e-13	0.337529	0.964	0.828	1.19858e-08	7
Nipsnap3b	1.49333e-16	0.33305	0.973	0.751	4.84632e-12	7
Ap2m1	7.29797e-17	0.332882	1	0.954	2.36841e-12	7
Ppp2r2c	3.00168e-12	0.332086	0.784	0.501	9.74134e-08	7
Dpysl2	6.45228e-11	0.331854	1	0.968	2.09396e-06	7
Rpl10	2.83755e-14	0.331478	1	0.991	9.20869e-10	7
Anp32a	1.16949e-13	0.330452	0.946	0.825	3.79533e-09	7
Ap2s1	2.09235e-16	0.329944	0.991	0.931	6.7903e-12	7
Fam134b	1.01118e-29	0.328661	0.541	0.154	3.28159e-25	7
Rps17	1.5387e-12	0.327488	1	0.976	4.99355e-08	7
Gdi1	8.13347e-13	0.326129	1	0.863	2.63956e-08	7
Slit2	2.20754e-16	0.326092	0.541	0.243	7.16414e-12	7
Fam195b	3.29049e-14	0.325775	0.82	0.41	1.06786e-09	7
Tmem163	1.42216e-13	0.325153	0.694	0.368	4.61532e-09	7
mt-Nd1	1.02209e-18	0.321749	1	0.999	3.31699e-14	7
Ptpn5	1.1701e-13	0.321149	0.82	0.549	3.79732e-09	7
Mrps11	7.05019e-07	0.317049	0.811	0.661	0.02288	7
Ict1	6.67445e-16	0.316998	0.739	0.345	2.16606e-11	7
Rbfox1	7.01693e-15	0.315309	0.712	0.387	2.2772e-10	7
Ypel1	5.15644e-13	0.312579	0.748	0.454	1.67342e-08	7
Lhx5	9.61721e-29	0.312333	0.613	0.18	3.12107e-24	7
Nme1	1.20708e-13	0.311385	1	0.952	3.91733e-09	7
Fnbp1l	5.9038e-12	0.311063	0.973	0.791	1.91596e-07	7
Ccl27a	4.56097e-13	0.308228	0.991	0.731	1.48017e-08	7
1500011B03Rik	1.9545e-11	0.306414	0.937	0.739	6.34292e-07	7
Rab33a	1.20739e-15	0.306049	0.64	0.322	3.91834e-11	7
0610010F05Rik	1.52503e-14	0.305331	0.874	0.583	4.94919e-10	7
Hdac2	2.10507e-11	0.305254	0.982	0.837	6.83158e-07	7
Add2	9.66315e-15	0.304755	0.82	0.516	3.13598e-10	7
Apoa1bp	1.33211e-17	0.304278	0.721	0.316	4.32309e-13	7
Arpc5	2.05363e-15	0.303481	0.991	0.927	6.66464e-11	7
L1cam	6.18162e-12	0.303369	0.919	0.653	2.00612e-07	7
Ybx1	2.68029e-15	0.303092	1	0.988	8.69835e-11	7
Stx1a	1.29785e-10	0.301499	0.73	0.498	4.21193e-06	7
Bzw2	1.5725e-12	0.301424	0.937	0.753	5.10324e-08	7
Ddah2	8.30616e-11	0.301115	0.946	0.777	2.6956e-06	7
Ube2d1	1.31155e-13	0.300935	0.964	0.725	4.25636e-09	7
Rpl23a-ps3	9.79291e-12	0.299964	0.721	0.381	3.17809e-07	7
Svbp	6.40681e-12	0.299141	0.955	0.78	2.0792e-07	7
Stra13	1.70423e-15	0.298403	0.649	0.288	5.53073e-11	7
Ppp1r14b	1.08767e-08	0.297951	0.982	0.88	0.000352983	7
N6amt2	6.35247e-21	0.297912	0.595	0.218	2.06157e-16	7
Eif4g2	7.02865e-14	0.297909	1	0.982	2.28101e-09	7
Fam155a	7.95428e-09	0.297748	0.721	0.529	0.00025814	7
Klhl5	1.36595e-22	0.297094	0.568	0.212	4.43291e-18	7
Xpr1	1.79138e-12	0.296789	0.937	0.757	5.81355e-08	7
Ppp2r4	1.6096e-18	0.295089	0.649	0.27	5.22364e-14	7
Mpped2	1.21666e-10	0.294949	0.973	0.706	3.94842e-06	7
Fabp5	5.94374e-12	0.293816	1	0.931	1.92892e-07	7
Cadm3	1.00251e-12	0.293124	0.838	0.556	3.25344e-08	7
Rnf182	3.12208e-23	0.292082	0.541	0.187	1.01321e-18	7
S100a11	5.29345e-20	0.290691	0.55	0.208	1.71788e-15	7
Gm8773	1.38108e-28	0.290419	0.532	0.16	4.48203e-24	7
Gm8730	7.79451e-11	0.287826	0.685	0.361	2.52955e-06	7
Srp54b	1.4592e-12	0.287483	0.685	0.342	4.73554e-08	7
Cdh7	8.67395e-32	0.286932	0.432	0.105	2.81496e-27	7
Cotl1	3.7815e-10	0.286458	0.955	0.86	1.22721e-05	7
Fdx1l	1.14913e-19	0.286319	0.667	0.264	3.72927e-15	7
Med28	1.0466e-11	0.28534	0.955	0.819	3.39652e-07	7
B3glct	2.33984e-20	0.285095	0.523	0.195	7.59348e-16	7
Cox4i1	2.13799e-16	0.28464	1	0.993	6.93841e-12	7
Raly	3.45117e-12	0.284468	0.991	0.871	1.12001e-07	7
Ywhaq	8.25427e-12	0.284224	1	0.97	2.67876e-07	7
Rps15	2.42887e-09	0.283987	1	0.968	7.88241e-05	7
Wbscr17	2.7237e-29	0.283326	0.432	0.104	8.83923e-25	7
Mea1	3.77029e-13	0.283134	0.946	0.755	1.22357e-08	7
Id2	1.27974e-11	0.282346	0.613	0.336	4.15315e-07	7
Dusp26	5.88414e-10	0.281805	0.955	0.671	1.90958e-05	7
R3hdm4	1.76502e-11	0.280989	0.937	0.784	5.72801e-07	7
U2af1	2.10712e-10	0.278943	0.973	0.88	6.83823e-06	7
Atp5b	1.99794e-10	0.278425	1	0.979	6.4839e-06	7
Ric8	1.43864e-18	0.278241	0.577	0.224	4.66883e-14	7
Trappc4	7.40813e-09	0.277208	0.982	0.866	0.000240416	7
Tpgs2	1.00232e-09	0.27714	0.865	0.681	3.25283e-05	7
Arf5	2.59695e-16	0.275712	0.991	0.979	8.4279e-12	7
Rab3a	9.88945e-08	0.275253	1	0.845	0.00320942	7
Hn1l	1.63891e-16	0.274126	0.604	0.248	5.31876e-12	7
l7Rn6	3.37242e-12	0.273251	0.631	0.31	1.09445e-07	7
Gpr149	1.80396e-96	0.27287	0.45	0.042	5.8544e-92	7
Rap1gap	9.89653e-10	0.272138	0.658	0.432	3.21172e-05	7
Rpl6l	1.41742e-11	0.271945	0.64	0.314	4.59995e-07	7
Rnf165	1.40341e-12	0.271661	0.883	0.547	4.55448e-08	7
Fkbp5	4.30308e-16	0.271385	0.568	0.257	1.39648e-11	7
Lmnb1	5.40777e-13	0.271224	0.757	0.429	1.75498e-08	7
Lin7c	5.5034e-09	0.271127	0.91	0.748	0.000178602	7
Gm10116	1.56361e-13	0.27042	0.631	0.289	5.07439e-09	7
Six6	6.93792e-16	0.270215	0.892	0.426	2.25156e-11	7
Cd99l2	2.96142e-10	0.268947	0.739	0.501	9.6107e-06	7
Hist3h2ba	8.45025e-12	0.267873	0.991	0.758	2.74236e-07	7
Plppr3	1.28572e-11	0.267626	0.955	0.731	4.17255e-07	7
Mapre1	1.40763e-10	0.267374	0.982	0.922	4.56817e-06	7
Gdpd5	4.13464e-14	0.266621	0.568	0.275	1.34182e-09	7
Dynlt1c	1.52849e-14	0.266083	0.613	0.282	4.96041e-10	7
Ephb2	3.59373e-14	0.265884	0.73	0.413	1.16627e-09	7
Uba1	2.76705e-09	0.265644	0.937	0.777	8.9799e-05	7
Gm561	1.26144e-17	0.264742	0.649	0.264	4.09376e-13	7
Ppp2r1a	2.0232e-08	0.264046	0.946	0.831	0.000656589	7
Tmem65	4.82428e-09	0.264034	0.766	0.522	0.000156562	7
Ogt	8.01727e-06	0.263785	0.784	0.677	0.260185	7
Tmem120a	4.77801e-11	0.262798	0.604	0.34	1.55061e-06	7
Psmb7	8.00325e-11	0.262395	0.964	0.888	2.59729e-06	7
Txn1	7.14461e-13	0.260865	1	0.915	2.31864e-08	7
Nsg2	6.85909e-08	0.259894	0.964	0.819	0.00222598	7
Gda	0.00148497	0.259026	0.198	0.114	1	7
Morf4l2	3.77456e-10	0.258553	1	0.924	1.22496e-05	7
Btf3l4	5.03314e-10	0.258224	0.892	0.652	1.6334e-05	7
Rps25	6.9232e-12	0.257038	1	0.982	2.24678e-07	7
Ptms	5.81388e-12	0.256267	1	0.984	1.88678e-07	7
Banf1	1.54575e-09	0.255523	0.874	0.707	5.01641e-05	7
Vopp1	2.84032e-13	0.254476	0.811	0.482	9.2177e-09	7
Gm9493	7.0918e-12	0.253378	0.784	0.492	2.3015e-07	7
Sema6a	5.74404e-07	0.253253	0.739	0.563	0.0186411	7
Fez1	5.93448e-09	0.252411	0.982	0.826	0.000192592	7
1700037H04Rik	3.17705e-10	0.251532	0.757	0.498	1.03105e-05	7
Ehd1	3.18466e-06	0.251469	0.712	0.558	0.103352	7
Brwd1	4.10034e-11	0.25115	0.964	0.765	1.33068e-06	7
Cnih2	4.75515e-06	0.250182	0.991	0.828	0.154319	7
Snrpg	6.46597e-11	0.250048	0.973	0.928	2.0984e-06	7
Hdgfrp2	3.50507e-12	0.250046	0.541	0.249	1.1375e-07	7

## Sheet: Cluster 8
Figure 1-source data 2. Feature genes that define each of the 11 Pomc clusters
integrated across all six developmental stages.
The data are sorted from highest to lowest for each integrated custer by average log fold-change > 0.25
(avg_logFC) of gene expression in the featured cluster relative to all other clusters
pct.1, Percentage of cells in the indicated cluster with significant differential gene expression
pct.2, Percentage of cells in all other clusters with significant differential gene expression
p-val, p-value
p_val_adj, adjusted p-value for multiple comparisons
The Wilcoxon test was performed to identify the differentially expressed genes in each cluster
Gene	p_val	avg_logFC	pct.1	pct.2	p_val_adj	cluster
Pitx2	0	2.27964	0.873	0.057	0	8
Barhl1	0	2.00716	0.808	0.021	0	8
Foxa1	0	1.94478	0.897	0.048	0	8
Foxp2	0	1.3638	0.857	0.142	0	8
Cd24a	1.20605e-164	1.2447	0.944	0.522	3.91399e-160	8
C130021I20Rik	0	1.21198	0.852	0.046	0	8
Sox4	5.2672e-131	1.19038	0.991	0.868	1.70936e-126	8
Tac1	2.85349e-68	1.18557	0.441	0.16	9.26042e-64	8
Irx5	1.09583e-232	1.16048	0.509	0.076	3.5563e-228	8
C1ql1	0	1.14481	0.685	0.069	0	8
Bcl11a	1.48351e-173	1.12763	0.864	0.375	4.81443e-169	8
Lmx1a	0	1.08639	0.798	0.049	0	8
Pou3f4	0	1.07541	0.671	0.07	0	8
Hist3h2ba	1.21032e-112	1.06367	0.972	0.753	3.92786e-108	8
Nxph1	9.92051e-118	1.01958	0.575	0.199	3.2195e-113	8
Uncx	0	0.930488	0.704	0.061	0	8
Mir124-2hg	2.90724e-273	0.925046	0.77	0.154	9.43487e-269	8
Irx6	0	0.909794	0.399	0.027	0	8
Celf2	1.13817e-122	0.895813	0.981	0.87	3.6937e-118	8
Atat1	1.42464e-138	0.889909	0.962	0.693	4.62339e-134	8
Igfbpl1	4.50547e-78	0.872981	0.65	0.28	1.46216e-73	8
Foxp1	3.71897e-96	0.869743	0.8	0.504	1.20692e-91	8
Tuba1a	4.08111e-113	0.861587	1	0.993	1.32444e-108	8
Cck	2.84323e-280	0.843801	0.277	0.015	9.22713e-276	8
Irx3	5.20398e-176	0.797159	0.434	0.07	1.68885e-171	8
Hist3h2a	3.59899e-84	0.796456	0.805	0.463	1.16798e-79	8
Stmn1	1.73647e-162	0.796419	1	0.983	5.63536e-158	8
Pou3f1	7.46616e-114	0.792469	0.387	0.083	2.42299e-109	8
Dmrtb1	4.63582e-240	0.790604	0.631	0.111	1.50446e-235	8
Sox11	9.0108e-79	0.789414	0.962	0.738	2.92428e-74	8
Tubb2b	2.18771e-132	0.783843	1	0.965	7.09977e-128	8
Rmst	5.35249e-106	0.768165	0.822	0.468	1.73704e-101	8
Nrep	5.08075e-107	0.767909	0.93	0.572	1.64886e-102	8
Robo2	5.78247e-78	0.765284	0.681	0.344	1.87659e-73	8
Sbk1	1.85393e-87	0.751661	0.913	0.661	6.01655e-83	8
Zfhx4	2.48026e-86	0.743769	0.768	0.44	8.0492e-82	8
Cbln2	4.00833e-65	0.731472	0.519	0.205	1.30082e-60	8
Hn1	2.91323e-82	0.727456	0.854	0.453	9.45429e-78	8
Crnde	8.84461e-210	0.720038	0.385	0.046	2.87034e-205	8
Elavl2	1.66952e-108	0.716175	0.883	0.547	5.41809e-104	8
Tubb3	5.97164e-113	0.71312	1	0.912	1.93798e-108	8
Cacna2d1	4.8129e-90	0.710113	0.885	0.571	1.56193e-85	8
Rab3c	7.04862e-110	0.702915	0.871	0.555	2.28749e-105	8
Adcyap1	2.16067e-167	0.697311	0.488	0.095	7.01202e-163	8
Zfhx3	3.42079e-60	0.695602	0.911	0.796	1.11015e-55	8
Ddah1	3.00641e-42	0.690444	0.66	0.462	9.7567e-38	8
Nnat	2.41728e-95	0.686737	1	0.956	7.84481e-91	8
Chgb	1.89835e-16	0.667467	0.744	0.676	6.16071e-12	8
Nr4a2	9.76872e-63	0.649179	0.528	0.215	3.17024e-58	8
Hdgfrp3	5.94841e-86	0.638461	0.8	0.401	1.93044e-81	8
Svbp	2.06226e-84	0.630953	0.941	0.776	6.69266e-80	8
H2afy2	1.04308e-90	0.618232	0.974	0.772	3.38509e-86	8
Lsamp	3.46281e-72	0.61656	0.897	0.646	1.12379e-67	8
Fam57b	3.60293e-88	0.616018	0.93	0.63	1.16926e-83	8
Dpysl3	6.58088e-86	0.609652	0.991	0.792	2.13569e-81	8
Cyth2	5.78196e-76	0.609595	0.939	0.781	1.87642e-71	8
Tspan13	6.31272e-107	0.605336	0.984	0.847	2.04867e-102	8
Tsc22d1	2.62504e-101	0.600966	0.993	0.888	8.51905e-97	8
Dcx	3.09233e-72	0.600013	0.92	0.693	1.00355e-67	8
Barhl2	0	0.598078	0.392	0.016	0	8
Tnrc6c	1.75164e-55	0.590376	0.887	0.791	5.6846e-51	8
Ina	3.54238e-68	0.589676	0.993	0.767	1.14961e-63	8
Ptma	2.69514e-101	0.581128	1	0.996	8.74653e-97	8
Tubb5	3.02475e-94	0.579617	1	0.992	9.81621e-90	8
Tmem35	1.34484e-105	0.576113	0.631	0.213	4.36441e-101	8
Serpini1	1.31037e-73	0.574854	0.655	0.334	4.25255e-69	8
Cnn3	1.92258e-58	0.572951	0.7	0.356	6.23936e-54	8
Celf4	9.77558e-71	0.57274	0.995	0.83	3.17247e-66	8
Ddah2	4.67855e-74	0.566204	0.951	0.773	1.51833e-69	8
Lmx1b	0	0.559642	0.502	0.034	0	8
Tmeff1	3.51698e-75	0.559348	0.96	0.7	1.14137e-70	8
Rnf165	4.89401e-69	0.558476	0.833	0.54	1.58825e-64	8
Runx1t1	1.53884e-37	0.556547	0.777	0.59	4.994e-33	8
Iqcj	3.87355e-282	0.555451	0.444	0.045	1.25708e-277	8
Map1b	8.92432e-91	0.554074	1	0.9	2.89621e-86	8
Marcksl1	8.48332e-99	0.552862	1	0.963	2.75309e-94	8
Ube2d1	2.03085e-75	0.552511	0.92	0.721	6.59073e-71	8
Hdac2	2.95798e-66	0.54995	0.955	0.835	9.59952e-62	8
Slc17a6	6.3861e-70	0.547809	0.723	0.393	2.07248e-65	8
Malat1	7.50272e-65	0.544995	1	0.999	2.43486e-60	8
Nsg2	1.31609e-82	0.544286	0.972	0.815	4.27112e-78	8
Calb2	0.00121846	0.544107	0.469	0.468	1	8
Rgma	6.31778e-79	0.541357	0.514	0.177	2.05031e-74	8
Nsg1	4.08169e-100	0.540607	0.995	0.868	1.32463e-95	8
Crmp1	9.08519e-76	0.537518	0.991	0.806	2.94842e-71	8
Mycl	1.05653e-59	0.52454	0.77	0.512	3.42875e-55	8
Plppr1	9.39221e-99	0.524012	0.697	0.293	3.04805e-94	8
Smarce1	9.4047e-59	0.520937	0.901	0.77	3.05211e-54	8
Uba1	1.46213e-44	0.516845	0.894	0.775	4.74506e-40	8
Zcchc12	6.97826e-50	0.5167	0.953	0.721	2.26465e-45	8
Eif4g2	1.14849e-92	0.514827	0.998	0.981	3.72718e-88	8
Pbx3	7.62705e-79	0.506765	0.549	0.216	2.47521e-74	8
Pxylp1	4.20004e-58	0.506095	0.514	0.235	1.36304e-53	8
Mapt	8.70406e-72	0.502211	0.998	0.837	2.82473e-67	8
Nrn1	8.47378e-104	0.500087	0.533	0.146	2.75e-99	8
Aplp1	4.54874e-74	0.4967	0.988	0.838	1.4762e-69	8
Cacnb3	2.46594e-64	0.495153	0.878	0.634	8.00272e-60	8
Hba-a1	5.05039e-33	0.49499	0.542	0.268	1.639e-28	8
Lingo2	4.30802e-57	0.488703	0.523	0.242	1.39808e-52	8
Ebf3	6.49668e-46	0.485042	0.326	0.114	2.10837e-41	8
Sh3bp5	7.64696e-70	0.484512	0.84	0.575	2.48167e-65	8
Actl6b	2.71783e-62	0.479436	0.89	0.684	8.82017e-58	8
Zfp618	4.02266e-55	0.477088	0.585	0.311	1.30547e-50	8
Bzw2	2.84833e-52	0.475226	0.906	0.75	9.2437e-48	8
Plppr3	5.23166e-55	0.474449	0.939	0.727	1.69783e-50	8
Nova1	9.88411e-57	0.471513	0.671	0.405	3.20769e-52	8
Zfhx2	2.69868e-49	0.46883	0.692	0.443	8.75802e-45	8
Cdk5r1	2.31242e-61	0.467796	0.941	0.771	7.5045e-57	8
Mllt11	9.69423e-77	0.466063	0.998	0.876	3.14607e-72	8
Bcl11b	5.87609e-61	0.465959	0.392	0.127	1.90697e-56	8
Chd3	1.15144e-55	0.463418	0.857	0.655	3.73676e-51	8
C1ql3	5.8739e-108	0.460887	0.265	0.041	1.90626e-103	8
Stmn4	6.82829e-44	0.459751	0.984	0.79	2.21598e-39	8
Ebf2	2.87118e-37	0.456652	0.246	0.08	9.31786e-33	8
H3f3b	1.37859e-71	0.455513	1	0.997	4.47394e-67	8
Atp5o	4.3039e-45	0.454955	0.791	0.433	1.39674e-40	8
Gm28050	4.68321e-77	0.45483	0.425	0.139	1.51984e-72	8
Cdc42ep3	1.42746e-54	0.453991	0.678	0.396	4.63254e-50	8
Carhsp1	1.67934e-47	0.450976	0.8	0.53	5.44995e-43	8
Tceb1	4.39825e-55	0.449247	0.798	0.423	1.42736e-50	8
Ubqln2	3.48512e-47	0.44894	0.927	0.79	1.13103e-42	8
Ntng1	2.21802e-13	0.446469	0.509	0.409	7.19813e-09	8
Btf3l4	1.66183e-49	0.445333	0.878	0.647	5.39313e-45	8
Ypel1	1.08759e-52	0.444701	0.709	0.449	3.52955e-48	8
Chl1	2.9512e-45	0.444094	0.744	0.47	9.57754e-41	8
Crip2	2.14675e-53	0.441862	0.927	0.766	6.96686e-49	8
Sh3bp1	4.01534e-47	0.441694	0.709	0.445	1.3031e-42	8
Cnih2	2.89705e-61	0.440544	0.995	0.824	9.40181e-57	8
Hbb-y	1.59142e-50	0.439382	0.667	0.287	5.16464e-46	8
Actg1	7.83699e-81	0.437766	1	0.999	2.54334e-76	8
Mmd	4.57827e-50	0.436955	0.805	0.591	1.48579e-45	8
Evl	7.2111e-66	0.435877	0.984	0.931	2.34022e-61	8
Cxx1b	9.48288e-51	0.43431	0.735	0.399	3.07748e-46	8
Khdrbs2	9.75678e-48	0.433337	0.634	0.377	3.16637e-43	8
Dbn1	4.35876e-44	0.432951	0.965	0.813	1.41455e-39	8
Arpp21	1.13994e-55	0.432401	0.347	0.115	3.69945e-51	8
Zfp428	5.33039e-56	0.429596	0.965	0.803	1.72987e-51	8
Gpr85	2.06231e-46	0.428979	0.763	0.528	6.69282e-42	8
Cxx1a	2.12546e-49	0.428037	0.803	0.432	6.89776e-45	8
Mpnd	1.7838e-47	0.427097	0.838	0.667	5.78897e-43	8
Parp6	1.30758e-47	0.425147	0.864	0.68	4.24349e-43	8
Samd14	8.60246e-47	0.425079	0.887	0.709	2.79176e-42	8
Wbp1	3.03704e-38	0.424266	0.732	0.54	9.85611e-34	8
Selk	2.4327e-39	0.422169	0.833	0.449	7.89484e-35	8
2700060E02Rik	5.01778e-43	0.420903	0.822	0.438	1.62842e-38	8
Sepw1	1.39226e-33	0.42037	0.85	0.454	4.51832e-29	8
Ilf2	6.75263e-41	0.418835	0.901	0.771	2.19143e-36	8
Spock3	0.00375831	0.417909	0.369	0.358	1	8
Hmgn1	1.11385e-55	0.416162	0.995	0.967	3.61478e-51	8
H3f3a	3.27559e-72	0.414177	0.998	0.995	1.06303e-67	8
Smarcd1	5.86493e-43	0.410779	0.768	0.562	1.90334e-38	8
C77370	1.68855e-32	0.41065	0.378	0.173	5.47984e-28	8
Shank1	5.5473e-35	0.410125	0.768	0.593	1.80027e-30	8
2310036O22Rik	2.62434e-45	0.409899	0.789	0.43	8.51677e-41	8
Rbm4b	8.51289e-45	0.407732	0.923	0.786	2.76269e-40	8
2010107G23Rik	8.36906e-44	0.407213	0.505	0.247	2.71601e-39	8
Cxadr	6.52568e-46	0.404092	0.826	0.609	2.11778e-41	8
Khdrbs1	6.52854e-44	0.401208	0.946	0.853	2.11871e-39	8
PISD	8.02251e-51	0.401162	0.573	0.271	2.60355e-46	8
Brwd1	9.72848e-43	0.395254	0.878	0.764	3.15718e-38	8
Vopp1	9.35875e-39	0.394702	0.685	0.478	3.0372e-34	8
Fscn1	1.83718e-45	0.394275	0.972	0.913	5.9622e-41	8
Ptms	3.32819e-70	0.393845	0.998	0.984	1.0801e-65	8
Trp53i11	2.70397e-44	0.393333	0.721	0.422	8.77519e-40	8
Prdx2	4.68164e-51	0.387523	0.995	0.972	1.51933e-46	8
Hnrnpr	8.19762e-44	0.387463	0.946	0.842	2.66037e-39	8
Fnbp1l	1.62034e-45	0.384059	0.923	0.788	5.2585e-41	8
Shd	3.97855e-40	0.383905	0.735	0.552	1.29116e-35	8
Ahsa2	5.59979e-45	0.383576	0.746	0.519	1.8173e-40	8
Fam134a	1.4799e-42	0.382006	0.617	0.331	4.80273e-38	8
Dlgap4	2.97593e-49	0.381672	0.934	0.825	9.6578e-45	8
Tonsl	4.04833e-42	0.380804	0.768	0.455	1.3138e-37	8
Psip1	2.55157e-50	0.379855	0.962	0.843	8.28059e-46	8
Clmp	1.50079e-36	0.37923	0.7	0.475	4.87052e-32	8
Wbp5	7.69531e-41	0.378444	0.824	0.445	2.49736e-36	8
Maged1	1.57636e-36	0.378013	0.995	0.933	5.11577e-32	8
Reep1	8.58127e-40	0.376487	0.904	0.715	2.78488e-35	8
Tubb4a	1.93474e-39	0.375882	0.876	0.711	6.27881e-35	8
Kifap3	4.75638e-40	0.374757	0.829	0.682	1.54359e-35	8
Hba-a2	5.48524e-25	0.372881	0.455	0.241	1.78013e-20	8
Pkia	8.00875e-42	0.372657	0.843	0.675	2.59908e-37	8
Ip6k2	1.69614e-41	0.369095	0.871	0.693	5.50448e-37	8
Srp54b	6.35873e-41	0.366874	0.624	0.336	2.0636e-36	8
Serf1	1.05905e-42	0.365485	0.969	0.834	3.43693e-38	8
Elavl3	3.42638e-40	0.363537	0.993	0.808	1.11196e-35	8
Ing4	1.39528e-27	0.362203	0.728	0.615	4.52811e-23	8
Wasf1	2.86938e-32	0.360767	0.7	0.53	9.312e-28	8
Ncs1	2.35853e-35	0.360609	0.796	0.656	7.65414e-31	8
Idh1	4.43414e-30	0.36015	0.887	0.777	1.43901e-25	8
Sh3bgrl	1.21737e-33	0.360083	0.84	0.717	3.95075e-29	8
Chn1	1.25957e-43	0.359714	0.845	0.66	4.08769e-39	8
Dpysl5	1.01696e-39	0.359475	0.824	0.643	3.30033e-35	8
Ncan	1.69038e-36	0.359265	0.857	0.676	5.48579e-32	8
Trib2	3.384e-40	0.359149	0.65	0.409	1.09821e-35	8
2700094K13Rik	7.85922e-39	0.358087	0.721	0.401	2.55055e-34	8
Mkrn1	2.40117e-43	0.35747	0.946	0.853	7.79251e-39	8
Gstm7	2.99124e-26	0.356692	0.603	0.433	9.70746e-22	8
Olfm1	1.18788e-46	0.356353	0.887	0.631	3.85503e-42	8
Mex3a	2.39188e-24	0.355276	0.648	0.479	7.76237e-20	8
Bcl2l1	5.64167e-33	0.355047	0.754	0.608	1.83089e-28	8
Chd3os	1.40328e-32	0.354438	0.871	0.713	4.55408e-28	8
Rbfox2	6.45165e-35	0.352957	0.939	0.78	2.09375e-30	8
Vstm2a	2.20409e-18	0.352698	0.441	0.308	7.15295e-14	8
Lrp1b	3.66027e-17	0.352539	0.411	0.276	1.18787e-12	8
Prmt1	1.69729e-33	0.352424	0.955	0.899	5.50821e-29	8
Gdpd1	1.11393e-32	0.350237	0.803	0.64	3.61502e-28	8
Nono	2.98817e-35	0.349496	0.944	0.903	9.6975e-31	8
Cirbp	3.07657e-48	0.348554	0.991	0.942	9.98438e-44	8
Rbmx	5.3168e-26	0.347651	0.704	0.55	1.72546e-21	8
Sep15	6.51589e-36	0.347421	0.768	0.429	2.1146e-31	8
Smarca4	1.19839e-25	0.345803	0.829	0.749	3.88915e-21	8
Dbndd1	1.28722e-37	0.345553	0.65	0.426	4.17742e-33	8
Dcakd	5.28778e-36	0.344518	0.869	0.731	1.71604e-31	8
Fam195b	2.35835e-34	0.343399	0.695	0.405	7.65357e-30	8
Pak1	1.46652e-38	0.343292	0.852	0.722	4.75928e-34	8
Hmgb3	3.65702e-29	0.342923	0.969	0.832	1.18681e-24	8
Neto2	5.50164e-30	0.34238	0.509	0.314	1.78545e-25	8
Pantr1	4.31046e-98	0.341458	0.434	0.107	1.39888e-93	8
Iglon5	2.0991e-49	0.341055	0.528	0.255	6.81221e-45	8
Traf4	8.88135e-31	0.338497	0.732	0.506	2.88227e-26	8
Fam171a2	4.91742e-34	0.337626	0.857	0.683	1.59585e-29	8
G3bp2	4.49337e-35	0.336918	0.897	0.843	1.45823e-30	8
Gdi1	2.68569e-34	0.336917	0.972	0.86	8.71586e-30	8
Ubald2	2.05872e-29	0.334926	0.85	0.748	6.68117e-25	8
Vash2	1.58961e-46	0.334916	0.514	0.254	5.15875e-42	8
Syt4	3.6326e-22	0.334379	0.892	0.7	1.17889e-17	8
Zbtb7c	2.70557e-51	0.333254	0.364	0.133	8.78037e-47	8
Snn	1.64076e-33	0.333167	0.765	0.588	5.32475e-29	8
Rundc3a	7.24101e-34	0.332286	0.918	0.759	2.34993e-29	8
AW551984	1.21606e-14	0.329762	0.709	0.607	3.94648e-10	8
Erh	4.31949e-31	0.329746	0.974	0.919	1.4018e-26	8
4931428F04Rik	7.28719e-30	0.32965	0.582	0.395	2.36491e-25	8
Hnrnph3	4.37966e-37	0.329587	0.864	0.727	1.42133e-32	8
Trim28	5.92806e-28	0.32948	0.883	0.793	1.92383e-23	8
Thra	2.4851e-38	0.328818	0.984	0.866	8.0649e-34	8
Zc4h2	4.69306e-37	0.328805	0.502	0.273	1.52304e-32	8
Tceb2	2.56109e-25	0.328656	0.838	0.454	8.31151e-21	8
Srsf4	4.86992e-26	0.327542	0.709	0.585	1.58044e-21	8
Camk2n1	7.43624e-21	0.327453	0.81	0.73	2.41328e-16	8
Glra2	2.11553e-44	0.327399	0.404	0.163	6.86553e-40	8
Hsp90aa1	1.61418e-46	0.326988	0.993	0.978	5.23851e-42	8
Palm	3.80972e-30	0.326955	0.84	0.706	1.23637e-25	8
Tmem132a	3.94292e-35	0.326384	0.772	0.599	1.2796e-30	8
Kdm2b	2.38791e-24	0.323899	0.742	0.637	7.74949e-20	8
Podxl2	2.58862e-34	0.322344	0.967	0.846	8.40085e-30	8
Atxn7l3b	5.92951e-53	0.322193	0.991	0.939	1.9243e-48	8
Phyhipl	2.18607e-30	0.321072	0.772	0.623	7.09446e-26	8
Narf	1.95887e-25	0.320428	0.552	0.383	6.35713e-21	8
Vps72	2.75886e-29	0.320122	0.81	0.7	8.95332e-25	8
Apc2	9.5781e-29	0.319829	0.749	0.59	3.10838e-24	8
Nkain3	2.96895e-31	0.318719	0.509	0.296	9.63512e-27	8
1810026J23Rik	3.19839e-44	0.318568	0.5	0.235	1.03797e-39	8
Hnrnpa1	1.09052e-37	0.318545	0.993	0.965	3.53906e-33	8
Acvr2b	5.38329e-21	0.317736	0.617	0.468	1.74704e-16	8
Pafah1b3	8.32076e-35	0.317676	0.967	0.873	2.70034e-30	8
Dnaja1	2.23104e-38	0.315468	0.988	0.968	7.24039e-34	8
Strn4	1.59598e-30	0.315243	0.833	0.738	5.17942e-26	8
Tmem163	1.21216e-36	0.314708	0.629	0.362	3.93383e-32	8
Fez1	2.10099e-35	0.314469	0.984	0.823	6.81833e-31	8
Eif4a2	2.23496e-42	0.313881	0.979	0.951	7.2531e-38	8
Akap9	2.6545e-27	0.313645	0.878	0.785	8.61466e-23	8
Tagln3	1.34622e-30	0.313508	0.977	0.803	4.36888e-26	8
Rab33a	3.10664e-34	0.31278	0.54	0.318	1.0082e-29	8
Morn4	1.59896e-29	0.311027	0.575	0.385	5.1891e-25	8
Scn3b	9.07814e-24	0.310925	0.674	0.539	2.94613e-19	8
2810428I15Rik	2.01708e-29	0.310657	0.627	0.372	6.54603e-25	8
Dazap1	1.11853e-26	0.309367	0.904	0.81	3.62998e-22	8
Zfp422	1.04266e-30	0.309329	0.73	0.549	3.38374e-26	8
Rfng	1.6519e-26	0.309117	0.585	0.419	5.36092e-22	8
6330403K07Rik	2.95862e-33	0.308537	0.993	0.905	9.60161e-29	8
Kif5c	1.90882e-30	0.307553	0.958	0.787	6.1947e-26	8
Taf13	3.92271e-34	0.307355	0.601	0.385	1.27304e-29	8
Ptp4a1	1.2608e-34	0.306552	0.944	0.848	4.09167e-30	8
Zfp462	3.41742e-23	0.306449	0.624	0.465	1.10906e-18	8
Ctbp1	5.54613e-35	0.3052	0.984	0.933	1.79989e-30	8
Igsf9	7.581e-26	0.305091	0.54	0.358	2.46026e-21	8
Rab11b	6.96034e-37	0.304243	0.962	0.916	2.25884e-32	8
Pcsk2	9.44839e-24	0.303385	0.552	0.348	3.06629e-19	8
Raf1	1.80023e-20	0.301985	0.707	0.616	5.8423e-16	8
Whsc1	2.82035e-35	0.300619	0.563	0.305	9.15288e-31	8
Hes6	2.50497e-20	0.300353	0.7	0.58	8.12937e-16	8
Mlf2	7.56316e-35	0.299467	0.965	0.919	2.45447e-30	8
Nell2	2.61081e-32	0.299183	0.772	0.543	8.47285e-28	8
Gramd1a	4.82598e-20	0.298169	0.833	0.761	1.56618e-15	8
Macrod2	3.32767e-21	0.297819	0.627	0.505	1.07993e-16	8
Zfp57	1.14255e-25	0.297055	0.601	0.435	3.70792e-21	8
Mex3b	2.72746e-26	0.297032	0.434	0.251	8.85144e-22	8
Myeov2	1.80197e-28	0.296996	0.768	0.442	5.84794e-24	8
H2afv	8.08332e-30	0.29669	0.906	0.823	2.62328e-25	8
Midn	2.1912e-23	0.29584	0.758	0.639	7.11109e-19	8
Samd10	6.7639e-25	0.29487	0.789	0.621	2.19509e-20	8
Ppdpf	3.31654e-31	0.294542	0.955	0.841	1.07632e-26	8
Gpm6a	3.6075e-23	0.294381	0.937	0.799	1.17074e-18	8
Gng2	9.75952e-34	0.293987	0.946	0.881	3.16726e-29	8
Pcbp4	1.26511e-28	0.293947	0.953	0.795	4.10566e-24	8
Pbx1	2.37177e-28	0.293929	0.899	0.788	7.69712e-24	8
Nhp2l1	9.3899e-29	0.293584	0.737	0.427	3.0473e-24	8
Pdzrn3	2.25361e-32	0.293012	0.202	0.063	7.31363e-28	8
Fam103a1	2.33164e-32	0.292584	0.876	0.809	7.56688e-28	8
Cxxc4	9.53723e-21	0.292011	0.681	0.55	3.09512e-16	8
Hnrnpab	4.47832e-27	0.291943	0.96	0.891	1.45335e-22	8
Zscan21	1.70771e-23	0.291412	0.514	0.346	5.54204e-19	8
Nipsnap1	1.5257e-25	0.291224	0.744	0.606	4.95135e-21	8
BC029214	4.08048e-32	0.29103	0.486	0.254	1.32424e-27	8
Blcap	3.91749e-30	0.29048	0.913	0.794	1.27134e-25	8
Tmem44	3.3339e-30	0.289379	0.472	0.266	1.08195e-25	8
Map2	8.27546e-31	0.288893	0.937	0.806	2.68563e-26	8
Trim32	2.03511e-19	0.288603	0.688	0.592	6.60454e-15	8
Rnf187	4.01768e-45	0.288376	0.998	0.958	1.30386e-40	8
Tox3	2.19353e-15	0.288231	0.627	0.521	7.11868e-11	8
Ppil1	2.05845e-18	0.287881	0.566	0.462	6.68028e-14	8
Trim35	1.04893e-25	0.286795	0.918	0.805	3.4041e-21	8
Rbm18	2.16464e-26	0.286632	0.768	0.656	7.02491e-22	8
Tsg101	4.53408e-27	0.286313	0.934	0.879	1.47144e-22	8
Tax1bp3	1.81615e-22	0.285558	0.707	0.532	5.89396e-18	8
Dpcd	1.15557e-30	0.285267	0.427	0.218	3.75018e-26	8
Afap1	3.39365e-20	0.285194	0.484	0.328	1.10134e-15	8
Zfp512	3.75387e-23	0.284953	0.704	0.568	1.21824e-18	8
Mapk8	1.67511e-23	0.284625	0.61	0.456	5.43622e-19	8
Lnp	2.71267e-30	0.284335	0.427	0.22	8.80343e-26	8
Gdap1l1	1.6223e-23	0.283634	0.808	0.665	5.26486e-19	8
Nrxn1	2.3898e-30	0.283464	0.932	0.744	7.75562e-26	8
Carkd	4.27032e-32	0.28322	0.469	0.246	1.38585e-27	8
Zfos1	3.91647e-33	0.28275	0.704	0.405	1.27101e-28	8
Gnb2l1	2.48191e-23	0.281826	0.824	0.45	8.05456e-19	8
Cdk4	4.12659e-25	0.281176	0.948	0.864	1.3392e-20	8
Ptpn5	1.6506e-24	0.281008	0.714	0.546	5.35668e-20	8
Rnf182	1.28849e-37	0.280925	0.404	0.183	4.18154e-33	8
Mn1	1.02086e-15	0.280651	0.549	0.419	3.31299e-11	8
Mllt3	9.68782e-20	0.280528	0.592	0.45	3.14399e-15	8
R3hdm4	2.78386e-28	0.280037	0.836	0.784	9.03446e-24	8
Tia1	4.07251e-23	0.279363	0.911	0.819	1.32165e-18	8
Ssbp2	4.09587e-21	0.279177	0.822	0.745	1.32923e-16	8
Gltscr2	1.44288e-24	0.278474	0.601	0.368	4.68257e-20	8
Ube2d2a	2.04072e-38	0.278437	0.984	0.953	6.62276e-34	8
Arf2	2.57334e-23	0.278355	0.721	0.617	8.35125e-19	8
Cdh2	8.4851e-21	0.277787	0.819	0.7	2.75367e-16	8
Fubp1	1.38563e-20	0.277669	0.845	0.819	4.49677e-16	8
C1qtnf4	3.33954e-19	0.277174	0.85	0.689	1.08378e-14	8
Sept6	2.23405e-26	0.276896	0.671	0.465	7.25017e-22	8
Fam69b	2.71603e-26	0.276619	0.847	0.694	8.81435e-22	8
Lmnb1	7.68268e-25	0.275853	0.622	0.425	2.49326e-20	8
Zfp358	3.87275e-17	0.275845	0.608	0.506	1.25682e-12	8
Rtn1	1.13551e-30	0.275805	1	0.947	3.68506e-26	8
Phactr1	1.70149e-20	0.275035	0.592	0.459	5.52184e-16	8
Smarcd3	1.64356e-22	0.274362	0.824	0.695	5.33383e-18	8
Elmo1	1.13134e-19	0.27413	0.636	0.49	3.67153e-15	8
Brd3	3.86157e-21	0.274126	0.85	0.763	1.25319e-16	8
Cox19	1.7787e-21	0.27384	0.777	0.682	5.77243e-17	8
Rab2a	6.08959e-35	0.273029	0.986	0.943	1.97625e-30	8
Mir124a-1hg	1.91383e-26	0.273002	0.357	0.18	6.21096e-22	8
Fdft1	1.84058e-17	0.272904	0.784	0.683	5.97324e-13	8
March5	2.09101e-24	0.272839	0.81	0.732	6.78597e-20	8
2700069I18Rik	1.53664e-62	0.27238	0.27	0.067	4.98686e-58	8
Ccdc124	1.77169e-25	0.271743	0.803	0.73	5.74966e-21	8
Gm2694	2.12783e-22	0.271714	0.495	0.295	6.90544e-18	8
Auts2	9.70978e-24	0.271369	0.751	0.589	3.15111e-19	8
Slco5a1	1.58423e-29	0.271331	0.331	0.152	5.14131e-25	8
Rtn3	3.8902e-34	0.270991	0.977	0.954	1.26249e-29	8
Spats2l	2.5232e-16	0.270762	0.385	0.247	8.18853e-12	8
Eno1	2.20894e-15	0.270571	0.852	0.828	7.16868e-11	8
Meis3	5.67444e-23	0.270503	0.784	0.638	1.84153e-18	8
Ythdf2	1.34369e-16	0.270151	0.714	0.643	4.36068e-12	8
Scamp1	3.02245e-27	0.269719	0.786	0.672	9.80875e-23	8
Zfp637	1.79452e-22	0.269638	0.714	0.604	5.82376e-18	8
Cntnap5a	1.14497e-07	0.268938	0.38	0.317	0.00371578	8
Hnrnpa2b1	3.15058e-22	0.268391	0.984	0.974	1.02246e-17	8
Rbfox1	3.69606e-15	0.268248	0.526	0.385	1.19948e-10	8
Hgs	1.82917e-27	0.267551	0.399	0.207	5.93619e-23	8
Cfl1	1.24061e-42	0.267472	1	0.995	4.02614e-38	8
Clcn4	2.68007e-16	0.267296	0.683	0.619	8.69763e-12	8
Rraga	7.18556e-20	0.266902	0.854	0.788	2.33193e-15	8
Med22	3.75635e-19	0.266755	0.697	0.604	1.21905e-14	8
Top2b	1.55191e-16	0.266287	0.793	0.748	5.03642e-12	8
2700029M09Rik	7.9848e-25	0.265575	0.474	0.274	2.59131e-20	8
Kctd4	7.3373e-43	0.265123	0.317	0.114	2.38117e-38	8
Hnrnpdl	4.95813e-27	0.265092	0.967	0.929	1.60906e-22	8
Dhx30	4.85498e-19	0.264239	0.716	0.624	1.57559e-14	8
Akirin2	7.16849e-21	0.263491	0.88	0.868	2.32639e-16	8
Tmem57	3.92308e-22	0.262929	0.749	0.656	1.27316e-17	8
Ccnt2	6.28376e-20	0.262924	0.648	0.521	2.03927e-15	8
Tmsb10	7.03644e-23	0.262618	1	0.989	2.28354e-18	8
Ptbp2	5.72291e-20	0.262533	0.805	0.718	1.85725e-15	8
Nt5dc2	5.21317e-15	0.262458	0.69	0.576	1.69183e-10	8
Nap1l4	2.53458e-18	0.262292	0.852	0.815	8.22548e-14	8
Cpe	2.84637e-35	0.261821	0.977	0.885	9.23734e-31	8
Wnt5a	2.88368e-21	0.261729	0.268	0.127	9.35841e-17	8
Tle1	1.27226e-18	0.261673	0.406	0.254	4.12887e-14	8
Nyap1	1.64791e-18	0.260763	0.704	0.588	5.34795e-14	8
Sema6c	3.21741e-21	0.260661	0.502	0.337	1.04415e-16	8
Cadm4	6.77345e-17	0.260202	0.676	0.569	2.19819e-12	8
Cd200	1.40994e-19	0.260119	0.925	0.744	4.57567e-15	8
Ezh2	1.87182e-21	0.259973	0.477	0.298	6.07461e-17	8
Pebp1	6.65444e-39	0.259111	0.995	0.982	2.15956e-34	8
Pnisr	1.31977e-20	0.259092	0.876	0.8	4.28305e-16	8
Ppp1cb	7.57848e-23	0.258841	0.824	0.784	2.45944e-18	8
Onecut2	1.94167e-23	0.25841	0.392	0.203	6.3013e-19	8
Zfp521	1.6796e-24	0.258316	0.31	0.152	5.45079e-20	8
March1	9.96118e-09	0.258311	0.484	0.429	0.00032327	8
Praf2	2.56438e-26	0.258245	0.681	0.506	8.3222e-22	8
Zik1	4.70951e-24	0.25822	0.408	0.235	1.52838e-19	8
Rnf5	2.70339e-20	0.257893	0.883	0.815	8.77332e-16	8
Arnt2	1.39672e-17	0.257857	0.58	0.456	4.53278e-13	8
Wdr47	2.25414e-17	0.257178	0.552	0.427	7.31535e-13	8
Ehd1	2.76876e-21	0.256273	0.697	0.555	8.98544e-17	8
Lin7c	1.35727e-19	0.256182	0.803	0.748	4.40476e-15	8
Grin3a	3.42099e-07	0.255833	0.343	0.271	0.0111021	8
Fto	4.26242e-20	0.255707	0.676	0.564	1.38328e-15	8
Bag6	8.91003e-16	0.255029	0.772	0.744	2.89157e-11	8
Btbd9	2.48394e-19	0.254503	0.592	0.466	8.06113e-15	8
Hdgfrp2	1.76387e-24	0.254244	0.437	0.246	5.72429e-20	8
Arhgap33	4.62592e-19	0.254217	0.641	0.518	1.50125e-14	8
Zbtb12	1.12217e-16	0.254192	0.516	0.389	3.64179e-12	8
Rgs3	9.42955e-18	0.25395	0.493	0.356	3.06017e-13	8
Rtf1	2.87805e-20	0.253885	0.854	0.796	9.34014e-16	8
Ywhaq	7.95978e-32	0.253689	0.993	0.969	2.58319e-27	8
Rnf114	8.13947e-16	0.253567	0.505	0.376	2.6415e-11	8
Cript	5.92505e-23	0.253052	0.857	0.802	1.92286e-18	8
Acat2	1.54548e-16	0.252906	0.803	0.685	5.01553e-12	8
Cacfd1	7.5591e-21	0.252607	0.754	0.646	2.45315e-16	8
Dtx3	7.58114e-23	0.252462	0.883	0.781	2.46031e-18	8
Ube2v2	3.37179e-23	0.252407	0.92	0.844	1.09425e-18	8
Map1lc3b	4.32266e-28	0.252223	0.967	0.945	1.40283e-23	8
Azin1	1.30659e-17	0.252115	0.683	0.615	4.24027e-13	8
Tle2	6.40744e-25	0.251977	0.357	0.181	2.07941e-20	8
Epb41l4a	4.78515e-21	0.251935	0.369	0.206	1.55292e-16	8
Bmi1	1.13305e-20	0.251601	0.434	0.272	3.6771e-16	8
Ska2	1.60886e-19	0.250784	0.418	0.265	5.22123e-15	8
Opcml	0.00502611	0.250356	0.392	0.372	1	8
Actr1a	1.34914e-17	0.250169	0.796	0.735	4.37838e-13	8

## Sheet:  Microglia
Figure 1-source data 2. Feature genes that define each of the 11 Pomc clusters
integrated across all six developmental stages.
The data are sorted from highest to lowest for each integrated custer by average log fold-change > 0.25
(avg_logFC) of gene expression in the featured cluster relative to all other clusters
pct.1, Percentage of cells in the indicated cluster with significant differential gene expression
pct.2, Percentage of cells in all other clusters with significant differential gene expression
p-val, p-value
p_val_adj, adjusted p-value for multiple comparisons
The Wilcoxon test was performed to identify the differentially expressed genes in each cluster
Gene	p_val	avg_logFC	pct.1	pct.2	p_val_adj	cluster
C1qb	0	3.69262	0.904	0.119	0	9
Hexb	0	3.65795	0.918	0.248	0	9
C1qa	0	3.60882	0.904	0.101	0	9
C1qc	0	3.5806	0.901	0.09	0	9
Lgmn	0	3.15277	0.944	0.461	0	9
Fcrls	0	3.05276	0.899	0.061	0	9
Ctss	0	3.03699	0.899	0.058	0	9
Tyrobp	0	2.97634	0.899	0.072	0	9
Selenop	0	2.97481	0.894	0.104	0	9
P2ry12	0	2.8948	0.876	0.047	0	9
Fcer1g	0	2.89102	0.902	0.057	0	9
Cst3	0	2.86629	0.998	0.95	0	9
Csf1r	0	2.86055	0.899	0.059	0	9
Ctsd	0	2.69433	0.972	0.681	0	9
Sparc	0	2.63904	0.94	0.15	0	9
Crybb1	0	2.63841	0.839	0.044	0	9
Trem2	0	2.61715	0.888	0.059	0	9
Laptm5	0	2.48203	0.904	0.045	0	9
Ccl3	0	2.4629	0.664	0.068	0	9
Ly86	0	2.45606	0.896	0.032	0	9
Cx3cr1	0	2.33195	0.876	0.033	0	9
Rgs10	0	2.30232	0.909	0.212	0	9
Ctsb	0	2.29495	0.979	0.75	0	9
Gpr34	0	2.28692	0.866	0.031	0	9
Apoe	0	2.23273	0.985	0.392	0	9
Grn	0	2.22285	0.963	0.295	0	9
Itm2b	0	2.20782	0.998	0.907	0	9
Ier3	0	2.20373	0.78	0.102	0	9
Ctsz	0	2.16719	0.966	0.338	0	9
Ctsl	0	2.14403	0.977	0.783	0	9
Nfkbia	0	2.13716	0.858	0.434	0	9
Unc93b1	0	2.13715	0.904	0.041	0	9
Arpc1b	0	2.12617	0.954	0.113	0	9
Selplg	0	2.0959	0.821	0.093	0	9
Cyba	0	2.05227	0.959	0.07	0	9
Fcgr3	0	2.04949	0.891	0.027	0	9
B2m	0	1.98415	0.976	0.202	0	9
Ltc4s	0	1.96196	0.876	0.028	0	9
Ccl4	0	1.95101	0.507	0.049	0	9
Tmem119	0	1.93375	0.85	0.033	0	9
Olfml3	0	1.91297	0.871	0.05	0	9
Lyz2	0	1.87336	0.609	0.032	0	9
Ifngr1	0	1.86949	0.924	0.137	0	9
Serinc3	0	1.85747	0.972	0.66	0	9
Pld4	0	1.84954	0.886	0.032	0	9
Spi1	0	1.84343	0.884	0.022	0	9
Junb	0	1.84336	0.888	0.484	0	9
Itgb5	0	1.81442	0.916	0.058	0	9
Anxa3	0	1.80418	0.907	0.041	0	9
Cd9	0	1.80198	0.849	0.139	0	9
Mef2c	0	1.78697	0.899	0.199	0	9
Man2b1	0	1.78526	0.903	0.15	0	9
Lpcat2	0	1.77461	0.85	0.065	0	9
Aif1	0	1.76989	0.874	0.035	0	9
Sat1	0	1.75675	0.943	0.353	0	9
Cyth4	0	1.74359	0.881	0.025	0	9
Sirpa	0	1.72356	0.914	0.469	0	9
Trf	0	1.71606	0.901	0.096	0	9
Ccl2	0	1.70374	0.51	0.03	0	9
Clic1	0	1.70349	0.984	0.277	0	9
Hpgds	0	1.70189	0.885	0.088	0	9
Maf	0	1.69996	0.898	0.095	0	9
Rnase4	0	1.67886	0.908	0.057	0	9
Hexa	0	1.67186	0.959	0.473	0	9
Ctsa	0	1.635	0.931	0.375	0	9
Pf4	2.57606e-205	1.62754	0.123	0.009	8.36008e-201	9
Siglech	0	1.62547	0.813	0.018	0	9
Tmsb4x	0	1.6173	1	0.999	0	9
Cd53	0	1.59293	0.871	0.018	0	9
Ptpn18	0	1.58566	0.871	0.056	0	9
Txnip	0	1.57847	0.858	0.109	0	9
Bin1	0	1.57436	0.96	0.738	0	9
Gadd45b	0	1.56195	0.676	0.092	0	9
Cyfip1	0	1.51444	0.918	0.226	0	9
Cd68	0	1.51053	0.845	0.061	0	9
Tgfb1	0	1.50978	0.878	0.069	0	9
Pnp	0	1.50716	0.907	0.322	0	9
Zfp36	0	1.50364	0.781	0.039	0	9
Evi2a	0	1.49586	0.839	0.02	0	9
Snx5	0	1.49269	0.969	0.476	0	9
Kctd12	0	1.46999	0.895	0.198	0	9
Vsir	0	1.46824	0.839	0.025	0	9
Fam105a	0	1.45152	0.874	0.179	0	9
Glul	0	1.44376	0.958	0.455	0	9
Npl	0	1.44297	0.847	0.092	0	9
Qk	0	1.44009	0.961	0.344	0	9
Lyn	0	1.4366	0.864	0.043	0	9
Arhgdib	0	1.43363	0.854	0.038	0	9
Atf3	0	1.4185	0.649	0.048	0	9
Cmtm7	0	1.41511	0.904	0.071	0	9
F11r	0	1.41455	0.797	0.022	0	9
Gas6	0	1.40767	0.865	0.294	0	9
H2-D1	0	1.38831	0.864	0.368	0	9
Cd300c2	0	1.38506	0.814	0.016	0	9
Rnf130	0	1.38283	0.933	0.28	0	9
Ctsc	0	1.38198	0.771	0.036	0	9
Adgre1	0	1.38193	0.865	0.102	0	9
Ier5	0	1.38085	0.895	0.327	0	9
Jun	0	1.36722	0.943	0.644	0	9
P2ry13	0	1.36336	0.795	0.013	0	9
Efhd2	0	1.35999	0.909	0.359	0	9
Mafb	0	1.35684	0.801	0.087	0	9
Ptgs1	0	1.35536	0.819	0.022	0	9
Apbb1ip	0	1.34524	0.801	0.023	0	9
Rhob	0	1.34155	0.949	0.791	0	9
Lst1	0	1.34047	0.812	0.117	0	9
Ighm	0	1.33693	0.78	0.016	0	9
Hmgb2	0	1.33475	0.698	0.353	0	9
Rac2	0	1.33446	0.825	0.018	0	9
Irf8	0	1.32904	0.821	0.022	0	9
Npc2	0	1.32514	0.985	0.809	0	9
H2-K1	0	1.32388	0.823	0.059	0	9
Coro1a	0	1.31644	0.874	0.563	0	9
Zfp36l2	0	1.31613	0.901	0.151	0	9
Scamp2	0	1.31189	0.901	0.241	0	9
Slco2b1	0	1.30608	0.836	0.02	0	9
Pmepa1	0	1.30476	0.807	0.255	0	9
Bin2	0	1.3037	0.784	0.018	0	9
Cfh	0	1.30147	0.855	0.035	0	9
Lamp1	0	1.29438	0.997	0.912	0	9
Ctsh	0	1.2932	0.812	0.024	0	9
Epb41l2	0	1.29314	0.877	0.264	0	9
Pycard	0	1.28804	0.864	0.162	0	9
Bcl2a1b	0	1.28311	0.736	0.014	0	9
Tnf	0	1.27954	0.524	0.015	0	9
Rab3il1	0	1.27603	0.908	0.137	0	9
Ccl12	0	1.27167	0.591	0.013	0	9
Fcgrt	0	1.27149	0.791	0.043	0	9
Mcl1	0	1.26937	0.926	0.603	0	9
Cmtm6	0	1.26261	0.854	0.085	0	9
Abhd12	0	1.26156	0.938	0.564	0	9
Itgam	0	1.26121	0.778	0.017	0	9
Cxcl2	1.73008e-288	1.24341	0.171	0.013	5.61464e-284	9
Icam1	0	1.23779	0.679	0.021	0	9
Lair1	0	1.22994	0.782	0.027	0	9
Ostf1	0	1.22481	0.922	0.259	0	9
Plxdc2	0	1.22369	0.838	0.24	0	9
Vamp8	0	1.21946	0.85	0.055	0	9
Lmo2	0	1.21858	0.825	0.14	0	9
Zeb2	0	1.21622	0.844	0.072	0	9
Fcgr1	0	1.21515	0.79	0.012	0	9
Tnfaip8l2	0	1.2118	0.807	0.013	0	9
Capza2	0	1.20924	0.988	0.894	0	9
Cebpb	0	1.20706	0.827	0.171	0	9
Gpx1	0	1.1903	0.967	0.795	0	9
Ccr5	0	1.18448	0.695	0.013	0	9
Cryba4	0	1.16356	0.727	0.012	0	9
Mpeg1	0	1.16138	0.713	0.015	0	9
Zfp36l1	0	1.1591	0.855	0.077	0	9
Cd81	0	1.15765	0.968	0.924	0	9
Ecscr	0	1.14961	0.753	0.041	0	9
Fyb	0	1.14279	0.793	0.065	0	9
Klf2	0	1.14195	0.479	0.099	0	9
Stab1	0	1.13604	0.646	0.054	0	9
Mrc1	0	1.13201	0.344	0.011	0	9
Fau	0	1.12227	1	0.996	0	9
Ptpn6	0	1.11633	0.796	0.018	0	9
Igfbp4	0	1.11441	0.755	0.25	0	9
Gusb	0	1.11131	0.878	0.316	0	9
Fermt3	0	1.11068	0.792	0.02	0	9
Lcp1	0	1.10789	0.768	0.021	0	9
Hpgd	0	1.10626	0.734	0.053	0	9
Cd52	0	1.1044	0.677	0.013	0	9
Gmfg	0	1.1006	0.761	0.023	0	9
Asah1	0	1.09427	0.92	0.487	0	9
Neat1	0	1.09424	0.618	0.137	0	9
Mbnl1	0	1.08297	0.865	0.347	0	9
Ehd4	0	1.08094	0.753	0.086	0	9
Wasf2	0	1.06745	0.851	0.134	0	9
Creg1	0	1.0658	0.812	0.202	0	9
Lamp2	0	1.06443	0.901	0.316	0	9
Ubc	0	1.06006	0.99	0.959	0	9
Blvrb	0	1.05937	0.753	0.122	0	9
Bmp2k	0	1.05771	0.803	0.186	0	9
Lag3	0	1.05013	0.699	0.087	0	9
Psap	0	1.044	0.987	0.897	0	9
Limd2	0	1.04239	0.952	0.704	0	9
Mt1	0	1.04194	0.755	0.22	0	9
Ppp1r15a	0	1.03859	0.757	0.351	0	9
Cd37	0	1.03763	0.729	0.013	0	9
Fth1	0	1.03345	1	0.995	0	9
P2ry6	0	1.03327	0.727	0.015	0	9
Dusp2	0	1.03213	0.551	0.059	0	9
Nfe2l2	0	1.02639	0.776	0.067	0	9
Tmem86a	0	1.02363	0.768	0.124	0	9
Ccl7	0	1.02106	0.282	0.015	0	9
Tm6sf1	0	1.01942	0.8	0.169	0	9
Rps20	0	1.01708	0.999	0.991	0	9
Fgd2	0	1.01504	0.744	0.027	0	9
Ckb	0	1.01133	0.989	0.933	0	9
Tgfbr1	0	1.00365	0.848	0.41	0	9
Pde3b	0	1.00342	0.769	0.162	0	9
Pdlim4	0	0.997774	0.797	0.06	0	9
Rrbp1	0	0.993944	0.927	0.439	0	9
Ntpcr	0	0.992565	0.807	0.3	0	9
Rap1b	0	0.992424	0.969	0.799	0	9
Ppfia4	0	0.991917	0.786	0.293	0	9
Rps29	0	0.990882	1	0.997	0	9
Psmb8	0	0.9784	0.746	0.018	0	9
Sall1	0	0.977867	0.716	0.031	0	9
Rps6ka1	0	0.977771	0.747	0.117	0	9
Ppp1r18	0	0.975472	0.798	0.144	0	9
Rack1	0	0.973254	0.893	0.436	0	9
Rpl22	0	0.967386	0.995	0.962	0	9
Clta	0	0.966355	0.998	0.983	0	9
Cd14	0	0.965561	0.646	0.011	0	9
Abi3	0	0.959511	0.684	0.01	0	9
Srsf9	0	0.95811	0.928	0.589	0	9
Inpp5d	0	0.956008	0.727	0.015	0	9
Arsb	0	0.954334	0.741	0.204	0	9
Plekho1	0	0.953974	0.866	0.342	0	9
Rhoa	0	0.953625	0.985	0.87	0	9
Ctsf	0	0.952206	0.793	0.29	0	9
Litaf	0	0.949321	0.776	0.069	0	9
Srgap2	0	0.944684	0.827	0.335	0	9
Clec4a2	0	0.944191	0.681	0.01	0	9
Alox5ap	0	0.942682	0.656	0.097	0	9
Gatm	0	0.942358	0.759	0.244	0	9
Syngr2	0	0.938107	0.756	0.058	0	9
Serpine2	0	0.937039	0.871	0.352	0	9
Nckap1l	0	0.934277	0.739	0.014	0	9
Necap2	0	0.932786	0.827	0.196	0	9
Msn	0	0.931486	0.822	0.166	0	9
Hmox1	0	0.925768	0.509	0.049	0	9
Bst2	0	0.922129	0.628	0.042	0	9
Ucp2	0	0.919509	0.893	0.501	0	9
Prkcd	0	0.916578	0.776	0.138	0	9
Sgk1	0	0.916053	0.688	0.25	0	9
Sft2d1	0	0.914859	0.892	0.62	0	9
Tlr2	0	0.911423	0.624	0.015	0	9
Rpl30	0	0.906954	1	0.992	0	9
Arhgap45	0	0.905875	0.69	0.012	0	9
Ube2c	1.46179e-142	0.905826	0.184	0.047	4.74395e-138	9
Gna15	0	0.901018	0.691	0.011	0	9
St3gal6	0	0.89805	0.729	0.078	0	9
Sh3bgrl3	0	0.897685	0.979	0.879	0	9
Rps12	0	0.897295	0.998	0.983	0	9
Cd63	0	0.897173	0.896	0.698	0	9
Myl12a	0	0.896872	0.854	0.291	0	9
Cd300a	0	0.895942	0.672	0.011	0	9
Cd86	0	0.890506	0.684	0.01	0	9
Picalm	0	0.889604	0.899	0.593	0	9
Hcls1	0	0.880111	0.7	0.014	0	9
Ncf2	0	0.876313	0.708	0.014	0	9
Pla2g15	0	0.873973	0.738	0.128	0	9
Ncf1	0	0.87036	0.685	0.034	0	9
Tmbim6	0	0.869176	0.987	0.805	0	9
Ly6e	0	0.867576	0.846	0.55	0	9
Cebpa	0	0.859961	0.659	0.032	0	9
Snx2	0	0.858875	0.849	0.553	0	9
Ninj1	0	0.857454	0.731	0.214	0	9
Pnrc1	0	0.855431	0.901	0.67	0	9
Sipa1	0	0.853684	0.755	0.118	0	9
Tagap	0	0.852201	0.55	0.01	0	9
Hk2	0	0.851515	0.677	0.055	0	9
Rhoh	0	0.848795	0.657	0.03	0	9
Entpd1	0	0.848192	0.678	0.02	0	9
Dab2	0	0.841271	0.397	0.049	0	9
Tcn2	0	0.840831	0.732	0.075	0	9
Daglb	0	0.840463	0.76	0.246	0	9
Cd33	0	0.838882	0.665	0.013	0	9
Gltp	0	0.83832	0.788	0.184	0	9
Lrrc25	0	0.837046	0.656	0.012	0	9
Tnfrsf13b	0	0.835858	0.659	0.012	0	9
Lyl1	0	0.835828	0.648	0.013	0	9
Gnai2	0	0.835005	0.998	0.951	0	9
Plek	0	0.834253	0.636	0.048	0	9
Nfkbid	0	0.833951	0.545	0.038	0	9
Mef2a	0	0.833407	0.827	0.461	0	9
Hnrnpf	0	0.83276	0.969	0.853	0	9
Zeb2os	0	0.830597	0.685	0.024	0	9
Tpst2	0	0.83047	0.823	0.366	0	9
Pip4k2a	0	0.83016	0.737	0.121	0	9
Susd3	0	0.828441	0.642	0.012	0	9
Skap2	0	0.826765	0.71	0.058	0	9
Abca1	0	0.82674	0.655	0.071	0	9
Ms4a6b	0	0.823308	0.576	0.009	0	9
Twf2	0	0.823301	0.829	0.397	0	9
Mylip	0	0.823254	0.695	0.075	0	9
Hfe	0	0.821551	0.655	0.016	0	9
Ppp1r10	0	0.820754	0.778	0.522	0	9
Rps11	0	0.819894	1	0.993	0	9
Pfn1	0	0.81833	0.997	0.977	0	9
Rcsd1	0	0.816624	0.689	0.023	0	9
Adrb2	0	0.811369	0.516	0.017	0	9
Rhog	0	0.8112	0.732	0.054	0	9
Fcgr2b	0	0.808705	0.516	0.008	0	9
Plxnb2	0	0.808473	0.864	0.431	0	9
Casp8	0	0.807839	0.696	0.02	0	9
Pros1	0	0.807386	0.694	0.042	0	9
Rps4x	0	0.806665	1	0.995	0	9
Gna12	0	0.803995	0.843	0.462	0	9
Nrros	0	0.802539	0.641	0.026	0	9
C3ar1	0	0.802134	0.574	0.011	0	9
Rps10	0	0.801256	1	0.993	0	9
Rnf13	0	0.795426	0.841	0.41	0	9
Rap1a	0	0.79371	0.936	0.692	0	9
Sh3glb1	0	0.791049	0.971	0.824	0	9
Mertk	0	0.790757	0.652	0.027	0	9
Dusp1	1.29201e-115	0.789189	0.639	0.562	4.19297e-111	9
Ikzf1	0	0.788747	0.661	0.02	0	9
Tnfrsf1a	0	0.788028	0.739	0.052	0	9
Sdcbp	0	0.787616	0.96	0.784	0	9
Cd164	0	0.787231	0.777	0.204	0	9
Hck	0	0.786744	0.658	0.025	0	9
Wnk1	0	0.785331	0.918	0.641	0	9
Akap13	0	0.783901	0.759	0.222	0	9
Rps9	0	0.779698	1	0.994	0	9
Tgif1	0	0.777497	0.613	0.024	0	9
Ier2	0	0.775156	0.671	0.307	0	9
Il10rb	0	0.773676	0.649	0.099	0	9
Gng5	0	0.771957	0.981	0.844	0	9
Tpp1	0	0.769346	0.736	0.206	0	9
Gns	0	0.767728	0.786	0.357	0	9
Btg2	0	0.767727	0.667	0.259	0	9
Cxcl10	0	0.766878	0.251	0.01	0	9
Slc11a1	0	0.76319	0.576	0.014	0	9
Blnk	0	0.760512	0.6	0.011	0	9
Gpsm3	0	0.757799	0.655	0.05	0	9
Ldhb	0	0.756536	0.928	0.879	0	9
Il6ra	0	0.755766	0.631	0.011	0	9
Vav1	0	0.755087	0.643	0.01	0	9
Tsc22d4	0	0.753765	0.837	0.336	0	9
Camk1	0	0.7515	0.915	0.737	0	9
Rplp0	0	0.75051	1	0.994	0	9
Ftl1	0	0.750369	1	0.995	0	9
Rplp1	0	0.747823	0.999	0.994	0	9
Sla	0	0.746405	0.625	0.011	0	9
Tifa	0	0.746119	0.594	0.016	0	9
Hes1	0	0.745573	0.537	0.069	0	9
Cd83	0	0.740143	0.546	0.172	0	9
Slc16a6	0	0.737778	0.626	0.038	0	9
Arpc4	0	0.736955	0.945	0.782	0	9
Orai1	0	0.736608	0.69	0.101	0	9
Rgs2	0	0.736175	0.762	0.459	0	9
Pmp22	0	0.734291	0.587	0.095	0	9
Arhgap17	0	0.732955	0.706	0.209	0	9
Eef1d	0	0.732178	0.941	0.778	0	9
Tmem176a	0	0.728953	0.783	0.457	0	9
0610040J01Rik	0	0.728724	0.635	0.021	0	9
Rpl35a	0	0.727069	1	0.995	0	9
Gdf15	0	0.726805	0.255	0.011	0	9
Dusp6	0	0.725969	0.66	0.131	0	9
Tpm3	0	0.725352	0.966	0.855	0	9
Tbxas1	0	0.724603	0.611	0.012	0	9
Rin2	0	0.722759	0.655	0.14	0	9
Selenof	0	0.722448	0.898	0.444	0	9
Rpl27a	0	0.720181	1	0.995	0	9
Rps24	0	0.718372	1	0.997	0	9
Irf5	0	0.717073	0.617	0.011	0	9
Lpl	0	0.715371	0.41	0.033	0	9
Lgals1	1.21121e-88	0.713673	0.258	0.114	3.93075e-84	9
Il10ra	0	0.713336	0.589	0.009	0	9
Ptprc	0	0.712132	0.602	0.01	0	9
Clec4a3	0	0.711705	0.548	0.007	0	9
Ms4a6d	0	0.710054	0.519	0.008	0	9
Cks2	3.5722e-228	0.709637	0.421	0.174	1.15929e-223	9
Pold4	0	0.70555	0.717	0.319	0	9
Marcks	0	0.7046	0.998	0.993	0	9
Tpt1	0	0.70423	1	0.996	0	9
Ptafr	0	0.702653	0.564	0.013	0	9
Jmjd1c	0	0.701924	0.787	0.391	0	9
Birc5	9.10796e-119	0.701491	0.188	0.058	2.95581e-114	9
Fam212a	0	0.700621	0.646	0.084	0	9
Tmem176b	0	0.699786	0.925	0.776	0	9
Edem1	0	0.699566	0.649	0.08	0	9
Tnfaip3	0	0.698525	0.455	0.026	0	9
Man1c1	0	0.692409	0.637	0.063	0	9
Frmd4b	0	0.692352	0.642	0.118	0	9
Tgfbr2	0	0.692325	0.648	0.025	0	9
Slc3a2	0	0.688023	0.865	0.503	0	9
Idh2	0	0.686386	0.898	0.664	0	9
Rps3a1	0	0.682212	1	0.994	0	9
Dhrs3	0	0.680275	0.594	0.033	0	9
Nfkb1	0	0.678452	0.692	0.216	0	9
Syngr1	0	0.675718	0.71	0.447	0	9
Golm1	0	0.675503	0.641	0.132	0	9
Irf1	0	0.673592	0.477	0.051	0	9
Cd84	0	0.672646	0.55	0.007	0	9
Cib1	0	0.670281	0.694	0.149	0	9
Cttnbp2nl	0	0.670131	0.728	0.358	0	9
Slc29a1	0	0.668892	0.632	0.108	0	9
Plin2	4.36229e-289	0.667497	0.528	0.235	1.41569e-284	9
Socs3	0	0.666249	0.537	0.19	0	9
Slc40a1	0	0.666098	0.543	0.041	0	9
Cdk1	0	0.663652	0.338	0.022	0	9
Hhex	0	0.663233	0.564	0.01	0	9
Klf3	0	0.663135	0.65	0.111	0	9
Slc7a8	0	0.661407	0.622	0.128	0	9
Fli1	0	0.660754	0.615	0.055	0	9
Ints6l	0	0.660308	0.632	0.18	0	9
Runx1	0	0.658569	0.553	0.017	0	9
Slc2a5	0	0.658489	0.52	0.034	0	9
Pabpc1	0	0.657944	0.969	0.933	0	9
Cd302	0	0.657335	0.67	0.11	0	9
Gpr183	0	0.657124	0.492	0.006	0	9
Atp6v0e	0	0.656648	0.852	0.423	0	9
Mtdh	0	0.651605	0.937	0.791	0	9
Serf2	0	0.650634	0.991	0.949	0	9
Arhgap5	0	0.650057	0.774	0.489	0	9
Rnaset2a	0	0.649556	0.66	0.153	0	9
Abracl	0	0.648555	0.811	0.418	0	9
Cmtm3	0	0.648313	0.664	0.089	0	9
Phgdh	0	0.648245	0.586	0.106	0	9
Tcirg1	0	0.647899	0.593	0.058	0	9
Cd180	0	0.643271	0.532	0.006	0	9
Lgals9	0	0.642241	0.55	0.012	0	9
Commd8	0	0.641857	0.844	0.621	0	9
Dbi	1.50422e-261	0.641363	0.85	0.71	4.88163e-257	9
Khk	0	0.640411	0.607	0.101	0	9
Snx18	0	0.639018	0.707	0.306	0	9
Snta1	0	0.638229	0.65	0.192	0	9
Itga6	0	0.636735	0.701	0.311	0	9
Egr1	1.44042e-121	0.63646	0.554	0.384	4.67458e-117	9
Cflar	0	0.635771	0.639	0.131	0	9
Xlr	0	0.634408	0.51	0.011	0	9
Rpl18a	0	0.632268	1	0.994	0	9
Il1a	0	0.630611	0.436	0.006	0	9
Actb	0	0.629125	1	0.999	0	9
Tacc1	0	0.628442	0.689	0.308	0	9
Cap1	0	0.626346	0.714	0.357	0	9
Rpl10a	0	0.625243	0.998	0.992	0	9
Prex1	0	0.623801	0.641	0.112	0	9
Nrip1	0	0.623445	0.684	0.309	0	9
Cenpa	5.07435e-239	0.622306	0.25	0.053	1.64678e-234	9
Klf6	7.69145e-222	0.622238	0.794	0.648	2.49611e-217	9
Krcc1	0	0.621001	0.731	0.269	0	9
1700017B05Rik	0	0.620917	0.569	0.045	0	9
Gtf2h2	0	0.616992	0.687	0.279	0	9
Hspa5	0	0.616485	0.954	0.838	0	9
Gm2a	0	0.616019	0.689	0.209	0	9
Ccnd1	0	0.615713	0.53	0.052	0	9
Top2a	0	0.613262	0.196	0.014	0	9
Ppib	0	0.612288	0.969	0.843	0	9
Smagp	0	0.611822	0.455	0.009	0	9
Rpl15	0	0.608332	1	0.994	0	9
Rnaset2b	0	0.607465	0.63	0.147	0	9
Lrp1	0	0.606081	0.847	0.616	0	9
Rpl13	0	0.605529	1	0.998	0	9
Slc29a3	0	0.604845	0.587	0.087	0	9
Vasp	0	0.603654	0.785	0.433	0	9
Prcp	0	0.603031	0.672	0.216	0	9
Dock2	0	0.601686	0.539	0.015	0	9
Tmem243	0	0.597882	0.644	0.16	0	9
Fam49b	0	0.59679	0.94	0.846	0	9
Slc12a2	0	0.593451	0.589	0.214	0	9
Ifnar2	0	0.591768	0.614	0.158	0	9
Tapbp	0	0.59054	0.618	0.165	0	9
Fchsd2	0	0.589459	0.751	0.506	0	9
Rpl39	0	0.588425	0.999	0.993	0	9
Rasgrp3	0	0.588158	0.511	0.013	0	9
Sdf2l1	0	0.586792	0.637	0.302	0	9
Tpd52	0	0.585398	0.723	0.488	0	9
Gdi2	0	0.583983	0.979	0.944	0	9
Rtraf	0	0.582892	0.836	0.428	0	9
Snx17	0	0.581896	0.895	0.71	0	9
Rpsa	0	0.581768	0.999	0.996	0	9
Tor1aip1	0	0.581322	0.664	0.212	0	9
Nek7	0	0.581021	0.623	0.16	0	9
Fes	0	0.58079	0.539	0.038	0	9
Tmed5	0	0.580717	0.736	0.342	0	9
Apobec3	0	0.5803	0.476	0.014	0	9
Ptbp1	0	0.580022	0.719	0.343	0	9
Cebpd	0	0.579811	0.456	0.027	0	9
Dock10	0	0.57977	0.57	0.143	0	9
Dnm2	0	0.579613	0.73	0.368	0	9
Pald1	0	0.578025	0.581	0.072	0	9
Pon2	0	0.576797	0.666	0.174	0	9
Gngt2	0	0.574954	0.504	0.018	0	9
Arrb2	0	0.57492	0.721	0.415	0	9
Lcp2	0	0.5744	0.551	0.051	0	9
Rps27a	0	0.574254	1	0.997	0	9
Ssh2	0	0.574034	0.722	0.482	0	9
Ang	0	0.573969	0.5	0.017	0	9
Rpl21	0	0.571986	0.999	0.994	0	9
Cryl1	0	0.571846	0.564	0.076	0	9
Smap2	0	0.57133	0.841	0.641	0	9
Adam15	0	0.565571	0.636	0.241	0	9
Atox1	0	0.565108	0.952	0.854	0	9
Pkn1	0	0.564654	0.719	0.386	0	9
Lap3	0	0.564311	0.72	0.357	0	9
Gmpr	0	0.564145	0.624	0.257	0	9
Ncoa4	0	0.561343	0.647	0.291	0	9
Dnase2a	0	0.560584	0.509	0.025	0	9
Rsu1	0	0.558312	0.75	0.368	0	9
Ralb	0	0.555821	0.722	0.346	0	9
St6galnac4	0	0.553545	0.625	0.212	0	9
Ms4a6c	0	0.550671	0.311	0.005	0	9
Ptbp3	0	0.550218	0.674	0.273	0	9
Arhgap25	0	0.548364	0.502	0.008	0	9
Ccl9	0	0.547684	0.388	0.006	0	9
Snx6	0	0.547418	0.866	0.717	0	9
Fuca1	0	0.547017	0.753	0.429	0	9
Lacc1	0	0.546905	0.508	0.022	0	9
Fez2	0	0.546088	0.72	0.431	0	9
Numb	0	0.545097	0.528	0.108	0	9
Tnfaip8	0	0.543129	0.558	0.05	0	9
S100a13	0	0.541223	0.569	0.062	0	9
Sqor	0	0.538413	0.488	0.013	0	9
Gpr84	0	0.53827	0.426	0.011	0	9
Mfng	0	0.537527	0.521	0.057	0	9
Reep3	0	0.535561	0.684	0.245	0	9
Renbp	0	0.535208	0.516	0.027	0	9
Dazap2	0	0.535112	0.765	0.424	0	9
Mknk1	0	0.535081	0.569	0.138	0	9
Rel	0	0.534407	0.466	0.027	0	9
Stard3	0	0.533947	0.658	0.254	0	9
Dennd4a	0	0.533928	0.546	0.204	0	9
Cenpx	0	0.533916	0.68	0.346	0	9
Lamtor1	0	0.533339	0.911	0.794	0	9
BC035044	0	0.533276	0.466	0.005	0	9
Capzb	0	0.533087	0.973	0.914	0	9
Arpc3	0	0.532157	0.967	0.904	0	9
Mapkapk2	0	0.530544	0.609	0.227	0	9
Myh9	0	0.530543	0.542	0.08	0	9
Rasal3	0	0.530015	0.463	0.008	0	9
Grk2	0	0.529903	0.678	0.337	0	9
Plod1	0	0.529825	0.531	0.048	0	9
Smad7	0	0.527814	0.523	0.189	0	9
Foxn3	4.84644e-291	0.52714	0.797	0.581	1.57282e-286	9
Abca9	0	0.526485	0.476	0.013	0	9
Ptp4a3	0	0.525514	0.75	0.489	0	9
Rnh1	0	0.523334	0.763	0.441	0	9
Itgb2	0	0.522505	0.474	0.007	0	9
Ophn1	0	0.521146	0.612	0.268	0	9
Adap2	0	0.520478	0.44	0.005	0	9
Acads	0	0.519341	0.664	0.294	0	9
Adcy7	0	0.518664	0.479	0.04	0	9
Hspa1a	8.72424e-65	0.518566	0.288	0.171	2.83128e-60	9
Nfic	0	0.517211	0.602	0.201	0	9
Usp2	0	0.516879	0.507	0.089	0	9
Gsdmd	0	0.51649	0.495	0.019	0	9
Ramp1	0	0.516319	0.485	0.059	0	9
Hsp90b1	5.67088e-304	0.515997	0.96	0.852	1.84037e-299	9
Igf1	0	0.515734	0.301	0.027	0	9
Arhgap31	0	0.514969	0.505	0.074	0	9
Lpcat3	0	0.51438	0.605	0.161	0	9
Erp29	0	0.514262	0.988	0.945	0	9
Rpl23	0	0.513819	1	0.997	0	9
Slc7a7	0	0.511787	0.472	0.03	0	9
Rassf4	0	0.5115	0.477	0.039	0	9
Nrm	0	0.51001	0.512	0.1	0	9
Cdkn1a	9.19193e-160	0.509794	0.419	0.204	2.98306e-155	9
Bach1	0	0.509163	0.573	0.189	0	9
Zfp710	0	0.508769	0.564	0.184	0	9
Srgn	0	0.508701	0.342	0.025	0	9
Mcm3	0	0.506202	0.4	0.014	0	9
Rpl19	0	0.505219	1	0.997	0	9
Dapp1	0	0.503884	0.49	0.018	0	9
Nfam1	0	0.503099	0.477	0.021	0	9
Bhlhe41	0	0.502369	0.497	0.168	0	9
Tspo	0	0.502312	0.48	0.045	0	9
Tmem173	0	0.502163	0.438	0.008	0	9
Selenos	0	0.501864	0.711	0.361	0	9
Cotl1	3.41345e-267	0.501745	0.924	0.847	1.10777e-262	9
Slfn2	0	0.501699	0.344	0.006	0	9
Smox	0	0.501269	0.636	0.231	0	9
Slc25a45	0	0.501061	0.481	0.03	0	9
Elk3	0	0.499901	0.51	0.03	0	9
Csrnp1	0	0.49911	0.448	0.057	0	9
Rasa4	0	0.49877	0.549	0.17	0	9
Bnip2	0	0.498317	0.742	0.397	0	9
Irf2bp2	5.67192e-264	0.498307	0.791	0.56	1.84071e-259	9
Nlrp3	0	0.497428	0.404	0.008	0	9
Adgrg1	3.26789e-179	0.496967	0.727	0.631	1.06053e-174	9
Mgat4a	0	0.49682	0.528	0.17	0	9
Morc3	0	0.495246	0.624	0.309	0	9
Tmem55b	1.04281e-287	0.494898	0.797	0.612	3.38424e-283	9
Fmnl3	0	0.494785	0.496	0.04	0	9
Tob2	0	0.492375	0.59	0.263	0	9
Serp1	2.02133e-281	0.492357	0.722	0.477	6.55983e-277	9
Pdgfb	0	0.492084	0.462	0.119	0	9
Cdk6	0	0.491639	0.457	0.023	0	9
Dcxr	0	0.491146	0.488	0.048	0	9
Cd82	0	0.491065	0.464	0.043	0	9
Rpl12	0	0.490101	0.993	0.976	0	9
Cnpy3	0	0.489556	0.693	0.398	0	9
Mpc1	1.90957e-279	0.489273	0.926	0.81	6.19714e-275	9
Map3k8	0	0.488941	0.421	0.009	0	9
B4galt1	0	0.488551	0.491	0.045	0	9
Rab20	0	0.487312	0.429	0.008	0	9
Cd79b	0	0.487143	0.436	0.006	0	9
Tmed9	0	0.485807	0.924	0.771	0	9
Parvg	0	0.485626	0.438	0.009	0	9
Pacsin2	0	0.485248	0.599	0.213	0	9
Mob1a	0	0.484167	0.551	0.113	0	9
Slc12a9	0	0.484113	0.583	0.253	0	9
Nek6	0	0.483319	0.534	0.12	0	9
Pttg1ip	0	0.483313	0.692	0.343	0	9
Tuba1c	0	0.482522	0.38	0.022	0	9
Sh2b3	0	0.480227	0.521	0.082	0	9
P2rx7	0	0.480199	0.434	0.014	0	9
Sec11c	1.59565e-289	0.478532	0.824	0.606	5.17836e-285	9
Cndp2	4.21679e-298	0.476839	0.615	0.327	1.36848e-293	9
Asph	6.82646e-271	0.47571	0.675	0.42	2.21539e-266	9
Timp2	3.23428e-217	0.474161	0.865	0.632	1.04962e-212	9
Lipa	0	0.474155	0.481	0.17	0	9
Man1a	0	0.474086	0.472	0.074	0	9
Arhgap30	0	0.474025	0.437	0.009	0	9
Adora3	0	0.473874	0.412	0.006	0	9
Aim2	0	0.472337	0.463	0.048	0	9
Il21r	0	0.472099	0.43	0.006	0	9
Rps19	0	0.470703	0.999	0.993	0	9
Snap23	0	0.469841	0.531	0.097	0	9
Skil	2.91446e-199	0.469408	0.732	0.577	9.4583e-195	9
Grap	0	0.469388	0.408	0.007	0	9
Hk3	0	0.469314	0.45	0.026	0	9
Coro1b	0	0.469238	0.694	0.382	0	9
Ccnl1	2.69563e-236	0.468779	0.778	0.61	8.74814e-232	9
Rpl28	0	0.465409	0.997	0.992	0	9
Ptpn1	7.24555e-258	0.464875	0.834	0.687	2.3514e-253	9
Nmt1	6.69215e-280	0.463375	0.744	0.526	2.1718e-275	9
Elf1	0	0.462935	0.51	0.096	0	9
Rps21	0	0.462898	0.998	0.99	0	9
Tmem63a	0	0.462471	0.436	0.01	0	9
Rpl18	0	0.460936	1	0.995	0	9
Herpud1	7.29854e-232	0.460376	0.679	0.465	2.3686e-227	9
Acox3	0	0.459768	0.47	0.124	0	9
Ski	6.69223e-288	0.459199	0.661	0.401	2.17183e-283	9
Emp3	0	0.458659	0.42	0.087	0	9
Rcbtb2	1.1521e-275	0.458492	0.678	0.418	3.7389e-271	9
Myo1f	0	0.457897	0.44	0.007	0	9
Itgb1	3.84931e-296	0.457556	0.831	0.628	1.24922e-291	9
Rps15a	0	0.457487	1	0.992	0	9
Bcl10	0	0.457104	0.69	0.41	0	9
Clec5a	0	0.454209	0.418	0.005	0	9
Adam17	0	0.453947	0.522	0.116	0	9
Psmb9	0	0.453657	0.424	0.013	0	9
Rps16	0	0.45363	0.999	0.991	0	9
Nfkbiz	0	0.453569	0.367	0.071	0	9
Tns3	0	0.451821	0.5	0.085	0	9
Glmp	0	0.451556	0.594	0.215	0	9
Ctc1	0	0.451224	0.61	0.304	0	9
Tram1	0	0.451078	0.681	0.386	0	9
Rps3	0	0.450995	1	0.995	0	9
Tex261	0	0.450621	0.702	0.426	0	9
Mcfd2	5.81975e-292	0.450419	0.687	0.401	1.88868e-287	9
Hist1h2ap	8.16473e-57	0.450088	0.145	0.059	2.6497e-52	9
Elmo1	1.71342e-238	0.449821	0.695	0.45	5.56055e-234	9
Dock8	0	0.449798	0.437	0.008	0	9
Btg1	2.92765e-205	0.449315	0.875	0.766	9.50109e-201	9
Csf3r	0	0.449132	0.412	0.01	0	9
Gng12	0	0.44802	0.531	0.102	0	9
Fos	2.5174e-46	0.44742	0.713	0.591	8.16973e-42	9
Taldo1	9.64083e-286	0.446589	0.92	0.83	3.12874e-281	9
Samsn1	0	0.446487	0.404	0.006	0	9
Dock4	0	0.443949	0.522	0.192	0	9
Crlf3	0	0.443815	0.549	0.207	0	9
Lims1	7.37431e-285	0.443746	0.703	0.45	2.39318e-280	9
Cdkn2c	0	0.442695	0.245	0.009	0	9
Taf6l	0	0.442447	0.643	0.341	0	9
Comt	5.22073e-277	0.441755	0.888	0.773	1.69428e-272	9
Rtn4rl1	0	0.441685	0.454	0.106	0	9
Fam46a	8.98272e-209	0.441492	0.583	0.31	2.91516e-204	9
Il4ra	0	0.441365	0.394	0.032	0	9
Ifi27	0	0.441197	0.508	0.158	0	9
Arpc2	0	0.440975	0.982	0.952	0	9
Klf10	0	0.440943	0.428	0.076	0	9
Ivns1abp	3.53722e-223	0.440797	0.842	0.713	1.14794e-218	9
Sdc4	0	0.439434	0.382	0.039	0	9
Serpinf1	0	0.439204	0.443	0.069	0	9
Nagpa	0	0.438957	0.452	0.052	0	9
Acap2	0	0.438463	0.533	0.157	0	9
Wls	0	0.438455	0.499	0.072	0	9
Rab5c	4.72772e-276	0.436849	0.844	0.72	1.53429e-271	9
Ssr4	1.51552e-298	0.436498	0.955	0.857	4.91833e-294	9
Dap	0	0.43615	0.619	0.272	0	9
Mfsd1	0	0.435547	0.515	0.161	0	9
Dek	1.41549e-138	0.435152	0.707	0.62	4.59368e-134	9
Hvcn1	0	0.435103	0.416	0.012	0	9
Osgep	5.22852e-269	0.434646	0.732	0.519	1.69681e-264	9
Aagab	1.7637e-270	0.434281	0.584	0.312	5.72372e-266	9
Mgat1	4.58383e-274	0.434068	0.618	0.345	1.48759e-269	9
Traf3ip3	0	0.433963	0.418	0.041	0	9
Oaf	0	0.432808	0.421	0.04	0	9
Tmem37	0	0.432601	0.426	0.017	0	9
Zc3hav1	0	0.432542	0.417	0.012	0	9
Cln8	3.37607e-289	0.432004	0.528	0.241	1.09564e-284	9
Slc15a3	0	0.431816	0.393	0.018	0	9
Fmnl1	0	0.431403	0.456	0.096	0	9
Ost4	9.07026e-267	0.431124	0.846	0.661	2.94357e-262	9
Snx3	7.06935e-268	0.430866	0.93	0.832	2.29422e-263	9
Rp2	0	0.430856	0.481	0.105	0	9
Frmd4a	5.22853e-183	0.430406	0.773	0.623	1.69682e-178	9
Cltc	2.81211e-237	0.430255	0.911	0.791	9.12614e-233	9
Slc9a9	0	0.429958	0.427	0.094	0	9
Wsb1	7.4085e-182	0.429621	0.894	0.858	2.40428e-177	9
Fam102b	8.72316e-194	0.428829	0.593	0.379	2.83093e-189	9
Rpl9	0	0.428312	1	0.996	0	9
Retreg1	5.37006e-254	0.428125	0.629	0.337	1.74275e-249	9
Lsp1	0	0.427331	0.369	0.034	0	9
Ubl3	3.83e-246	0.425863	0.809	0.629	1.24295e-241	9
Sft2d2	0	0.425447	0.465	0.083	0	9
Edem2	5.02781e-301	0.42522	0.603	0.304	1.63167e-296	9
Pxn	0	0.423163	0.509	0.116	0	9
Bcap31	3.54854e-269	0.422885	0.805	0.613	1.15161e-264	9
Syk	0	0.421373	0.418	0.012	0	9
Fbxw4	1.28093e-286	0.42072	0.539	0.254	4.15701e-282	9
C5ar1	0	0.420533	0.285	0.004	0	9
Gm13889	3.20407e-47	0.419096	0.364	0.253	1.03982e-42	9
Wipf1	0	0.418815	0.445	0.047	0	9
Sash3	0	0.41833	0.402	0.005	0	9
Rac1	0	0.417146	0.953	0.894	0	9
Ccl6	0	0.415911	0.314	0.004	0	9
Cd48	0	0.415063	0.347	0.004	0	9
Il16	0	0.414211	0.382	0.007	0	9
Cd74	0	0.413777	0.315	0.019	0	9
Scarb2	1.84214e-199	0.413643	0.731	0.596	5.9783e-195	9
Prkab1	0	0.412537	0.533	0.204	0	9
Rnpep	2.19541e-227	0.412007	0.693	0.485	7.12476e-223	9
Akr1b10	0	0.411982	0.429	0.034	0	9
Fam91a1	3.83804e-280	0.411327	0.522	0.237	1.24556e-275	9
Tlr7	0	0.411084	0.4	0.005	0	9
Plcl2	0	0.41107	0.477	0.172	0	9
Card19	6.45773e-297	0.40982	0.584	0.285	2.09573e-292	9
Magt1	0	0.409571	0.488	0.143	0	9
Mfsd11	5.35061e-188	0.409028	0.602	0.396	1.73643e-183	9
Tnfrsf1b	0	0.408514	0.403	0.014	0	9
Rbm3	4.65158e-284	0.407725	0.985	0.964	1.50958e-279	9
Gbp7	0	0.407069	0.355	0.015	0	9
Cdk9	4.01145e-240	0.406629	0.726	0.52	1.30184e-235	9
Mob3c	0	0.406293	0.403	0.057	0	9
Ncln	1.04415e-293	0.4062	0.604	0.306	3.38857e-289	9
Hsd17b4	2.95884e-274	0.405471	0.591	0.308	9.60232e-270	9
Nsa2	5.12702e-226	0.405309	0.873	0.796	1.66387e-221	9
Wdr1	7.0524e-233	0.405096	0.81	0.665	2.28872e-228	9
Smc4	8.9666e-71	0.402977	0.258	0.138	2.90993e-66	9
Naaa	0	0.402762	0.428	0.111	0	9
Hprt	1.83598e-185	0.402128	0.829	0.649	5.95831e-181	9
Zbtb7a	1.04959e-216	0.401975	0.605	0.364	3.40623e-212	9
Rpl7	0	0.401153	0.999	0.99	0	9
Ankrd44	1.0873e-242	0.400593	0.535	0.267	3.52862e-238	9
Prdx1	2.43331e-173	0.400115	0.955	0.917	7.89684e-169	9
Stat3	2.04727e-239	0.399569	0.544	0.273	6.64401e-235	9
Plod3	2.32697e-265	0.398875	0.52	0.238	7.5517e-261	9
Uap1l1	0	0.398725	0.373	0.048	0	9
Cdca8	2.89819e-80	0.396736	0.187	0.076	9.40548e-76	9
Plcg2	0	0.395767	0.394	0.023	0	9
Pik3cg	0	0.395272	0.396	0.006	0	9
Dusp7	0	0.394809	0.474	0.162	0	9
Gm42418	2.8108e-193	0.394354	0.948	0.689	9.12188e-189	9
Pnpla7	0	0.394219	0.376	0.027	0	9
Marc2	2.25049e-269	0.394138	0.699	0.438	7.30352e-265	9
Rpn2	1.35354e-215	0.393921	0.857	0.742	4.39264e-211	9
Hacd4	0	0.393596	0.351	0.021	0	9
Eva1b	0	0.392671	0.383	0.046	0	9
Cenpf	1.32075e-144	0.391794	0.165	0.036	4.28623e-140	9
Fcho2	9.13835e-293	0.391384	0.505	0.208	2.96567e-288	9
Rgs1	0	0.391187	0.162	0.004	0	9
Nde1	0	0.390935	0.372	0.045	0	9
Abcc3	0	0.390726	0.376	0.012	0	9
Tspan14	3.05272e-305	0.390692	0.542	0.218	9.90699e-301	9
Ppp1r12c	2.03617e-234	0.390678	0.622	0.376	6.60799e-230	9
Tcf4	1.79393e-250	0.389646	0.807	0.545	5.82185e-246	9
Rgl1	0	0.389508	0.434	0.091	0	9
Kcnk13	0	0.389481	0.455	0.148	0	9
Rtf2	4.71626e-244	0.389014	0.563	0.299	1.53057e-239	9
Tifab	0	0.389001	0.366	0.005	0	9
Tubgcp5	5.95548e-247	0.388584	0.495	0.226	1.93273e-242	9
Chst7	0	0.388494	0.376	0.049	0	9
Hist1h1c	5.48813e-228	0.387878	0.24	0.049	1.78106e-223	9
Gnpda1	4.14973e-245	0.38768	0.452	0.193	1.34671e-240	9
Hspa1b	3.563e-94	0.387592	0.183	0.064	1.1563e-89	9
Ubtd1	0	0.387534	0.495	0.149	0	9
Rapgef5	4.88247e-226	0.387097	0.421	0.178	1.58451e-221	9
Rassf2	0	0.386712	0.469	0.101	0	9
Mknk2	2.6311e-298	0.38597	0.54	0.232	8.5387e-294	9
Ifi27l2a	3.79815e-74	0.385833	0.192	0.081	1.23261e-69	9
Il11ra1	0	0.385758	0.516	0.161	0	9
Hexim1	3.81617e-143	0.385603	0.478	0.284	1.23846e-138	9
Irf2	2.86175e-279	0.385132	0.493	0.206	9.28723e-275	9
Ppcdc	5.28985e-274	0.384897	0.469	0.189	1.71672e-269	9
Adipor1	1.72207e-182	0.382593	0.751	0.612	5.58863e-178	9
Npepl1	0	0.382549	0.558	0.229	0	9
Spint1	0	0.382185	0.318	0.011	0	9
BC017643	5.58604e-259	0.382099	0.533	0.252	1.81284e-254	9
Sertad1	0	0.381839	0.375	0.059	0	9
Asb2	0	0.381591	0.347	0.015	0	9
Atp6v0a2	9.73832e-279	0.380811	0.48	0.193	3.16038e-274	9
Pdia3	5.70514e-180	0.380364	0.934	0.872	1.85149e-175	9
Cerk	4.01723e-268	0.380216	0.514	0.23	1.30371e-263	9
Sem1	2.16449e-171	0.379952	0.852	0.438	7.02443e-167	9
Pdia6	1.94326e-144	0.379812	0.867	0.785	6.30645e-140	9
Gmip	2.01942e-221	0.379408	0.526	0.277	6.55361e-217	9
H2-T23	0	0.379127	0.365	0.041	0	9
Baz1a	0	0.378873	0.402	0.045	0	9
Ccna2	2.30447e-175	0.378722	0.162	0.028	7.4787e-171	9
Lactb	2.14339e-269	0.378655	0.487	0.205	6.95595e-265	9
Nrp1	1.85891e-210	0.378372	0.562	0.287	6.03271e-206	9
Dnajc3	1.01645e-219	0.378045	0.562	0.31	3.29867e-215	9
Hmox2	4.39777e-215	0.377984	0.804	0.658	1.42721e-210	9
Rest	0	0.377903	0.397	0.044	0	9
Rhoc	3.83244e-234	0.377064	0.446	0.177	1.24374e-229	9
Naglu	0	0.377047	0.426	0.107	0	9
Rab8b	4.92673e-286	0.377029	0.503	0.208	1.59887e-281	9
Stard8	0	0.376891	0.356	0.012	0	9
Mtus1	9.63323e-201	0.376007	0.566	0.333	3.12627e-196	9
Etv5	0	0.375868	0.439	0.102	0	9
Ptpa	2.23559e-206	0.375753	0.604	0.346	7.25515e-202	9
Tmem109	7.24921e-224	0.375671	0.539	0.291	2.35259e-219	9
Erbin	0	0.37536	0.442	0.145	0	9
Rrm2	5.12731e-87	0.375112	0.162	0.054	1.66397e-82	9
Hmg20b	0	0.374962	0.544	0.211	0	9
9930111J21Rik2	0	0.37491	0.353	0.003	0	9
Etfb	8.60692e-224	0.374834	0.788	0.629	2.7932e-219	9
Slc39a1	1.06352e-266	0.374821	0.505	0.215	3.45144e-262	9
Hbp1	0	0.374413	0.504	0.181	0	9
Bank1	0	0.374	0.336	0.003	0	9
Il6st	7.82618e-228	0.373575	0.476	0.218	2.53983e-223	9
Scp2	1.24823e-235	0.372898	0.882	0.796	4.05089e-231	9
Nav3	5.7963e-67	0.372753	0.533	0.46	1.88107e-62	9
Sypl	1.20158e-263	0.372525	0.55	0.265	3.89948e-259	9
Apoc1	1.49652e-304	0.372198	0.188	0.016	4.85664e-300	9
Rpl11	0	0.371414	1	0.996	0	9
Rapsn	0	0.370826	0.341	0.029	0	9
Mki67	4.53617e-168	0.369642	0.168	0.031	1.47212e-163	9
Tmem50a	1.73491e-212	0.369409	0.938	0.871	5.6303e-208	9
Dok1	0	0.368906	0.374	0.011	0	9
Gm26532	0	0.368654	0.263	0.023	0	9
Itpripl1	0	0.367915	0.391	0.06	0	9
Scaf11	6.33453e-186	0.367735	0.65	0.456	2.05574e-181	9
Gna13	1.65521e-208	0.367597	0.634	0.413	5.37166e-204	9
Slc25a5	0	0.367518	0.985	0.904	0	9
Cdc20	8.17278e-176	0.367476	0.15	0.022	2.65231e-171	9
Trp53	6.71056e-194	0.367367	0.678	0.478	2.17778e-189	9
Epn1	7.884e-198	0.36639	0.895	0.837	2.55859e-193	9
Tmed3	9.42485e-197	0.366027	0.76	0.566	3.05865e-192	9
Rps6ka4	0	0.365815	0.428	0.098	0	9
Mcrip1	5.18143e-204	0.365812	0.734	0.406	1.68153e-199	9
Specc1	1.95092e-302	0.365466	0.452	0.151	6.33131e-298	9
Ifitm3	6.37837e-237	0.365239	0.178	0.022	2.06997e-232	9
Myd88	0	0.363879	0.37	0.03	0	9
A630001G21Rik	0	0.363608	0.354	0.007	0	9
Ifngr2	1.7194e-172	0.363371	0.709	0.533	5.57997e-168	9
Rragc	4.02713e-163	0.363188	0.671	0.515	1.30692e-158	9
Sdf4	3.56508e-202	0.363074	0.797	0.652	1.15698e-197	9
Pepd	1.78216e-187	0.362225	0.599	0.393	5.78365e-183	9
Ppp1r14b	6.86153e-185	0.362075	0.924	0.872	2.22677e-180	9
Trim8	1.29341e-168	0.361782	0.689	0.518	4.1975e-164	9
Ebi3	4.75275e-250	0.361618	0.421	0.164	1.54241e-245	9
Sgpl1	9.57516e-258	0.3614	0.478	0.2	3.10743e-253	9
Nfia	0	0.36132	0.493	0.116	0	9
Rpl3	0	0.361289	1	0.996	0	9
Usf2	2.54758e-195	0.361145	0.783	0.637	8.26768e-191	9
1810011H11Rik	0	0.361061	0.341	0.005	0	9
Cln3	4.15047e-275	0.360973	0.463	0.176	1.34695e-270	9
Mgll	7.24468e-240	0.3604	0.438	0.176	2.35112e-235	9
Pkig	2.58733e-173	0.360168	0.861	0.755	8.39667e-169	9
Suclg2	0	0.358902	0.456	0.107	0	9
1810037I17Rik	6.20985e-166	0.35844	0.801	0.709	2.01528e-161	9
Smc2	4.33807e-26	0.358184	0.323	0.269	1.40783e-21	9
Ifitm2	4.0639e-38	0.358085	0.267	0.171	1.31886e-33	9
Slc46a3	0	0.358072	0.345	0.014	0	9
Zcchc6	3.3434e-172	0.358044	0.498	0.282	1.08503e-167	9
Gem	2.57675e-83	0.357991	0.421	0.261	8.36232e-79	9
Npc1	6.57246e-253	0.357975	0.459	0.187	2.13296e-248	9
Rnaseh2c	1.43746e-183	0.357962	0.684	0.523	4.665e-179	9
Kansl1l	8.47253e-277	0.357832	0.427	0.145	2.74959e-272	9
Tspan4	1.17513e-170	0.357572	0.573	0.372	3.81366e-166	9
Ets1	0	0.357488	0.361	0.022	0	9
Epsti1	0	0.356406	0.333	0.012	0	9
Pbk	0	0.356361	0.15	0.006	0	9
Btk	0	0.356324	0.362	0.005	0	9
Frmd8	0	0.356058	0.41	0.047	0	9
Pmaip1	0	0.355831	0.29	0.006	0	9
Nucb1	3.76497e-199	0.355544	0.649	0.442	1.22185e-194	9
Akr1b3	6.62996e-176	0.355218	0.741	0.596	2.15162e-171	9
Ccr1	0	0.355137	0.167	0.003	0	9
Lat2	0	0.353994	0.314	0.027	0	9
Galnt12	0	0.353935	0.332	0.015	0	9
Ptp4a2	6.14092e-188	0.352685	0.89	0.818	1.99291e-183	9
Mapk14	3.85007e-196	0.352374	0.586	0.36	1.24946e-191	9
Arap1	0	0.352188	0.414	0.07	0	9
Rgs19	6.19971e-173	0.352164	0.66	0.485	2.01199e-168	9
Eng	0	0.351277	0.343	0.016	0	9
Prdx4	3.84304e-73	0.351078	0.541	0.451	1.24718e-68	9
Trim47	0	0.350786	0.361	0.02	0	9
Rps2	0	0.350637	1	0.997	0	9
Naga	0	0.350494	0.408	0.104	0	9
Pag1	1.63289e-268	0.350276	0.411	0.139	5.29923e-264	9
Tmem144	0	0.350146	0.34	0.021	0	9
Cd2ap	6.99649e-234	0.350054	0.522	0.255	2.27057e-229	9
Dip2b	2.58888e-176	0.349766	0.594	0.392	8.40169e-172	9
Elovl1	0	0.349312	0.463	0.136	0	9
Gmpr2	1.46619e-246	0.348823	0.519	0.246	4.75822e-242	9
Smarcd2	0	0.348722	0.45	0.101	0	9
Usp8	4.7469e-186	0.348712	0.539	0.318	1.54051e-181	9
Swap70	0	0.347575	0.354	0.029	0	9
Gpr137b	1.74188e-293	0.34739	0.429	0.141	5.65293e-289	9
Ppt1	1.07671e-158	0.347229	0.671	0.519	3.49425e-154	9
Rassf5	0	0.347016	0.392	0.117	0	9
Klhl6	0	0.346344	0.341	0.004	0	9
BC028528	0	0.345734	0.372	0.019	0	9
Plbd2	9.13925e-226	0.345653	0.509	0.253	2.96596e-221	9
Neurl3	0	0.345354	0.283	0.015	0	9
Ccnb2	3.69553e-99	0.345207	0.175	0.057	1.19931e-94	9
Git2	1.66144e-156	0.345131	0.545	0.342	5.39188e-152	9
Arl5c	0	0.345001	0.292	0.039	0	9
Sun2	0	0.344706	0.405	0.105	0	9
Sirt2	8.59589e-168	0.344588	0.813	0.711	2.78962e-163	9
Fam174a	2.75086e-205	0.344252	0.687	0.423	8.92736e-201	9
Ptprj	4.00206e-251	0.343858	0.416	0.157	1.29879e-246	9
Pdcd6ip	5.46999e-192	0.343724	0.593	0.374	1.77518e-187	9
Crlf2	1.79506e-110	0.343535	0.442	0.288	5.82551e-106	9
Snx20	0	0.343396	0.357	0.022	0	9
Tap2	0	0.342666	0.355	0.023	0	9
Mcur1	2.43482e-303	0.342499	0.436	0.141	7.90171e-299	9
Eif4ebp1	0	0.342046	0.407	0.11	0	9
Ptpre	1.99754e-241	0.341711	0.423	0.163	6.48263e-237	9
Stxbp3	0	0.341088	0.414	0.106	0	9
Acer3	3.37837e-238	0.340738	0.434	0.177	1.09638e-233	9
Rap1gds1	2.43484e-160	0.34045	0.615	0.419	7.90179e-156	9
Col27a1	0	0.340394	0.336	0.025	0	9
Aup1	2.54571e-191	0.340369	0.558	0.332	8.26161e-187	9
Gm38843	0	0.339824	0.324	0.005	0	9
Rab32	0	0.339471	0.336	0.012	0	9
Tgif2	0	0.339191	0.361	0.026	0	9
Lrp10	4.08335e-245	0.338984	0.521	0.238	1.32517e-240	9
Sppl2a	4.41741e-213	0.338791	0.449	0.202	1.43358e-208	9
Fbrsl1	8.9637e-115	0.338631	0.662	0.55	2.90899e-110	9
Snn	3.13824e-119	0.338613	0.708	0.568	1.01845e-114	9
Cstb	4.48262e-68	0.338263	0.644	0.594	1.45475e-63	9
Laptm4a	2.68742e-226	0.33805	0.965	0.913	8.72148e-222	9
Ppp6r1	1.6048e-175	0.338024	0.522	0.31	5.20804e-171	9
Man2b2	0	0.337786	0.372	0.062	0	9
Rpl6	0	0.337747	1	0.996	0	9
Anxa6	0	0.337065	0.442	0.114	0	9
Actr2	5.73539e-162	0.33687	0.863	0.784	1.86131e-157	9
Ncf4	0	0.336857	0.341	0.008	0	9
Sord	2.30417e-269	0.336625	0.443	0.168	7.47773e-265	9
Tep1	0	0.336447	0.348	0.034	0	9
Colgalt1	4.9222e-150	0.335593	0.618	0.452	1.5974e-145	9
Tgfbi	0	0.335549	0.22	0.012	0	9
Arhgef1	1.68902e-209	0.335441	0.503	0.254	5.48139e-205	9
Aldh2	5.13192e-77	0.335221	0.612	0.52	1.66546e-72	9
Itpr2	0	0.335161	0.361	0.054	0	9
Tmem59	4.96042e-194	0.335135	0.971	0.913	1.60981e-189	9
Sf3b1	4.59558e-180	0.334884	0.92	0.856	1.4914e-175	9
Man1a2	1.76048e-142	0.334592	0.666	0.499	5.71327e-138	9
Nckap5l	1.40458e-163	0.332821	0.416	0.21	4.55827e-159	9
Vwa5a	0	0.332001	0.37	0.065	0	9
M6pr	5.03215e-153	0.331907	0.64	0.468	1.63308e-148	9
Ccnb1	5.78408e-200	0.33174	0.144	0.016	1.87711e-195	9
Jak1	1.60067e-164	0.331603	0.671	0.48	5.19464e-160	9
Il13ra1	0	0.33136	0.363	0.081	0	9
Osbpl11	2.86095e-197	0.330184	0.462	0.224	9.28465e-193	9
Rreb1	0	0.32964	0.372	0.073	0	9
Utp11	3.06937e-181	0.329591	0.481	0.264	9.96102e-177	9
Fam111a	0	0.329066	0.342	0.072	0	9
H2-Q4	0	0.328369	0.316	0.029	0	9
Sh3gl1	6.01946e-153	0.328335	0.575	0.385	1.95349e-148	9
Slc38a2	3.92184e-106	0.32771	0.848	0.765	1.27276e-101	9
Slc15a4	1.52928e-211	0.326097	0.431	0.19	4.96298e-207	9
Iscu	2.65727e-157	0.326082	0.822	0.71	8.62362e-153	9
Rab31	1.46554e-274	0.325658	0.465	0.173	4.75611e-270	9
Arhgap4	0	0.325062	0.317	0.019	0	9
Cryzl2	0	0.324883	0.349	0.025	0	9
Hat1	6.09323e-154	0.323924	0.449	0.246	1.97744e-149	9
Rps27	2.19319e-281	0.322413	0.999	0.993	7.11756e-277	9
Rela	0	0.322	0.442	0.13	0	9
Smim15	1.26613e-178	0.321896	0.558	0.343	4.10897e-174	9
Clk1	3.47692e-117	0.321667	0.76	0.682	1.12836e-112	9
Lgals3bp	0	0.321395	0.311	0.055	0	9
Slc9a3r1	0	0.321341	0.481	0.079	0	9
Dok3	0	0.321208	0.33	0.053	0	9
Ech1	3.22844e-159	0.321153	0.711	0.546	1.04773e-154	9
Lpar6	0	0.320847	0.304	0.054	0	9
Mia2	8.39646e-158	0.320746	0.476	0.271	2.7249e-153	9
Tab2	1.76815e-152	0.320467	0.659	0.489	5.73817e-148	9
Gspt1	1.21393e-136	0.320144	0.644	0.504	3.93955e-132	9
Ggh	7.06322e-173	0.320098	0.599	0.39	2.29223e-168	9
Crat	6.72064e-225	0.319652	0.456	0.199	2.18105e-220	9
Pnpla2	6.52995e-262	0.319397	0.402	0.138	2.11916e-257	9
Rpl34	8.45021e-303	0.319221	0.999	0.991	2.74235e-298	9
Tm9sf3	4.18197e-147	0.318899	0.802	0.703	1.35717e-142	9
Vps18	1.46057e-211	0.318685	0.417	0.177	4.73998e-207	9
Sowahc	2.38906e-157	0.318592	0.406	0.204	7.75323e-153	9
Fkbp15	8.40085e-244	0.318487	0.401	0.147	2.72633e-239	9
Wapl	2.43409e-156	0.318269	0.586	0.397	7.89935e-152	9
P2rx4	4.61613e-171	0.318135	0.351	0.143	1.49807e-166	9
Lman2	3.0514e-147	0.317906	0.602	0.425	9.9027e-143	9
Atp6ap2	7.21446e-107	0.317866	0.863	0.775	2.34131e-102	9
Ctso	3.47016e-304	0.317676	0.408	0.12	1.12617e-299	9
Abhd6	2.15679e-194	0.317255	0.46	0.228	6.99944e-190	9
Ebp	8.94186e-187	0.317162	0.532	0.301	2.9019e-182	9
Gm5086	0	0.317045	0.299	0.006	0	9
Wdfy2	1.32052e-275	0.316946	0.351	0.101	4.2855e-271	9
Tfe3	1.49219e-178	0.316908	0.477	0.251	4.8426e-174	9
Abl1	6.75277e-185	0.316076	0.505	0.269	2.19148e-180	9
Igsf6	0	0.315897	0.289	0.004	0	9
Nusap1	1.06176e-217	0.315793	0.145	0.014	3.44573e-213	9
Mest	4.41655e-213	0.315791	0.116	0.509	1.4333e-208	9
Slc50a1	2.07842e-206	0.315488	0.506	0.254	6.74508e-202	9
Cxxc5	3.21988e-172	0.315062	0.729	0.48	1.04495e-167	9
Stk10	0	0.314554	0.32	0.019	0	9
Cdc42	3.92117e-274	0.314494	0.994	0.984	1.27254e-269	9
Klf4	4.07998e-96	0.314289	0.342	0.176	1.32408e-91	9
Gadd45g	2.37264e-32	0.314279	0.502	0.434	7.69992e-28	9
Rsrp1	1.92745e-27	0.314008	0.944	0.976	6.25517e-23	9
Alas1	1.40724e-163	0.313383	0.466	0.256	4.56692e-159	9
Arhgap27	0	0.313359	0.311	0.05	0	9
Senp2	5.49515e-123	0.313357	0.572	0.414	1.78334e-118	9
Vamp3	1.33689e-151	0.313351	0.626	0.436	4.3386e-147	9
Hps3	0	0.312999	0.341	0.08	0	9
Slc44a2	4.69302e-182	0.312538	0.457	0.229	1.52303e-177	9
Agpat3	4.96455e-167	0.312077	0.634	0.439	1.61115e-162	9
Tmem14c	1.73993e-171	0.311319	0.884	0.8	5.6466e-167	9
Hist1h2bc	1.05411e-178	0.311219	0.31	0.1	3.42091e-174	9
Ormdl2	1.82088e-298	0.311196	0.457	0.155	5.90931e-294	9
Rbm47	0	0.311117	0.286	0.007	0	9
Cdca3	6.71384e-157	0.311094	0.159	0.03	2.17884e-152	9
Vkorc1	4.5608e-160	0.309758	0.593	0.4	1.48012e-155	9
Oser1	4.21272e-123	0.309523	0.612	0.465	1.36716e-118	9
Stx4a	2.98959e-203	0.308821	0.497	0.249	9.7021e-199	9
Nr3c1	1.2601e-190	0.30828	0.517	0.26	4.08939e-186	9
Eef2k	2.02168e-161	0.307992	0.457	0.246	6.56094e-157	9
Leprot	2.28806e-132	0.307384	0.743	0.623	7.42546e-128	9
Gpr155	2.64993e-275	0.307237	0.352	0.1	8.59981e-271	9
Vrk1	6.89917e-211	0.307048	0.426	0.18	2.23899e-206	9
AC149090.1	1.00821e-132	0.306713	0.59	0.357	3.27193e-128	9
Wdr26	5.88477e-127	0.306708	0.779	0.687	1.90978e-122	9
Stk17b	0	0.306322	0.297	0.031	0	9
Srsf2	8.11971e-114	0.306229	0.971	0.974	2.63509e-109	9
Cdc42se1	4.61323e-197	0.305608	0.526	0.27	1.49713e-192	9
Washc4	9.33015e-190	0.305514	0.387	0.168	3.02791e-185	9
Mcm5	2.99648e-280	0.305029	0.256	0.045	9.72448e-276	9
Arhgef6	0	0.304544	0.338	0.039	0	9
Syf2	9.16473e-142	0.304245	0.713	0.583	2.97423e-137	9
Jak3	0	0.303869	0.317	0.033	0	9
Slc35b2	1.85903e-179	0.30386	0.521	0.293	6.03312e-175	9
H2-DMb1	0	0.30371	0.294	0.009	0	9
Rilpl2	6.37548e-61	0.302883	0.454	0.353	2.06903e-56	9
Arl11	0	0.302821	0.286	0.003	0	9
Ccrl2	0	0.302746	0.19	0.005	0	9
Milr1	0	0.302601	0.283	0.021	0	9
Was	0	0.302256	0.311	0.004	0	9
Rpl8	1.08251e-286	0.301912	0.999	0.995	3.51307e-282	9
Casp1	0	0.30176	0.301	0.011	0	9
Vgll4	3.3184e-212	0.301231	0.427	0.168	1.07692e-207	9
Fam110a	1.44607e-94	0.301158	0.461	0.316	4.69293e-90	9
Ss18	3.73918e-219	0.301037	0.494	0.224	1.21348e-214	9
Mlxipl	0	0.300469	0.286	0.007	0	9
Zfp703	3.47961e-231	0.300082	0.396	0.143	1.12924e-226	9
Orai3	5.13779e-229	0.300076	0.422	0.167	1.66737e-224	9
Trim30a	0	0.299841	0.281	0.004	0	9
Prc1	1.51911e-103	0.299636	0.144	0.038	4.92996e-99	9
B4galt4	3.62752e-188	0.299201	0.413	0.182	1.17724e-183	9
Map2k3	2.20345e-277	0.299063	0.404	0.13	7.15086e-273	9
Atf1	7.99228e-250	0.29899	0.454	0.179	2.59373e-245	9
Otulin	1.44157e-181	0.298933	0.476	0.25	4.67834e-177	9
Topors	5.11239e-103	0.29883	0.526	0.378	1.65912e-98	9
Cnn2	1.83468e-117	0.29879	0.149	0.034	5.95407e-113	9
Pcna	2.70906e-77	0.298383	0.442	0.32	8.79171e-73	9
Card9	0	0.298298	0.309	0.015	0	9
Acss1	0	0.298168	0.35	0.044	0	9
Hgsnat	1.11944e-40	0.297891	0.275	0.183	3.63291e-36	9
Ggta1	0	0.297817	0.317	0.024	0	9
Arl4c	6.44978e-38	0.297476	0.739	0.784	2.09315e-33	9
Chd9	1.02111e-93	0.297475	0.632	0.516	3.31382e-89	9
Spc25	9.61275e-251	0.297324	0.171	0.018	3.11963e-246	9
Aurkb	0	0.296452	0.167	0.006	0	9
Tipin	9.46905e-39	0.296209	0.4	0.337	3.07299e-34	9
Bcl2l11	0	0.295241	0.327	0.038	0	9
0610010K14Rik	5.95182e-123	0.294858	0.69	0.58	1.93154e-118	9
Spc24	5.80697e-180	0.294854	0.18	0.034	1.88454e-175	9
Notch2	0	0.2946	0.342	0.047	0	9
Cmklr1	0	0.29425	0.282	0.006	0	9
Bcl2l12	0	0.294069	0.34	0.032	0	9
Ctdsp1	0	0.293974	0.37	0.056	0	9
Rpl7a	2.7422e-227	0.293609	0.992	0.988	8.89925e-223	9
Lrmp	0	0.292492	0.301	0.014	0	9
Stat6	0	0.292296	0.311	0.016	0	9
Plin3	0	0.291877	0.359	0.069	0	9
Asap1	9.25091e-129	0.291492	0.602	0.425	3.0022e-124	9
Tnfrsf17	0	0.290889	0.265	0.003	0	9
Serpinh1	1.9908e-35	0.290811	0.121	0.255	6.46074e-31	9
Nuak1	4.12595e-146	0.290554	0.449	0.246	1.339e-141	9
Cklf	3.8676e-218	0.290198	0.412	0.164	1.25515e-213	9
Sema4d	2.1358e-133	0.289851	0.411	0.23	6.93132e-129	9
Clint1	1.49419e-132	0.289802	0.554	0.384	4.84908e-128	9
Mif4gd	0	0.289605	0.381	0.092	0	9
Cnih4	5.29446e-153	0.289584	0.538	0.332	1.71821e-148	9
Mid1ip1	4.47085e-102	0.287857	0.723	0.615	1.45092e-97	9
Pdia4	3.80281e-108	0.287564	0.577	0.425	1.23413e-103	9
Rasa3	0	0.287479	0.374	0.085	0	9
Arap3	0	0.28685	0.294	0.011	0	9
Hmgcl	5.81802e-132	0.286789	0.504	0.321	1.88812e-127	9
Csad	1.57374e-155	0.286208	0.429	0.219	5.10727e-151	9
Mindy2	1.56341e-110	0.286002	0.532	0.343	5.07373e-106	9
Tec	0	0.285385	0.3	0.013	0	9
Tspan33	1.11538e-126	0.28466	0.407	0.228	3.61973e-122	9
Pld1	0	0.2846	0.292	0.02	0	9
Tmem135	5.93028e-133	0.284478	0.447	0.263	1.92455e-128	9
Mlec	2.83553e-114	0.283797	0.627	0.474	9.20214e-110	9
Acaa1a	5.30111e-133	0.283505	0.724	0.595	1.72037e-128	9
Prps2	0	0.28305	0.323	0.064	0	9
Cbl	3.43752e-94	0.282545	0.595	0.484	1.11558e-89	9
Plekha2	0	0.282452	0.305	0.021	0	9
Slc2a8	9.00428e-220	0.282412	0.404	0.155	2.92216e-215	9
Snx9	1.39032e-257	0.281904	0.349	0.104	4.512e-253	9
P4ha1	1.66315e-171	0.281878	0.436	0.211	5.39742e-167	9
Tpx2	8.31739e-228	0.281722	0.163	0.018	2.69924e-223	9
Hpf1	1.98337e-105	0.281214	0.522	0.349	6.43664e-101	9
Vav2	1.10082e-215	0.281022	0.387	0.142	3.57249e-211	9
Eef1a1	6.56302e-168	0.279891	1	0.999	2.1299e-163	9
Zfp652	2.50802e-124	0.279442	0.448	0.265	8.13928e-120	9
Irak2	4.32941e-166	0.279324	0.375	0.165	1.40502e-161	9
Hdlbp	1.84189e-115	0.278906	0.585	0.445	5.97749e-111	9
Cers2	4.0193e-121	0.278784	0.67	0.53	1.30438e-116	9
Cpne3	1.20146e-289	0.278584	0.371	0.102	3.89911e-285	9
Map2k1	2.67582e-107	0.277966	0.716	0.567	8.68385e-103	9
Havcr2	0	0.277955	0.255	0.004	0	9
Cnp	2.37257e-95	0.277892	0.541	0.393	7.6997e-91	9
Nhlrc3	4.96678e-250	0.277507	0.329	0.092	1.61187e-245	9
Ubash3b	1.78505e-134	0.277484	0.564	0.344	5.79302e-130	9
Slc37a2	0	0.277176	0.272	0.012	0	9
Pik3cd	4.11172e-226	0.276614	0.361	0.121	1.33438e-221	9
Oaz1	3.29934e-274	0.276085	0.998	0.995	1.07074e-269	9
Derl2	1.41762e-132	0.275926	0.525	0.344	4.60062e-128	9
Rpl32	3.3281e-197	0.275897	1	0.993	1.08007e-192	9
Itgav	0	0.275838	0.342	0.043	0	9
Adam10	6.26046e-107	0.275756	0.62	0.486	2.03171e-102	9
Ctbs	0	0.275655	0.312	0.059	0	9
Arhgdia	2.39858e-152	0.275621	0.958	0.91	7.78411e-148	9
Hps4	4.50829e-104	0.275565	0.493	0.342	1.46307e-99	9
Heatr5a	2.23812e-305	0.275121	0.33	0.076	7.26336e-301	9
Atp1b3	6.95481e-94	0.275112	0.679	0.592	2.25704e-89	9
Rock1	1.10334e-117	0.274805	0.557	0.394	3.58067e-113	9
Ifi35	0	0.274598	0.29	0.011	0	9
Mpi	5.11114e-102	0.274163	0.474	0.321	1.65872e-97	9
Csf2rb	0	0.273907	0.269	0.007	0	9
Itm2c	3.98855e-116	0.273766	0.954	0.855	1.2944e-111	9
Vps37b	6.61505e-101	0.27354	0.549	0.397	2.14678e-96	9
Liph	0	0.273113	0.252	0.007	0	9
Slc43a2	1.17214e-137	0.272112	0.387	0.197	3.80394e-133	9
Evi5	3.90229e-118	0.271978	0.501	0.326	1.26641e-113	9
Rilpl1	1.84672e-128	0.271949	0.43	0.246	5.99317e-124	9
Sipa1l2	1.53822e-219	0.271619	0.375	0.132	4.99197e-215	9
Capza1	2.10186e-116	0.271565	0.644	0.511	6.82117e-112	9
Ddx5	2.87666e-175	0.271286	0.997	0.994	9.33561e-171	9
Gmnn	9.31416e-111	0.270876	0.255	0.106	3.02272e-106	9
Hadha	2.71695e-124	0.270763	0.592	0.422	8.81732e-120	9
Ccdc22	4.95275e-137	0.270344	0.437	0.245	1.60732e-132	9
Eva1a	0	0.270193	0.269	0.02	0	9
Cysltr1	0	0.269297	0.263	0.004	0	9
Abcg2	6.76822e-179	0.269067	0.409	0.18	2.19649e-174	9
Zfyve21	3.01338e-305	0.269035	0.404	0.11	9.77933e-301	9
Vrk2	0	0.268718	0.289	0.016	0	9
Pla2g4a	0	0.268296	0.266	0.004	0	9
Lrrfip1	1.53625e-92	0.267971	0.469	0.33	4.98558e-88	9
Zbtb18	4.73907e-209	0.267604	0.338	0.115	1.53797e-204	9
Sptlc2	9.56548e-106	0.267463	0.556	0.419	3.10429e-101	9
Lpxn	0	0.267343	0.263	0.01	0	9
Brd2	4.60108e-56	0.266728	0.796	0.802	1.49319e-51	9
Ccng2	1.16943e-100	0.266459	0.484	0.311	3.79517e-96	9
Hadhb	4.71963e-136	0.265972	0.595	0.414	1.53166e-131	9
Rgs7bp	1.58263e-129	0.265793	0.363	0.179	5.1361e-125	9
Tln2	2.63065e-97	0.26565	0.431	0.272	8.53726e-93	9
H2-DMa	2.46875e-76	0.265648	0.334	0.206	8.01182e-72	9
Atp13a3	1.66863e-128	0.265513	0.428	0.241	5.41522e-124	9
Egr2	0	0.265491	0.19	0.011	0	9
Tal1	0	0.264796	0.268	0.015	0	9
Rras	0	0.264597	0.315	0.06	0	9
Tacc3	9.8794e-116	0.264547	0.229	0.084	3.20616e-111	9
Zc3h12a	0	0.263954	0.254	0.008	0	9
Whrn	1.12198e-145	0.263914	0.332	0.142	3.64115e-141	9
Papd4	3.47979e-156	0.263626	0.419	0.21	1.1293e-151	9
Hadh	8.8757e-268	0.263231	0.403	0.124	2.88043e-263	9
Tmem206	8.52567e-133	0.263189	0.395	0.205	2.76684e-128	9
Aftph	7.06852e-96	0.262428	0.495	0.359	2.29395e-91	9
Agmo	0	0.262096	0.263	0.012	0	9
Eloa	1.41505e-207	0.261624	0.317	0.104	4.59225e-203	9
Atp5g2	1.33771e-205	0.261415	0.987	0.98	4.34127e-201	9
2310011J03Rik	1.01999e-154	0.261023	0.514	0.303	3.31017e-150	9
I830077J02Rik	0	0.260695	0.257	0.005	0	9
Hsd17b11	2.53219e-190	0.260285	0.346	0.129	8.21772e-186	9
Eed	1.991e-161	0.260125	0.421	0.202	6.46139e-157	9
Ube2q1	1.61949e-94	0.259764	0.645	0.524	5.25573e-90	9
Scpep1	5.38816e-143	0.259759	0.38	0.185	1.74862e-138	9
Mcm6	2.7143e-74	0.259656	0.245	0.122	8.80871e-70	9
Smo	2.23966e-274	0.259641	0.356	0.092	7.26838e-270	9
Zfp385a	3.95568e-142	0.259141	0.461	0.253	1.28374e-137	9
Itga9	0	0.258076	0.281	0.023	0	9
Lamtor4	2.19697e-95	0.257915	0.85	0.8	7.12982e-91	9
Inpp4b	1.17709e-176	0.25751	0.306	0.107	3.82002e-172	9
Nfya	4.89275e-188	0.257464	0.365	0.139	1.58784e-183	9
Rps5	4.64869e-196	0.257266	0.999	0.993	1.50864e-191	9
Paox	1.07206e-173	0.25662	0.321	0.118	3.47917e-169	9
Ddost	1.24102e-109	0.25661	0.859	0.791	4.02749e-105	9
Derl1	9.23885e-99	0.256254	0.752	0.668	2.99828e-94	9
Zyx	7.80592e-100	0.256075	0.495	0.343	2.53325e-95	9
Tap1	0	0.255979	0.254	0.015	0	9
Oat	7.89799e-109	0.255854	0.577	0.427	2.56314e-104	9
Samhd1	1.08399e-114	0.255732	0.364	0.193	3.51788e-110	9
Anp32a	3.35778e-98	0.255686	0.852	0.82	1.0897e-93	9
Rpl36a	3.49769e-147	0.255557	0.989	0.98	1.13511e-142	9
Aph1a	4.94568e-97	0.254933	0.655	0.558	1.60502e-92	9
Rxrb	2.4719e-101	0.254695	0.518	0.371	8.02205e-97	9
Nipa2	7.92171e-87	0.254659	0.558	0.44	2.57083e-82	9
Blvra	1.37367e-113	0.254577	0.391	0.221	4.45798e-109	9
Ddrgk1	3.28437e-93	0.254515	0.763	0.673	1.06588e-88	9
Anp32b	1.88596e-23	0.254276	0.789	0.837	6.12051e-19	9
Scoc	6.92031e-55	0.253952	0.882	0.828	2.24585e-50	9
Stard9	1.3993e-204	0.253831	0.322	0.104	4.54116e-200	9
Tfpi	1.17723e-296	0.253819	0.338	0.078	3.82048e-292	9
Casp6	3.27994e-254	0.253751	0.357	0.103	1.06444e-249	9
Col4a1	1.83731e-05	0.253735	0.095	0.134	0.596261	9
Pgk1	1.58118e-63	0.253726	0.696	0.557	5.1314e-59	9
Cenpe	2.68172e-174	0.252991	0.146	0.021	8.70299e-170	9
Mbd2	8.25036e-98	0.252929	0.482	0.335	2.67749e-93	9
Nfatc1	0	0.252771	0.277	0.023	0	9
S100a1	1.39424e-225	0.252312	0.28	0.066	4.52474e-221	9
Rcc2	8.06892e-101	0.252238	0.574	0.421	2.61861e-96	9
Adam9	8.3612e-209	0.251871	0.336	0.111	2.71346e-204	9
Ly96	0	0.251708	0.271	0.022	0	9
Dgkd	1.59464e-75	0.251484	0.472	0.354	5.17509e-71	9
Tpm4	1.64282e-23	0.251388	0.447	0.384	5.33144e-19	9
Msrb2	2.30115e-152	0.251387	0.377	0.174	7.46792e-148	9
Cln5	4.63558e-169	0.251096	0.369	0.156	1.50438e-164	9
2810474O19Rik	3.02697e-85	0.250917	0.441	0.294	9.82342e-81	9
Anxa5	2.12563e-23	0.250806	0.429	0.386	6.8983e-19	9
Gatd1	1.28216e-102	0.250762	0.414	0.258	4.16099e-98	9
Ubn1	2.14503e-85	0.250712	0.599	0.489	6.96127e-81	9
Eef1b2	2.45894e-135	0.25023	0.991	0.981	7.98001e-131	9
Tmem219	1.23973e-94	0.250212	0.574	0.44	4.02329e-90	9

## Sheet: VLMC
Figure 1-source data 2. Feature genes that define each of the 11 Pomc clusters
integrated across all six developmental stages.
The data are sorted from highest to lowest for each integrated custer by average log fold-change > 0.25
(avg_logFC) of gene expression in the featured cluster relative to all other clusters
pct.1, Percentage of cells in the indicated cluster with significant differential gene expression
pct.2, Percentage of cells in all other clusters with significant differential gene expression
p-val, p-value
p_val_adj, adjusted p-value for multiple comparisons
The Wilcoxon test was performed to identify the differentially expressed genes in each cluster
Gene	p_val	avg_logFC	pct.1	pct.2	p_val_adj	cluster
Col3a1	0	3.49454	0.992	0.051	0	10
Vtn	0	3.08725	0.962	0.035	0	10
Col1a2	0	3.04128	0.992	0.053	0	10
Lgals1	0	2.89218	0.996	0.124	0	10
Col1a1	0	2.80307	0.985	0.031	0	10
Cxcl12	0	2.74819	0.989	0.038	0	10
Dcn	0	2.71864	0.793	0.018	0	10
H19	0	2.7147	0.831	0.045	0	10
Serpinh1	3.30149e-300	2.66332	1	0.216	1.07143e-295	10
Igfbp2	1.07165e-212	2.55685	0.992	0.341	3.47781e-208	10
Ptgds	1.64262e-16	2.5066	0.195	0.069	5.33078e-12	10
Pltp	0	2.3822	0.95	0.049	0	10
Col4a1	0	2.27424	0.981	0.111	0	10
Bgn	0	2.27221	0.985	0.03	0	10
Mdk	0	2.08619	0.989	0.159	0	10
Lum	0	2.05445	0.954	0.023	0	10
S100a11	0	2.0122	0.996	0.196	0	10
S100a6	0	2.00885	0.831	0.048	0	10
Anxa2	0	2.00674	0.989	0.08	0	10
Igfbp4	4.37325e-205	1.89144	0.989	0.329	1.41925e-200	10
Col4a2	0	1.88515	0.977	0.151	0	10
Cthrc1	5.34231e-305	1.88259	0.973	0.189	1.73374e-300	10
Rbp1	6.27275e-212	1.87185	0.989	0.291	2.03569e-207	10
Mfap2	3.11163e-163	1.8455	0.973	0.457	1.00982e-158	10
Mest	1.64338e-156	1.84182	0.95	0.428	5.33325e-152	10
Cdkn1c	9.51379e-140	1.81072	0.985	0.415	3.08751e-135	10
Mfap4	0	1.794	0.939	0.049	0	10
Slc6a13	0	1.78422	0.774	0.021	0	10
Ifitm2	0	1.77583	0.996	0.173	0	10
Fbln1	0	1.75269	0.885	0.059	0	10
Nbl1	0	1.74297	0.839	0.054	0	10
Apod	0	1.73569	0.931	0.02	0	10
Colec12	0	1.73246	0.973	0.04	0	10
Islr	0	1.72982	0.897	0.023	0	10
Igf2	0	1.71806	0.92	0.023	0	10
Sepp1	0	1.68831	0.808	0.033	0	10
Zic1	0	1.68739	0.985	0.099	0	10
Vim	2.73793e-153	1.68737	1	0.549	8.8854e-149	10
Id3	0	1.67319	0.969	0.122	0	10
Rcn3	0	1.65217	0.969	0.094	0	10
Gja1	0	1.63316	0.916	0.07	0	10
Col26a1	0	1.61308	0.981	0.062	0	10
Phlda1	8.40719e-169	1.6051	0.973	0.416	2.72838e-164	10
Ptn	8.38267e-113	1.60389	0.989	0.712	2.72043e-108	10
Gpc3	1.86563e-307	1.60061	0.931	0.161	6.05451e-303	10
Serpinf1	0	1.57814	0.931	0.122	0	10
Nkd1	0	1.57246	0.916	0.087	0	10
Ppic	0	1.54786	0.973	0.046	0	10
Laptm4a	2.33147e-140	1.54521	1	0.921	7.56633e-136	10
Ramp2	0	1.53776	0.824	0.061	0	10
1810058I24Rik	5.94143e-151	1.46104	0.992	0.692	1.92817e-146	10
Fstl1	5.57132e-268	1.45239	0.989	0.23	1.80806e-263	10
Slc22a6	0	1.44841	0.847	0.016	0	10
Atp1a2	1.02337e-305	1.43675	0.904	0.132	3.32114e-301	10
Itm2a	3.7988e-275	1.42532	0.835	0.13	1.23282e-270	10
Col18a1	0	1.42492	0.801	0.044	0	10
Col6a1	0	1.40535	0.904	0.03	0	10
Bmp7	0	1.39795	0.862	0.117	0	10
Emp3	0	1.392	0.95	0.132	0	10
Fbn2	0	1.39053	0.923	0.053	0	10
Nid2	0	1.38091	0.824	0.054	0	10
Tbx18	0	1.3528	0.912	0.016	0	10
Vamp5	0	1.34609	0.663	0.046	0	10
Cnn2	0	1.34146	0.862	0.04	0	10
Col6a2	0	1.3409	0.92	0.04	0	10
Gpx8	0	1.33783	0.962	0.044	0	10
Eva1b	0	1.30246	0.916	0.092	0	10
Anxa5	5.68596e-169	1.29376	0.973	0.383	1.84527e-164	10
Myl12a	1.0621e-167	1.29355	0.985	0.381	3.44685e-163	10
Cldn11	0	1.2904	0.648	0.038	0	10
Itih5	0	1.28455	0.831	0.031	0	10
Tpm4	3.42303e-166	1.28315	0.962	0.385	1.11088e-161	10
Hes1	1.37297e-269	1.27721	0.885	0.139	4.45571e-265	10
Sparcl1	5.17862e-213	1.26875	0.969	0.263	1.68062e-208	10
Flrt2	4.73589e-308	1.25083	0.935	0.156	1.53694e-303	10
Sparc	1.20412e-149	1.24883	0.996	0.28	3.90774e-145	10
Col5a2	0	1.21944	0.9	0.034	0	10
Osr1	0	1.21465	0.797	0.012	0	10
Plat	0	1.20986	0.843	0.107	0	10
Pcolce	0	1.19444	0.732	0.03	0	10
Timp3	0	1.19118	0.874	0.116	0	10
Wls	0	1.18677	0.946	0.134	0	10
Gpx7	1.18027e-236	1.17992	0.9	0.197	3.83032e-232	10
Arhgap29	0	1.17944	0.897	0.031	0	10
Mmp2	0	1.173	0.851	0.063	0	10
Anxa6	9.74222e-287	1.1725	0.912	0.16	3.16164e-282	10
Cald1	3.27763e-291	1.17105	0.92	0.159	1.06369e-286	10
Ifitm1	0	1.16023	0.686	0.01	0	10
Slc1a3	0	1.15548	0.939	0.117	0	10
Rpl13a	3.34817e-120	1.15443	0.985	0.82	1.08658e-115	10
Rdh10	3.47061e-289	1.15027	0.793	0.109	1.12632e-284	10
Epha7	1.74743e-294	1.1383	0.862	0.13	5.67094e-290	10
Nid1	0	1.13423	0.897	0.033	0	10
Cd63	1.02564e-115	1.11289	0.992	0.729	3.32851e-111	10
Gjb6	0	1.1049	0.517	0.03	0	10
Lpar1	0	1.10257	0.908	0.092	0	10
Tpst1	1.01439e-186	1.07963	0.931	0.286	3.29199e-182	10
Nr2f2	2.8469e-269	1.0769	0.916	0.152	9.23903e-265	10
Zfp36l1	1.929e-228	1.06799	0.985	0.203	6.26017e-224	10
Selm	0	1.06553	0.851	0.111	0	10
Aebp1	0	1.06487	0.716	0.024	0	10
Svil	0	1.06356	0.747	0.058	0	10
Tpbg	5.64188e-250	1.0613	0.701	0.094	1.83096e-245	10
Oaf	0	1.05412	0.874	0.094	0	10
Angptl4	0	1.05245	0.889	0.053	0	10
Copz2	0	1.05242	0.912	0.058	0	10
Ccnd3	6.47977e-253	1.04828	0.939	0.193	2.10288e-248	10
Efemp2	0	1.04213	0.897	0.101	0	10
Nupr1	0	1.04201	0.621	0.049	0	10
Lamb1	0	1.03156	0.82	0.02	0	10
Ppib	7.2571e-116	1.03015	1	0.863	2.35515e-111	10
Rhoc	6.62787e-229	1.02575	0.935	0.212	2.15094e-224	10
Emp1	0	1.01067	0.778	0.021	0	10
Txndc5	4.16722e-147	1.00947	0.966	0.438	1.35239e-142	10
Serf2	7.38106e-140	1.00594	1	0.956	2.39537e-135	10
Akap12	5.15597e-126	0.992226	0.908	0.395	1.67327e-121	10
Ngfr	0	0.989022	0.667	0.046	0	10
Vimp	3.78598e-146	0.982096	0.847	0.24	1.22866e-141	10
Nap1l1	1.13517e-122	0.979599	0.989	0.891	3.68397e-118	10
Rcn1	1.14488e-154	0.979142	0.962	0.4	3.71547e-150	10
Fkbp10	0	0.977776	0.877	0.028	0	10
Prdx4	2.50479e-109	0.97651	0.904	0.459	8.12878e-105	10
Hadh	1.04486e-273	0.973639	0.912	0.16	3.39087e-269	10
Pdlim2	0	0.972396	0.82	0.056	0	10
Tfpi	0	0.969027	0.835	0.112	0	10
Tmem150a	7.80688e-143	0.957901	0.732	0.193	2.53357e-138	10
Tead2	0	0.95182	0.881	0.048	0	10
Fmod	0	0.948629	0.421	0.004	0	10
Foxc1	0	0.948146	0.866	0.02	0	10
Tmem132c	2.08493e-281	0.936784	0.77	0.103	6.76623e-277	10
Arl4a	1.99105e-87	0.931453	0.985	0.683	6.46154e-83	10
Grb10	1.1469e-109	0.929378	0.954	0.491	3.72205e-105	10
Cmtm3	3.01356e-224	0.923422	0.904	0.179	9.77991e-220	10
Col23a1	0	0.922906	0.801	0.071	0	10
Tgfb1i1	2.2556e-236	0.922178	0.843	0.162	7.32011e-232	10
Lhfp	0	0.917908	0.874	0.077	0	10
Tgm2	0	0.909107	0.628	0.011	0	10
Bicc1	0	0.904185	0.728	0.064	0	10
Lmo4	3.44507e-126	0.903467	0.908	0.341	1.11803e-121	10
Fn1	0	0.895665	0.644	0.031	0	10
Ptk7	3.90111e-291	0.894578	0.854	0.129	1.26603e-286	10
Atp5o	3.86694e-93	0.893687	0.935	0.435	1.25494e-88	10
Raly	1.43543e-116	0.891821	0.996	0.87	4.65841e-112	10
Lrrc17	0	0.886742	0.682	0.025	0	10
Zic4	0	0.88662	0.82	0.062	0	10
P4hb	4.67039e-123	0.882347	0.977	0.552	1.51568e-118	10
Gng11	0	0.880264	0.793	0.035	0	10
Tpm1	3.51601e-86	0.879562	0.927	0.588	1.14105e-81	10
Foxd1	0	0.878661	0.716	0.029	0	10
Wdr86	0	0.877469	0.743	0.019	0	10
Prss23	0	0.871408	0.544	0.016	0	10
Ifitm3	0	0.866724	0.628	0.039	0	10
Gnb2l1	4.87101e-91	0.863599	0.939	0.452	1.58079e-86	10
Dab2	3.42015e-307	0.863567	0.82	0.098	1.10994e-302	10
Gsn	9.18565e-197	0.859022	0.713	0.125	2.98102e-192	10
Vstm4	0	0.856849	0.663	0.021	0	10
Cd248	0	0.856415	0.747	0.015	0	10
Lamc3	0	0.854943	0.743	0.016	0	10
Nrep	7.04067e-98	0.852058	0.981	0.575	2.28491e-93	10
Col5a1	0	0.849953	0.759	0.018	0	10
Cnn3	1.62773e-114	0.849317	0.935	0.356	5.28248e-110	10
Stra6	0	0.845808	0.617	0.023	0	10
Emilin1	0	0.842239	0.751	0.05	0	10
Rps15	3.0248e-97	0.839855	0.996	0.967	9.81638e-93	10
Myl9	0	0.837799	0.713	0.044	0	10
Pcca	5.42769e-176	0.836507	0.824	0.203	1.76145e-171	10
Tril	1.75333e-208	0.831367	0.904	0.196	5.69008e-204	10
Slc41a1	2.30503e-243	0.830875	0.759	0.117	7.48051e-239	10
Tcf12	4.56752e-120	0.828802	0.95	0.466	1.4823e-115	10
Ost4	4.28733e-104	0.823244	0.981	0.689	1.39137e-99	10
Hbb-y	6.24471e-70	0.822811	0.801	0.289	2.0266e-65	10
Nkain4	5.32642e-128	0.821357	0.724	0.188	1.72858e-123	10
P3h3	2.62916e-146	0.821055	0.808	0.227	8.53241e-142	10
Slc9a3r1	1.71202e-219	0.820918	0.82	0.139	5.55602e-215	10
Sept2	1.95697e-150	0.820439	0.893	0.269	6.35094e-146	10
H2afv	7.88351e-101	0.818711	0.996	0.823	2.55844e-96	10
Slc6a20a	0	0.816989	0.605	0.03	0	10
Tnfrsf19	0	0.807356	0.793	0.077	0	10
Fkbp9	0	0.801049	0.828	0.103	0	10
Id1	4.75363e-197	0.793549	0.667	0.105	1.5427e-192	10
Pard6g	1.73627e-137	0.790649	0.897	0.314	5.63472e-133	10
Add3	1.18153e-115	0.788155	0.877	0.346	3.83444e-111	10
Cdh5	0	0.78553	0.598	0.008	0	10
Cstb	1.65888e-98	0.783924	0.969	0.596	5.38357e-94	10
Isyna1	1.38397e-73	0.783712	0.927	0.639	4.4914e-69	10
Shfm1	1.67381e-78	0.780129	0.935	0.447	5.43201e-74	10
Tpm2	0	0.779245	0.766	0.071	0	10
Edn3	0	0.777193	0.724	0.012	0	10
Gjb2	0	0.774456	0.429	0.009	0	10
Rpl17	1.76866e-102	0.77399	1	0.984	5.73984e-98	10
Prkcdbp	0	0.773665	0.705	0.037	0	10
Rbms1	3.49766e-116	0.771508	0.923	0.405	1.13509e-111	10
Sep15	1.55944e-89	0.771436	0.931	0.43	5.06085e-85	10
Angptl2	0	0.770746	0.571	0.014	0	10
Fam174b	4.29402e-117	0.769035	0.835	0.32	1.39354e-112	10
Wnt4	1.11832e-45	0.765864	0.563	0.257	3.62929e-41	10
Rpl23a	3.86408e-80	0.765284	0.992	0.952	1.25401e-75	10
Mxra8	0	0.764624	0.67	0.035	0	10
Vcan	2.57806e-92	0.760589	0.808	0.307	8.36657e-88	10
Rhoj	0	0.757249	0.594	0.026	0	10
Cdc42ep5	0	0.757175	0.782	0.05	0	10
Ranbp3l	0	0.756311	0.605	0.008	0	10
Gng5	2.83484e-84	0.74858	1	0.867	9.19992e-80	10
Rplp1	2.9135e-109	0.7454	1	0.995	9.45519e-105	10
Rps14	1.97998e-97	0.744645	1	0.993	6.42563e-93	10
Pdgfra	0	0.740953	0.739	0.014	0	10
Hmgcs2	0	0.739812	0.521	0.006	0	10
Tcf4	1.48175e-83	0.736668	0.969	0.585	4.80873e-79	10
Ahnak	0	0.735861	0.72	0.034	0	10
Eln	1.08409e-119	0.734978	0.333	0.04	3.5182e-115	10
Rpl14	4.78622e-108	0.729859	1	0.99	1.55327e-103	10
Tmem167	2.44462e-86	0.726248	0.977	0.775	7.93353e-82	10
Rpl31	1.20514e-85	0.725186	1	0.975	3.91103e-81	10
Rnf181	9.86515e-43	0.719079	0.705	0.444	3.20154e-38	10
Rps18	8.99727e-116	0.71902	1	0.993	2.91989e-111	10
Ccnd2	9.04617e-263	0.718776	0.575	0.054	2.93575e-258	10
Ctsk	0	0.713299	0.567	0.023	0	10
Galk1	2.87657e-147	0.712278	0.835	0.247	9.33534e-143	10
Pdgfrb	0	0.710646	0.709	0.02	0	10
Crip1	3.86204e-89	0.709554	0.563	0.15	1.25335e-84	10
Tmem100	4.73385e-155	0.703828	0.59	0.096	1.53627e-150	10
Rpl28	4.15608e-119	0.700502	1	0.992	1.34877e-114	10
Nr2f1	2.66617e-245	0.700108	0.843	0.126	8.65252e-241	10
Rpl10	2.75799e-96	0.697395	1	0.991	8.9505e-92	10
Fcgrt	2.85535e-151	0.697372	0.797	0.167	9.26645e-147	10
Msx1	0	0.695059	0.51	0.017	0	10
Ptgis	0	0.692048	0.602	0.033	0	10
Calu	6.8815e-110	0.691553	0.877	0.384	2.23325e-105	10
Flna	1.8452e-148	0.688228	0.831	0.232	5.98823e-144	10
Rps17	1.42323e-81	0.686954	0.996	0.975	4.61881e-77	10
Rps6	1.24129e-83	0.68511	1	0.984	4.02836e-79	10
Serping1	2.74087e-187	0.684502	0.582	0.083	8.89494e-183	10
Hic1	0	0.683082	0.701	0.012	0	10
Ssr2	7.12887e-78	0.677415	0.989	0.833	2.31353e-73	10
Col6a3	0	0.675002	0.659	0.051	0	10
Aldh1a2	0	0.671582	0.444	0.006	0	10
Aldh7a1	5.28666e-130	0.671025	0.778	0.224	1.71568e-125	10
Rpl36a	8.97042e-102	0.666897	1	0.981	2.91117e-97	10
Gramd3	0	0.664522	0.651	0.041	0	10
Kdelr2	1.21559e-63	0.66095	0.904	0.61	3.94495e-59	10
Sp5	0	0.657711	0.575	0.012	0	10
Twist1	0	0.657604	0.628	0.02	0	10
Rps8	4.22901e-111	0.65157	1	0.993	1.37244e-106	10
Enpp2	2.5899e-163	0.648932	0.464	0.058	8.405e-159	10
Col13a1	0	0.648096	0.571	0.012	0	10
Csrp2	1.55903e-59	0.647266	0.881	0.537	5.05952e-55	10
Il11ra1	8.5843e-103	0.645879	0.713	0.216	2.78586e-98	10
Kdelr1	3.97762e-78	0.644813	0.977	0.788	1.29086e-73	10
Cat	4.38612e-88	0.644449	0.785	0.307	1.42343e-83	10
Ckap4	5.85311e-76	0.644203	0.912	0.56	1.89951e-71	10
S100a10	1.79586e-59	0.642409	0.916	0.509	5.8281e-55	10
Pmp22	4.61764e-130	0.641644	0.736	0.173	1.49856e-125	10
Klf13	5.86611e-70	0.639695	0.885	0.519	1.90373e-65	10
Dap	1.98312e-98	0.63786	0.843	0.325	6.43583e-94	10
Loxl1	0	0.637238	0.602	0.034	0	10
Cdk4	4.08212e-64	0.636072	0.992	0.864	1.32477e-59	10
Slc19a1	5.47923e-124	0.634719	0.651	0.16	1.77818e-119	10
Tcf3	3.14464e-89	0.63123	0.904	0.455	1.02053e-84	10
Axin2	1.61067e-196	0.630638	0.701	0.119	5.22709e-192	10
Rbms2	0	0.630143	0.747	0.07	0	10
Pfn1	2.25929e-74	0.629872	1	0.98	7.33207e-70	10
Pofut2	7.79258e-89	0.629254	0.893	0.471	2.52893e-84	10
Glipr2	8.6213e-161	0.628681	0.732	0.154	2.79787e-156	10
Foxc2	0	0.625366	0.533	0.009	0	10
Col4a5	0	0.621879	0.575	0.018	0	10
Rps27	2.34146e-86	0.621769	1	0.994	7.59875e-82	10
Bcl7c	9.64367e-81	0.620763	0.916	0.575	3.12966e-76	10
Slc7a11	3.0459e-199	0.620303	0.441	0.04	9.88485e-195	10
Gsta4	3.08141e-221	0.618718	0.521	0.053	1.00001e-216	10
Siva1	6.0636e-89	0.618646	0.82	0.362	1.96782e-84	10
Pid1	5.52437e-82	0.618059	0.862	0.378	1.79282e-77	10
Mdfi	1.49026e-306	0.615831	0.67	0.064	4.83636e-302	10
Notch2	3.37669e-139	0.614911	0.552	0.092	1.09584e-134	10
Rsu1	5.19152e-85	0.614875	0.877	0.429	1.6848e-80	10
Mmp11	1.15607e-175	0.614057	0.575	0.083	3.7518e-171	10
Rpl4	7.70059e-85	0.61335	1	0.987	2.49907e-80	10
Mmp14	0	0.610191	0.693	0.059	0	10
Serp1	3.81864e-71	0.60989	0.885	0.515	1.23926e-66	10
Rps23	1.85755e-94	0.608272	1	0.994	6.02831e-90	10
Kdelr3	0	0.608012	0.579	0.012	0	10
Maged2	3.31309e-53	0.604826	0.977	0.806	1.0752e-48	10
Prrx2	0	0.604776	0.602	0.015	0	10
Sri	9.74741e-67	0.604729	0.904	0.626	3.16333e-62	10
Parm1	2.91477e-129	0.604355	0.651	0.149	9.4593e-125	10
Rpl7	2.28996e-101	0.603983	1	0.992	7.43161e-97	10
Rab13	9.25543e-258	0.602098	0.686	0.086	3.00366e-253	10
Prrx1	0	0.601864	0.663	0.033	0	10
Cp	0	0.600472	0.479	0.014	0	10
Ogn	0	0.600056	0.261	0.002	0	10
Ctdsp2	6.42318e-139	0.599078	0.774	0.202	2.08451e-134	10
Zic5	0	0.598917	0.674	0.028	0	10
Mpzl1	1.50723e-60	0.598764	0.862	0.529	4.89143e-56	10
H1f0	1.06291e-46	0.597399	0.881	0.588	3.44945e-42	10
a	0	0.596965	0.571	0.007	0	10
Ak3	4.99685e-101	0.596283	0.824	0.327	1.62163e-96	10
Slc38a3	0	0.592954	0.617	0.037	0	10
2700060E02Rik	2.21397e-59	0.592907	0.935	0.44	7.185e-55	10
Tpcn1	4.93725e-227	0.591432	0.709	0.098	1.60229e-222	10
Heyl	0	0.590327	0.498	0.026	0	10
Cdh11	3.4025e-102	0.590053	0.674	0.189	1.10421e-97	10
Rab34	4.96483e-77	0.588441	0.847	0.435	1.61124e-72	10
Sfrp1	2.14665e-133	0.588356	0.59	0.116	6.96652e-129	10
Sept11	2.05695e-73	0.58829	0.946	0.602	6.67542e-69	10
Vamp8	3.05918e-86	0.587384	0.697	0.189	9.92796e-82	10
Crtap	0	0.586847	0.667	0.062	0	10
Fkbp7	4.30386e-258	0.58676	0.651	0.073	1.39673e-253	10
Rps25	4.27153e-75	0.58329	1	0.982	1.38624e-70	10
Lamc1	9.03801e-220	0.583261	0.674	0.096	2.9331e-215	10
Lama2	0	0.582952	0.571	0.022	0	10
Gm10073	5.66345e-76	0.581493	0.866	0.396	1.83796e-71	10
Yap1	0	0.580583	0.674	0.025	0	10
Krtcap2	4.55037e-82	0.580434	0.996	0.877	1.47673e-77	10
Ech1	1.40257e-58	0.579995	0.874	0.57	4.55177e-54	10
Wbp5	5.37499e-54	0.578563	0.931	0.448	1.74434e-49	10
Bsg	9.50439e-40	0.578148	1	0.977	3.08446e-35	10
Scarf2	0	0.575623	0.625	0.043	0	10
Snai1	0	0.574176	0.617	0.039	0	10
Ostc	5.813e-62	0.573541	0.985	0.84	1.88649e-57	10
Wnt6	8.21113e-249	0.57322	0.303	0.014	2.66476e-244	10
Creb3l1	8.37865e-244	0.573116	0.651	0.08	2.71912e-239	10
Rps15a	1.60271e-88	0.572434	1	0.994	5.20126e-84	10
Tmem64	1.40383e-108	0.571762	0.705	0.202	4.55585e-104	10
Arhgef25	1.52383e-107	0.570382	0.739	0.241	4.94529e-103	10
Cpq	1.25572e-98	0.569528	0.663	0.185	4.07519e-94	10
Fam195b	2.06186e-69	0.568716	0.923	0.404	6.69135e-65	10
Eci2	1.47275e-62	0.568052	0.923	0.624	4.7795e-58	10
Cpxm1	5.90671e-159	0.567882	0.559	0.087	1.91691e-154	10
Cyp1b1	0	0.567703	0.605	0.01	0	10
Etfb	5.1767e-64	0.56732	0.939	0.652	1.67999e-59	10
Snhg18	3.86101e-150	0.566342	0.602	0.11	1.25301e-145	10
Pth1r	9.79131e-222	0.566155	0.609	0.076	3.17758e-217	10
C1qtnf2	4.66854e-188	0.564779	0.556	0.076	1.51508e-183	10
Ctnnb1	2.01062e-66	0.564239	0.985	0.791	6.52506e-62	10
Tmem165	1.71289e-74	0.560078	0.9	0.553	5.55884e-70	10
Vkorc1	2.75944e-68	0.558662	0.831	0.427	8.95522e-64	10
Sept9	1.41249e-77	0.558349	0.866	0.416	4.58395e-73	10
Tubb6	2.91419e-304	0.557716	0.54	0.04	9.45742e-300	10
Cd302	1.05537e-112	0.556722	0.755	0.201	3.42499e-108	10
Cfh	2.16668e-73	0.556608	0.636	0.175	7.03151e-69	10
S1pr3	0	0.556576	0.582	0.026	0	10
Cped1	0	0.555916	0.632	0.02	0	10
Efnb1	1.05137e-63	0.555885	0.824	0.435	3.412e-59	10
Lox	0	0.555336	0.383	0.004	0	10
Rps12	4.58464e-75	0.55481	1	0.985	1.48785e-70	10
Uaca	0	0.553241	0.628	0.036	0	10
Sulf2	7.22949e-48	0.552461	0.709	0.384	2.34619e-43	10
Ppp1r1a	7.28333e-11	0.549014	0.789	0.701	2.36366e-06	10
Rrbp1	1.56749e-67	0.545165	0.943	0.52	5.08697e-63	10
Bmp5	0	0.540483	0.548	0.011	0	10
Surf4	2.3546e-61	0.540036	0.854	0.521	7.6414e-57	10
Pdia6	5.56664e-44	0.5389	0.95	0.797	1.80654e-39	10
Rpl26	2.77251e-88	0.538218	1	0.994	8.99764e-84	10
Rplp2	4.19554e-84	0.53747	1	0.992	1.36158e-79	10
Hmgn3	1.29255e-49	0.536602	0.962	0.657	4.19472e-45	10
Rps27l	5.81781e-58	0.534976	0.977	0.866	1.88805e-53	10
Acaa2	2.92185e-92	0.533074	0.739	0.258	9.48229e-88	10
Rps4x	3.61315e-85	0.531469	1	0.996	1.17258e-80	10
Fam114a1	0	0.529131	0.644	0.032	0	10
Wipi1	6.26328e-200	0.528602	0.67	0.103	2.03262e-195	10
Eef1d	1.69733e-58	0.52652	0.981	0.805	5.50834e-54	10
Tle1	1.67182e-82	0.526072	0.709	0.25	5.42556e-78	10
Mxd4	2.85912e-65	0.525135	0.831	0.451	9.27869e-61	10
Arhgap20	1.34034e-60	0.521139	0.701	0.304	4.34982e-56	10
Fbn1	2.1474e-275	0.521043	0.609	0.061	6.96895e-271	10
Mesdc2	4.78561e-122	0.520935	0.755	0.195	1.55307e-117	10
Ror2	0	0.518395	0.605	0.037	0	10
Eif4ebp1	2.83163e-128	0.517202	0.686	0.154	9.18949e-124	10
Zcchc24	1.1959e-250	0.516118	0.617	0.064	3.88105e-246	10
Tm4sf1	0	0.515946	0.364	0.011	0	10
Axl	0	0.515774	0.625	0.046	0	10
Rps26	4.85521e-72	0.515707	1	0.985	1.57566e-67	10
Rps27rt	2.2595e-50	0.515276	0.931	0.652	7.33276e-46	10
Hba-a1	4.17329e-61	0.514896	0.743	0.267	1.35436e-56	10
Aard	6.31258e-43	0.5144	0.464	0.172	2.04862e-38	10
Acadl	2.42595e-127	0.513657	0.709	0.168	7.87292e-123	10
Ssr3	8.16449e-58	0.513141	0.966	0.732	2.64962e-53	10
B3gnt9	2.34992e-281	0.511626	0.605	0.059	7.62619e-277	10
Shc1	4.65437e-195	0.511257	0.674	0.106	1.51048e-190	10
Col9a2	1.99407e-47	0.51098	0.433	0.144	6.47136e-43	10
Rpl5	2.3457e-68	0.510648	1	0.972	7.61248e-64	10
Cmbl	1.33766e-34	0.510358	0.437	0.182	4.34111e-30	10
Sdc2	5.40015e-67	0.509027	0.751	0.315	1.75251e-62	10
Rps5	1.0407e-86	0.508804	1	0.994	3.37737e-82	10
Man2a1	1.08976e-150	0.507886	0.559	0.093	3.53658e-146	10
Lama1	6.25506e-219	0.5077	0.51	0.053	2.02996e-214	10
Rpl18a	2.59938e-75	0.507321	1	0.995	8.43577e-71	10
Hba-a2	7.36957e-58	0.507064	0.663	0.24	2.39165e-53	10
Impdh2	6.76297e-53	0.506655	0.916	0.666	2.19479e-48	10
Tcn2	3.62348e-101	0.506267	0.713	0.184	1.17593e-96	10
Plin3	2.55178e-146	0.505934	0.621	0.112	8.2813e-142	10
Atp6v0e	6.71353e-65	0.501836	0.927	0.493	2.17874e-60	10
Rplp0	3.45224e-80	0.501097	1	0.995	1.12035e-75	10
Rpl22	1.02053e-62	0.500517	1	0.967	3.31191e-58	10
Tax1bp3	2.89056e-53	0.500361	0.904	0.53	9.38073e-49	10
Rps20	1.11293e-80	0.49796	1	0.992	3.61179e-76	10
Plp2	1.87406e-130	0.497083	0.605	0.124	6.08188e-126	10
Elovl1	3.4532e-110	0.495096	0.701	0.186	1.12067e-105	10
Rps9	4.79853e-78	0.49313	1	0.995	1.55727e-73	10
Hsd17b10	3.82681e-56	0.493061	0.92	0.631	1.24192e-51	10
Clmp	2.13427e-55	0.492679	0.831	0.475	6.92636e-51	10
Fmo1	9.99238e-218	0.491512	0.425	0.034	3.24283e-213	10
Foxp1	5.10772e-58	0.491397	0.874	0.506	1.65761e-53	10
Cnpy2	6.61564e-54	0.489983	0.989	0.832	2.14697e-49	10
Gas1	5.68649e-185	0.48859	0.448	0.046	1.84544e-180	10
Abracl	5.31994e-54	0.488152	0.87	0.482	1.72648e-49	10
Rps16	2.26235e-79	0.487612	1	0.992	7.342e-75	10
Npm1	2.14225e-64	0.487578	1	0.988	6.95226e-60	10
Kank2	0	0.486342	0.563	0.025	0	10
Prdx1	5.07847e-54	0.486098	0.992	0.923	1.64812e-49	10
Capn2	1.14164e-53	0.484517	0.789	0.442	3.70498e-49	10
Capzb	8.87371e-54	0.48381	0.996	0.924	2.87978e-49	10
Mt2	1.47709e-55	0.482411	0.467	0.141	4.79358e-51	10
Rpl39	3.63827e-74	0.482208	1	0.994	1.18073e-69	10
Ddr2	0	0.47959	0.525	0.014	0	10
Clic4	2.82424e-100	0.478581	0.674	0.182	9.16549e-96	10
Glmp	9.86865e-74	0.47842	0.732	0.275	3.20267e-69	10
Ilk	5.801e-59	0.478114	0.92	0.622	1.8826e-54	10
Ddost	5.743e-48	0.477069	0.958	0.801	1.86378e-43	10
Clic1	2.31694e-68	0.477059	0.977	0.394	7.51915e-64	10
Ctdsp1	3.44051e-194	0.475904	0.686	0.102	1.11655e-189	10
Wwtr1	0	0.475115	0.529	0.027	0	10
Gm8730	1.7406e-68	0.474739	0.862	0.355	5.64877e-64	10
St6galnac3	6.72376e-162	0.473689	0.571	0.09	2.18206e-157	10
Nudt4	3.76e-45	0.472967	0.793	0.487	1.22023e-40	10
Slc22a23	3.53147e-81	0.472802	0.559	0.163	1.14607e-76	10
Tagln	1.75349e-122	0.469631	0.303	0.032	5.69059e-118	10
Col11a1	5.07647e-140	0.468764	0.54	0.091	1.64747e-135	10
Tceb2	6.12592e-30	0.467644	0.939	0.456	1.98804e-25	10
Dact1	2.94167e-63	0.466536	0.54	0.181	9.54661e-59	10
Eif3k	1.01372e-59	0.46645	0.996	0.94	3.28982e-55	10
Pdzrn3	1.34093e-267	0.466383	0.594	0.057	4.35173e-263	10
Rpl12	4.28167e-55	0.466142	1	0.979	1.38953e-50	10
Fzd2	4.22956e-273	0.46344	0.567	0.048	1.37262e-268	10
Hdlbp	2.99701e-57	0.46276	0.828	0.464	9.72618e-53	10
Anp32a	2.96877e-38	0.462083	0.95	0.823	9.63456e-34	10
Serpinb6a	1.08859e-53	0.46163	0.697	0.337	3.5328e-49	10
Fundc2	7.89347e-47	0.461006	0.912	0.707	2.56167e-42	10
Parva	1.08009e-129	0.46061	0.674	0.159	3.50522e-125	10
Rpl8	2.59523e-80	0.459224	1	0.996	8.42229e-76	10
Slc3a2	8.76136e-30	0.459121	0.812	0.564	2.84332e-25	10
Rpl13	2.87421e-81	0.457078	1	0.998	9.32766e-77	10
Cyr61	7.74404e-141	0.456397	0.372	0.04	2.51317e-136	10
Tmem45a	0	0.454695	0.49	0.01	0	10
Egflam	0	0.4543	0.46	0.019	0	10
Fxyd1	6.42134e-175	0.453291	0.471	0.054	2.08392e-170	10
Sdc1	4.6716e-104	0.453112	0.548	0.122	1.51607e-99	10
Gmds	5.66965e-70	0.452744	0.701	0.291	1.83997e-65	10
Ghr	1.72048e-102	0.452374	0.59	0.144	5.58346e-98	10
Tjp1	2.39927e-75	0.4523	0.598	0.183	7.78636e-71	10
Ptbp1	5.63403e-59	0.45224	0.816	0.403	1.82841e-54	10
Trip6	2.15219e-218	0.451278	0.579	0.067	6.98449e-214	10
Tceal8	1.24484e-50	0.449282	0.958	0.776	4.03987e-46	10
Cebpb	3.55383e-19	0.449093	0.533	0.285	1.15333e-14	10
Hba-x	8.46232e-28	0.448621	0.418	0.161	2.74628e-23	10
Ier2	9.39713e-57	0.448492	0.805	0.364	3.04965e-52	10
Tnfrsf1a	1.23244e-106	0.446858	0.709	0.166	3.99963e-102	10
Slc9a3r2	1.23549e-53	0.446403	0.67	0.302	4.00954e-49	10
1190002N15Rik	2.14025e-69	0.444896	0.567	0.179	6.94575e-65	10
Rpl41	5.67529e-77	0.444606	1	0.999	1.8418e-72	10
Tmed10	3.3881e-46	0.444083	0.966	0.817	1.09954e-41	10
Sepn1	2.60206e-97	0.443699	0.625	0.156	8.44448e-93	10
Hmg20b	4.03983e-74	0.443367	0.728	0.263	1.31105e-69	10
9430020K01Rik	0	0.442291	0.498	0.011	0	10
Cyb5r3	2.44502e-36	0.440762	0.854	0.65	7.93484e-32	10
Ginm1	7.53339e-64	0.44006	0.728	0.319	2.44481e-59	10
Chchd7	1.26243e-52	0.43995	0.797	0.445	4.09698e-48	10
Zic2	0	0.43955	0.51	0.021	0	10
Mgst1	1.64321e-194	0.439141	0.517	0.057	5.33271e-190	10
Lpp	3.74191e-82	0.436637	0.605	0.176	1.21436e-77	10
Flnc	0	0.435757	0.51	0.012	0	10
Hmgb1	3.82364e-30	0.433607	1	0.982	1.24089e-25	10
Hmgn1	5.13064e-31	0.433422	0.996	0.967	1.66505e-26	10
Ddit4	4.26803e-76	0.433198	0.582	0.175	1.3851e-71	10
Pcdh18	1.11287e-184	0.431324	0.54	0.07	3.61161e-180	10
Tmem123	4.37071e-173	0.430982	0.586	0.084	1.41843e-168	10
Yif1a	2.23258e-60	0.430688	0.716	0.318	7.24539e-56	10
Tom1l1	1.13152e-96	0.430393	0.556	0.129	3.67212e-92	10
Itm2c	7.27041e-30	0.43023	0.981	0.87	2.35946e-25	10
Ergic3	1.91487e-43	0.429889	0.977	0.888	6.21433e-39	10
Ctnna1	6.91425e-75	0.429518	0.674	0.235	2.24388e-70	10
2610001J05Rik	3.15844e-40	0.428836	0.812	0.55	1.02501e-35	10
Amotl1	5.21606e-69	0.428515	0.67	0.253	1.69277e-64	10
Rps13	2.4793e-75	0.426939	1	0.994	8.04608e-71	10
Jag1	1.16358e-135	0.426845	0.433	0.059	3.77617e-131	10
Smo	6.05095e-139	0.426342	0.67	0.13	1.96372e-134	10
Hdac1	2.55511e-46	0.426208	0.77	0.434	8.29209e-42	10
Rpl10a	1.18031e-62	0.426069	1	0.993	3.83047e-58	10
Sned1	8.09988e-206	0.425937	0.395	0.032	2.62865e-201	10
S100a13	1.41839e-101	0.425639	0.636	0.145	4.60309e-97	10
Rasl11b	8.65639e-195	0.424735	0.483	0.051	2.80926e-190	10
Arhgap28	8.8474e-292	0.423767	0.521	0.04	2.87125e-287	10
Ostf1	1.14552e-62	0.423531	0.851	0.37	3.71757e-58	10
Wisp1	0	0.422744	0.398	0.006	0	10
Capns1	7.67783e-42	0.422707	0.973	0.841	2.49169e-37	10
Rarres2	9.61146e-306	0.422669	0.414	0.022	3.11921e-301	10
Gabarap	4.2841e-67	0.420834	1	0.982	1.39032e-62	10
Rps3	2.30278e-71	0.420303	1	0.996	7.4732e-67	10
Klf4	2.10017e-31	0.419394	0.475	0.201	6.81569e-27	10
Tmem39a	6.37112e-124	0.418579	0.567	0.111	2.06762e-119	10
Zfyve21	4.7781e-114	0.417487	0.667	0.153	1.55064e-109	10
Anxa7	1.26168e-63	0.417115	0.621	0.233	4.09451e-59	10
Rps3a1	5.96868e-71	0.417072	1	0.995	1.93702e-66	10
Rps27a	5.09728e-74	0.416967	1	0.997	1.65422e-69	10
Dlc1	4.84142e-114	0.415594	0.605	0.142	1.57119e-109	10
P3h1	1.8257e-179	0.415233	0.494	0.059	5.92495e-175	10
Nkd2	1.38344e-102	0.414524	0.444	0.082	4.48968e-98	10
Foxf2	0	0.414066	0.479	0.006	0	10
Cks1b	5.40478e-35	0.413788	0.736	0.449	1.75401e-30	10
Zfos1	2.4377e-47	0.413294	0.858	0.406	7.91108e-43	10
Sec61b	1.1806e-41	0.412774	0.992	0.944	3.83139e-37	10
Dcdc2a	6.98975e-102	0.412296	0.452	0.086	2.26838e-97	10
Gprc5b	6.22621e-115	0.411449	0.406	0.06	2.02059e-110	10
Npr3	0	0.411419	0.36	0.009	0	10
Nes	4.55391e-139	0.410019	0.494	0.073	1.47788e-134	10
Tmed1	2.44498e-55	0.409612	0.762	0.39	7.93469e-51	10
Eif3f	9.07174e-54	0.407807	1	0.974	2.94405e-49	10
Pcbp2	1.57367e-52	0.407756	1	0.944	5.10703e-48	10
Idh2	9.08858e-42	0.407205	0.92	0.703	2.94952e-37	10
Rbpms	9.08132e-179	0.407201	0.548	0.074	2.94716e-174	10
Zyx	4.77768e-49	0.407013	0.72	0.363	1.5505e-44	10
Ddb1	1.39732e-39	0.406992	0.916	0.7	4.53474e-35	10
Fbln2	4.20693e-221	0.406955	0.375	0.026	1.36527e-216	10
Cd81	5.22706e-47	0.40533	0.996	0.931	1.69634e-42	10
Col9a1	8.4829e-165	0.405315	0.345	0.03	2.75295e-160	10
Chst14	0	0.403298	0.517	0.035	0	10
Lama4	0	0.403092	0.437	0.008	0	10
Hnrnpf	7.70379e-41	0.403079	0.989	0.872	2.50011e-36	10
Phldb2	0	0.403049	0.475	0.025	0	10
Rpl23a-ps3	1.49205e-51	0.402434	0.843	0.375	4.84216e-47	10
Psma4	6.56063e-41	0.401659	0.969	0.861	2.12912e-36	10
Itga11	0	0.401593	0.448	0.02	0	10
Eif1ax	1.79563e-32	0.400769	0.839	0.623	5.82737e-28	10
Rpl23	6.00246e-73	0.400694	1	0.997	1.94798e-68	10
Tpd52l1	1.99636e-39	0.400628	0.644	0.325	6.4788e-35	10
Stx4a	3.37072e-61	0.400133	0.693	0.287	1.0939e-56	10
Vcam1	4.34072e-205	0.399823	0.502	0.049	1.4087e-200	10
Plpp3	3.18747e-212	0.398685	0.843	0.155	1.03443e-207	10
Nradd	7.61994e-69	0.398623	0.621	0.205	2.4729e-64	10
Echdc2	7.7831e-296	0.398451	0.521	0.038	2.52585e-291	10
Mrc2	6.00644e-247	0.397984	0.467	0.037	1.94927e-242	10
P3h4	1.93014e-59	0.397907	0.674	0.284	6.26389e-55	10
Lrrc59	4.0207e-36	0.397078	0.858	0.617	1.30484e-31	10
Gadd45b	3.6467e-65	0.396826	0.628	0.189	1.18346e-60	10
Nedd4	5.25519e-42	0.396095	1	0.851	1.70547e-37	10
Rpl32	9.34924e-51	0.395495	1	0.994	3.03411e-46	10
Rpl37a	1.66116e-65	0.394119	1	0.997	5.39095e-61	10
Hbb-bh1	1.77025e-16	0.391173	0.28	0.114	5.74498e-12	10
Dkk3	5.14389e-149	0.391074	0.483	0.069	1.66935e-144	10
Rassf8	2.90152e-102	0.390543	0.563	0.132	9.41631e-98	10
Sidt1	4.38111e-89	0.389852	0.352	0.06	1.4218e-84	10
Fgfbp1	2.00174e-188	0.388424	0.107	0.001	6.49625e-184	10
Gm10837	0	0.388387	0.433	0.01	0	10
Lhfpl2	1.81821e-103	0.386498	0.552	0.118	5.90062e-99	10
Pvrl2	2.75698e-68	0.385427	0.579	0.173	8.94723e-64	10
Ptpn14	0	0.385377	0.471	0.018	0	10
Prelid1	6.97478e-29	0.385276	0.973	0.876	2.26352e-24	10
Plscr3	9.10924e-45	0.384873	0.713	0.367	2.95622e-40	10
Rpl34	4.53036e-62	0.384077	1	0.992	1.47024e-57	10
Hspa1a	1.29792e-27	0.384049	0.425	0.188	4.21212e-23	10
Hist1h2bc	2.40023e-32	0.383564	0.383	0.134	7.78945e-28	10
Srpx2	0	0.382474	0.352	0.003	0	10
Erp44	2.5346e-37	0.381918	0.762	0.462	8.22554e-33	10
Gstm2	0	0.380766	0.391	0.016	0	10
Hspg2	0	0.380509	0.398	0.013	0	10
Npm3	7.08224e-48	0.378831	0.755	0.389	2.2984e-43	10
Pdgfrl	0	0.377337	0.31	0.007	0	10
Nt5dc2	2.49823e-34	0.376493	0.862	0.574	8.1075e-30	10
Jun	2.0229e-28	0.376317	0.927	0.694	6.56491e-24	10
Ugp2	4.20249e-41	0.376068	0.724	0.417	1.36384e-36	10
A2m	0	0.376021	0.333	0.009	0	10
Anp32b	1.28358e-27	0.375985	0.946	0.826	4.16561e-23	10
Fermt2	5.20389e-62	0.375721	0.628	0.231	1.68882e-57	10
Pear1	0	0.374827	0.414	0.019	0	10
Lta4h	3.72733e-43	0.374087	0.586	0.26	1.20963e-38	10
Rspo3	7.7657e-144	0.373755	0.341	0.034	2.5202e-139	10
Utp11l	2.93989e-63	0.373646	0.644	0.218	9.54082e-59	10
Calr	7.71539e-23	0.373403	0.981	0.924	2.50388e-18	10
Myl6	6.0815e-37	0.372048	1	0.98	1.97363e-32	10
Frmd6	3.72857e-201	0.371753	0.483	0.051	1.21003e-196	10
Tmem261	2.04184e-54	0.371329	0.709	0.275	6.62639e-50	10
Crispld2	1.89469e-180	0.37059	0.356	0.03	6.14883e-176	10
Fth1	1.66638e-63	0.36929	1	0.996	5.40791e-59	10
Stra13	1.30518e-46	0.369109	0.686	0.283	4.23572e-42	10
Vwa1	2.12773e-32	0.367967	0.264	0.075	6.90512e-28	10
Wdr89	3.79924e-38	0.367294	0.912	0.624	1.23297e-33	10
Col4a6	0	0.366973	0.379	0.005	0	10
Chd7	1.82737e-33	0.366428	0.709	0.37	5.93035e-29	10
Limd2	2.0271e-30	0.366212	0.916	0.746	6.57854e-26	10
Tns1	9.6467e-117	0.365736	0.498	0.088	3.13064e-112	10
Bak1	2.67759e-42	0.365586	0.579	0.267	8.68957e-38	10
Postn	4.39483e-150	0.365517	0.284	0.022	1.42625e-145	10
Dock6	3.71244e-171	0.364775	0.467	0.056	1.2048e-166	10
Gltscr2	1.90758e-41	0.364674	0.793	0.368	6.19068e-37	10
Ccdc102a	0	0.364144	0.475	0.028	0	10
Sec11a	2.03145e-36	0.363856	0.966	0.815	6.59265e-32	10
Sar1a	1.31909e-36	0.3635	0.9	0.692	4.28086e-32	10
Ccdc8	2.57473e-154	0.363451	0.521	0.073	8.35576e-150	10
Lix1l	1.17957e-57	0.363338	0.644	0.249	3.82807e-53	10
Igf1	5.64298e-74	0.363045	0.375	0.071	1.83132e-69	10
Ephb4	0	0.362865	0.479	0.013	0	10
Scube1	1.16807e-109	0.362638	0.498	0.093	3.79074e-105	10
Rps11	2.88432e-55	0.361535	1	0.994	9.36047e-51	10
Bmp4	0	0.361025	0.364	0.009	0	10
Rps19	5.90127e-49	0.360807	1	0.994	1.91514e-44	10
Eef1g	4.95005e-31	0.360318	1	0.972	1.60644e-26	10
Zfp385a	1.3178e-45	0.360041	0.636	0.284	4.27665e-41	10
Nxn	6.05615e-37	0.360036	0.682	0.374	1.9654e-32	10
Rpl9	2.91667e-71	0.359885	1	0.997	9.46548e-67	10
Paics	1.1492e-31	0.359046	0.843	0.634	3.72949e-27	10
Apoa1bp	6.77276e-52	0.358955	0.766	0.311	2.19796e-47	10
Nucb1	4.15083e-35	0.357778	0.747	0.474	1.34707e-30	10
Lman1	5.75451e-42	0.35765	0.732	0.407	1.86751e-37	10
Dse	1.83564e-109	0.357477	0.521	0.102	5.95719e-105	10
Fut8	2.89741e-26	0.35742	0.659	0.399	9.40296e-22	10
Rest	1.26213e-116	0.357004	0.548	0.099	4.09599e-112	10
2700094K13Rik	3.16161e-28	0.356821	0.82	0.403	1.02604e-23	10
Mfsd10	7.29377e-50	0.356479	0.674	0.303	2.36705e-45	10
Tob1	7.40722e-26	0.356027	0.655	0.398	2.40387e-21	10
0610007P14Rik	2.24986e-57	0.355918	0.659	0.234	7.30148e-53	10
Slc39a1	1.11617e-27	0.355743	0.525	0.262	3.62232e-23	10
Slc50a1	8.92867e-43	0.35563	0.632	0.294	2.89762e-38	10
Hlf	5.65399e-91	0.355522	0.471	0.098	1.83489e-86	10
Igf2bp1	4.71141e-99	0.354838	0.598	0.134	1.52899e-94	10
Ddah2	9.02046e-37	0.354775	0.973	0.775	2.92741e-32	10
Smad3	4.7561e-161	0.353918	0.464	0.055	1.5435e-156	10
Tram1	9.7675e-44	0.353866	0.797	0.432	3.16985e-39	10
Rps12-ps3	5.59629e-48	0.353614	0.716	0.32	1.81616e-43	10
Fam20a	4.90281e-292	0.351927	0.429	0.025	1.59111e-287	10
Lamb2	8.0684e-157	0.350613	0.425	0.048	2.61844e-152	10
Col27a1	2.14065e-115	0.350597	0.467	0.074	6.94705e-111	10
Il13ra1	4.86011e-77	0.350375	0.502	0.125	1.57725e-72	10
Tsc22d1	2.61483e-19	0.350228	1	0.889	8.4859e-15	10
Plekhg2	6.09412e-110	0.349987	0.49	0.088	1.97773e-105	10
Adamts1	5.72761e-86	0.349925	0.379	0.068	1.85878e-81	10
Lamp2	3.20192e-45	0.349523	0.816	0.415	1.03912e-40	10
Egr1	4.9197e-22	0.349119	0.678	0.41	1.59659e-17	10
Gng12	2.20904e-64	0.348607	0.571	0.173	7.16901e-60	10
Loxl2	9.84187e-298	0.348428	0.464	0.029	3.19398e-293	10
Slc1a5	2.03687e-110	0.348374	0.425	0.068	6.61026e-106	10
Zfp536	1.47995e-85	0.348215	0.529	0.128	4.80287e-81	10
Qsox1	1.1621e-47	0.348015	0.525	0.197	3.77137e-43	10
Snx6	3.45759e-30	0.347249	0.931	0.741	1.12209e-25	10
Sec61g	5.27229e-43	0.347108	1	0.975	1.71102e-38	10
Pgd	2.62266e-33	0.346976	0.793	0.523	8.51131e-29	10
Obsl1	3.83525e-81	0.346956	0.487	0.119	1.24465e-76	10
Pon2	2.59677e-51	0.34682	0.659	0.256	8.42729e-47	10
Actn4	1.94885e-36	0.346758	0.693	0.384	6.32459e-32	10
Rpl24	2.38065e-58	0.346674	1	0.994	7.72593e-54	10
Tpt1	4.41033e-61	0.346353	1	0.996	1.43128e-56	10
Gm10076	8.29824e-35	0.346006	0.977	0.854	2.69303e-30	10
Bola3	2.90096e-39	0.34568	0.739	0.4	9.41447e-35	10
Ftl1	4.30297e-40	0.345654	1	0.996	1.39644e-35	10
Nfia	2.44482e-54	0.344994	0.559	0.177	7.93418e-50	10
Sfr1	1.88316e-29	0.344907	0.946	0.83	6.11143e-25	10
Etfa	1.27944e-44	0.344645	0.751	0.389	4.15216e-40	10
Fblim1	1.9272e-69	0.343925	0.54	0.15	6.25435e-65	10
Pdia3	4.894e-25	0.343887	0.958	0.881	1.58825e-20	10
Naca	1.13304e-55	0.343765	1	0.99	3.67704e-51	10
Fam84a	1.86255e-56	0.343465	0.494	0.157	6.04453e-52	10
Agpat2	7.58787e-195	0.343043	0.475	0.049	2.46249e-190	10
Marc2	1.22187e-29	0.342319	0.747	0.48	3.96534e-25	10
Itgb1	1.71496e-25	0.341305	0.874	0.661	5.56554e-21	10
Tgfbr2	5.29329e-76	0.341108	0.54	0.13	1.71783e-71	10
Coro1b	9.92314e-38	0.340963	0.782	0.432	3.22036e-33	10
Hspb11	8.50124e-41	0.340669	0.732	0.402	2.75891e-36	10
Fam132a	1.69507e-140	0.340525	0.448	0.06	5.501e-136	10
Chsy1	9.60086e-74	0.339573	0.529	0.145	3.11577e-69	10
Fam43a	4.74958e-212	0.339403	0.402	0.032	1.54138e-207	10
Nme4	1.77037e-70	0.338754	0.521	0.144	5.74538e-66	10
Srp54b	2.14288e-37	0.338271	0.751	0.337	6.9543e-33	10
Ptpn13	7.5014e-160	0.338233	0.425	0.048	2.43443e-155	10
Gbas	3.7781e-54	0.33815	0.632	0.227	1.22611e-49	10
Tbrg1	6.77185e-23	0.337965	0.824	0.634	2.19767e-18	10
Nfib	1.28447e-103	0.337885	0.609	0.128	4.1685e-99	10
Cdc16	1.70214e-28	0.33752	0.782	0.551	5.52396e-24	10
Fabp5	9.68592e-13	0.336539	0.973	0.931	3.14337e-08	10
Msrb1	9.85683e-40	0.336015	0.674	0.345	3.19884e-35	10
Pdk3	2.26189e-87	0.335258	0.49	0.111	7.34052e-83	10
1810043H04Rik	2.12973e-67	0.334828	0.582	0.171	6.91163e-63	10
Rpn2	4.62419e-20	0.334465	0.885	0.76	1.50069e-15	10
Hebp2	3.94843e-50	0.334411	0.54	0.21	1.28138e-45	10
Fbln5	8.08545e-307	0.333064	0.234	0.005	2.62397e-302	10
Sec24d	2.02319e-86	0.332868	0.498	0.119	6.56586e-82	10
Pabpc1	4.33937e-29	0.332651	0.973	0.939	1.40826e-24	10
Zcchc3	1.92834e-37	0.33218	0.602	0.283	6.25805e-33	10
Iah1	3.36785e-49	0.331639	0.621	0.256	1.09297e-44	10
C1qtnf6	1.25655e-254	0.331264	0.421	0.029	4.0779e-250	10
Fhl2	2.26034e-12	0.330122	0.284	0.148	7.33549e-08	10
S1pr2	5.30901e-135	0.329645	0.46	0.065	1.72293e-130	10
Oat	1.74558e-30	0.329638	0.72	0.449	5.66492e-26	10
Il34	3.94878e-88	0.328716	0.291	0.041	1.2815e-83	10
Hmbs	4.07075e-36	0.328714	0.659	0.358	1.32108e-31	10
2810417H13Rik	9.39058e-83	0.328347	0.222	0.024	3.04752e-78	10
Btf3	1.41466e-44	0.328344	1	0.989	4.591e-40	10
Laptm4b	1.30155e-48	0.328056	0.552	0.206	4.22391e-44	10
Wfikkn2	0	0.327171	0.322	0.007	0	10
Crispld1	8.71018e-150	0.327136	0.418	0.05	2.82671e-145	10
Eif4e2	6.88262e-28	0.326921	0.851	0.657	2.23362e-23	10
Creb3l2	3.97273e-132	0.32674	0.46	0.066	1.28927e-127	10
Magt1	2.08732e-54	0.326617	0.575	0.198	6.77398e-50	10
Golim4	3.65171e-88	0.326306	0.517	0.117	1.18509e-83	10
Ppp4c	9.62857e-31	0.326148	0.9	0.742	3.12476e-26	10
Suclg2	5.34569e-60	0.325693	0.529	0.163	1.73484e-55	10
Mrgprf	0	0.325629	0.322	0.003	0	10
Rpl21	6.28426e-55	0.32533	1	0.995	2.03943e-50	10
Frem1	3.63937e-269	0.325079	0.364	0.019	1.18109e-264	10
Csrp1	2.5545e-82	0.324952	0.49	0.109	8.29013e-78	10
Akr7a5	2.40816e-27	0.324726	0.755	0.504	7.81519e-23	10
Arf4	3.03452e-31	0.324707	0.996	0.934	9.84794e-27	10
Sdf4	1.91388e-26	0.324558	0.877	0.674	6.21113e-22	10
Gm9843	1.30903e-44	0.324477	0.851	0.387	4.24819e-40	10
Tnfaip8	1.95338e-83	0.323995	0.571	0.134	6.33931e-79	10
Tmed9	2.45611e-28	0.32345	0.935	0.797	7.97081e-24	10
Siah2	3.67111e-25	0.323101	0.617	0.373	1.19138e-20	10
Enpp1	3.03005e-107	0.322758	0.322	0.041	9.83343e-103	10
Cd164	9.01548e-46	0.322595	0.697	0.301	2.92579e-41	10
Casp6	3.73491e-78	0.322527	0.552	0.141	1.21209e-73	10
Sepw1	2.69636e-18	0.322261	0.939	0.457	8.75051e-14	10
Rpl7a	4.09076e-43	0.32214	1	0.989	1.32757e-38	10
Nr2f6	6.47044e-29	0.320088	0.716	0.458	2.09985e-24	10
P2ry1	3.33006e-135	0.319654	0.414	0.055	1.08071e-130	10
Gm14964	1.07988e-107	0.319622	0.333	0.042	3.50454e-103	10
Nudcd2	6.60964e-28	0.319224	0.77	0.528	2.14503e-23	10
Bad	1.4769e-22	0.319162	0.843	0.657	4.79297e-18	10
Eif3e	1.43234e-29	0.319104	0.981	0.932	4.64837e-25	10
Rps2	3.32641e-39	0.318947	1	0.997	1.07952e-34	10
Txn1	1.2807e-18	0.318885	0.992	0.914	4.15626e-14	10
Bmpr1a	8.89586e-43	0.318622	0.613	0.285	2.88697e-38	10
Rpl3	2.95921e-51	0.318467	1	0.996	9.60354e-47	10
Gga2	2.08622e-31	0.318448	0.651	0.378	6.7704e-27	10
Hspb1	2.10316e-52	0.318313	0.218	0.037	6.82539e-48	10
Tmem9	6.78513e-28	0.317242	0.897	0.653	2.20198e-23	10
Myadm	9.2487e-30	0.316942	0.579	0.316	3.00148e-25	10
Eif3m	5.46268e-24	0.316167	0.916	0.813	1.7728e-19	10
Yipf3	1.74394e-26	0.315719	0.789	0.555	5.65961e-22	10
Cdc26	4.2864e-28	0.315641	0.904	0.735	1.39107e-23	10
Rarb	7.05308e-79	0.31541	0.375	0.073	2.28894e-74	10
Atp5d	9.08488e-42	0.31539	1	0.966	2.94832e-37	10
Trim62	6.63286e-31	0.315341	0.494	0.23	2.15256e-26	10
Arhgap31	7.7611e-82	0.314993	0.575	0.144	2.51871e-77	10
Crabp2	2.1047e-28	0.314733	0.46	0.188	6.83039e-24	10
Plod2	3.41147e-67	0.314394	0.475	0.129	1.10712e-62	10
Cgnl1	0	0.313673	0.391	0.012	0	10
Eef1a1	3.16363e-46	0.313583	1	0.999	1.02669e-41	10
Trp53i13	1.34426e-84	0.313473	0.506	0.118	4.36253e-80	10
Rps7	5.36743e-47	0.31299	1	0.995	1.74189e-42	10
Pcbp1	1.08101e-29	0.3128	0.989	0.944	3.5082e-25	10
Josd2	1.68391e-32	0.312664	0.648	0.36	5.46481e-28	10
Ext2	1.18709e-25	0.312349	0.705	0.481	3.85246e-21	10
Efna4	1.93287e-175	0.311891	0.448	0.048	6.27274e-171	10
Copb2	4.35313e-20	0.311698	0.747	0.534	1.41272e-15	10
Tns2	0	0.311609	0.406	0.016	0	10
Rps29	4.26353e-51	0.311539	1	0.997	1.38364e-46	10
Sptbn1	2.49538e-21	0.311336	0.977	0.774	8.09825e-17	10
Snx21	1.22732e-23	0.310728	0.567	0.337	3.98303e-19	10
Slc35a1	3.84739e-33	0.310519	0.663	0.373	1.24859e-28	10
Rell1	8.9458e-83	0.310226	0.383	0.071	2.90318e-78	10
Clec3b	4.70981e-37	0.310078	0.146	0.023	1.52848e-32	10
Fam212a	5.47028e-45	0.310064	0.521	0.179	1.77527e-40	10
Bcl2l12	2.70927e-102	0.310049	0.46	0.08	8.79241e-98	10
Fzd6	0	0.309162	0.352	0.013	0	10
Iqgap1	6.98726e-49	0.308906	0.559	0.214	2.26757e-44	10
Ptgr1	1.21913e-177	0.308353	0.398	0.037	3.95643e-173	10
Stt3a	1.40057e-28	0.308007	0.701	0.441	4.54528e-24	10
Rpl11	8.34536e-48	0.307944	1	0.996	2.70832e-43	10
Snap23	3.77324e-59	0.307646	0.548	0.169	1.22453e-54	10
Tmem37	4.52149e-93	0.307372	0.46	0.084	1.46736e-88	10
Cox4i1	6.21644e-42	0.307337	1	0.993	2.01742e-37	10
Nudt21	1.02297e-24	0.307295	0.904	0.742	3.31986e-20	10
Fam20c	3.72965e-13	0.307155	0.609	0.464	1.21038e-08	10
Shisa5	8.41201e-29	0.306667	0.728	0.46	2.72995e-24	10
Spr	3.14635e-50	0.305485	0.525	0.187	1.02108e-45	10
Abca1	5.08401e-56	0.305473	0.567	0.169	1.64992e-51	10
Lamtor3	1.9116e-22	0.305332	0.835	0.636	6.20371e-18	10
Antxr1	7.10505e-211	0.305295	0.402	0.032	2.3058e-206	10
Tgfbr3	2.59429e-164	0.30441	0.372	0.036	8.41925e-160	10
l7Rn6	7.8802e-42	0.304385	0.72	0.304	2.55736e-37	10
Wbscr22	5.49879e-57	0.30425	0.506	0.152	1.78452e-52	10
Atp5b	2.04497e-26	0.304124	0.992	0.979	6.63655e-22	10
Tle3	3.87299e-52	0.303728	0.579	0.195	1.2569e-47	10
Pttg1ip	1.40953e-31	0.303593	0.701	0.4	4.57436e-27	10
Gxylt2	0	0.303563	0.364	0.015	0	10
Foxp2	6.45781e-74	0.30239	0.59	0.155	2.09575e-69	10
Anpep	0	0.302154	0.349	0.006	0	10
Col16a1	1.76231e-157	0.300983	0.36	0.035	5.71924e-153	10
Pddc1	1.6767e-44	0.300267	0.582	0.219	5.44141e-40	10
Fdx1	1.55596e-29	0.299964	0.663	0.387	5.04956e-25	10
Ccdc109b	1.45488e-117	0.299533	0.307	0.033	4.72154e-113	10
Pdpn	6.63883e-116	0.297882	0.314	0.035	2.1545e-111	10
Fosb	7.0922e-05	0.297288	0.498	0.401	1	10
Foxq1	0	0.296517	0.268	0.004	0	10
Nfic	1.20085e-32	0.296189	0.571	0.268	3.89713e-28	10
Socs3	2.21326e-17	0.29581	0.467	0.249	7.18268e-13	10
Rps28	1.59324e-39	0.295602	1	0.991	5.17053e-35	10
Hmgn2	3.44059e-08	0.295329	0.946	0.9	0.00111658	10
Anapc11	5.0105e-29	0.29488	0.969	0.843	1.62606e-24	10
Fat1	2.97153e-48	0.294855	0.51	0.174	9.64351e-44	10
Tcf7	0	0.294776	0.352	0.012	0	10
Tmem242	4.09359e-30	0.294415	0.743	0.46	1.32849e-25	10
Tex264	9.72758e-26	0.293944	0.755	0.496	3.15689e-21	10
Cryz	2.89207e-55	0.293767	0.421	0.117	9.38563e-51	10
Hadha	9.04839e-29	0.29297	0.724	0.448	2.93647e-24	10
Vamp3	6.19174e-28	0.292222	0.739	0.465	2.0094e-23	10
Ndufa13	2.28805e-24	0.291758	0.996	0.962	7.4254e-20	10
Rpa3	2.8892e-37	0.290884	0.617	0.288	9.37631e-33	10
Cd151	3.55513e-28	0.290236	0.582	0.303	1.15375e-23	10
Yipf5	4.82842e-22	0.290063	0.755	0.542	1.56697e-17	10
Zfp36l2	3.61236e-64	0.289225	0.793	0.277	1.17232e-59	10
Frzb	5.01834e-133	0.288868	0.326	0.033	1.6286e-128	10
Prkd3	3.4064e-86	0.288836	0.483	0.101	1.10548e-81	10
Nfatc4	0	0.288085	0.395	0.016	0	10
Adgra2	0	0.287321	0.364	0.01	0	10
Rpl18	1.64023e-47	0.287284	1	0.996	5.32305e-43	10
Hmga2	9.25693e-91	0.28718	0.199	0.018	3.00415e-86	10
Wnt9a	2.00843e-298	0.287142	0.314	0.012	6.51795e-294	10
Acaa1a	1.84386e-22	0.287128	0.805	0.615	5.98389e-18	10
Lsm2	7.15558e-21	0.286755	0.774	0.599	2.3222e-16	10
Dnpep	2.68118e-24	0.286677	0.778	0.54	8.70123e-20	10
Errfi1	4.82255e-17	0.286582	0.414	0.226	1.56506e-12	10
Lef1	2.80717e-99	0.286238	0.448	0.078	9.1101e-95	10
Fam101a	4.88345e-247	0.286139	0.341	0.018	1.58482e-242	10
Dennd2a	7.99919e-35	0.28604	0.54	0.249	2.59598e-30	10
Sec61a1	1.42106e-26	0.285187	0.766	0.519	4.61176e-22	10
Srgn	1.68058e-56	0.284556	0.352	0.077	5.45398e-52	10
Timp1	0	0.284349	0.341	0.01	0	10
Peli2	3.84572e-67	0.284095	0.452	0.111	1.24805e-62	10
Rpl10-ps3	2.29505e-43	0.283981	0.889	0.518	7.44814e-39	10
Cdc37	7.3162e-25	0.283793	0.946	0.816	2.37433e-20	10
Thbs4	5.72623e-279	0.283497	0.23	0.006	1.85833e-274	10
Cops6	7.07369e-21	0.283345	0.931	0.789	2.29562e-16	10
Gypc	0	0.283178	0.383	0.016	0	10
Wnt5a	1.65618e-53	0.282836	0.433	0.126	5.3748e-49	10
Pttg1	8.80659e-39	0.282486	0.59	0.263	2.858e-34	10
2810428I15Rik	2.56128e-30	0.281839	0.778	0.372	8.31213e-26	10
Uqcrc1	6.96649e-19	0.281837	0.935	0.862	2.26083e-14	10
Fgfr2	2.84163e-80	0.281651	0.349	0.061	9.22194e-76	10
Toporsos	4.74055e-92	0.281634	0.425	0.076	1.53845e-87	10
Fdx1l	2.73302e-38	0.281605	0.628	0.261	8.86948e-34	10
Wnk4	3.2894e-232	0.281446	0.31	0.016	1.06751e-227	10
Ldha	2.61178e-13	0.281407	0.912	0.796	8.47602e-09	10
Snrpb	1.71129e-22	0.281346	0.981	0.922	5.55364e-18	10
Gatm	4.70494e-19	0.28122	0.567	0.333	1.52689e-14	10
Ctgf	4.07277e-61	0.281074	0.107	0.008	1.32174e-56	10
Zeb1	1.71208e-24	0.280405	0.667	0.423	5.55622e-20	10
Cope	3.02428e-18	0.279771	0.908	0.788	9.81468e-14	10
Fgfr1	1.04888e-23	0.279682	0.582	0.334	3.40393e-19	10
Plekhg1	4.79283e-126	0.279673	0.36	0.043	1.55542e-121	10
Smoc1	7.32264e-25	0.278956	0.284	0.102	2.37642e-20	10
Itsn1	5.78374e-20	0.278786	0.636	0.415	1.877e-15	10
Amotl2	6.59499e-33	0.278743	0.475	0.196	2.14027e-28	10
Wfdc1	5.69299e-109	0.278515	0.261	0.026	1.84755e-104	10
Hexim1	3.28708e-28	0.278032	0.582	0.314	1.06676e-23	10
Emg1	2.33911e-24	0.277991	0.854	0.667	7.59113e-20	10
Mpv17	6.31735e-27	0.277927	0.713	0.444	2.05017e-22	10
Foxo1	1.45104e-50	0.277758	0.414	0.119	4.70907e-46	10
Armcx2	6.81087e-21	0.277385	0.87	0.651	2.21033e-16	10
Slc35a4	5.03978e-36	0.277351	0.582	0.273	1.63556e-31	10
Scara5	0	0.277028	0.276	0.004	0	10
Lima1	1.37811e-65	0.276765	0.402	0.092	4.47237e-61	10
Map2k3	4.44967e-51	0.276728	0.517	0.173	1.44405e-46	10
Adamts10	1.6829e-40	0.276086	0.452	0.167	5.4615e-36	10
Stk39	2.8179e-17	0.275228	0.567	0.36	9.14493e-13	10
Rnf26	1.31919e-36	0.275022	0.483	0.196	4.28116e-32	10
Lrrk1	5.54516e-135	0.275003	0.372	0.042	1.79957e-130	10
Nab2	3.48731e-69	0.274906	0.429	0.099	1.13174e-64	10
Sh3d19	1.61073e-63	0.274664	0.379	0.089	5.22729e-59	10
Glo1	8.59219e-22	0.27448	0.877	0.672	2.78842e-17	10
Triobp	1.74458e-48	0.274318	0.498	0.168	5.6617e-44	10
Arf5	2.35154e-31	0.273559	0.992	0.979	7.63144e-27	10
Bckdk	5.25544e-23	0.273367	0.648	0.414	1.70555e-18	10
Col2a1	2.02259e-65	0.273008	0.372	0.079	6.56393e-61	10
Gorasp2	2.35906e-18	0.272966	0.755	0.58	7.65585e-14	10
Rab22a	2.90579e-21	0.272052	0.686	0.473	9.43015e-17	10
Carnmt1	5.54799e-38	0.271922	0.533	0.23	1.80049e-33	10
Apoa2	5.96895e-49	0.271777	0.368	0.104	1.9371e-44	10
Tpm3-rs7	1.51768e-15	0.271657	0.613	0.417	4.92532e-11	10
Ssr1	5.54337e-20	0.27164	0.881	0.721	1.79899e-15	10
Lzts2	4.76475e-33	0.271314	0.621	0.316	1.5463e-28	10
Reck	1.126e-109	0.270332	0.364	0.051	3.65422e-105	10
Sec31a	1.82843e-23	0.270214	0.67	0.429	5.93379e-19	10
Slc39a7	8.75473e-20	0.269998	0.789	0.61	2.84117e-15	10
Rbms3	1.75992e-25	0.269345	0.586	0.317	5.71148e-21	10
Rpl36al	6.88738e-22	0.268344	0.989	0.94	2.23516e-17	10
Prkrir	1.95066e-55	0.267723	0.467	0.133	6.33049e-51	10
Tanc1	4.8977e-129	0.267672	0.368	0.044	1.58945e-124	10
Carkd	1.37187e-37	0.267449	0.605	0.246	4.45212e-33	10
Cnih1	2.85284e-21	0.26718	0.92	0.769	9.25833e-17	10
Cox6b2	2.63306e-43	0.267003	0.406	0.132	8.54506e-39	10
Fam96a	5.87023e-22	0.26668	0.881	0.717	1.90507e-17	10
Gab1	4.24446e-44	0.266391	0.402	0.123	1.37746e-39	10
Elavl1	8.62186e-19	0.26635	0.812	0.646	2.79805e-14	10
Rpl35	3.15525e-33	0.26614	1	0.988	1.02397e-28	10
Cmc2	1.92408e-24	0.266045	0.567	0.33	6.24422e-20	10
Zfp362	2.31764e-30	0.265446	0.548	0.273	7.52144e-26	10
Pald1	1.90484e-48	0.265172	0.498	0.158	6.18178e-44	10
Rfc1	5.93809e-27	0.265153	0.594	0.329	1.92709e-22	10
Ebpl	8.47076e-24	0.26502	0.797	0.542	2.74902e-19	10
Mbtps1	1.50509e-23	0.264652	0.648	0.393	4.88446e-19	10
Chmp4b	8.67275e-21	0.264207	0.943	0.829	2.81457e-16	10
Rnh1	4.54025e-25	0.264072	0.762	0.494	1.47345e-20	10
Slc35b2	6.8744e-26	0.263887	0.602	0.329	2.23095e-21	10
Npc2	4.77252e-40	0.26379	0.992	0.838	1.54883e-35	10
Dynll1	5.5314e-20	0.2637	1	0.969	1.79511e-15	10
Rarg	1.46019e-265	0.262989	0.318	0.014	4.73877e-261	10
Uqcrh	5.82417e-31	0.262881	1	0.979	1.89012e-26	10
Igf2bp2	2.51675e-45	0.262682	0.506	0.175	8.16761e-41	10
Anapc13	2.76058e-19	0.262619	0.935	0.762	8.9589e-15	10
Sumf2	2.70684e-23	0.261864	0.51	0.283	8.7845e-19	10
Ifi27	8.82631e-13	0.261707	0.395	0.218	2.8644e-08	10
Heg1	2.4145e-192	0.261613	0.352	0.027	7.83577e-188	10
Efemp1	3.97149e-203	0.261245	0.241	0.011	1.28887e-198	10
Slc25a24	2.48433e-63	0.260991	0.391	0.093	8.06239e-59	10
Kit	3.83905e-75	0.260429	0.391	0.079	1.24589e-70	10
Gprc5c	4.52782e-263	0.260117	0.345	0.018	1.46941e-258	10
Clcn2	1.99379e-28	0.259391	0.433	0.191	6.47045e-24	10
Slc7a5	3.7826e-10	0.25936	0.36	0.234	1.22757e-05	10
Wdr61	2.29653e-22	0.259064	0.728	0.512	7.45294e-18	10
Lage3	5.65753e-24	0.258983	0.755	0.513	1.83604e-19	10
Nkx6-1	1.31445e-277	0.258645	0.356	0.017	4.26578e-273	10
Il6st	1.4082e-23	0.258401	0.506	0.26	4.57004e-19	10
9430016H08Rik	1.02631e-43	0.258295	0.517	0.181	3.33068e-39	10
Fkbp14	2.11337e-41	0.257795	0.452	0.163	6.85851e-37	10
Dbi	1.55154e-44	0.257635	0.927	0.732	5.03522e-40	10
Slc35f5	4.46502e-31	0.257572	0.54	0.261	1.44903e-26	10
Hyal2	8.5162e-25	0.256232	0.655	0.381	2.76376e-20	10
Rcsd1	3.62138e-66	0.256161	0.54	0.136	1.17525e-61	10
Dpm3	1.71736e-18	0.256082	0.858	0.657	5.57336e-14	10
Ppfibp1	2.57524e-48	0.256054	0.456	0.152	8.35742e-44	10
Rpl22l1	9.24554e-20	0.255989	1	0.979	3.00046e-15	10
Cers5	1.61574e-19	0.25582	0.659	0.452	5.24357e-15	10
Trp53	6.0522e-22	0.255657	0.743	0.509	1.96412e-17	10
Dhrs4	1.45386e-37	0.254958	0.464	0.175	4.71823e-33	10
Slc29a1	3.64099e-22	0.254628	0.433	0.199	1.18161e-17	10
Mkks	8.45931e-40	0.25437	0.563	0.233	2.7453e-35	10
Tnc	6.27016e-148	0.254323	0.215	0.012	2.03485e-143	10
Gulp1	2.5053e-178	0.254036	0.368	0.031	8.13044e-174	10
Mob3b	2.92162e-124	0.253893	0.326	0.036	9.48154e-120	10
Stx5a	2.67041e-20	0.253802	0.736	0.517	8.6663e-16	10
Degs1	5.85794e-16	0.253699	0.648	0.456	1.90108e-11	10
Mif4gd	3.81901e-52	0.253652	0.464	0.138	1.23938e-47	10
Limd1	1.70837e-42	0.253617	0.483	0.175	5.54418e-38	10
Cnih4	2.67022e-28	0.252685	0.659	0.363	8.66565e-24	10
Minos1	4.38291e-13	0.252647	0.992	0.943	1.42239e-08	10
Tmem256	1.04405e-18	0.252288	0.95	0.849	3.38825e-14	10
Marveld1	2.07592e-87	0.251413	0.379	0.067	6.73698e-83	10
Slc31a1	7.50107e-21	0.250265	0.548	0.316	2.43432e-16	10
Decr1	9.1291e-38	0.250132	0.502	0.203	2.96267e-33	10

[truncated: 1 more sheets: Astrocytes]
