# Supplementary material for: Developmental single-cell transcriptomics of hypothalamic POMC neurons reveal the genetic trajectories of multiple neuropeptidergic phenotypes
Source: eLife. 2022 Jan 19;11:e72883. doi: 10.7554/eLife.72883 (PMC8806186; doi:10.7554/eLife.72883)
Supplement: Figure 2—source data 2. — Pomc(med)/Nr4a2 and the two subclusters 2–1 and 2–2 derived from reclustering of cluster 2. Pomc(med)/Ebf1 (corresponding to Figure 2G, cluster 2 and Figure 2—figure supplement 1, cluster 3). [file elife-72883-fig2-data2.xlsx]

## Sheet: Cluster 3
Figure 2 - Source Data 2 (corresponding to Figure2-figure supplement 1, cluster 3). Average gene expression [exp(logNormalized counts)-1)]
obtained from the Seurat analysis of the two subclusters 3-1 and 3-2 derived from reclustering of Cluster 3. Pomc(med)/Nr4a2
Gene expression data are sorted based on highest to lowest for subcluster 3-1 starting with Malat1
Subcluster:	3-1	3-2
Gene
Malat1	4.95189	5.84217
Tuba1a	4.7927	2.7995
mt-Atp6	4.65786	5.20764
Tmsb10	4.56721	2.24441
mt-Co3	4.26713	4.7392
Meg3	4.26156	5.63773
Tubb2b	4.2217	1.95232
Stmn1	4.11043	2.23555
mt-Cytb	4.03666	4.52225
Tmsb4x	4.01408	2.79407
mt-Co2	4.01068	4.69345
mt-Co1	3.95118	4.46086
Actb	3.88069	2.80633
Nnat	3.86751	2.34806
Rtn1	3.86404	3.42583
Tubb5	3.84303	2.05082
Actg1	3.80978	2.38566
Eef1a1	3.73336	2.25425
Ubb	3.62419	3.0499
Ppia	3.54938	2.35839
Stmn2	3.54148	2.88218
Tubb3	3.49376	1.84205
Ptma	3.47546	1.89241
mt-Nd1	3.46228	3.14523
Rpl41	3.43086	2.0687
Basp1	3.38989	2.41231
Ftl1	3.35754	1.5963
Hspa8	3.29804	2.4394
mt-Nd4	3.27543	3.53342
Gap43	3.22036	1.84666
Stmn3	3.21294	3.11241
H3f3a	3.19687	1.38233
Tubb2a	3.19524	2.52254
Gnas	3.18251	2.90858
Calm2	3.16127	2.19123
H3f3b	3.15646	1.92173
Pcsk1n	3.14502	2.82416
Hsp90ab1	3.07748	2.28135
Ly6h	3.01364	3.34277
Marcksl1	3.00444	1.55531
Map1b	2.95674	2.27487
Cfl1	2.91157	1.5942
mt-Nd2	2.90738	3.52658
Calm1	2.90513	2.03598
Rps29	2.8853	1.73261
Rps2	2.86674	1.7657
Rpl13	2.8574	1.8398
Gapdh	2.8564	2.23475
Rpsa	2.83631	1.64719
Ybx1	2.77907	1.24408
Rps24	2.7781	1.80691
Snhg11	2.77291	4.81225
Rpl37a	2.75983	1.58976
Rplp0	2.75224	1.32691
Mllt11	2.75185	1.36798
Rps27a	2.75023	1.67654
Uchl1	2.74198	2.11523
Eif1	2.73684	1.83906
Fth1	2.73299	1.79611
Rpl3	2.72813	1.62442
Slc25a4	2.71969	1.81666
Rps19	2.70484	1.18695
Rpl37	2.68996	1.55094
Ywhae	2.68131	1.61384
Rpl38	2.67859	1.37354
Rps8	2.67854	1.24891
Fau	2.67845	1.67196
Rpl6	2.67506	1.56478
Tpt1	2.67428	1.64183
Rpl23	2.67224	1.78397
Rps7	2.67073	1.33828
Rpl19	2.67012	1.76585
Rpl21	2.65738	1.4368
Bex2	2.64764	2.32295
Snrpn	2.63852	1.50005
Rpl9	2.63335	1.76089
Rpl11	2.6313	1.50156
Ptms	2.63071	1.50333
Rps5	2.62811	1.22729
Rpl39	2.62453	1.23248
Chchd2	2.62136	1.67852
Mapt	2.61469	1.60667
Eef2	2.60177	1.61107
Rpl32	2.59874	1.4008
Sumo2	2.57879	1.35285
Ttc3	2.57777	2.73792
Ndufa4	2.56696	1.98282
Rps4x	2.55937	1.56282
Hint1	2.55466	1.49199
Nsg1	2.55089	2.15241
Fxyd6	2.53855	2.33297
Rpl27a	2.53029	1.65058
Gm1673	2.52666	1.7213
Cox8a	2.52536	1.65973
Rps15a	2.5229	1.33954
Rpl8	2.51565	1.52648
Selenow	2.51559	1.44366
Rpl10	2.51305	1.10001
Rpl18a	2.50721	1.3689
Rps3a1	2.50594	1.4528
Pfn2	2.50133	1.22572
Fabp5	2.4965	1.47111
Rps3	2.49087	1.46919
Calm3	2.47963	1.60448
Dpysl2	2.47488	1.54134
Rps11	2.47336	1.4546
Rps13	2.46651	1.50342
Rplp1	2.46635	1.51022
Atpif1	2.46535	1.46391
Ywhaq	2.46302	1.45027
Rps27	2.45834	1.38232
Pebp1	2.45499	1.46485
Prdx2	2.45398	1.44442
Rps18	2.45339	1.20864
Rps23	2.43447	1.11721
Rpl14	2.43301	1.05204
Rps16	2.42944	1.15876
Hsp90aa1	2.42605	2.15263
Ncam1	2.42492	2.88845
Rplp2	2.41738	1.07016
Ywhah	2.41689	2.00681
Rps9	2.41656	1.3292
Rpl26	2.41213	1.31698
Rpl36	2.40754	1.39511
Cd24a	2.39711	0.268068
Snca	2.3967	0.629518
Rps14	2.39408	1.17819
Rpl29	2.39332	1.09036
Nap1l5	2.39096	2.70069
Tuba1b	2.38419	1.51345
Dynll1	2.38202	1.47131
Rpl17	2.38042	0.938447
Rpl35a	2.37605	1.52767
Atp5e	2.37482	1.1916
Rpl15	2.37436	1.64175
Rpl24	2.37303	1.31348
Rpl35	2.36532	1.02323
Gng3	2.3645	1.47422
6330403K07Rik	2.36048	1.79436
Gnb1	2.3549	1.57067
Ndn	2.35066	2.77642
Cox4i1	2.34879	1.44496
Cox6c	2.34148	1.14852
Rps10	2.31655	1.4266
Cox7c	2.31345	1.29257
Oaz1	2.31183	1.73386
Cnih2	2.30069	0.993933
Cox5a	2.2953	1.20987
Rps28	2.29137	1.20143
Cox6b1	2.28869	1.07061
Rpl34	2.28545	1.22103
Map1lc3a	2.27345	1.36076
Rpl13a	2.27142	0.183281
Rps26	2.27139	0.91111
Atp5g1	2.26425	1.36475
Celf4	2.26245	2.27776
Marcks	2.25865	1.56733
Gnb2	2.25678	1.61727
Rps20	2.25529	1.3846
Rpl22l1	2.25517	1.49841
Rpl7	2.25321	1.00581
Rps6	2.22889	0.894082
Hmgb1	2.22857	1.05477
Pgrmc1	2.22519	2.70197
Rpl4	2.22229	1.01379
Rpl18	2.22171	1.70501
Rpl28	2.21284	1.15591
Eif4g2	2.20985	1.27835
Sepw1	2.2073	0
Rpl31	2.20707	0.874249
Rps21	2.19349	1.24696
Atp5b	2.18129	1.45565
Nme1	2.18112	1.21506
Rnf187	2.1806	1.09316
Dpysl3	2.17461	0.970927
Rpl30	2.16927	1.47108
Hn1	2.16812	0
Hsbp1	2.1674	1.28093
Atp1b1	2.1636	2.79251
Mif	2.15792	0.955233
Zwint	2.15032	1.85627
Cox5b	2.1454	1.09347
H2afz	2.14376	1.69813
Rpl10a	2.14235	1.57787
Stmn4	2.12617	2.00733
Naca	2.12436	1.06167
Rab3a	2.12323	1.97699
Rps17	2.12282	0.916379
Cox7a2	2.12195	1.06749
Tecr	2.1147	2.66557
Rac3	2.11227	1.40729
Atp5l	2.11214	1.14296
Atp5j2	2.10299	1.14776
Atp5g3	2.09662	1.09321
Thra	2.0913	1.31743
Cdc42	2.08881	1.3093
Hnrnpa1	2.08757	1.03733
Bex3	2.08722	2.04068
Tsc22d1	2.07805	1.71434
Eif4a1	2.0729	1.25947
Aplp1	2.07267	2.02327
Nr4a2	2.0675	0.369705
Rps15	2.06592	0.988008
Cirbp	2.05975	1.16028
Fxyd7	2.0596	1.29726
Usmg5	2.05454	0.765324
Ina	2.05392	0.685352
Rps25	2.04526	0.845706
Ddx5	2.04375	1.83866
Sox11	2.03928	1.03883
Ckb	2.0379	1.9751
Mtch1	2.03716	1.79735
Eef1g	2.03489	0.933534
Btf3	2.03141	1.16238
Ywhag	2.02957	1.47234
Jund	2.02613	1.70629
Gsk3b	2.02318	1.5497
Atp5j	2.01554	0.901796
Hnrnpk	2.01499	1.53216
Sox4	2.01323	0.668882
Morf4l1	2.0132	1.34906
Nsg2	2.0101	1.84753
Mt3	2.00994	0.883614
Dnaja1	2.00784	1.49134
Eif5a	2.00569	1.16198
Rpl7a	2.00289	0.9556
Eid1	1.98892	1.01849
App	1.98469	2.50146
Rpl23a	1.98365	0.448236
Npm1	1.97882	1.32114
Zcchc12	1.97768	1.59653
Crmp1	1.97609	0.989865
Atp5f1	1.97369	1.07739
Atxn7l3b	1.97347	1.01636
Xist	1.97289	3.58447
Atp5h	1.97201	1.04201
Sncb	1.96773	1.0194
Rtn3	1.95886	2.04357
Aldoa	1.95685	1.57858
Arf5	1.95408	1.79215
Cpe	1.95301	2.14615
Pfdn5	1.95074	1.00494
Slc25a3	1.95057	1.59878
Tma7	1.94588	0.971477
Bsg	1.94163	2.39385
Ywhab	1.93903	1.27084
Myl6	1.93211	1.4075
Gabarap	1.93197	0.957364
Maged1	1.92808	2.50472
Rps12	1.9246	0.886359
Podxl2	1.91872	1.91924
Uqcrq	1.91762	1.1024
Caly	1.91639	2.66638
Gpx4	1.91369	1.16887
Cadm1	1.90298	2.06011
Nrxn2	1.90001	2.02684
Elob	1.89853	1.30387
Ap2m1	1.89737	1.10863
Pbx1	1.89574	1.26313
Atp5a1	1.89541	1.24415
Rpl36a	1.89416	0.746836
Clta	1.89162	1.13291
Sec61g	1.88871	0.710636
Evl	1.88854	0.96184
Ahi1	1.8831	2.10629
Hmgb3	1.87561	0.470984
Atp6v0b	1.87396	2.57482
Gpm6a	1.86722	2.19476
C1ql1	1.86045	0.125802
Cox7b	1.85933	0.579722
mt-Nd3	1.85563	2.11328
Elavl3	1.8546	1.54194
Uqcrh	1.85456	0.895878
Sub1	1.85451	1.46755
Atp5k	1.85404	0.867933
Dynlrb1	1.85224	0.772776
Eif4a2	1.84974	1.4807
Ptov1	1.84654	1.4434
Atp5c1	1.84537	0.928806
Cox6a1	1.845	0.971285
Tspan13	1.84256	1.47791
Rtn4	1.837	1.86242
Ndufc2	1.83558	1.70862
Camk2n1	1.83479	0.827636
Vamp2	1.82925	1.38911
Rab6a	1.82829	1.16702
Srsf3	1.82769	1.30753
Ran	1.82704	1.20512
Eef1b2	1.82482	1.14613
Nedd8	1.82414	0.970098
Vdac1	1.81337	1.03136
Rpl12	1.80978	0.969072
Resp18	1.80609	2.92527
Aes	1.80011	0.917739
Pkm	1.7955	1.50316
2010107E04Rik	1.79457	0.764924
Hnrnpa2b1	1.79296	2.07351
Syt4	1.79225	2.55185
Uqcrb	1.79212	0.962547
Bex1	1.79169	1.32187
Camk2n2	1.79032	0.952523
Arl6ip1	1.78971	1.92645
Fkbp1a	1.78791	1.15785
Uqcr11	1.78768	0.887782
Gabarapl2	1.78688	1.55642
Atp6v1g1	1.78586	0.843669
Tbca	1.77872	0.838011
Swi5	1.77821	0.976814
Pafah1b3	1.77812	0.695084
Hmgn1	1.778	0.849342
Erh	1.7748	0.400167
Vapa	1.77342	1.1325
Rbm3	1.77016	1.34882
Ubc	1.76603	2.21511
Dnajb6	1.76265	0.929424
Rpl27	1.762	0.600992
Ubl5	1.75751	0.957506
Ndufs5	1.7539	0.836168
Atp5d	1.75099	0.972786
Ywhaz	1.74654	1.28772
Cycs	1.74301	0.608695
Ndufb8	1.74243	1.10493
Serbp1	1.74061	0.870984
Olfm1	1.73506	0.74235
Tceb2	1.72974	0
Rab2a	1.71899	1.03379
Mdh1	1.71888	1.60954
Cisd1	1.71539	1.38705
Psma7	1.71387	1.17679
Klc1	1.70905	1.59899
Selenom	1.702	1.31917
Serf1	1.69654	0.370209
Pgam1	1.69485	1.31317
Scg2	1.69343	2.65496
Mrfap1	1.69058	1.24596
Dynll2	1.68719	1.23093
Uqcr10	1.68684	0.884292
Gng2	1.68266	0.89141
Hist3h2ba	1.67875	0.353908
Set	1.67415	1.0042
Chd3os	1.67273	0.680869
Ngfrap1	1.67239	0
Reep5	1.66666	1.80634
Dner	1.6653	1.55173
Tomm20	1.66183	1.40312
Zcchc18	1.66088	2.0875
Ndufb2	1.65613	0.88396
Pfn1	1.655	0.907656
Cd200	1.65378	1.90074
Ap2s1	1.65239	0.870159
Psap	1.65144	2.30823
Psma3	1.64893	1.41474
Inpp5f	1.64736	1.48212
Ranbp1	1.64587	0.933657
Ndufab1	1.6449	0.929855
Ttc9b	1.64448	0.551351
Zfp428	1.63826	0.403911
Ndufa5	1.63563	0.89589
Hmgcs1	1.6338	1.49082
Ndufb9	1.63323	0.873961
Morf4l2	1.63217	1.58166
Psmb6	1.62871	0.882371
Rbx1	1.62848	1.01311
Lmo4	1.62755	0.261519
Elavl2	1.62554	0.925901
mt-Nd4l	1.62485	2.0928
Vdac3	1.62253	1.16116
Arf1	1.61914	1.31204
Dstn	1.61205	0.730888
Cmpk1	1.60936	0.662447
Itm2b	1.60579	2.15192
Ndufa11	1.60152	1.32857
Hap1	1.60039	2.34726
Gdi1	1.60033	1.48762
Eif1b	1.59702	1.04944
Atp1a3	1.59687	1.90349
Kif5c	1.59598	1.26387
Prmt1	1.59454	0.843287
Eif3h	1.59443	0.768805
Eif3f	1.5941	0.390113
Jpt1	1.59188	1.03596
Ube3a	1.59007	2.4132
Rpl5	1.59002	0.771531
Matr3	1.58919	1.69563
Fscn1	1.58635	0.955407
Map1lc3b	1.58305	0.750294
Syp	1.58284	2.19568
Srp14	1.58227	1.02404
Serinc1	1.58156	2.13063
Ndufa7	1.57946	0.913797
C1qtnf4	1.57584	1.40988
Serp2	1.57435	0.717854
Hspe1	1.56923	0.885313
Ndufa13	1.56538	1.63054
Tspan3	1.56419	1.72653
Ube2d2a	1.56407	0.918738
Ndrg4	1.56355	1.72755
Ctbp1	1.56346	0.8443
Snap47	1.563	1.11552
Ppp2ca	1.56234	1.19369
Psip1	1.56171	0.864674
Fkbp3	1.56161	0.907333
Atxn10	1.55919	0.950845
Arhgdig	1.55879	1.23359
Serf2	1.555	0.827235
Snrpd2	1.55423	0.650772
Nefl	1.55419	0.976652
Mdh2	1.55371	0.889799
Calb2	1.55309	1.21835
Park7	1.55192	0.769433
Cspg5	1.55167	1.90371
Nrxn1	1.54787	2.07337
Pak3	1.54693	1.39131
Cst3	1.54571	2.70099
Ndufc1	1.54447	0.810183
Tcf25	1.54372	1.46949
Gabbr1	1.54358	2.0203
Pcdh17	1.54235	1.79317
Ube2s	1.53991	0.757261
Srsf2	1.53929	1.9442
Atp5g2	1.53915	0.809231
Tagln3	1.53718	0.867969
Ndufb5	1.53523	1.30137
Edf1	1.53418	0.79717
Tbcb	1.53399	0.98422
Epha5	1.53335	1.2342
Psmb1	1.53056	1.18005
Hras	1.52719	0.779176
Psmb5	1.52314	0.934183
Npdc1	1.52306	1.67953
Dclk1	1.52226	1.93409
Rufy3	1.522	1.29486
Ypel3	1.52171	0.887406
Ndufv3	1.5213	0.639609
Fis1	1.51863	0.549402
Prdx5	1.51631	0.632286
C1d	1.5163	1.06717
Cacybp	1.51517	0.80089
Vdac2	1.51382	0.846541
Fez1	1.51354	0.928363
Cbx3	1.51205	0.990067
Polr2m	1.51134	0.657637
Mlf2	1.50895	0.890729
Pcp4	1.5057	0.883042
Dad1	1.50526	1.64443
Myl12b	1.50469	0.977869
Smdt1	1.50411	0.756239
Atp6v0e2	1.50057	1.25178
Ube2n	1.499	1.05076
Ube2e3	1.49787	0.776288
Calr	1.49729	2.10047
Pfdn2	1.49195	1.1225
Paip2	1.49106	1.09037
Romo1	1.4908	0.607791
Nop10	1.49051	0.773849
Chl1	1.48839	1.52019
Map2	1.48789	1.99299
Tmeff1	1.48671	0.433416
Ndufa3	1.48444	0.931167
Cox7a2l	1.48307	0.580618
Snrpe	1.47911	0.494052
Bex4	1.478	0.825259
Pomp	1.47771	0.830146
Scg5	1.47681	2.03154
Ube2m	1.47646	0.976975
Rab6b	1.476	1.03009
Ube2v2	1.47537	0.878193
Timm8b	1.47497	0.658695
Nenf	1.47459	1.73174
1110004F10Rik	1.47382	0.603762
Sh3bgrl3	1.47154	0.713198
Crip2	1.46598	0.66828
Prmt2	1.46503	1.29622
Ntm	1.46406	1.55785
Araf	1.46262	1.25905
Mpc1	1.46073	0.897414
Uqcrfs1	1.45372	0.757641
Gnao1	1.45251	1.82469
Arl8a	1.45249	1.11037
Cfl2	1.45221	0.746677
Scoc	1.45182	0.846742
Pkia	1.45018	0.564067
Txn1	1.44696	0.714234
Sumo1	1.44507	0.775473
Anapc5	1.44419	1.5514
Tmod2	1.44416	1.08497
Atp6v1f	1.44411	1.00935
Ank2	1.44279	2.45853
Gria2	1.44235	2.94377
Rbm39	1.44195	2.07438
Ppp3ca	1.44195	1.67079
Fdps	1.4412	0.896154
Ndufs6	1.44056	0.611911
Dbn1	1.4393	1.80914
Mpped2	1.43927	1.06506
Stub1	1.43902	1.2683
Nap1l1	1.43782	1.24412
Slc22a17	1.43691	2.48526
Arpc1a	1.43662	0.716152
Fnbp1l	1.43463	1.59274
Rheb	1.43178	0.855556
Vsnl1	1.43127	1.0401
Mff	1.42996	0.861406
Rab11b	1.42553	0.540186
Rpl36al	1.42483	0.611035
Tusc3	1.42467	1.63428
Timm13	1.42429	0.695175
Mien1	1.42395	0.530625
Stxbp1	1.42303	1.49057
Camta1	1.42234	1.41379
Ube2d3	1.42229	1.33972
Tcf4	1.41962	1.3396
Arpc2	1.41869	0.959209
Ndufv2	1.41854	0.551103
Ndufa2	1.41793	0.738357
Akr1a1	1.41602	0.841132
Rpl22	1.41549	0.917501
Sdhb	1.41469	0.545861
H2afy2	1.41301	0.74787
Celf2	1.40874	1.52827
BC031181	1.40855	1.18505
Cct5	1.4077	0.672038
Hnrnpdl	1.407	1.58901
Wsb2	1.40695	0.671021
Mgst3	1.40653	0.781153
Mapre1	1.40475	1.04636
Blcap	1.40384	0.954137
Rnf7	1.40179	0.720927
Zfp706	1.40154	0.723205
Rab14	1.40058	1.27971
Ndufa8	1.39863	0.646998
Cct2	1.397	0.588359
Rsrp1	1.39629	2.36492
Ndufb10	1.39613	0.815524
Uqcc2	1.39522	0.602922
Tsn	1.39401	1.1803
Myt1l	1.3926	1.41292
mt-Nd5	1.38712	1.56616
Hmgn2	1.38205	0.574805
Fabp3	1.38035	0.67666
Ndufb11	1.37885	1.10564
Ppp1ca	1.37858	0.828759
Peg3	1.37671	2.34589
Rabac1	1.37667	1.68288
Ptprs	1.37424	1.94928
Tubb4b	1.37331	1.10021
Cntn1	1.37313	1.61228
Dcx	1.37168	0.858719
Ctxn1	1.36799	0.564231
Slc17a6	1.36698	1.36315
Cd47	1.36473	1.49716
Bcas2	1.36285	0.87842
Gdi2	1.36199	0.902005
Rnf14	1.35925	0.783744
Rmst	1.35824	1.80035
Mrpl20	1.35747	0.534465
Reep1	1.35517	1.23153
Chgb	1.35388	1.80072
Cd81	1.35291	2.07884
Ptn	1.35268	1.3737
Cct7	1.35174	0.771697
Ndufa1	1.35125	0.887197
Snrpd1	1.3506	0.555928
Gtf2h5	1.34903	0.782506
Elavl4	1.34777	1.11236
Nedd4	1.34696	1.42049
Arf4	1.3463	1.14013
Fgf13	1.34497	0.315537
Ube2b	1.34403	1.25511
Pdap1	1.34319	0.425073
Nav1	1.34081	1.92438
Erp29	1.33908	1.69842
Pdcd5	1.33776	0.702723
Fus	1.33622	2.08342
Eif5	1.3343	1.0836
Nptn	1.33404	1.91763
Auts2	1.33401	1.04555
Acot7	1.3336	1.03593
Sbk1	1.33266	0.354723
Cdk5r1	1.33172	0.871261
Psma2	1.32842	0.820696
G3bp2	1.32836	1.10973
Pnmal2	1.32607	1.20221
Psmb2	1.32539	0.80499
Dctn3	1.32508	0.760111
Chst2	1.32489	0.494155
Atp9a	1.32421	1.29139
Bcl11a	1.32133	0.27753
Cbarp	1.32035	1.81724
Tomm7	1.3177	0.706348
Ank3	1.31755	2.238
Tmem256	1.31727	0.465351
Prkar1a	1.31599	1.31797
Stx7	1.31532	0.612694
Snx3	1.31433	0.69832
Coa3	1.31412	0.662811
Selenok	1.31347	1.69202
Map2k2	1.31272	1.07124
Vcp	1.31232	1.33973
Grina	1.31222	1.56447
Sms	1.31213	0.826329
Ncald	1.31012	1.12658
Cend1	1.3093	0.553689
Gnb2l1	1.30924	0
Mkrn1	1.30841	0.600117
Mrpl52	1.30824	0.670916
Ddah2	1.30584	0.140484
Srrm2	1.30481	2.19344
Psmb7	1.30459	0.728674
Minos1	1.30363	0.952006
Hnrnpa3	1.30273	1.04657
Ldhb	1.30209	0.644405
Arhgdia	1.30155	0.942503
Hdac2	1.30071	0.589616
Sptbn1	1.3004	1.75757
Psmb3	1.29942	0.920278
Syt11	1.29939	1.92147
Kif1b	1.29883	1.91524
Arpc5	1.29864	0.635279
Pafah1b1	1.29764	1.17663
Cbln2	1.29504	0.317051
Trappc4	1.29391	0.754903
Sfpq	1.2938	1.57056
Fam103a1	1.29338	0.448902
Eif3k	1.29035	0.463077
Mpc2	1.29032	0.933563
Ppdpf	1.28953	0.333775
Ndufa12	1.28938	0.711296
Dctn2	1.2886	1.0623
Snrpg	1.28695	0.262424
Chchd10	1.285	0.675093
Rab10	1.28117	0.83104
Scand1	1.28042	0.60786
Cyc1	1.28023	0.986513
Scd2	1.27869	1.4108
Cxadr	1.27713	1.21419
Bzw1	1.27648	0.895991
Bax	1.27529	0.780164
Tomm22	1.27527	0.646767
Sf3b6	1.27395	0.328206
Selk	1.27294	0
Atp5o	1.27269	0
Fam171a2	1.27234	1.29772
Atat1	1.27094	0.857108
Brk1	1.27078	0.765421
Tpi1	1.26798	0.854505
Gpi1	1.26677	1.99806
St13	1.26588	0.778459
Dync1i2	1.26218	1.26573
Pgls	1.26092	0.622697
Fkbp8	1.25927	0.981926
Psd	1.25852	1.36528
Pgm2l1	1.25687	1.08468
Mycbp2	1.25524	2.17793
Dda1	1.25491	0.604037
Cct4	1.25386	0.677735
Hpcal1	1.25372	0.545767
Gm42418	1.25355	2.27548
Dusp26	1.25138	0.830284
Emc10	1.24934	1.01713
Atp6v0d1	1.24922	0.91208
Ppp2r1a	1.24878	0.71952
Ndufb7	1.24839	0.571408
Cnbp	1.24724	0.872699
Mapk8ip1	1.24674	1.32389
Ncl	1.24488	0.933014
Sec62	1.24404	1.23993
Necab2	1.24313	0.327424
Ndufs4	1.24306	0.560767
Tcp1	1.24265	0.794698
Tmem130	1.2421	1.52305
2900011O08Rik	1.2418	0.691159
Sdc3	1.23946	1.16015
Guk1	1.23854	0.521324
Atp6v1e1	1.23829	0.477428
Cct8	1.23807	0.826826
Apbb1	1.23599	1.14276
Tsg101	1.23574	0.464585
Ntng1	1.23384	1.18979
Prdx1	1.23315	0.975068
Pfdn1	1.23177	0.755624
Higd1a	1.23172	0.933386
Bzw2	1.23082	0.637382
Psmb4	1.23	0.677378
Enc1	1.2293	0.414813
Pabpc1	1.22923	0.987735
Cacna2d1	1.22797	1.76536
Maged2	1.22728	1.63264
Bri3	1.2263	0.572831
Slc25a5	1.22413	0.613729
Alcam	1.22333	1.86668
Eno1	1.22297	0.633323
Spcs1	1.22189	1.14276
Csnk1a1	1.2217	1.35644
Sv2a	1.22092	1.60947
Ppib	1.22048	1.39927
Trappc6b	1.21968	0.677748
Klf7	1.21679	1.35664
Pcbp1	1.21602	1.01881
Dnajc5	1.21586	1.06628
Ppp2r2b	1.21569	0.858091
Cetn3	1.21467	0.625367
Sec61b	1.2141	0.637528
Cotl1	1.2135	0.339709
Csnk1e	1.2128	0.575188
Rab18	1.21233	0.569031
Zfand5	1.21129	1.07319
Ndufa6	1.21043	0.568605
Ndufb4	1.21043	0.563818
Zc3h15	1.20979	0.658501
Rrp1	1.20743	1.25892
Hnrnph1	1.20673	1.35771
Ptp4a1	1.20522	0.971592
Selenof	1.20407	1.56102
Gprasp1	1.20352	1.62505
Snap25	1.20222	1.37751
Kif1a	1.20188	1.66991
Ctnnbip1	1.19947	0.419117
Uqcrc1	1.19625	0.707345
Eef1a2	1.19567	1.13974
Arxes1	1.1956	1.57862
Svbp	1.19462	0.240784
Pcbp2	1.19441	0.974318
Hnrnpab	1.19396	0.59042
Drap1	1.19277	0.559405
Rbfox2	1.19203	1.24344
Eif2s2	1.19138	0.740845
Gabarapl1	1.19127	0.924279
Gde1	1.19052	1.23028
Fkbp4	1.18733	0.635781
Ccl27a	1.18686	0.867027
Rab7	1.18677	0.803535
Rala	1.18613	0.455266
Rnf11	1.18486	0.715827
Aplp2	1.18096	1.40861
Ssb	1.18091	0.859856
B630019K06Rik	1.17961	0.719067
Hcfc1r1	1.17908	0.66408
Ptges3	1.17829	0.80421
Ccdc88a	1.17798	1.54566
Pja2	1.17713	1.13453
Prkacb	1.17698	1.39224
Bmyc	1.17691	0.642922
Atp6ap2	1.17628	1.61301
Rab3c	1.17493	1.21093
Oaz2	1.17421	0.494418
Atp2b1	1.17386	1.98703
Ndufs7	1.17336	1.32507
Pafah1b2	1.17251	0.76373
Prelid1	1.17227	0.487361
Trim2	1.17182	1.44571
Atp6v1a	1.17136	1.06168
Clstn1	1.17132	1.27667
Vat1	1.16949	1.01804
Oxct1	1.16844	0.954555
Ndfip2	1.16793	1.07437
Atrx	1.1673	1.62294
Ndufb3	1.16684	0.714017
Pcbp4	1.16658	1.20205
Srsf5	1.16656	1.63413
Gtf2a2	1.16645	0.646978
Snrpf	1.16289	0.48247
Ier3ip1	1.16179	0.698401
Pitx2	1.16045	0.169052
Alg2	1.15973	1.14268
Cfdp1	1.15751	0.590316
Plppr3	1.15747	1.46249
Psma5	1.15744	0.792249
Serpine2	1.15627	1.03745
Son	1.15518	1.49599
Pfdn4	1.1531	0.426166
Rnf10	1.15268	0.846396
Idh1	1.15253	0.339235
Rundc3a	1.15146	1.30723
Cnrip1	1.15132	0.995642
Trim35	1.15124	0.894579
Ankrd12	1.15017	0.952994
Lamp1	1.14984	1.32082
Dmrta2	1.14981	0.304226
Rhob	1.14922	0.848329
Prkaca	1.14602	0.789109
Metap2	1.1457	0.820062
Nisch	1.14565	1.66558
Sept7	1.14514	1.1668
0610012G03Rik	1.14504	0.565779
Actl6b	1.14349	0.754531
Saraf	1.14331	1.73663
Kifap3	1.14322	0.596147
Lingo1	1.14289	0.873343
Canx	1.14243	1.68518
Atp6v1d	1.14218	0.788322
Hnrnpu	1.1417	1.61779
Eef1e1	1.14054	0.57076
Zcrb1	1.14016	0.849678
Tmed2	1.13929	1.0639
Psmd8	1.13919	0.700824
Adgrl1	1.13907	1.26694
Sybu	1.13905	1.00101
Khdrbs1	1.1381	0.51138
Acat1	1.13804	0.643035
Phb2	1.13787	0.82237
Ppp1r14b	1.13786	0.987507
Lsamp	1.13715	2.1696
Atp5o.1	1.13694	0.758003
Syngr3	1.13657	1.35291
Usp22	1.13644	1.15299
Mrpl33	1.13572	0.665229
Wdr6	1.13551	1.17207
Ndufb6	1.13531	0.949004
Nono	1.13524	0.747231
D8Ertd738e	1.13524	0.655963
Ebf3	1.13277	0.384162
Uchl3	1.13185	0.669967
Top1	1.13159	1.07892
Glrx3	1.13101	0.624799
Vps29	1.13098	0.673262
Higd2a	1.13014	0.580963
Psma1	1.12946	1.11742
Pbx3	1.12935	0.291976
Stx12	1.12846	0.510384
Fam57b	1.12808	0.399018
Srp9	1.12723	0.834378
Enho	1.12461	0.341623
Hnrnpa0	1.12406	0.910184
Uqcrc2	1.12334	0.466112
Slc12a5	1.12312	1.68331
Csrp2	1.12272	0.299025
Ube2d1	1.12238	0.230704
Eif3e	1.12163	0.379521
Capza2	1.1208	0.782613
Psma6	1.11792	0.482679
H1fx	1.11782	0.541027
Ociad1	1.11766	0.934127
Ube2e1	1.11766	0.466154
Arxes2	1.11693	1.43669
Fam69b	1.11659	0.857661
Sumo3	1.11629	0.573251
Mrps33	1.11565	0.411646
Rab1a	1.11549	0.682905
Atp2a2	1.11472	1.78557
Srsf7	1.1143	1.18922
Tcaf1	1.11329	1.26122
1500011B03Rik	1.1124	0.751534
Prkar1b	1.11038	1.00557
Nrep	1.11007	0.366532
Rab11a	1.10973	0.466834
Cuedc2	1.10783	0.793142
Ubqln2	1.1067	0.874891
Emc6	1.1045	0.648522
Palm	1.10379	0.553521
Hsp90b1	1.10338	2.06109
Myef2	1.10284	1.29731
Polr2f	1.10283	0.425729
Smim14	1.10227	0.864716
Tspan7	1.10071	1.63124
Sem1	1.09995	0.810208
Skp1a	1.09955	0.532144
Pin1	1.09951	0.54987
Psma4	1.09939	0.671476
Hnrnpc	1.09841	0.696774
Hspd1	1.09836	0.879037
Cmas	1.09737	0.630741
Arpc3	1.09589	0.573727
Caprin1	1.09492	0.938217
Scamp1	1.0913	1.13432
Kif3a	1.09109	1.07309
Samd14	1.09015	0.606682
H2afy	1.0901	0.89058
Pja1	1.08953	1.04878
Cmip	1.08905	0.947649
Pdxp	1.08781	0.808295
Polr1d	1.08734	0.455231
Pten	1.08688	1.18538
Efnb3	1.08668	1.37929
Ergic3	1.08633	1.23691
Tmem234	1.08449	0.992449
Gnaq	1.08345	1.2925
Eri3	1.08324	0.702929
Gm2694	1.08291	0.0425601
Tspyl4	1.08221	0.752825
Ralyl	1.08201	0.78139
Actr3	1.08144	0.555411
Arpc5l	1.0801	0.679145
Chchd6	1.07947	0.320803
Kmt2e	1.07898	1.06358
Tsen34	1.07891	0.720371
Acat2	1.07864	0.266616
Anapc11	1.07856	0.389899
Mettl9	1.07631	0.424656
Nrgn	1.07558	0.544978
Vbp1	1.07551	0.628337
U2af1	1.07498	0.485772
Snrpd3	1.07445	0.396422
Epn1	1.0742	0.563314
Ebf2	1.07278	0.0839544
Krtcap2	1.0717	0.793614
Mrpl12	1.07027	0.528864
Cyb5a	1.07025	0.629176
Dpysl5	1.06981	0.745047
Ldha	1.06958	1.16184
Atp6v1b2	1.0693	1.1407
Ppp3cb	1.06898	0.780456
Pea15a	1.06895	0.682555
Gnaz	1.06891	0.854274
R3hdm4	1.0673	0.701329
Cdk14	1.06516	0.924591
Uba1	1.06348	0.628347
Glrx5	1.06335	0.787066
Trappc2l	1.06309	0.57098
Tmx4	1.06293	1.84901
Rraga	1.06293	0.885307
Prkcb	1.06253	0.994286
Phlda1	1.0622	0.845795
Acp1	1.06211	1.32666
Wbp5	1.06198	0
Psmd7	1.06192	1.17941
Napb	1.06104	0.674821
Prnp	1.06045	1.63137
Nipsnap3b	1.0597	0.239504
Tprgl	1.05888	0.660055
Smarca2	1.05887	0.861842
Hnrnpr	1.05868	0.870698
Abhd8	1.05825	0.53696
Arl6ip5	1.0573	1.06482
Spcs2	1.0572	1.419
Arl3	1.0571	0.425155
Dlgap4	1.05677	0.814903
Eif3i	1.05627	0.587889
Cask	1.05533	1.14359
Trmt112	1.05477	0.606387
Rac1	1.05443	0.780037
Ap3s1	1.05407	0.422119
Plppr4	1.05182	1.64246
Bnip3l	1.05175	0.53884
Irf2bpl	1.05165	0.633154
Cbx5	1.05165	0.795379
Cyth2	1.05132	0.32153
Txnl1	1.05043	0.757815
Fam171b	1.04997	0.879755
Hmgcr	1.04991	1.49488
AW551984	1.04862	1.26957
Dpy30	1.04836	0.310879
Tmem158	1.04748	0.905561
Tmem258	1.04748	0.490599
Ssr4	1.04743	1.51593
Akap9	1.0457	1.03388
Cbln1	1.04564	0.343486
Myeov2	1.04441	0
Cct3	1.044	0.738786
Dnm1	1.04377	1.5331
Fam49b	1.0435	0.993537
Stard3nl	1.04272	0.682685
Tubb4a	1.04196	0.599273
Ddx39b	1.04135	1.19608
Capzb	1.04003	1.01431
Thoc7	1.03979	0.467613
Mea1	1.03895	0.325255
Ssbp4	1.03861	1.44813
Atp6v1g2	1.03831	0.697678
Syt1	1.0383	1.42059
Sh3bgrl	1.03788	0.35469
Pam16	1.03701	0.915331
Nbdy	1.03567	0.726997
Tmeff2	1.03511	1.29514
Impact	1.03411	1.55082
Tmem59	1.03328	1.44432
Tmem163	1.03317	0.682774
Cops9	1.03244	0.414676
Ap1s2	1.0324	0.63076
Ewsr1	1.03132	1.31012
Mtx2	1.0296	0.504998
Chmp5	1.02958	0.614152
Arf3	1.02924	0.86187
Cdk4	1.02877	0.611323
Pmvk	1.02785	0.559679
Mrpl30	1.02767	0.316159
Nrn1	1.02755	0.456366
Gprasp2	1.02745	1.63059
Sgta	1.02652	1.13073
Vti1b	1.02617	0.395869
Znhit1	1.02556	0.265168
2410015M20Rik	1.02491	1.08234
Ppp1cc	1.02468	0.526717
1110008P14Rik	1.02443	0.326552
Bag1	1.02416	0.468153
Cltb	1.02347	1.09013
Tspan6	1.02344	0.96304
Shfm1	1.02303	0
Nudc	1.02252	0.681433
Mrps24	1.02251	0.412872
Ndufs3	1.02242	0.655175
Akirin2	1.02175	0.328513
Psmc5	1.02069	0.768369
Ube2e2	1.0203	0.645878
Denr	1.02019	0.374669
Elof1	1.01973	0.48162
Csde1	1.01894	0.859301
Bbip1	1.01839	0.464935
Arpp19	1.01821	0.737019
Dtx3	1.01808	0.968189
Lamtor2	1.01744	0.4018
Psmd4	1.01739	0.952894
Klhdc2	1.0169	0.794693
Dnaja2	1.01678	0.67297
Srsf11	1.01595	1.92601
A730017C20Rik	1.01536	0.909216
Yeats4	1.01502	0.285406
Ndufs2	1.01487	0.768267
Ndufa10	1.01398	0.684932
Atp13a2	1.01326	1.765
Cltc	1.01277	1.20866
Ilf2	1.01246	0.806062
Parp6	1.01229	0.784023
Olfm2	1.01176	1.04754
Lrrc4b	1.01164	1.18776
Cxx1a	1.01102	0
Brwd1	1.01043	0.865609
Fam19a5	1.01014	0.559633
Ppp1cb	1.01006	0.838635
Lsm4	1.00983	0.326518
Ppp3r1	1.00981	0.783554
Spint2	1.00957	0.904237
Rcn2	1.00895	0.948442
Rbm25	1.00726	1.3345
Tkt	1.00724	1.17546
1110008F13Rik	1.00633	0.494052
Ctnnd2	1.00577	0.90034
Slc24a5	1.00505	1.47424
Sept3	1.00236	1.17421
Snrpb	1.0013	0.805797
Dlk1	1.00089	1.15616
Ankra2	1.00072	0.542693
Cadm2	1.00066	1.03702
Pitpna	0.999762	0.656491
Pcmt1	0.999648	1.4131
B230219D22Rik	0.99846	0.488599
Rprm	0.996796	0.522402
Prrc2b	0.996078	1.16316
Sf3b2	0.99494	0.931814
Tia1	0.994709	1.77467
Sar1b	0.994226	0.973723
Arl2bp	0.993513	0.628791
Gm10076	0.993468	0.246021
Mob4	0.993025	0.717642
Strap	0.992581	0.603407
Ube2i	0.99237	0.841163
Puf60	0.992187	1.00118
Samd10	0.992156	0.434433
Snap91	0.99195	0.903253
Chd3	0.991866	0.923555
Dnajc7	0.991384	0.653799
Macf1	0.99037	1.60729
Itfg1	0.989937	1.2816
Srsf6	0.989205	0.931775
Opcml	0.989176	1.65777
Gpr162	0.98901	1.0927
Ccdc124	0.989002	0.238196
Fkbp2	0.988778	1.70624
Dazap1	0.988458	0.653799
Cript	0.987622	0.303313
Ap1s1	0.986862	0.542437
Rit2	0.986678	0.906023
Luc7l3	0.986584	1.83334
Meaf6	0.985304	0.910955
Mapre2	0.982738	0.745324
Nova1	0.982681	0.670652
Csnk2b	0.981816	0.38115
Lin7c	0.981307	0.506027
Hbb-y	0.9808	0
Mmd	0.980786	0.252319
Abhd17a	0.98037	0.434612
Cox14	0.980006	0.327515
Polr2j	0.979526	0.338236
Phyhipl	0.978555	0.592137
Ppm1a	0.978303	1.26906
Tra2b	0.978133	1.06998
Smarce1	0.977732	0.15362
Hspa5	0.977694	2.00371
Tmem147	0.977071	0.937263
Lmx1a	0.976974	0.0679411
Stk25	0.976531	0.958783
Ube2k	0.976267	1.07275
Hmgn3	0.976251	1.45084
Slc6a1	0.976081	1.12461
Fdft1	0.975142	0.811331
Nrxn3	0.975042	1.5457
Hnrnpd	0.974946	0.84388
Zbtb20	0.974538	2.0744
Ncor1	0.97446	1.09786
Strbp	0.973379	1.03362
Soga3	0.973367	0.854685
Gstm5	0.973184	0.963343
Taldo1	0.973081	0.531837
Rad23b	0.973039	0.771179
Mrpl34	0.972936	0.237232
Lsm1	0.972833	0.431072
2210016L21Rik	0.972563	0.770063
Timp2	0.972557	1.33082
Psme1	0.972456	0.730385
Sep15	0.97217	0
Kidins220	0.970385	1.21293
Snu13	0.970129	0.873726
Nsf	0.970125	1.021
Cops6	0.969459	0.517981
Smap1	0.969386	0.463906
Hdgf	0.967925	0.590724
Chchd1	0.967872	0.37244
Eif3a	0.967257	0.923745
Scn3b	0.967166	0.869589
Tmed9	0.966627	1.30319
Scn3a	0.965249	1.27285
Srp19	0.965137	0.591561
Zfr	0.964467	1.19856
Ppa1	0.964376	0.453397
Syn1	0.963487	0.714193
Znrf1	0.963483	0.961315
Syn2	0.963383	1.0797
Khdrbs3	0.962845	0.788385
Mrps17	0.962081	0.496515
Ccdc184	0.960055	0.861065
Celf5	0.959767	1.46255
Abr	0.958112	1.14731
Eif4e	0.957542	0.647969
Mageh1	0.957268	0.952155
Negr1	0.956612	1.35632
Tsnax	0.956421	0.650973
Cacnb3	0.956082	0.584369
Sars	0.95565	1.04542
Ppp1r1a	0.954978	0.431121
Pnisr	0.954956	1.70301
Chmp2a	0.953374	0.565141
Arglu1	0.952612	1.89517
Jph4	0.951821	1.25647
Foxa1	0.950512	0.0889985
Srpk2	0.950006	1.18394
Ptbp2	0.949921	1.12091
Tmem132a	0.949594	1.37531
Rnf5	0.94932	0.394898
Eloc	0.949025	0.560896
Nap1l4	0.948376	0.810222
Fubp1	0.948196	1.22006
Rangap1	0.947851	0.78028
Tmem246	0.946963	0.980171
Bola2	0.946906	0.371006
Lsm7	0.94687	0.931074
Map4	0.946695	0.894682
Fbxo9	0.946161	0.5071
Rbm4b	0.946152	1.33487
Mat2a	0.946009	1.27837
Atp6ap1	0.945919	1.32232
Ssu72	0.945856	0.418978
Sfxn1	0.94559	0.761584
Mrpl41	0.945057	0.761836
2900097C17Rik	0.944861	0.961393
Cdkn2d	0.944399	0.497943
Raly	0.943284	0.411377
Fam32a	0.943227	0.40512
Selenoh	0.942832	0.387013
St8sia2	0.941356	0.563954
Nptxr	0.940521	1.22359
Rgs17	0.940403	0.82556
Enah	0.940361	1.5463
Rack1	0.939703	0.974594
Actr1a	0.939292	0.531513
Trim28	0.938492	0.763375
Deaf1	0.937926	0.612031
Mrps21	0.937719	0.413411
Gps1	0.937095	0.885511
Map9	0.936543	0.526453
Apba2	0.936429	0.733094
Dcun1d5	0.936345	0.843576
Actr2	0.935634	0.840507
Spop	0.935024	0.48828
Eif4h	0.934508	0.640499
Txndc17	0.933918	0.525593
Spin1	0.933697	0.542583
Dtd1	0.93354	0.814154
Luc7l2	0.933262	2.01918
Sqle	0.93284	1.11942
Polr2i	0.932633	0.262624
Sf3b1	0.931299	1.5158
Atp2c1	0.931157	1.48786
Hdgfrp3	0.931008	0
Wsb1	0.930571	1.35028
Aco2	0.930415	0.811339
1110065P20Rik	0.930068	0.478097
Rtf1	0.929603	0.588609
Spock2	0.929497	1.31603
Tulp4	0.929208	1.4183
Ube2l3	0.928973	0.645861
Smarcd3	0.928972	0.86424
Camk2d	0.928597	1.77653
Cadps	0.928069	1.71669
Prr7	0.928029	0.788528
Kctd13	0.927257	0.364685
Med28	0.92706	0.283673
Rwdd1	0.92657	0.540037
Srcin1	0.926399	1.22432
Coprs	0.926387	0.424682
Mrpl43	0.926377	0.32393
Zfp580	0.926336	0.220362
Cdh13	0.926222	1.14493
Fam216a	0.92566	0.614478
Sarnp	0.923494	0.32913
Phf5a	0.922905	0.395593
Sptan1	0.921451	1.52225
2700060E02Rik	0.921361	0
Dynlt1a	0.921154	0.654558
Rbmxl1	0.920998	0.552984
Ndufs8	0.920366	0.775459
Dync1h1	0.920068	1.42709
Tmbim6	0.919942	1.33496
C1qbp	0.918746	0.507391
Fam220a	0.918247	0.472452
Bod1	0.917657	0.369356
Arl4c	0.917599	0.985627
Pdrg1	0.917147	0.539933
Aurkaip1	0.916741	0.592708
Rsrc2	0.915696	0.755155
Polr2k	0.915435	0.446133
Map6	0.914623	1.11652
Dnmt3a	0.913669	1.34579
Ctsb	0.913335	1.43013
Smarcb1	0.913023	0.375764
Rnps1	0.912952	0.564417
Mrpl42	0.912822	0.233606
Tmx2	0.912182	1.06058
Mcts1	0.911978	0.486933
Chga	0.911676	1.4499
March6	0.911375	1.21724
Tpgs2	0.910855	0.258594
Eny2	0.910362	0.861445
Gnai2	0.910064	1.3302
Nbea	0.909977	1.81036
Tm2d1	0.909026	0.671524
Nxf1	0.908568	0.879353
Sh3glb1	0.908182	0.688653
Ppm1g	0.907201	0.808123
Smim7	0.906453	0.678407
Gpx1	0.906394	0.272469
Lamtor4	0.906064	0.856305
Nol7	0.905999	0.533795
Eid2	0.905382	0.674657
Tmem50a	0.905044	1.02846
Pfdn6	0.904467	0.405005
Gdpd1	0.904237	0.769066
Brd3	0.903732	0.755883
Atox1	0.903571	0.372284
Tm2d2	0.902534	0.807223
Snrnp70	0.902493	1.95152
Clip3	0.901785	0.428806
Tpm3	0.901577	0.810823
Fos	0.901214	1.35472
Fam92a	0.900934	0.752102
Shank1	0.899858	1.35363
Arl1	0.899836	0.796503
Magi1	0.899591	1.61954
Trir	0.899035	0.73722
Scrn1	0.898922	0.626646
Rer1	0.898218	1.05321
Gna11	0.897814	0.937099
Eif3c	0.897403	0.502974
Ddah1	0.896414	0.420779
Nucks1	0.896387	0.426766
Hnrnpf	0.8959	0.586088
Trim32	0.895042	0.429036
Tmem30a	0.894059	1.32225
Tmem167	0.894032	0.599847
2310036O22Rik	0.893983	0
Ncan	0.893978	0.896413
Atp6v0a1	0.893597	1.4479
Dst	0.893585	1.92925
Raph1	0.893453	1.21968
Dpp6	0.893345	1.62394
Tle4	0.893202	0.762091
Lsm6	0.892616	0.467895
Psmc6	0.892401	0.783303
Hypk	0.892359	0.431118
Pdia3	0.891981	1.23428
Usp34	0.891756	1.21524
Uba52	0.891486	0.289051
Manf	0.890818	1.08189
Pbrm1	0.890648	1.04225
Rtl8a	0.890635	1.17576
Prpf19	0.888507	0.61204
Cope	0.888245	0.63727
Slc38a1	0.887972	1.68987
Rap1b	0.88797	0.449547
Ptp4a2	0.88795	0.525655
Gdap1l1	0.887734	0.420107
Stau2	0.886372	0.580192
Pclo	0.88583	1.66171
Timm9	0.885616	0.669091
Psmc2	0.884758	0.717435
Eif5b	0.884738	0.785601
Sh3bp5	0.884137	0.367357
Ppig	0.882965	0.779026
Kif5a	0.882644	0.965428
Capns1	0.882606	0.535948
Top2b	0.882269	0.824091
Pgk1	0.882214	0.764812
Mzt1	0.88165	0.270636
Maz	0.881588	0.975887
Nudt21	0.881193	0.543708
Sdhd	0.88052	0.601334
Runx1t1	0.880273	0.663305
Syt13	0.879618	0.643603
Magee1	0.879613	1.30504
Ubxn1	0.879606	0.492226
Btf3l4	0.878628	0.202552
Etnk1	0.87851	1.39787
Chst1	0.878439	0.996894
Ift20	0.878294	0.578919
Ddx24	0.878289	1.04248
Sobp	0.877475	0.866635
Psenen	0.877398	0.830675
Got2	0.877229	0.595778
Strn4	0.87693	1.04507
Pomc	0.876523	3.88927
Ap2a2	0.876377	0.839842
Unc119	0.87633	0.423959
Snx16	0.875986	0.436166
Sfr1	0.875964	0.578327
Nfu1	0.875049	0.405575
Cystm1	0.874672	0.312797
Ube2r2	0.874027	0.519773
Clec2l	0.87032	0.401564
Cdkn1c	0.870204	0.0068106
Chn1	0.870036	0.733395
Cwc15	0.869398	0.457338
Dtnbp1	0.869278	0.174392
Ppp1r2	0.869012	0.489253
Mrpl14	0.868784	0.351899
Mrps26	0.868678	0.661747
Cbr1	0.868119	0.564749
Cbx6	0.866968	1.17893
Txn2	0.866833	0.515618
Vat1l	0.866757	0.981897
Zdbf2	0.865999	1.63322
Mir124-2hg	0.865969	0.38241
Esd	0.865639	0.401807
Rell2	0.864821	0.714798
Mbd3	0.864686	0.521153
Npepps	0.864033	0.925561
Mapre3	0.863789	0.910207
Tomm5	0.863425	0.184297
Trappc3	0.863357	0.782008
Smarcc2	0.862705	1.03723
Usp9x	0.861697	1.41571
Ncs1	0.861499	0.582595
Ptpn5	0.8613	1.1527
Ppp1r11	0.861192	0.544675
Commd3	0.860931	0.576321
Grin2b	0.860188	1.54587
Chtop	0.860142	0.355137
Ntan1	0.860142	0.408698
Smarca4	0.859006	0.588455
Kcnq1ot1	0.858622	2.87099
Tusc2	0.858548	0.250695
Slc25a11	0.858455	0.481725
Cadm3	0.858235	1.21783
Rp9	0.858008	0.786179
Dcakd	0.857768	0.415979
Bend6	0.856916	0.430702
Nabp2	0.856591	0.41581
Idh3b	0.856525	0.723417
Gpr85	0.855521	0.588709
Sys1	0.855378	0.487495
Elmo1	0.854141	0.565033
Dut	0.853365	0.18969
Ndufv1	0.852784	0.633842
Ebf1	0.852595	0.657682
Rasgrp2	0.852505	0.608632
Dcaf7	0.852472	0.937313
Srsf1	0.851649	1.04499
Grb2	0.851392	0.537801
Fyn	0.851391	0.679561
Zc2hc1a	0.851371	0.491856
Fut9	0.85124	0.760098
Rnf208	0.851115	0.595201
Prrc2c	0.85102	1.51181
Nrp2	0.850661	0.983558
Srrm1	0.850075	1.54772
Yaf2	0.850074	0.467543
Psmd6	0.84912	0.68724
Usp29	0.848088	1.68463
Copg1	0.84706	0.828705
Sod2	0.845837	0.492056
Scn2a	0.845207	1.74722
Tmed10	0.845126	1.10431
Cacng4	0.844892	0.583499
H13	0.844076	1.0031
L1cam	0.843976	1.2825
Mapk1	0.843843	1.02017
Smim10l1	0.843817	0.506535
Ubxn6	0.843278	0.679813
Psmc4	0.84166	0.913753
Ndrg3	0.840738	0.99233
Pdzrn4	0.840547	0.355732
Mtch2	0.839718	0.819123
Ostc	0.839207	0.986579
Atf4	0.838748	0.963205
Zfhx3	0.838714	1.59713
Ufc1	0.838088	0.464585
Hnrnph3	0.837925	0.666174
Sez6l2	0.836868	1.3235
Csk	0.836481	0.363845
Pkig	0.836289	0.278318
Haghl	0.836131	1.3223
Psmd13	0.836128	0.754462
Wrb	0.835666	0.586517
Ip6k2	0.835645	1.00474
Chmp4b	0.835207	0.383792
Pcdh19	0.834374	1.25748
Cyfip2	0.834325	0.883108
Arpc4	0.834264	0.457204
Kif2a	0.833825	0.611748
Nhp2l1	0.833622	0
Eif1ax	0.833044	0.163889
Fsd1	0.83285	0.745649
Cbln4	0.832651	0.173655
Nell2	0.832476	0.790582
Tomm40	0.83239	0.771135
Rbbp6	0.832377	1.12283
Tnrc6c	0.832361	1.52272
Nhlh2	0.83225	0.469155
Cdkn1a	0.832133	0.324201
Ivns1abp	0.831592	0.820174
Dgcr6	0.831457	0.221989
Adprh	0.830739	0.943884
Clmp	0.830184	0.39261
Csdc2	0.829123	0.4522
Mrpl18	0.829101	0.279787
Ube2j2	0.829101	0.447465
Gnai1	0.828966	0.592402
Dlg4	0.828883	1.53051
Gm16286	0.827715	0.719996
Ctnnb1	0.82598	0.63239
Sppl3	0.824222	0.799199
2410004B18Rik	0.824104	0.418454
Ssbp3	0.824049	1.10038
Grik5	0.823923	1.3925
Ap2b1	0.823789	0.653044
Tonsl	0.823288	0.243929
Dnajc8	0.822977	0.508352
Arl4a	0.82266	0.930394
Nckap1	0.822321	0.818605
Nudt3	0.821503	0.620774
Prkra	0.821378	0.295479
Syt16	0.821309	0.704377
Ppp2r2c	0.821226	0.649871
Cfap36	0.820988	0.314068
Zranb2	0.820702	1.50675
March5	0.820119	0.428843
Mrpl28	0.820062	0.297611
Gabrb3	0.819741	1.33448
Snrpc	0.819387	0.371072
Nsfl1c	0.819251	0.629432
Disp2	0.818831	1.2672
Pnck	0.818442	1.40394
Ei24	0.818007	0.609033
Kif5b	0.817533	0.991812
Psmd2	0.817317	0.721629
Mtdh	0.816788	1.11758
Txnl4a	0.81669	0.347558
Pak1	0.816166	0.606927
Igfbp5	0.815331	1.00426
Timm17a	0.81516	0.744185
mt-Atp8	0.814971	1.13075
Rbm5	0.813942	1.80914
Zfp207	0.813766	0.934596
Azin1	0.813402	0.54315
Ost4	0.813343	0.284069
Gars	0.8132	0.432978
Zcchc17	0.813195	0.345167
Mcrs1	0.813009	0.298786
Hist3h2a	0.812635	0.116552
Hdac11	0.811979	0.880409
Pam	0.811104	1.14445
Camk1	0.810269	1.03908
Fam131c	0.809715	0.0895803
Apc	0.809583	0.980538
Eif4g1	0.808457	1.39326
Wdr83os	0.808398	0.585454
Rhoa	0.80792	0.831527
Rab12	0.807875	0.499842
Tceb1	0.807814	0
H2afv	0.807741	0.192496
Ola1	0.807621	0.456212
Pmm1	0.807296	0.548442
Nktr	0.807105	1.90053
Ifngr2	0.80681	0.334193
Snn	0.806789	0.200051
Ubald2	0.806467	0.227721
Ensa	0.806086	0.671337
Mrpl11	0.805949	0.550307
Pou2f2	0.804424	1.36943
Aprt	0.804375	0.431448
Bloc1s2	0.804255	0.266528
Mrpl23	0.804182	0.417296
Bclaf1	0.80409	1.39493
Phax	0.803793	0.446578
Pde6d	0.803242	0.319984
Ddx3x	0.802016	0.961289
Rbm17	0.801729	0.397712
C130021I20Rik	0.80133	0.0216292
Laptm4a	0.801295	1.23313
Pdlim7	0.801189	1.09366
Btbd1	0.801177	0.379272
Ubxn4	0.800602	0.964961
Cnpy2	0.80022	0.926409
Tmem191c	0.799362	1.38893
Igsf8	0.799264	0.909926
Banf1	0.798967	0.281325
Napa	0.797699	0.975565
Cdv3	0.797401	0.521351
Map7d1	0.796458	0.93609
Atp6v1c1	0.796371	0.344562
Pura	0.795863	1.12984
Emc4	0.795816	0.90627
Msmo1	0.795406	1.22435
Acin1	0.795076	1.08291
Bin1	0.795064	1.43554
Paip1	0.794446	0.321854
Actr10	0.794324	0.89384
Taf10	0.794294	0.309478
Fam96b	0.793875	0.540347
Eif3g	0.793642	0.393635
Sf3b5	0.793614	0.550776
Slc38a2	0.793559	2.03213
Psmd11	0.793423	0.838402
Hk1	0.793418	0.664988
Ppp2r2d	0.792812	0.716836
Mrps15	0.792522	0.512061
Pianp	0.792302	1.00242
Acbd6	0.792253	0.65427
Plekhj1	0.792184	0.701693
Mgat4b	0.792141	0.691654
Cops8	0.791858	0.562939
Mrps36	0.791787	0.290039
Abi2	0.791652	1.25523
Tenm2	0.791545	0.928429
Gramd1a	0.791091	1.56543
Mtpn	0.791063	0.528426
Pdha1	0.790744	0.194349
Psmc1	0.790485	0.543391
Eif3m	0.79004	0.355334
Ddost	0.789568	1.25461
Clstn3	0.789383	1.79109
Mpnd	0.788732	0.398034
Ubl3	0.788169	0.928543
A2ml1	0.788032	0.177954
Phf14	0.787973	0.926308
Dbi	0.787792	0.472224
2410002F23Rik	0.787054	0.747642
Polb	0.786278	0.914354
Rps19bp1	0.785527	0.209225
Pum2	0.785395	0.644396
Herc1	0.785138	1.60708
Sap18	0.784568	0.560614
Celf6	0.784368	0.741694
Suclg1	0.783723	0.612437
Jun	0.783365	1.2263
Glrx2	0.782818	0.422744
Phip	0.782783	1.46347
Rimklb	0.782768	0.611248
Vapb	0.782428	0.438854
Gnl3l	0.782196	0.731944
Tceal3	0.781923	0.898826
Rab5a	0.781483	0.494252
Camk2g	0.781365	0.902876
Nop56	0.780802	1.46418
Lamtor1	0.780603	0.227189
Akt1	0.780355	0.470722
Taok3	0.780297	0.615347
Csrnp3	0.780146	1.10364
Supt4a	0.779896	0.351376
Gabrg2	0.779432	1.06907
Dync1li1	0.778823	0.637957
Zmynd11	0.778816	1.32473
Clcn4	0.778714	0.498521
Sptssa	0.778568	0.428363
Prkce	0.778124	0.765142
Sae1	0.778053	0.223917
Sult4a1	0.777804	0.841476
Ids	0.777679	0.878664
Kras	0.777386	0.535872
Tmem14c	0.777339	0.891681
Cdk16	0.777153	0.744653
Lsm5	0.777023	0.410484
Pcdh10	0.776303	0.909704
Mapk10	0.776217	1.12118
Tiprl	0.776033	0.51437
Mrps18a	0.775649	0.346974
Cyp51	0.775373	1.01607
Ptprd	0.775332	2.04083
Manbal	0.774902	0.525862
Hdgfl3	0.77425	0.765327
Wasf1	0.774037	0.386904
Glyr1	0.773488	0.950645
Tmem29	0.772601	0.484997
Rbm8a	0.77258	0.33718
Fam110b	0.772504	0.438951
Nt5c3	0.772367	0.473862
Akirin1	0.772054	0.512062
Lrrn3	0.771778	0.7503
Tmem183a	0.771754	0.389741
Fyttd1	0.770987	0.682993
Sin3b	0.770581	0.786924
Aimp1	0.770247	0.551296
Polr2g	0.77018	0.467274
March1	0.769137	0.907709
Cops4	0.769124	0.526607
Txndc15	0.768513	0.926924
Shd	0.768219	0.43564
Vps35	0.767468	0.704141
Agap3	0.766942	0.871659
Uncx	0.766657	0.32933
Ahsa1	0.766433	0.629026
Aamp	0.76617	0.696356
Fopnl	0.765772	0.388496
Fam104a	0.764998	0.548654
Sod1	0.764961	0.906876
Cs	0.764867	0.422944
Pigt	0.764578	0.861014
D430019H16Rik	0.764568	0.738931
Polr3k	0.764253	0.318439
Zfos1	0.764198	0
Klhl1	0.764179	0.396105
Pfkp	0.764132	1.72446
Cxx1b	0.764005	0
Ccdc28b	0.763186	0.590228
Brd2	0.76281	0.828405
Hprt	0.762752	0.798319
Plppr1	0.762637	0.373846
Acly	0.762257	0.581405
Cldnd1	0.762224	0.896682
Tenm1	0.762038	1.3762
Med30	0.761912	0.407939
Chmp1a	0.760996	0.411512
Ube2ql1	0.760956	0.335331
Pdia6	0.760814	1.33207
Macrod2	0.760798	0.672329
Slirp	0.760792	0.584281
Gm47283	0.760648	2.74752
Ssna1	0.760005	0.525688
Tra2a	0.759972	1.19298
Dusp8	0.759217	0.542723
Rab24	0.759069	0.903279
Comt	0.758692	0.788181
Kdelr1	0.758631	0.945417
Sdhc	0.758423	0.534047
Rnf165	0.758048	0.342082
Cnih1	0.757853	0.664764
Trappc1	0.757287	0.329733
Arl2	0.756711	0.545186
Pnn	0.756355	1.38848
Got1	0.756275	0.630711
Anapc13	0.756085	0.362946
Mrpl51	0.755946	0.358364
Eif4g3	0.755816	1.05626
Armc1	0.755334	0.541249
0610010F05Rik	0.755263	0.577252
Atl1	0.755058	1.27282
BC005537	0.75474	1.01944
Cep170	0.754466	0.839406
Mocs2	0.754435	0.345224
Ap1ar	0.754217	0.389122
Lrpap1	0.754173	1.52111
Tmem160	0.753514	0.548616
Dctn6	0.752906	0.411394
Clasp2	0.752679	1.18047
Tnik	0.752485	1.56891
Kif21a	0.752288	0.888128
Micu3	0.752165	0.714998
Timm17b	0.751626	0.402396
Pdhb	0.751434	0.956574
Fbxw2	0.750859	0.449607
Fam168b	0.749932	0.472262
Celf3	0.749236	1.11626
Cox19	0.748668	0.382631
Psmd14	0.748578	0.457546
Ankrd11	0.748076	1.02226
Tomm70a	0.747688	0.751089
Sec11a	0.747067	1.01845
Pole4	0.746798	0.195141
Serpini1	0.74652	0.558641
Grpel1	0.745787	0.406137
Tmem126a	0.745741	0.449342
Rpp21	0.745635	0.749966
Ap4s1	0.744454	0.251343
Snf8	0.743637	0.36469
Tmem63b	0.743628	1.2984
Raf1	0.743612	0.885512
Cdc37	0.743542	0.627613
Sgip1	0.743408	1.36185
Otub1	0.743022	0.557692
Slc48a1	0.742894	0.50249
Atp6v1h	0.741728	1.01386
Stx1b	0.741598	0.792795
Prkar2a	0.741494	0.755945
Spag7	0.74148	0.436577
2700094K13Rik	0.741472	0
Snrnp27	0.741402	0.296209
Ogt	0.741251	1.05512
Wtap	0.740715	0.350682
Nipsnap1	0.74056	0.466953
Inpp4a	0.740206	1.16404
Bag6	0.7401	0.769186
Ntrk2	0.739836	1.82013
Hnrnpl	0.739706	1.0569
Hspa9	0.739279	0.708162
Ergic2	0.739148	0.818064
Sh3gl2	0.738152	0.602924
Grcc10	0.738116	0.163117
Ciapin1	0.737429	0.374738
Fam3c	0.737132	0.520828
Adrm1	0.736473	0.843685
Klf6	0.736389	0.871952
Car10	0.735954	1.44286
Anks1b	0.735784	0.866125
Tmx1	0.735542	1.17875
G3bp1	0.735467	0.91379
B230209E15Rik	0.735241	1.71236
Nxph4	0.735153	0.223041
Pa2g4	0.734607	0.382746
Papola	0.73458	0.656305
Hdac3	0.734457	0.985488
Sdhaf4	0.734054	0.265382
Fry	0.733897	1.40072
Tln1	0.733843	0.489449
Wbp4	0.73296	0.533185
Bhlhb9	0.732705	0.514029
Rex1bd	0.731473	0.484652
Shisa4	0.730837	0.669748
Stx1a	0.730567	0.657865
Dnajc19	0.730381	0.448881
Anp32a	0.730316	0.541238
Ttyh3	0.730149	0.67185
Clpp	0.730066	0.598029
Scg3	0.729861	0.937569
Zrsr2	0.729673	0.337243
Mydgf	0.729502	0.872966
Vps28	0.729397	0.745529
Rab5c	0.729059	0.241026
Rcan2	0.728811	0.196844
Epm2aip1	0.72805	0.978862
Mtfr1l	0.728037	0.714867
Wac	0.727812	0.969465
Cdc42se2	0.727735	0.480086
Txndc9	0.727717	0.529191
Rgma	0.72765	0.248793
Cnot7	0.727465	0.609073
Smarcd1	0.727369	0.123447
Gabbr2	0.726939	0.683223
R3hdm1	0.726682	1.56884
Ttll1	0.726274	0.367959
Prr3	0.725994	0.645779
Hp1bp3	0.725849	0.450403
Gmfb	0.725833	0.597821
H2afj	0.72555	0.590958
Rbm18	0.725406	0.324029
Gemin7	0.724996	0.256858
Nova2	0.724492	0.87151
Ppp2r5b	0.724419	0.616871
Hsdl1	0.724145	0.55884
Dctn1	0.724102	1.14655
Mrps12	0.723812	0.693572
Ssbp2	0.72376	1.07874
Gpbp1	0.723613	0.51712
Prkar2b	0.723084	0.532099
Lamtor5	0.723027	0.294013
Tspan17	0.722809	0.728696
Lypd1	0.722595	0.303167
Dzip3	0.722487	1.24822
Lrrc58	0.722315	0.687352
Ctsl	0.721803	1.39447
Eif3d	0.721795	0.508541
Syt5	0.721713	1.03423
Eif6	0.721662	0.305634
Tceal8	0.721573	0.605098
Egln2	0.72119	0.450081
Sdha	0.720688	0.960793
Mgea5	0.720373	0.541104
Mcrip1	0.720212	0.554597
Arf2	0.719326	0.281742
Tmem35	0.719298	0
Praf2	0.719226	0.389822
Glud1	0.717842	0.483837
Idh3a	0.717655	0.486013
Tanc2	0.717552	1.64255
Lasp1	0.717448	0.565534
Cdh2	0.717353	1.06197
Gabrb1	0.716974	1.48515
Tpgs1	0.716827	0.474741
Frmd4a	0.716426	1.32452
Fam195b	0.716403	0
Atcay	0.716111	0.900422
Eif3l	0.715806	0.482997
Pld3	0.71455	1.33957
Commd1	0.71439	0.286113
Tac1	0.714207	1.01787
Tmem208	0.714161	0.769215
Impad1	0.713831	0.805675
Ankrd46	0.713181	0.430135
Epb41l1	0.712895	0.811868
Suds3	0.712859	0.557464
Tfg	0.712263	0.445007
Snrpb2	0.712134	0.253789
Clcn3	0.711979	1.41414
Kansl2	0.711247	0.574304
Cisd2	0.709824	1.22301
Apc2	0.709103	0.876004
Fzr1	0.708534	0.667197
Pabpn1	0.708303	1.81513
Mrps16	0.708209	0.340673
B3gat1	0.707739	0.453295
Tmem59l	0.707698	1.26726
Mrpl57	0.707081	0.318548
Rab3b	0.706666	0.45929
Chic2	0.706293	0.547624
Atf2	0.706023	0.674482
Tmem178b	0.705952	1.06578
Coro1c	0.705909	0.506323
Dnajc6	0.705666	0.623048
Cacna2d2	0.705646	1.07686
Atp2b2	0.705056	0.991252
Sdf2	0.704725	1.12522
Dpysl4	0.70453	0.567016
Nrsn1	0.704434	0.460165
Bud31	0.704358	0.339158
Rnf126	0.704301	0.769184
Trp53bp1	0.703925	1.15017
Pigp	0.703724	0.744037
Chd5	0.703607	1.0452
Snrpa	0.703151	0.45672
Brd4	0.703107	1.05271
Glra2	0.703052	0.393247
1810022K09Rik	0.702472	0.518104
Myo5a	0.701274	0.959813
Ncoa7	0.701154	0.703506
Tspyl1	0.701	0.581074
Carhsp1	0.7009	0.0887032
Jakmip1	0.700771	0.837621
Adgrl3	0.7006	1.68249
Atraid	0.700544	1.11285
Pdgfa	0.700478	0.848873
Emc7	0.700432	1.04444
Srsf10	0.700423	1.24543
Huwe1	0.700372	1.37476
Xpr1	0.698968	1.47415
Tmem57	0.698869	1.07575
Lcmt1	0.698804	0.395442
Ppp2r2a	0.6982	0.647397
Tmem151a	0.697914	0.695832
Trp53i11	0.697117	0.0862735
Poldip2	0.697103	0.367698
Plppr2	0.696541	0.760277
Srgap1	0.696128	0.594022
Polr2l	0.69602	0.294495
Gnb4	0.695753	0.739248
Clns1a	0.695504	0.357648
Sh3gl3	0.69544	0.406261
Tpr	0.695379	0.728008
Hacd1	0.695376	0.441958
B4gat1	0.695362	1.36111
Spag9	0.695001	1.08352
Astn1	0.694486	1.12615
Map7d2	0.694359	0.560594
Tmem179	0.694059	1.29197
Ppp1r14c	0.69373	0.28677
Chd4	0.693496	1.38755
Cacfd1	0.69299	0.422913
Zmat2	0.692866	0.32967
Clptm1l	0.692511	0.742569
Ctnna2	0.692326	0.544761
Naa20	0.692105	0.666258
Nell1	0.69137	0.829981
Fem1b	0.691117	0.608878
Pid1	0.69108	0.526593
Golga7	0.690649	0.452769
Nudcd3	0.6902	0.899939
Dpm2	0.690039	0.625117
Pdcd10	0.690027	0.580056
4833439L19Rik	0.690025	0.456935
Nudt19	0.689699	0.196981
Fam155a	0.689533	1.22017
Tnrc6a	0.689497	1.56835
Rtraf	0.689243	0.635271
Vps72	0.688759	0.234968
Dnm3	0.688744	1.09847
Tax1bp1	0.688612	0.488633
Mrps6	0.688595	0.464055
Lonrf2	0.688265	0.666556
Dctpp1	0.688161	0.149668
Atg12	0.687914	0.351858
Nlgn2	0.687637	0.934725
Cab39	0.687403	0.780219
Slc30a9	0.687018	0.753101
Med10	0.686701	0.324551
Rbm42	0.686466	0.360691
Maf1	0.6863	0.301794
Kif21b	0.686248	0.963101
Trim44	0.68612	0.738739
Nap1l3	0.686027	0.450024
Rgs10	0.685337	0.331189
Cul1	0.685331	0.607841
Sec23a	0.684945	0.350323
Mvb12b	0.684762	0.430634
Fam117b	0.684709	0.458099
Gaa	0.684514	2.04941
Gpr27	0.684469	0.629247
Purb	0.68424	0.926614
Rogdi	0.683516	1.05982
Elp5	0.683505	0.387009
Phb	0.683429	0.800818
Fam168a	0.683205	0.869315
Cdo1	0.683014	0.222896
Mthfd2l	0.681905	0.365171
Psmd1	0.681897	0.666112
Rpn2	0.681561	1.14036
Timm10	0.68138	0.267447
Gls	0.680786	1.70151
Inafm1	0.680588	0.435984
Slbp	0.680394	0.65805
Stk16	0.679983	0.607399
Maea	0.679878	0.731289
Gfod2	0.67973	0.545381
Sqstm1	0.679528	0.694346
Tpm1	0.679524	0.452376
Gdap1	0.679395	0.730301
1500009L16Rik	0.679212	0.550322
Bub3	0.679069	0.561526
Apex1	0.678844	0.224643
Eif4b	0.678826	0.701904
Mrpl27	0.678133	0.272152
Msi2	0.67813	1.31329
Idi1	0.677779	0.536145
Zyg11b	0.677777	0.555219
Dbnl	0.677389	0.560727
Vgf	0.677358	2.22097
Lrrc59	0.677353	0.333424
Ddx17	0.677231	1.22196
Psmc3	0.677176	0.440243
Mrpl54	0.676953	0.316251
Adh5	0.676917	0.266714
Ptpra	0.676729	0.98093
Ablim3	0.676701	0.757291
Tmed7	0.676352	0.679095
Ghitm	0.676311	0.523599
Srp72	0.676195	0.571502
Pum1	0.676138	0.820951
Nyap1	0.67608	0.673676
Churc1	0.675916	0.397743
Kdm2b	0.675111	0.462293
Stard7	0.675003	0.512452
Rabep1	0.674958	0.639192
Pgap1	0.673948	1.12913
Prrc2a	0.673918	0.931961
Rbbp4	0.673846	0.485523
Nsa2	0.673814	0.270423
Lingo2	0.67376	1.13437
Asic2	0.67314	0.701364
Ehbp1l1	0.672234	0.712089
Tceal9	0.672201	1.57529
Aktip	0.670706	0.736438
Plekhb2	0.67014	0.594466
Bptf	0.669751	1.38395
Ap2a1	0.66962	0.857282
Eif2s3x	0.669103	0.367
Iscu	0.669081	0.484455
Cops5	0.669054	0.352304
Tmem145	0.668848	1.26109
B4galt2	0.668227	0.372475
Fnta	0.668157	0.510789
Tbpl1	0.667987	0.222203
Rtl8b	0.667943	0.560334
Aldh1a1	0.667836	0.0309778
Fmc1	0.66769	0.400614
Mapk3	0.667639	0.601788
Elmod1	0.667039	0.77334
Cpsf6	0.667006	0.815725
Adap1	0.667003	0.742539
Prdx3	0.666999	0.140097
Zfp771	0.666816	0.390686
Tm9sf3	0.666816	0.655393
Mrps34	0.666558	0.525628
Mrps14	0.666363	0.456344
4930402H24Rik	0.666102	1.21004
Cdk5r2	0.66597	0.474773
Ddx6	0.665923	0.728906
Hpca	0.665576	0.147534
Hes6	0.665442	0.21415
Hnrnpm	0.665001	0.74763
Celf1	0.664866	0.960382
[truncated: 17,102 more rows]

## Sheet: Cluster 2
Figure 2 - Source Data 2 (corresponding to Figure 2G, cluster 2). Average gene expression [exp(logNormalized counts)-1)]
obtained from the Seurat analysis of the two subclusters 2-1 and 2-2 derived from reclustering of Cluster 2. Pomc(med)/Ebf1
Gene expression data are sorted based on highest to lowest for subcluster 2-1 starting with Malat1
Subcluster:	2-1	2-2
Gene
Malat1	4.87306	5.12078
mt-Atp6	4.72324	4.32796
Tuba1a	4.71563	5.26431
Tmsb10	4.44015	4.45875
mt-Co3	4.2974	4.01367
Tmsb4x	4.2277	4.26819
Stmn1	4.04577	4.2393
mt-Co2	4.04386	3.51293
mt-Co1	4.04384	3.63635
mt-Cytb	4.02864	3.60316
Nnat	3.99112	3.98008
Eef1a1	3.97078	4.09189
Tubb2b	3.95362	4.30081
Actb	3.93569	3.9182
Actg1	3.87021	4.27324
Ubb	3.7934	3.82468
Tubb5	3.77935	4.13114
Meg3	3.7551	3.31219
Rtn1	3.68026	3.61488
Rpl41	3.58899	3.46926
Stmn2	3.5865	3.62638
Pcsk1n	3.55394	2.81049
mt-Nd1	3.55247	3.58488
Ptma	3.54376	3.96477
Ftl1	3.52793	3.92442
Ppia	3.51808	3.45574
Tubb3	3.50523	3.85855
Hspa8	3.32594	3.25428
mt-Nd4	3.29459	3.07564
H3f3a	3.28388	3.6656
H3f3b	3.21626	3.48502
Hsp90ab1	3.20949	3.24728
Rpl13	3.15774	3.05624
Basp1	3.15433	2.94017
Stmn3	3.14235	3.01018
Rps24	3.13584	2.9945
Rpl37a	3.12934	2.95485
Gap43	3.11092	3.01322
Gnas	3.10208	2.99772
Rps29	3.10088	2.97928
Calm2	3.07652	2.88121
Rps27a	3.06975	2.9712
Rpl32	3.06824	3.06789
Rps2	3.03559	2.72191
Marcksl1	3.02915	3.21538
Tpt1	3.02342	3.13312
Rps7	3.01951	3.03042
Rpl9	3.01489	2.95263
Rpl37	3.00685	2.81373
Rps8	2.99361	3.03162
Rpl23	2.99045	2.94123
Tubb2a	2.99026	2.56078
Rpl6	2.98603	2.92174
Map1b	2.97394	3.31461
Rpl10	2.96354	3.14939
Rps5	2.96008	2.95261
Rpl19	2.94873	2.84707
Rps19	2.94701	2.89193
Rpl21	2.94531	2.93408
Rpl3	2.94479	2.78321
Ly6h	2.94358	2.21936
mt-Nd2	2.92603	2.42724
Rpl11	2.92461	2.93862
Rplp0	2.92304	2.92033
Rps4x	2.91539	2.97828
Cfl1	2.90496	3.21217
Eif1	2.89951	2.98115
Fau	2.8852	2.80599
Rpl39	2.88233	2.8172
Rpl38	2.8759	2.71659
Rps3a1	2.87441	2.84136
Rpsa	2.86336	2.57569
Bex2	2.85638	2.31148
Rps14	2.84562	3.02593
Rps27	2.84496	2.76706
Rps23	2.8371	2.91386
Rps18	2.82944	2.88241
Rpl18a	2.81612	2.95181
Rpl26	2.8108	2.86638
Rpl8	2.8059	2.82849
Rps3	2.80387	2.86931
Rps11	2.8009	2.89031
Calm1	2.78523	2.56496
Snhg11	2.78222	2.2656
Rpl35a	2.77748	2.58038
Rps15a	2.7692	2.8798
Rpl24	2.76663	2.73715
Rpl27a	2.76381	2.60786
Ybx1	2.75127	2.81828
Rpl14	2.74574	2.83041
Gapdh	2.74025	2.76362
Eef2	2.73599	3.1285
Uchl1	2.73598	2.57061
Chchd2	2.72416	2.53015
Rpl17	2.7199	2.89132
Rps13	2.7122	2.62331
Rps16	2.70715	2.65898
Ywhae	2.70059	2.81481
Slc25a4	2.69327	2.59399
Rpl13a	2.68821	3.15151
Mllt11	2.67544	2.80712
Ndn	2.67494	2.29301
Rps28	2.67231	2.45189
Ttc3	2.66884	2.40201
Rplp2	2.66685	2.64024
Rpl36	2.66513	2.48949
Sumo2	2.65324	2.78086
Rps9	2.64762	2.78575
Rpl34	2.63829	2.67408
Rpl29	2.63723	2.66907
Atpif1	2.61391	2.55639
Rps6	2.61243	2.85714
Fth1	2.61094	2.498
Rps10	2.61029	2.56764
Rplp1	2.60953	2.55705
Rpl35	2.58225	2.49655
Rpl15	2.57532	2.11673
Prdx2	2.56511	2.81914
Fabp5	2.5615	2.40818
Cox7c	2.5579	2.32543
Rpl7	2.55671	2.80315
Fxyd6	2.53554	1.8613
Rpl18	2.52174	2.48384
Rpl4	2.52026	2.68199
Ptms	2.49264	2.69144
Rps26	2.48428	2.48356
Hint1	2.48398	2.20049
Gm1673	2.48395	2.33642
Cox8a	2.48355	2.30912
Cox4i1	2.48181	2.67523
Ndufa4	2.47208	2.21926
Ywhaq	2.46887	2.58267
Pebp1	2.43653	2.47822
Rps21	2.43341	2.06698
Rps17	2.43	2.59629
Rps20	2.42274	2.32599
Rpl30	2.41747	2.11601
Hsp90aa1	2.41574	2.56616
Ncam1	2.41535	2.20208
Rpl31	2.39908	2.57008
Rpl10a	2.393	2.36461
Snrpn	2.38988	2.26295
Pomc	2.38478	1.00677
Pfn2	2.38185	2.35223
H2afz	2.38088	2.25702
Naca	2.3704	2.40548
Ina	2.36819	3.07667
Sepw1	2.36589	2.73912
6330403K07Rik	2.35926	2.19117
Rps15	2.35381	2.58711
Rpl28	2.35114	2.40721
Oaz1	2.34964	2.32783
Mapt	2.33613	2.29764
Gnb1	2.33453	2.23412
Gng3	2.33394	2.23686
Cox6b1	2.3337	2.30274
Nefl	2.3313	2.29286
Crabp1	2.32456	2.05486
Rpl22l1	2.3238	1.76249
Dynll1	2.31616	2.47787
Ywhah	2.31167	2.10823
Sox11	2.3074	2.85602
Pgrmc1	2.30267	2.18739
Nap1l5	2.29575	1.4089
Atp5e	2.29491	2.07163
Gnb2	2.29018	2.35596
Dpysl2	2.28452	2.24345
Rps25	2.28057	2.28192
Calm3	2.27846	2.3184
Nme1	2.27657	2.216
Eef1g	2.26688	2.55568
Cox6c	2.26566	2.17249
Mif	2.26372	2.19417
Cd24a	2.2568	3.09267
Rpl7a	2.25463	2.40963
Sub1	2.25051	2.0853
Hnrnpa1	2.24473	2.57658
Map1lc3a	2.23305	1.98418
Nsg1	2.22287	2.22979
Eif4a1	2.21813	2.53574
Marcks	2.20857	2.22945
Rps12	2.20295	2.18404
Selenow	2.20071	0.971263
Btf3	2.19091	2.2394
Cox7a2	2.18935	2.1069
Rpl23a	2.1762	2.40263
Atp5b	2.17314	2.36295
Atp5j2	2.16294	1.98316
Tuba1b	2.15598	2.20824
Npm1	2.15469	2.18267
Cox5a	2.15379	2.181
Jund	2.15369	1.83555
Hn1	2.14262	2.58593
Mtch1	2.14181	1.99715
Morf4l1	2.1394	2.17945
Cox5b	2.13851	1.96224
Hnrnpk	2.1367	2.34738
Eif5a	2.12135	2.20683
Atp5l	2.11894	1.98039
Ptov1	2.11825	2.23436
Stmn4	2.11802	2.06481
Eif4g2	2.11762	2.40406
Tecr	2.09735	1.96534
Bex3	2.09382	0.73432
Atp5g1	2.09355	1.7714
Rnf187	2.09213	2.18756
Hmgb1	2.08997	2.15905
Xist	2.08392	2.09042
Cnih2	2.08182	2.24036
Sec61g	2.07418	1.97633
Zwint	2.06638	1.86376
Cdc42	2.06229	2.0887
Rpl12	2.05815	1.88558
Atp5f1	2.05174	2.11141
Usmg5	2.04761	1.76366
Eef1b2	2.04462	1.90605
Atp5h	2.04353	2.02426
Rpl36a	2.04241	2.02598
Pfdn5	2.03343	1.93234
Dnaja1	2.03218	2.14214
Ddx5	2.03109	2.32981
Tma7	2.02833	1.91435
Atp5j	2.02261	1.88057
Tsc22d1	2.01897	2.11497
Hsbp1	1.99644	1.88297
Dpysl3	1.99574	2.21365
Atxn7l3b	1.98668	2.02691
Eid1	1.9785	1.58825
Rpl27	1.97365	1.93766
Gsk3b	1.97305	1.94968
Sox4	1.96969	2.42277
Maged1	1.95643	1.81755
Ran	1.95055	2.02347
Atp5g3	1.94625	1.83146
Slc25a3	1.94113	1.93115
Clta	1.93783	1.78788
Myl6	1.93454	1.88196
Gabarap	1.93224	2.16937
Atp5g2	1.93053	1.88293
Atp6v1g1	1.92972	1.95595
Resp18	1.92429	1.42287
Fkbp1a	1.9204	1.97431
Erh	1.91815	2.18218
Ckb	1.91425	2.25594
Psma7	1.91375	1.99724
Crmp1	1.91369	2.22785
Atp1b1	1.91108	1.51115
Rab3a	1.90566	1.70386
Tbca	1.90141	1.63397
Bex1	1.89941	1.4068
Bsg	1.89544	1.7417
Ngfrap1	1.89541	2.20506
Tceb2	1.8947	2.21825
Srsf3	1.88913	2.01251
Celf4	1.88805	1.81909
Hmgn1	1.885	2.19775
Arf5	1.88488	1.84379
Cox6a1	1.88472	2.03151
Gpx4	1.88463	1.9431
Ahi1	1.88354	0.899016
Pfn1	1.88351	2.04634
Uqcrh	1.88242	1.90908
Morf4l2	1.88022	1.70954
Eif4a2	1.87691	1.89606
Ap2m1	1.87654	2.06824
Eif3f	1.87653	2.04371
mt-Nd3	1.87594	1.31288
Hnrnpa2b1	1.87511	2.1897
Cirbp	1.8725	1.80472
Ywhag	1.87069	1.84953
Atp6v0b	1.86944	1.60151
Mrfap1	1.8665	1.56493
Dynlrb1	1.86413	1.9301
Rtn3	1.86399	2.01398
Ywhab	1.86356	1.77684
Atp5a1	1.8606	2.06264
Cst3	1.8592	1.51317
Aplp1	1.85207	1.94668
Cpe	1.8383	1.88653
Pkm	1.8333	2.28799
Gabarapl2	1.82998	1.79804
Elavl4	1.82783	2.04943
Atp5c1	1.82062	1.70755
Atp5k	1.82	1.6515
Uqcrb	1.81473	1.64212
Uqcrq	1.81384	1.62895
Klc1	1.8133	2.0221
Tagln3	1.8108	2.18274
Elavl3	1.80955	2.04943
Ndufc2	1.80733	1.5096
Pafah1b3	1.80401	1.99939
Nefm	1.80214	1.93071
Swi5	1.80117	1.74619
Serf1	1.80021	1.9474
Peg3	1.79971	0.782136
Rac3	1.79751	1.5474
Ubl5	1.79394	1.64715
Elob	1.79034	0.553661
Caly	1.78712	0.929068
Ubc	1.78391	1.69558
Hmgb3	1.77852	1.99763
Eif3h	1.77701	1.85151
Ywhaz	1.77635	1.57702
Ndufb8	1.77283	1.62918
2010107E04Rik	1.77149	1.68679
Ndufa7	1.76495	1.6635
Evl	1.75848	1.88756
Rpl5	1.75102	1.9664
Hbb-y	1.74374	2.67179
Set	1.74228	1.7349
Rbm3	1.73463	1.73158
Ndufs5	1.73463	1.54437
Syt4	1.73461	0.837754
Rbx1	1.73104	1.79091
Cox7b	1.72312	1.58837
Tomm20	1.72109	1.61351
mt-Nd4l	1.71971	0.803097
Nedd8	1.71855	1.71684
Akr1a1	1.71595	1.61825
Thra	1.7155	1.41978
Vapa	1.71478	1.61454
Aldoa	1.71474	1.82601
Serbp1	1.71202	1.83582
Uqcr11	1.70903	1.54714
Psmb6	1.7036	1.72586
Ndufb9	1.70271	1.65869
Eif1b	1.70138	1.5922
Vamp2	1.69035	1.37906
Hspe1	1.69007	1.36568
Hap1	1.68913	0.814229
Jpt1	1.68749	0.439354
Dnajb6	1.68703	1.64767
Psma3	1.68228	1.68741
Prmt1	1.67736	1.86696
Podxl2	1.67366	1.46847
Ranbp1	1.67342	1.70529
Rab6a	1.67227	1.71439
Paip2	1.66975	1.85583
Vdac3	1.66396	1.43221
Rufy3	1.66199	1.74716
Fscn1	1.65821	2.01694
Sumo1	1.65371	1.67411
Psmb1	1.6533	1.69467
Ndufb5	1.653	1.51764
Smdt1	1.65111	1.61285
Romo1	1.64817	1.34991
Gdi1	1.64426	1.90807
Ube2e3	1.63778	1.99404
Vdac2	1.63297	1.53131
Tspan13	1.63287	2.39825
Nop10	1.6321	1.28112
Zcchc12	1.63076	1.1447
Ndufab1	1.63014	1.44066
Itm2b	1.6287	1.461
Arpc1a	1.62638	1.67561
Pfdn2	1.62502	1.46363
Rtn4	1.62366	1.60471
Atp5d	1.62067	1.64048
Rab2a	1.62016	1.64186
Ctbp1	1.61289	1.85415
Hist3h2ba	1.61005	2.28352
1110004F10Rik	1.60745	1.44572
Aes	1.60367	1.35857
Cox7a2l	1.60319	1.76634
Nrxn2	1.60209	1.28347
Ndufa3	1.60046	1.42676
Nsg2	1.59876	1.62982
Rpl36al	1.59823	1.64588
Vdac1	1.59275	1.66765
Pou2f2	1.59116	1.41076
Ndufa13	1.58828	1.41984
Dstn	1.58654	1.81092
Ndufa5	1.58603	1.25016
Arf1	1.58434	1.70466
Fkbp3	1.58156	1.4064
Pgam1	1.57885	1.48349
Cbx3	1.57739	1.5675
Snrpd2	1.57708	1.45659
Ndufv3	1.57592	1.37816
Serf2	1.5739	2.00158
Mdh1	1.57263	1.51237
Serp2	1.57235	1.05644
Nenf	1.5718	1.09789
Atp6v1f	1.5709	1.431
Srp14	1.56765	1.564
App	1.56679	1.4324
Ppp1ca	1.5659	1.74772
Ndufc1	1.56301	1.37585
Ube2d2a	1.56207	1.77284
Minos1	1.56064	1.51044
Gnb2l1	1.56022	2.00457
Snrpe	1.55996	1.67494
Arpc2	1.55911	1.54038
Cycs	1.5581	1.50411
Atxn10	1.55547	1.64324
Srsf2	1.5535	1.65697
Ube2s	1.55321	1.70546
Edf1	1.55184	1.4775
Dynll2	1.55165	1.49368
Fez1	1.55056	1.50848
Uqcr10	1.54978	1.35101
Scg2	1.54946	0.756713
Ube2d3	1.5493	1.67069
Mdh2	1.54887	1.64445
Txn1	1.54837	1.40894
Gpm6a	1.54518	1.39313
Ndufa11	1.54478	1.40436
Hmgcs1	1.5362	1.72106
Npdc1	1.53499	1.43712
Matr3	1.53049	1.44672
Ap2s1	1.52559	1.56327
Kif5c	1.52411	1.63001
Park7	1.52375	1.40065
Bex4	1.5215	1.02975
Ndufb2	1.52069	1.23425
Mlf2	1.51953	1.71258
Rpl22	1.51659	1.64184
Bri3	1.51638	1.58238
Arl6ip1	1.51622	1.45851
C1d	1.51094	1.30402
Tspan3	1.51068	1.62936
Cct7	1.51064	1.63588
Rnf7	1.51052	1.62235
Arpc5	1.51035	1.63325
Sms	1.50916	1.36338
Ctxn1	1.50894	1.4318
Pomp	1.50843	1.43414
Psmb5	1.50753	1.45127
Gabbr1	1.50624	1.6366
Ube3a	1.50443	1.30714
Ndufa2	1.50384	1.48605
Fis1	1.50266	1.54685
Cct5	1.49778	1.59787
Sec61b	1.4963	1.34966
Sncg	1.494	2.13624
Rbm39	1.49372	1.69371
Snrpg	1.492	1.41378
Pcp4	1.48855	2.19882
Zcchc18	1.48829	0.898031
Ndufa1	1.48685	1.2843
Scg5	1.48516	1.12193
Gng2	1.48515	1.3924
Psmb2	1.485	1.43979
Cd200	1.48468	1.16793
Atp2b1	1.48464	1.04669
Dad1	1.48311	1.33109
Ppp2ca	1.48288	1.42458
Ndufb11	1.48128	1.36806
Snrpd1	1.47964	1.39296
Map1lc3b	1.47867	1.77264
Tbcb	1.4771	1.44463
Cacybp	1.47563	1.30265
Nedd4	1.47364	1.49025
Timm8b	1.47314	1.38271
Gnai2	1.47202	1.23247
Cfl2	1.47056	1.43544
Reep5	1.46822	1.33844
Tcf25	1.4668	1.38414
Selenok	1.46636	0.397048
Dctn3	1.46519	1.44671
Ube2n	1.4646	1.57848
Dbn1	1.45994	1.60797
Tpi1	1.45715	1.47664
Serinc1	1.45617	1.31534
Pcbp2	1.45341	1.75511
Prmt2	1.45242	1.28853
Selk	1.45191	1.84958
Nrxn1	1.44983	1.21881
Ebf1	1.44942	2.20019
Anapc5	1.44611	1.53004
Calb2	1.44432	0.555005
Rab14	1.44356	1.4458
Bcas2	1.44272	1.33548
Vim	1.44233	1.42241
Erp29	1.44212	1.26901
Cct2	1.44017	1.53654
BC031181	1.43647	1.4139
Ndufb10	1.43532	1.37395
Eif3k	1.43389	1.57883
Gdi2	1.43346	1.63999
Pcbp1	1.43283	1.68683
Calr	1.43267	1.50212
Gnao1	1.43042	1.24047
Sdhb	1.42992	1.3859
Uqcrfs1	1.42877	1.46055
Crip2	1.42837	1.47711
Irs4	1.42797	0.0813532
Arf4	1.42777	1.64225
Tomm7	1.42627	1.19556
Prdx1	1.42609	1.1606
Ube2b	1.42596	1.42208
Zfp706	1.42582	1.30012
Ddah2	1.42466	2.09768
Myl12b	1.42436	1.33799
Map2	1.42426	1.45002
Ndufa6	1.42048	1.24928
Hras	1.41939	1.16254
Zfp428	1.41933	1.42337
Rab11b	1.4098	1.55768
Rheb	1.40887	1.25721
Rsrp1	1.40845	1.56174
Psma2	1.40726	1.40948
Slc25a5	1.40387	1.70703
Snap47	1.40313	1.185
Ank3	1.40204	1.35509
Hdac2	1.40131	1.71671
Pdcd5	1.40029	1.24941
Ube2m	1.39988	0.955693
Mrpl52	1.3991	1.21219
Hnrnpa3	1.39811	1.54581
Araf	1.3955	1.1374
Cnbp	1.39392	1.3412
Fkbp4	1.39351	1.4825
Psap	1.3915	1.41046
Polr2m	1.38766	1.36362
Isl1	1.3869	0.476749
Stub1	1.38682	1.23667
H2afy	1.38657	1.45268
Psmb3	1.38599	1.41895
Sf3b6	1.38429	1.42332
Fdps	1.38385	1.4169
Hnrnpdl	1.3795	1.6093
Psip1	1.37871	1.55568
Trappc4	1.37866	1.39647
Hnrnpab	1.37822	1.67878
Gria2	1.37554	0.986837
Mapre1	1.37411	1.51105
Cd81	1.37379	1.13734
Pcbp4	1.37121	1.69196
Eif3e	1.36997	1.50408
Timm13	1.36995	1.39361
Rabac1	1.3695	1.16177
Ndufb7	1.36921	1.40317
Acot7	1.36733	1.27122
Mrpl20	1.36549	1.26459
Tcp1	1.3649	1.57316
Ndufs6	1.36377	1.28146
Atp5o	1.3636	1.7396
Dctn2	1.36288	1.44585
Syt1	1.36271	0.792443
Arl8a	1.36171	1.15542
Ndufv2	1.36167	1.28404
Ndufa8	1.35785	1.13898
Syt11	1.35592	1.11979
Cisd1	1.35575	1.2761
Cadm1	1.35551	1.46467
Arhgdig	1.35157	0.600787
Mff	1.3506	1.37987
Prkar1a	1.35035	1.33047
Srrm2	1.35007	1.37768
Cmpk1	1.34937	1.34418
Tspan7	1.3493	0.695633
Ppdpf	1.34922	1.29892
Cct4	1.34598	1.5777
Ank2	1.34388	1.21602
Cotl1	1.34302	1.71962
Psmb7	1.3423	1.50105
Vcp	1.34139	1.40487
Syp	1.34029	0.900597
Arhgdia	1.34014	1.39558
Cbarp	1.34013	0.924944
Zdbf2	1.33921	0.52045
Rbfox2	1.33645	1.32212
Zfhx3	1.33326	1.12629
Slc22a17	1.33152	1.05101
Ndufa12	1.33087	1.18995
Hmgn2	1.33046	1.29706
H2afy2	1.32807	1.53982
Gpi1	1.32715	1.34813
Tusc3	1.32545	1.06745
Psmb4	1.3231	1.31871
Eif5	1.32309	1.48999
Ntm	1.3226	0.901509
Tsn	1.32185	1.26757
Kif1b	1.32126	1.13748
Uqcc2	1.32026	1.28489
Csnk1e	1.31742	1.43656
Ttc9b	1.31657	1.1576
Pdap1	1.31537	1.37154
Tsg101	1.31498	1.45359
Cct8	1.31095	1.37922
Vat1	1.30992	1.20663
Arpc3	1.30979	1.44189
mt-Nd5	1.30769	0.989957
Spcs2	1.30486	1.17774
Tppp3	1.30098	1.31661
Scand1	1.29893	1.18644
Brk1	1.29819	1.3569
Nono	1.2979	1.59191
Coa3	1.29547	1.16192
Fos	1.29377	0.295726
Nap1l1	1.2937	1.33356
Pak3	1.29327	0.80363
Gtf2h5	1.29153	1.16085
Atp6v0d1	1.2911	1.39374
Efna5	1.29065	0.489466
Fxyd7	1.29056	0.625169
Bax	1.28764	1.38837
Dcx	1.28726	1.65293
Wbp5	1.28716	1.5803
Chd3os	1.28639	1.05732
Snap25	1.28495	1.21817
Hnrnph1	1.28483	1.38323
Ndufs4	1.28379	1.24021
Dclk1	1.28314	1.21891
Ube2e1	1.28304	1.42442
Higd1a	1.28117	1.17283
C1qtnf4	1.27728	0.932486
Cetn3	1.27668	1.16776
Pfdn1	1.27636	1.24917
Dync1i2	1.2745	1.29813
Pabpc1	1.27129	1.42108
Spcs1	1.27129	1.07662
Rab6b	1.27044	1.15288
Trappc6b	1.27019	1.11353
Maged2	1.26851	1.03481
Ncl	1.26784	1.30135
Pbx1	1.26722	1.46402
Fkbp8	1.26554	1.33116
Ssb	1.26375	1.28872
Phb2	1.26299	1.29321
Prdx5	1.26146	1.1813
Map2k2	1.26083	1.47134
Idh1	1.26026	1.49184
Rrp1	1.26007	1.19718
Ndufb4	1.2593	1.16218
Tmeff1	1.25791	1.70556
Pafah1b1	1.25605	1.05423
Camta1	1.25519	1.09821
Arxes2	1.25408	1.00189
Sh3bgrl3	1.25352	1.39801
Cct3	1.25267	1.3381
Fus	1.25199	1.37584
Pgls	1.24931	1.21713
Prelid1	1.24875	1.31728
Nisch	1.24685	1.13054
Ppp3ca	1.24663	1.12523
D8Ertd738e	1.24626	1.14668
Csnk1a1	1.24514	1.24418
Cyb5a	1.24402	1.1581
Psma5	1.24379	1.16929
Snrpf	1.24304	1.2228
Klf7	1.24268	1.37449
Srsf5	1.24251	1.23779
Pja1	1.23897	1.07969
Cdk4	1.23852	1.70059
Peg10	1.23815	0.174074
Ube2v2	1.23548	1.28788
Gm42418	1.23436	0.684516
Apbb1	1.23433	1.26292
Rala	1.23246	1.27781
Tmod2	1.23243	1.15158
Txndc17	1.23125	1.11701
A730017C20Rik	1.23117	0.662523
Vbp1	1.23086	1.27043
Usp22	1.22977	1.04553
Glrx3	1.22912	1.37048
Sfpq	1.22831	1.42914
Capzb	1.22735	1.37786
Cfdp1	1.22733	1.07531
Saraf	1.22644	1.03705
2410015M20Rik	1.22604	1.02527
Higd2a	1.22534	1.17995
Tmed2	1.22521	1.20217
D930028M14Rik	1.22206	1.71376
Hcfc1r1	1.22186	1.04936
Rab10	1.21952	1.30178
Tubb4a	1.21787	1.44701
Mrpl34	1.21683	1.35781
Ppp2r1a	1.21466	1.3341
Ndufb3	1.21449	1.03108
Ptp4a1	1.214	1.35138
Sbk1	1.21313	1.61553
Fnbp1l	1.20976	1.1256
Itm2c	1.20926	0.956939
Olfm1	1.20618	1.95019
Prkacb	1.20599	0.7268
Eif3i	1.20509	1.1833
Zfand5	1.2041	1.40717
Eif2s2	1.20369	1.20303
Shfm1	1.20321	1.39975
Tmem59	1.20269	1.21968
Selenof	1.20216	0.336876
Rundc3a	1.19988	1.43322
U2af1	1.19964	1.24774
Wdr6	1.19864	0.994093
Hnrnpc	1.19824	1.39757
Celf2	1.19823	1.31257
Mapk8ip1	1.19678	1.21192
Psmd8	1.19669	1.39208
Zcrb1	1.19612	1.13291
Rab7	1.19602	1.22169
Asb4	1.1956	0.116219
Atp6v0e2	1.19352	1.01391
Ndufb6	1.19314	1.03999
Mpc2	1.19197	1.02258
Pafah1b2	1.19002	1.31135
Ldha	1.18927	1.19153
Ppp2r2b	1.18891	0.603926
Eef1e1	1.18858	1.14759
Rprm	1.188	1.21918
Tubb4b	1.18775	1.00069
Hnrnpa0	1.18723	1.03753
Guk1	1.18315	0.984409
Lamp1	1.18228	1.22994
Psma1	1.18184	1.22122
Tomm22	1.18161	1.28017
Sec62	1.18136	1.09797
Gabarapl1	1.18123	1.07432
Uchl3	1.18054	1.05719
Blcap	1.18005	1.08891
Cmas	1.17979	1.28617
Gpx3	1.17945	0.341694
Mettl9	1.17898	1.26844
Cxx1a	1.17815	1.43622
Prkaca	1.17699	1.24892
Metap2	1.17651	1.20439
Ldhb	1.17609	1.62722
Lamtor2	1.17549	0.954128
Dda1	1.17536	1.16862
Smim14	1.17498	1.16639
Drap1	1.17486	1.01391
Sptbn1	1.17479	0.914573
Mycbp2	1.17422	0.825139
Tmem130	1.17406	0.802035
Reep1	1.17359	1.14043
Polr1d	1.17252	1.18169
Psma6	1.17231	1.20687
Nhlh2	1.1714	1.99234
St13	1.17139	1.07015
Snrpb	1.17002	1.24922
Ptn	1.16994	0.627461
Bzw2	1.16937	1.49593
Tbx3	1.16934	0.0826971
Pten	1.16894	0.594676
Psma4	1.16868	1.35985
Myeov2	1.16827	1.42143
Ppp1r14b	1.16697	1.19501
Gprasp1	1.1668	0.798417
Stx7	1.1662	1.26183
S100a10	1.16542	0.851734
Csde1	1.16493	1.15191
Hnrnpu	1.16413	1.18486
Ptges3	1.16408	0.992806
Lsamp	1.16291	0.717935
Actr3	1.1621	1.23124
Stard3nl	1.16192	1.07947
Fabp3	1.15857	0.636464
Arl3	1.15838	1.23676
Caprin1	1.15516	1.36593
Snrpd3	1.15486	1.09364
Tmeff2	1.15482	0.913342
Stxbp1	1.1547	0.974479
Tcf7l2	1.15464	2.07553
Tsen34	1.15439	1.10667
Polr2f	1.15119	1.04537
Ndrg4	1.15	0.919489
Khdrbs3	1.14873	0.447657
Aprt	1.14528	0.665276
Ptprs	1.14493	1.02435
Atp1a3	1.14408	0.980608
Cdk5r1	1.14349	1.34149
Rnf10	1.1428	1.26853
Zbtb20	1.14207	0.903936
Eno1	1.14202	1.33675
Son	1.14142	1.25811
Mrpl33	1.14122	0.77507
Top1	1.14102	1.29846
Ier3ip1	1.13999	1.22676
Ypel3	1.13952	1.19125
Gm10076	1.13777	1.03262
Hspd1	1.13766	1.05745
Alcam	1.13636	0.489801
Capza2	1.13636	1.11883
Hsp90b1	1.13592	0.964394
Pam16	1.13584	1.00384
Pfdn4	1.13507	1.1486
Strap	1.13479	1.16097
Tmem234	1.13348	1.22379
Mien1	1.13267	1.19043
Trappc2l	1.132	1.02852
Camk2n1	1.1315	1.24797
Ddx39b	1.1315	1.18519
Atp6v1e1	1.13145	1.25523
Oaz2	1.13143	1.32061
G3bp2	1.12936	1.32825
Cmip	1.12883	0.962892
Ndufs7	1.12709	0.975303
2700060E02Rik	1.12709	1.55441
Uqcrc1	1.12643	1.24295
Sept7	1.12632	1.19967
Arpc5l	1.12581	0.876928
Gng5	1.12402	1.38557
Tmem258	1.1236	1.10327
Mkrn1	1.12287	1.32903
H1fx	1.12254	1.09921
Gtf2a2	1.1209	1.07029
Ssbp4	1.12081	0.947025
Scoc	1.1193	1.05223
Sptssa	1.11853	1.08609
Pnmal2	1.11826	0.691412
Uba52	1.11753	0.96894
Rnf14	1.11715	1.06471
Dusp26	1.11659	1.10908
0610012G03Rik	1.11418	1.06218
Rnf5	1.11398	1.35969
Ssbp3	1.11303	1.13093
Cyc1	1.11264	1.19034
Khdrbs1	1.10953	1.4135
Pcmt1	1.1083	0.977667
Gprasp2	1.108	0.714848
Cspg5	1.10746	0.687881
Ssr4	1.10633	0.854303
Raly	1.10459	1.37721
Camk2n2	1.10353	0.748342
Sumo3	1.10325	1.06401
Rack1	1.10308	0.248096
Akirin2	1.10221	1.31442
Dlgap4	1.10162	1.23199
Ppp1r1a	1.1016	0.734061
Rac1	1.10122	1.20992
Psmd7	1.10116	1.07886
Stx12	1.10102	1.13665
Rnf11	1.09982	0.90744
Pea15a	1.09961	0.665083
Srp9	1.09861	1.05898
Xpr1	1.09811	1.15758
Mpc1	1.09696	0.879289
Mgst3	1.09672	1.2143
Chgb	1.09628	0.792808
Ccl27a	1.09594	0.970762
Nrep	1.09461	1.443
Yeats4	1.09348	1.29194
Pcdh17	1.09325	0.632497
Srsf11	1.0932	1.18203
Inpp5f	1.09302	0.942267
Anapc11	1.09184	1.10203
Tmem256	1.09129	1.08882
Psd	1.09083	0.657813
Krtcap2	1.09069	1.0746
Bzw1	1.09055	1.24401
Arl6ip5	1.09037	1.16234
Tcaf1	1.0903	1.00446
Txnl1	1.08906	0.982062
Arxes1	1.08897	0.762201
Hmgcr	1.08895	0.839865
Trmt112	1.08821	0.949998
Plppr3	1.08817	1.32507
Vps29	1.08735	0.997569
Ube2d1	1.08733	1.40291
Prnp	1.08678	0.958513
Calb1	1.08673	0.642282
Acat2	1.08664	1.31521
Zc3h15	1.0865	1.16245
Hdgf	1.08612	1.08641
Mrps21	1.08525	1.08995
Acp1	1.08509	0.950647
Psmc5	1.08437	1.15835
Tspyl4	1.0841	0.904831
Psmd4	1.0841	1.14776
Nav1	1.08377	0.821241
Ergic3	1.08372	1.11516
Nudc	1.08257	1.03028
Srsf7	1.08255	1.21622
Ubxn1	1.08167	1.03139
Ppp1cc	1.08148	1.38508
Cuedc2	1.08126	1.0952
Esd	1.08118	1.04672
Pin1	1.08039	1.08314
Canx	1.07812	0.873502
Emc6	1.078	0.993977
Skp1a	1.07753	1.0858
Ociad1	1.07642	1.07409
Cnrip1	1.07636	0.947194
Uqcrc2	1.07605	0.996851
Ndfip2	1.07567	1.06121
Ap1s2	1.07406	0.776176
Efnb3	1.07405	0.776509
Scd2	1.07349	1.16234
Sem1	1.07263	0.259605
Pdia3	1.07133	1.04912
Bbip1	1.07019	0.96375
Tmem50a	1.07016	1.09635
Cdkn1c	1.06977	1.74207
Chmp5	1.06779	1.16153
Ap1s1	1.06773	1.06102
Arl2bp	1.06713	1.27713
Tceal9	1.06706	0.206897
Gstm5	1.06563	0.993984
Crabp2	1.06403	2.16319
Laptm4a	1.06361	0.995618
Rab18	1.06196	1.10016
Chchd1	1.06194	0.991547
Ubqln2	1.06135	1.11697
Myef2	1.06092	1.04591
Emc10	1.06065	1.1103
Klhdc2	1.06043	1.12244
Srsf6	1.05981	1.17096
Ube2i	1.059	1.21365
Atp6v1b2	1.05871	0.940346
Nrsn1	1.05862	0.628304
Ap3s1	1.05845	1.33623
Dnajc5	1.05779	0.978863
Rab11a	1.0572	1.25324
Grina	1.05604	1.2152
Arpp19	1.05572	1.03645
Lsm7	1.05571	0.657962
Atp6v1d	1.05499	1.01521
Akap9	1.05414	1.06601
Tsnax	1.05405	0.95824
Rcn2	1.05249	1.22455
Dlk1	1.05218	0.81226
Sept3	1.05149	0.956149
Psenen	1.05121	1.04672
Alg2	1.05095	0.988092
Dnaja2	1.05082	1.06924
Rhob	1.0504	0.808243
Atox1	1.05037	1.15542
Polr2k	1.04981	0.999933
Fdft1	1.04863	1.30336
Hnrnpr	1.04829	1.25304
Polr2j	1.04816	1.03562
Rraga	1.04718	1.12451
Denr	1.04417	1.00746
Chmp2a	1.04404	0.989262
Pmvk	1.04389	0.957033
Gnaz	1.04307	0.830626
Ccdc88a	1.04303	0.996974
Kmt2e	1.04201	1.16713
Snx3	1.04166	1.0604
Ndufs2	1.04165	1.1455
Fam171b	1.04157	0.780917
Acat1	1.0415	0.852167
B630019K06Rik	1.04143	0.735933
Tkt	1.04112	1.03101
Eef1a2	1.04031	0.685834
Mrpl30	1.03997	0.987355
Rab1a	1.03917	1.13943
Glrx5	1.03889	0.884097
Hmgn3	1.03842	0.474985
Pja2	1.03841	0.81638
Mrpl12	1.03702	0.936856
Prrc2c	1.03662	0.780187
Bag1	1.03544	1.08717
Cltb	1.03482	0.760146
Nipsnap3b	1.03439	1.03125
Cited2	1.03398	1.37368
Luc7l3	1.03355	1.04986
Hspa5	1.03296	0.978613
Atrx	1.0329	0.935531
Nbdy	1.03144	0.253757
Ssu72	1.03037	1.06697
Pcbd1	1.03008	0.645974
Atat1	1.02927	1.44991
Mrpl54	1.02875	0.924983
Mrps33	1.02834	0.993868
Rhoa	1.02817	0.965493
Chl1	1.02705	0.663369
Tmx4	1.02694	0.704689
Capns1	1.02634	1.02522
Runx1t1	1.02602	1.26443
2210016L21Rik	1.02582	0.770564
Negr1	1.02563	0.722228
Smarcd3	1.02446	0.852734
Cbx5	1.02386	0.956938
1500011B03Rik	1.02203	0.959559
Sfxn1	1.02178	0.8165
Pkia	1.01986	0.890436
Ctnnbip1	1.0184	1.16111
Csnk2b	1.01787	1.10261
Prkar1b	1.01751	0.764701
Dner	1.01691	1.00257
Eif4e	1.01671	1.0252
Ube2r2	1.01612	0.943468
Trim35	1.01604	1.13261
Bnip3l	1.01437	1.27533
Tia1	1.01337	1.18568
Eri3	1.01281	0.826816
Ppib	1.01163	1.2438
Mageh1	1.01138	1.06727
Actl6b	1.01137	1.20225
Ilf2	1.01094	1.30524
Slc24a5	1.01038	0.920381
Mat2a	1.00957	1.05594
Cript	1.00832	1.18021
Pfdn6	1.00777	0.980978
Mbd3	1.0065	1.0738
Gnaq	1.00643	0.858226
Gde1	1.00635	0.910975
Rps27l	1.00355	0.982813
Luc7l2	1.00312	0.979276
Ndufs3	1.00261	0.980376
Eif3a	1.00242	0.912323
C1qbp	1.00078	0.917971
Fam96b	0.99896	0.889533
Sf3b2	0.998654	1.07582
Manf	0.998596	0.892807
Ppp1r2	0.998364	0.934689
Nptn	0.997556	0.77913
Svbp	0.997356	1.23869
Islr2	0.99699	1.68759
Brwd1	0.996544	1.22773
Smarce1	0.996394	1.34032
Kcnq1ot1	0.99604	0.784957
Hypk	0.99566	0.802312
Bola2	0.995219	0.867781
Ndufa10	0.994509	1.00928
Ctsl	0.993675	0.792751
Kif1a	0.992772	0.789103
Fam32a	0.99253	1.0019
Arglu1	0.992021	0.893769
Smarcb1	0.991521	1.18283
Ewsr1	0.991013	1.21304
Fam103a1	0.990997	1.06683
Lsm4	0.990645	1.02277
Rit2	0.990301	0.346847
Sfr1	0.990292	0.966456
Rbm4b	0.989964	1.16485
Fubp1	0.989572	1.2134
Tpm3	0.989441	1.00781
Gm16286	0.989266	0.966794
Tprgl	0.988277	1.10898
Ube2l3	0.988173	0.985469
Nabp2	0.988013	0.968284
Rnps1	0.987487	1.08803
Zfr	0.986872	0.722908
Rbm25	0.986701	1.052
Cyth2	0.986651	1.40182
AW551984	0.986408	0.398419
Fam171a2	0.985426	0.963331
Fkbp2	0.985039	0.722046
Mapre2	0.983826	0.952669
Uba1	0.982487	1.34014
Btf3l4	0.98234	1.31595
2900011O08Rik	0.982041	0.891607
Sars	0.981913	0.954473
Fam49b	0.981733	0.969621
Nkx2-1	0.981317	0.182616
Rer1	0.981161	0.881058
Junb	0.980944	0.201652
Prrc2b	0.980021	0.85799
Sgta	0.979737	1.04063
Tra2b	0.976544	1.04744
Dazap1	0.975978	1.22014
Kidins220	0.975359	0.768844
Mob4	0.975156	1.04578
Abhd8	0.974894	0.96785
Nxf1	0.974465	1.06129
Snrnp70	0.974248	0.851465
Smap1	0.973975	0.906774
Cacnb3	0.973406	1.39598
Kif5b	0.973376	0.941774
Rad23b	0.973313	1.11509
Tmem147	0.973229	0.938107
Oxct1	0.972017	0.835264
Celf5	0.971872	0.91171
Sncb	0.97101	0.774036
Soga3	0.970542	0.964482
Bmyc	0.969855	0.742653
Polr2i	0.969726	0.890289
Tspan6	0.96964	0.886778
Mrps24	0.969373	0.829499
Wsb2	0.969277	0.730393
2310036O22Rik	0.967865	1.34311
Dnajc7	0.96699	1.11813
Sec11a	0.966572	0.827534
Med28	0.966316	1.09923
Tulp4	0.965588	0.914336
Tnrc6c	0.964828	0.971521
Nap1l4	0.964669	1.09957
Mrps17	0.964001	0.822125
Aurkaip1	0.963609	0.937343
Samd14	0.963393	1.17617
Rtl8a	0.962908	0.211161
Ctnnb1	0.962274	1.33944
Fam69b	0.961376	0.897593
Pbrm1	0.960301	1.04406
Puf60	0.960135	0.993584
Mea1	0.959357	0.984338
Fam57b	0.958504	1.34458
Six3	0.958486	0.0966476
Celf3	0.958432	1.15816
Sv2a	0.957401	0.744805
Psme1	0.956888	0.818694
Palm	0.956819	1.08722
Tm2d2	0.956705	1.04361
Meaf6	0.956263	0.986149
Atp6ap2	0.955888	0.86252
Sdc3	0.955063	0.738981
Tceal8	0.954438	0.941391
Cops6	0.953585	1.10335
Eif4h	0.953188	1.02351
Hnrnpd	0.951833	0.881233
Dcun1d5	0.950711	0.956843
Snu13	0.950267	0.203524
Enah	0.949957	0.988588
Jun	0.948422	0.512418
Txn2	0.947503	1.00629
Rwdd1	0.944633	0.954547
Anp32b	0.942943	0.824326
Psmc2	0.94287	1.02146
Atp1a1	0.942853	0.577193
Arl4a	0.940845	0.570423
Dtd1	0.940321	0.533166
Atp9a	0.93999	0.673824
Ube2e2	0.939764	0.668052
Celf6	0.939465	0.683757
Snrpc	0.938548	0.994412
Taldo1	0.938194	1.07992
Cwc15	0.93787	0.97541
Sf3b1	0.936635	0.980741
Deaf1	0.936204	0.797265
Elof1	0.93595	0.889122
Chchd6	0.935488	0.742956
Cox14	0.935391	0.938711
Sep15	0.935013	1.23153
Rtf1	0.93486	1.03985
Gpx1	0.934329	1.07032
Vti1b	0.93428	0.83041
Bod1	0.934093	0.788819
Cdh2	0.934092	0.965348
Mtch2	0.933889	1.14187
Npc2	0.932755	1.05842
Atp6v1g2	0.93268	0.550555
Sh3bgrl	0.932339	1.06956
Tceb1	0.93163	1.2506
Dtx3	0.931416	1.0993
Ppp1r11	0.930875	0.931556
Snca	0.928675	0.833953
Rap1b	0.928578	1.00116
Thoc7	0.927217	0.978996
Tceal3	0.926483	0.376667
Mrpl41	0.926151	0.807118
Cbln2	0.926117	1.49922
B230219D22Rik	0.9259	0.878802
Psmc4	0.925625	0.982395
Mt3	0.925231	0.524799
1500009L16Rik	0.924311	0.598901
Gpm6b	0.923004	0.959634
Macf1	0.921632	0.71909
Ppm1a	0.921448	0.620128
Stk25	0.920352	0.827089
Gna11	0.91908	0.639699
Maz	0.918155	0.934109
Dnajc8	0.917809	0.942344
Arl1	0.917765	0.851142
Cnpy2	0.917073	0.850326
Klhdc8b	0.915987	0.900877
Ppm1g	0.915403	0.920861
Trim2	0.915224	1.07399
Kif3a	0.914414	0.838059
Sarnp	0.914141	0.870799
Ubald2	0.913682	1.31416
Slc38a2	0.913229	0.73054
Cd47	0.912822	0.749836
Mtx2	0.912765	0.88694
Ppig	0.912546	0.865064
Prkar2a	0.91158	0.876009
Fam216a	0.911159	0.890174
Pak1	0.909956	1.00984
Pcdh19	0.909909	0.248447
Ncald	0.90982	0.552273
Slirp	0.909333	0.899002
Ube2k	0.908764	0.964961
Dgcr6	0.908682	1.03041
Parp6	0.908165	1.24026
Tm2d1	0.907864	0.844927
Rsrc2	0.907697	1.02999
Clstn1	0.907175	0.995441
Trir	0.907062	0.20722
Ift20	0.907045	0.776344
Ppp1cb	0.905335	0.996909
Tonsl	0.904705	1.1847
Wsb1	0.904024	0.991351
Srsf1	0.903957	1.05547
mt-Atp8	0.903923	0.316609
Dpy30	0.903579	0.854969
Ppp1r9a	0.903253	0.366702
Smarca2	0.90313	0.75763
Nudt11	0.901324	0.634899
Aamp	0.901291	0.824236
Cops9	0.900607	0.19757
Ptbp2	0.900406	1.00371
Churc1	0.900289	0.764603
Mrpl14	0.900031	0.711267
Ssr2	0.899606	0.914067
Ostc	0.899572	0.914144
Smim7	0.899445	0.943236
1110065P20Rik	0.898836	0.779972
Cdc37	0.897889	1.08482
Adprh	0.897457	0.995666
Lin7c	0.897224	0.964269
Mrpl42	0.896658	0.837906
Cltc	0.896613	0.716117
Irf2bpl	0.895683	0.913496
Brd3	0.895546	1.07311
Rbmxl1	0.894981	0.950231
Sf3b5	0.894854	0.845866
Adgrl1	0.894455	0.797772
Sar1b	0.894139	0.84043
Trim28	0.893834	1.16102
Sqle	0.893707	1.06765
Mcts1	0.893626	0.889272
Nhp2l1	0.893259	1.16616
Rbbp6	0.891975	0.81176
Mpped2	0.891661	0.666079
Pcdh7	0.891401	0.285723
Nol7	0.890848	0.761434
Epn1	0.8908	0.997575
Phf5a	0.890524	0.955984
Kifap3	0.890382	0.923629
Psmd6	0.889747	1.03814
Psmd13	0.889733	0.913456
Spop	0.889112	0.861546
Onecut2	0.888958	1.76315
Ankra2	0.888715	0.625526
Cask	0.888286	0.751016
L1cam	0.888244	0.69031
Eif3m	0.887761	1.00202
Spag7	0.88741	1.05118
Dcakd	0.887361	1.14013
Atp6v1a	0.887117	0.694516
H2afv	0.887028	1.31547
Chd4	0.886887	1.00413
Sh3glb1	0.886098	0.957805
Cdkn2d	0.885105	0.848216
Pnisr	0.885046	0.980241
Strbp	0.884019	1.01219
Csrp2	0.883439	0.759991
1810022K09Rik	0.883174	0.729625
Ncor1	0.882975	0.994733
Gabrb3	0.882548	0.45008
Nsfl1c	0.881511	0.840524
Actr1a	0.881505	0.959706
Rbbp7	0.881446	0.612772
Eny2	0.881083	0.878973
Hnrnpf	0.880868	1.05091
Lsm6	0.880783	0.921521
Ppa1	0.880736	0.864114
Sin3b	0.879048	0.839503
Usp9x	0.878507	0.64026
Ppp3r1	0.878306	0.79704
Chmp4b	0.878072	0.704971
R3hdm4	0.877985	1.14607
Srp19	0.87754	0.768507
Eif3c	0.877067	0.939215
Scrn1	0.877027	0.616931
Atp2a2	0.876873	0.619561
Anp32a	0.876336	0.87276
Ndufs8	0.876288	0.851322
Hnrnph3	0.875561	1.04377
Enho	0.875151	0.743908
Smarca4	0.874864	1.13456
Tmed10	0.874552	0.836402
Grb2	0.873391	0.885976
Pkig	0.872448	0.876028
Chn1	0.872135	1.05407
Nucks1	0.871689	0.902537
Mrps26	0.871425	0.768395
Id4	0.871285	0.29027
Sod2	0.870366	0.911196
Usp29	0.86912	0.512954
Wdr83os	0.868886	0.762108
Zfos1	0.868789	0.968817
Rp9	0.868661	0.65709
Trappc1	0.868266	1.09485
Ptp4a2	0.867405	0.888921
Pdxp	0.866905	0.292093
Smim10l1	0.866874	0.979129
Ncan	0.865862	0.945861
Commd3	0.865604	0.752366
Map4	0.865421	0.743916
Znrf1	0.86517	0.900664
Anapc13	0.863973	0.888218
Pigp	0.863732	0.832384
Cbr1	0.863479	0.941849
Eid2	0.863275	0.504156
Aimp1	0.863136	0.801864
Nrsn2	0.863031	0.455409
Dpysl5	0.862971	1.03065
Mzt1	0.862601	1.00417
Ppp3cb	0.861944	0.712277
Suclg1	0.861645	0.77024
Psmc6	0.861395	0.92177
Srrm1	0.861057	0.779749
Lamtor5	0.860507	0.975701
Psmd14	0.860089	0.93675
1110008F13Rik	0.859711	1.01045
Atp6ap1	0.859627	0.870099
Vsnl1	0.858568	0.525006
Nrgn	0.858343	0.230549
Prkra	0.85775	0.869105
Lamtor4	0.857221	0.768582
Ubxn4	0.856975	0.859003
Tmem14c	0.856512	0.839797
Slc25a11	0.85644	0.958912
Arl4c	0.856015	0.996647
Napa	0.855717	0.908342
Vat1l	0.855468	0.420051
Tmem167	0.85489	1.01801
Phip	0.85474	1.02703
Ssbp2	0.854584	0.710602
Ube2j2	0.85418	0.908842
Sdhd	0.853428	0.839026
Zfp580	0.853135	0.833705
Supt4a	0.852676	0.898415
Map6	0.852358	0.873311
Lrrc58	0.852144	0.522854
Samd10	0.850218	0.990917
Eif5b	0.849693	0.913748
Atf4	0.849523	0.90286
Pdia6	0.849348	0.869174
Mapre3	0.849298	0.73971
Syngr3	0.848938	0.672673
Mrpl23	0.848741	0.924031
2700094K13Rik	0.84769	1.14908
Adrm1	0.846119	0.863529
Rbm17	0.845231	0.869855
Sap18	0.845225	0.716595
Lsm1	0.844569	0.827207
Actr2	0.844149	0.801449
Grcc10	0.844142	0.846184
Usp34	0.84408	0.664081
Cited1	0.843665	0.123745
Ccdc184	0.843654	0.744509
Rcan2	0.843626	0.808471
Pitpna	0.842632	0.811659
Cyp51	0.842421	0.909833
Tpgs2	0.842245	0.909904
Ccdc124	0.841165	0.95326
Scg3	0.839843	0.981522
Mrpl43	0.839553	0.842518
Polr2g	0.838855	0.760647
Lrrc4b	0.837898	0.488209
Hdgfrp3	0.837703	1.21162
Dync1li1	0.837151	0.891193
Rbm8a	0.837137	0.931873
Mapk3	0.836241	0.747086
Acin1	0.835832	0.858821
Phax	0.835425	0.811362
Wtap	0.835348	0.802373
Nsa2	0.835225	0.813226
Ssna1	0.835125	0.86313
Tomm5	0.835098	0.736212
Bloc1s2	0.834594	0.825595
Actr10	0.834269	0.908072
Ubxn6	0.834202	0.952888
Strn4	0.833901	0.951649
G3bp1	0.83385	0.926486
Fam92a	0.833541	0.618389
Eif6	0.833502	0.845617
Ccdc28b	0.832366	0.823395
Med10	0.831929	0.834909
Tmem30a	0.831517	0.859025
Spin1	0.831333	0.738949
Hba-a1	0.830669	1.36065
Mapk1	0.829999	0.793851
Camk1	0.829594	0.620193
Rps27rt	0.829202	0.756561
Pnn	0.8291	0.751563
Prpf19	0.828347	0.97111
Tmx2	0.82773	0.804523
Chtop	0.82772	1.02309
Micu3	0.827679	0.483119
Eif3g	0.827217	0.896103
Nr4a2	0.826786	1.6024
Gria1	0.826645	0.231135
Aco2	0.826277	0.974969
Got2	0.826188	0.890472
Cnih1	0.825942	1.00117
Gdap1l1	0.825646	0.944223
Dync1h1	0.825615	0.733891
Atraid	0.825611	0.666561
Commd1	0.824834	0.7889
Ciapin1	0.824514	1.03247
Tbpl1	0.824393	0.974596
Spag9	0.824348	0.737884
Impact	0.824185	0.438009
Eif3l	0.824122	0.886581
Slc12a5	0.823527	0.37036
Srpk2	0.822958	0.830076
Dpysl4	0.822649	1.10216
Cend1	0.822401	0.754798
Npepps	0.82222	0.866874
Scn3a	0.82219	0.673263
Gm9843	0.821995	0.799182
Zfp207	0.821871	0.911532
Cope	0.821146	0.963279
Cnot7	0.820703	0.847937
Eif4b	0.820495	0.801246
Gdpd1	0.819798	0.986437
Tmbim6	0.818798	0.798963
Dlg4	0.818488	0.614145
Meis3	0.81828	1.04485
Slc38a1	0.818127	0.769582
Nt5dc2	0.818105	1.27323
Ankrd12	0.817716	0.857472
Eif3d	0.817398	0.869942
Dynlt1a	0.816881	0.686819
Txndc9	0.816476	0.930491
Sdcbp	0.816072	1.11662
1110008P14Rik	0.815687	0.806655
Sptan1	0.815595	0.688777
Csk	0.815246	0.819568
Akirin1	0.815223	0.896958
Map9	0.815099	0.557927
Timp2	0.814676	0.390805
Bud31	0.814625	0.931992
Rangap1	0.814208	0.841281
Golga7	0.814206	1.02683
Mtpn	0.813748	0.737563
Cxadr	0.812902	0.85505
Ntan1	0.812849	0.827884
Snrnp27	0.812223	0.813407
Arl2	0.811703	0.822971
Mrpl57	0.811411	0.735985
Atp13a2	0.811303	0.758479
Wac	0.811209	0.815033
Psmd2	0.809928	0.916748
Gps1	0.809657	0.833313
Mrpl11	0.809292	0.735943
Ddost	0.809073	0.740966
Arpc4	0.809025	0.916186
March6	0.808367	0.588769
H13	0.808277	0.980817
Top2b	0.807981	0.858041
Mtdh	0.807581	0.698826
Gaa	0.80645	0.346627
Mrps18a	0.805545	0.776591
Tmx1	0.80452	0.801301
Maea	0.804007	0.889914
Ecel1	0.803789	0.188558
Cntn1	0.803701	0.445481
Zranb2	0.803536	0.775169
Fam220a	0.803085	0.862929
Nt5c3	0.801716	0.762419
Syn2	0.801702	0.313447
Cxx1b	0.801163	1.07163
Ufc1	0.800744	0.834684
Eif4g1	0.800548	0.658094
Smarcc1	0.800431	0.848446
Chchd10	0.800193	0.405761
Gramd1a	0.800156	0.964959
Psmc1	0.798962	0.837097
Aplp2	0.798864	0.764455
Kctd13	0.798718	0.77247
Timm17b	0.798586	0.834919
Elavl2	0.797746	1.19484
Lamtor1	0.797232	0.794923
Fgf13	0.796074	0.623505
Dut	0.795889	0.73047
Sdf2	0.795764	0.693528
Ctsb	0.795293	0.798631
4833439L19Rik	0.795088	0.986969
Nudt21	0.795043	1.01642
Kif2a	0.794726	0.702483
Coprs	0.794429	0.785625
Armcx2	0.794183	0.883193
Mrpl28	0.793923	0.792652
Pcnp	0.793922	0.806481
Snrpa	0.793879	0.902672
Cops8	0.79331	0.784194
Plekhj1	0.792777	0.782403
Sys1	0.79277	0.772156
Papola	0.79224	0.908309
Psmd11	0.792124	0.852166
Eloc	0.791756	0.190367
Sdhaf4	0.791531	0.686429
Timm17a	0.791302	0.64626
Nudt3	0.790967	0.647826
Csrnp3	0.790877	0.586781
Arf3	0.790695	0.639245
Nptxr	0.790251	0.458299
Kif21a	0.789879	0.906362
Ankrd11	0.789522	0.92038
Nova2	0.789465	0.737047
Acly	0.788845	1.0259
Bclaf1	0.78788	0.729166
Tmem176b	0.787777	0.834108
Gars	0.787571	0.894151
Atp5o.1	0.787303	0.206666
Ddx3x	0.78654	0.785758
Cops5	0.785949	0.883742
Abhd17a	0.785906	0.69437
Rtraf	0.785902	0.188613
Znhit1	0.784538	0.742278
Ap2b1	0.784156	0.777256
Kras	0.784062	0.833407
Rgs4	0.783972	0.203817
Cops4	0.783931	0.816531
Wdr89	0.783798	0.784106
Tmem158	0.783752	0.57564
Ip6k2	0.783568	0.951187
Ahsa1	0.783287	0.75887
Taf10	0.783172	0.645427
Aig1	0.783093	0.612433
Arid1a	0.782707	0.822455
Mocs2	0.782635	0.723628
Zc2hc1a	0.782385	0.821826
Rpp21	0.78158	0.661921
Ndufv1	0.781448	0.793936
Mmd	0.781202	1.10756
Rpl10-ps3	0.780905	0.641834
Dbi	0.780857	0.847373
Btbd1	0.779488	0.880252
Paip1	0.77908	0.778228
Timm9	0.7787	0.505354
Smarcc2	0.77858	0.768293
Nbea	0.778204	0.59807
Chic2	0.777882	0.762372
Fyttd1	0.777717	0.780278
Tra2a	0.777684	0.960234
Haghl	0.777649	0.686615
Cox19	0.777331	0.959479
Rab12	0.776837	0.36353
Tmem132a	0.776743	0.901949
Mrpl51	0.776714	0.783374
Dst	0.776287	0.612229
Tox2	0.77605	0.183499
Snrpb2	0.775709	0.870953
Pabpn1	0.775169	0.716953
Itfg1	0.775131	0.746672
Cib2	0.774651	0.574101
Dpp6	0.774553	0.491745
Trappc3	0.774467	0.814198
Apc	0.774315	0.664381
Mcrs1	0.774028	0.954221
Adgrl3	0.773158	0.465301
Echs1	0.773015	0.770601
Acbd6	0.772527	0.681417
Rab5a	0.772228	0.985106
Igfbpl1	0.772222	1.65972
Tmem246	0.772008	0.598004
Snf8	0.771879	0.889157
Prkar2b	0.771559	0.765642
Vapb	0.770733	0.834571
Scamp1	0.770692	0.836556
Zmynd11	0.770573	0.648617
Dnm1	0.770567	0.478207
Yaf2	0.770494	0.80415
Hnrnpl	0.770457	0.77015
Brd2	0.770042	0.910568
Abi2	0.769991	0.722103
Mrps12	0.769358	0.708613
Hp1bp3	0.76855	0.832425
Emc4	0.768157	0.74025
Map7d1	0.76767	0.898529
Gm11808	0.767472	0.666253
Carhsp1	0.767429	1.23735
Srsf10	0.767237	0.770261
Ddx24	0.766967	0.685933
Tiprl	0.766353	0.730244
Coro1c	0.766336	0.948719
Bin1	0.766312	0.724717
Fam104a	0.765476	0.728913
Nktr	0.765218	0.793608
Lsm5	0.765187	0.703115
Egln2	0.764967	0.837572
Fyn	0.764693	0.730858
Tmed9	0.764588	0.935034
Ncs1	0.764528	0.964883
Akt1	0.764436	0.756056
Lcmt1	0.764062	0.674921
Lrpap1	0.76371	0.612938
Zmat2	0.763448	0.891091
Vps72	0.763164	0.910194
Mgat4b	0.76308	0.483524
Phyhipl	0.762675	0.769291
Nop56	0.762581	0.75768
Taok3	0.762373	0.705425
Vps35	0.761512	0.772336
Jkamp	0.7608	0.835994
Cbx1	0.760435	1.03877
Msmo1	0.76024	0.725907
Tmem208	0.760034	0.712197
Apba2	0.759369	1.01022
H2afj	0.759347	0.842639
Cdv3	0.759093	0.750752
Psmc3	0.758517	0.836792
Gabra5	0.758469	0.113829
Polb	0.758339	0.781931
Myt1l	0.757726	0.462871
Ralyl	0.757433	0.524879
Celf1	0.756423	0.760576
Idh3b	0.756267	0.778138
Jph4	0.756056	0.544803
Polr3k	0.75593	0.926892
Txnl4a	0.755874	0.721907
Tpr	0.755121	0.730612
Gnl3l	0.755081	0.50756
Sult4a1	0.755023	0.461957
Timm10b	0.754906	0.641792
Atad1	0.754434	0.783861
Kdelr1	0.753505	0.851517
Syn1	0.753272	0.731253
Clip3	0.752231	0.828009
Btg1	0.750997	0.926209
Fam195b	0.750855	1.08212
Atp6v0a1	0.750784	0.530696
Sppl3	0.75063	0.664835
Tmem63b	0.750599	0.756495
Cnn3	0.749963	1.33777
Chd3	0.749908	0.879075
Ntng1	0.749889	0.468979
Unc119	0.749138	0.747258
Otub1	0.749065	0.746943
Amn1	0.748566	0.812871
Dctn1	0.748231	0.742613
Pdhb	0.748023	0.667619
D430019H16Rik	0.747941	0.638877
Med30	0.747517	0.664734
Fopnl	0.747454	0.722204
Sez6l2	0.747066	0.608823
Banf1	0.746672	0.804035
Lingo1	0.746488	0.530457
Sra1	0.74626	0.770611
Plppr4	0.746247	0.201188
Dnajc19	0.746224	0.644134
Spint2	0.745869	0.430527
Tln1	0.744253	0.678758
Nipsnap1	0.743823	0.827404
Tomm70a	0.743676	0.632605
Rbm5	0.743408	0.800611
Atp8a1	0.742813	0.368766
Cisd2	0.742732	0.792396
Cbx6	0.742519	0.584535
Nfu1	0.742216	0.78643
Mrpl18	0.742092	0.868646
Zic1	0.741913	1.41099
Cntnap2	0.741809	0.598154
Ctnnd2	0.741657	0.694558
Ptprn	0.741243	0.467656
Pde6d	0.741199	0.69154
Clns1a	0.740505	0.851544
Mrps18c	0.740342	0.694882
Sdhc	0.740154	0.843483
Clpp	0.740115	0.681584
Tomm40	0.739183	0.732233
Dbnl	0.73905	0.825337
Pdrg1	0.738849	0.843628
Camk2d	0.738817	0.341774
Ensa	0.738154	0.588413
Map4k4	0.737589	0.81633
BC005537	0.737507	0.828965
Pgm2l1	0.736895	0.76696
Hspa9	0.736633	0.707759
Zcchc17	0.736385	0.708322
Tro	0.735439	0.346875
Pura	0.735426	0.341054
Bhlhb9	0.735413	0.738758
Etnk1	0.735169	0.503748
Fam136a	0.735132	0.815276
Pnck	0.734995	0.483936
Cadps	0.734946	0.438544
Spock2	0.734307	0.51376
Rgs17	0.734057	0.564141
Mrps16	0.732967	0.571399
Adh5	0.732812	0.875674
Pik3r1	0.732692	0.372337
Ppp2r2d	0.732549	0.683719
Hs6st2	0.732453	0.186594
Pum2	0.732445	0.682219
Tub	0.732442	0.449617
Brd4	0.731737	0.715613
Prr13	0.731496	0.853931
Grik5	0.730911	0.638013
Nrxn3	0.73073	0.610666
B3gat3	0.730653	0.545684
Tfg	0.730607	0.717553
Ntrk2	0.730321	0.279746
Sqstm1	0.730298	0.623154
Bag6	0.730093	0.850311
Ap2a2	0.73003	0.74725
Hdac3	0.729911	0.724163
Rab3c	0.729661	0.969401
Magoh	0.729457	0.697175
Imp3	0.729297	0.529461
Fem1b	0.729008	0.619415
Scp2	0.729001	0.830994
Rnf208	0.728787	0.684577
Shank1	0.728363	0.80434
Syt5	0.72729	0.484785
Glyr1	0.726811	0.826803
Ddx17	0.726558	0.726599
Ppp4c	0.726342	0.909177
Kansl2	0.726075	0.769658
Prrc2a	0.726035	0.637074
Prr7	0.725415	0.595749
Grpel1	0.725236	0.665039
Klf6	0.725141	0.466815
Tspan17	0.724846	0.431149
Copg1	0.724446	0.660572
Med21	0.724258	0.606913
Armc1	0.723918	0.700488
Ergic2	0.723816	0.768847
Use1	0.723599	0.74818
Dzip3	0.723273	0.482241
Gstp1	0.722467	0.380178
Akr1b3	0.721916	0.605529
Cab39	0.721776	0.696659
March5	0.721584	0.90212
Mrps6	0.721509	0.54486
Tspyl1	0.721482	0.776182
Tmem183a	0.721418	0.790719
Inpp4a	0.721385	0.567193
Trp53bp1	0.721362	0.566047
Cacng4	0.721241	0.803846
Eef1d	0.721197	0.577805
Ptprd	0.720963	0.569068
Emc7	0.720923	0.513916
Pmm1	0.720876	0.568224
Dcaf7	0.720536	0.560593
Hprt	0.719451	0.460221
Cuta	0.719185	0.739741
Dnmt3a	0.719168	0.552468
Rnf165	0.719144	1.12136
Cacfd1	0.718987	0.826541
Limd2	0.71887	0.962737
Mrpl27	0.718712	0.637963
Nudt10	0.718703	0.542538
Tnik	0.718492	0.637522
Ncbp2	0.717277	0.708654
Gkap1	0.717254	0.397169
Gemin7	0.717188	0.697741
Bptf	0.717044	0.702302
Clcn3	0.716738	0.586817
Mrps15	0.716234	0.688685
Flywch2	0.716114	0.6085
Tmem126a	0.715777	0.616592
Magee1	0.715729	0.650905
Rbbp4	0.715665	0.816844
Ubap2l	0.715475	0.654086
Cfap36	0.715336	0.615243
Uba2	0.714861	0.817266
Fnta	0.714754	0.797589
Bub3	0.714581	0.802648
Pclo	0.714118	0.35659
2410002F23Rik	0.714067	0.733392
Apex1	0.713905	0.796962
Cyfip2	0.713845	0.671583
Mrps14	0.71376	0.693573
Pld3	0.713516	0.601574
Eif4g3	0.713178	0.696479
Blmh	0.712924	0.834894
Ccni	0.712667	0.885143
Aff4	0.71231	0.578916
Rtcb	0.712173	0.76671
Mrps36	0.71216	0.734716
Zfand6	0.71204	0.933119
Alyref	0.711559	0.506149
Rnd3	0.711242	0.757062
Rsl1d1	0.711051	0.702117
Idi1	0.710134	0.751077
Dctn6	0.709515	0.637469
Ei24	0.709428	0.791472
Txndc15	0.709329	0.794141
Lasp1	0.709309	0.613886
Selenom	0.708956	0.46153
Gnb4	0.708595	0.402375
Cdk16	0.707735	0.782648
Huwe1	0.706446	0.664521
Kif5a	0.706395	0.655428
Trim32	0.705782	0.716466
Vstm2l	0.705531	0.482059
Csnk2a1	0.70527	0.75673
Gsto1	0.704548	0.610772
Apoe	0.70396	0.180383
Dctpp1	0.703244	0.687687
Gtf2i	0.703105	0.65786
Mpnd	0.702589	1.0255
Sdha	0.70251	0.696788
Rbm18	0.702188	0.827693
Prr3	0.70189	0.50418
Plppr2	0.701819	0.634279
Sobp	0.701357	0.597544
Cep170	0.701198	0.695666
Usp14	0.700919	0.649822
Psmd12	0.700849	0.715833
Tram1l1	0.700653	0.786353
Mtfr1l	0.700561	0.694481
Senp6	0.700497	0.626329
Chmp1a	0.699979	0.779986
Wrb	0.699114	0.602939
Abr	0.698829	0.589436
Msi2	0.698757	1.06901
Mydgf	0.698408	0.604063
Psme2	0.698089	0.748949
Pdcd10	0.698025	0.555076
Fsd1	0.697876	0.637771
Dpm2	0.697558	0.65219
Pnmal1	0.697493	0.344349
Lsm3	0.697076	0.702215
Map7d2	0.696507	0.69645
Stk16	0.696364	0.651533
Comt	0.696057	0.644518
Cacna2d1	0.695899	0.655305
Pa2g4	0.695885	0.641554
Idh3g	0.69567	0.778815
Ogt	0.695643	0.823762
Pqbp1	0.694363	0.678324
Tmem29	0.694226	0.574407
Hnrnpm	0.694108	0.828643
Vps28	0.693807	0.145897
Ppid	0.692835	0.637281
Cdc26	0.692763	0.763366
Fbl	0.692763	0.686742
Rps19bp1	0.69275	0.702353
Pde10a	0.6924	0.227065
Rtl8b	0.692334	0.130303
Drg1	0.69225	0.811185
Srp72	0.691735	0.757346
Bpgm	0.691427	0.790616
Dnajc15	0.691414	0.528655
H1f0	0.691358	1.11068
Cops3	0.691314	0.785566
2210013O21Rik	0.691058	0.823132
4930402H24Rik	0.690259	0.705543
Car10	0.690221	0.382236
Rab24	0.690006	0.679017
Magi1	0.689736	0.362981
Traf4	0.689612	1.07638
Rbm42	0.688704	0.745919
Glrx2	0.688579	0.648497
Dusp8	0.688472	0.681672
Selenoh	0.688388	0.175677
Ubn2	0.688371	0.71074
Ttll1	0.687959	0.770282
Smc3	0.687561	0.855296
Agap3	0.687459	0.493842
Vgf	0.687116	0.164862
Tmco1	0.686989	0.615045
Raph1	0.686686	0.518498
Pcm1	0.686066	0.568719
Mrpl48	0.68587	0.648913
Slc30a9	0.684693	0.701192
Ccdc12	0.684553	0.69701
Manbal	0.684291	0.569092
1810058I24Rik	0.684123	0.948874
Ssr3	0.684066	0.748847
Phb	0.682815	0.567926
Cs	0.682351	0.775003
Cfap20	0.682273	0.585612
Psmd1	0.682147	0.753041
Ssr1	0.681403	0.654154
Agpat4	0.68134	0.572101
Gpbp1	0.680758	0.71164
Snx6	0.680454	0.746737
Hist3h2a	0.68033	1.26813
Grin2b	0.680269	0.226851
Gm2694	0.680179	0.949968
Gm8730	0.680157	0.642442
Wbp4	0.680023	0.633711
Ralgds	0.679967	0.793841
Tle4	0.679881	0.43537
Chga	0.679691	0.805098
Cby1	0.679466	0.553718
Msl1	0.679081	0.660212
Tdg	0.678927	0.950657
Ola1	0.678113	0.649074
Rnf126	0.677996	0.608407
Elp5	0.677818	0.705811
Itpa	0.677562	0.821542
Pin4	0.677553	0.721866
Klhl7	0.677519	0.557019
Ktn1	0.677198	0.598259
Gatad1	0.676696	0.648305
Pdcl3	0.675091	0.700873
Midn	0.675	0.936453
Iscu	0.674735	0.602236
Cldnd1	0.674174	0.729953
Nckap1	0.673642	0.540916
Ybx3	0.671933	0.440451
Napb	0.671684	0.607509
Ivns1abp	0.671671	0.892794
Copz1	0.671545	0.815291
Cpsf6	0.671481	0.717707
Tmem57	0.671157	0.842492
Ap4s1	0.67077	0.565212
Chchd4	0.670687	0.513323
Wbp11	0.67041	0.645574
Pou4f1	0.670288	1.62468
Lrrn3	0.670132	0.526888
Gnai1	0.669975	0.517219
Cyb5r3	0.669729	0.867229
Sod1	0.669479	0.563805
Smc6	0.669146	0.573596
Sugt1	0.668715	0.676462
Tmem163	0.668692	0.987338
Sh3bp5	0.668663	0.71828
Rpl23a-ps3	0.668531	0.743283
Rpn2	0.668453	0.779113
Polr2c	0.668144	0.702638
Ago2	0.667644	0.387657
Rdx	0.667592	0.778794
Tbrg1	0.667006	0.535858
Prkce	0.666756	0.305854
Ptpn5	0.665244	0.689189
Cdk5	0.664967	0.679586
Ctnna2	0.664858	0.520366
Ddb1	0.664822	0.782084
Cpne4	0.664727	0.395888
Prdx6	0.66434	0.894917
Ost4	0.664232	0.881545
Hpcal1	0.663517	0.830705
Nudcd3	0.663382	0.644144
Ctsd	0.66335	0.691721
Sh3gl3	0.663255	0.429615
Eif1a	0.663143	0.585421
Ankrd17	0.663076	0.543589
Gipc1	0.662762	0.785839
Trim44	0.662357	0.538802
Cux1	0.662259	0.570906
Nsf	0.662124	0.477072
Rex1bd	0.662105	0.145776
Ilkap	0.661705	0.686713
Snap91	0.661193	0.615675
Pdcd6	0.661135	0.631072
Peli1	0.660846	0.800898
Atp6v1h	0.660429	0.707639
Pum1	0.660275	0.632995
Sept11	0.660039	0.538789
Mgea5	0.659296	0.65212
Rtn2	0.658942	0.650332
Rab5c	0.658523	0.830587
Apc2	0.658312	0.737058
Gpr85	0.658284	0.715609
Sar1a	0.657537	0.678015
Trp53i11	0.657452	1.43931
Tmed7	0.657379	0.683112
Ndrg3	0.656974	0.514315
Ccdc50	0.656413	0.610396
Tmem179	0.656275	0.441466
Tmem222	0.655793	0.56986
Tmem35	0.655259	0.891224
Herc1	0.654889	0.586942
Fbxw2	0.654674	0.484698
Tsc22d3	0.654495	0.899977
Ppp2r2a	0.654478	0.674194
Brinp1	0.654377	0.464524
Mapk10	0.653617	0.632638
Rrad	0.65308	0.0355581
2410004B18Rik	0.653001	0.562761
Upf3b	0.652125	0.633253
Tnrc6a	0.651983	0.550521
Mthfd2l	0.651773	0.79069
Cox20	0.651652	0.78607
Atf2	0.651488	0.745808
Csnk1d	0.651464	0.681739
Epm2aip1	0.651371	0.392322
Phf14	0.651282	0.622257
Ap1m1	0.651094	0.783257
Atl1	0.651093	0.658368
Spg21	0.650981	0.856666
Fundc2	0.650937	0.657769
Impad1	0.650424	0.43404
Cystm1	0.650058	0.583959
Stau2	0.6493	0.617312
Sae1	0.649256	0.765154
Ptpro	0.649238	0.314924
Flywch1	0.649232	0.636404
Commd4	0.648397	0.638109
Slbp	0.648357	0.658978
Psmd3	0.647994	0.639206
Daam1	0.64771	0.43238
Sec23a	0.647556	0.784724
Atp6v1c1	0.647504	0.649256
Fzr1	0.647082	0.70965
Vstm2b	0.64692	0.704561
B230209E15Rik	0.64687	0.13138
Nicn1	0.646801	0.666671
Cd63	0.646646	0.69785
Tmem128	0.646516	0.715563
Atcay	0.646061	0.623212
Chst2	0.645923	0.916801
Gm9493	0.645018	0.572157
Ppp2r5b	0.644964	0.667335
Clasp2	0.64419	0.420465
Arf2	0.643938	0.670131
Dnajc2	0.643372	0.692586
Sbno1	0.642946	0.753494
Nell2	0.642759	0.712923
Nexmif	0.642256	0.0733868
U2surp	0.641944	0.679297
Ppp2r2c	0.641869	0.354671
Scn9a	0.641667	0.400774
Map2k1	0.64087	0.393453
Anapc16	0.640739	0.753234
Gm47283	0.640662	0.202033
Gdap1	0.640506	0.451924
Poldip2	0.639438	0.762621
Vps4a	0.639245	0.682951
Jtb	0.638561	0.50253
Timm10	0.638055	0.410993
Smim18	0.637982	0.565805
Cadm3	0.637951	0.623187
[truncated: 19,083 more rows]
