# Supplementary material for: Developmental single-cell transcriptomics of hypothalamic POMC neurons reveal the genetic trajectories of multiple neuropeptidergic phenotypes
Source: eLife. 2022 Jan 19;11:e72883. doi: 10.7554/eLife.72883 (PMC8806186; doi:10.7554/eLife.72883)
Supplement: Figure 2—source data 3. — Pomc(med)/Nr4a2 and the two subclusters 2–1 and 2–2 derived from reclustering of cluster 2. Pomc(med)/Ebf1 Ebf1 (corresponding to Figure 2G, cluster 2 and Figure 2—figure supplement 1, cluster 3). [file elife-72883-fig2-data3.xlsx]

## Sheet: Cluster 3
Figure 2 - Source Data 3 (corresponding to Figure2-figure supplement 1). Feature genes that define each of the 2 subclusters
3-1 and 3-2 derived from reclustering of Cluster 3. Pomc(med)/Nr4a2.
The data are sorted from highest to lowest for each subcuster by average log fold-change > 0.25
(avg_logFC) of gene expression in the featured subcluster relative to the other subclusters
pct.1, Percentage of cells in the indicated subcluster with significant differential gene expression
pct.2, Percentage of cells in the other subcluster with significant differential gene expression
p-val, p-value
p_val_adj, adjusted p-value for multiple comparisons
The Wilcoxon test was performed to identify the differentially expressed genes in each subcluster
Gene	p_val	avg_logFC	pct.1	pct.2	p_val_adj	cluster
Tmsb10	1.05121e-57	2.3228	1	0.947	3.41149e-53	3-1
Tubb2b	1.03501e-55	2.26938	0.997	0.814	3.35893e-51	3-1
Sepw1	2.05235e-19	2.2073	0.483	0	6.6605e-15	3-1
Hn1	2.05235e-19	2.16812	0.483	0	6.66049e-15	3-1
Cd24a	2.30957e-38	2.12904	0.858	0.088	7.49525e-34	3-1
Rpl13a	3.3352e-41	2.08814	0.885	0.088	1.08237e-36	3-1
Tuba1a	4.08378e-50	1.9932	1	0.991	1.32531e-45	3-1
Stmn1	1.56954e-55	1.87488	1	0.876	5.09362e-51	3-1
H3f3a	3.43086e-54	1.81454	0.997	0.611	1.11342e-49	3-1
Tubb5	2.70184e-54	1.7922	1	0.841	8.76829e-50	3-1
Snca	1.61999e-40	1.76718	0.916	0.345	5.25735e-36	3-1
Ftl1	1.78012e-47	1.76124	1	0.717	5.77701e-43	3-1
C1ql1	9.87605e-16	1.73465	0.461	0.035	3.20508e-11	3-1
Tceb2	3.78265e-19	1.72974	0.478	0	1.22758e-14	3-1
Nr4a2	2.6451e-51	1.69779	0.985	0.142	8.58414e-47	3-1
Ngfrap1	3.78265e-19	1.67239	0.478	0	1.22758e-14	3-1
Tubb3	2.17973e-53	1.6517	1	0.788	7.07388e-49	3-1
Ptma	1.83896e-50	1.58305	0.997	0.85	5.96797e-46	3-1
Rpl23a	2.97669e-47	1.53541	0.987	0.23	9.66025e-43	3-1
Ybx1	1.7931e-53	1.53499	0.992	0.637	5.81914e-49	3-1
Nnat	8.65342e-45	1.51945	1	0.929	2.8083e-40	3-1
Rps19	1.24388e-53	1.51789	1	0.549	4.03677e-49	3-1
Eef1a1	2.35827e-53	1.47911	1	0.894	7.65329e-49	3-1
Marcksl1	1.30388e-52	1.44913	0.995	0.726	4.23149e-48	3-1
Rpl17	4.59656e-48	1.44198	0.995	0.487	1.49172e-43	3-1
Rps8	4.72494e-53	1.42963	0.997	0.619	1.53338e-48	3-1
Rplp0	3.66835e-53	1.42533	0.995	0.628	1.19049e-48	3-1
Actg1	4.05806e-55	1.42411	1	0.956	1.31696e-50	3-1
Rpl10	2.50811e-41	1.41304	1	0.522	8.13958e-37	3-1
Hmgb3	4.8334e-53	1.40463	0.992	0.292	1.56858e-48	3-1
Rps5	1.89758e-53	1.40082	0.997	0.611	6.15823e-49	3-1
Rpl39	4.37546e-52	1.39205	0.997	0.575	1.41997e-47	3-1
Mllt11	3.40143e-55	1.38387	0.995	0.673	1.10387e-50	3-1
Rpl14	6.47289e-49	1.38097	1	0.469	2.10065e-44	3-1
Erh	2.64001e-47	1.37463	0.995	0.248	8.56763e-43	3-1
Gap43	5.1734e-52	1.3737	0.997	0.858	1.67892e-47	3-1
Ina	2.53444e-39	1.36857	0.98	0.372	8.22502e-35	3-1
Lmo4	4.93724e-32	1.36603	0.789	0.106	1.60228e-27	3-1
Rpl41	3.939e-55	1.36216	0.997	0.912	1.27833e-50	3-1
Rps26	2.19645e-50	1.36028	0.997	0.451	7.12815e-46	3-1
Rplp2	2.09036e-52	1.34722	1	0.549	6.78385e-48	3-1
Sox4	4.84843e-30	1.34435	0.944	0.327	1.57346e-25	3-1
Rpl35	3.32283e-50	1.34209	0.992	0.487	1.07836e-45	3-1
Rps6	1.5888e-45	1.33481	0.997	0.504	5.15613e-41	3-1
Rpl31	2.5341e-44	1.33282	0.995	0.46	8.22392e-40	3-1
Rps7	2.44778e-52	1.33246	0.997	0.646	7.94377e-48	3-1
Serf1	4.49126e-49	1.32633	0.982	0.204	1.45755e-44	3-1
Hist3h2ba	2.67235e-41	1.32484	0.977	0.195	8.67258e-37	3-1
Cfl1	3.35966e-52	1.31737	0.992	0.726	1.09031e-47	3-1
Rps23	3.08324e-47	1.31727	0.995	0.531	1.0006e-42	3-1
Gnb2l1	2.05235e-19	1.30924	0.483	0	6.6605e-15	3-1
Cnih2	5.86474e-51	1.30676	0.99	0.496	1.90328e-46	3-1
Rpl38	1.56941e-51	1.30505	0.997	0.637	5.09321e-47	3-1
Rpl29	2.44714e-51	1.30296	0.995	0.531	7.9417e-47	3-1
Usmg5	3.10383e-49	1.28921	0.992	0.381	1.00729e-44	3-1
Cox7b	7.52704e-48	1.27961	0.982	0.301	2.44275e-43	3-1
Pfn2	3.46756e-52	1.27561	1	0.602	1.12533e-47	3-1
Selk	5.1264e-19	1.27294	0.476	0	1.66367e-14	3-1
Atp5o	3.10056e-18	1.27269	0.461	0	1.00622e-13	3-1
Rps16	2.07208e-48	1.27068	0.997	0.513	6.72451e-44	3-1
Rpl7	8.64777e-46	1.2474	0.997	0.531	2.80646e-41	3-1
Rps18	1.5614e-46	1.24475	1	0.566	5.06722e-42	3-1
H3f3b	1.72404e-48	1.23472	1	0.814	5.59502e-44	3-1
Zfp428	2.8919e-46	1.23435	0.964	0.212	9.38507e-42	3-1
Sumo2	8.46791e-54	1.22594	0.995	0.699	2.74809e-49	3-1
Rpl21	5.19e-50	1.22058	1	0.646	1.68431e-45	3-1
Tmsb4x	2.44334e-50	1.22002	1	0.973	7.92937e-46	3-1
Cox6b1	5.31643e-52	1.21807	0.99	0.566	1.72534e-47	3-1
Rps14	5.63486e-36	1.21589	0.995	0.575	1.82868e-31	3-1
Rpl4	1.03869e-42	1.2085	0.997	0.496	3.37085e-38	3-1
Rps17	4.60683e-40	1.20644	0.995	0.451	1.49505e-35	3-1
Eif3f	1.83403e-47	1.20398	0.98	0.23	5.95199e-43	3-1
Dpysl3	4.34816e-43	1.20369	0.99	0.407	1.41111e-38	3-1
Mif	1.2383e-46	1.20269	0.995	0.46	4.01866e-42	3-1
Rps25	1.56225e-46	1.19956	0.995	0.451	5.06996e-42	3-1
Rpl32	5.82641e-46	1.19794	0.997	0.646	1.89084e-41	3-1
Cox6c	1.29728e-48	1.19296	0.992	0.549	4.21005e-44	3-1
Ppia	5.28454e-48	1.19099	0.997	0.92	1.71499e-43	3-1
Rpsa	2.82504e-50	1.18912	0.997	0.788	9.1681e-46	3-1
Rps15a	7.71201e-46	1.18336	0.995	0.611	2.50278e-41	3-1
Atp5e	5.49236e-47	1.18322	0.987	0.593	1.78243e-42	3-1
Sec61g	1.7208e-48	1.17807	0.995	0.381	5.58451e-44	3-1
Hmgb1	7.2243e-45	1.1738	0.995	0.522	2.3445e-40	3-1
Rpl37a	3.1675e-51	1.17007	0.997	0.779	1.02795e-46	3-1
Ddah2	4.25247e-47	1.16536	0.936	0.124	1.38006e-42	3-1
Rpl27	2.41768e-42	1.16101	0.982	0.301	7.84608e-38	3-1
Rps29	4.64997e-49	1.15269	1	0.796	1.50905e-44	3-1
Rpl36a	1.86492e-45	1.14733	0.982	0.425	6.05224e-41	3-1
Rpl37	1.00373e-51	1.13902	0.997	0.823	3.25741e-47	3-1
Snrpn	2.54578e-45	1.13847	1	0.699	8.26181e-41	3-1
Rpl18a	5.40255e-44	1.13831	1	0.628	1.75329e-39	3-1
Cycs	3.14686e-42	1.13431	0.972	0.301	1.02125e-37	3-1
Rpl11	1.3926e-49	1.12975	0.997	0.717	4.5194e-45	3-1
Ptms	8.73113e-51	1.12738	0.997	0.717	2.83351e-46	3-1
Mt3	1.2795e-19	1.12633	0.814	0.425	4.15238e-15	3-1
Atp5j	2.77059e-46	1.11375	0.982	0.46	8.9914e-42	3-1
Rpl6	3.3155e-48	1.11028	0.995	0.77	1.07598e-43	3-1
Rpl3	7.05052e-50	1.10371	0.997	0.752	2.28811e-45	3-1
Eef1g	3.76348e-34	1.10136	0.992	0.46	1.22136e-29	3-1
Rps2	7.37263e-49	1.10104	0.992	0.805	2.39264e-44	3-1
Rpl26	1.20788e-45	1.09515	0.997	0.735	3.91993e-41	3-1
Ttc9b	5.12096e-36	1.09313	0.941	0.283	1.66191e-31	3-1
Rps28	1.16997e-45	1.08994	0.99	0.628	3.79691e-41	3-1
Rnf187	1.4902e-49	1.08744	0.99	0.513	4.83614e-45	3-1
Rps9	1.00419e-42	1.08736	0.995	0.655	3.25889e-38	3-1
Cox5a	7.87313e-38	1.08542	0.987	0.522	2.55507e-33	3-1
Pafah1b3	1.92847e-38	1.08304	0.987	0.319	6.25845e-34	3-1
Dynlrb1	3.33362e-46	1.07946	0.985	0.398	1.08186e-41	3-1
Rps15	1.49542e-30	1.07791	0.995	0.54	4.85308e-26	3-1
Rps27	2.59417e-43	1.07602	0.995	0.708	8.41887e-39	3-1
Actb	8.70304e-34	1.07436	1	0.956	2.8244e-29	3-1
Rps27a	4.84073e-47	1.07369	0.995	0.805	1.57096e-42	3-1
Selenow	0.00423089	1.07194	0.514	0.69	1	3-1
Ywhae	4.66793e-47	1.06747	0.997	0.708	1.51488e-42	3-1
Rpl34	7.19784e-45	1.06442	0.99	0.655	2.33592e-40	3-1
Naca	1.56813e-43	1.06269	0.992	0.513	5.08906e-39	3-1
Hint1	6.34561e-45	1.06266	0.992	0.664	2.05934e-40	3-1
Wbp5	3.10056e-18	1.06198	0.461	0	1.00622e-13	3-1
Rpl24	7.94382e-44	1.05955	0.997	0.602	2.57801e-39	3-1
Rpl28	3.96593e-44	1.05692	0.997	0.566	1.28706e-39	3-1
Cox7a2	4.16297e-44	1.05446	0.997	0.54	1.35101e-39	3-1
Tmeff1	1.2169e-44	1.0533	0.987	0.239	3.94919e-40	3-1
Rps3a1	3.3499e-47	1.05314	0.995	0.69	1.08714e-42	3-1
Cox5b	2.94558e-40	1.05193	0.982	0.487	9.55928e-36	3-1
Hnrnpa1	1.31333e-36	1.05024	0.992	0.522	4.26215e-32	3-1
Rpl7a	4.15865e-42	1.04729	0.99	0.487	1.34961e-37	3-1
Myeov2	3.10057e-18	1.04441	0.461	0	1.00623e-13	3-1
Bcl11a	4.81239e-34	1.0438	0.842	0.088	1.56176e-29	3-1
Gm2694	8.79854e-29	1.04035	0.679	0.035	2.85539e-24	3-1
Rps12	1.69459e-39	1.03824	0.985	0.416	5.49944e-35	3-1
Tpt1	7.00465e-47	1.03246	0.995	0.805	2.27322e-42	3-1
2010107E04Rik	5.82908e-41	1.02964	0.972	0.381	1.89171e-36	3-1
Fgf13	2.88603e-31	1.02943	0.855	0.195	9.36603e-27	3-1
Fabp5	6.73504e-39	1.02539	0.995	0.637	2.18572e-34	3-1
Snrpg	1.02431e-42	1.02453	0.967	0.15	3.3242e-38	3-1
Shfm1	9.38298e-19	1.02303	0.471	0	3.04506e-14	3-1
Rps3	2.62927e-46	1.02167	0.997	0.735	8.53278e-42	3-1
Cox7c	7.92442e-43	1.02087	0.992	0.611	2.57171e-38	3-1
Rps11	8.82189e-43	1.01876	0.992	0.655	2.86297e-38	3-1
Rpl13	2.78469e-47	1.0176	1	0.858	9.03716e-43	3-1
Ywhaq	1.06627e-45	1.01275	0.997	0.699	3.46035e-41	3-1
Rpl36	3.73477e-46	1.01243	0.995	0.708	1.21204e-41	3-1
Cxx1a	2.3036e-18	1.01102	0.463	0	7.47586e-14	3-1
Prdx2	4.05836e-36	1.00956	0.997	0.637	1.31706e-31	3-1
Mapt	1.97683e-45	1.00802	0.992	0.77	6.4154e-41	3-1
Camk2n1	1.27652e-32	1.00716	0.957	0.398	4.14269e-28	3-1
Fau	4.66422e-46	1.00649	1	0.761	1.51368e-41	3-1
Atp5g3	3.4619e-39	1.00341	0.985	0.549	1.12349e-34	3-1
Atpif1	1.28072e-46	1.00144	1	0.726	4.15633e-42	3-1
Sox11	4.41459e-19	1.00045	0.962	0.425	1.43267e-14	3-1
Rps4x	6.32057e-45	0.996547	0.997	0.743	2.05121e-40	3-1
Olfm1	4.10592e-26	0.992708	0.893	0.345	1.33249e-21	3-1
Chd3os	3.7772e-38	0.991856	0.964	0.345	1.22582e-33	3-1
Pitx2	2.7328e-14	0.991403	0.481	0.08	8.86877e-10	3-1
Eef2	6.81174e-34	0.990696	0.997	0.788	2.21062e-29	3-1
Pebp1	1.4615e-44	0.990137	0.997	0.646	4.74301e-40	3-1
Rpl8	1.99507e-45	0.989167	0.995	0.717	6.4746e-41	3-1
Ebf2	6.74058e-34	0.988827	0.761	0.035	2.18752e-29	3-1
Crmp1	4.13743e-40	0.986221	0.992	0.487	1.34272e-35	3-1
Atp5k	2.97501e-42	0.98611	0.985	0.46	9.6548e-38	3-1
Snrpe	7.83068e-41	0.985053	0.98	0.257	2.54129e-36	3-1
Hbb-y	6.35052e-10	0.9808	0.272	0	2.06093e-05	3-1
Cbln2	2.45601e-17	0.977989	0.603	0.124	7.97047e-13	3-1
Sbk1	2.11514e-36	0.977937	0.944	0.186	6.86425e-32	3-1
Basp1	3.81523e-37	0.977582	1	0.929	1.23816e-32	3-1
Gabarap	3.72521e-43	0.974607	0.99	0.487	1.20894e-38	3-1
Tma7	2.31021e-43	0.974401	0.99	0.496	7.49733e-39	3-1
Sep15	2.3036e-18	0.97217	0.463	0	7.47586e-14	3-1
Rps24	6.29469e-45	0.971191	0.997	0.805	2.04282e-40	3-1
Eid1	1.55515e-35	0.97043	0.977	0.504	5.04693e-31	3-1
Calm2	3.35388e-39	0.970039	1	0.894	1.08843e-34	3-1
Fis1	4.48054e-41	0.969229	0.98	0.292	1.45407e-36	3-1
Atp5l	1.00744e-41	0.969184	0.987	0.566	3.26945e-37	3-1
Nme1	4.73901e-39	0.96606	0.995	0.575	1.53795e-34	3-1
Rps13	9.20869e-43	0.963093	0.997	0.717	2.9885e-38	3-1
Uqcrh	1.58596e-41	0.958686	0.982	0.478	5.1469e-37	3-1
Atxn7l3b	1.99389e-41	0.957114	0.992	0.513	6.47078e-37	3-1
Rplp1	5.53023e-41	0.956127	0.992	0.717	1.79472e-36	3-1
Ppdpf	2.32431e-40	0.955752	0.962	0.204	7.54307e-36	3-1
Atp5j2	1.4865e-40	0.955235	0.995	0.584	4.82414e-36	3-1
Svbp	1.68396e-42	0.953839	0.959	0.142	5.46497e-38	3-1
Sncb	3.08849e-13	0.948331	0.774	0.469	1.00231e-08	3-1
Cmpk1	1.71666e-39	0.946917	0.98	0.363	5.57109e-35	3-1
Rps21	2.18533e-37	0.946529	0.987	0.54	7.09205e-33	3-1
Pfdn5	2.72596e-43	0.945796	0.99	0.522	8.84655e-39	3-1
Sf3b6	7.73641e-41	0.945745	0.957	0.177	2.5107e-36	3-1
Chchd2	6.97279e-40	0.942845	1	0.743	2.26288e-35	3-1
Atp6v1g1	8.68668e-38	0.942195	0.985	0.398	2.81909e-33	3-1
Tbca	2.1702e-39	0.94071	0.987	0.425	7.04296e-35	3-1
Fth1	4.11969e-37	0.93688	0.992	0.788	1.33696e-32	3-1
Dpysl2	1.68291e-37	0.933544	1	0.735	5.46155e-33	3-1
Eif4g2	1.18124e-38	0.931497	0.997	0.646	3.83348e-34	3-1
Hdgfrp3	1.26724e-18	0.931008	0.468	0	4.11256e-14	3-1
Atp5h	1.04248e-40	0.929998	0.997	0.487	3.38317e-36	3-1
Hmgn1	7.05047e-30	0.928656	0.995	0.442	2.28809e-25	3-1
Evl	2.71422e-40	0.926702	0.987	0.513	8.80846e-36	3-1
2700060E02Rik	1.70954e-18	0.921361	0.466	0	5.54796e-14	3-1
Pdap1	1.63628e-39	0.918116	0.972	0.221	5.31022e-35	3-1
Ndufs5	3.78253e-35	0.917731	0.977	0.389	1.22754e-30	3-1
Atp5c1	1.04938e-34	0.916563	0.977	0.416	3.40555e-30	3-1
Necab2	6.99905e-26	0.915708	0.791	0.212	2.2714e-21	3-1
Map1lc3a	4.62089e-38	0.912682	0.992	0.637	1.49962e-33	3-1
Dynll1	1.86103e-38	0.910717	0.985	0.708	6.0396e-34	3-1
Lmx1a	8.80229e-44	0.909033	0.888	0.035	2.85661e-39	3-1
Rpl19	8.64494e-43	0.904271	1	0.796	2.80554e-38	3-1
Cox4i1	9.66374e-37	0.903829	0.995	0.69	3.13617e-32	3-1
Snrpd2	2.45138e-38	0.903458	0.967	0.372	7.95545e-34	3-1
Slc25a4	5.04685e-38	0.903029	1	0.752	1.63786e-33	3-1
Cox7a2l	2.27688e-35	0.902454	0.977	0.292	7.38917e-31	3-1
Uqcr11	1.00149e-36	0.899898	0.977	0.478	3.25014e-32	3-1
Atp5g1	1.06826e-30	0.899503	0.985	0.637	3.46683e-26	3-1
Cirbp	8.33974e-40	0.899466	0.997	0.593	2.7065e-35	3-1
Eif1	2.37324e-45	0.897785	1	0.876	7.70187e-41	3-1
Atp5f1	1.49403e-35	0.896294	0.985	0.496	4.84858e-31	3-1
2310036O22Rik	4.16855e-18	0.893983	0.458	0	1.35282e-13	3-1
Mien1	2.25903e-31	0.893323	0.926	0.283	7.33123e-27	3-1
Ube2d1	6.53916e-41	0.891675	0.952	0.15	2.12215e-36	3-1
Gng3	2.056e-32	0.890279	0.995	0.735	6.67234e-28	3-1
Rps10	1.65329e-41	0.889946	0.997	0.69	5.36543e-37	3-1
Rpl23	1.19522e-43	0.888266	0.995	0.85	3.87885e-39	3-1
Hsbp1	5.41594e-37	0.88647	1	0.593	1.75763e-32	3-1
Pkia	4.32791e-35	0.886117	0.957	0.292	1.40454e-30	3-1
Rab11b	1.87139e-34	0.885342	0.977	0.283	6.07324e-30	3-1
Prdx5	9.08079e-33	0.884023	0.962	0.327	2.94699e-28	3-1
Romo1	1.44755e-34	0.883013	0.957	0.292	4.69774e-30	3-1
Aes	3.1889e-28	0.882374	0.944	0.487	1.03489e-23	3-1
Ndufv3	2.0836e-34	0.881693	0.949	0.345	6.76191e-30	3-1
Dstn	6.64252e-37	0.881166	0.98	0.389	2.1557e-32	3-1
Rpl27a	1.68623e-41	0.879706	0.995	0.735	5.47232e-37	3-1
Calm3	1.36974e-37	0.875155	1	0.717	4.44521e-33	3-1
Cotl1	2.60299e-35	0.873792	0.929	0.221	8.44747e-31	3-1
Cox6a1	2.0451e-26	0.87371	0.992	0.46	6.63695e-22	3-1
Rpl9	9.29127e-41	0.872464	0.995	0.788	3.0153e-36	3-1
Tuba1b	2.68011e-30	0.870741	0.997	0.655	8.69776e-26	3-1
Rps20	8.71284e-39	0.870692	0.997	0.664	2.82758e-34	3-1
1110004F10Rik	6.98593e-34	0.870061	0.954	0.336	2.26714e-29	3-1
Serbp1	4.66715e-37	0.86963	0.99	0.46	1.51463e-32	3-1
Calm1	1.67219e-33	0.869156	0.995	0.841	5.42677e-29	3-1
Btf3	7.26315e-38	0.869023	0.99	0.593	2.35711e-33	3-1
Sdhb	2.32142e-34	0.868832	0.962	0.283	7.5337e-30	3-1
Ndufv2	5.13764e-35	0.867436	0.959	0.292	1.66732e-30	3-1
Cox8a	2.91011e-39	0.86563	0.992	0.761	9.44418e-35	3-1
Cdkn1c	1.52789e-16	0.863394	0.445	0.018	4.95845e-12	3-1
Foxa1	1.44384e-26	0.861514	0.669	0.044	4.68571e-22	3-1
Hspa8	1.76784e-34	0.858636	1	0.912	5.73716e-30	3-1
Serp2	5.5416e-29	0.856496	0.934	0.363	1.79841e-24	3-1
Nedd8	4.75758e-38	0.854044	0.987	0.513	1.54398e-33	3-1
Polr2m	1.63753e-35	0.853702	0.972	0.345	5.31426e-31	3-1
Tmem256	1.15116e-32	0.851921	0.924	0.248	3.73587e-28	3-1
Rpl35a	2.56864e-41	0.848387	0.992	0.726	8.33601e-37	3-1
Dmrta2	2.05924e-28	0.845585	0.824	0.133	6.68285e-24	3-1
Fam103a1	7.9819e-35	0.844478	0.954	0.257	2.59037e-30	3-1
Eif5a	5.61995e-37	0.843711	0.995	0.54	1.82384e-32	3-1
Rpl12	6.04608e-37	0.840706	0.99	0.496	1.96214e-32	3-1
Camk2n2	1.68584e-14	0.837795	0.852	0.513	5.47106e-10	3-1
Pbx3	2.86926e-31	0.837375	0.855	0.15	9.31161e-27	3-1
Nhp2l1	2.40471e-17	0.833622	0.443	0	7.80401e-13	3-1
Dnajb6	1.79314e-34	0.833228	0.992	0.496	5.81929e-30	3-1
Map1lc3b	2.05579e-35	0.832753	0.987	0.416	6.67164e-31	3-1
Chst2	2.89382e-18	0.830732	0.735	0.239	9.3913e-14	3-1
Uqcrb	4.25274e-35	0.829571	0.975	0.496	1.38014e-30	3-1
Ndufs6	4.97904e-32	0.828645	0.924	0.336	1.61585e-27	3-1
Eif3k	9.14399e-33	0.827271	0.977	0.257	2.9675e-28	3-1
Eif3h	2.04893e-31	0.825625	0.969	0.434	6.64941e-27	3-1
Smarce1	8.84085e-41	0.824112	0.919	0.115	2.86912e-36	3-1
Csrp2	8.78958e-34	0.823697	0.885	0.168	2.85248e-29	3-1
Mrpl20	5.86058e-36	0.823004	0.962	0.274	1.90193e-31	3-1
Nipsnap3b	1.8747e-36	0.820201	0.903	0.168	6.08398e-32	3-1
Rpl5	2.19619e-31	0.818491	0.985	0.407	7.12731e-27	3-1
Timm8b	7.14268e-36	0.81627	0.975	0.363	2.31801e-31	3-1
Uqcrq	9.02046e-32	0.815215	0.982	0.558	2.92741e-27	3-1
Enc1	1.6208e-25	0.814482	0.827	0.23	5.25997e-21	3-1
Rpl36al	6.17986e-30	0.813794	0.967	0.354	2.00555e-25	3-1
Eif4a1	1.31231e-22	0.81344	1	0.637	4.25885e-18	3-1
Idh1	4.6678e-35	0.8133	0.934	0.177	1.51484e-30	3-1
Acat2	2.29989e-34	0.812029	0.903	0.195	7.46383e-30	3-1
Cct2	9.07371e-33	0.808639	0.967	0.301	2.94469e-28	3-1
Tceb1	1.80061e-17	0.807814	0.445	0	5.84353e-13	3-1
Hmgn2	1.92013e-31	0.807248	0.954	0.31	6.2314e-27	3-1
Gm1673	4.82708e-38	0.805356	0.997	0.779	1.56653e-33	3-1
Ctxn1	1.00888e-30	0.803759	0.952	0.345	3.27413e-26	3-1
Uqcr10	5.17334e-28	0.802551	0.954	0.469	1.6789e-23	3-1
Swi5	1.28868e-34	0.801397	0.987	0.531	4.18215e-30	3-1
Ubl5	1.26347e-36	0.800007	0.99	0.522	4.10033e-32	3-1
Crip2	1.449e-29	0.797697	0.962	0.372	4.70243e-25	3-1
Hsp90ab1	5.74102e-43	0.796135	1	0.947	1.86313e-38	3-1
Snrpd1	2.73421e-33	0.794675	0.964	0.319	8.87334e-29	3-1
Uqcc2	7.40622e-32	0.792296	0.964	0.336	2.40354e-27	3-1
Gng2	5.93835e-32	0.791251	0.982	0.478	1.92717e-27	3-1
Ap2m1	2.06801e-34	0.788734	0.987	0.575	6.71132e-30	3-1
Gnb1	4.9078e-24	0.784231	0.98	0.77	1.59273e-19	3-1
Enho	2.04687e-25	0.782983	0.791	0.186	6.64272e-21	3-1
Ube2s	5.81921e-32	0.782646	0.977	0.442	1.88851e-27	3-1
Park7	1.32691e-29	0.782487	0.952	0.372	4.30622e-25	3-1
Ap2s1	4.25387e-31	0.782228	0.985	0.442	1.38051e-26	3-1
Vdac1	1.06911e-30	0.782016	0.975	0.513	3.46957e-26	3-1
Ctnnbip1	9.96578e-32	0.780354	0.908	0.257	3.2342e-27	3-1
C130021I20Rik	2.80394e-37	0.779701	0.784	0.018	9.09964e-33	3-1
Cdc42	6.65168e-36	0.779509	0.992	0.673	2.15867e-31	3-1
Atp5d	4.40114e-34	0.778205	0.982	0.531	1.4283e-29	3-1
Thra	3.22637e-33	0.773867	0.992	0.699	1.04705e-28	3-1
Ndufb2	5.22477e-27	0.772168	0.944	0.442	1.6956e-22	3-1
Tsg101	2.0551e-30	0.77116	0.962	0.257	6.6694e-26	3-1
Zfos1	3.09455e-16	0.764198	0.42	0	1.00427e-11	3-1
Cxx1b	7.50951e-18	0.764005	0.453	0	2.43706e-13	3-1
Fxyd7	6.4453e-13	0.762335	0.817	0.593	2.09169e-08	3-1
Atp6v1e1	2.74588e-30	0.760867	0.939	0.248	8.91121e-26	3-1
Znhit1	2.68513e-34	0.760396	0.891	0.195	8.71405e-30	3-1
Ndufb9	5.83363e-29	0.759267	0.98	0.416	1.89319e-24	3-1
Clta	5.5676e-30	0.758719	0.992	0.513	1.80685e-25	3-1
Chchd6	5.49739e-32	0.758664	0.885	0.186	1.78407e-27	3-1
Sh3bgrl3	8.05094e-28	0.758343	0.944	0.398	2.61277e-23	3-1
Rpl22l1	2.02843e-26	0.75676	0.982	0.673	6.58286e-22	3-1
Cend1	2.65453e-21	0.755608	0.84	0.292	8.61474e-17	3-1
Ndufa8	4.19145e-29	0.751633	0.941	0.345	1.36025e-24	3-1
Prmt1	4.74203e-22	0.751249	0.975	0.442	1.53893e-17	3-1
Ccdc124	2.99161e-36	0.750807	0.916	0.177	9.70868e-32	3-1
Ebf3	5.94557e-25	0.748613	0.74	0.124	1.92952e-20	3-1
Hras	5.19042e-25	0.748015	0.924	0.425	1.68445e-20	3-1
Smdt1	1.49308e-30	0.74787	0.987	0.363	4.84551e-26	3-1
Gm10076	6.52682e-37	0.747447	0.916	0.142	2.11815e-32	3-1
Pfn1	1.39964e-27	0.747346	0.992	0.434	4.54224e-23	3-1
Psmb6	2.50367e-29	0.74634	0.977	0.469	8.12516e-25	3-1
Gpx4	5.60342e-30	0.744823	0.99	0.558	1.81848e-25	3-1
Nrep	1.59862e-31	0.743534	0.919	0.168	5.18801e-27	3-1
Eif3e	8.71679e-32	0.742104	0.957	0.221	2.82886e-27	3-1
2700094K13Rik	3.20794e-17	0.741472	0.44	0	1.04107e-12	3-1
Ndufa5	1.42491e-26	0.739744	0.972	0.434	4.62426e-22	3-1
Dpy30	4.67239e-35	0.737479	0.913	0.177	1.51633e-30	3-1
Edf1	2.48726e-29	0.73701	0.967	0.416	8.07191e-25	3-1
Wsb2	3.09866e-20	0.735929	0.842	0.372	1.00561e-15	3-1
Mrpl34	1.50129e-34	0.735704	0.901	0.177	4.87215e-30	3-1
Cct5	3.79625e-27	0.735657	0.977	0.372	1.232e-22	3-1
Ndufc1	2.37454e-27	0.734288	0.972	0.434	7.70609e-23	3-1
Txn1	1.26482e-27	0.732722	0.947	0.381	4.10471e-23	3-1
Rpl15	1.10449e-33	0.732616	0.992	0.761	3.58441e-29	3-1
Rala	1.12565e-31	0.730862	0.949	0.265	3.65306e-27	3-1
Atp5g2	4.69986e-26	0.729924	0.969	0.363	1.52525e-21	3-1
Cyth2	2.46706e-33	0.729788	0.944	0.204	8.00635e-29	3-1
Yeats4	5.48559e-36	0.729614	0.926	0.186	1.78024e-31	3-1
Timm13	1.25568e-29	0.729111	0.964	0.372	4.07504e-25	3-1
Fam57b	3.14979e-31	0.729063	0.952	0.23	1.0222e-26	3-1
Mmd	1.39693e-30	0.728467	0.858	0.159	4.53347e-26	3-1
Serf2	3.11929e-25	0.727764	0.98	0.442	1.0123e-20	3-1
Pfdn4	4.43635e-30	0.726934	0.931	0.248	1.43973e-25	3-1
Atp5b	4.59083e-23	0.725632	0.99	0.681	1.48986e-18	3-1
Ube2e3	1.89143e-26	0.721587	0.975	0.416	6.13825e-22	3-1
Arpc1a	1.08491e-26	0.720463	0.985	0.345	3.52086e-22	3-1
Fam131c	3.22519e-27	0.720135	0.684	0.053	1.04667e-22	3-1
Tmem35	4.7832e-15	0.719298	0.394	0	1.55229e-10	3-1
Ctbp1	7.95624e-28	0.719163	0.99	0.469	2.58204e-23	3-1
Guk1	9.1769e-27	0.717217	0.906	0.274	2.97818e-22	3-1
Nop10	5.85053e-27	0.716665	0.954	0.398	1.89867e-22	3-1
Fam195b	5.39569e-16	0.716403	0.415	0	1.75106e-11	3-1
Ndufab1	3.49654e-27	0.715049	0.959	0.46	1.13473e-22	3-1
Cacybp	4.96603e-26	0.714279	0.977	0.381	1.61163e-21	3-1
Mea1	7.14401e-32	0.713693	0.924	0.212	2.31845e-27	3-1
Ranbp1	8.96515e-28	0.712217	0.985	0.434	2.90946e-23	3-1
Mrpl30	2.02407e-32	0.711507	0.906	0.212	6.5687e-28	3-1
Hdac2	1.49318e-23	0.711098	0.972	0.345	4.84582e-19	3-1
Mkrn1	1.02598e-26	0.708298	0.952	0.345	3.3296e-22	3-1
Hpcal1	1.49993e-20	0.707955	0.832	0.292	4.86772e-16	3-1
Zfp580	3.88093e-32	0.705975	0.85	0.168	1.25948e-27	3-1
Cfl2	4.89962e-30	0.705529	0.975	0.407	1.59007e-25	3-1
Rac3	2.79115e-25	0.704973	0.987	0.655	9.05811e-21	3-1
Mrps33	1.45655e-28	0.704006	0.903	0.221	4.72694e-24	3-1
Fabp3	1.9668e-19	0.703687	0.83	0.363	6.38286e-15	3-1
Stx7	5.1415e-28	0.702629	0.949	0.336	1.66857e-23	3-1
Cbln1	9.82082e-21	0.70215	0.71	0.159	3.18715e-16	3-1
Elavl2	5.78142e-26	0.699636	0.98	0.389	1.87625e-21	3-1
Rpl30	5.07244e-34	0.698196	0.99	0.735	1.64616e-29	3-1
1110008P14Rik	2.59753e-27	0.697881	0.845	0.212	8.42978e-23	3-1
Psip1	2.5245e-28	0.69704	0.972	0.434	8.19277e-24	3-1
Hist3h2a	8.34798e-24	0.696083	0.679	0.088	2.70917e-19	3-1
Uqcrfs1	1.90675e-25	0.696074	0.969	0.354	6.18796e-21	3-1
Dtnbp1	8.95577e-35	0.694886	0.852	0.115	2.90642e-30	3-1
Akirin2	4.69514e-32	0.693241	0.936	0.204	1.52371e-27	3-1
Marcks	5.33819e-31	0.691318	1	0.717	1.7324e-26	3-1
Anapc11	2.5881e-29	0.688656	0.921	0.248	8.39915e-25	3-1
Rab2a	3.43403e-25	0.685202	0.992	0.478	1.11444e-20	3-1
Prelid1	8.44683e-29	0.684911	0.931	0.283	2.74125e-24	3-1
Cript	3.19354e-32	0.684309	0.908	0.204	1.0364e-27	3-1
Hspe1	1.45736e-27	0.683918	0.972	0.425	4.72956e-23	3-1
Lsm4	3.13782e-29	0.683312	0.896	0.186	1.01832e-24	3-1
Sh3bgrl	4.46994e-29	0.683194	0.906	0.212	1.45063e-24	3-1
Ndufs4	2.29459e-28	0.682291	0.959	0.283	7.44662e-24	3-1
Map1b	3.40726e-33	0.681878	1	0.929	1.10576e-28	3-1
Rnf7	1.46942e-26	0.680859	0.969	0.398	4.76871e-22	3-1
Snrpf	2.76927e-29	0.680422	0.964	0.301	8.98712e-25	3-1
Oaz2	5.1585e-28	0.679787	0.954	0.31	1.67409e-23	3-1
Ndufa2	1.33081e-26	0.679571	0.959	0.363	4.31886e-22	3-1
Mrpl42	8.49994e-35	0.679216	0.898	0.168	2.75849e-30	3-1
Tomm5	3.93091e-33	0.679128	0.845	0.133	1.2757e-28	3-1
Eef1b2	3.77479e-29	0.678691	0.987	0.575	1.22503e-24	3-1
Zfp706	2.67871e-26	0.678335	0.977	0.372	8.69321e-22	3-1
Snrpd3	2.23461e-30	0.678028	0.941	0.248	7.25198e-26	3-1
Polr2f	1.42116e-30	0.677097	0.939	0.221	4.61208e-26	3-1
Ndufb7	5.86841e-27	0.676985	0.962	0.292	1.90448e-22	3-1
Btf3l4	7.29481e-28	0.676076	0.784	0.106	2.36738e-23	3-1
Tubb2a	6.62426e-20	0.672699	1	0.973	2.14977e-15	3-1
Scand1	1.37528e-27	0.672561	0.957	0.354	4.4632e-23	3-1
Polr2i	1.88452e-31	0.670009	0.878	0.177	6.11583e-27	3-1
Set	2.72327e-27	0.669951	0.975	0.549	8.83783e-23	3-1
Sumo1	1.30193e-26	0.669597	0.972	0.425	4.22516e-22	3-1
Tagln3	1.18032e-18	0.669211	0.977	0.451	3.83049e-14	3-1
Eif1ax	2.69508e-33	0.669155	0.842	0.106	8.74635e-29	3-1
Ywhab	1.08415e-24	0.668183	0.982	0.619	3.51839e-20	3-1
Vdac2	1.25491e-23	0.667284	0.954	0.407	4.07257e-19	3-1
Ndufa7	1.26506e-27	0.665664	0.977	0.469	4.1055e-23	3-1
H2afy2	1.16055e-22	0.665142	0.98	0.345	3.76635e-18	3-1
Morf4l1	1.03313e-27	0.664146	1	0.664	3.3528e-23	3-1
Mdh2	2.08459e-23	0.663906	0.975	0.451	6.76513e-19	3-1
Dut	2.81364e-33	0.663675	0.858	0.133	9.13111e-29	3-1
Arpc5	2.27237e-25	0.66336	0.959	0.336	7.37452e-21	3-1
Rab6a	2.39597e-27	0.661265	0.98	0.611	7.77563e-23	3-1
Stmn2	1.39488e-25	0.659308	1	0.929	4.5268e-21	3-1
Cbln4	1.9354e-10	0.658996	0.42	0.097	6.28097e-06	3-1
Ldhb	1.45003e-22	0.657684	0.939	0.336	4.70578e-18	3-1
Npm1	2.13224e-27	0.657683	0.99	0.681	6.91976e-23	3-1
Uqcrc2	6.17386e-28	0.657226	0.939	0.274	2.0036e-23	3-1
Fkbp3	2.12856e-22	0.65428	0.947	0.469	6.90783e-18	3-1
Bri3	2.43052e-25	0.653473	0.959	0.31	7.88775e-21	3-1
Bex4	5.32333e-24	0.652738	0.959	0.398	1.72758e-19	3-1
Cox14	6.45152e-30	0.652491	0.908	0.204	2.09371e-25	3-1
Tpgs2	9.34659e-29	0.652261	0.855	0.159	3.03325e-24	3-1
Mettl9	1.45501e-28	0.651657	0.944	0.292	4.72193e-24	3-1
Ube2e1	1.20789e-28	0.651504	0.944	0.239	3.91997e-24	3-1
Coa3	6.82904e-25	0.651306	0.936	0.363	2.21623e-20	3-1
Atp5a1	2.2101e-24	0.651259	0.99	0.628	7.17245e-20	3-1
Dda1	1.03155e-24	0.650874	0.934	0.345	3.34768e-20	3-1
Pomp	6.61774e-25	0.647561	0.969	0.434	2.14765e-20	3-1
Ndufb4	2.31887e-24	0.646607	0.911	0.336	7.52542e-20	3-1
Denr	3.8242e-28	0.645526	0.924	0.23	1.24107e-23	3-1
Ube2d2a	1.54701e-27	0.645337	0.995	0.496	5.0205e-23	3-1
Med28	7.33659e-31	0.643387	0.908	0.204	2.38095e-26	3-1
Rab18	7.11479e-25	0.643296	0.939	0.31	2.30896e-20	3-1
Rab11a	5.73282e-28	0.642893	0.959	0.248	1.86047e-23	3-1
Ndufa6	4.06477e-24	0.641822	0.931	0.319	1.31914e-19	3-1
Polr2j	4.61118e-30	0.64129	0.926	0.221	1.49646e-25	3-1
Vapa	8.55697e-27	0.640921	0.992	0.584	2.777e-22	3-1
Gnb2	9.29801e-30	0.639509	1	0.788	3.01748e-25	3-1
Pgls	1.30112e-24	0.638224	0.941	0.327	4.22252e-20	3-1
Csnk1e	9.15261e-26	0.637612	0.954	0.319	2.9703e-21	3-1
Ndufb8	2.70527e-22	0.637502	0.98	0.478	8.77941e-18	3-1
Mrpl52	1.14342e-24	0.637324	0.957	0.381	3.71075e-20	3-1
Psma6	8.47561e-26	0.635244	0.929	0.274	2.75059e-21	3-1
Pdcd5	1.31582e-23	0.635035	0.949	0.381	4.27024e-19	3-1
Ypel3	1.33443e-22	0.634305	0.972	0.478	4.33063e-18	3-1
Gpx1	4.67436e-29	0.633925	0.868	0.177	1.51697e-24	3-1
Drap1	3.11089e-24	0.633366	0.916	0.319	1.00958e-19	3-1
Pbx1	2.11668e-08	0.632609	0.947	0.646	0.000686928	3-1
Polr1d	2.25534e-26	0.632108	0.919	0.248	7.31924e-22	3-1
Ap3s1	2.12754e-27	0.631952	0.926	0.257	6.90452e-23	3-1
Arl3	8.37024e-26	0.631942	0.906	0.257	2.71639e-21	3-1
Fscn1	5.79632e-22	0.630942	0.985	0.469	1.88108e-17	3-1
Vti1b	4.26438e-28	0.6303	0.929	0.221	1.38392e-23	3-1
Fkbp1a	1.43784e-28	0.630063	0.987	0.593	4.66623e-24	3-1
Tomm22	4.00387e-25	0.628501	0.954	0.363	1.29938e-20	3-1
Uchl1	4.21051e-24	0.626754	0.995	0.894	1.36644e-19	3-1
Khdrbs1	5.25135e-24	0.62672	0.949	0.292	1.70422e-19	3-1
Mgst3	1.89914e-20	0.625376	0.911	0.336	6.16327e-16	3-1
Pcp4	1.16886e-07	0.622655	0.748	0.469	0.0037933	3-1
Ran	1.0511e-23	0.621924	0.992	0.575	3.41113e-19	3-1
Gapdh	2.02353e-26	0.621648	0.995	0.912	6.56695e-22	3-1
Mlf2	1.15698e-21	0.618219	0.98	0.487	3.75475e-17	3-1
Stx12	2.07229e-25	0.618078	0.936	0.265	6.7252e-21	3-1
Cops9	1.28194e-09	0.61776	0.506	0.239	4.16029e-05	3-1
PISD	3.65448e-15	0.617099	0.397	0	1.18599e-10	3-1
Snx3	2.60797e-22	0.616006	0.901	0.398	8.46363e-18	3-1
Lamtor2	1.4211e-27	0.615642	0.901	0.195	4.61188e-23	3-1
Rbx1	2.26413e-25	0.615376	0.985	0.513	7.34779e-21	3-1
H2afv	3.23975e-29	0.615245	0.809	0.106	1.05139e-24	3-1
Carhsp1	2.01021e-28	0.612197	0.723	0.071	6.52374e-24	3-1
Tomm7	3.17524e-25	0.611356	0.929	0.372	1.03046e-20	3-1
Mzt1	1.59256e-27	0.611013	0.852	0.177	5.16832e-23	3-1
Trp53i11	1.75731e-26	0.610843	0.679	0.044	5.70299e-22	3-1
Slc25a5	3.56348e-19	0.610402	0.936	0.354	1.15646e-14	3-1
A2ml1	2.50371e-11	0.610078	0.448	0.106	8.12529e-07	3-1
Chchd10	3.46321e-09	0.609907	0.659	0.327	0.000112391	3-1
Mrps24	1.38577e-25	0.609633	0.888	0.257	4.49723e-21	3-1
1110001J03Rik	9.36848e-16	0.609582	0.41	0	3.04035e-11	3-1
Dgcr6	6.31908e-32	0.609469	0.88	0.142	2.05073e-27	3-1
Atxn10	6.54128e-22	0.608346	0.977	0.425	2.12284e-17	3-1
Tusc2	2.81598e-29	0.607853	0.858	0.159	9.13869e-25	3-1
Snn	6.35154e-30	0.606738	0.819	0.124	2.06126e-25	3-1
Scoc	3.34414e-22	0.60508	0.944	0.46	1.08527e-17	3-1
Smarcd1	9.82351e-34	0.603922	0.824	0.088	3.18802e-29	3-1
Hnrnpab	2.11613e-24	0.603542	0.977	0.31	6.86749e-20	3-1
Mrpl43	1.04939e-26	0.602447	0.888	0.204	3.40558e-22	3-1
Uba52	1.56174e-29	0.602434	0.903	0.159	5.0683e-25	3-1
Csnk2b	6.2794e-27	0.600665	0.926	0.221	2.03785e-22	3-1
Ube2v2	2.25612e-21	0.597177	0.972	0.425	7.32179e-17	3-1
En1	2.56658e-08	0.596889	0.229	0	0.000832931	3-1
Pdha1	5.4494e-28	0.596395	0.812	0.15	1.76849e-23	3-1
Chchd1	1.37796e-25	0.595432	0.885	0.212	4.47191e-21	3-1
Elob	0.00140909	0.594658	0.514	0.619	1	3-1
Sarnp	2.81036e-28	0.594364	0.885	0.212	9.12047e-24	3-1
Bzw2	4.03255e-21	0.593437	0.949	0.363	1.30868e-16	3-1
2210013O21Rik	3.9726e-14	0.591663	0.374	0	1.28923e-09	3-1
Eno1	6.84462e-19	0.589646	0.913	0.363	2.22129e-14	3-1
Cetn3	5.76794e-24	0.589304	0.957	0.372	1.87187e-19	3-1
U2af1	9.44103e-28	0.589206	0.947	0.23	3.0639e-23	3-1
Psmb5	1.85501e-19	0.588961	0.949	0.469	6.02005e-15	3-1
2810428I15Rik	3.65449e-15	0.585191	0.397	0	1.18599e-10	3-1
Fez1	1.04525e-18	0.585178	0.982	0.487	3.39214e-14	3-1
Ndufa4	5.44184e-19	0.584145	0.995	0.779	1.76604e-14	3-1
Ndufb10	1.57542e-22	0.580607	0.982	0.442	5.11271e-18	3-1
Cct7	1.43034e-18	0.580045	0.941	0.372	4.64187e-14	3-1
Tonsl	2.45051e-12	0.579359	0.509	0.124	7.95264e-08	3-1
0610012G03Rik	1.64045e-22	0.579258	0.924	0.327	5.32377e-18	3-1
Ubald2	5.53554e-27	0.578747	0.824	0.15	1.79645e-22	3-1
Sh3bp1	4.91764e-15	0.578671	0.405	0.009	1.59592e-10	3-1
Ndufa12	1.05514e-21	0.578081	0.939	0.381	3.42426e-17	3-1
Oaz1	1.37543e-28	0.577973	0.997	0.805	4.46368e-24	3-1
Nefl	2.52322e-11	0.577533	0.812	0.442	8.18861e-07	3-1
H1fx	1.04235e-20	0.576791	0.906	0.292	3.38272e-16	3-1
Sec61b	1.22634e-22	0.576577	0.957	0.31	3.97985e-18	3-1
Rps19bp1	1.22336e-32	0.576302	0.875	0.133	3.97018e-28	3-1
Rheb	1.55102e-21	0.576221	0.957	0.46	5.03351e-17	3-1
Cct4	4.8645e-22	0.576126	0.959	0.327	1.57868e-17	3-1
Psmb7	5.66232e-22	0.575919	0.954	0.354	1.83759e-17	3-1
Bola2	5.89028e-25	0.5759	0.858	0.212	1.91157e-20	3-1
Rnf14	3.5002e-19	0.575505	0.908	0.407	1.13592e-14	3-1
Grcc10	1.40532e-31	0.574999	0.83	0.115	4.5607e-27	3-1
Akr1a1	5.00255e-22	0.574884	0.972	0.451	1.62348e-17	3-1
Ubb	1.66967e-16	0.57428	1	0.965	5.41858e-12	3-1
Thoc7	2.34247e-23	0.572182	0.896	0.274	7.60201e-19	3-1
Nrn1	1.4269e-16	0.57118	0.682	0.15	4.63071e-12	3-1
Eef1e1	5.34616e-24	0.569779	0.906	0.301	1.73499e-19	3-1
Mff	8.43873e-21	0.568557	0.964	0.46	2.73862e-16	3-1
Skp1a	1.28593e-21	0.567403	0.919	0.283	4.17324e-17	3-1
Cfdp1	2.15461e-23	0.567195	0.936	0.31	6.99236e-19	3-1
Gtf2h5	1.50135e-20	0.566528	0.936	0.434	4.87234e-16	3-1
6330403K07Rik	1.25201e-24	0.566117	0.997	0.867	4.06314e-20	3-1
Dctn3	2.88637e-20	0.564966	0.944	0.363	9.36715e-16	3-1
Rpl10a	2.66698e-21	0.564485	0.992	0.743	8.65516e-17	3-1
Mpc1	4.43101e-16	0.563317	0.896	0.496	1.438e-11	3-1
Kctd13	3.68013e-26	0.562572	0.88	0.204	1.19431e-21	3-1
Cystm1	3.98755e-23	0.561875	0.807	0.204	1.29408e-18	3-1
Srp14	1.04423e-21	0.558227	0.98	0.522	3.38883e-17	3-1
Pkig	8.68592e-25	0.55797	0.812	0.168	2.81884e-20	3-1
Samd10	5.91644e-26	0.557723	0.919	0.248	1.92006e-21	3-1
Ywhag	2.11513e-20	0.557225	0.992	0.655	6.86423e-16	3-1
Tmem258	1.03516e-24	0.556881	0.931	0.265	3.35941e-20	3-1
Bag1	8.08544e-27	0.556003	0.908	0.257	2.62397e-22	3-1
Jpt1	0.000666153	0.555919	0.514	0.522	1	3-1
Selenoh	3.07954e-09	0.555819	0.506	0.221	9.99403e-05	3-1
D930028M14Rik	0.000560329	0.555773	0.163	0.035	1	3-1
Hba-a1	2.99483e-09	0.554737	0.254	0	9.71912e-05	3-1
Rnf5	1.52433e-24	0.554421	0.921	0.248	4.94689e-20	3-1
Sae1	2.97763e-28	0.554136	0.835	0.142	9.6633e-24	3-1
Bbip1	4.90729e-22	0.553456	0.883	0.257	1.59256e-17	3-1
Lamtor1	3.87242e-28	0.553414	0.847	0.168	1.25672e-23	3-1
Ndufa3	1.80197e-18	0.553269	0.969	0.478	5.84792e-14	3-1
Psmb4	4.36586e-21	0.552618	0.939	0.345	1.41685e-16	3-1
Pole4	4.0573e-30	0.551657	0.822	0.115	1.31672e-25	3-1
Fkbp4	1.07413e-19	0.55155	0.962	0.363	3.48588e-15	3-1
Zc3h15	3.50374e-22	0.551294	0.944	0.31	1.13707e-17	3-1
2900011O08Rik	8.39853e-20	0.550645	0.916	0.372	2.72558e-15	3-1
Palm	5.19388e-22	0.550267	0.939	0.327	1.68557e-17	3-1
Ppp1ca	3.54101e-18	0.549824	0.972	0.469	1.14916e-13	3-1
Tbcb	6.75096e-19	0.549767	0.957	0.478	2.19089e-14	3-1
Pin1	4.18773e-20	0.549642	0.916	0.336	1.35904e-15	3-1
Mrpl18	2.34671e-27	0.549315	0.868	0.177	7.61578e-23	3-1
Higd2a	5.37549e-21	0.549175	0.929	0.327	1.74451e-16	3-1
Bod1	4.85892e-24	0.548301	0.847	0.248	1.57687e-19	3-1
Eif1b	3.49361e-20	0.547572	0.977	0.558	1.13378e-15	3-1
Kifap3	1.51651e-20	0.547078	0.934	0.345	4.92153e-16	3-1
Abhd17a	2.13679e-21	0.545758	0.845	0.265	6.93453e-17	3-1
Fdps	1.08905e-13	0.545046	0.911	0.451	3.5343e-09	3-1
Sumo3	2.42932e-22	0.543034	0.941	0.327	7.88389e-18	3-1
Lmo3	8.54256e-13	0.542582	0.415	0.044	2.77232e-08	3-1
Trappc6b	2.09233e-20	0.541936	0.944	0.363	6.79025e-16	3-1
Lsm1	2.89666e-23	0.541761	0.885	0.23	9.40054e-19	3-1
Mrpl12	1.17347e-22	0.541403	0.898	0.283	3.80825e-18	3-1
Fam134a	6.67724e-14	0.540326	0.369	0	2.16696e-09	3-1
Trappc4	3.41858e-21	0.539011	0.977	0.416	1.10943e-16	3-1
Dctpp1	9.89245e-30	0.538493	0.802	0.115	3.2104e-25	3-1
Elof1	3.51992e-22	0.538112	0.908	0.292	1.14232e-17	3-1
Fam32a	2.07816e-23	0.538106	0.888	0.248	6.74426e-19	3-1
Bloc1s2	1.1912e-27	0.537726	0.86	0.177	3.86581e-23	3-1
Smarcb1	1.70678e-24	0.53726	0.883	0.23	5.53902e-20	3-1
Psma7	1.60011e-18	0.537085	0.975	0.619	5.19285e-14	3-1
Bmyc	1.74066e-18	0.533983	0.88	0.372	5.64896e-14	3-1
Rcan2	1.08468e-27	0.531967	0.814	0.133	3.5201e-23	3-1
Raly	4.49284e-24	0.531906	0.916	0.257	1.45806e-19	3-1
Atox1	2.72294e-25	0.531287	0.898	0.212	8.83677e-21	3-1
Nrgn	0.000491658	0.530601	0.435	0.265	1	3-1
Dynlt1f	1.82863e-28	0.53038	0.725	0.071	5.93444e-24	3-1
Ost4	3.14669e-26	0.529274	0.837	0.168	1.0212e-21	3-1
Ppp2r1a	2.08615e-17	0.529262	0.954	0.354	6.77018e-13	3-1
Phf5a	4.92795e-24	0.527313	0.893	0.239	1.59927e-19	3-1
Prdx3	1.00223e-27	0.526902	0.781	0.115	3.25254e-23	3-1
Ssu72	5.38592e-25	0.526878	0.906	0.257	1.74789e-20	3-1
Myl12b	1.41914e-17	0.526818	0.954	0.496	4.60555e-13	3-1
Actr3	1.53644e-21	0.52603	0.952	0.327	4.9862e-17	3-1
Prkra	5.94463e-26	0.525899	0.847	0.177	1.92921e-21	3-1
Myl6	9.99776e-21	0.524607	0.992	0.708	3.24457e-16	3-1
Mtx2	2.96173e-20	0.524602	0.891	0.283	9.61169e-16	3-1
Mrps21	3.94933e-23	0.524308	0.878	0.257	1.28168e-18	3-1
Ppp1r1a	1.89005e-18	0.523857	0.789	0.239	6.13378e-14	3-1
Mrpl28	7.20424e-26	0.522451	0.858	0.204	2.33799e-21	3-1
Arpc3	1.40439e-19	0.522159	0.926	0.292	4.55768e-15	3-1
Cbx3	1.90917e-13	0.521987	0.964	0.558	6.19582e-09	3-1
Abhd8	7.92329e-20	0.52129	0.898	0.327	2.57134e-15	3-1
Psmb2	6.66847e-18	0.520404	0.954	0.425	2.16412e-13	3-1
Srsf3	9.07284e-19	0.520165	0.99	0.681	2.94441e-14	3-1
Gtf2a2	6.1251e-21	0.519468	0.941	0.389	1.98778e-16	3-1
Hpca	6.19838e-19	0.518042	0.606	0.088	2.01156e-14	3-1
Neurod1	6.0002e-17	0.517805	0.478	0.027	1.94724e-12	3-1
Banf1	1.26577e-25	0.517642	0.827	0.168	4.10779e-21	3-1
Mrpl14	2.13133e-25	0.516884	0.87	0.212	6.91682e-21	3-1
Sh3bp5	3.94834e-25	0.51678	0.873	0.212	1.28136e-20	3-1
Rpl18	1.19239e-19	0.516703	0.995	0.735	3.86968e-15	3-1
Dnaja1	4.15566e-17	0.516506	0.99	0.69	1.34863e-12	3-1
Gm9843	1.38854e-12	0.515111	0.338	0	4.50624e-08	3-1
Hcfc1r1	3.00096e-20	0.515003	0.916	0.345	9.73903e-16	3-1
Mcrs1	6.18658e-28	0.514223	0.891	0.204	2.00773e-23	3-1
Dcx	2.33284e-15	0.512965	0.954	0.46	7.57078e-11	3-1
Bnip3l	1.18501e-22	0.512912	0.936	0.31	3.84571e-18	3-1
1110008F13Rik	3.93768e-23	0.512279	0.921	0.301	1.27789e-18	3-1
Nxph4	9.67622e-23	0.512112	0.664	0.062	3.14022e-18	3-1
Pdzrn3	1.24018e-23	0.512026	0.578	0.009	4.02476e-19	3-1
Ppa1	4.44889e-19	0.510979	0.868	0.283	1.4438e-14	3-1
Epn1	3.22015e-18	0.510886	0.931	0.363	1.04504e-13	3-1
B230219D22Rik	2.212e-20	0.509861	0.911	0.274	7.17862e-16	3-1
Cdkn1a	2.16964e-16	0.507932	0.628	0.115	7.04113e-12	3-1
Psma2	2.07945e-16	0.507727	0.939	0.389	6.74844e-12	3-1
Cnn3	1.45515e-12	0.507134	0.407	0.035	4.72239e-08	3-1
Cfap36	3.85814e-23	0.50692	0.804	0.204	1.25208e-18	3-1
Glrx3	2.55204e-19	0.506216	0.921	0.319	8.28215e-15	3-1
Smap1	7.37983e-21	0.50548	0.883	0.274	2.39498e-16	3-1
Brk1	3.82933e-19	0.505359	0.964	0.416	1.24273e-14	3-1
Chtop	1.68818e-25	0.505005	0.893	0.221	5.47866e-21	3-1
Igfbpl1	9.97412e-08	0.503852	0.226	0.009	0.0032369	3-1
Gm8730	3.09763e-13	0.50213	0.354	0	1.00527e-08	3-1
Mrps36	1.75498e-26	0.501748	0.835	0.177	5.69545e-22	3-1
Coprs	1.06256e-21	0.501705	0.863	0.23	3.44833e-17	3-1
Ube2m	2.60274e-12	0.499489	0.865	0.513	8.44666e-08	3-1
Pfdn6	5.31054e-23	0.499462	0.888	0.265	1.72343e-18	3-1
Traf4	7.86189e-25	0.498545	0.697	0.071	2.55142e-20	3-1
Rpl22	1.04077e-15	0.497984	0.964	0.531	3.37762e-11	3-1
Ppp1cc	3.83468e-20	0.497961	0.929	0.327	1.24447e-15	3-1
Stum	3.85357e-17	0.495457	0.496	0.035	1.2506e-12	3-1
Bax	1.06468e-18	0.495124	0.975	0.416	3.45522e-14	3-1
Acat1	3.04091e-18	0.495007	0.903	0.336	9.86866e-14	3-1
Ap4s1	1.43214e-24	0.493111	0.802	0.159	4.64772e-20	3-1
Tax1bp3	5.27505e-23	0.49278	0.58	0.027	1.71191e-18	3-1
Nudt19	9.31216e-23	0.492718	0.723	0.124	3.02207e-18	3-1
Trappc2l	1.60516e-19	0.492105	0.911	0.31	5.20924e-15	3-1
Uqcrc1	4.05468e-15	0.488904	0.913	0.398	1.31586e-10	3-1
Rab5c	4.36347e-27	0.488032	0.858	0.177	1.41608e-22	3-1
St13	8.24968e-16	0.487421	0.929	0.425	2.67727e-11	3-1
Sms	1.57665e-17	0.485806	0.947	0.46	5.1167e-13	3-1
Klhdc8a	1.47944e-26	0.485115	0.646	0.027	4.80121e-22	3-1
Taf10	4.37326e-20	0.484816	0.74	0.186	1.41925e-15	3-1
Pdzrn4	1.88856e-19	0.484815	0.771	0.177	6.12894e-15	3-1
Bcas2	1.95921e-15	0.484427	0.964	0.478	6.35822e-11	3-1
Mir124-2hg	1.53067e-22	0.483559	0.835	0.168	4.96749e-18	3-1
Samd14	6.01073e-20	0.483473	0.934	0.327	1.95066e-15	3-1
Pde6d	2.34059e-26	0.483258	0.832	0.177	7.59593e-22	3-1
Hnrnpk	1.24803e-12	0.482835	0.997	0.761	4.05024e-08	3-1
Srp54b	7.20958e-13	0.48197	0.364	0.009	2.33973e-08	3-1
Ehd1	1.41405e-28	0.480899	0.802	0.097	4.58903e-24	3-1
Gltscr2	5.15286e-14	0.47969	0.372	0	1.67226e-09	3-1
D8Ertd738e	2.73149e-17	0.479272	0.931	0.381	8.86451e-13	3-1
Rgma	1.42097e-22	0.478858	0.674	0.071	4.61147e-18	3-1
Klhl23	3.42607e-26	0.478831	0.774	0.133	1.11186e-21	3-1
Rpl23a-ps3	3.09763e-13	0.478227	0.354	0	1.00528e-08	3-1
Bhlhe22	5.59812e-18	0.477368	0.455	0	1.81676e-13	3-1
Pfdn1	1.07242e-17	0.476147	0.957	0.389	3.48033e-13	3-1
Ddah1	5.5351e-16	0.475635	0.748	0.239	1.79631e-11	3-1
Ddc	9.97261e-06	0.475545	0.242	0.053	0.323641	3-1
Lin7c	2.72725e-20	0.475279	0.908	0.292	8.85075e-16	3-1
Rprm	1.34861e-09	0.474394	0.672	0.292	4.37665e-05	3-1
Th	1.12321e-07	0.473937	0.229	0.009	0.00364516	3-1
Gsk3b	3.79241e-17	0.473473	0.997	0.735	1.23075e-12	3-1
Clip3	3.34428e-19	0.472979	0.845	0.265	1.08532e-14	3-1
Fam204a	4.52328e-27	0.472876	0.74	0.088	1.46794e-22	3-1
Csk	2.25616e-23	0.472636	0.868	0.212	7.32192e-19	3-1
Ifngr2	1.62039e-21	0.472617	0.804	0.204	5.25865e-17	3-1
Paip1	4.57186e-24	0.472592	0.83	0.195	1.48371e-19	3-1
Tmpo	2.1914e-22	0.471382	0.725	0.115	7.11174e-18	3-1
Dbndd1	1.71706e-29	0.470725	0.768	0.071	5.57237e-25	3-1
Mrpl33	3.80767e-18	0.47049	0.883	0.327	1.2357e-13	3-1
Bex1	1.86213e-16	0.469826	0.969	0.646	6.04317e-12	3-1
Nucks1	8.5707e-21	0.469621	0.88	0.257	2.78145e-16	3-1
Nfu1	1.02919e-21	0.469474	0.875	0.239	3.34003e-17	3-1
Polr2k	1.52821e-22	0.469302	0.885	0.248	4.9595e-18	3-1
Txnl4a	1.09735e-21	0.469132	0.832	0.221	3.56123e-17	3-1
Rnf11	2.73468e-17	0.469029	0.898	0.354	8.87487e-13	3-1
Clec2l	1.05369e-12	0.468756	0.651	0.212	3.41954e-08	3-1
Sdhaf4	6.60395e-26	0.468672	0.822	0.15	2.14318e-21	3-1
Ntn1	5.76957e-19	0.468504	0.57	0.053	1.8724e-14	3-1
Eif3i	6.18513e-19	0.468385	0.936	0.31	2.00726e-14	3-1
Pmvk	1.6655e-16	0.468175	0.883	0.327	5.40505e-12	3-1
Gemin7	3.82908e-26	0.468138	0.807	0.142	1.24265e-21	3-1
Zcchc17	3.12269e-23	0.468027	0.845	0.195	1.01341e-18	3-1
Gdap1l1	1.65892e-22	0.467627	0.916	0.248	5.3837e-18	3-1
Cmas	4.35686e-17	0.466629	0.931	0.31	1.41393e-12	3-1
Trim32	1.41455e-20	0.466005	0.873	0.221	4.59065e-16	3-1
Mrps17	3.49316e-19	0.465566	0.893	0.301	1.13364e-14	3-1
Ndufa1	5.22037e-15	0.464049	0.952	0.434	1.69417e-10	3-1
Esd	3.06478e-18	0.463832	0.837	0.239	9.94615e-14	3-1
Ier3ip1	3.02108e-15	0.463387	0.954	0.398	9.80433e-11	3-1
Uchl3	1.00168e-16	0.461885	0.924	0.327	3.25075e-12	3-1
Vdac3	3.83773e-14	0.461364	0.957	0.531	1.24546e-09	3-1
Hypk	5.69856e-18	0.461242	0.845	0.292	1.84936e-13	3-1
B630019K06Rik	1.39469e-10	0.460539	0.858	0.381	4.5262e-06	3-1
Cdk5r1	3.39507e-17	0.460458	0.975	0.434	1.1018e-12	3-1
Rps27rt	1.07861e-21	0.460277	0.623	0.062	3.50042e-17	3-1
Cdo1	4.05418e-24	0.460119	0.779	0.142	1.3157e-19	3-1
Gdi2	1.77193e-16	0.45998	0.975	0.451	5.75045e-12	3-1
Rbmx	2.16018e-21	0.459867	0.746	0.159	7.01043e-17	3-1
Arpc2	1.67078e-16	0.459479	0.985	0.513	5.42217e-12	3-1
Bok	2.746e-26	0.458866	0.715	0.062	8.91158e-22	3-1
Ywhaz	2.17946e-15	0.458818	0.975	0.646	7.073e-11	3-1
Snrpb2	1.55107e-26	0.458345	0.842	0.15	5.0337e-22	3-1
Ankra2	1.6503e-18	0.458022	0.906	0.301	5.35571e-14	3-1
Vps29	3.29894e-17	0.457715	0.934	0.345	1.07061e-12	3-1
Usp50	3.15863e-29	0.456987	0.712	0.035	1.02507e-24	3-1
Dynll2	1.86393e-16	0.456264	0.985	0.673	6.04903e-12	3-1
Emc6	2.02902e-17	0.455977	0.934	0.381	6.58477e-13	3-1
Rpl10-ps3	3.78953e-17	0.455021	0.466	0.018	1.22981e-12	3-1
Apex1	2.3201e-25	0.454201	0.802	0.15	7.52944e-21	3-1
Med19	7.26648e-26	0.45419	0.74	0.097	2.35819e-21	3-1
Vps72	6.38478e-24	0.453791	0.781	0.15	2.07205e-19	3-1
Ndufb3	2.12032e-18	0.452825	0.944	0.363	6.88106e-14	3-1
Unc119	1.83689e-19	0.452371	0.865	0.274	5.96127e-15	3-1
Ict1	1.77715e-12	0.452097	0.336	0	5.7674e-08	3-1
1110065P20Rik	9.12401e-19	0.451971	0.85	0.265	2.96101e-14	3-1
Atp6v1c1	1.03001e-20	0.451809	0.835	0.212	3.3427e-16	3-1
Cops6	3.46126e-20	0.451478	0.898	0.265	1.12328e-15	3-1
Ntan1	7.04835e-23	0.451444	0.847	0.195	2.2874e-18	3-1
Chmp4b	2.91341e-21	0.451415	0.847	0.204	9.45489e-17	3-1
Hes6	1.03273e-21	0.451292	0.74	0.124	3.35152e-17	3-1
Eif2s2	1.3667e-18	0.450532	0.972	0.372	4.43534e-14	3-1
Fam19a5	6.93979e-10	0.45051	0.718	0.345	2.25217e-05	3-1
Rab10	1.10934e-14	0.45013	0.969	0.434	3.60016e-10	3-1
Blcap	2.67069e-14	0.449703	0.975	0.504	8.6672e-10	3-1
Limd2	1.82154e-25	0.449672	0.789	0.124	5.91144e-21	3-1
Foxa2	2.73209e-15	0.449665	0.433	0.018	8.86645e-11	3-1
Selt	6.58619e-13	0.449492	0.346	0	2.13742e-08	3-1
C1d	2.35071e-14	0.449124	0.967	0.522	7.62875e-10	3-1
Trmt112	1.24668e-16	0.448385	0.916	0.336	4.04587e-12	3-1
Snrpc	4.42827e-22	0.448315	0.873	0.23	1.43711e-17	3-1
Ube2n	4.47828e-16	0.448241	0.959	0.593	1.45334e-11	3-1
Tcp1	9.01397e-15	0.44795	0.949	0.416	2.9253e-10	3-1
Snap47	1.4831e-14	0.447482	0.962	0.575	4.8131e-10	3-1
Vbp1	3.18809e-18	0.447177	0.952	0.319	1.03463e-13	3-1
Spop	1.60965e-17	0.446744	0.875	0.292	5.22379e-13	3-1
Cdkn2d	5.47288e-16	0.446456	0.83	0.292	1.77611e-11	3-1
Vps26b	9.39497e-27	0.446054	0.728	0.08	3.04895e-22	3-1
Rab6b	5.04967e-12	0.445909	0.921	0.531	1.63877e-07	3-1
Polr3k	2.86003e-23	0.445813	0.847	0.195	9.28167e-19	3-1
Fam220a	2.51982e-20	0.445795	0.901	0.265	8.17756e-16	3-1
Tbpl1	1.15911e-25	0.445784	0.799	0.142	3.76166e-21	3-1
H2afz	2.93995e-17	0.44563	0.995	0.805	9.54102e-13	3-1
Snrnp27	1.78387e-23	0.445194	0.845	0.186	5.7892e-19	3-1
Mrfap1	2.69814e-14	0.444628	0.969	0.584	8.75627e-10	3-1
Ap1s1	2.68139e-19	0.444426	0.916	0.283	8.7019e-15	3-1
Neurod2	1.63555e-16	0.443444	0.443	0.009	5.30785e-12	3-1
Mab21l2	1.93055e-09	0.443297	0.26	0	6.26523e-05	3-1
Pop7	1.24609e-28	0.442746	0.819	0.115	4.04393e-24	3-1
Tubb4a	1.82465e-16	0.442683	0.926	0.319	5.92153e-12	3-1
Gm11808	1.38615e-23	0.44257	0.646	0.062	4.49848e-19	3-1
Pitx3	1.48299e-06	0.442402	0.196	0.009	0.0481274	3-1
Dcakd	1.57696e-21	0.441789	0.868	0.239	5.1177e-17	3-1
Taldo1	2.59666e-19	0.441244	0.891	0.265	8.42694e-15	3-1
Cyb5a	1.58259e-17	0.44107	0.911	0.327	5.13598e-13	3-1
Nabp2	6.30924e-22	0.440782	0.901	0.265	2.04754e-17	3-1
Vamp2	9.77376e-14	0.44014	0.98	0.743	3.17188e-09	3-1
Snx16	6.08233e-18	0.43982	0.83	0.265	1.9739e-13	3-1
Stoml2	6.63766e-24	0.439621	0.758	0.142	2.15412e-19	3-1
Fbxo9	1.29218e-17	0.439061	0.827	0.283	4.19352e-13	3-1
Apoa1bp	3.98697e-13	0.438606	0.351	0	1.29389e-08	3-1
Rap1b	1.26757e-19	0.438423	0.873	0.248	4.11366e-15	3-1
Psmd8	2.71028e-14	0.438365	0.931	0.407	8.79568e-10	3-1
Rtn1	3.48138e-16	0.43821	1	0.991	1.12981e-11	3-1
Wdr89	9.48512e-20	0.438163	0.677	0.115	3.07821e-15	3-1
Arf2	8.89092e-26	0.437584	0.832	0.15	2.88537e-21	3-1
Clmp	1.61273e-22	0.437574	0.855	0.204	5.2338e-18	3-1
Uncx	1.17916e-25	0.437327	0.794	0.097	3.82674e-21	3-1
Whsc1	1.77715e-12	0.436969	0.336	0	5.7674e-08	3-1
Rbm8a	1.35632e-22	0.435399	0.883	0.221	4.40167e-18	3-1
Uba1	2.67636e-15	0.435132	0.913	0.336	8.68558e-11	3-1
Atp6v1f	5.89126e-18	0.434764	0.964	0.513	1.91189e-13	3-1
Eif3m	7.46198e-21	0.434707	0.87	0.221	2.42164e-16	3-1
Fkbp1b	4.15807e-22	0.43332	0.601	0.053	1.34942e-17	3-1
Rab1a	1.00042e-14	0.432581	0.941	0.381	3.24668e-10	3-1
Immp1l	2.02429e-26	0.430359	0.753	0.097	6.56943e-22	3-1
Commd9	5.88785e-25	0.429764	0.753	0.124	1.91078e-20	3-1
Lamtor5	1.66064e-20	0.429014	0.807	0.204	5.38928e-16	3-1
Mrps18a	6.44047e-20	0.428675	0.827	0.23	2.09013e-15	3-1
Supt4a	9.93077e-22	0.42852	0.868	0.221	3.22283e-17	3-1
Fam19a2	3.41541e-14	0.428482	0.555	0.115	1.1084e-09	3-1
Commd1	9.07092e-22	0.428277	0.814	0.195	2.94378e-17	3-1
Psma4	3.22777e-14	0.427915	0.926	0.381	1.04751e-09	3-1
Trappc1	1.77295e-21	0.427553	0.842	0.204	5.75377e-17	3-1
Shroom2	1.54673e-22	0.427547	0.761	0.142	5.01961e-18	3-1
Bend6	1.2318e-12	0.426213	0.697	0.274	3.99757e-08	3-1
Ube2ql1	8.78883e-16	0.425625	0.707	0.195	2.85224e-11	3-1
Mcts1	4.9558e-18	0.425044	0.888	0.292	1.60831e-13	3-1
Lsm6	7.40079e-24	0.424721	0.903	0.23	2.40178e-19	3-1
Rnf146	3.97647e-26	0.423831	0.723	0.08	1.29048e-21	3-1
Med22	2.21129e-22	0.423795	0.756	0.133	7.17629e-18	3-1
Btbd1	1.06546e-19	0.421904	0.868	0.257	3.45772e-15	3-1
Rbm3	5.06791e-16	0.421335	0.985	0.726	1.64469e-11	3-1
Dusp26	3.61937e-13	0.421093	0.913	0.46	1.17459e-08	3-1
Lypd1	5.98989e-10	0.419428	0.468	0.115	1.9439e-05	3-1
2010107G23Rik	1.57161e-11	0.418932	0.313	0	5.10036e-07	3-1
Lmx1b	3.06189e-25	0.418511	0.621	0.018	9.93675e-21	3-1
Irf2bpl	1.23397e-15	0.418495	0.913	0.31	4.00459e-11	3-1
Sept6	3.1366e-23	0.417998	0.781	0.133	1.01792e-18	3-1
Cdk4	7.08209e-15	0.417449	0.903	0.345	2.29835e-10	3-1
Eif6	2.20043e-21	0.416028	0.847	0.212	7.14106e-17	3-1
Rnf165	3.34413e-19	0.415965	0.802	0.195	1.08527e-14	3-1
Erdr1	5.1127e-11	0.415717	0.3	0	1.65922e-06	3-1
Chmp5	3.47732e-16	0.415431	0.934	0.345	1.12849e-11	3-1
Timm10	7.59723e-21	0.413934	0.771	0.177	2.46553e-16	3-1
Atat1	4.3441e-13	0.41383	0.967	0.451	1.40979e-08	3-1
Nans	4.7792e-26	0.413623	0.682	0.053	1.55099e-21	3-1
Nkiras2	2.55818e-27	0.413611	0.684	0.044	8.30207e-23	3-1
Tpi1	2.54425e-14	0.413474	0.921	0.398	8.25687e-10	3-1
Cwc15	3.0787e-19	0.41206	0.896	0.265	9.99131e-15	3-1
C1qbp	1.26341e-19	0.411355	0.888	0.283	4.10016e-15	3-1
Cxxc5	3.3098e-20	0.411262	0.723	0.124	1.07413e-15	3-1
Cct8	8.57369e-12	0.411243	0.939	0.478	2.78242e-07	3-1
Adh5	7.86923e-20	0.410202	0.771	0.186	2.5538e-15	3-1
Map9	5.45435e-16	0.41009	0.827	0.265	1.7701e-11	3-1
Ywhah	3.86135e-14	0.410078	0.997	0.876	1.25312e-09	3-1
Syndig1l	5.32465e-20	0.409899	0.575	0.053	1.72801e-15	3-1
Mocs2	1.30023e-17	0.409211	0.779	0.23	4.21962e-13	3-1
Pafah1b2	4.87166e-13	0.408775	0.934	0.381	1.581e-08	3-1
Txndc17	3.00782e-16	0.408325	0.885	0.301	9.76127e-12	3-1
Actr1a	2.05818e-20	0.407779	0.924	0.283	6.67941e-16	3-1
Nhp2	5.16898e-24	0.407266	0.751	0.106	1.67749e-19	3-1
Gtf3a	2.69308e-25	0.407051	0.756	0.124	8.73985e-21	3-1
Ppp1r14c	1.68941e-15	0.40696	0.672	0.15	5.48264e-11	3-1
Mrpl27	1.66162e-23	0.405981	0.807	0.168	5.39245e-19	3-1
2410004B18Rik	2.13616e-17	0.40565	0.804	0.23	6.93249e-13	3-1
Rbm17	6.88786e-24	0.404017	0.896	0.212	2.23532e-19	3-1
Nsa2	1.53484e-22	0.403392	0.809	0.195	4.981e-18	3-1
1500011K16Rik	1.83536e-20	0.403354	0.656	0.115	5.95628e-16	3-1
Ptov1	2.9908e-12	0.403143	0.997	0.743	9.70604e-08	3-1
2700029M09Rik	1.57161e-11	0.402264	0.313	0	5.10036e-07	3-1
Hnrnpc	2.3419e-14	0.401641	0.964	0.372	7.60018e-10	3-1
Ap1s2	7.71633e-09	0.40164	0.776	0.327	0.000250418	3-1
Polr2l	3.81754e-24	0.401525	0.807	0.142	1.23891e-19	3-1
Rbm18	1.31243e-22	0.401377	0.842	0.195	4.25925e-18	3-1
Arpc5l	1.5077e-15	0.400955	0.901	0.389	4.89294e-11	3-1
Eif3j1	2.0365e-25	0.400715	0.723	0.088	6.60905e-21	3-1
Paip2	2.26765e-13	0.400693	0.969	0.54	7.3592e-09	3-1
Slc10a4	1.50989e-06	0.400173	0.178	0	0.0490004	3-1
Eif3g	1.6404e-17	0.400008	0.842	0.265	5.3236e-13	3-1
Llph	2.13036e-21	0.399273	0.738	0.168	6.91364e-17	3-1
Tprgl	5.03541e-13	0.398824	0.87	0.389	1.63414e-08	3-1
Nsg1	4.19498e-14	0.398486	1	0.814	1.3614e-09	3-1
Mrpl51	8.30716e-20	0.397581	0.827	0.204	2.69592e-15	3-1
Slmo2	4.72485e-12	0.397208	0.326	0	1.53335e-07	3-1
Bloc1s6	8.70875e-25	0.397002	0.715	0.08	2.82625e-20	3-1
Alyref	3.97481e-19	0.396544	0.738	0.177	1.28994e-14	3-1
Rab33a	1.00757e-26	0.3959	0.692	0.044	3.26985e-22	3-1
Fam136a	5.81813e-22	0.395091	0.735	0.133	1.88816e-17	3-1
Lsm2	7.54067e-26	0.394707	0.748	0.106	2.44717e-21	3-1
Eif3c	1.14187e-16	0.394429	0.906	0.274	3.7057e-12	3-1
Anapc13	4.09311e-19	0.39314	0.824	0.23	1.32834e-14	3-1
Vps4a	3.64356e-25	0.392885	0.768	0.142	1.18245e-20	3-1
Zrsr2	3.33563e-18	0.39243	0.771	0.221	1.08251e-13	3-1
Homer2	2.86813e-17	0.391779	0.644	0.115	9.30793e-13	3-1
March5	3.17716e-21	0.391276	0.88	0.221	1.03108e-16	3-1
Vsnl1	1.18582e-05	0.391171	0.746	0.513	0.384833	3-1
Spin1	9.44935e-16	0.391114	0.891	0.336	3.0666e-11	3-1
Mpnd	3.95305e-19	0.390698	0.85	0.248	1.28288e-14	3-1
Ppp2cb	1.21725e-20	0.390505	0.547	0.035	3.95035e-16	3-1
Wbp1	5.42341e-20	0.39043	0.7	0.133	1.76006e-15	3-1
Fundc2	2.61341e-23	0.390355	0.761	0.133	8.4813e-19	3-1
Wtap	3.5464e-19	0.390033	0.817	0.204	1.15091e-14	3-1
Ubac1	1.19327e-20	0.389762	0.715	0.133	3.87253e-16	3-1
Strap	1.33465e-16	0.389174	0.929	0.354	4.33135e-12	3-1
Actl6b	2.55577e-11	0.388963	0.952	0.46	8.29423e-07	3-1
Plppr1	4.03293e-19	0.388791	0.827	0.195	1.30881e-14	3-1
Mrpl57	2.08145e-20	0.388534	0.799	0.204	6.75492e-16	3-1
Chmp2a	1.09004e-16	0.388233	0.901	0.319	3.53751e-12	3-1
Eloc	4.14696e-06	0.388129	0.514	0.301	0.134581	3-1
Nono	3.0094e-13	0.388009	0.939	0.407	9.76641e-09	3-1
Ubxn1	1.01043e-18	0.38738	0.903	0.265	3.27916e-14	3-1
Wasf1	4.23172e-21	0.387133	0.865	0.221	1.37332e-16	3-1
Sub1	2.10145e-16	0.386959	0.995	0.788	6.81984e-12	3-1
Mrpl23	2.07504e-20	0.386886	0.819	0.204	6.73413e-16	3-1
Cby1	8.46248e-24	0.386541	0.776	0.15	2.74633e-19	3-1
Rwdd1	4.79311e-19	0.386533	0.913	0.301	1.55551e-14	3-1
Mycl	2.8497e-22	0.386496	0.746	0.124	9.24812e-18	3-1
Phyhipl	1.1017e-15	0.386418	0.908	0.327	3.57536e-11	3-1
Pea15a	7.19941e-13	0.386391	0.88	0.381	2.33643e-08	3-1
Napb	8.64122e-11	0.38622	0.774	0.327	2.80433e-06	3-1
Ptp4a3	3.63004e-18	0.385075	0.718	0.159	1.17806e-13	3-1
Itpa	8.45958e-22	0.384915	0.774	0.159	2.74539e-17	3-1
Crcp	1.30727e-24	0.384879	0.733	0.106	4.24249e-20	3-1
Maf1	1.70626e-24	0.384506	0.812	0.142	5.53733e-20	3-1
Commd8	9.38703e-21	0.383415	0.746	0.15	3.04637e-16	3-1
Rab7	4.20373e-13	0.383236	0.941	0.434	1.36424e-08	3-1
Selenom	0.0079431	0.382836	0.517	0.549	1	3-1
Yaf2	3.22702e-16	0.382531	0.807	0.274	1.04726e-11	3-1
Tmem183a	6.07442e-21	0.382013	0.852	0.221	1.97133e-16	3-1
Pgam1	2.03842e-11	0.381682	0.975	0.646	6.61527e-07	3-1
Ube2j2	2.52909e-20	0.381635	0.896	0.265	8.20767e-16	3-1
Zcchc12	1.59608e-07	0.381155	0.975	0.743	0.00517977	3-1
Bzw1	1.59331e-14	0.380494	0.944	0.478	5.17076e-10	3-1
Eri3	1.74365e-15	0.380315	0.908	0.363	5.65867e-11	3-1
Gars	4.30337e-15	0.380221	0.84	0.301	1.39657e-10	3-1
Naa50	3.5228e-23	0.38022	0.743	0.133	1.14325e-18	3-1
Faim	8.34612e-23	0.380058	0.751	0.133	2.70856e-18	3-1
Ppp1r2	4.83894e-17	0.379758	0.873	0.283	1.57038e-12	3-1
Psmb3	1.76022e-11	0.379139	0.954	0.478	5.71245e-07	3-1
Snf8	1.38742e-20	0.378947	0.863	0.204	4.50258e-16	3-1
Atp5o.1	0.000263198	0.378937	0.509	0.389	1	3-1
Aldoa	1.10542e-07	0.378269	0.975	0.805	0.00358743	3-1
Atg3	1.53267e-22	0.378235	0.768	0.159	4.97398e-18	3-1
St8sia2	2.91564e-16	0.377402	0.822	0.239	9.46214e-12	3-1
Fopnl	3.32567e-22	0.377276	0.858	0.212	1.07928e-17	3-1
Pdrg1	1.55549e-16	0.377214	0.883	0.292	5.04802e-12	3-1
Hdgf	1.36613e-15	0.377201	0.919	0.345	4.43351e-11	3-1
Mrps18c	1.23095e-24	0.377195	0.794	0.159	3.99481e-20	3-1
Arpc4	4.48613e-16	0.37706	0.858	0.265	1.45588e-11	3-1
Csdc2	1.33543e-16	0.376923	0.824	0.274	4.33386e-12	3-1
Slc25a11	2.70078e-17	0.37673	0.87	0.274	8.76484e-13	3-1
Tbc1d16	6.6972e-21	0.376605	0.588	0.053	2.17344e-16	3-1
Necab1	4.89917e-14	0.376593	0.458	0.053	1.58993e-09	3-1
Flywch2	2.86983e-19	0.374854	0.756	0.168	9.31346e-15	3-1
Fjx1	2.5213e-16	0.374851	0.616	0.115	8.18238e-12	3-1
Cnbp	5.38991e-15	0.374541	0.962	0.46	1.74919e-10	3-1
Ube2e2	3.96004e-11	0.374422	0.865	0.389	1.28515e-06	3-1
Mpped2	1.70035e-08	0.374211	0.906	0.54	0.000551814	3-1
Ptges3	4.87449e-11	0.37408	0.906	0.434	1.58192e-06	3-1
Srp19	7.43347e-19	0.373577	0.873	0.292	2.41238e-14	3-1
Ufc1	5.45147e-16	0.373502	0.868	0.274	1.76917e-11	3-1
Aprt	3.15546e-14	0.372926	0.809	0.265	1.02404e-09	3-1
Nol7	1.13435e-14	0.372203	0.845	0.283	3.68131e-10	3-1
Rtca	6.33817e-25	0.371803	0.723	0.106	2.05693e-20	3-1
Cacnb3	3.718e-15	0.371712	0.891	0.336	1.2066e-10	3-1
Odc1	1.1248e-21	0.370211	0.73	0.133	3.65032e-17	3-1
Mrpl40	9.76476e-23	0.370067	0.7	0.106	3.16896e-18	3-1
Pfdn2	2.12729e-13	0.369455	0.959	0.611	6.90369e-09	3-1
Eif4a2	2.8835e-10	0.369039	0.995	0.717	9.35781e-06	3-1
Gm9844	8.64411e-14	0.36897	0.366	0	2.80527e-09	3-1
Ppp2ca	2.69505e-11	0.368647	0.962	0.584	8.74625e-07	3-1
Klhl1	6.59449e-20	0.368074	0.751	0.15	2.14011e-15	3-1
Rbmxl1	1.03381e-15	0.368015	0.888	0.319	3.35501e-11	3-1
Sys1	1.80836e-15	0.367883	0.86	0.292	5.86868e-11	3-1
Mrps16	1.09367e-16	0.367536	0.779	0.212	3.54928e-12	3-1
Ndufs3	1.94762e-15	0.367244	0.931	0.345	6.3206e-11	3-1
Lsm5	7.28362e-18	0.366539	0.83	0.221	2.36375e-13	3-1
BC029214	2.04634e-10	0.366287	0.285	0	6.641e-06	3-1
Cox19	1.25943e-19	0.366037	0.855	0.23	4.08722e-15	3-1
R3hdm4	4.95944e-16	0.365971	0.921	0.381	1.60949e-11	3-1
Bud31	5.4455e-20	0.3652	0.835	0.212	1.76723e-15	3-1
Psma5	3.077e-12	0.365191	0.941	0.416	9.9858e-08	3-1
Ap1ar	1.5438e-18	0.365095	0.847	0.239	5.01009e-14	3-1
Arl2bp	1.22988e-14	0.364721	0.906	0.363	3.99132e-10	3-1
Tspan13	7.15711e-08	0.364651	1	0.69	0.0023227	3-1
Arl6	3.57031e-19	0.364115	0.662	0.115	1.15867e-14	3-1
Tsc22d1	3.34945e-11	0.363713	0.995	0.796	1.087e-06	3-1
Deb1	6.45612e-11	0.363406	0.298	0	2.09521e-06	3-1
Zfp637	3.64088e-22	0.363379	0.807	0.186	1.18158e-17	3-1
Zmat2	2.01207e-18	0.363196	0.781	0.204	6.52977e-14	3-1
1810037I17Rik	1.33991e-21	0.363182	0.758	0.142	4.34841e-17	3-1
Nhlh2	9.1185e-12	0.363095	0.728	0.23	2.95923e-07	3-1
Ciapin1	2.31886e-16	0.362692	0.812	0.239	7.52538e-12	3-1
Ptp4a2	9.27798e-16	0.362295	0.875	0.292	3.01098e-11	3-1
Rpl9-ps6	2.27242e-12	0.362224	0.333	0	7.37469e-08	3-1
Med10	8.75203e-20	0.36215	0.827	0.212	2.8403e-15	3-1
Hmox2	5.92691e-23	0.361146	0.756	0.133	1.92346e-18	3-1
1500011B03Rik	8.35813e-12	0.360869	0.934	0.416	2.71246e-07	3-1
Mrpl54	4.77555e-17	0.360702	0.784	0.204	1.54981e-12	3-1
Naa38	1.23543e-19	0.360384	0.72	0.15	4.00934e-15	3-1
Mrpl15	9.45321e-20	0.360143	0.74	0.159	3.06785e-15	3-1
Glrx2	5.59329e-17	0.360075	0.817	0.257	1.81519e-12	3-1
Stard3nl	1.68365e-13	0.360033	0.924	0.354	5.46395e-09	3-1
C77370	5.07185e-10	0.359844	0.275	0	1.64597e-05	3-1
Zc2hc1a	9.6286e-16	0.359515	0.863	0.301	3.12477e-11	3-1
Tmod2	6.33729e-11	0.359195	0.954	0.611	2.05664e-06	3-1
Nt5dc2	3.50558e-12	0.359058	0.514	0.115	1.13766e-07	3-1
Arhgdia	2.0487e-10	0.359049	0.962	0.504	6.64866e-06	3-1
Ret	5.7675e-18	0.358836	0.603	0.088	1.87173e-13	3-1
AI413582	8.71877e-18	0.358561	0.654	0.133	2.8295e-13	3-1
Tsen34	3.81848e-11	0.358536	0.921	0.389	1.23921e-06	3-1
Mapre1	2.89679e-12	0.358392	0.972	0.522	9.40094e-08	3-1
Ttll1	2.36924e-21	0.358315	0.832	0.195	7.6889e-17	3-1
Ppp2r2b	3.3008e-08	0.357604	0.799	0.46	0.00107121	3-1
Phax	4.45362e-17	0.357215	0.858	0.257	1.44533e-12	3-1
Spg21	5.2422e-20	0.357107	0.751	0.15	1.70125e-15	3-1
Prkaca	1.08369e-11	0.356914	0.939	0.434	3.51691e-07	3-1
Mpc2	5.7271e-10	0.356756	0.911	0.46	1.85862e-05	3-1
Gipc1	1.94983e-21	0.356652	0.644	0.088	6.32777e-17	3-1
Gm9493	8.20311e-17	0.356418	0.45	0.009	2.66215e-12	3-1
Uap1	5.51408e-22	0.355059	0.687	0.115	1.78949e-17	3-1
Chst8	8.81227e-19	0.354651	0.672	0.115	2.85985e-14	3-1
Fam177a	9.4734e-14	0.354323	0.455	0.053	3.0744e-09	3-1
Ube2r2	3.75743e-15	0.354254	0.85	0.292	1.2194e-10	3-1
Rgs10	2.85474e-12	0.354148	0.59	0.159	9.26448e-08	3-1
Vps36	1.61245e-20	0.354094	0.651	0.097	5.23287e-16	3-1
Med30	8.96411e-17	0.353973	0.814	0.257	2.90912e-12	3-1
Atp6v1d	6.02173e-12	0.353859	0.934	0.416	1.95423e-07	3-1
Sod2	1.78788e-19	0.353781	0.827	0.23	5.80221e-15	3-1
Zbtb12	7.42964e-18	0.353454	0.489	0.027	2.41114e-13	3-1
1810058I24Rik	9.72831e-21	0.353307	0.72	0.133	3.15713e-16	3-1
Hsd17b10	4.25616e-22	0.352994	0.733	0.133	1.38125e-17	3-1
Pa2g4	1.72637e-19	0.351862	0.845	0.23	5.60259e-15	3-1
Slc25a3	4.11474e-12	0.351784	0.987	0.788	1.33536e-07	3-1
Minos1	2.21422e-12	0.351628	0.964	0.513	7.18582e-08	3-1
Ola1	1.18276e-13	0.351408	0.827	0.292	3.83842e-09	3-1
Gfra4	2.46138e-20	0.351371	0.595	0.053	7.98791e-16	3-1
Txn2	2.90408e-15	0.351215	0.883	0.292	9.42463e-11	3-1
0610010K14Rik	5.33815e-20	0.351133	0.7	0.115	1.73239e-15	3-1
Nanos1	2.30161e-17	0.35083	0.626	0.115	7.46942e-13	3-1
Psmb10	6.77021e-18	0.350754	0.679	0.133	2.19714e-13	3-1
Psmb1	7.90708e-12	0.350509	0.964	0.611	2.56609e-07	3-1
Dmrtb1	3.82019e-08	0.350424	0.242	0.009	0.00123977	3-1
Tmem163	3.62763e-14	0.350396	0.832	0.31	1.17728e-09	3-1
Sptssa	9.40009e-18	0.350206	0.85	0.239	3.05061e-13	3-1
Nr2f1	1.36795e-12	0.34976	0.41	0.035	4.43939e-08	3-1
Hba-a2	1.01727e-06	0.349687	0.183	0	0.0330135	3-1
Chmp1a	2.84062e-17	0.349483	0.83	0.221	9.21866e-13	3-1
Gprin1	5.42473e-22	0.349402	0.682	0.106	1.76049e-17	3-1
Timm17b	1.95975e-17	0.34923	0.832	0.239	6.35998e-13	3-1
Rnps1	1.06487e-18	0.348535	0.911	0.274	3.45582e-14	3-1
Gm561	1.29327e-10	0.348173	0.29	0	4.19705e-06	3-1
Cnr1	3.07952e-15	0.346714	0.672	0.159	9.99396e-11	3-1
Rnf115	2.63722e-20	0.346711	0.779	0.168	8.55856e-16	3-1
Capns1	4.44487e-14	0.346658	0.883	0.283	1.44249e-09	3-1
Lsm14b	4.88336e-24	0.346054	0.697	0.088	1.5848e-19	3-1
Lrrc59	2.34477e-21	0.343929	0.827	0.177	7.60948e-17	3-1
Dnaja2	1.35244e-15	0.343809	0.911	0.31	4.38909e-11	3-1
Vash2	3.66479e-18	0.343735	0.496	0.018	1.18933e-13	3-1
Vapb	1.17358e-14	0.343574	0.832	0.274	3.80863e-10	3-1
Mbd3	1.01608e-13	0.343532	0.875	0.319	3.29748e-09	3-1
Phlda3	9.76739e-17	0.343445	0.555	0.08	3.16981e-12	3-1
Pitpna	2.27957e-12	0.343271	0.819	0.336	7.39788e-08	3-1
Zfp422	7.85311e-18	0.343072	0.628	0.106	2.54857e-13	3-1
Them4	4.29767e-18	0.342688	0.733	0.195	1.39472e-13	3-1
Cetn2	2.065e-23	0.342244	0.636	0.053	6.70155e-19	3-1
Tmem261	1.23804e-11	0.34212	0.316	0	4.0178e-07	3-1
Arl8a	2.02839e-10	0.342114	0.962	0.593	6.58275e-06	3-1
Rsl24d1	3.60453e-21	0.342097	0.779	0.168	1.16978e-16	3-1
Cs	5.61612e-17	0.341924	0.83	0.239	1.8226e-12	3-1
Dctn6	2.2024e-15	0.341512	0.799	0.239	7.14744e-11	3-1
Nudc	1.14173e-13	0.341084	0.916	0.354	3.70526e-09	3-1
Rtf1	6.41745e-15	0.340995	0.896	0.336	2.08266e-10	3-1
Atp6v1g2	6.56068e-07	0.340632	0.702	0.381	0.0212914	3-1
Gstp1	9.71406e-18	0.340005	0.654	0.115	3.1525e-13	3-1
Grpel1	6.28876e-18	0.339651	0.827	0.204	2.04089e-13	3-1
Capza2	8.64099e-11	0.338191	0.931	0.398	2.80426e-06	3-1
Clns1a	2.0527e-18	0.337856	0.819	0.221	6.66163e-14	3-1
Dnajc7	1.25519e-12	0.337585	0.926	0.363	4.07347e-08	3-1
Nudt21	1.15299e-15	0.337484	0.883	0.31	3.74179e-11	3-1
Smim10l1	3.28761e-16	0.337282	0.86	0.265	1.06693e-11	3-1
Atp6v0d1	4.34208e-11	0.337139	0.936	0.469	1.40913e-06	3-1
Lsm3	1.48043e-21	0.336207	0.802	0.177	4.80445e-17	3-1
Gm10116	1.54815e-09	0.336057	0.262	0	5.02422e-05	3-1
Atg12	1.22068e-16	0.336056	0.743	0.195	3.96148e-12	3-1
Calb2	0.00602506	0.334737	0.626	0.451	1	3-1
Dazap1	2.30423e-12	0.334659	0.941	0.407	7.47792e-08	3-1
Sec23a	4.68586e-19	0.334623	0.817	0.204	1.5207e-14	3-1
Mrps25	4.93526e-19	0.334453	0.728	0.15	1.60164e-14	3-1
Stra13	1.24049e-09	0.334387	0.265	0	4.02577e-05	3-1
Commd2	1.30685e-20	0.334386	0.634	0.088	4.2411e-16	3-1
Anapc16	4.21619e-19	0.333996	0.738	0.159	1.36828e-14	3-1
Isoc1	1.36663e-17	0.333757	0.611	0.097	4.43512e-13	3-1
Fam110b	2.70156e-18	0.333553	0.807	0.212	8.76737e-14	3-1
Smim10l2a	3.69895e-20	0.333485	0.611	0.071	1.20042e-15	3-1
Tpd52l1	2.20453e-15	0.33327	0.58	0.115	7.15435e-11	3-1
Apopt1	4.92474e-20	0.332709	0.72	0.133	1.59823e-15	3-1
Ngrn	1.42176e-17	0.332683	0.725	0.177	4.61403e-13	3-1
Shd	1.45723e-15	0.332579	0.809	0.239	4.72915e-11	3-1
Kif5c	2.1508e-09	0.332111	0.985	0.593	6.98001e-05	3-1
Ubl7	2.78033e-21	0.332063	0.667	0.088	9.023e-17	3-1
Pin4	9.40165e-20	0.331678	0.807	0.195	3.05112e-15	3-1
Whsc1l1	2.57082e-10	0.331233	0.282	0	8.34308e-06	3-1
Gm2000	4.27992e-18	0.330683	0.509	0.035	1.38896e-13	3-1
Cebpzos	2.35276e-19	0.330098	0.723	0.15	7.63542e-15	3-1
Naa60	5.57149e-20	0.329438	0.682	0.124	1.80811e-15	3-1
Poldip2	9.56859e-18	0.329406	0.802	0.221	3.1053e-13	3-1
Praf2	1.30149e-16	0.329404	0.824	0.257	4.22372e-12	3-1
Tspyl4	6.821e-09	0.329384	0.858	0.407	0.000221362	3-1
Lnp	5.1127e-11	0.329313	0.3	0	1.65922e-06	3-1
Rfwd2	1.29327e-10	0.329244	0.29	0	4.19705e-06	3-1
Ndufa10	1.39429e-12	0.32905	0.926	0.354	4.52488e-08	3-1
Cisd1	1.09824e-11	0.328338	0.964	0.602	3.56411e-07	3-1
Magoh	3.83827e-21	0.328322	0.807	0.195	1.24563e-16	3-1
Dnajc30	7.06716e-22	0.327798	0.73	0.133	2.29351e-17	3-1
Mapkap1	2.54012e-22	0.327437	0.649	0.071	8.24345e-18	3-1
Ppp2r4	2.04634e-10	0.326863	0.285	0	6.641e-06	3-1
Nfia	6.09169e-09	0.326563	0.361	0.062	0.000197693	3-1
Rab3ip	7.36163e-23	0.326012	0.667	0.062	2.38907e-18	3-1
Deaf1	9.69566e-18	0.325895	0.896	0.319	3.14653e-13	3-1
Fdx1l	1.82943e-10	0.325856	0.298	0.009	5.93706e-06	3-1
Rbm42	4.36922e-17	0.325775	0.802	0.204	1.41794e-12	3-1
Metap2	2.2936e-11	0.325642	0.939	0.442	7.44341e-07	3-1
Cyb5r4	1.5599e-17	0.325507	0.466	0.009	5.06234e-13	3-1
Bcl2l1	4.42411e-20	0.325197	0.753	0.159	1.43576e-15	3-1
Arhgdig	2.93931e-05	0.325196	0.779	0.558	0.953894	3-1
Dpysl5	5.06946e-15	0.324765	0.911	0.327	1.64519e-10	3-1
Bex2	1.29706e-12	0.324691	1	0.92	4.20933e-08	3-1
Gm15800	3.227e-10	0.3245	0.28	0	1.04726e-05	3-1
Aurkaip1	3.87607e-13	0.324033	0.87	0.319	1.2579e-08	3-1
Kctd8	4.05799e-10	0.323339	0.455	0.097	1.31694e-05	3-1
Gsto1	1.56128e-16	0.322984	0.715	0.168	5.06682e-12	3-1
Nudt4	1.44728e-22	0.322662	0.707	0.088	4.69684e-18	3-1
1110059E24Rik	6.79276e-19	0.322473	0.738	0.177	2.20445e-14	3-1
l7Rn6	2.57082e-10	0.322454	0.282	0	8.34308e-06	3-1
Sephs2	3.57628e-21	0.321217	0.692	0.115	1.16061e-16	3-1
Ssb	1.85573e-09	0.32105	0.954	0.451	6.02241e-05	3-1
Pcsk1n	2.34565e-10	0.320865	1	0.965	7.61232e-06	3-1
Jund	7.68261e-09	0.319841	0.992	0.832	0.000249324	3-1
Ccl27a	2.93581e-11	0.31983	0.929	0.451	9.52759e-07	3-1
Tdg	2.33308e-19	0.319793	0.771	0.177	7.57156e-15	3-1
Eid2b	1.60297e-20	0.319066	0.616	0.071	5.20212e-16	3-1
Emd	2.97269e-18	0.317959	0.774	0.212	9.64729e-14	3-1
Mab21l1	8.01149e-17	0.317702	0.468	0.018	2.59997e-12	3-1
Qdpr	6.94146e-15	0.31729	0.677	0.186	2.25271e-10	3-1
Iglon5	8.64397e-17	0.317078	0.753	0.177	2.80523e-12	3-1
mt-Nd1	4.73876e-07	0.317048	1	0.965	0.0153787	3-1
Gng5	1.92432e-14	0.317012	0.723	0.195	6.24501e-10	3-1
Cops5	4.43351e-16	0.31675	0.784	0.239	1.43881e-11	3-1
Mthfd2l	9.30736e-22	0.316733	0.814	0.177	3.02052e-17	3-1
Ppp1r11	1.68218e-15	0.316517	0.913	0.283	5.45918e-11	3-1
Dbi	1.54855e-12	0.315567	0.781	0.257	5.02552e-08	3-1
Phb2	6.17173e-10	0.315501	0.957	0.434	2.00291e-05	3-1
Tshz1	4.95951e-13	0.315353	0.527	0.106	1.60951e-08	3-1
Phpt1	3.51136e-20	0.314765	0.695	0.124	1.13954e-15	3-1
Cuedc2	1.05434e-10	0.314687	0.939	0.434	3.42164e-06	3-1
Dnajc8	2.96251e-14	0.314625	0.888	0.31	9.61424e-10	3-1
Gm8186	3.74511e-19	0.31457	0.57	0.053	1.2154e-14	3-1
Mn1	1.69634e-16	0.314451	0.628	0.115	5.50514e-12	3-1
Ypel1	2.15298e-18	0.314248	0.641	0.097	6.98707e-14	3-1
Mrps23	3.1502e-17	0.313924	0.761	0.195	1.02233e-12	3-1
Bcl11b	5.04868e-14	0.313876	0.499	0.062	1.63845e-09	3-1
Rps27l	5.07474e-17	0.313648	0.779	0.204	1.64691e-12	3-1
Grb2	3.77122e-14	0.313592	0.87	0.292	1.22387e-09	3-1
Rnf2	2.67632e-17	0.313258	0.674	0.142	8.68547e-13	3-1
Abhd17c	8.92036e-21	0.3132	0.705	0.133	2.89492e-16	3-1
Snx6	1.00642e-17	0.312858	0.735	0.186	3.26613e-13	3-1
Bbc3	4.15969e-19	0.312782	0.562	0.044	1.34994e-14	3-1
Elavl3	5.76118e-11	0.31266	0.99	0.708	1.86968e-06	3-1
Golga7b	5.87015e-16	0.312454	0.743	0.204	1.90504e-11	3-1
Ndufaf3	5.59142e-17	0.312263	0.725	0.168	1.81458e-12	3-1
Nova1	1.21631e-11	0.312029	0.845	0.363	3.94729e-07	3-1
Ncl	1.03511e-08	0.311869	0.954	0.513	0.000335925	3-1
Ten1	1.96007e-16	0.311759	0.73	0.186	6.36102e-12	3-1
Fam216a	1.06997e-13	0.311182	0.911	0.354	3.47237e-09	3-1
Dcaf12	7.3415e-21	0.310981	0.623	0.062	2.38254e-16	3-1
Slc6a3	0.000527497	0.31097	0.117	0.009	1	3-1
Hnrnpf	1.36482e-12	0.309812	0.901	0.363	4.42925e-08	3-1
Glra2	1.48525e-11	0.309805	0.664	0.221	4.82007e-07	3-1
Akt1	7.12274e-15	0.309633	0.837	0.248	2.31154e-10	3-1
Eif4e	1.47124e-12	0.309572	0.934	0.389	4.77462e-08	3-1
Nbdy	0.000509829	0.30867	0.511	0.407	1	3-1
Sephs1	3.01806e-19	0.30846	0.595	0.071	9.79451e-15	3-1
Rab12	9.0131e-11	0.308033	0.723	0.283	2.92502e-06	3-1
Ndufaf2	6.53886e-20	0.307836	0.72	0.142	2.12206e-15	3-1
Arf1	4.14702e-09	0.307096	0.985	0.655	0.000134583	3-1
0610007P14Rik	1.24049e-09	0.306903	0.265	0	4.02577e-05	3-1
Rnf10	4.11291e-11	0.306283	0.967	0.434	1.33476e-06	3-1
Stau2	1.0306e-11	0.30618	0.847	0.345	3.34462e-07	3-1
Mapk6	1.05614e-17	0.305983	0.728	0.168	3.42748e-13	3-1
Asnsd1	3.00485e-18	0.30565	0.606	0.088	9.75165e-14	3-1
Tsnax	1.15064e-11	0.305448	0.893	0.345	3.73418e-07	3-1
Cct3	1.02844e-10	0.305212	0.908	0.372	3.33761e-06	3-1
Spag7	1.42633e-18	0.304903	0.845	0.239	4.62888e-14	3-1
Cox20	1.63722e-19	0.303892	0.707	0.115	5.31326e-15	3-1
Tmem55a	4.39631e-20	0.303661	0.697	0.124	1.42673e-15	3-1
Cbr1	3.18622e-12	0.30337	0.88	0.327	1.03402e-07	3-1
Lcmt1	5.4535e-15	0.303362	0.781	0.248	1.76982e-10	3-1
Carkd	1.02681e-10	0.302915	0.293	0	3.3323e-06	3-1
Polr2g	2.42085e-15	0.302906	0.842	0.265	7.85639e-11	3-1
Eif2s3x	2.0515e-18	0.302103	0.814	0.23	6.65774e-14	3-1
Apoo	2.21588e-16	0.302072	0.738	0.186	7.19118e-12	3-1
Echs1	1.49258e-18	0.301397	0.779	0.177	4.84386e-14	3-1
Bcl9	2.33743e-19	0.301288	0.662	0.106	7.58565e-15	3-1
Syce2	2.33981e-16	0.301279	0.478	0.035	7.5934e-12	3-1
Fbxw2	1.08399e-14	0.301252	0.779	0.23	3.51787e-10	3-1
Zmynd19	4.19986e-20	0.301221	0.621	0.08	1.36298e-15	3-1
Rhob	3.94374e-10	0.300889	0.896	0.389	1.27986e-05	3-1
AK010878	1.93055e-09	0.300673	0.26	0	6.26522e-05	3-1
Ralyl	8.16494e-11	0.300624	0.863	0.389	2.64977e-06	3-1
Tacr3	8.75156e-08	0.300566	0.308	0.053	0.00284014	3-1
Coq7	6.51678e-17	0.30039	0.69	0.159	2.11489e-12	3-1
Ccdc32	4.52015e-18	0.300315	0.628	0.124	1.46692e-13	3-1
0610011F06Rik	2.57082e-10	0.300094	0.282	0	8.34308e-06	3-1
Gm10073	4.07756e-12	0.299837	0.372	0.027	1.32329e-07	3-1
Txnrd1	6.03913e-19	0.29964	0.718	0.142	1.95988e-14	3-1
Mrpl49	6.62892e-19	0.299422	0.7	0.142	2.15128e-14	3-1
Ift20	5.18917e-12	0.299374	0.84	0.336	1.68404e-07	3-1
Epha5	2.97556e-06	0.299143	0.827	0.504	0.0965659	3-1
Mturn	2.79999e-17	0.298631	0.682	0.15	9.0868e-13	3-1
1700123O20Rik	2.10925e-19	0.298553	0.674	0.124	6.84515e-15	3-1
Nt5c3	4.21846e-16	0.298506	0.865	0.265	1.36902e-11	3-1
Higd1a	4.97722e-08	0.298332	0.903	0.469	0.00161526	3-1
Lmnb1	1.26421e-14	0.298263	0.532	0.08	4.10276e-10	3-1
Dynlt1c	1.13044e-09	0.298226	0.295	0.018	3.66863e-05	3-1
Ppm1b	1.5379e-17	0.298163	0.718	0.159	4.99096e-13	3-1
Mettl23	1.23621e-15	0.297787	0.659	0.159	4.01189e-11	3-1
Acot7	3.419e-08	0.297674	0.929	0.522	0.00110957	3-1
Sfr1	6.61137e-13	0.297636	0.84	0.301	2.14559e-08	3-1
Ndufaf5	3.76666e-19	0.297592	0.611	0.08	1.22239e-14	3-1
Rnd2	1.27187e-14	0.297566	0.578	0.115	4.12758e-10	3-1
Pdzd11	8.27503e-19	0.297476	0.644	0.106	2.68549e-14	3-1
Elp5	7.79214e-19	0.296496	0.807	0.204	2.52878e-14	3-1
Rab9	7.77591e-19	0.296435	0.712	0.15	2.52352e-14	3-1
Aip	2.94693e-18	0.296403	0.692	0.124	9.56366e-14	3-1
Tmem126a	1.1802e-13	0.296399	0.791	0.248	3.8301e-09	3-1
2610001J05Rik	2.11219e-18	0.296385	0.728	0.159	6.85468e-14	3-1
Mrpl35	2.73117e-19	0.295836	0.672	0.106	8.86346e-15	3-1
B4galt2	3.54724e-15	0.295752	0.751	0.204	1.15118e-10	3-1
Ube2a	6.62474e-21	0.295473	0.776	0.142	2.14993e-16	3-1
Hdgfrp2	1.54815e-09	0.294926	0.262	0	5.02421e-05	3-1
Hbegf	6.80761e-19	0.294601	0.616	0.08	2.20927e-14	3-1
Tmem167	5.81178e-13	0.294185	0.87	0.336	1.8861e-08	3-1
Myl6b	5.29359e-19	0.294158	0.527	0.027	1.71793e-14	3-1
Zwint	4.93464e-08	0.294051	0.982	0.876	0.00160144	3-1
Eif4h	9.41541e-12	0.294009	0.911	0.363	3.05558e-07	3-1
Dok4	5.91506e-22	0.293866	0.621	0.053	1.91961e-17	3-1
Cyc1	7.04726e-08	0.293715	0.947	0.522	0.00228705	3-1
Selm	4.58041e-07	0.293713	0.193	0	0.0148648	3-1
Tgfbr1	8.43449e-13	0.293493	0.529	0.106	2.73725e-08	3-1
Srp9	6.75614e-10	0.292856	0.913	0.442	2.19257e-05	3-1
Gm45768	4.16056e-14	0.292643	0.448	0.035	1.35023e-09	3-1
Txnl1	5.22841e-11	0.292611	0.898	0.372	1.69678e-06	3-1
Pbx4	1.05525e-18	0.292374	0.674	0.124	3.42459e-14	3-1
Pkm	2.62665e-06	0.29234	0.992	0.699	0.0852427	3-1
Ctxn2	5.77721e-11	0.292206	0.628	0.212	1.87488e-06	3-1
Kctd12	2.73636e-06	0.292006	0.417	0.159	0.0888032	3-1
Nudt2	2.4409e-17	0.29187	0.634	0.115	7.92144e-13	3-1
Bad	4.74043e-17	0.291302	0.751	0.186	1.53841e-12	3-1
Mettl22	5.18904e-19	0.291199	0.593	0.08	1.684e-14	3-1
Psmd14	1.5952e-15	0.291032	0.845	0.257	5.17691e-11	3-1
Krt10	2.46664e-19	0.290881	0.628	0.097	8.00499e-15	3-1
Igfbp2	9.45469e-13	0.290811	0.509	0.088	3.06833e-08	3-1
Zcrb1	6.74347e-09	0.290483	0.931	0.487	0.000218846	3-1
Ppil3	3.28203e-21	0.290087	0.562	0.027	1.06512e-16	3-1
Mrpl21	4.07939e-19	0.289863	0.756	0.177	1.32389e-14	3-1
Sem1	0.00134078	0.289742	0.509	0.425	1	3-1
Sh3gl3	6.04076e-14	0.289179	0.753	0.239	1.96041e-09	3-1
Prdm8	7.45269e-10	0.289145	0.308	0.018	2.41862e-05	3-1
Plpp4	1.60015e-17	0.289138	0.501	0.027	5.19296e-13	3-1
Elmo1	6.39534e-08	0.289109	0.684	0.319	0.00207548	3-1
Cir1	1.76839e-18	0.289064	0.684	0.133	5.73897e-14	3-1
Borcs8	5.44584e-18	0.288814	0.695	0.15	1.76734e-13	3-1
Ppp3cb	5.4438e-08	0.288526	0.865	0.407	0.00176668	3-1
Auts2	9.43054e-11	0.288452	0.952	0.442	3.06049e-06	3-1
Stk32b	2.33534e-17	0.288378	0.514	0.035	7.57888e-13	3-1
Tmem29	6.85284e-12	0.287605	0.791	0.301	2.22395e-07	3-1
Rab5a	4.50064e-13	0.287231	0.847	0.31	1.46059e-08	3-1
Dpcd	4.04728e-10	0.286532	0.277	0	1.31346e-05	3-1
Nr2f2	1.04983e-06	0.285925	0.252	0.035	0.03407	3-1
Tceal6	1.09474e-17	0.285754	0.69	0.159	3.55274e-13	3-1
Gatad1	2.2245e-16	0.285237	0.692	0.168	7.21918e-12	3-1
Nt5m	2.80089e-18	0.284889	0.766	0.168	9.08972e-14	3-1
Srm	1.09741e-18	0.284867	0.768	0.186	3.56142e-14	3-1
Commd3	1.18312e-13	0.284611	0.883	0.301	3.83957e-09	3-1
Hgs	5.07185e-10	0.284448	0.275	0	1.64597e-05	3-1
Cep19	3.41781e-20	0.284417	0.664	0.097	1.10918e-15	3-1
Rpl6l	1.24049e-09	0.284331	0.265	0	4.02577e-05	3-1
Cdkn2aipnl	7.06694e-20	0.283899	0.608	0.071	2.29343e-15	3-1
Ube2l3	3.21237e-12	0.283112	0.893	0.363	1.04251e-07	3-1
Ankrd46	4.60087e-15	0.283046	0.835	0.274	1.49312e-10	3-1
1190005I06Rik	1.29744e-18	0.282545	0.552	0.044	4.21058e-14	3-1
Mex3a	1.07871e-17	0.281824	0.634	0.088	3.50075e-13	3-1
Dnajc19	2.22639e-16	0.2815	0.789	0.23	7.22529e-12	3-1
Got2	3.04144e-12	0.281452	0.865	0.31	9.8704e-08	3-1
Cib2	3.776e-14	0.281299	0.621	0.15	1.22543e-09	3-1
Arpp19	9.55105e-11	0.281186	0.921	0.407	3.0996e-06	3-1
Xpa	1.93957e-15	0.280992	0.519	0.071	6.2945e-11	3-1
Rpp14	3.28141e-18	0.280767	0.583	0.071	1.06492e-13	3-1
Nsmce4a	6.02745e-18	0.28049	0.651	0.115	1.95609e-13	3-1
Mrps15	6.17993e-14	0.280461	0.827	0.283	2.00557e-09	3-1
Lrfn4	5.8995e-19	0.280217	0.598	0.071	1.91457e-14	3-1
Clcn4	1.43979e-16	0.280193	0.858	0.239	4.67254e-12	3-1
Pgam5	6.88129e-21	0.279827	0.662	0.088	2.23318e-16	3-1
1810026J23Rik	1.54815e-09	0.279734	0.262	0	5.02422e-05	3-1
4921524J17Rik	8.07395e-19	0.279557	0.659	0.106	2.62024e-14	3-1
Pdxp	0.000569476	0.279517	0.511	0.372	1	3-1
Ufm1	3.37543e-17	0.279208	0.735	0.177	1.09543e-12	3-1
Sdhd	5.02741e-10	0.279186	0.84	0.354	1.63155e-05	3-1
Ncs1	1.25331e-12	0.278904	0.87	0.319	4.06737e-08	3-1
Id2	0.000113624	0.2785	0.387	0.168	1	3-1
D030056L22Rik	1.12641e-19	0.278322	0.73	0.142	3.65553e-15	3-1
Churc1	2.53475e-16	0.278173	0.804	0.212	8.22603e-12	3-1
Krtcap2	8.59584e-11	0.278088	0.934	0.398	2.78961e-06	3-1
Fam168b	8.66975e-14	0.27767	0.832	0.274	2.81359e-09	3-1
Fkbp8	2.85091e-08	0.277346	0.962	0.531	0.000925207	3-1
Rpl27-ps3	4.57622e-15	0.276833	0.461	0.035	1.48512e-10	3-1
Psme3	1.29469e-18	0.276783	0.628	0.088	4.20167e-14	3-1
Chchd4	7.28868e-16	0.276698	0.768	0.212	2.3654e-11	3-1
Prpf19	2.55529e-12	0.276467	0.911	0.327	8.29268e-08	3-1
Glrx5	6.11336e-10	0.27628	0.898	0.425	1.98397e-05	3-1
Zfp771	5.69641e-14	0.27613	0.751	0.23	1.84866e-09	3-1
Cdv3	8.77568e-15	0.27605	0.832	0.274	2.84797e-10	3-1
Lamp5	5.12625e-08	0.275807	0.28	0.035	0.00166362	3-1
Hp1bp3	8.67999e-15	0.275446	0.845	0.265	2.81692e-10	3-1
Mob4	6.70358e-09	0.275384	0.898	0.398	0.000217551	3-1
Mad2l2	3.25653e-15	0.275156	0.567	0.097	1.05684e-10	3-1
Rac1	6.83024e-09	0.274393	0.944	0.416	0.000221662	3-1
Rfxap	1.61075e-11	0.274066	0.702	0.239	5.22735e-07	3-1
Gnas	9.86324e-09	0.273935	1	0.973	0.000320092	3-1
Nipsnap1	4.84428e-15	0.273607	0.84	0.248	1.57211e-10	3-1
Hsp90aa1	6.73514e-09	0.273419	1	0.858	0.000218575	3-1
Ndufb11	3.24976e-10	0.273207	0.957	0.531	1.05464e-05	3-1
Tubb4b	7.79814e-06	0.273106	0.88	0.549	0.253073	3-1
Ndufa11	1.54799e-07	0.272948	0.967	0.619	0.0050237	3-1
Rfk	1.48766e-18	0.272772	0.555	0.053	4.82791e-14	3-1
Dek	2.34405e-19	0.27247	0.72	0.142	7.60715e-15	3-1
Scrn1	1.96122e-11	0.272275	0.847	0.319	6.36476e-07	3-1
Cdc42ep2	1.01563e-18	0.27223	0.539	0.035	3.29602e-14	3-1
Vimp	3.72561e-09	0.272122	0.252	0	0.000120907	3-1
Gadd45gip1	5.47031e-18	0.272051	0.774	0.186	1.77528e-13	3-1
Phf24	8.29585e-15	0.271914	0.682	0.177	2.69225e-10	3-1
Vegfb	1.88143e-13	0.271443	0.677	0.212	6.10581e-09	3-1
N6amt2	3.72561e-09	0.271225	0.252	0	0.000120907	3-1
Egln2	1.59798e-13	0.271109	0.819	0.292	5.18593e-09	3-1
Snrpa1	4.4696e-17	0.270753	0.781	0.195	1.45052e-12	3-1
Lsm8	1.39893e-18	0.270679	0.763	0.159	4.53996e-14	3-1
Zc4h2	1.19873e-14	0.27067	0.43	0.027	3.89022e-10	3-1
Smarca4	2.63964e-11	0.270551	0.888	0.345	8.56643e-07	3-1
Ak6	4.1467e-18	0.27044	0.679	0.124	1.34573e-13	3-1
Azin1	3.04144e-12	0.270252	0.858	0.336	9.87039e-08	3-1
Cacfd1	4.08502e-13	0.270077	0.83	0.283	1.32571e-08	3-1
Rusc2	1.91083e-16	0.269832	0.748	0.195	6.20123e-12	3-1
Lrrc75b	6.17444e-17	0.269718	0.55	0.08	2.00379e-12	3-1
Ufd1l	2.99483e-09	0.269684	0.254	0	9.71912e-05	3-1
Lingo1	3.69664e-09	0.269548	0.888	0.434	0.000119967	3-1
Gtf3c6	9.23444e-17	0.269525	0.527	0.062	2.99685e-12	3-1
Lrrc16b	1.6805e-08	0.269262	0.234	0	0.000545373	3-1
Ccnd2	3.68846e-06	0.269122	0.265	0.053	0.119702	3-1
Snx17	1.80979e-15	0.269039	0.687	0.177	5.87333e-11	3-1
Borcs5	1.52558e-18	0.268945	0.603	0.08	4.95096e-14	3-1
Klhl13	1.40121e-12	0.268507	0.56	0.133	4.54733e-08	3-1
Morn2	1.36802e-19	0.268058	0.644	0.097	4.43965e-15	3-1
Utp11l	4.63103e-09	0.267976	0.249	0	0.000150291	3-1
Tfg	1.03888e-14	0.267256	0.837	0.257	3.37149e-10	3-1
Lancl2	5.66584e-16	0.267227	0.702	0.159	1.83873e-11	3-1
Ddt	1.05833e-15	0.267121	0.585	0.106	3.4346e-11	3-1
Fmc1	7.33135e-06	0.267076	0.509	0.248	0.237924	3-1
Gabarapl1	4.01665e-08	0.266986	0.929	0.504	0.00130353	3-1
Gpr85	1.50774e-12	0.266812	0.883	0.336	4.89308e-08	3-1
Dynlt1a	7.48349e-10	0.266596	0.837	0.381	2.42862e-05	3-1
Orc6	5.26322e-19	0.26629	0.7	0.124	1.70807e-14	3-1
Mrpl13	1.56372e-18	0.265747	0.738	0.168	5.07474e-14	3-1
Eif2s1	2.11034e-17	0.265433	0.715	0.159	6.8487e-13	3-1
Rnf114	6.12906e-16	0.265428	0.578	0.088	1.98906e-11	3-1
Hdhd2	1.37497e-17	0.265269	0.69	0.142	4.4622e-13	3-1
Dfna5	2.99483e-09	0.265195	0.254	0	9.71912e-05	3-1
Bend5	1.91738e-17	0.265107	0.651	0.115	6.22248e-13	3-1
Rpp25l	1.22772e-17	0.264654	0.641	0.124	3.98432e-13	3-1
Rnf182	1.6255e-17	0.264217	0.631	0.097	5.27523e-13	3-1
Exosc9	1.19258e-16	0.264055	0.517	0.053	3.87028e-12	3-1
Ift22	5.54864e-17	0.263613	0.707	0.159	1.8007e-12	3-1
Nkap	2.18498e-17	0.263536	0.679	0.133	7.09092e-13	3-1
RP23-291B1.2	6.83538e-07	0.263069	0.188	0	0.0221829	3-1
Ykt6	7.55881e-18	0.263049	0.672	0.142	2.45306e-13	3-1
March9	7.49974e-14	0.263034	0.733	0.221	2.43389e-09	3-1
Sdr39u1	8.26232e-18	0.262661	0.606	0.097	2.68137e-13	3-1
Mtpn	3.4465e-11	0.262637	0.822	0.31	1.11849e-06	3-1
Spsb3	2.19775e-17	0.261708	0.662	0.142	7.13236e-13	3-1
Tiprl	1.89534e-15	0.261664	0.847	0.274	6.15093e-11	3-1
Vta1	1.59689e-14	0.261505	0.774	0.23	5.18238e-10	3-1
Sap30	1.54851e-10	0.261454	0.326	0.018	5.02538e-06	3-1
Cacng4	3.43337e-12	0.261392	0.88	0.319	1.11423e-07	3-1
Mettl10	2.0776e-08	0.26121	0.232	0	0.000674243	3-1
Ckap4	3.80837e-14	0.261044	0.743	0.204	1.23593e-09	3-1
Ppa2	3.24561e-14	0.260824	0.715	0.212	1.0533e-09	3-1
Nfix	7.46325e-07	0.260529	0.275	0.044	0.0242205	3-1
Nmral1	9.69752e-15	0.260527	0.417	0.018	3.14714e-10	3-1
Zfp575	7.64134e-16	0.260473	0.504	0.053	2.47984e-11	3-1
Eif1ad	2.71202e-19	0.260414	0.662	0.097	8.80132e-15	3-1
H1f0	7.72758e-13	0.260357	0.557	0.124	2.50783e-08	3-1
Akirin1	5.84834e-12	0.259992	0.84	0.31	1.89796e-07	3-1
Epb41l4a	8.24221e-18	0.25985	0.603	0.08	2.67484e-13	3-1
Tusc1	3.37159e-17	0.259556	0.483	0.027	1.09418e-12	3-1
Prr13	1.70182e-15	0.259389	0.728	0.195	5.52291e-11	3-1
Vopp1	9.62292e-18	0.259163	0.728	0.159	3.12293e-13	3-1
Frg1	2.54573e-16	0.258936	0.672	0.15	8.26165e-12	3-1
Fam69b	2.05973e-08	0.258929	0.906	0.442	0.000668445	3-1
Pmm1	9.93449e-10	0.258854	0.758	0.292	3.22404e-05	3-1
Tomm20	1.69059e-08	0.258718	0.98	0.664	0.000548648	3-1
Mrpl50	1.03722e-14	0.258656	0.768	0.23	3.36611e-10	3-1
Zswim6	4.00615e-06	0.258537	0.165	0	0.130012	3-1
Polr2d	2.31973e-18	0.258292	0.695	0.124	7.52821e-14	3-1
Prdx1	2.87585e-06	0.258086	0.865	0.478	0.0933298	3-1
Zscan21	5.08483e-13	0.25752	0.453	0.062	1.65018e-08	3-1
Tmem65	5.69632e-15	0.257359	0.662	0.159	1.84863e-10	3-1
Snrnp25	3.90883e-18	0.25673	0.555	0.053	1.26853e-13	3-1
Trim35	6.03398e-08	0.256661	0.962	0.487	0.00195821	3-1
Cbx5	6.74021e-08	0.256267	0.924	0.442	0.0021874	3-1
Hnrnpa3	7.98885e-08	0.256162	0.977	0.522	0.00259262	3-1
Rtfdc1	8.85269e-09	0.255966	0.242	0	0.000287296	3-1
Rnf208	2.62462e-10	0.255913	0.824	0.345	8.51767e-06	3-1
Ric8	7.13864e-09	0.255701	0.244	0	0.00023167	3-1
Mrpl11	2.11075e-11	0.255641	0.837	0.31	6.85002e-07	3-1
Bpgm	1.02773e-15	0.255496	0.748	0.195	3.3353e-11	3-1
B3gat1	6.3735e-14	0.254444	0.774	0.248	2.06839e-09	3-1
Rad21	2.481e-14	0.254403	0.72	0.186	8.05159e-10	3-1
Mvb12b	3.10667e-14	0.254128	0.824	0.257	1.00821e-09	3-1
Babam1	7.47211e-18	0.253867	0.679	0.124	2.42492e-13	3-1
Gnal	3.95624e-14	0.253533	0.679	0.168	1.28392e-09	3-1
Fam96b	7.66931e-13	0.253528	0.837	0.31	2.48892e-08	3-1
Hacd1	5.56885e-16	0.253417	0.804	0.23	1.80726e-11	3-1
Rras2	2.05975e-16	0.253302	0.478	0.027	6.68452e-12	3-1
Prpf38a	1.46409e-17	0.25299	0.646	0.124	4.7514e-13	3-1
Rpap3	2.23077e-14	0.252755	0.621	0.159	7.23952e-10	3-1
Gar1	1.49555e-17	0.252634	0.506	0.035	4.85352e-13	3-1
Tmem263	2.0021e-18	0.252589	0.677	0.124	6.49743e-14	3-1
Nt5c3b	2.76957e-17	0.252467	0.654	0.133	8.98809e-13	3-1
Borcs7	1.2166e-13	0.252448	0.73	0.23	3.94824e-09	3-1
Psmc5	1.20396e-06	0.252318	0.863	0.442	0.039072	3-1
Znhit3	8.02162e-17	0.252027	0.656	0.124	2.60325e-12	3-1
Alad	2.73e-17	0.251058	0.57	0.071	8.85966e-13	3-1
Cope	1.02101e-09	0.250975	0.878	0.363	3.31348e-05	3-1
Panx1	1.87718e-13	0.250845	0.766	0.239	6.09201e-09	3-1
1110032A03Rik	2.62149e-17	0.25084	0.618	0.115	8.50753e-13	3-1
Eif5	5.896e-09	0.250701	0.972	0.566	0.000191343	3-1
Pomc	1.42797e-49	3.01275	1	1	4.63419e-45	3-2
Snhg11	2.98898e-52	2.03934	0.982	0.954	9.70014e-48	3-2
Kcnq1ot1	7.90717e-50	2.01236	0.965	0.784	2.56611e-45	3-2
Gm47283	1.81892e-46	1.98687	0.947	0.483	5.90296e-42	3-2
Mirg	4.55161e-40	1.68804	0.885	0.494	1.47713e-35	3-2
Xist	3.63848e-16	1.61158	0.726	0.651	1.1808e-11	3-2
Vgf	2.47965e-31	1.54361	0.832	0.562	8.04721e-27	3-2
Gria2	2.97983e-46	1.50142	0.973	0.952	9.67046e-42	3-2
Apoe	1.95281e-25	1.47206	0.735	0.412	6.33745e-21	3-2
AC149090.1	1.94084e-35	1.40615	0.885	0.489	6.2986e-31	3-2
Atp1a1	1.0069e-35	1.37683	0.867	0.656	3.26768e-31	3-2
Meg3	4.88383e-39	1.37617	0.982	0.997	1.58495e-34	3-2
Pde10a	1.285e-17	1.37243	0.717	0.57	4.17021e-13	3-2
Gaa	3.21176e-34	1.36489	0.867	0.705	1.04231e-29	3-2
5330434G04Rik	3.49677e-26	1.32789	0.805	0.598	1.13481e-21	3-2
Gm44644	3.05301e-26	1.27568	0.752	0.435	9.90792e-22	3-2
Baiap3	6.89717e-26	1.2747	0.761	0.473	2.23834e-21	3-2
Atp8a1	2.78062e-32	1.26827	0.832	0.59	9.02393e-28	3-2
Ptprd	3.76205e-29	1.2655	0.894	0.667	1.2209e-24	3-2
A230057D06Rik	2.80275e-26	1.25046	0.699	0.318	9.09578e-22	3-2
Six3	5.53965e-27	1.2476	0.531	0.115	1.79778e-22	3-2
Ptprn	1.53617e-30	1.24494	0.823	0.621	4.98533e-26	3-2
Slc38a2	5.6557e-34	1.23857	0.894	0.804	1.83544e-29	3-2
Gm26917	1.81124e-14	1.21983	0.664	0.519	5.87802e-10	3-2
Itm2c	1.20983e-18	1.19822	0.752	0.761	3.92626e-14	3-2
Ryr2	2.89219e-21	1.19733	0.637	0.308	9.38603e-17	3-2
Tspoap1	1.54828e-22	1.18038	0.708	0.422	5.02463e-18	3-2
Mdga2	5.89884e-26	1.17878	0.788	0.542	1.91435e-21	3-2
Cst3	1.22895e-31	1.15528	0.947	0.949	3.9883e-27	3-2
Carmil3	9.54285e-30	1.15482	0.823	0.501	3.09694e-25	3-2
Gria1	6.78357e-20	1.137	0.699	0.514	2.20147e-15	3-2
Matk	7.40321e-30	1.13413	0.858	0.557	2.40256e-25	3-2
Nav2	4.07046e-19	1.13286	0.743	0.608	1.32099e-14	3-2
Tac2	0.00731296	1.12473	0.265	0.193	1	3-2
Slc6a17	3.94838e-13	1.12002	0.664	0.562	1.28137e-08	3-2
Resp18	2.6724e-20	1.11918	0.929	0.916	8.67274e-16	3-2
Pabpn1	1.76465e-23	1.10683	0.832	0.817	5.72683e-19	3-2
B830012L14Rik	2.74111e-19	1.10198	0.611	0.3	8.89574e-15	3-2
Zbtb20	4.07904e-14	1.09986	0.823	0.761	1.32377e-09	3-2
Efna5	7.38833e-14	1.09937	0.593	0.399	2.39774e-09	3-2
Nktr	2.15176e-23	1.09342	0.841	0.865	6.98311e-19	3-2
Leng8	8.76699e-16	1.08989	0.699	0.567	2.84515e-11	3-2
Luc7l2	3.07025e-26	1.08592	0.903	0.916	9.96388e-22	3-2
Cartpt	7.33645e-19	1.08456	0.301	0.033	2.3809e-14	3-2
Ntrk2	1.95679e-29	1.08029	0.85	0.692	6.35036e-25	3-2
Clu	1.58339e-18	1.07868	0.681	0.478	5.13858e-14	3-2
Tbx3	4.25303e-23	1.07732	0.522	0.142	1.38023e-18	3-2
Gpx3	4.93017e-15	1.07719	0.646	0.486	1.59999e-10	3-2
Gpr101	3.47023e-19	1.07521	0.469	0.137	1.12619e-14	3-2
Unc80	9.01681e-17	1.06334	0.699	0.534	2.92623e-12	3-2
Zcchc7	4.3105e-16	1.05241	0.681	0.514	1.39889e-11	3-2
Eml5	3.91805e-15	1.05098	0.673	0.522	1.27153e-10	3-2
Snrnp70	5.90475e-27	1.04902	0.876	0.891	1.91627e-22	3-2
Slc22a17	4.36858e-38	1.04835	0.965	0.929	1.41774e-33	3-2
Ppp1r9a	1.87006e-12	1.03821	0.681	0.715	6.06889e-08	3-2
Dst	5.32918e-31	1.03567	0.894	0.804	1.72948e-26	3-2
Lsamp	2.17018e-27	1.03245	0.885	0.807	7.04288e-23	3-2
Cacna1e	1.49587e-19	1.02982	0.743	0.58	4.85456e-15	3-2
Isl1	7.26223e-21	1.02822	0.487	0.132	2.35681e-16	3-2
Hspa5	2.39474e-23	1.02601	0.832	0.873	7.77165e-19	3-2
Miat	2.12685e-11	1.02552	0.69	0.684	6.90227e-07	3-2
Gm42418	3.45142e-23	1.02193	0.912	0.7	1.12009e-18	3-2
Gls	1.30236e-27	1.02073	0.85	0.738	4.22655e-23	3-2
Fam135b	1.21874e-14	1.02029	0.558	0.313	3.95518e-10	3-2
Ank2	2.93097e-35	1.01573	0.956	0.939	9.51187e-31	3-2
Cacna1a	7.06018e-27	1.01477	0.85	0.684	2.29124e-22	3-2
Clstn3	1.40899e-18	1.00171	0.761	0.753	4.57259e-14	3-2
Rbm5	1.19142e-21	0.995195	0.858	0.891	3.86651e-17	3-2
Gigyf1	6.85717e-16	0.991767	0.681	0.527	2.22536e-11	3-2
Akap8l	6.86696e-12	0.987614	0.681	0.651	2.22853e-07	3-2
Rims2	6.77568e-13	0.987457	0.628	0.496	2.19891e-08	3-2
Adgrl3	1.82458e-19	0.981892	0.77	0.756	5.92132e-15	3-2
Tro	7.11702e-28	0.97807	0.832	0.7	2.30969e-23	3-2
B230209E15Rik	5.06125e-15	0.977118	0.726	0.509	1.64253e-10	3-2
Nsd3	1.89645e-17	0.976815	0.708	0.506	6.15456e-13	3-2
Dtna	3.7266e-11	0.976596	0.646	0.555	1.20939e-06	3-2
Peg3	1.61604e-23	0.969174	0.92	0.88	5.24453e-19	3-2
Rsrp1	8.21177e-33	0.96863	0.982	0.985	2.66497e-28	3-2
Lrp1b	1.4249e-16	0.965638	0.708	0.573	4.62422e-12	3-2
Scg2	6.38939e-16	0.961533	0.867	0.799	2.07355e-11	3-2
Pfkp	3.77263e-15	0.960329	0.743	0.644	1.22433e-10	3-2
Hsp90b1	2.22062e-22	0.95771	0.841	0.875	7.20658e-18	3-2
Tial1	3.80742e-17	0.95596	0.761	0.687	1.23562e-12	3-2
Camk2a	1.03971e-14	0.952567	0.646	0.486	3.37417e-10	3-2
C230004F18Rik	3.79688e-16	0.951851	0.699	0.494	1.2322e-11	3-2
Ecel1	6.9818e-05	0.948892	0.398	0.313	1	3-2
Grid2	1.49926e-14	0.947269	0.664	0.501	4.86553e-10	3-2
Arglu1	4.46138e-18	0.942554	0.841	0.885	1.44785e-13	3-2
Cacna1b	4.71799e-19	0.942144	0.77	0.7	1.53113e-14	3-2
Birc6	1.09236e-23	0.941105	0.832	0.664	3.54504e-19	3-2
Rnf112	1.75317e-12	0.940776	0.637	0.501	5.68957e-08	3-2
Tanc2	8.28107e-22	0.924998	0.823	0.784	2.68746e-17	3-2
Srek1	1.30711e-14	0.923245	0.726	0.682	4.24197e-10	3-2
Mycbp2	7.80326e-25	0.922688	0.912	0.896	2.53239e-20	3-2
Cers4	1.24799e-17	0.922175	0.77	0.779	4.0501e-13	3-2
Ttc14	1.59043e-16	0.922057	0.761	0.758	5.16141e-12	3-2
Ank3	1.65827e-28	0.920452	0.929	0.949	5.38159e-24	3-2
Ints6	1.51374e-11	0.917398	0.522	0.318	4.91255e-07	3-2
Prlr	7.31447e-21	0.912549	0.46	0.115	2.37377e-16	3-2
Srsf11	1.65032e-20	0.910069	0.885	0.929	5.35578e-16	3-2
Tceal9	1.71507e-16	0.903093	0.726	0.501	5.56592e-12	3-2
Scn2a	9.61834e-21	0.90201	0.796	0.514	3.12144e-16	3-2
Nbea	1.77512e-22	0.900378	0.858	0.812	5.7608e-18	3-2
Fosb	6.35144e-05	0.900377	0.478	0.43	1	3-2
Scn9a	6.14672e-07	0.898501	0.619	0.679	0.0199479	3-2
Malat1	1.35808e-25	0.890279	1	1	4.40738e-21	3-2
Junb	2.36742e-05	0.88965	0.549	0.501	0.768299	3-2
Srrm2	5.41524e-25	0.88863	0.947	0.969	1.75741e-20	3-2
Plagl1	9.5985e-12	0.886783	0.425	0.186	3.115e-07	3-2
Ankrd17	7.73178e-21	0.885778	0.814	0.763	2.5092e-16	3-2
Mkln1	1.78426e-19	0.884278	0.788	0.73	5.79046e-15	3-2
Rasgrf1	2.81372e-12	0.88256	0.531	0.3	9.13136e-08	3-2
Rnf128	4.89038e-11	0.882275	0.407	0.178	1.58708e-06	3-2
Tnrc6a	2.38729e-13	0.878856	0.743	0.804	7.74748e-09	3-2
Adam23	1.64872e-15	0.876565	0.699	0.626	5.35059e-11	3-2
Adgrb3	4.14858e-13	0.872187	0.708	0.702	1.34634e-08	3-2
Ints6l	3.47205e-12	0.870052	0.469	0.232	1.12678e-07	3-2
Ttc19	8.18809e-17	0.8652	0.743	0.679	2.65728e-12	3-2
Zim1	3.56799e-10	0.863994	0.549	0.382	1.15792e-05	3-2
Unc13a	9.36631e-11	0.862563	0.602	0.499	3.03965e-06	3-2
Mbnl2	1.3139e-09	0.862115	0.575	0.471	4.26401e-05	3-2
Faim2	2.62373e-09	0.861463	0.602	0.567	8.51478e-05	3-2
Clk1	3.8266e-13	0.860092	0.726	0.707	1.24185e-08	3-2
Smg1	1.66906e-10	0.857747	0.628	0.534	5.41661e-06	3-2
Arfgef3	4.30764e-09	0.849453	0.646	0.575	0.000139796	3-2
Camk2d	5.97433e-15	0.847934	0.788	0.743	1.93885e-10	3-2
Tnrc6b	1.67672e-12	0.847021	0.708	0.71	5.44146e-08	3-2
Luc7l3	1.77449e-15	0.84676	0.85	0.921	5.75874e-11	3-2
BC005561	1.4319e-10	0.845738	0.628	0.56	4.64693e-06	3-2
Ttc4	4.12551e-06	0.843783	0.584	0.593	0.133885	3-2
Ddx50	3.35038e-13	0.842707	0.681	0.651	1.0873e-08	3-2
R3hdm1	5.81287e-12	0.842154	0.735	0.799	1.88645e-07	3-2
Dbpht2	1.52617e-10	0.841318	0.558	0.382	4.95289e-06	3-2
Uhrf2	2.50957e-06	0.836838	0.593	0.634	0.0814431	3-2
Usp29	5.37757e-18	0.836542	0.805	0.809	1.74518e-13	3-2
Gabra2	7.65002e-09	0.8356	0.611	0.539	0.000248266	3-2
Gm38393	3.47692e-09	0.835322	0.504	0.349	0.000112837	3-2
Nin	0.000590563	0.833753	0.407	0.344	1	3-2
Sst	0.00053527	0.833003	0.15	0.059	1	3-2
Irs4	8.26947e-10	0.832108	0.442	0.239	2.68369e-05	3-2
Sorcs1	1.437e-10	0.829135	0.504	0.305	4.66349e-06	3-2
Tbx3os1	5.10462e-21	0.826583	0.363	0.051	1.6566e-16	3-2
Sgsm2	6.80909e-07	0.824674	0.566	0.555	0.0220976	3-2
Ranbp2	1.39643e-11	0.823816	0.513	0.303	4.53182e-07	3-2
Ube3a	1.07934e-26	0.823127	0.965	0.977	3.50278e-22	3-2
Safb2	1.4704e-06	0.823038	0.522	0.458	0.0477188	3-2
Pnma3	1.24628e-08	0.822196	0.416	0.221	0.000404457	3-2
Rock2	4.37482e-11	0.822127	0.664	0.583	1.41976e-06	3-2
Herc1	1.62344e-20	0.82194	0.814	0.804	5.26855e-16	3-2
Lmtk3	4.58142e-16	0.817922	0.735	0.728	1.48681e-11	3-2
Tnik	1.44037e-14	0.816427	0.761	0.761	4.67445e-10	3-2
Pkd1	2.03882e-07	0.815833	0.513	0.412	0.00661657	3-2
2900055J20Rik	8.14331e-08	0.815642	0.513	0.351	0.00264275	3-2
Atp2b1	3.28786e-15	0.813174	0.814	0.863	1.06701e-10	3-2
Syne1	1.47701e-05	0.813164	0.487	0.433	0.479335	3-2
Fstl5	4.77252e-10	0.806389	0.487	0.29	1.54882e-05	3-2
Hs6st2	3.37093e-06	0.805746	0.531	0.496	0.109397	3-2
2410089E03Rik	2.01149e-07	0.802676	0.593	0.585	0.0065279	3-2
Calb1	2.19239e-08	0.802222	0.496	0.344	0.000711495	3-2
Slc38a1	5.58977e-19	0.801901	0.814	0.873	1.81405e-14	3-2
AI314180	4.58108e-05	0.801792	0.522	0.55	1	3-2
Slc6a6	4.84473e-17	0.798367	0.77	0.748	1.57226e-12	3-2
Zfp445	1.21076e-06	0.79443	0.54	0.499	0.0392929	3-2
Grik2	3.08396e-08	0.794091	0.584	0.481	0.00100084	3-2
Celsr3	6.78748e-08	0.793299	0.549	0.476	0.00220274	3-2
Atxn2l	1.61559e-05	0.790328	0.628	0.751	0.524307	3-2
Asb4	8.11165e-09	0.789539	0.372	0.176	0.000263247	3-2
Cadps	6.49011e-17	0.788618	0.805	0.715	2.10623e-12	3-2
Ache	7.61901e-07	0.787767	0.575	0.565	0.024726	3-2
Tmx4	1.98915e-16	0.78608	0.796	0.883	6.45538e-12	3-2
Dgkh	6.40531e-05	0.786049	0.425	0.336	1	3-2
Tia1	1.77804e-10	0.779958	0.779	0.926	5.77027e-06	3-2
Spata7	1.19972e-05	0.777534	0.549	0.562	0.389346	3-2
Pcdh7	2.74243e-08	0.777471	0.611	0.611	0.000890002	3-2
Csmd2	1.91018e-12	0.77688	0.54	0.318	6.19912e-08	3-2
Pclo	2.68197e-13	0.775879	0.743	0.735	8.7038e-09	3-2
Xpr1	1.46356e-09	0.775181	0.69	0.807	4.7497e-05	3-2
Gramd1a	3.13685e-14	0.774339	0.796	0.855	1.018e-09	3-2
Klhdc8b	6.20563e-09	0.773025	0.619	0.58	0.000201391	3-2
4930447C04Rik	5.3047e-08	0.771838	0.336	0.153	0.00172153	3-2
Rtl5	1.62627e-06	0.771764	0.398	0.257	0.0527774	3-2
Rasgrf2	5.63214e-07	0.771112	0.531	0.448	0.018278	3-2
Cit	2.7301e-08	0.769093	0.637	0.601	0.000886001	3-2
Gabrb1	1.61745e-11	0.768175	0.69	0.606	5.24912e-07	3-2
Zdbf2	4.60564e-14	0.76722	0.752	0.791	1.49467e-09	3-2
Lrpap1	5.15141e-10	0.766937	0.681	0.779	1.67179e-05	3-2
Pcdh11x	0.000392662	0.766128	0.46	0.41	1	3-2
Csmd3	5.20069e-05	0.765615	0.522	0.552	1	3-2
Prune2	3.21676e-06	0.76535	0.487	0.397	0.104393	3-2
Lmna	1.48338e-06	0.763902	0.566	0.573	0.0481401	3-2
Stx3	6.90607e-06	0.763324	0.513	0.471	0.224123	3-2
Dock3	5.02712e-10	0.762906	0.619	0.532	1.63145e-05	3-2
Chd9	3.2753e-07	0.759843	0.611	0.623	0.0106293	3-2
Syt4	5.24061e-16	0.759608	0.894	0.969	1.70074e-11	3-2
Zfhx3	8.59233e-15	0.758419	0.77	0.545	2.78847e-10	3-2
Nrbp2	1.91426e-05	0.755762	0.549	0.557	0.621236	3-2
Nup98	1.42878e-06	0.755736	0.442	0.321	0.0463683	3-2
Ryr3	2.26233e-07	0.752885	0.372	0.206	0.00734194	3-2
Atp13a2	2.81236e-13	0.751737	0.814	0.916	9.12696e-09	3-2
Grk3	2.81544e-08	0.750246	0.407	0.229	0.000913694	3-2
Caly	8.47311e-12	0.74998	0.894	0.934	2.74978e-07	3-2
Lrfn5	8.61034e-06	0.748872	0.619	0.667	0.279431	3-2
C130073E24Rik	7.98004e-07	0.748659	0.434	0.298	0.0258976	3-2
Pnisr	5.06646e-11	0.748054	0.779	0.911	1.64422e-06	3-2
Fus	3.13006e-16	0.747199	0.885	0.972	1.0158e-11	3-2
Npy	1.79024e-07	0.747175	0.31	0.127	0.00580986	3-2
Hap1	1.92853e-22	0.746875	0.965	0.873	6.25865e-18	3-2
Trrap	1.26847e-10	0.746434	0.637	0.578	4.11658e-06	3-2
Madd	3.11032e-09	0.745921	0.646	0.631	0.000100939	3-2
Aifm3	7.43521e-10	0.745801	0.442	0.234	2.41295e-05	3-2
C1qb	1.68252e-08	0.742602	0.336	0.142	0.000546028	3-2
Unc5d	7.11269e-08	0.740529	0.54	0.445	0.00230828	3-2
Mga	4.06643e-07	0.740457	0.566	0.509	0.0131968	3-2
Usp48	3.91534e-06	0.733782	0.504	0.445	0.127064	3-2
Clasp1	1.1625e-11	0.733658	0.708	0.71	3.77266e-07	3-2
Rapgef6	1.71616e-08	0.732435	0.602	0.57	0.000556946	3-2
Wnk1	3.77211e-10	0.732352	0.673	0.69	1.22416e-05	3-2
Gpi1	4.07678e-16	0.731287	0.858	0.891	1.32304e-11	3-2
Pnmal1	1.35026e-06	0.730956	0.619	0.707	0.04382	3-2
Dpp6	8.65476e-15	0.730591	0.779	0.814	2.80873e-10	3-2
Stat3	1.72967e-06	0.729302	0.425	0.293	0.0561329	3-2
Slc25a36	0.000385498	0.727584	0.531	0.603	1	3-2
Ptprm	4.53663e-09	0.726252	0.372	0.17	0.000147227	3-2
Cd81	7.94777e-12	0.725932	0.814	0.964	2.57929e-07	3-2
Trank1	0.000447087	0.724902	0.478	0.483	1	3-2
Snrnp48	0.000180152	0.72462	0.487	0.471	1	3-2
Gabrg3	2.08991e-06	0.723702	0.522	0.471	0.067824	3-2
Igsf9b	5.0017e-10	0.722271	0.593	0.466	1.6232e-05	3-2
Guf1	0.000311517	0.72214	0.531	0.593	1	3-2
Chd6	3.26189e-06	0.720846	0.584	0.628	0.105858	3-2
Magi1	6.21624e-12	0.719951	0.788	0.835	2.01736e-07	3-2
Slc4a3	5.76004e-07	0.719742	0.628	0.662	0.018693	3-2
Dmd	1.198e-07	0.719522	0.478	0.331	0.00388788	3-2
Abcc5	1.17764e-08	0.719283	0.655	0.664	0.000382178	3-2
Fam46a	0.00549321	0.718185	0.336	0.28	1	3-2
Amy1	3.8655e-07	0.717628	0.345	0.178	0.0125447	3-2
Fkbp2	5.83781e-13	0.717465	0.779	0.779	1.89454e-08	3-2
Snhg20	0.00102686	0.717301	0.513	0.585	1	3-2
Trio	9.26581e-10	0.716629	0.664	0.712	3.00703e-05	3-2
Kmt2a	2.97037e-05	0.715423	0.628	0.712	0.963973	3-2
Kalrn	2.49747e-05	0.715036	0.575	0.618	0.810505	3-2
Bptf	2.26716e-08	0.7142	0.69	0.799	0.00073576	3-2
Ppfia4	6.20396e-06	0.712889	0.522	0.473	0.201337	3-2
Pitpnm1	5.36858e-08	0.711725	0.602	0.573	0.00174226	3-2
Ubr5	2.74179e-08	0.710725	0.602	0.547	0.000889792	3-2
Sptbn4	8.37212e-06	0.710149	0.451	0.361	0.2717	3-2
Dennd1b	1.2195e-06	0.709832	0.451	0.328	0.0395763	3-2
Vwa5b2	0.00200606	0.709046	0.469	0.486	1	3-2
Prpf39	2.87026e-05	0.708962	0.46	0.392	0.931485	3-2
Rrad	6.00141e-09	0.708774	0.389	0.183	0.000194764	3-2
Bicd1	0.00201199	0.708188	0.566	0.692	1	3-2
Trip12	3.29256e-08	0.708012	0.628	0.641	0.00106854	3-2
Car10	2.072e-09	0.706903	0.673	0.608	6.72427e-05	3-2
Ctsd	2.07832e-05	0.703123	0.619	0.771	0.674478	3-2
Clcn3	1.45937e-13	0.702157	0.735	0.771	4.73609e-09	3-2
Dlg4	1.64198e-16	0.701629	0.814	0.758	5.32871e-12	3-2
Ptprz1	0.000270815	0.701507	0.504	0.517	1	3-2
Myo9a	1.64115e-06	0.701139	0.593	0.618	0.0532601	3-2
Atp6v0b	4.21799e-26	0.70086	0.973	0.99	1.36886e-21	3-2
Lgmn	4.59587e-06	0.699926	0.593	0.659	0.14915	3-2
Srrm1	2.0907e-11	0.697645	0.761	0.88	6.78495e-07	3-2
Mapk8ip3	0.00279798	0.696719	0.522	0.626	1	3-2
Phf20l1	9.93744e-05	0.696429	0.513	0.504	1	3-2
Cpt1c	3.97316e-08	0.696122	0.522	0.405	0.00128941	3-2
Chd4	1.4391e-09	0.694058	0.69	0.804	4.67032e-05	3-2
Sfswap	2.82688e-05	0.693532	0.593	0.664	0.917408	3-2
Vstm2l	5.69197e-08	0.692705	0.513	0.364	0.00184722	3-2
Nfasc	1.38335e-09	0.692051	0.664	0.684	4.48938e-05	3-2
Tnrc6c	6.64312e-11	0.690362	0.779	0.873	2.15589e-06	3-2
Zzef1	9.0137e-06	0.689689	0.504	0.45	0.292522	3-2
Begain	0.0023358	0.688005	0.451	0.463	1	3-2
Ubn2	6.36284e-09	0.687827	0.69	0.771	0.000206493	3-2
Nrcam	1.77598e-06	0.686699	0.602	0.672	0.0576359	3-2
Sgsm1	9.2515e-07	0.686588	0.496	0.41	0.0300239	3-2
Nalcn	4.71913e-08	0.686462	0.566	0.517	0.0015315	3-2
Zranb2	3.79919e-10	0.686044	0.743	0.868	1.23295e-05	3-2
Grin2b	8.68387e-12	0.685677	0.735	0.768	2.81818e-07	3-2
Nrsn2	1.39364e-05	0.68497	0.584	0.667	0.452277	3-2
Nufip2	5.23344e-07	0.684917	0.566	0.519	0.0169841	3-2
Ampd2	0.0018668	0.684387	0.46	0.481	1	3-2
Abca2	2.02284e-05	0.683667	0.504	0.481	0.656471	3-2
Col25a1	6.70376e-05	0.683434	0.301	0.173	1	3-2
Nop56	1.07474e-13	0.683382	0.761	0.845	3.48784e-09	3-2
Ccnl2	0.000290713	0.682892	0.611	0.784	1	3-2
mt-Co2	9.61608e-29	0.68277	1	1	3.12071e-24	3-2
Usp7	3.17582e-05	0.682371	0.575	0.628	1	3-2
Ago2	2.75356e-07	0.681942	0.611	0.639	0.00893613	3-2
Grin1	2.80653e-09	0.67989	0.655	0.618	9.10803e-05	3-2
Gabrg1	1.98813e-05	0.67983	0.354	0.229	0.645208	3-2
Ptpro	0.000408167	0.679803	0.54	0.634	1	3-2
Tspyl2	8.0721e-08	0.679646	0.549	0.471	0.00261964	3-2
Ntrk3	4.25349e-06	0.678595	0.602	0.593	0.138038	3-2
Tmem214	1.16641e-05	0.678582	0.513	0.463	0.378535	3-2
Yeats2	1.00312e-06	0.677821	0.487	0.392	0.0325542	3-2
Cpne7	0.0017968	0.676107	0.425	0.394	1	3-2
Scn8a	4.22225e-07	0.674897	0.575	0.524	0.0137025	3-2
C1qc	6.72363e-07	0.674576	0.274	0.112	0.0218202	3-2
Huwe1	9.42216e-11	0.674384	0.743	0.837	3.05777e-06	3-2
Oprl1	4.75041e-05	0.673965	0.593	0.684	1	3-2
Hexb	0.00781225	0.673569	0.354	0.323	1	3-2
Ctsl	1.55041e-05	0.672665	0.628	0.756	0.503154	3-2
Atp11b	2.87473e-06	0.67212	0.549	0.537	0.0932935	3-2
Atp2a2	5.09073e-15	0.670853	0.823	0.802	1.65209e-10	3-2
Bscl2	2.55639e-08	0.668828	0.646	0.702	0.000829624	3-2
Aak1	0.000249051	0.668611	0.549	0.618	1	3-2
Opcml	8.99672e-06	0.668596	0.681	0.695	0.291971	3-2
Dus3l	4.48953e-05	0.668216	0.558	0.58	1	3-2
Zdhhc8	2.52324e-05	0.667198	0.496	0.45	0.818867	3-2
Fry	3.86632e-10	0.666827	0.726	0.774	1.25474e-05	3-2
B4gat1	3.4608e-08	0.665749	0.637	0.715	0.00112313	3-2
Rbm26	2.69007e-07	0.665112	0.602	0.613	0.00873009	3-2
Nptx2	5.12892e-06	0.664469	0.354	0.216	0.166449	3-2
Rpn1	4.12111e-05	0.661847	0.593	0.746	1	3-2
Prrc2c	3.27613e-08	0.66079	0.69	0.819	0.0010632	3-2
Tm9sf4	8.45781e-07	0.660511	0.575	0.58	0.0274481	3-2
Ago3	6.68536e-06	0.659483	0.389	0.26	0.21696	3-2
Afdn	9.56637e-06	0.659343	0.496	0.44	0.310457	3-2
Grm5	3.17397e-07	0.656811	0.602	0.565	0.0103005	3-2
Psap	2.09672e-13	0.656791	0.894	0.969	6.8045e-09	3-2
Dot1l	0.000815341	0.656009	0.451	0.438	1	3-2
Tsc1	2.98633e-05	0.655448	0.549	0.578	0.969153	3-2
Plec	0.00021529	0.654061	0.416	0.349	1	3-2
Kdm2a	0.00482585	0.653478	0.504	0.57	1	3-2
Gria4	4.76775e-06	0.652861	0.558	0.527	0.154728	3-2
Sema4a	1.19704e-05	0.650794	0.46	0.377	0.388474	3-2
Mbd5	0.0007594	0.650222	0.434	0.402	1	3-2
Plekhn1	2.13036e-05	0.648825	0.381	0.27	0.691365	3-2
Mau2	0.000185221	0.648642	0.54	0.601	1	3-2
A230006K03Rik	3.42674e-07	0.647569	0.398	0.239	0.0111208	3-2
Kmt2c	0.000297077	0.645058	0.513	0.56	1	3-2
Alcam	3.3611e-05	0.643346	0.69	0.753	1	3-2
Krit1	4.22116e-07	0.641858	0.673	0.758	0.0136989	3-2
Grb10	0.000516741	0.64091	0.487	0.499	1	3-2
Rgs11	1.20523e-05	0.640724	0.363	0.232	0.391133	3-2
Bin1	9.22265e-08	0.640476	0.708	0.84	0.00299303	3-2
Aebp2	0.000612681	0.640005	0.451	0.43	1	3-2
Phf3	1.52245e-05	0.63975	0.593	0.672	0.494082	3-2
Magel2	8.56046e-05	0.639618	0.496	0.468	1	3-2
Gm44643	3.9979e-06	0.639516	0.381	0.242	0.129744	3-2
Scn1a	0.000662058	0.638432	0.434	0.41	1	3-2
Adamts10	5.67031e-05	0.637867	0.381	0.267	1	3-2
Slc5a3	0.002006	0.637106	0.46	0.481	1	3-2
Htt	2.12712e-05	0.635821	0.496	0.468	0.690315	3-2
Atp11a	1.9198e-05	0.635354	0.442	0.354	0.623033	3-2
Msi2	5.131e-07	0.635159	0.646	0.73	0.0166517	3-2
Lrp1	2.31204e-07	0.63454	0.628	0.687	0.00750326	3-2
Fam173a	1.92198e-05	0.634186	0.611	0.712	0.623741	3-2
Mbtd1	0.000162555	0.632447	0.504	0.504	1	3-2
Rbm39	1.55449e-15	0.632432	0.912	0.995	5.04479e-11	3-2
Pnn	4.35945e-07	0.632129	0.69	0.863	0.0141477	3-2
Dvl1	9.54419e-05	0.630768	0.522	0.532	1	3-2
Odf2	2.77542e-05	0.629889	0.54	0.545	0.900706	3-2
AC160336.1	3.20267e-05	0.629277	0.504	0.402	1	3-2
Atp1b1	3.44611e-12	0.628906	0.912	0.926	1.11836e-07	3-2
Lrrc45	0.00440513	0.628328	0.398	0.364	1	3-2
Ralgapa1	1.58485e-06	0.62779	0.584	0.573	0.0514331	3-2
Taz	0.000290769	0.626126	0.478	0.458	1	3-2
Pld3	0.00212465	0.625023	0.566	0.763	1	3-2
B230334C09Rik	8.15479e-06	0.622082	0.575	0.613	0.264647	3-2
Syt11	6.54876e-13	0.622074	0.841	0.903	2.12527e-08	3-2
Cdc42bpa	8.13801e-05	0.621056	0.584	0.664	1	3-2
Foxn3	0.000358109	0.620544	0.575	0.651	1	3-2
Rgs9	0.00223889	0.620358	0.451	0.453	1	3-2
Pcdh9	3.03905e-05	0.620319	0.496	0.402	0.986262	3-2
Dopey1	0.00150292	0.619346	0.478	0.496	1	3-2
mt-Nd2	8.91744e-23	0.6192	0.991	1	2.89398e-18	3-2
Sgip1	2.39449e-07	0.618441	0.708	0.804	0.00777082	3-2
Chd8	0.000730467	0.61768	0.522	0.562	1	3-2
Macf1	9.31698e-11	0.61692	0.779	0.911	3.02364e-06	3-2
Ylpm1	5.5926e-05	0.616659	0.575	0.621	1	3-2
Kif1b	1.04535e-13	0.616409	0.832	0.931	3.39248e-09	3-2
Dennd1a	0.000781781	0.615861	0.442	0.427	1	3-2
Grin2a	0.000195193	0.615463	0.398	0.31	1	3-2
Tenm1	2.07949e-05	0.614165	0.646	0.646	0.674858	3-2
Rictor	0.00304503	0.613114	0.381	0.349	1	3-2
Syp	8.31258e-07	0.612839	0.779	0.916	0.0269768	3-2
Mmp16	0.000431328	0.611552	0.478	0.455	1	3-2
Spock1	0.000492005	0.610692	0.425	0.366	1	3-2
Dgkg	5.98961e-05	0.608847	0.354	0.239	1	3-2
Frmd4a	1.86704e-07	0.608096	0.681	0.791	0.0060591	3-2
Washc2	1.96047e-05	0.60753	0.451	0.379	0.636232	3-2
Enah	1.63518e-06	0.605943	0.735	0.913	0.0530665	3-2
Lnpk	0.00129378	0.605427	0.478	0.468	1	3-2
Sparc	0.000915072	0.605347	0.248	0.148	1	3-2
Izumo4	0.000549142	0.605272	0.389	0.331	1	3-2
4932438A13Rik	4.96218e-06	0.604649	0.593	0.59	0.161038	3-2
Adam22	4.121e-05	0.604283	0.54	0.583	1	3-2
Btbd7	0.000116031	0.604151	0.398	0.31	1	3-2
Ncam2	0.000148446	0.603721	0.522	0.499	1	3-2
Calr	4.98654e-13	0.603186	0.876	0.975	1.61828e-08	3-2
Gprasp2	3.02931e-12	0.60314	0.788	0.835	9.83101e-08	3-2
Snx14	1.76387e-05	0.601423	0.442	0.351	0.572429	3-2
Sptan1	5.52301e-12	0.600802	0.77	0.84	1.79238e-07	3-2
Ccnt2	0.000941232	0.599415	0.584	0.71	1	3-2
Tmem179	0.000729101	0.597908	0.575	0.756	1	3-2
Map7	0.000162838	0.59446	0.354	0.249	1	3-2
Dync2h1	0.0067113	0.593933	0.398	0.394	1	3-2
Saraf	3.83501e-11	0.593323	0.761	0.926	1.24457e-06	3-2
Cop1	0.008101	0.593258	0.442	0.45	1	3-2
Sorbs1	0.00146979	0.593063	0.345	0.272	1	3-2
Pi4ka	0.00369431	0.592322	0.469	0.499	1	3-2
Tmem145	0.00017449	0.592243	0.619	0.753	1	3-2
Mbp	0.00837533	0.592014	0.221	0.45	1	3-2
Nbeal1	0.000138757	0.591882	0.496	0.481	1	3-2
Hook1	0.00822537	0.591645	0.513	0.608	1	3-2
Bclaf1	5.65842e-08	0.590841	0.717	0.842	0.00183633	3-2
Plppr4	5.8306e-10	0.590638	0.788	0.687	1.89221e-05	3-2
Tmem191c	3.52305e-06	0.58957	0.655	0.679	0.114333	3-2
Ppp1r10	0.00901333	0.589242	0.487	0.542	1	3-2
Klhl7	2.46486e-05	0.588182	0.619	0.807	0.799921	3-2
Lmbrd1	4.8729e-05	0.587965	0.54	0.573	1	3-2
Mical2	4.66312e-05	0.585621	0.31	0.183	1	3-2
Pnck	2.91418e-09	0.585502	0.717	0.847	9.4574e-05	3-2
Eif4g1	3.07573e-10	0.584807	0.717	0.814	9.98165e-06	3-2
Sf3b1	9.6387e-13	0.584504	0.796	0.924	3.12805e-08	3-2
Nptn	8.66799e-12	0.583584	0.841	0.919	2.81302e-07	3-2
Nav1	6.97291e-13	0.583572	0.876	0.934	2.26292e-08	3-2
Rbm28	0.00141381	0.581321	0.478	0.486	1	3-2
Tob2	0.00202366	0.581037	0.292	0.209	1	3-2
Gabre	4.64427e-17	0.58	0.327	0.056	1.5072e-12	3-2
Crocc	3.73371e-10	0.579793	0.336	0.12	1.2117e-05	3-2
Sirpa	9.1381e-05	0.579645	0.513	0.524	1	3-2
Anks3	0.000148155	0.579518	0.451	0.402	1	3-2
Prpf4b	0.00038348	0.578432	0.558	0.654	1	3-2
Itpr1	1.4326e-13	0.577951	0.301	0.064	4.64923e-09	3-2
Cnot10	0.000221302	0.57771	0.434	0.366	1	3-2
Cds2	2.53157e-07	0.577416	0.646	0.692	0.00821569	3-2
Maged1	4.7473e-16	0.576635	0.938	0.992	1.54064e-11	3-2
Plpbp	0.000146312	0.576366	0.398	0.316	1	3-2
Edil3	0.000992068	0.575576	0.575	0.69	1	3-2
Man2b1	2.78761e-05	0.575572	0.283	0.15	0.904663	3-2
Ptprs	2.51727e-14	0.575032	0.876	0.941	8.16929e-10	3-2
Ttc13	0.000231391	0.574084	0.522	0.545	1	3-2
Tet2	0.00560586	0.573822	0.336	0.288	1	3-2
Pdia6	6.28297e-05	0.571257	0.628	0.827	1	3-2
Prnp	2.50019e-08	0.570918	0.717	0.858	0.000811388	3-2
Nrxn3	6.72954e-10	0.57066	0.761	0.679	2.18394e-05	3-2
Arhgap17	2.24477e-05	0.570443	0.292	0.155	0.728496	3-2
Hdac7	0.00126931	0.570018	0.46	0.453	1	3-2
Grik5	2.89584e-10	0.568581	0.735	0.819	9.39788e-06	3-2
Mdn1	0.00655433	0.566862	0.381	0.354	1	3-2
Chd2	0.00863831	0.565577	0.451	0.489	1	3-2
Pou2f2	1.60598e-06	0.565006	0.646	0.631	0.052119	3-2
Mgat4c	0.00387058	0.564983	0.389	0.346	1	3-2
Myo9b	0.00267296	0.564565	0.31	0.239	1	3-2
Speg	0.000993797	0.563969	0.372	0.308	1	3-2
Il1rapl1	9.4283e-05	0.563723	0.372	0.27	1	3-2
Slf2	0.00115292	0.563045	0.398	0.346	1	3-2
Flnb	0.000191689	0.562148	0.31	0.201	1	3-2
Sox2	6.19097e-09	0.561763	0.292	0.097	0.000200916	3-2
Npy1r	3.5406e-17	0.560828	0.336	0.059	1.14903e-12	3-2
Sun1	0.000607385	0.560692	0.416	0.361	1	3-2
Clasrp	0.000135721	0.560608	0.496	0.476	1	3-2
Ktn1	5.57148e-07	0.560593	0.655	0.756	0.0180811	3-2
Slc12a5	1.23324e-08	0.560189	0.761	0.682	0.000400225	3-2
Brinp1	7.62863e-05	0.559872	0.531	0.56	1	3-2
Vezt	6.56718e-05	0.559097	0.602	0.697	1	3-2
Sparcl1	0.000321502	0.558824	0.363	0.262	1	3-2
C1qa	1.51667e-05	0.558247	0.212	0.081	0.492206	3-2
Flna	0.003513	0.557998	0.363	0.308	1	3-2
Adgrb1	0.00151947	0.557604	0.584	0.669	1	3-2
Atp2c1	0.000275676	0.5567	0.69	0.799	1	3-2
Pxdn	0.00271272	0.556214	0.398	0.351	1	3-2
Tmem63b	3.60573e-08	0.554769	0.69	0.822	0.00117017	3-2
Scg5	2.30977e-07	0.554724	0.761	0.952	0.0074959	3-2
Lpp	1.79149e-05	0.554522	0.239	0.104	0.581391	3-2
Gcn1l1	0.00388754	0.554485	0.496	0.565	1	3-2
Atp6v0a1	4.34634e-10	0.5543	0.735	0.799	1.41052e-05	3-2
Usp9x	1.14568e-08	0.554013	0.717	0.824	0.000371806	3-2
Per3	3.29402e-05	0.552701	0.327	0.198	1	3-2
Dock10	8.84835e-07	0.551401	0.274	0.115	0.0287156	3-2
Lncpint	1.87954e-09	0.551164	0.31	0.109	6.09968e-05	3-2
Tecr	4.47122e-16	0.550868	0.991	0.995	1.45104e-11	3-2
mt-Atp6	2.71868e-23	0.549782	1	1	8.82293e-19	3-2
Serinc1	1.20185e-07	0.549063	0.814	0.969	0.00390038	3-2
Reep2	3.84285e-07	0.547935	0.637	0.743	0.0124712	3-2
Ino80	0.0012822	0.547287	0.345	0.265	1	3-2
Itm2b	1.85074e-06	0.546133	0.823	0.98	0.0600622	3-2
Zmynd11	5.53127e-06	0.545916	0.681	0.842	0.179506	3-2
Ppp6r3	0.00571867	0.545908	0.434	0.448	1	3-2
Srsf10	0.000507744	0.545006	0.628	0.832	1	3-2
Ddx17	8.61181e-05	0.544729	0.646	0.784	1	3-2
Zfp638	1.48163e-05	0.544187	0.602	0.707	0.480835	3-2
4930402H24Rik	0.00167181	0.543943	0.619	0.804	1	3-2
Clcn5	0.00319844	0.542935	0.416	0.402	1	3-2
Canx	1.33628e-07	0.542747	0.726	0.896	0.00433663	3-2
Dmxl1	0.00775227	0.540749	0.425	0.43	1	3-2
Glg1	0.000151858	0.539699	0.549	0.646	1	3-2
Plekha7	0.0048095	0.539364	0.372	0.336	1	3-2
Mboat7	0.000168767	0.539226	0.566	0.697	1	3-2
Nfat5	0.00873497	0.538592	0.442	0.461	1	3-2
Chga	0.00441888	0.538226	0.611	0.827	1	3-2
Rnpepl1	0.00826399	0.538122	0.407	0.397	1	3-2
Ash1l	5.84113e-05	0.537772	0.637	0.738	1	3-2
Uba6	0.0093837	0.537518	0.407	0.402	1	3-2
Cacna2d1	0.000135088	0.537384	0.717	0.784	1	3-2
Aff4	0.000241031	0.53422	0.611	0.761	1	3-2
Gem	7.08062e-06	0.534014	0.274	0.127	0.229787	3-2
Cox6a2	5.40578e-15	0.53371	0.23	0.023	1.75434e-10	3-2
Pcdhgc4	0.000134397	0.531457	0.327	0.219	1	3-2
Tmc4	0.000261586	0.531013	0.248	0.135	1	3-2
Fam155a	0.00026682	0.53064	0.628	0.781	1	3-2
Tspan7	0.00387146	0.53053	0.655	0.868	1	3-2
Stxbp5l	0.000917709	0.530028	0.345	0.265	1	3-2
Usp15	0.00085793	0.528399	0.531	0.557	1	3-2
Dlst	0.000157454	0.526891	0.566	0.641	1	3-2
Sf3b3	0.00434887	0.525984	0.478	0.532	1	3-2
Dzip3	9.34093e-06	0.525733	0.646	0.771	0.303141	3-2
Nrxn1	8.88068e-12	0.525499	0.858	0.921	2.88205e-07	3-2
Zscan18	0.00673068	0.524958	0.407	0.384	1	3-2
Atp13a1	0.000108273	0.524626	0.442	0.374	1	3-2
Gad1	6.60681e-09	0.524457	0.23	0.059	0.000214411	3-2
Fxyd4	0.000271487	0.522913	0.265	0.153	1	3-2
Nisch	4.32665e-16	0.51993	0.858	0.921	1.40413e-11	3-2
Setd5	0.00760812	0.519372	0.566	0.74	1	3-2
Etnk1	4.22745e-10	0.519359	0.726	0.796	1.37193e-05	3-2
Srrm3	0.00524124	0.518659	0.566	0.707	1	3-2
Wdfy3	0.000202144	0.518411	0.593	0.69	1	3-2
Ar	1.37137e-06	0.51824	0.221	0.076	0.0445051	3-2
Atl1	7.69513e-06	0.517766	0.637	0.774	0.24973	3-2
Galnt17	0.00489699	0.517441	0.319	0.262	1	3-2
Ctsb	2.26417e-08	0.516798	0.717	0.875	0.000734791	3-2
App	1.23091e-10	0.516764	0.929	0.98	3.99469e-06	3-2
Impact	6.39056e-10	0.516704	0.761	0.667	2.07393e-05	3-2
Slc50a1	0.00888988	0.51593	0.354	0.316	1	3-2
Esyt3	6.09072e-12	0.515908	0.274	0.061	1.97662e-07	3-2
P2ry12	1.60746e-08	0.515664	0.204	0.046	0.000521669	3-2
Rab3gap2	0.00614722	0.514764	0.345	0.29	1	3-2
Gabrb3	2.61439e-06	0.514743	0.655	0.794	0.0848447	3-2
Psen2	0.000712808	0.51357	0.327	0.239	1	3-2
Nkx2-1	3.77062e-09	0.513423	0.354	0.145	0.000122368	3-2
Sel1l	0.00741591	0.51335	0.549	0.684	1	3-2
Cisd2	4.20958e-07	0.513183	0.681	0.84	0.0136613	3-2
Kcnc2	4.86605e-07	0.512566	0.327	0.16	0.0157918	3-2
Selenos	0.000252979	0.512287	0.451	0.427	1	3-2
Ammecr1	0.000127257	0.510958	0.301	0.183	1	3-2
mt-Co1	9.87281e-22	0.509673	1	1	3.20402e-17	3-2
Uggt2	0.00355697	0.509538	0.345	0.29	1	3-2
Thbs3	0.000429518	0.508744	0.292	0.186	1	3-2
Mcf2l	0.000764607	0.508727	0.575	0.707	1	3-2
Fchsd2	0.000609145	0.507794	0.531	0.598	1	3-2
Esr1	2.73447e-11	0.507431	0.257	0.056	8.87418e-07	3-2
Dync1h1	2.66031e-06	0.507025	0.673	0.847	0.0863351	3-2
D5Ertd579e	0.00856788	0.506677	0.549	0.679	1	3-2
Thy1	0.0040492	0.50662	0.46	0.427	1	3-2
Map2	3.81845e-08	0.505099	0.867	0.975	0.0012392	3-2
Atp1a2	2.64593e-05	0.505088	0.221	0.092	0.858685	3-2
Adgrl2	0.00803566	0.505075	0.398	0.364	1	3-2
Mfsd14a	0.00443393	0.504719	0.407	0.399	1	3-2
Cpne6	3.17472e-08	0.504514	0.265	0.089	0.00103029	3-2
Celf5	3.02993e-06	0.502781	0.735	0.916	0.0983303	3-2
Tfe3	0.00277679	0.502123	0.336	0.265	1	3-2
Hyou1	0.00249512	0.500085	0.363	0.31	1	3-2
Cers2	0.00278575	0.499309	0.442	0.445	1	3-2
Nfkb1	0.000245753	0.499056	0.327	0.221	1	3-2
Dmxl2	0.000533781	0.498672	0.566	0.651	1	3-2
Itgb1	0.00470313	0.497907	0.434	0.438	1	3-2
Ice1	0.000569411	0.497601	0.549	0.588	1	3-2
Tyrobp	9.98616e-09	0.497518	0.257	0.076	0.000324081	3-2
Cbarp	1.66009e-08	0.49689	0.805	0.924	0.000538749	3-2
Cntnap1	0.000413934	0.496421	0.363	0.272	1	3-2
Gnptg	0.00492414	0.494241	0.54	0.664	1	3-2
Pomt1	0.00246599	0.494079	0.327	0.257	1	3-2
D430041D05Rik	0.00301612	0.493066	0.487	0.537	1	3-2
Dnm1	1.42726e-05	0.489333	0.699	0.761	0.463188	3-2
Tulp4	0.000399472	0.48909	0.681	0.888	1	3-2
Kcnma1	5.24219e-06	0.487405	0.593	0.573	0.170125	3-2
Ccdc107	2.49931e-06	0.48724	0.646	0.743	0.0811101	3-2
[truncated: 177 more rows]

## Sheet: Cluster 2
Figure 2 - Source Data 3 (corresponding to Figure 2G). Feature genes that define each of the 2 subclusters
2-1 and 2-2 derived from reclustering of Cluster 2. Pomc(med)/Ebf1.
The data are sorted from highest to lowest for each subcuster by average log fold-change > 0.25
(avg_logFC) of gene expression in the featured subcluster relative to the other subclusters
pct.1, Percentage of cells in the indicated subcluster with significant differential gene expression
pct.2, Percentage of cells in the other subcluster with significant differential gene expression
p-val, p-value
p_val_adj, adjusted p-value for multiple comparisons
The Wilcoxon test was performed to identify the differentially expressed genes in each subcluster
Gene	p_val	avg_logFC	pct.1	pct.2	p_val_adj	subcluster
Pomc	2.5719e-70	1.378	1	1	8.3466e-66	2-1
Bex3	2.78178e-71	1.3595	0.454	0.079	9.02771e-67	2-1
Irs4	8.86718e-114	1.34662	0.545	0.057	2.87767e-109	2-1
Jpt1	5.8182e-73	1.24813	0.454	0.079	1.88818e-68	2-1
Elob	3.77929e-73	1.23668	0.454	0.079	1.22649e-68	2-1
Selenow	9.56092e-66	1.22944	0.454	0.079	3.10281e-61	2-1
Tbx3	4.33302e-142	1.08664	0.626	0.059	1.4062e-137	2-1
Asb4	1.33064e-130	1.07938	0.618	0.078	4.31831e-126	2-1
Selenok	1.7583e-72	1.06931	0.454	0.079	5.70623e-68	2-1
Peg10	1.84999e-136	1.06408	0.701	0.181	6.00376e-132	2-1
Peg3	1.58028e-100	1.01757	0.858	0.625	5.12847e-96	2-1
Fos	5.62114e-84	0.99804	0.576	0.156	1.82423e-79	2-1
Ahi1	1.57887e-100	0.984525	0.879	0.629	5.1239e-96	2-1
mt-Nd4l	2.08379e-68	0.916612	0.859	0.673	6.76251e-64	2-1
Isl1	5.43953e-145	0.910147	0.781	0.185	1.76529e-140	2-1
Syt4	2.7257e-111	0.896853	0.85	0.474	8.84571e-107	2-1
Calb2	3.18879e-87	0.889314	0.606	0.168	1.03486e-82	2-1
Nap1l5	1.36121e-76	0.886854	0.942	0.762	4.41754e-72	2-1
Hap1	3.90034e-102	0.874902	0.826	0.484	1.26578e-97	2-1
Selenof	2.31682e-69	0.86528	0.454	0.079	7.51878e-65	2-1
Six3	9.14425e-115	0.861838	0.572	0.072	2.96758e-110	2-1
Tceal9	2.31833e-76	0.860165	0.454	0.068	7.52368e-72	2-1
Caly	1.3515e-87	0.858053	0.859	0.602	4.38603e-83	2-1
Rack1	1.23862e-73	0.854979	0.452	0.072	4.0197e-69	2-1
Gpx3	1.19923e-94	0.837756	0.723	0.317	3.89187e-90	2-1
Zdbf2	6.80875e-99	0.818757	0.807	0.499	2.20965e-94	2-1
Sem1	6.93893e-72	0.81302	0.453	0.075	2.25189e-67	2-1
Efna5	6.75463e-104	0.801182	0.822	0.49	2.19208e-99	2-1
Nkx2-1	1.56873e-140	0.798701	0.667	0.08	5.09098e-136	2-1
Scg2	6.36967e-112	0.792745	0.72	0.238	2.06715e-107	2-1
Junb	1.56535e-66	0.779292	0.507	0.143	5.08003e-62	2-1
Nbdy	1.53691e-69	0.777684	0.451	0.076	4.98775e-65	2-1
Rtl8a	2.52542e-72	0.751747	0.451	0.071	8.19576e-68	2-1
Arhgdig	8.59504e-90	0.750782	0.792	0.426	2.78935e-85	2-1
Snu13	4.36609e-73	0.746743	0.453	0.072	1.41693e-68	2-1
Pcsk1n	7.78217e-93	0.743452	0.996	0.974	2.52555e-88	2-1
Ly6h	1.5712e-92	0.724221	0.996	0.946	5.099e-88	2-1
Cited1	8.52116e-96	0.71992	0.55	0.096	2.76537e-91	2-1
Cops9	1.14564e-71	0.703037	0.452	0.072	3.71794e-67	2-1
Khdrbs3	3.88787e-68	0.701075	0.695	0.419	1.26173e-63	2-1
Trir	1.80054e-70	0.699842	0.452	0.076	5.84331e-66	2-1
Fxyd6	5.37418e-91	0.674246	0.994	0.955	1.74408e-86	2-1
Fxyd7	1.3352e-88	0.665391	0.731	0.311	4.33313e-84	2-1
Pcdh19	1.274e-72	0.661461	0.574	0.202	4.1345e-68	2-1
Tspan7	3.32452e-91	0.653667	0.879	0.568	1.07891e-86	2-1
Alcam	3.21495e-83	0.646558	0.658	0.231	1.04335e-78	2-1
Gabra5	5.20491e-116	0.64464	0.617	0.11	1.68915e-111	2-1
Rit2	1.49705e-93	0.643453	0.675	0.22	4.85838e-89	2-1
Gpr101	4.54901e-99	0.628634	0.45	0.013	1.47629e-94	2-1
Nrgn	4.01292e-61	0.627795	0.413	0.07	1.30231e-56	2-1
Rrad	4.22178e-89	0.617522	0.454	0.036	1.37009e-84	2-1
Ecel1	8.43287e-75	0.615231	0.52	0.124	2.73672e-70	2-1
Pcdh7	3.91107e-79	0.605678	0.65	0.26	1.26926e-74	2-1
Eloc	8.94407e-68	0.601389	0.45	0.076	2.90262e-63	2-1
Rtraf	1.12569e-70	0.597289	0.452	0.074	3.6532e-66	2-1
Gria1	3.52188e-102	0.59551	0.652	0.193	1.14296e-97	2-1
Tox2	4.37414e-119	0.592551	0.704	0.18	1.41954e-114	2-1
Zcchc18	1.24386e-72	0.59026	0.907	0.704	4.03669e-68	2-1
AW551984	3.36105e-90	0.587989	0.756	0.366	1.09076e-85	2-1
mt-Atp8	9.89721e-77	0.587314	0.697	0.336	3.21194e-72	2-1
Ppp2r2b	8.8131e-84	0.584988	0.807	0.474	2.86011e-79	2-1
Id4	2.7974e-72	0.581015	0.636	0.214	9.07841e-68	2-1
Atp5o.1	8.82622e-68	0.580637	0.451	0.074	2.86437e-63	2-1
Rgs4	3.67754e-95	0.580156	0.589	0.12	1.19347e-90	2-1
Pdxp	3.70686e-66	0.574812	0.448	0.071	1.20299e-61	2-1
Pten	2.62884e-76	0.574268	0.844	0.599	8.53138e-72	2-1
Syt1	7.44496e-64	0.570265	0.893	0.667	2.41611e-59	2-1
Nexmif	6.86705e-79	0.56887	0.437	0.05	2.22856e-74	2-1
A730017C20Rik	6.21947e-96	0.568646	0.872	0.562	2.0184e-91	2-1
Hmgn3	2.25059e-76	0.563437	0.758	0.411	7.30385e-72	2-1
mt-Nd3	1.31476e-62	0.563056	0.974	0.937	4.26678e-58	2-1
Rtl8b	1.853e-71	0.562031	0.445	0.067	6.01354e-67	2-1
Rpl22l1	6.34506e-106	0.561309	0.995	0.977	2.05916e-101	2-1
Rnf128	1.38518e-86	0.555743	0.461	0.054	4.49532e-82	2-1
Gm42418	2.76561e-51	0.549844	0.748	0.517	8.97523e-47	2-1
Tceal3	1.12669e-86	0.549816	0.748	0.357	3.65646e-82	2-1
Vps28	2.57886e-70	0.547911	0.449	0.071	8.36918e-66	2-1
Calcr	5.83517e-79	0.546553	0.391	0.018	1.89369e-74	2-1
Hs6st2	7.03387e-69	0.545858	0.546	0.178	2.2827e-64	2-1
Plppr4	3.66753e-72	0.545059	0.523	0.13	1.19022e-67	2-1
Bex2	2.40174e-102	0.544892	0.999	0.996	7.79436e-98	2-1
Ptn	1.59744e-56	0.542483	0.781	0.503	5.18417e-52	2-1
Ppp1r9a	2.75993e-74	0.53655	0.761	0.446	8.95679e-70	2-1
mt-Co2	9.83292e-55	0.530938	1	1	3.19108e-50	2-1
Apoe	7.99797e-29	0.523577	0.394	0.15	2.59558e-24	2-1
Vgf	1.14562e-70	0.522253	0.503	0.118	3.7179e-66	2-1
Fabp3	2.55018e-73	0.522101	0.824	0.536	8.27611e-69	2-1
Snhg11	2.26698e-51	0.516626	0.967	0.932	7.35702e-47	2-1
Rex1bd	6.79006e-69	0.516329	0.443	0.074	2.20358e-64	2-1
Serp2	8.59657e-78	0.515914	0.959	0.848	2.78985e-73	2-1
B230209E15Rik	2.438e-72	0.51549	0.441	0.056	7.91204e-68	2-1
Selenoh	7.41688e-68	0.512712	0.448	0.071	2.407e-63	2-1
Sox2	1.01219e-89	0.502016	0.513	0.07	3.28485e-85	2-1
Resp18	1.23861e-52	0.50142	0.934	0.805	4.01966e-48	2-1
mt-Nd2	5.47049e-69	0.498793	1	0.999	1.77534e-64	2-1
Bex1	1.38807e-88	0.49261	0.991	0.879	4.50471e-84	2-1
Bex4	1.88579e-82	0.491748	0.963	0.805	6.11997e-78	2-1
Fmc1	4.32977e-71	0.490228	0.443	0.067	1.40514e-66	2-1
Pak3	6.26794e-65	0.489639	0.89	0.689	2.03414e-60	2-1
Syn2	2.67002e-68	0.488255	0.577	0.182	8.66502e-64	2-1
Zcchc12	5.80025e-56	0.486055	0.866	0.676	1.88235e-51	2-1
Aprt	1.99119e-94	0.480001	0.914	0.673	6.462e-90	2-1
Prkacb	1.886e-62	0.479186	0.881	0.682	6.12065e-58	2-1
Tbx3os1	1.74969e-101	0.474634	0.46	0.012	5.67827e-97	2-1
Nenf	2.96808e-61	0.473914	0.957	0.858	9.6323e-57	2-1
Pde10a	1.37334e-41	0.465335	0.564	0.275	4.45689e-37	2-1
Grm5	5.82715e-72	0.464199	0.501	0.111	1.89108e-67	2-1
Pcdh17	6.17986e-56	0.460754	0.676	0.367	2.00555e-51	2-1
Gaa	1.38083e-50	0.459823	0.632	0.34	4.48121e-46	2-1
Rpl15	8.00936e-97	0.458591	0.997	0.996	2.59928e-92	2-1
Scn2a	3.10289e-67	0.45629	0.431	0.058	1.00698e-62	2-1
Unc5d	2.11684e-81	0.456058	0.517	0.107	6.8698e-77	2-1
Grin2b	1.17256e-83	0.453418	0.625	0.171	3.80531e-79	2-1
Slc12a5	1.43244e-62	0.453167	0.607	0.245	4.6487e-58	2-1
Ntrk2	5.47349e-69	0.450575	0.647	0.262	1.77631e-64	2-1
Retreg2	1.48993e-65	0.445383	0.443	0.074	4.83527e-61	2-1
Lsamp	6.9894e-63	0.444975	0.849	0.589	2.26827e-58	2-1
Calb1	9.13895e-59	0.444446	0.595	0.226	2.96586e-54	2-1
Hdgfl3	6.80864e-67	0.44431	0.435	0.068	2.20961e-62	2-1
Ube2m	1.91952e-43	0.444191	0.892	0.81	6.2294e-39	2-1
Meg3	1.17872e-64	0.442903	0.996	0.974	3.82531e-60	2-1
Syp	1.65138e-61	0.439693	0.912	0.69	5.35922e-57	2-1
Gm47283	2.90835e-57	0.438629	0.407	0.071	9.43846e-53	2-1
Atp2b1	1.38047e-33	0.437958	0.899	0.851	4.48004e-29	2-1
Jun	1.0533e-42	0.436003	0.698	0.384	3.41828e-38	2-1
Vat1l	6.72213e-64	0.435418	0.732	0.38	2.18153e-59	2-1
Pea15a	5.6195e-68	0.434526	0.874	0.62	1.8237e-63	2-1
Psd	2.55407e-55	0.433018	0.816	0.594	8.28872e-51	2-1
Gabrb3	2.95239e-69	0.432468	0.804	0.482	9.5814e-65	2-1
Mcrip1	1.38488e-66	0.430801	0.444	0.07	4.49435e-62	2-1
Nrsn1	1.57881e-58	0.430318	0.803	0.468	5.12372e-54	2-1
Mbnl2	2.25101e-69	0.430174	0.583	0.2	7.30521e-65	2-1
Tubb2a	1.56688e-47	0.429479	0.999	0.995	5.085e-43	2-1
Fosb	1.16793e-61	0.42701	0.423	0.08	3.79029e-57	2-1
Pnmal2	6.26762e-51	0.426848	0.799	0.609	2.03403e-46	2-1
mt-Cytb	1.57871e-83	0.425486	1	1	5.12337e-79	2-1
Timp2	4.46679e-58	0.423871	0.692	0.367	1.44961e-53	2-1
Ntm	9.64185e-64	0.421086	0.832	0.523	3.12907e-59	2-1
Cspg5	8.27381e-53	0.419575	0.765	0.518	2.6851e-48	2-1
Nsd3	1.15821e-68	0.418927	0.433	0.066	3.75872e-64	2-1
Cbarp	1.40284e-36	0.415185	0.91	0.791	4.55264e-32	2-1
Mdga2	3.84724e-72	0.413833	0.56	0.168	1.24854e-67	2-1
Rab12	2.60532e-50	0.413307	0.66	0.398	8.45504e-46	2-1
Six6	1.89381e-66	0.409726	0.407	0.052	6.14599e-62	2-1
Nrsn2	2.05449e-61	0.407622	0.774	0.42	6.66742e-57	2-1
mt-Co1	2.12671e-73	0.407492	1	1	6.9018e-69	2-1
Dtd1	8.62322e-62	0.407156	0.832	0.552	2.79849e-57	2-1
2900055J20Rik	2.01477e-81	0.403203	0.559	0.116	6.53853e-77	2-1
Mt3	1.84642e-41	0.400432	0.632	0.331	5.9922e-37	2-1
Kcnip1	4.1055e-78	0.400317	0.62	0.195	1.33236e-73	2-1
Atp1b1	3.14188e-34	0.399926	0.938	0.836	1.01963e-29	2-1
Chmp2b	3.92648e-69	0.399592	0.63	0.255	1.27426e-64	2-1
2900097C17Rik	1.1794e-61	0.398653	0.436	0.074	3.82752e-57	2-1
Lsm7	1.46614e-57	0.397747	0.872	0.676	4.75805e-53	2-1
Camk2d	5.70974e-61	0.397043	0.682	0.328	1.85298e-56	2-1
Gabrb1	2.67274e-73	0.396454	0.52	0.111	8.67385e-69	2-1
mt-Atp6	1.2125e-86	0.395286	1	1	3.93493e-82	2-1
Chchd10	1.04457e-62	0.394431	0.64	0.238	3.38996e-58	2-1
Pura	1.84591e-56	0.394372	0.637	0.289	5.99053e-52	2-1
Gprasp2	6.45509e-49	0.39315	0.832	0.63	2.09487e-44	2-1
Prune2	1.7892e-68	0.390808	0.497	0.114	5.80648e-64	2-1
Rims2	3.82396e-62	0.390452	0.509	0.163	1.24099e-57	2-1
Eid1	5.03107e-66	0.390251	0.99	0.977	1.63273e-61	2-1
Gria2	9.42726e-53	0.388699	0.912	0.724	3.05943e-48	2-1
Tro	8.8569e-53	0.388564	0.676	0.388	2.87433e-48	2-1
Impact	1.51346e-35	0.386176	0.634	0.38	4.91163e-31	2-1
Pcbd1	7.8164e-56	0.384104	0.853	0.612	2.53666e-51	2-1
Baiap3	4.81848e-75	0.382905	0.494	0.094	1.56374e-70	2-1
Asic2	3.26804e-49	0.382877	0.48	0.165	1.06058e-44	2-1
Atp6v1g2	1.57184e-50	0.382125	0.751	0.459	5.1011e-46	2-1
Ndn	8.36476e-15	0.381931	0.878	0.908	2.71462e-10	2-1
Atp8a1	9.72115e-52	0.374047	0.675	0.367	3.15481e-47	2-1
Dbpht2	3.76057e-73	0.37222	0.511	0.119	1.22042e-68	2-1
Tmem130	5.91952e-42	0.372028	0.824	0.614	1.92106e-37	2-1
Arl4a	6.83106e-56	0.370421	0.824	0.536	2.21688e-51	2-1
Gprasp1	1.13155e-46	0.368383	0.891	0.718	3.67223e-42	2-1
Ppp1r1a	8.76642e-57	0.367543	0.906	0.698	2.84496e-52	2-1
Rps21	2.23781e-84	0.366435	0.999	0.996	7.26236e-80	2-1
Kcnk2	5.16653e-61	0.366395	0.577	0.202	1.67669e-56	2-1
Mrpl33	4.74405e-64	0.366152	0.927	0.734	1.53959e-59	2-1
Atp1a1	1.54641e-37	0.365661	0.737	0.526	5.01858e-33	2-1
Gabrg3	1.35324e-74	0.365094	0.435	0.056	4.39168e-70	2-1
Gng4	3.74535e-71	0.364356	0.543	0.141	1.21548e-66	2-1
Chl1	2.99096e-59	0.363682	0.765	0.394	9.70655e-55	2-1
Scg5	2.48737e-49	0.363229	0.945	0.844	8.07226e-45	2-1
Klhl2	1.54177e-68	0.363119	0.595	0.208	5.0035e-64	2-1
Prkce	8.04928e-59	0.360902	0.672	0.31	2.61223e-54	2-1
Pik3r1	2.85706e-47	0.360355	0.691	0.386	9.27202e-43	2-1
Smim26	6.33727e-70	0.359166	0.426	0.058	2.05663e-65	2-1
Eid2	3.6577e-37	0.35912	0.729	0.543	1.18703e-32	2-1
Cntn1	2.258e-46	0.35822	0.626	0.327	7.32787e-42	2-1
Ncald	7.43765e-44	0.357547	0.723	0.46	2.41374e-39	2-1
Pclo	1.02574e-43	0.357527	0.656	0.38	3.32885e-39	2-1
Usp29	4.12634e-51	0.356166	0.798	0.535	1.33912e-46	2-1
Camk2n2	1.42239e-40	0.355187	0.758	0.545	4.61607e-36	2-1
Eef1a2	4.07763e-45	0.354474	0.801	0.557	1.32331e-40	2-1
Ldb2	4.12935e-77	0.354284	0.494	0.096	1.3401e-72	2-1
Camk2a	1.95677e-76	0.354155	0.517	0.114	6.35032e-72	2-1
Pnmal1	3.64332e-53	0.353144	0.686	0.37	1.18237e-48	2-1
Nop10	2.08699e-62	0.350975	0.982	0.932	6.77292e-58	2-1
Lrrc4b	3.64105e-49	0.349689	0.754	0.499	1.18163e-44	2-1
Mycbp2	8.05254e-49	0.349077	0.906	0.769	2.61329e-44	2-1
Irf2bp2	7.15319e-66	0.348726	0.617	0.227	2.32142e-61	2-1
Tac2	7.53717e-19	0.347446	0.165	0.035	2.44604e-14	2-1
Dtna	4.71907e-56	0.346256	0.515	0.174	1.53148e-51	2-1
Cst3	1.4922e-39	0.346033	0.977	0.946	4.84262e-35	2-1
C1qtnf4	1.94786e-42	0.344793	0.875	0.668	6.3214e-38	2-1
Micu3	1.36996e-45	0.34456	0.758	0.501	4.44594e-41	2-1
Rasgrf2	9.83838e-64	0.34343	0.475	0.112	3.19285e-59	2-1
Gnb5	2.78789e-65	0.342863	0.417	0.062	9.04754e-61	2-1
Gstp1	1.61226e-53	0.34229	0.772	0.451	5.23225e-49	2-1
AI593442	4.87308e-68	0.341247	0.537	0.137	1.58146e-63	2-1
Dgkk	1.37295e-50	0.341224	0.338	0.049	4.45564e-46	2-1
Mrpl58	6.77823e-69	0.338533	0.426	0.058	2.19974e-64	2-1
Zim1	5.1413e-76	0.337735	0.463	0.074	1.66851e-71	2-1
Arfgef3	1.18345e-56	0.336439	0.503	0.156	3.84064e-52	2-1
Ndufa5	1.22593e-55	0.335875	0.98	0.926	3.97852e-51	2-1
Ptpro	5.42381e-62	0.334314	0.738	0.357	1.76019e-57	2-1
Vsnl1	2.81108e-60	0.333562	0.51	0.138	9.12278e-56	2-1
Gabrg1	6.17809e-73	0.332497	0.408	0.044	2.00497e-68	2-1
Fam183b	4.73523e-53	0.332061	0.611	0.256	1.53672e-48	2-1
Nptxr	3.67042e-48	0.331952	0.735	0.425	1.19116e-43	2-1
Nsd2	3.39231e-67	0.331248	0.428	0.059	1.10091e-62	2-1
Lrrc58	5.50671e-52	0.32929	0.838	0.585	1.78709e-47	2-1
Magel2	7.57629e-52	0.328539	0.634	0.284	2.45873e-47	2-1
Sesn3	5.19053e-46	0.327187	0.632	0.332	1.68448e-41	2-1
Arxes1	3.83098e-46	0.326766	0.89	0.656	1.24327e-41	2-1
Magi1	7.23923e-51	0.326755	0.718	0.384	2.34935e-46	2-1
N4bp2l1	2.02388e-73	0.326023	0.5	0.103	6.5681e-69	2-1
1500009L16Rik	5.50437e-27	0.32541	0.807	0.634	1.78633e-22	2-1
Hspe1	1.32556e-62	0.324395	0.987	0.96	4.30182e-58	2-1
Carmil3	2.64682e-65	0.322741	0.419	0.061	8.58974e-61	2-1
Tmx4	1.58082e-42	0.322247	0.873	0.664	5.13024e-38	2-1
Atp5g1	9.22071e-65	0.32215	0.993	0.99	2.9924e-60	2-1
Gkap1	2.12466e-47	0.320086	0.738	0.47	6.89516e-43	2-1
Nr4a1	1.91546e-45	0.319429	0.328	0.061	6.21624e-41	2-1
Nrxn2	4.1458e-42	0.318619	0.965	0.904	1.34544e-37	2-1
Jund	2.14245e-31	0.318137	0.988	0.977	6.9529e-27	2-1
mt-Nd5	3.01336e-40	0.317736	0.936	0.859	9.77927e-36	2-1
Cd200	1.09128e-48	0.316748	0.969	0.828	3.54152e-44	2-1
Spint2	1.14527e-57	0.315342	0.675	0.314	3.71674e-53	2-1
Pgk1	1.74976e-46	0.313866	0.621	0.31	5.6785e-42	2-1
S100a10	4.07269e-10	0.313684	0.58	0.413	1.32171e-05	2-1
Rps2	4.90338e-90	0.313679	0.999	1	1.59129e-85	2-1
Sirpa	9.11374e-57	0.312105	0.511	0.155	2.95768e-52	2-1
Vamp2	2.13155e-38	0.311296	0.98	0.953	6.91752e-34	2-1
Trank1	2.2724e-70	0.311016	0.492	0.103	7.37464e-66	2-1
Hikeshi	1.28235e-62	0.310413	0.412	0.065	4.1616e-58	2-1
Ctxn2	5.09918e-70	0.310039	0.491	0.088	1.65484e-65	2-1
Pfkp	7.42673e-53	0.309693	0.663	0.327	2.4102e-48	2-1
Lmna	2.01151e-43	0.308341	0.54	0.244	6.52796e-39	2-1
Selenot	1.84488e-60	0.308108	0.403	0.059	5.98718e-56	2-1
Car10	1.72843e-31	0.307985	0.54	0.276	5.60928e-27	2-1
Adgrl3	1.63879e-35	0.307857	0.703	0.469	5.31836e-31	2-1
Hpf1	2.05694e-62	0.307649	0.401	0.058	6.67538e-58	2-1
Gm17018	6.63732e-64	0.307342	0.411	0.058	2.15401e-59	2-1
Gabra2	1.52494e-53	0.307063	0.567	0.208	4.94888e-49	2-1
Gnb4	2.3624e-46	0.30622	0.736	0.441	7.6667e-42	2-1
B630019K06Rik	1.69754e-38	0.305493	0.855	0.667	5.50902e-34	2-1
Fbll1	1.10922e-43	0.305358	0.658	0.38	3.59975e-39	2-1
Fxyd2	7.36558e-62	0.304742	0.449	0.094	2.39035e-57	2-1
Chgb	4.15285e-57	0.303475	0.877	0.634	1.34772e-52	2-1
Negr1	1.4202e-46	0.303401	0.841	0.517	4.60899e-42	2-1
Egr1	8.37156e-43	0.302993	0.38	0.099	2.71682e-38	2-1
Adam23	1.23533e-50	0.302837	0.552	0.227	4.00902e-46	2-1
Mrfap1	3.11563e-50	0.301577	0.99	0.97	1.01111e-45	2-1
Rpl30	1.01246e-64	0.301461	0.997	0.996	3.28573e-60	2-1
Ppm1a	8.4882e-35	0.301321	0.804	0.61	2.75468e-30	2-1
H2-Q2	8.75048e-67	0.300034	0.395	0.044	2.83979e-62	2-1
Romo1	3.39511e-54	0.298256	0.991	0.95	1.10182e-49	2-1
Chst1	4.76327e-39	0.298146	0.589	0.307	1.54582e-34	2-1
Rab21	5.12501e-46	0.297965	0.609	0.298	1.66322e-41	2-1
Ap1s2	4.2999e-32	0.297885	0.87	0.68	1.39545e-27	2-1
Ndufc2	1.53007e-59	0.297733	0.99	0.968	4.96555e-55	2-1
Efnb3	1.26595e-38	0.29754	0.883	0.717	4.1084e-34	2-1
Camk2b	1.48663e-51	0.296772	0.681	0.327	4.82455e-47	2-1
Cadps	1.79881e-38	0.296402	0.706	0.452	5.83769e-34	2-1
Ss18l2	6.14287e-62	0.296397	0.414	0.062	1.99355e-57	2-1
Syt16	1.24647e-49	0.295893	0.7	0.351	4.04516e-45	2-1
Thra	3.22665e-44	0.295724	0.985	0.929	1.04715e-39	2-1
Naxe	3.67751e-64	0.29546	0.412	0.062	1.19346e-59	2-1
Mef2c	2.54756e-47	0.295397	0.335	0.061	8.26758e-43	2-1
Hs2st1	1.94219e-44	0.295205	0.659	0.362	6.30299e-40	2-1
Myt1l	8.79017e-55	0.294856	0.735	0.358	2.85267e-50	2-1
Tspan17	4.1828e-34	0.293697	0.703	0.441	1.35745e-29	2-1
Sult4a1	6.12833e-38	0.293066	0.742	0.488	1.98883e-33	2-1
Esr1	3.50125e-73	0.292803	0.362	0.013	1.13626e-68	2-1
Dnm1	1.8395e-35	0.29236	0.703	0.482	5.96973e-31	2-1
Jakmip1	5.37773e-52	0.290804	0.645	0.291	1.74524e-47	2-1
Ngb	5.13846e-68	0.288532	0.374	0.032	1.66758e-63	2-1
Hectd4	1.71124e-60	0.288337	0.406	0.062	5.55348e-56	2-1
Unc80	5.74924e-52	0.288095	0.463	0.133	1.8658e-47	2-1
Rpsa	1.98453e-65	0.287674	1	1	6.4404e-61	2-1
Mettl26	7.24487e-63	0.287389	0.387	0.053	2.35118e-58	2-1
Ppp2r2c	1.39643e-49	0.287198	0.683	0.328	4.53185e-45	2-1
Gem	5.77234e-52	0.287112	0.31	0.028	1.8733e-47	2-1
Npas4	7.71644e-55	0.286644	0.374	0.065	2.50422e-50	2-1
Ndufb2	1.45452e-47	0.286442	0.976	0.922	4.72034e-43	2-1
Abat	2.32322e-57	0.285675	0.551	0.18	7.53954e-53	2-1
Psd3	8.43535e-56	0.284272	0.554	0.194	2.73753e-51	2-1
Usmg5	2.50835e-56	0.283955	0.997	0.99	8.14036e-52	2-1
mt-Co3	3.77895e-62	0.283723	1	1	1.22638e-57	2-1
Hint1	2.59897e-70	0.283493	0.999	0.999	8.43444e-66	2-1
Hbb-bs	0.00898094	0.282947	0.176	0.22	1	2-1
Tub	1.14539e-36	0.282825	0.772	0.503	3.71714e-32	2-1
Dpp6	3.69887e-33	0.282808	0.723	0.491	1.2004e-28	2-1
Rnf138rt1	4.98255e-56	0.282104	0.368	0.057	1.61699e-51	2-1
Rwdd2a	1.17249e-58	0.281895	0.474	0.123	3.80508e-54	2-1
Hsph1	2.37029e-43	0.281536	0.67	0.371	7.6923e-39	2-1
Ntng1	2.07008e-51	0.28091	0.673	0.291	6.71803e-47	2-1
Slc22a17	1.61661e-32	0.280519	0.938	0.862	5.2464e-28	2-1
Ago2	3.24498e-41	0.279987	0.729	0.442	1.05309e-36	2-1
Mgat4b	1.50123e-38	0.279555	0.768	0.534	4.87195e-34	2-1
Gna11	2.21435e-38	0.279381	0.839	0.669	7.18624e-34	2-1
Slc6a1	3.50262e-59	0.279206	0.553	0.164	1.13671e-54	2-1
Ppp1r14c	1.80954e-54	0.2767	0.557	0.189	5.87251e-50	2-1
Irs2	6.73371e-47	0.276365	0.434	0.134	2.18529e-42	2-1
Cenpx	1.02061e-63	0.275693	0.4	0.057	3.3122e-59	2-1
Olfm2	9.41221e-35	0.275181	0.438	0.174	3.05454e-30	2-1
Cltb	2.39231e-38	0.274673	0.894	0.717	7.76376e-34	2-1
Kcnk12	1.02007e-67	0.274131	0.4	0.047	3.31043e-63	2-1
Ptprn	2.54343e-29	0.273587	0.721	0.482	8.2542e-25	2-1
Timm9	7.75087e-44	0.273346	0.815	0.567	2.51539e-39	2-1
Btbd3	1.1041e-41	0.273186	0.572	0.266	3.58315e-37	2-1
Igfbp5	1.37398e-65	0.272423	0.577	0.159	4.45899e-61	2-1
Tceal1	8.04622e-43	0.272046	0.71	0.395	2.61124e-38	2-1
Ube2e2	7.13445e-38	0.271712	0.853	0.645	2.31534e-33	2-1
AC160336.1	9.33218e-46	0.271567	0.319	0.049	3.02857e-41	2-1
Npy1r	7.66338e-58	0.270715	0.323	0.025	2.487e-53	2-1
Crabp1	1.12616e-24	0.269701	0.168	0.362	3.65473e-20	2-1
Tmem91	1.1827e-55	0.269049	0.435	0.092	3.83823e-51	2-1
Cpne4	1.60075e-16	0.268838	0.489	0.317	5.19491e-12	2-1
Rbbp7	2.91108e-35	0.268673	0.847	0.664	9.44734e-31	2-1
Atp6v0b	1.68954e-39	0.267931	0.985	0.977	5.48306e-35	2-1
Casp3	2.96181e-45	0.267586	0.483	0.174	9.61197e-41	2-1
Tbca	3.42776e-54	0.267445	0.994	0.983	1.11241e-49	2-1
Ttc3	9.06041e-42	0.266831	1	1	2.94038e-37	2-1
Nudt11	2.15614e-30	0.266424	0.861	0.674	6.99732e-26	2-1
Atp9a	5.97907e-31	0.266166	0.791	0.625	1.94039e-26	2-1
Brinp2	2.82085e-58	0.265783	0.503	0.134	9.1545e-54	2-1
Prdx1	2.58668e-36	0.265489	0.944	0.811	8.39456e-32	2-1
Lrch2	1.21461e-38	0.264478	0.683	0.373	3.94176e-34	2-1
Gas7	4.627e-53	0.264184	0.42	0.093	1.5016e-48	2-1
Zfr	2.22807e-35	0.263964	0.89	0.693	7.23077e-31	2-1
Camk4	3.82123e-51	0.263677	0.443	0.115	1.2401e-46	2-1
Dpm3	2.83778e-43	0.263497	0.738	0.437	9.20944e-39	2-1
Ankra2	2.61819e-39	0.263189	0.858	0.616	8.49682e-35	2-1
Fkbp2	1.19358e-34	0.262993	0.854	0.694	3.87354e-30	2-1
Nav1	9.5571e-32	0.262531	0.887	0.749	3.10156e-27	2-1
Lmtk3	4.27826e-42	0.262263	0.652	0.357	1.38842e-37	2-1
Unc5c	1.35699e-61	0.260763	0.494	0.118	4.40385e-57	2-1
Gm44644	2.38355e-60	0.260721	0.377	0.048	7.73532e-56	2-1
Fam171b	2.78585e-33	0.260654	0.855	0.709	9.04093e-29	2-1
Ncoa7	5.3068e-45	0.260652	0.612	0.287	1.72222e-40	2-1
Sptbn1	3.95785e-32	0.260222	0.916	0.801	1.28444e-27	2-1
Scrn1	1.85282e-36	0.260096	0.852	0.621	6.01296e-32	2-1
Tug1	1.46856e-61	0.259673	0.388	0.05	4.76592e-57	2-1
Ajap1	2.90121e-51	0.259265	0.393	0.081	9.41528e-47	2-1
Hprt	4.0179e-35	0.25923	0.741	0.51	1.30393e-30	2-1
Epm2aip1	4.88169e-34	0.259049	0.698	0.439	1.58425e-29	2-1
Pdgfa	1.38843e-45	0.258939	0.489	0.167	4.50587e-41	2-1
Plppr5	1.40679e-68	0.258739	0.427	0.065	4.56546e-64	2-1
Klf6	1.07969e-30	0.258327	0.744	0.487	3.5039e-26	2-1
Araf	4.48768e-33	0.258099	0.956	0.889	1.45639e-28	2-1
Tusc3	3.36194e-29	0.258003	0.927	0.851	1.09105e-24	2-1
Atn1	7.15083e-59	0.2578	0.393	0.061	2.32066e-54	2-1
Atp2a2	3.35918e-32	0.257312	0.795	0.611	1.09015e-27	2-1
Map9	4.5493e-36	0.257171	0.801	0.536	1.47638e-31	2-1
Matk	8.85286e-52	0.2571	0.436	0.103	2.87302e-47	2-1
Hras	8.92556e-30	0.256847	0.941	0.908	2.89661e-25	2-1
Prrc2c	2.31713e-26	0.256431	0.869	0.765	7.51978e-22	2-1
Purb	2.40363e-28	0.256226	0.566	0.315	7.80051e-24	2-1
Paxx	1.52276e-58	0.255974	0.403	0.063	4.94183e-54	2-1
Celf6	5.01881e-26	0.255708	0.829	0.669	1.62876e-21	2-1
Slc6a17	3.72598e-42	0.255342	0.506	0.196	1.20919e-37	2-1
2210016L21Rik	2.9074e-30	0.255251	0.89	0.749	9.4354e-26	2-1
Ache	3.9382e-40	0.254383	0.517	0.212	1.27806e-35	2-1
Ndufa4	1.27959e-54	0.252817	0.999	0.999	4.15266e-50	2-1
Prkar1b	3.14489e-30	0.25281	0.853	0.694	1.02061e-25	2-1
Itm2c	7.72676e-29	0.252325	0.896	0.788	2.50756e-24	2-1
Arxes2	2.57584e-33	0.252185	0.949	0.786	8.35936e-29	2-1
Ssr4	6.68718e-32	0.252025	0.906	0.815	2.17019e-27	2-1
Pnck	1.12405e-34	0.251059	0.745	0.468	3.64789e-30	2-1
Rac3	6.81949e-34	0.250106	0.971	0.899	2.21313e-29	2-1
Astn1	7.24556e-45	0.250098	0.745	0.413	2.3514e-40	2-1
Necab2	2.43112e-33	1.36673	0.663	0.655	7.88972e-29	2-2
Lhx9	7.79157e-117	1.17931	0.609	0.169	2.5286e-112	2-2
Crabp2	1.31122e-75	1.09916	0.673	0.305	4.25531e-71	2-2
Nwd2	1.69991e-51	1.049	0.472	0.235	5.51672e-47	2-2
Gng8	1.76339e-86	0.971119	0.474	0.115	5.72273e-82	2-2
Pou4f1	4.03988e-71	0.954395	0.565	0.217	1.31106e-66	2-2
Hbb-y	9.46038e-107	0.928045	0.849	0.374	3.07018e-102	2-2
Tcf7l2	1.6866e-17	0.92089	0.54	0.534	5.47353e-13	2-2
Mab21l2	2.35368e-104	0.904281	0.65	0.216	7.63839e-100	2-2
Meis2	1.61127e-38	0.895009	0.304	0.093	5.22905e-34	2-2
Igfbpl1	2.13031e-84	0.887499	0.751	0.352	6.91349e-80	2-2
Lamp5	1.64804e-30	0.874933	0.189	0.042	5.34838e-26	2-2
Onecut2	2.01594e-77	0.874192	0.761	0.407	6.54232e-73	2-2
Nrn1	2.65884e-107	0.836495	0.72	0.288	8.62873e-103	2-2
Cd24a	2.68786e-122	0.835872	0.952	0.678	8.7229e-118	2-2
Nhlh2	2.09235e-91	0.820937	0.916	0.654	6.7903e-87	2-2
Cartpt	0.00185499	0.782524	0.332	0.299	1	2-2
Trp53i11	2.65298e-119	0.781859	0.903	0.471	8.60973e-115	2-2
Nr4a2	2.50167e-72	0.77561	0.663	0.317	8.11866e-68	2-2
Tspan13	2.31032e-59	0.765378	0.986	0.984	7.49769e-55	2-2
Lhx1os	1.36163e-46	0.765091	0.238	0.04	4.41889e-42	2-2
Ebf1	1.14439e-92	0.750769	0.859	0.331	3.71388e-88	2-2
Olfm1	1.74356e-109	0.744011	0.957	0.805	5.65837e-105	2-2
Mir124-2hg	3.86752e-125	0.71804	0.82	0.34	1.25513e-120	2-2
Nr2f1	2.42399e-51	0.715136	0.452	0.177	7.86656e-47	2-2
Ina	5.03927e-99	0.708483	0.988	0.961	1.63539e-94	2-2
Islr2	1.43895e-66	0.690601	0.773	0.45	4.66983e-62	2-2
Irx2	7.56108e-101	0.68894	0.72	0.229	2.4538e-96	2-2
Hist3h2ba	3.88302e-110	0.673476	0.981	0.944	1.26016e-105	2-2
Ddah2	1.66619e-106	0.673017	0.973	0.895	5.40729e-102	2-2
Cdkn1c	2.56003e-88	0.672299	0.884	0.537	8.30806e-84	2-2
Zic1	8.90113e-58	0.669078	0.558	0.218	2.88868e-53	2-2
Tac1	7.13765e-17	0.658688	0.337	0.207	2.31638e-12	2-2
Sncg	8.89483e-39	0.642241	0.624	0.356	2.88664e-34	2-2
Hbb-bh1	1.85945e-51	0.625269	0.465	0.166	6.03446e-47	2-2
Hba-x	1.94394e-58	0.589928	0.574	0.241	6.30867e-54	2-2
Cnn3	2.92726e-90	0.587811	0.857	0.423	9.49982e-86	2-2
Hist3h2a	1.45211e-95	0.587803	0.877	0.504	4.71254e-91	2-2
Pantr1	3.73313e-83	0.581284	0.601	0.213	1.21151e-78	2-2
Thsd7a	7.44593e-74	0.573865	0.677	0.368	2.41643e-69	2-2
Cbln2	7.36884e-42	0.573106	0.566	0.292	2.39141e-37	2-2
Lhx1	2.11958e-48	0.560279	0.214	0.025	6.87866e-44	2-2
Tuba1a	1.22423e-83	0.548676	1	1	3.97301e-79	2-2
Sox11	5.37528e-63	0.548622	0.974	0.964	1.74444e-58	2-2
Cxxc5	2.14814e-100	0.546088	0.87	0.552	6.97136e-96	2-2
Lmo3	9.30871e-38	0.545593	0.588	0.397	3.02095e-33	2-2
St6galnac5	8.0407e-42	0.540999	0.481	0.263	2.60945e-37	2-2
Hba-a1	6.9114e-99	0.529985	0.813	0.348	2.24296e-94	2-2
Uncx	1.319e-81	0.527026	0.349	0.042	4.28056e-77	2-2
D930028M14Rik	2.99897e-43	0.491699	0.714	0.392	9.73257e-39	2-2
Ebf3	7.65956e-87	0.474931	0.585	0.176	2.48576e-82	2-2
Carhsp1	3.77331e-69	0.46992	0.901	0.682	1.22455e-64	2-2
Irx1	2.6869e-61	0.465342	0.565	0.216	8.71979e-57	2-2
Rpl13a	2.35471e-37	0.463301	0.968	0.934	7.64173e-33	2-2
Cdk4	5.19557e-65	0.462069	0.964	0.93	1.68612e-60	2-2
Nt5dc2	5.13606e-68	0.45512	0.894	0.736	1.6668e-63	2-2
Pkm	2.507e-64	0.454691	0.99	0.976	8.13597e-60	2-2
Clic1	2.00322e-53	0.453913	0.628	0.281	6.50106e-49	2-2
Sox4	1.04505e-48	0.453077	0.972	0.966	3.39149e-44	2-2
Kctd8	1.16485e-45	0.451224	0.434	0.2	3.78029e-41	2-2
Ldhb	4.41795e-44	0.45113	0.941	0.924	1.43376e-39	2-2
Tmeff1	7.32333e-80	0.447654	0.968	0.932	2.37664e-75	2-2
Vav3	6.86641e-51	0.444604	0.548	0.306	2.22835e-46	2-2
Gnb2l1	8.71287e-49	0.44435	0.92	0.541	2.82759e-44	2-2
Hn1	2.02248e-39	0.443313	0.921	0.546	6.56356e-35	2-2
Mn1	5.04178e-37	0.441049	0.643	0.483	1.63621e-32	2-2
H2afv	2.9603e-77	0.428446	0.951	0.846	9.60707e-73	2-2
Homer2	1.05721e-36	0.427773	0.557	0.371	3.43096e-32	2-2
Serf2	5.52597e-74	0.427687	0.99	0.976	1.79334e-69	2-2
2700060E02Rik	2.06595e-55	0.427326	0.906	0.535	6.70463e-51	2-2
Cacnb3	2.16557e-37	0.422576	0.889	0.88	7.02791e-33	2-2
Ptma	4.8459e-91	0.421005	1	1	1.57264e-86	2-2
Atat1	1.1619e-71	0.420641	0.957	0.886	3.77072e-67	2-2
Hba-a2	2.89942e-83	0.41995	0.761	0.32	9.4095e-79	2-2
H1f0	6.81834e-37	0.419324	0.798	0.685	2.21276e-32	2-2
Neurod1	1.90145e-40	0.415938	0.298	0.085	6.17077e-36	2-2
Wbp1	2.48809e-69	0.415585	0.876	0.673	8.0746e-65	2-2
Cyth2	5.41238e-70	0.415164	0.953	0.91	1.75648e-65	2-2
Sept6	7.80966e-67	0.415087	0.809	0.454	2.53447e-62	2-2
Robo3	3.79422e-36	0.409229	0.189	0.03	1.23134e-31	2-2
Mest	1.30631e-11	0.408497	0.616	0.581	4.23937e-07	2-2
Phf21b	2.57877e-71	0.405583	0.549	0.208	8.3689e-67	2-2
Actg1	8.29846e-79	0.403033	1	1	2.6931e-74	2-2
Sbk1	8.60412e-65	0.402394	0.969	0.878	2.79229e-60	2-2
Rnf165	7.71292e-52	0.402215	0.858	0.719	2.50308e-47	2-2
Tax1bp3	3.01841e-53	0.400963	0.811	0.603	9.79564e-49	2-2
Ubald2	7.63418e-63	0.400475	0.929	0.831	2.47752e-58	2-2
Selk	2.19792e-42	0.397663	0.92	0.546	7.13291e-38	2-2
Elavl2	2.57795e-39	0.39709	0.84	0.753	8.36622e-35	2-2
Tesc	2.57071e-15	0.396656	0.386	0.285	8.34272e-11	2-2
Ftl1	3.95094e-78	0.396499	1	1	1.2822e-73	2-2
Pou3f4	9.04207e-69	0.395536	0.464	0.14	2.93442e-64	2-2
Eef2	2.83234e-72	0.392514	0.997	1	9.1918e-68	2-2
Traf4	1.62034e-48	0.386771	0.836	0.696	5.2585e-44	2-2
Fam57b	1.9231e-61	0.386078	0.938	0.88	6.24103e-57	2-2
Tmem2	2.08557e-57	0.382039	0.672	0.383	6.76831e-53	2-2
H3f3a	6.60313e-106	0.381728	1	1	2.14292e-101	2-2
Ctnnb1	9.61519e-51	0.377161	0.925	0.864	3.12042e-46	2-2
Cotl1	5.44318e-49	0.376595	0.957	0.941	1.76647e-44	2-2
Atp5o	2.38486e-43	0.375999	0.912	0.541	7.73957e-39	2-2
2310036O22Rik	7.98569e-51	0.37525	0.895	0.533	2.5916e-46	2-2
Syt6	2.45794e-50	0.374106	0.317	0.079	7.97676e-46	2-2
Hdgfrp3	1.19176e-52	0.373915	0.875	0.518	3.86761e-48	2-2
Sepw1	1.67926e-26	0.373223	0.921	0.545	5.44969e-22	2-2
Bmp7	1.86164e-42	0.372017	0.408	0.165	6.04158e-38	2-2
Tagln3	5.88543e-54	0.371943	0.986	0.983	1.91e-49	2-2
Msi2	2.11631e-22	0.37025	0.752	0.755	6.86805e-18	2-2
Lbx1	6.89084e-39	0.368926	0.178	0.021	2.23629e-34	2-2
Pcsk2	3.10343e-28	0.367134	0.574	0.407	1.00716e-23	2-2
Clmp	4.1809e-38	0.366541	0.798	0.674	1.35683e-33	2-2
Dcx	1.97409e-44	0.365667	0.955	0.95	6.40653e-40	2-2
Plpp4	4.28525e-54	0.359709	0.278	0.048	1.39069e-49	2-2
Fscn1	5.31959e-61	0.35873	0.978	0.98	1.72637e-56	2-2
Uba1	5.28753e-41	0.357653	0.926	0.887	1.71596e-36	2-2
Ube2e3	8.12127e-54	0.356253	0.983	0.978	2.63559e-49	2-2
Tubb3	1.54656e-60	0.35332	0.996	0.999	5.01906e-56	2-2
Tubb5	4.21861e-72	0.351791	1	1	1.36907e-67	2-2
Rmst	2.91356e-34	0.349849	0.77	0.669	9.45537e-30	2-2
Mab21l1	4.29942e-49	0.3496	0.242	0.038	1.39529e-44	2-2
Nrep	2.85453e-49	0.348389	0.934	0.815	9.26382e-45	2-2
Tubb2b	2.46362e-69	0.347196	1	1	7.99517e-65	2-2
Rgma	3.97827e-61	0.346868	0.55	0.217	1.29107e-56	2-2
Acvr2b	1.98347e-50	0.346385	0.776	0.592	6.43696e-46	2-2
Smarce1	1.97023e-53	0.343926	0.937	0.919	6.39398e-49	2-2
Pbx3	5.07109e-45	0.342898	0.57	0.317	1.64572e-40	2-2
Cplx2	3.53221e-11	0.342536	0.565	0.563	1.14631e-06	2-2
Ckb	1.34442e-52	0.341694	0.99	0.965	4.36304e-48	2-2
Map1b	2.1095e-63	0.340664	0.997	0.999	6.84594e-59	2-2
Cited2	1.6283e-21	0.339696	0.846	0.821	5.28433e-17	2-2
Snn	1.0145e-44	0.33791	0.809	0.666	3.29236e-40	2-2
Btf3l4	1.45577e-45	0.333605	0.926	0.778	4.72442e-41	2-2
Cttnbp2	3.06632e-21	0.333043	0.62	0.548	9.95112e-17	2-2
Fam134a	2.09873e-49	0.332766	0.761	0.443	6.81102e-45	2-2
Parp6	6.28624e-56	0.332098	0.939	0.888	2.04007e-51	2-2
Hnrnpa1	2.43345e-57	0.331848	0.996	1	7.89729e-53	2-2
Rnf114	5.47283e-49	0.33183	0.673	0.426	1.7761e-44	2-2
Fam195b	7.5409e-45	0.331263	0.853	0.5	2.44725e-40	2-2
Bzw2	4.91607e-38	0.326563	0.933	0.94	1.59541e-33	2-2
Mmd	5.57316e-44	0.326355	0.875	0.774	1.80866e-39	2-2
Ebf2	1.16746e-46	0.323854	0.397	0.136	3.78877e-42	2-2
Tceb2	6.99877e-25	0.323549	0.921	0.546	2.27131e-20	2-2
Mpnd	4.16441e-47	0.322907	0.879	0.786	1.35148e-42	2-2
Pcbp4	8.3793e-42	0.320745	0.972	0.966	2.71933e-37	2-2
Lmnb1	2.85868e-42	0.319545	0.708	0.486	9.27728e-38	2-2
Insm1	2.24709e-28	0.319504	0.45	0.257	7.2925e-24	2-2
Tceb1	1.24278e-39	0.318967	0.893	0.519	4.0332e-35	2-2
Tmem163	1.97022e-30	0.318646	0.714	0.565	6.39394e-26	2-2
Eif4a1	9.25164e-47	0.317613	0.997	0.998	3.00243e-42	2-2
Ube2d1	6.44229e-50	0.315582	0.955	0.903	2.09072e-45	2-2
Hdac2	1.57212e-42	0.315403	0.964	0.966	5.10201e-38	2-2
Hnrnpa2b1	5.40746e-45	0.314586	0.986	0.995	1.75488e-40	2-2
Crmp1	4.12027e-40	0.314159	0.987	0.987	1.33715e-35	2-2
Hmgn1	1.69131e-63	0.312751	0.994	0.999	5.4888e-59	2-2
Kif26a	7.78159e-50	0.31263	0.415	0.147	2.52536e-45	2-2
Asic4	1.02377e-53	0.310425	0.36	0.092	3.32245e-49	2-2
Taf13	4.5665e-50	0.309922	0.743	0.498	1.48197e-45	2-2
Mdk	4.40599e-08	0.309884	0.229	0.148	0.00142988	2-2
Ngfrap1	3.85936e-22	0.309651	0.916	0.546	1.25248e-17	2-2
Sh3bp1	2.27027e-42	0.309488	0.765	0.47	7.36769e-38	2-2
Parvb	7.4253e-21	0.308606	0.513	0.373	2.40973e-16	2-2
Irx5	1.38224e-41	0.307803	0.448	0.168	4.48577e-37	2-2
Cfl1	3.56592e-79	0.307202	0.999	0.999	1.15725e-74	2-2
Zic4	2.18298e-32	0.30421	0.367	0.141	7.08444e-28	2-2
Mex3a	5.97812e-38	0.304178	0.802	0.64	1.94008e-33	2-2
Khdrbs1	5.81282e-41	0.303969	0.946	0.936	1.88643e-36	2-2
Ppp1cc	1.38352e-46	0.303599	0.951	0.938	4.48994e-42	2-2
Slc25a5	7.53328e-37	0.303164	0.961	0.901	2.44477e-32	2-2
Gltscr2	3.07758e-40	0.301753	0.764	0.463	9.98766e-36	2-2
Pcbp2	6.38498e-50	0.301694	0.981	0.986	2.07212e-45	2-2
2700094K13Rik	3.26969e-38	0.301391	0.853	0.503	1.06111e-33	2-2
Hnrnpab	1.6104e-46	0.300555	0.966	0.976	5.22622e-42	2-2
Sdcbp	1.33703e-37	0.300546	0.879	0.838	4.33906e-33	2-2
Iglon5	2.27278e-38	0.298717	0.605	0.408	7.37585e-34	2-2
Ddx5	1.33316e-48	0.298717	1	0.996	4.32651e-44	2-2
Sep15	1.04321e-34	0.296514	0.885	0.527	3.38554e-30	2-2
Pou3f3	2.89237e-45	0.296496	0.389	0.139	9.38661e-41	2-2
Zfp422	1.83667e-44	0.296113	0.815	0.658	5.96055e-40	2-2
Narf	3.0018e-42	0.295455	0.694	0.522	9.74175e-38	2-2
Chd7	2.20237e-44	0.294383	0.672	0.359	7.14736e-40	2-2
Ilf2	5.03389e-38	0.294309	0.941	0.915	1.63365e-33	2-2
Ckap4	5.17809e-38	0.294242	0.809	0.649	1.68045e-33	2-2
Nono	3.10762e-42	0.294013	0.97	0.97	1.00851e-37	2-2
Map1lc3b	3.13096e-52	0.293971	0.986	0.973	1.01609e-47	2-2
Wbp5	1.96819e-37	0.293141	0.901	0.537	6.38738e-33	2-2
Srp54b	3.53269e-41	0.291479	0.78	0.454	1.14646e-36	2-2
Shox2	1.71832e-20	0.29139	0.295	0.134	5.57646e-16	2-2
Eef1g	1.048e-46	0.288794	0.991	0.999	3.40108e-42	2-2
Dach1	9.49238e-46	0.286549	0.474	0.202	3.08056e-41	2-2
Eif4g2	2.67699e-65	0.286449	1	1	8.68763e-61	2-2
Pitx2	6.31376e-18	0.285584	0.15	0.045	2.04901e-13	2-2
Chst8	1.4245e-32	0.284843	0.531	0.309	4.62293e-28	2-2
Syt13	2.02969e-13	0.284605	0.654	0.626	6.58695e-09	2-2
Klhl13	1.69524e-24	0.282499	0.618	0.503	5.50157e-20	2-2
Tfap2a	5.20344e-19	0.282282	0.14	0.038	1.68867e-14	2-2
Epb41	6.95104e-23	0.282193	0.581	0.469	2.25582e-18	2-2
Smarcd1	2.42387e-37	0.281886	0.824	0.7	7.86617e-33	2-2
Rem2	2.63843e-20	0.281827	0.655	0.57	8.56251e-16	2-2
Ppp1r14a	8.97158e-10	0.281179	0.18	0.095	2.91155e-05	2-2
Tonsl	2.75882e-33	0.279992	0.868	0.582	8.95319e-29	2-2
Dpysl4	1.95215e-25	0.279513	0.853	0.815	6.33533e-21	2-2
Ephb1	9.76226e-30	0.278905	0.508	0.295	3.16815e-25	2-2
Robo1	3.55131e-26	0.278886	0.618	0.513	1.15251e-21	2-2
Cyb5r4	1.6247e-34	0.278511	0.681	0.517	5.27262e-30	2-2
Cbx1	3.90807e-33	0.278331	0.867	0.831	1.26829e-28	2-2
Zfp811	1.13373e-34	0.277816	0.68	0.479	3.6793e-30	2-2
Ap3s1	1.19061e-37	0.277785	0.948	0.927	3.86389e-33	2-2
Cntfr	2.44832e-19	0.277313	0.641	0.582	7.94555e-15	2-2
Pou6f2	3.5082e-20	0.277189	0.581	0.407	1.13852e-15	2-2
Ndnl2	9.05296e-29	0.275455	0.571	0.342	2.93796e-24	2-2
Ict1	1.75834e-39	0.274933	0.762	0.444	5.70635e-35	2-2
Msi1	3.61541e-34	0.274593	0.764	0.627	1.17331e-29	2-2
Ube2g1	3.12708e-39	0.273946	0.846	0.742	1.01483e-34	2-2
Pou3f2	6.31075e-30	0.273934	0.377	0.181	2.04803e-25	2-2
Hbb-bt	6.68325e-41	0.273218	0.513	0.236	2.16891e-36	2-2
Nhp2l1	2.12269e-34	0.272903	0.867	0.523	6.88876e-30	2-2
Raly	1.18885e-38	0.27262	0.95	0.921	3.85818e-34	2-2
Tdg	2.11028e-35	0.271731	0.848	0.778	6.84849e-31	2-2
Chst2	3.13754e-05	0.270877	0.588	0.596	1	2-2
Cxx1b	2.98714e-33	0.270469	0.836	0.511	9.69417e-29	2-2
Gm2694	6.80924e-27	0.269789	0.59	0.384	2.2098e-22	2-2
Slc32a1	3.39265e-14	0.269129	0.18	0.079	1.10102e-09	2-2
Vash2	1.01704e-29	0.268902	0.59	0.411	3.30061e-25	2-2
H3f3b	1.96422e-61	0.26876	1	1	6.3745e-57	2-2
R3hdm4	2.62777e-31	0.268089	0.916	0.902	8.52791e-27	2-2
Trim28	3.95415e-25	0.26719	0.879	0.861	1.28324e-20	2-2
Ezh2	7.38677e-33	0.26652	0.597	0.37	2.39723e-28	2-2
Ube2a	1.61833e-42	0.265889	0.73	0.463	5.25196e-38	2-2
Igdcc3	9.31942e-36	0.265707	0.379	0.162	3.02443e-31	2-2
Lhx5	1.72846e-09	0.264969	0.204	0.122	5.60938e-05	2-2
1810058I24Rik	2.39516e-31	0.264751	0.832	0.737	7.77302e-27	2-2
Erh	4.40067e-34	0.26403	0.991	0.998	1.42815e-29	2-2
Gdi1	4.90604e-36	0.263812	0.977	0.981	1.59216e-31	2-2
Slmo2	3.43803e-39	0.262505	0.702	0.396	1.11574e-34	2-2
Rbmx	2.96592e-25	0.26234	0.786	0.703	9.62528e-21	2-2
Dmrtb1	3.39124e-32	0.26188	0.531	0.265	1.10056e-27	2-2
Auts2	4.7854e-19	0.261648	0.753	0.663	1.55301e-14	2-2
Gng5	3.72327e-27	0.261546	0.903	0.855	1.20831e-22	2-2
Midn	2.33883e-28	0.261452	0.835	0.753	7.59019e-24	2-2
Irx3	2.99892e-32	0.261064	0.399	0.167	9.7324e-28	2-2
Bnip3l	2.14318e-43	0.260958	0.937	0.916	6.95527e-39	2-2
Smarca4	1.9122e-29	0.259697	0.907	0.891	6.20566e-25	2-2
Srrm3	3.0661e-24	0.259323	0.716	0.651	9.95041e-20	2-2
Nkain4	3.76821e-31	0.259147	0.433	0.22	1.2229e-26	2-2
Ddr1	4.98896e-32	0.259072	0.58	0.41	1.61907e-27	2-2
1110001J03Rik	1.38756e-36	0.258935	0.789	0.477	4.50305e-32	2-2
Cxx1a	2.4652e-27	0.258072	0.882	0.538	8.00031e-23	2-2
1810041L15Rik	3.2176e-12	0.257846	0.464	0.373	1.04421e-07	2-2
Patz1	1.95959e-22	0.257571	0.642	0.549	6.35944e-18	2-2
Meis1	4.80081e-33	0.257051	0.221	0.054	1.55801e-28	2-2
Pole4	7.49653e-27	0.256899	0.593	0.44	2.43285e-22	2-2
Igf2bp3	1.81706e-30	0.256799	0.59	0.372	5.89692e-26	2-2
Plppr1	5.94537e-22	0.255393	0.689	0.59	1.92945e-17	2-2
Suv420h2	2.94426e-39	0.255151	0.531	0.271	9.555e-35	2-2
Fdft1	8.90438e-16	0.254729	0.881	0.858	2.88974e-11	2-2
Sap30	1.00463e-31	0.254534	0.658	0.429	3.26033e-27	2-2
Prdx2	1.78628e-40	0.25403	0.999	0.999	5.79701e-36	2-2
Pcbp1	6.6542e-35	0.253993	0.978	0.976	2.15949e-30	2-2
Myeov2	1.66724e-30	0.253162	0.899	0.541	5.4107e-26	2-2
Gareml	8.27884e-50	0.253047	0.363	0.107	2.68673e-45	2-2
Bcl11a	1.00092e-16	0.252884	0.497	0.353	3.24828e-12	2-2
Rgmb	1.87742e-24	0.252801	0.539	0.416	6.0928e-20	2-2
Dcakd	4.13467e-31	0.252766	0.908	0.877	1.34183e-26	2-2
Mecom	1.42233e-24	0.252424	0.111	0.013	4.61589e-20	2-2
Lbh	3.4492e-18	0.251345	0.769	0.732	1.11937e-13	2-2
Apba2	3.155e-23	0.250854	0.828	0.792	1.02389e-18	2-2
