# Supplementary material for: Developmental single-cell transcriptomics of hypothalamic POMC neurons reveal the genetic trajectories of multiple neuropeptidergic phenotypes
Source: eLife. 2022 Jan 19;11:e72883. doi: 10.7554/eLife.72883 (PMC8806186; doi:10.7554/eLife.72883)
Supplement: Figure 4—source data 1. [file elife-72883-fig4-data1.xlsx]

## Sheet: E11.5
Figure 4-Source Data 1 (corresponding to Figure4 and Figure4-figure supplement 1). Average gene expression [exp(logNormalized counts)-1)]
obtained from the Seurat analysis of each subcluster unique to the six developmental stages
Gene expression data are sorted based on highest to lowest for subcluster E11.5-1 starting with Tuba1a
E11.5 SubCluster:	E11.5-1	E11.5-2	E11.5-3	E11.5-4	E11.5-5	E11.5-6	E11.5-7	E11.5-8	E11.5-9
Gene
Tuba1a	166.311	212.636	43.5802	161.038	218.583	196.304	172.667	251.224	132.783
Malat1	128.937	178.574	60.2285	127.655	125.949	174.956	95.0743	137.24	232.79
Eef1a1	79.2975	66.9898	55.0876	68.4707	65.8905	57.3763	64.7885	53.1603	84.6667
Tmsb10	76.6045	67.0484	69.7027	90.6234	89.0669	75.3761	74.904	87.6671	55.7107
mt-Atp6	70.5349	70.2332	62.1942	85.9295	60.2521	60.2807	62.8235	54.7583	81.8701
Actg1	68.399	90.6552	51.9989	78.3214	83.8792	69.3457	97.8143	83.6677	57.5874
Tubb5	66.9416	71.7885	33.2201	58.9852	69.2937	61.5659	62.5253	73.6443	49.5546
Tubb2b	63.3088	80.7714	8.93978	49.9483	71.701	65.2892	49.115	84.4306	39.5985
Tmsb4x	61.2935	68.7294	66.2138	88.7833	101.763	137.432	119.946	104.291	57.9268
Actb	56.3075	56.868	48.2452	54.8329	60.9036	54.2949	67.4509	53.646	35.6111
Ftl1	54.379	60.6846	51.0233	54.7813	58.6668	77.2572	54.3548	56.0496	70.3511
Stmn1	52.8089	71.6098	21.0689	70.7111	62.7128	71.2195	84.5338	83.1446	45.0581
Nnat	51.7282	35.7709	16.0257	29.8014	20.2972	32.1792	19.7745	51.3713	57.0164
Ptma	47.8083	59.7337	54.2943	51.6803	55.8442	57.8634	74.5605	60.314	41.2374
mt-Co3	47.3991	48.2713	47.1994	50.6026	41.3911	44.1459	37.6204	38.9825	65.2298
Stmn2	42.4831	32.6552	1.30657	58.8849	46.6766	44.876	44.9252	78.9974	24.8755
mt-Nd1	39.8528	35.6597	37.8324	47.4301	32.5884	30.739	33.4348	30.2034	38.0793
Rpl41	38.4802	29.4933	63.8783	36.3627	36.5893	30.551	37.0845	29.5993	28.9833
Hspa8	38.3318	20.8386	16.2633	16.7138	27.594	21.7015	23.9624	24.2487	39.0677
Tubb3	38.2716	51.1775	2.12729	45.817	58.6224	51.2716	61.6652	75.7871	29.4283
Hsp90ab1	37.8314	25.7107	23.7647	25.1402	29.1842	23.5653	35.8754	26.0771	38.1068
Ubb	36.3759	45.9063	27.2453	35.4969	39.1535	42.5473	36.5374	49.2749	48.2514
Rpl32	35.806	23.7234	41.0422	26.8268	25.6973	25.0723	28.1147	19.4399	25.6666
Ppia	34.3338	28.0586	56.4316	45.1005	37.4615	38.6448	43.1213	46.2453	18.8326
mt-Co1	32.4258	33.33	28.6612	38.6124	28.8332	32.0475	28.7484	29.4023	45.5716
Rpl13a	32.1241	30.7719	40.5857	31.2125	28.8051	29.0079	31.9829	21.6246	34.3035
mt-Cytb	31.4139	31.8623	28.8482	37.7661	26.5389	26.5216	25.1914	24.0255	35.965
Rps27a	29.501	20.824	39.2818	25.3916	23.1677	23.7746	26.0605	17.1353	24.4883
Rpl10	29.0764	23.7342	38.5353	28.0621	27.8042	25.1844	28.4593	22.7432	18.1131
mt-Co2	28.9831	30.3404	26.833	34.2033	25.1058	25.9349	25.0789	23.3415	35.8797
Rps8	28.8784	22.0312	41.2287	26.5318	25.1457	23.8121	23.7183	19.7855	22.027
Rps18	28.8156	18.8537	39.1275	21.9028	20.9841	20.784	23.0713	15.3488	19.949
Rps2	28.8098	14.1101	40.92	18.0646	20.1964	16.9464	22.8184	13.2298	16.1403
Rpl13	28.4831	20.4921	47.2634	23.6992	23.1225	22.3971	23.1201	16.3669	21.1511
Rps3a1	27.9628	18.708	34.0243	18.8063	19.65	19.8297	22.7676	14.8661	22.1525
Rpl11	27.7577	19.9509	30.7307	20.1507	20.1179	19.0678	20.1571	15.9641	21.9004
H3f3a	27.5867	48.4934	25.3408	31.2855	33.6458	36.4117	32.9167	32.8912	42.775
Rps19	27.4641	19.2313	38.6414	24.7685	22.8195	20.7114	24.9176	14.8532	27.4023
Rps3	27.1624	20.1872	29.0813	20.1583	20.3275	19.1023	23.8517	16.7773	20.9568
Rps14	26.8555	23.9278	37.3977	21.0025	23.6134	21.8959	24.2283	17.3287	36.0652
Rtn1	26.4199	26.9291	4.2715	32.852	23.7445	27.795	24.2226	32.5407	21.053
Rps4x	26.3417	21.782	37.6149	22.7416	24.5897	20.8545	26.8615	19.0137	28.4622
Rpl8	26.2034	17.7154	32.626	17.8473	20.124	17.4354	20.3993	13.7737	20.6349
Gapdh	25.9173	18.6758	21.9083	22.9527	18.7984	17.7113	19.606	19.1598	14.821
Eef2	25.7539	24.8529	9.74953	20.9381	20.197	15.8068	19.6215	17.3022	24.5766
Rpl14	25.3963	16.9801	34.8805	23.229	20.982	19.012	22.8246	16.8141	18.6103
Rps5	25.3409	21.1039	36.2171	23.9748	21.8146	22.3791	24.4062	17.7319	22.4243
Rpl9	25.2322	19.8995	32.1554	21.09	20.2778	19.9575	22.579	17.0694	21.7428
Rpl21	25.2159	19.6432	32.4311	22.3216	20.8702	21.6048	22.1122	17.1505	18.8518
Rps23	25.1744	20.5605	37.1305	22.0033	22.1049	21.2637	26.0222	15.826	22.9411
Hbb-y	25.1719	25.2583	24.181	21.6867	24.3272	25.5548	22.272	20.601	33.4378
Rps7	24.9282	21.1994	28.6241	21.286	19.7757	19.8702	21.6752	17.74	24.2312
Rpl23	24.6916	20.8449	33.0452	22.8611	21.2831	21.3378	22.816	17.5515	22.1276
Rps11	24.5935	20.2916	32.3678	19.5867	20.8071	22.4512	20.8805	14.4928	22.4893
Rpl3	24.5714	15.1296	26.5337	17.3195	17.4672	16.9407	20.0121	12.5877	15.6383
Marcksl1	24.3161	28.2869	17.6502	24.7192	23.4398	23.301	22.0359	24.8539	32.1082
Map1b	24.1783	26.6235	4.10769	26.8398	28.4561	40.9727	31.8761	49.2958	21.1925
Rpl6	24.001	18.6726	24.7917	19.3482	19.2497	18.618	19.4859	15.8234	17.4281
Pomc	23.9291	1.03996	0.638531	1.013	0.959628	0.877379	0.845526	0.891777	3.88999
Tpt1	23.9121	24.2171	33.7358	22.1649	29.6756	23.5388	26.7402	21.8392	33.5428
Rps24	23.8401	20.1572	30.8884	25.9148	21.4007	20.2547	21.6691	18.5512	21.082
Rpl26	23.5301	19.5038	29.1844	20.7886	19.4644	18.5902	20.2051	16.1459	19.673
Rps6	23.5134	19.4243	27.8055	19.4962	19.9967	19.1823	19.4753	15.0874	20.7633
Rps15a	23.217	19.5941	36.7355	19.0878	20.6223	18.9477	22.141	15.0343	25.4843
Rpl17	23.1555	19.3184	30.4633	20.8174	19.6034	18.6292	19.4523	15.4378	20.6625
Rplp0	22.8456	20.6059	33.7769	22.5576	20.9166	21.5796	24.5588	13.8267	20.8181
Rpl19	22.4496	16.4088	27.5081	20.3829	17.6288	17.9793	19.1591	14.7741	18.4471
Rpl37a	22.3681	18.7028	30.5123	19.7793	19.8559	17.0876	20.5036	15.5856	22.1844
Rpl18a	22.2216	22.642	32.6103	22.3402	21.988	22.1435	22.5842	14.8882	23.0605
Cfl1	22.1314	25.464	21.9747	26.0749	26.1416	27.2564	20.2793	25.6942	21.1869
Rpl38	21.5997	12.7489	20.4975	16.1407	13.6182	13.8454	14.6741	12.4891	13.3962
Ybx1	21.5493	15.6892	20.0077	17.4663	17.8115	14.4116	17.2297	18.1999	14.5962
Rps9	21.4423	17.1229	28.0687	19.341	18.2326	17.6464	19.9427	14.152	21.2436
Eif1	21.0489	19.7998	18.0079	18.3654	19.7891	21.208	21.8775	20.8046	23.6556
Rpl37	20.3138	16.4227	22.9348	17.5716	15.8747	15.7452	18.2796	13.0281	19.024
Rps29	20.2416	18.4676	37.1215	20.2707	21.0882	20.2086	20.5592	15.6745	23.8182
Calm2	20.1636	16.7043	8.26939	18.8368	16.0638	18.6501	21.916	14.3622	15.7349
Meg3	20.119	20.0944	12.1402	31.4055	20.189	20.1453	10.3946	21.4484	98.2537
Rpl39	19.858	16.5294	32.1088	19.4053	18.3805	16.3052	21.2042	15.2389	16.1965
Rpl4	19.8027	15.7074	22.7947	16.641	16.0396	15.2885	17.4802	12.3543	16.4708
Rps16	19.765	14.7388	31.1025	16.8813	16.1163	17.0152	17.4313	11.5926	16.8941
Rplp2	19.6874	14.4794	27.9519	16.9842	16.5452	16.0368	17.6037	11.5404	17.4703
Sox11	19.5598	23.782	2.96925	15.9046	13.7081	20.5379	18.1851	24.017	22.9115
mt-Nd4	19.3596	19.3776	17.9002	22.7506	16.288	16.8082	16.3894	15.0802	20.9313
Rpl29	19.3021	15.5878	19.0107	15.3722	15.4365	14.2496	14.748	13.0058	16.2599
Gnas	19.2647	19.3278	22.2699	15.6948	19.0926	16.8177	16.15	17.6609	18.9021
Eef1g	18.9877	13.685	14.6641	14.0245	13.9668	11.4931	12.6681	11.9821	18.1358
Rps17	18.7563	14.1509	24.274	14.7413	14.455	14.4155	15.4379	12.4323	17.1071
H3f3b	18.6454	37.3944	20.5452	20.1635	22.9914	29.297	21.512	23.5935	38.315
Rplp1	18.6321	12.0419	34.0562	18.3454	15.9179	15.0486	17.9105	10.7386	9.69097
Rpl7	18.5709	19.2406	28.0844	17.4042	18.5921	17.4261	19.9639	13.5974	17.933
Rps10	18.2092	13.4581	21.9726	14.2633	14.2449	13.5552	14.456	10.5964	18.0203
Rpl31	17.807	13.8148	20.3765	14.7124	14.0558	12.4581	13.9103	11.9205	15.931
Fau	17.588	16.3071	23.6731	18.1702	16.5848	17.004	18.5966	13.4104	18.3598
Rpl24	17.519	15.84	23.1451	14.9854	15.9587	14.8336	15.6039	12.2907	17.5099
Rps27	17.4083	17.2784	26.5841	13.9063	15.7948	14.6209	16.5139	10.9201	23.1637
Rpl27a	17.3767	11.915	23.5085	14.4589	13.8358	13.8457	14.7624	9.72963	13.9842
Rpl10a	17.3174	9.07371	22.8381	14.2581	13.0662	12.5944	14.886	9.65001	9.99249
Rpl34	16.9703	13.3937	20.5719	11.6013	17.0933	14.0309	13.5478	13.4137	15.3771
Rps13	16.8013	14.0113	22.8661	15.2968	14.4449	14.9875	15.2253	11.6382	15.0852
Rpsa	16.7693	12.1245	26.9586	14.2563	14.5188	14.3004	16.8366	10.6898	13.7553
Sepw1	16.7155	11.1765	10.0497	24.1893	18.4945	13.7369	20.9409	20.4731	13.0177
Rpl36	16.3758	11.1458	16.6933	12.0237	10.7054	10.6065	10.1039	8.68102	12.02
Rps26	16.3132	12.2511	17.7282	14.3246	10.9247	11.3775	12.1239	9.00557	11.6833
Stmn3	16.1799	14.6754	0.678082	26.3146	18.864	15.9951	16.0597	23.0965	10.3564
Mif	16.0134	7.60981	9.00377	17.7593	7.62708	10.9671	10.817	8.00152	4.70046
Rps15	15.854	12.4119	24.7	13.9962	14.3712	13.4995	13.2714	11.3346	16.2624
Eif4a1	15.7209	12.7869	9.07336	11.87	12.236	14.4196	13.9439	15.2395	13.925
Mllt11	15.5569	12.9462	0.695836	21.3063	14.9142	15.4827	14.0556	18.1914	9.10021
Rpl18	15.4811	12.2504	19.7186	12.9743	12.5979	11.8576	13.0735	9.31767	12.2835
Ina	15.191	26.5476	0.920834	26.5239	19.065	21.1543	12.2944	27.1166	13.6311
Fabp5	15.1702	8.98046	12.4133	11.6649	11.5373	11.2717	13.9974	15.8443	5.22792
Rpl35	15.0767	11.1724	17.4965	12.6217	11.4528	11.0874	13.1665	10.092	9.07442
Hnrnpa1	15.0645	16.3067	11.598	11.8777	12.4863	12.6595	14.2522	11.2285	19.5641
Rpl35a	15.0289	12.7958	23.2587	12.6463	14.4651	13.1258	11.9549	9.64182	17.9062
Slc25a4	14.9134	11.878	14.2571	18.2721	13.9608	12.2564	16.9788	17.5013	8.58676
Cd24a	14.7607	27.7706	4.80746	21.4425	19.3113	23.5823	20.0167	22.5438	21.7264
Rps12	14.2925	9.39802	21.6849	12.1666	11.1986	10.8275	12.9859	8.08544	9.8444
Rps25	14.2418	8.85485	18.3935	11.105	10.6542	11.0439	10.9336	8.00787	12.1842
Pfn2	13.9589	8.08538	1.97462	11.8261	9.46939	7.91514	3.62868	25.505	9.78716
Rps28	13.7788	11.9534	17.8886	12.2286	11.5549	11.2131	13.2495	8.29967	13.3746
Slc25a5	13.7779	7.22616	8.00524	6.47634	5.41623	6.37677	6.64096	4.45756	12.7524
Hn1	13.7716	11.5264	7.81888	15.1849	12.1281	13.6609	9.54511	16.1612	16.9859
Pfn1	13.5986	6.80146	22.0685	10.0307	10.5485	12.1976	11.3616	8.47304	7.8156
Rpl7a	13.5146	12.3319	14.3691	11.3448	10.7793	11.6518	11.7727	9.31366	10.9144
Prdx2	13.4979	20.271	9.29246	18.4061	14.1911	14.7423	16.5408	18.9188	17.5304
Rps20	13.4828	10.2094	27.6391	12.5783	13.0963	11.5792	13.7747	9.21115	11.9926
Gap43	13.3475	13.6284	2.45262	36.7824	27.2245	20.6628	18.1877	32.701	2.71436
Chchd2	13.1477	11.9349	11.7477	14.6015	11.8757	12.1567	14.0999	11.4027	13.3892
Ywhae	13.1226	15.395	9.83101	13.9907	15.5718	15.9397	13.7439	18.0371	14.8076
Eif5a	12.83	7.78141	13.2564	10.9311	10.0924	10.675	12.5779	9.93086	7.52089
Naca	12.8093	10.7609	16.6827	10.3937	11.5654	11.4996	11.7956	9.13569	12.5875
Sumo2	12.7851	14.1556	16.6852	12.4066	17.2499	13.1303	15.5513	16.1367	12.1149
Basp1	12.6012	19.3989	5.16509	22.1173	17.2522	14.6145	22.0456	20.8602	7.78597
Cox4i1	12.4852	13.9994	12.7005	18.7931	12.9467	13.3243	13.9005	14.6778	11.9411
Npm1	12.4358	8.54368	19.9525	7.62351	9.32979	10.4861	11.805	7.83679	10.7778
Calm1	12.4335	12.5744	12.588	14.3609	14.8157	11.8184	20.4482	19.9404	7.9346
Pcsk1n	12.2131	7.68586	0.310374	9.76407	6.16588	7.95783	2.7165	7.08195	7.21649
Pebp1	12.1618	11.7481	7.6794	12.6463	10.042	10.8741	10.078	11.4194	9.75244
Pkm	12.153	14.6152	6.26069	8.18041	9.20071	9.38061	11.4683	8.67447	14.8941
Rpl28	12.109	11.8514	23.5971	11.6828	12.1915	12.1557	12.5181	9.13059	12.1856
Ywhaq	11.871	12.0142	8.05817	17.4702	12.5431	13.1521	10.7611	15.7885	9.68629
Fth1	11.8685	10.6959	22.6801	14.0661	12.8167	26.2744	11.2776	11.9906	10.2447
Rpl12	11.7316	5.8535	18.2746	8.16859	8.61726	7.98761	9.41897	6.04505	6.04077
Vim	11.6006	2.4522	14.6313	4.42782	8.58812	2.80473	22.7552	13.3725	5.56678
Gnb2	11.4867	9.79598	5.95587	8.86414	11.1548	10.1715	7.01276	8.63502	11.3217
Ptov1	11.3734	8.48068	5.58488	7.18201	8.89323	8.23141	7.65687	8.50756	12.7354
Btf3	11.3414	8.56862	15.3469	9.34106	8.59856	10.8007	10.4079	8.50623	9.54923
Dpysl2	11.2805	7.92003	2.29195	8.75341	8.85826	7.85904	6.88447	10.7522	5.6131
Atpif1	11.1991	10.3296	8.66485	13.8632	10.7184	11.8297	11.3219	12.3229	8.46667
Rpl23a	11.1043	10.8737	17.5986	11.3488	11.8361	10.9102	10.8953	8.25805	10.3272
Atp5b	10.7509	12.397	8.51938	11.4857	10.1212	11.3662	11.4652	10.9626	8.48962
Calm3	10.6316	7.04102	5.43002	10.3613	9.91738	8.56546	7.07733	10.5105	5.99944
Dynll1	10.565	9.75239	16.0108	15.3892	14.2694	12.1863	13.0494	14.5922	12.4744
Gnb1	10.486	6.86309	4.71418	7.34641	8.33843	7.06474	7.03291	7.06988	6.60028
Hsp90aa1	10.4047	14.1773	6.21278	11.8939	12.4434	13.3142	12.3827	14.78	8.39604
Ttc3	10.1335	9.22386	3.84323	7.07751	8.40417	6.48865	6.86458	7.13795	10.5765
Rpl22l1	10.1039	3.1232	12.355	5.10738	5.96949	6.16857	6.39247	3.94991	4.41641
Nme1	9.98959	8.09442	5.82794	10.7544	6.53998	9.5793	6.91351	9.44677	4.57806
Cdkn1c	9.98365	6.6626	7.63713	4.81102	6.84782	6.47836	6.77545	7.12457	17.6132
Eif4g2	9.86819	10.0429	5.90454	7.28396	9.26454	7.78335	8.87531	9.39707	11.8011
Oaz1	9.81799	9.49934	13.5979	8.50009	10.4461	10.4069	10.8857	8.2134	12.8648
Fkbp1a	9.75471	5.67068	6.69264	9.40535	8.33408	8.10224	12.3615	9.57265	5.48007
Ptms	9.71836	12.921	5.74986	10.7869	12.4939	12.0589	8.72375	11.4078	11.0556
Cox8a	9.64706	8.73093	8.17994	10.722	7.97292	7.25541	8.61049	7.51216	6.79716
Gnb2l1	9.58516	8.0205	11.3069	7.37094	7.71862	7.79026	8.44275	6.61262	7.36558
Uchl1	9.54912	7.59531	1.15507	18.4653	11.2425	9.18653	12.4601	23.7184	6.1648
Ran	9.38163	6.82643	15.1877	7.59502	8.19152	8.725	7.42948	7.39122	6.95082
Dpysl3	9.36677	8.21597	0.578797	7.33311	8.39471	6.79621	5.28111	10.9001	5.76406
mt-Nd2	9.32418	9.19746	9.40439	11.3732	8.16839	8.01605	8.132	7.47914	10.4931
Ngfrap1	9.11268	8.54802	7.51442	9.49031	8.08162	7.96711	7.2768	9.59704	12.7345
Hint1	9.08256	6.33842	8.60066	9.38205	8.08269	8.62763	6.2677	7.33813	4.85139
Rpl30	9.04149	7.47397	12.1666	7.69024	7.41368	7.10532	7.9403	5.68911	8.44061
Aldoa	9.03539	5.65743	4.35763	8.43547	7.11542	6.88225	10.2518	7.1765	3.62562
Ndn	8.94232	8.5825	1.89492	10.6525	6.33605	11.3908	3.22938	11.9309	19.5611
H2afz	8.91279	10.0502	30.5984	7.98327	13.1126	10.6415	14.73	9.431	10.4006
Tuba1b	8.84287	7.29676	18.5419	9.98982	13.2672	10.104	12.4187	13.0987	6.3011
Rps21	8.79553	6.89298	11.7858	8.26187	7.13444	7.58301	7.52461	5.12584	6.55395
Eef1b2	8.76267	5.87151	9.93492	7.9915	7.39499	6.38886	7.18582	6.37264	7.47601
Gng5	8.6864	3.55683	12.4577	3.75023	5.90626	5.27019	5.26517	4.48622	7.57538
Tceb2	8.56462	7.33877	9.7519	9.55418	8.76646	7.92618	7.93578	8.78534	6.32637
Sox4	8.56321	13.4603	4.21813	4.39437	5.80043	6.81634	5.57628	7.32733	25.6549
Fscn1	8.55071	7.43976	5.30531	5.69503	7.6572	7.50873	9.56165	8.9557	9.41424
Ddx5	8.52365	10.8375	4.81304	6.05619	8.3697	8.03224	8.12266	7.69674	13.7758
Rpl36a	8.51674	7.0538	16.5004	8.18726	7.48773	7.12519	9.35047	5.99131	6.64074
Cox6b1	8.51206	8.13363	8.02878	12.4954	8.05848	7.52974	9.16792	9.38891	6.70569
Cox7c	8.51043	9.11618	7.68709	12.1149	7.63337	8.30773	8.22606	7.8036	7.77818
Mapt	8.24099	5.82188	0.513251	10.9748	8.54652	7.86114	6.47486	10.8244	0.956182
Sub1	8.20671	6.97141	8.03683	8.19919	7.29134	9.03149	8.57148	9.40319	8.5673
Rpl15	8.1678	6.06129	7.65517	6.90828	6.32383	6.19514	5.93132	5.37301	5.87608
Xist	8.14792	8.09578	7.45854	5.98767	9.42622	8.24946	10.0834	6.70053	10.8886
Hnrnpk	8.1347	11.1939	7.44767	7.44293	8.28545	10.4257	9.36761	9.11224	15.2574
Erh	8.12894	8.53035	10.6631	8.28478	8.60395	9.27557	8.30427	9.04487	8.19123
Rpl5	8.04953	6.98002	10.5794	6.71514	7.36691	7.31345	7.59776	5.97091	7.24833
Psma7	7.90114	7.57603	6.01064	6.76849	6.34793	7.81728	6.46674	7.9303	6.696
Crmp1	7.87944	12.1336	0.817753	6.48795	8.26665	6.33428	5.83302	7.51933	5.98413
Hmgb3	7.78623	7.50911	6.58228	5.24995	7.08999	6.17081	4.67132	6.52844	10.373
S100a10	7.75723	0.563942	5.52809	11.4782	3.5717	1.06232	10.5635	7.55744	1.86688
Atp6v1g1	7.69204	5.71917	3.07101	8.61255	6.46301	6.17796	7.38096	8.18849	8.94681
Sec61g	7.6821	6.06854	11.328	6.01739	6.26364	5.91846	6.59448	5.18091	6.21157
Hmgn1	7.56358	7.98051	18.5451	5.4111	10.2175	9.12948	11.2067	6.76063	12.5685
Eif3f	7.42628	8.52814	7.42184	6.72466	6.55753	6.13095	7.22325	5.57624	10.7983
Mtch1	7.39987	5.43194	3.55546	5.68828	6.53734	4.7347	6.01823	6.29533	5.20278
Atp5e	7.38916	6.28009	8.0438	8.19644	6.5904	6.27272	6.98109	6.09967	5.98259
Elavl3	7.30309	6.4912	0.300425	6.69472	6.54753	6.26859	7.35609	6.70103	9.5643
Rnf187	7.28955	8.36964	3.87668	7.97068	6.85871	7.39856	6.70858	8.7271	4.60517
Ncam1	7.27702	7.59772	0.92981	11.6501	5.25236	3.95886	4.01006	5.94954	2.14907
Cox6c	7.26012	7.13695	8.47817	9.2763	6.88676	6.37866	7.45158	7.17356	6.37596
Marcks	7.25392	9.03681	11.0621	6.22552	8.62602	8.44305	6.93919	7.93379	9.35417
Rpl27	7.24989	6.08136	7.72944	5.75882	6.18762	6.08249	6.50483	5.49015	6.96961
Nkx2-1	7.16019	0.0783928	0.102547	0.0640028	0.195398	0.0734614	0.143053	0.0372072	2.10398
Dnaja1	7.14969	8.90363	4.00124	6.33946	7.45201	7.84177	6.78259	9.12812	9.42198
Ppp1ca	7.04194	4.96547	6.74556	6.0411	6.54995	6.26394	5.45572	5.94619	5.34778
Morf4l1	7.0316	7.55212	5.9441	6.58919	7.26224	7.63239	3.28606	6.00827	7.70067
Tma7	6.93746	5.73053	6.65698	6.5511	6.02697	5.89354	5.46225	4.88453	5.9898
Srsf3	6.88956	6.12693	10.0199	6.1109	6.91	6.72862	8.40201	6.66478	8.24514
Gng3	6.85782	6.75752	0.308293	6.45876	8.85729	6.10292	8.379	8.85144	3.07819
Chchd10	6.84227	0.19838	0.151656	0.742731	0.23494	0.125543	0.25342	0.0815146	0.340244
Rpl36al	6.82046	4.36984	6.70998	5.57987	5.13568	5.41811	4.98003	4.38924	4.34685
Serf2	6.82009	6.8368	15.3253	7.75944	8.74319	7.50104	14.0812	6.83089	6.96519
Gm1673	6.80437	7.72634	2.62537	8.93165	8.28531	7.05975	5.31294	8.18548	5.26812
Bex2	6.75676	5.63536	0.910707	7.39846	6.54648	6.95893	5.05329	7.49984	11.0101
Ap2m1	6.74212	6.27279	4.69658	7.38589	7.43277	6.91528	6.34813	7.86568	5.3917
Selk	6.60951	5.72283	3.86499	7.25055	5.77734	5.73211	6.00427	6.14487	5.96984
Pcbp1	6.57564	5.29595	6.00614	3.91682	5.589	5.64332	5.09202	4.90378	6.71781
Snrpn	6.57187	5.58717	0.809297	7.88971	6.68236	5.60505	4.13559	6.78759	4.22891
Cdk4	6.56446	5.98105	9.80845	3.85068	5.70948	5.76578	6.93934	4.47449	12.3565
Cox5a	6.49812	9.9373	4.69465	16.9588	6.81792	7.92828	8.41895	10.6115	4.21746
Atp5j2	6.49745	5.76701	6.18425	7.95727	5.48982	5.76405	6.02126	6.08709	5.12116
Pgrmc1	6.47229	8.1377	4.06731	5.6128	4.82446	7.2857	2.68377	5.99907	7.39625
Cox6a1	6.47211	5.45533	4.81982	8.89859	6.07114	5.1386	6.22077	6.31386	4.00744
Nefl	6.42879	13.1122	0.851348	42.5635	12.6043	14.3648	41.4062	42.4241	0.885389
Atp5a1	6.42726	8.90536	5.56705	7.73687	6.29898	7.49649	7.38386	7.58006	5.36628
Cox7a2	6.40721	6.47114	4.93169	9.20452	6.08577	5.63806	6.62916	6.64969	5.02579
Hnrnpa2b1	6.34834	10.1365	6.21292	7.06355	7.3333	8.5692	7.46328	8.23062	7.90687
Atp5f1	6.33619	8.35859	5.65577	9.23044	6.87906	8.26562	8.406	8.41359	6.41555
Ranbp1	6.27003	4.51401	9.51005	6.28537	5.22144	6.28042	6.31068	5.23626	4.7658
Arf5	6.23511	5.01698	7.6811	5.67807	5.79937	4.89174	4.94091	6.16944	4.17569
Hist3h2ba	6.22001	10.3152	0.565725	5.97002	6.76917	9.12028	4.96397	6.65462	9.56003
Elavl4	6.19994	7.1172	0.341009	12.1619	5.3558	6.15658	11.7795	12.5716	3.83193
Tomm20	6.17511	3.84372	4.65888	4.97475	4.04675	4.84088	4.4182	4.13453	4.19986
Set	6.17088	4.80122	5.80095	4.07858	5.10527	5.19225	4.34546	4.33019	5.85675
Morf4l2	6.16883	4.37799	5.08984	3.95786	4.42763	4.74637	2.23134	3.79165	5.49933
Ndufa4	6.16872	7.8718	7.51804	9.39789	6.97965	7.27118	8.1391	7.72496	4.10995
Serbp1	6.15434	5.98127	7.50954	4.29818	5.42806	5.21522	6.1239	5.33244	4.96586
Arpc2	6.14089	3.21875	4.12075	4.20523	4.85098	5.20665	4.52706	4.86796	4.35563
Slc25a3	6.11167	6.3478	6.77662	6.39432	6.03521	6.29066	6.03463	6.51378	4.68943
Ldha	6.10409	2.94148	6.50494	4.60614	3.8246	4.20033	6.18869	3.10157	1.40375
Serf1	6.08371	5.05424	2.33561	8.54282	6.44802	4.94748	4.26234	6.19945	3.90016
Ywhah	6.05879	4.70182	4.38339	6.93883	7.29842	6.74674	8.88962	8.10078	4.73272
Atp5l	5.98995	6.0668	5.91406	7.8188	5.08622	5.52242	5.50655	5.82381	4.95787
Tecr	5.9768	6.49153	3.46216	8.27862	5.28785	5.91365	5.12363	8.2496	4.25663
Gabarap	5.97549	7.54649	8.23167	9.04736	9.58109	7.67914	7.87023	8.24425	6.83997
Atp5j	5.95324	5.41266	7.72413	6.44857	5.35427	4.76435	5.26112	5.0455	4.02879
Gsk3b	5.92049	5.59308	1.95381	5.36837	6.12309	4.85773	5.12736	5.93855	6.25864
Arpc5	5.91379	4.04061	2.74412	4.36717	4.86386	5.14006	3.4269	4.72727	4.31874
Akr1a1	5.90961	3.71181	5.93742	5.96239	4.48266	5.03528	5.86171	4.61228	5.15521
Ctbp1	5.89936	5.6887	3.35693	4.10918	5.90763	4.79934	4.7382	4.53137	6.3464
Ube2d3	5.89239	4.28205	5.76362	4.65982	5.34013	4.82129	5.64287	4.76111	7.8752
Tbca	5.86629	2.8137	4.94192	6.14586	4.17498	4.01319	5.1514	4.87703	11.3694
Bri3	5.84632	3.93665	2.91487	4.01563	3.92181	4.34092	3.411	3.51256	6.14895
Klc1	5.83953	6.69905	0.975756	6.54324	7.04379	5.99243	4.85702	7.52281	3.33318
Cox5b	5.83899	5.69765	5.0003	7.41836	4.86038	5.82728	5.34925	5.75032	3.49869
Ppp1r14b	5.8192	1.96135	3.81037	3.3055	3.0809	2.36913	3.89064	2.31859	4.95653
Hnrnpab	5.8138	5.75465	4.25479	4.1653	4.74038	5.35969	5.68104	4.731	5.80127
Hmgb1	5.80367	7.68584	22.584	7.8195	8.41084	7.3981	12.5689	6.12358	8.0392
Isl1	5.79734	0.277183	0.179063	8.4562	0.266499	0.200983	7.89437	9.22705	10.0497
Nsg1	5.76825	7.43623	1.19425	7.37135	5.22075	6.90408	5.08399	7.63685	5.66561
Cdc42	5.73247	5.8622	7.36021	7.43832	7.26944	7.68743	6.91349	7.70016	4.83641
Tagln3	5.72547	11.6018	0.518699	10.3678	8.05888	10.7803	10.4867	14.3983	9.16492
Atp5g2	5.66668	5.94902	10.2489	6.58553	6.75243	5.99219	6.68483	3.74668	4.8024
Pcbp4	5.64925	4.21101	1.96953	5.04851	5.02472	5.09228	10.3461	4.92633	5.05106
Atxn7l3b	5.64743	7.17472	3.20518	6.4536	5.65952	5.9383	6.15497	5.74585	6.33815
Uqcrh	5.61938	6.33183	6.73855	7.33422	5.61809	4.7679	6.01416	5.35852	6.64719
Rpl22	5.60908	5.28869	11.0523	5.17153	5.26649	4.94985	6.25699	4.21118	5.2003
Pcbp2	5.58685	5.33696	6.45967	4.13632	5.87626	4.70324	5.60284	4.37482	6.80885
Dynlrb1	5.56185	4.96424	3.93162	7.32053	5.6167	5.13511	5.64999	5.87043	4.71087
Arhgdia	5.55732	2.71151	4.48307	4.18024	3.9065	4.22612	5.26396	4.21382	3.17185
Atp5h	5.55701	6.89859	7.11375	8.61101	6.31231	7.21798	6.73756	6.80975	5.17717
Eno1	5.54646	2.35082	3.63221	3.8642	3.2152	3.24842	5.5183	4.08093	1.77005
Pafah1b3	5.54257	6.12857	1.69913	6.14001	5.47644	6.69017	3.7423	7.19307	5.31647
Gpx4	5.44097	5.805	5.95365	7.24791	6.71662	5.77103	5.79854	6.75814	5.11213
Sms	5.43189	2.88814	0.880165	6.24509	3.25506	3.05409	2.53804	8.22606	3.49509
Ptn	5.39732	1.18928	5.65562	0.771369	0.593281	0.897445	1.25717	0.661734	0.87858
Eif3h	5.38315	6.13945	6.23753	5.59064	5.45065	5.70973	5.21476	5.30464	5.67411
Rbm3	5.37764	4.72127	10.0112	3.89342	5.18431	5.5484	6.29788	4.71168	4.58747
6330403K07Rik	5.35935	6.71945	1.80327	7.46224	5.71211	5.92905	3.20198	6.71542	9.12863
Rab6a	5.32765	3.86389	1.93926	5.43868	5.065	4.14716	5.484	5.23174	3.21793
Hspe1	5.32328	2.56066	6.4797	3.78436	3.30735	3.57123	3.54921	2.4742	2.10616
Smdt1	5.31147	3.78921	3.48165	5.62411	4.48559	3.81595	4.35735	4.44318	3.62519
Arpc1a	5.21826	4.49686	2.87953	3.74721	4.05865	3.68956	3.77448	4.17742	4.85379
Atp5g1	5.20507	4.66519	5.05566	6.07579	4.38513	4.64461	4.50089	4.74167	3.12126
Rtn3	5.17468	5.73533	2.04596	6.25763	5.96281	5.56491	4.80728	6.25323	4.42984
Pfdn5	5.16114	6.01865	5.72118	5.81797	5.36091	5.33888	4.60678	4.80449	6.36338
2700060E02Rik	5.10483	4.72399	4.68545	4.50713	4.2184	4.00004	4.01752	2.86495	4.53268
Eif4a2	5.08195	4.57592	1.59908	4.8786	3.88901	4.12537	4.52405	4.5943	5.83329
Hbb-bh1	5.06941	4.92625	4.83187	3.98481	4.92746	5.02094	4.62894	4.13326	5.8426
Ywhab	5.05765	4.19074	4.22259	5.84838	5.52735	5.763	6.55346	6.51914	4.17519
Usmg5	5.03859	4.36497	3.63769	5.84406	3.92646	4.08724	4.18326	4.33384	3.94973
Tcp1	5.02605	4.46642	3.21975	3.97951	4.03126	4.43873	4.98865	4.43778	4.41039
Gdi2	5.01965	4.70993	3.61335	3.66821	4.10649	4.80367	3.37713	4.58299	4.68088
Evl	5.01535	4.16797	1.69916	5.26428	5.25959	4.03291	5.0281	5.26547	3.12737
Swi5	4.98976	4.41978	6.54775	6.57555	5.22319	4.80731	6.06055	5.71252	4.47216
Tmeff1	4.97982	5.086	0.689864	5.01349	4.07503	5.04115	4.10234	5.67665	3.41972
Tpi1	4.95447	3.21859	3.94516	6.00435	4.38621	4.68533	4.67716	4.85368	1.95709
Hba-x	4.91862	5.03653	5.06393	4.46992	4.91011	4.95423	4.48236	4.43929	6.88971
Rac3	4.90808	1.5741	1.19211	4.68061	4.10406	3.06417	2.50455	3.83457	0.864456
Srsf2	4.89737	4.05804	7.35839	3.95669	4.92661	5.06211	5.7869	4.27688	4.84198
Atp5c1	4.89711	4.9365	4.79753	5.55887	3.75868	4.39222	4.37079	4.89071	3.4538
Dstn	4.87495	4.93406	3.31615	5.50383	5.3873	5.80617	5.52562	5.60621	3.81293
Ckb	4.85801	8.99109	2.59238	9.18852	12.3242	9.21032	11.162	13.3327	6.05821
Cpe	4.8494	6.03636	0.509174	3.82268	3.98018	3.56155	2.19485	3.90376	5.1747
Ywhaz	4.8293	3.33095	2.1317	4.04081	4.56224	3.52033	3.97273	4.43812	3.8398
Ly6h	4.82135	3.31835	0.174361	4.84223	3.67168	4.25079	0.746371	4.73997	4.25151
Hba-a1	4.80138	4.9842	4.46675	3.99595	4.69532	4.86948	4.13395	4.02593	7.31066
2010107E04Rik	4.7675	4.32249	4.33992	5.98727	4.59738	3.76084	4.51413	4.18176	3.48966
Atp5g3	4.74927	5.24039	4.36643	7.51821	5.20137	5.02913	5.69531	5.34013	3.10634
Hdac2	4.74708	6.16939	2.19841	3.62949	4.37425	4.91754	4.42079	5.0662	5.38133
Ywhag	4.74361	4.41867	1.151	5.81174	5.582	4.98022	5.14668	6.8171	3.54583
Map1lc3b	4.7419	4.67123	2.11945	6.14831	5.35349	4.62608	7.98543	5.81851	3.76896
Cct4	4.72777	4.54409	3.12569	3.8621	4.08713	4.17076	4.87892	4.38594	3.30799
Rbx1	4.72742	4.92573	5.38836	5.53645	5.12499	5.76815	5.20264	5.25914	4.91886
Gdi1	4.72273	6.21814	0.814846	5.00042	6.0995	5.6288	4.62582	6.96985	4.68353
Anapc5	4.70129	3.74385	2.9751	3.93215	4.59699	3.28736	3.28974	4.30807	4.76406
Gpi1	4.67366	2.2294	2.01831	4.63326	3.98332	2.8046	4.51014	3.50124	2.77662
Prmt1	4.67337	6.35249	4.13467	4.95712	4.5375	7.14096	4.82489	6.10574	5.63297
Vapa	4.66695	3.39643	2.43886	3.63523	3.70073	4.17232	4.69943	3.68812	2.56308
D930028M14Rik	4.64242	4.86529	0.200443	5.93236	5.97315	2.88217	9.64112	5.40108	0.37696
Rbm39	4.62162	4.71851	4.73567	3.76506	4.42509	4.27875	4.73646	3.96546	7.36301
Maged1	4.61219	5.1291	1.91427	2.65984	3.96549	3.77762	3.15134	4.33215	7.6168
Gnai2	4.60663	1.66185	4.1367	1.6275	4.02413	3.02226	1.42967	2.15989	5.83751
Cct5	4.57907	4.66947	3.09498	4.02617	3.93013	4.67041	4.24734	5.04749	3.98822
Clta	4.57243	4.84695	4.92876	4.99932	4.27815	7.01132	4.55661	4.90754	4.68112
Txn1	4.56218	2.26192	8.75608	3.86718	3.90182	3.81315	3.49977	3.86051	3.38626
Ube2d2a	4.54073	4.18427	4.1721	4.16753	5.24728	4.74023	5.57565	4.34992	4.43031
Rnf7	4.53275	4.20855	3.84446	4.50542	4.59248	4.31731	4.63272	4.50396	4.06268
Pabpc1	4.52981	3.0574	6.71647	3.91359	4.41408	3.18268	4.3299	2.50035	3.80422
Islr2	4.49862	1.33446	0.407997	1.78995	5.21653	2.2077	0.868522	4.27616	0.691428
Shfm1	4.47812	3.20249	7.89168	4.14359	3.87483	4.28336	4.84409	4.16338	4.93938
Rala	4.46664	2.52206	2.0845	3.91945	3.29395	2.79474	3.62169	3.9523	2.63284
Hnrnpdl	4.43508	4.6405	4.16656	3.21929	4.25769	3.83341	3.37258	3.45128	4.73173
Calr	4.4257	3.85945	6.14287	3.28427	4.1224	3.45227	4.64878	3.93119	2.26469
Sumo1	4.41789	4.56568	4.5308	4.63768	4.15349	3.86031	4.66482	3.77636	5.48426
Nedd8	4.39048	4.42256	5.9586	5.68073	4.62244	4.40146	5.64502	4.33582	3.79376
H2afy	4.38486	3.71262	3.77145	3.12807	3.20466	3.51978	3.96509	2.90349	4.37307
Hmgcs1	4.38384	4.6864	1.50715	4.99118	6.17493	5.32081	2.91397	6.49541	1.9557
Ndufa7	4.37383	3.93304	3.89991	4.76582	3.86489	3.97096	3.7866	3.79448	4.41914
Srp14	4.36543	3.8079	2.26828	4.18061	3.80196	3.87276	3.51002	3.46135	3.71123
Arf4	4.35971	4.66823	4.07069	4.68824	4.13027	4.50272	4.23735	4.59192	4.79827
Zwint	4.35301	4.14701	2.78033	4.36817	5.1949	4.42467	4.24313	5.62094	3.83707
Rufy3	4.34996	4.98088	0.330632	4.76601	4.88733	4.03474	3.47879	5.56677	3.46851
Kif5c	4.33981	4.47759	0.310799	5.45083	3.83058	4.48163	4.64469	4.74505	5.27485
Vdac1	4.30806	3.77392	4.24277	4.8378	4.21871	3.92388	4.66244	5.04917	2.06494
Fkbp4	4.3059	4.2616	3.54342	2.9944	3.78583	3.72948	3.35919	3.86852	4.49427
Tubb2a	4.29043	9.45315	1.71241	6.80776	9.25984	10.2467	4.75559	12.1515	1.65304
Minos1	4.28398	3.55876	3.33944	4.9287	3.44055	3.74654	3.61442	3.63253	3.61185
Ube2n	4.28044	3.7667	3.65195	4.27034	4.19826	4.22663	4.23587	4.53827	3.49864
Atp5o	4.26544	5.06159	6.40141	7.75845	4.47135	5.44868	4.88424	6.03989	3.02431
Nedd4	4.25726	3.13037	4.29569	3.71236	4.0198	3.0035	3.75893	2.98807	4.89611
Prelid1	4.24734	2.46164	5.72364	3.67481	3.9943	3.17679	4.12452	3.15805	2.85555
Hsbp1	4.24319	4.3137	3.69409	5.26846	4.72379	4.46177	3.77394	5.07309	4.24922
Cct7	4.24144	4.77307	2.38671	3.52226	3.61149	4.85393	3.88057	4.7925	4.65136
Ubl5	4.23549	3.76501	3.68892	4.73282	3.63529	3.64318	4.42814	3.46897	3.65015
Sec61b	4.23052	2.49006	8.08761	3.58463	3.98589	3.33326	3.63926	3.04906	3.22865
Mlf2	4.22621	4.64426	3.91836	4.98796	4.63918	4.27028	4.59202	4.43786	3.87799
Cct2	4.22043	4.78225	2.1831	3.67181	3.37698	3.81093	4.22361	3.64704	3.3442
Psmb6	4.2203	4.94464	5.15775	5.34003	4.50329	5.65101	4.57234	5.5786	3.49688
Rtn4	4.2128	3.59121	3.88745	4.78843	4.5128	3.68001	4.54698	4.19328	5.96466
Six3	4.1985	0.0534052	0.0844579	0.0314066	0.168197	0.107	0.0811644	0.0930239	4.8033
Snrpe	4.19265	4.79568	6.29611	4.55976	4.56025	4.81044	5.34425	4.52669	4.84855
Psmb1	4.18947	4.82841	4.2854	5.29643	4.68077	5.41746	4.80445	5.34239	3.68823
Eif3e	4.16012	4.38116	3.67454	3.68092	3.59498	3.39089	4.09711	3.49188	3.75935
Vdac2	4.1563	3.66532	2.95384	4.27703	3.59097	4.09809	4.74254	4.0206	2.96102
Rab2a	4.14001	3.7332	2.83439	4.27931	4.09362	4.36248	4.08409	4.95491	3.99484
Wbp5	4.13387	5.45028	6.79624	2.21626	3.10856	3.46955	2.04247	2.94893	11.3929
Psma3	4.12858	4.60555	4.50523	4.78025	4.43077	5.21527	4.67049	5.65986	4.83135
Myl6	4.10875	3.87032	9.37131	5.7116	6.12532	5.59309	4.95155	5.13881	2.94131
Cycs	4.09563	3.1469	3.23793	4.50242	3.54001	3.74302	4.61186	3.90961	2.84655
Ube2s	4.09328	4.48471	7.59189	4.6876	5.49489	4.69313	7.08184	4.76046	5.29209
Glrx3	4.08758	3.50212	3.37174	3.77109	3.51982	3.60389	5.27078	4.57844	2.87299
Mpped2	4.07952	0.870641	1.49289	0.234315	0.591097	0.495431	0.699289	2.22529	3.53471
Gabarapl2	4.07813	4.54413	1.46205	4.93863	4.16835	4.31248	4.00849	4.67813	5.52349
Celf2	4.07679	2.39092	0.383164	0.59825	2.35586	2.30528	2.76563	0.863046	3.83545
Eif1b	4.05403	3.83124	2.73397	4.31936	3.37101	3.67201	3.16847	3.10579	3.94308
Jund	4.02532	3.39979	1.86156	3.96862	4.15431	3.56835	4.04024	3.58411	5.75227
Nono	4.00143	5.18633	3.74646	2.98532	3.69891	3.78709	4.02773	3.81858	5.85903
Csnk1e	3.99671	3.41155	0.730296	3.14451	3.30579	2.8548	3.09084	3.79649	4.01143
Cox7a2l	3.99433	6.09714	3.41028	5.83985	4.76677	4.50729	5.01675	4.89789	6.62444
Arf1	3.98517	4.63416	4.61923	4.60557	4.82532	4.9589	4.67653	4.7782	4.3306
Eif3k	3.98497	4.36991	5.29979	5.00728	3.95388	4.17369	4.51196	4.28249	3.33694
Raly	3.9846	3.07787	6.92599	2.94987	5.04574	3.83493	4.55617	4.40735	4.92743
Uqcrb	3.94814	3.70629	4.4117	4.83338	3.55025	3.98444	3.64906	4.03673	3.74706
Cnbp	3.94357	2.91348	6.24752	2.76577	3.38912	3.87154	3.35428	2.45129	3.25002
Atp5k	3.9423	4.00824	4.48065	5.04676	3.49076	3.54479	4.03146	3.65425	3.25757
Fxyd6	3.93609	2.73052	2.97682	3.92921	3.36711	3.22964	1.02462	2.8563	2.88988
Fdps	3.9322	2.86448	1.8538	5.30445	4.9142	4.27607	3.54436	5.6129	1.3498
Ppdpf	3.9109	1.90203	2.24107	2.55302	2.52567	2.11539	2.17804	2.01198	4.89871
Cirbp	3.90971	5.0459	1.02214	2.70947	2.69773	3.92251	1.88106	2.51518	5.83567
Ppp1cc	3.90937	3.728	4.40129	2.6283	3.74084	3.14382	3.36843	2.92895	4.69773
Pea15a	3.88544	0.917024	0.96812	1.12763	0.936948	0.968895	0.401278	0.817247	2.38695
Bex1	3.87673	1.33929	0.765544	2.78409	2.45374	2.26234	1.707	2.40755	2.24619
Cotl1	3.8757	4.19503	3.04854	6.09476	5.63875	5.99842	11.1084	5.84025	1.25034
Pdap1	3.86518	2.96656	3.16813	3.55641	3.1199	3.05314	4.04527	3.3574	2.74746
Atp5d	3.86499	3.72574	5.41133	5.95116	4.09607	4.34095	4.74586	4.32544	3.54474
Map1lc3a	3.86374	3.9277	2.72976	7.61203	5.73099	3.76305	6.64393	5.13218	2.44054
Prdx1	3.83289	1.09318	8.30005	3.03163	3.72676	5.08966	4.40959	3.46399	3.61993
Bsg	3.82323	3.98627	5.5952	5.84876	4.03651	3.98666	5.742	4.05716	3.55159
Ube2e1	3.8077	3.00641	1.63678	3.28787	3.03768	3.96877	2.75528	3.4329	3.04697
Uqcrq	3.80004	3.40882	3.71494	4.7328	3.50887	3.41383	3.25802	3.31196	3.43264
Cox7b	3.79699	3.85645	3.20943	6.05131	3.58581	3.50457	3.52995	3.97378	3.26259
Rnf5	3.79537	3.34702	0.933187	3.30975	3.51871	3.43208	2.72582	3.10083	4.16336
Pou2f2	3.68233	4.12579	0.0998288	0.431934	0.739389	0.348945	0.223152	0.128142	4.57512
Dctn2	3.68201	3.01058	1.77861	3.27275	3.42745	3.20392	3.79288	3.95933	3.27878
Ubc	3.6801	3.82291	1.57353	1.72249	3.64102	2.6204	2.06495	3.28481	4.26253
Ndufb5	3.66653	3.69735	3.90446	3.89602	3.00855	3.16615	3.04052	3.22408	4.08015
Ndufb7	3.6619	3.26428	2.67249	4.0047	2.8485	2.92966	2.74979	3.23729	3.32971
Sf3b6	3.6598	3.24347	3.08495	3.17064	3.23406	3.29374	3.20463	3.26526	4.31057
Cbx3	3.65767	4.04216	3.12447	3.01672	3.60062	3.30814	2.7849	2.7878	3.40612
Pgam1	3.65261	3.17656	4.8721	5.10354	3.08941	3.74515	4.30967	3.41669	1.88675
Eif5	3.65217	4.06326	3.44668	2.79737	4.06857	4.49382	3.57246	3.10233	4.28745
Ncl	3.63879	2.88154	4.2758	2.25584	2.61362	2.84881	3.41382	2.19443	2.53352
Aes	3.6381	3.28434	2.48972	2.8529	2.45987	1.34052	2.86494	3.37877	2.97133
Ap1s2	3.63639	0.839212	0.266535	1.30577	1.17485	1.50664	0.844223	0.925206	1.63066
Trappc4	3.63204	3.35836	1.45668	3.78926	3.2831	2.95721	3.36865	4.02018	2.96444
Sh3bgrl3	3.61647	2.54259	5.90346	4.57186	4.83633	3.77597	3.39995	3.58137	2.29339
Cct3	3.6152	3.25248	2.31287	2.74411	2.64567	3.55955	3.05992	3.03503	3.2039
Paip2	3.60239	6.47819	2.98168	5.68791	4.84514	5.15666	3.63363	4.5213	5.12206
Nefm	3.59432	11.7646	0.583808	27.7218	8.13341	10.1662	34.1732	21.4316	0.636657
Mrfap1	3.5836	2.95291	8.84308	3.44164	3.81163	3.15347	4.21391	3.02893	4.73237
Capzb	3.57454	3.18935	3.94645	3.62713	3.91086	3.93688	4.06024	3.89189	2.28353
Tsc22d1	3.57048	7.21049	6.28372	4.82845	6.48706	7.61329	4.0046	4.14607	5.39847
Pfdn2	3.56389	3.11923	2.14184	3.68269	3.19674	3.39233	3.02389	3.68105	3.07898
Phb2	3.55065	2.95206	3.80402	2.83091	2.94063	3.35723	2.7252	2.65213	3.17415
Zfp706	3.54731	2.31427	2.50854	2.64887	3.09185	2.68437	2.23839	2.57748	2.49035
Ndufb9	3.54619	4.11196	3.61747	4.93983	3.8778	3.97268	4.05282	3.8768	3.42231
Mdh2	3.54512	4.95279	3.08987	4.36363	3.64475	4.37484	4.59811	4.81645	3.02179
Peg3	3.49945	0.791163	3.35133	0.542897	0.757375	1.52944	0.675096	0.73239	6.9367
Vcp	3.49925	3.66413	2.74835	1.95999	3.60041	2.63785	2.96238	3.2674	3.29544
Dnajb6	3.47565	3.91453	1.65303	3.61103	3.36325	3.95669	3.12268	4.10709	3.62333
Rab14	3.4746	3.8293	2.2833	3.37833	3.03622	3.45863	3.13803	3.46238	4.65123
Aplp1	3.45662	5.4753	0.277803	3.14536	4.91332	4.77364	3.30757	5.02779	4.73654
Six6	3.45135	0.0626023	0.0496212	0.0163179	0.0995945	0.0515264	0.156892	0.0293507	6.74246
Uqcr11	3.44932	3.01928	3.41289	3.95808	2.99181	3.19852	3.53819	3.31432	3.02882
Hnrnpa3	3.44615	3.94373	5.40827	2.96638	3.598	3.55825	3.32359	3.61141	3.69336
Map2k2	3.43372	4.06909	2.90632	2.97142	3.52912	3.48761	3.42168	3.70164	4.48742
Cfl2	3.43075	3.14504	2.05414	4.35877	3.15664	2.6439	3.62527	3.40971	3.85612
Rab10	3.42996	2.58284	1.79481	3.1407	2.81177	2.38925	2.74975	3.28166	1.93466
Polr2m	3.42758	2.67894	4.07004	3.06405	3.12342	2.53668	2.54084	2.22428	4.00042
Arl2bp	3.42714	2.71999	1.98732	2.22945	3.4078	2.44074	2.59122	1.94199	3.80069
Ube2e3	3.41826	5.1792	3.23455	3.21062	8.34932	4.43661	5.12416	3.05469	5.28299
Tkt	3.40153	1.74712	2.48034	1.90626	2.55381	2.70235	2.13989	1.99913	1.41771
Edf1	3.39668	3.38327	3.57646	3.97548	2.99557	3.51468	3.90842	3.11795	3.34503
Actr3	3.38928	2.3792	2.3899	2.40937	2.75345	2.93474	2.67571	2.92993	2.42555
Atxn10	3.3874	4.47225	2.61389	3.81795	4.19986	4.1783	3.62178	4.63963	3.62538
Nop10	3.37854	1.85003	3.09692	3.26447	2.60373	3.05388	2.85707	2.10606	1.90925
Klf7	3.37464	1.87158	0.248549	3.53358	5.16456	2.47634	4.04611	4.90385	2.72479
Myeov2	3.37103	3.1559	2.12546	3.74169	3.28255	3.19795	3.04732	2.39334	2.95093
Nap1l1	3.36944	2.77562	6.91896	2.11561	3.29092	2.89178	2.9164	1.9409	3.85772
Mapre1	3.36615	3.34163	2.72235	3.48966	3.72278	3.84556	3.50012	3.97142	4.09907
Txndc17	3.36052	1.85903	3.19598	3.43285	2.96271	2.58888	3.02007	2.91611	2.25288
Tsg101	3.35606	3.68103	1.37946	3.21474	3.37061	3.19423	3.30615	3.84948	4.40991
Scd2	3.32982	2.20793	1.99568	3.6248	3.13125	2.18644	3.24084	3.09746	2.34439
Sbk1	3.31768	4.28609	0.458575	3.36456	3.13233	3.11604	3.30231	3.91634	3.83304
Nhlh2	3.31074	7.07967	0.149162	1.64417	5.15428	2.37888	3.63624	4.46166	0
Ddah2	3.29261	7.45707	5.17009	7.05884	8.82512	8.90361	8.27584	8.38503	4.71082
Cct8	3.28937	3.56513	2.31334	2.88712	2.87262	3.86187	3.12599	3.50534	2.87675
Ndufa2	3.28826	3.11642	5.05153	3.77826	3.79764	3.32191	2.66541	3.06639	3.00161
Khdrbs1	3.28618	3.92752	2.47182	2.07045	3.42043	2.74017	3.51336	3.60722	2.55492
Snrpg	3.27318	2.78081	5.28609	2.07579	3.19775	2.95438	3.08571	2.20466	3.94641
Uqcc2	3.25862	2.62485	3.67614	3.15288	3.19165	3.25984	2.3516	3.29895	1.17649
Rab3a	3.25239	4.07796	0.206099	4.36667	2.64244	3.05062	2.07909	3.78417	1.84917
Ndufs5	3.24358	3.02232	3.03616	4.5466	3.25833	3.27419	3.69648	3.53724	2.77855
Psmb7	3.21159	3.86948	2.88391	3.62871	3.72778	3.99022	4.08772	4.37699	2.90062
Ap2s1	3.20438	3.36977	3.577	4.45635	3.51944	3.64463	2.05208	3.55983	2.84136
Rps27l	3.19725	1.68302	6.55024	2.4131	2.71212	2.62867	4.0229	2.11299	2.42883
Ndufb8	3.18942	3.53847	3.62571	5.58214	4.08031	4.26417	4.41298	4.46537	2.21278
Carhsp1	3.18845	3.32178	0.911508	3.08853	2.49246	2.57314	2.65709	2.94471	3.88983
Sep15	3.18623	2.67615	4.60665	2.98504	2.59043	2.50047	2.36226	2.27182	2.78104
Snrpd2	3.18491	2.9444	5.45568	3.37003	3.33994	3.65082	2.76882	2.96355	2.24979
Fkbp3	3.17874	3.37043	3.98848	3.72516	3.55134	3.83616	3.06081	3.43587	2.50397
Gng2	3.16556	2.4931	1.74259	4.49283	3.05536	2.71037	2.86757	3.88155	2.64989
Timm13	3.1522	2.64218	3.47808	3.44145	3.45051	3.21885	3.11284	2.82868	3.09954
Ndufv3	3.145	2.60867	1.80546	4.70769	2.63755	2.61507	3.02405	2.7248	2.48312
Sdhb	3.13954	2.60713	2.85013	3.36143	2.69005	3.08744	3.01314	2.99365	2.1099
Polr1d	3.13829	1.97926	2.80017	2.46698	2.49591	2.75316	2.0246	1.84824	2.13906
Sfpq	3.1359	4.08406	2.41421	1.87217	2.82495	2.36226	3.05519	2.47955	3.2918
Snhg11	3.12379	8.00204	0.812424	12.1806	7.12017	6.89694	3.28835	9.2037	1.36784
Park7	3.12296	2.55372	2.85793	3.54342	2.97433	3.07664	2.94914	2.65241	2.24428
Atp6v1f	3.11765	3.09619	1.58453	3.36941	2.74416	3.20193	2.21605	2.88664	3.14887
Tspan3	3.10509	4.64532	2.91859	4.424	3.78794	4.38098	4.25019	4.28029	4.6235
Brk1	3.104	2.78043	3.41109	3.34664	2.90988	3.26056	3.35201	3.11256	2.78584
Hba-a2	3.09544	2.79887	3.1753	2.6495	3.13703	2.99521	2.47115	2.58394	2.93024
Acot7	3.0952	2.48904	0.336015	5.52624	3.05699	2.70932	2.95285	4.83728	0.587746
Fkbp8	3.08482	2.81774	2.63165	2.72303	2.92965	2.664	2.70489	3.16847	3.08272
Myl12b	3.08162	3.00806	1.52272	3.45816	2.42944	2.91956	2.0703	3.49864	2.21646
Arpc3	3.07885	3.41959	3.14674	3.83241	3.66061	4.42469	3.50602	4.66336	2.81235
Caprin1	3.07659	3.47722	1.98611	2.08435	3.0163	2.26914	2.91141	2.54118	5.14082
Bax	3.07351	3.12832	2.56804	2.77137	2.91739	3.06798	3.26787	3.38311	3.17284
Bag1	3.0684	1.99374	2.29386	2.56731	2.42488	2.1776	2.30082	2.411	2.34814
Strap	3.05883	2.58775	2.69612	1.95652	2.2359	2.55052	2.18603	1.82661	3.28058
Rab11b	3.05387	4.03421	2.52499	3.19529	3.09741	3.31317	2.47674	3.41437	4.61702
Xpr1	3.05023	1.97277	0.255848	1.63231	2.5011	2.1598	0.65602	2.52096	1.1814
Stmn4	3.04958	2.66637	0.286653	7.25142	5.20345	5.49339	6.45441	9.69852	2.69549
Psmb3	3.04668	3.0871	3.41031	3.39894	3.12529	3.93045	4.48104	3.60644	2.59733
Uqcrfs1	3.04102	3.53213	2.08169	3.11749	3.00157	3.07844	2.92766	3.3377	2.72761
Matr3	3.0354	3.28793	1.28524	2.158	2.38795	1.92292	2.11217	2.19696	2.21937
Dazap1	3.03327	2.12617	2.1405	2.00246	2.74901	2.42135	3.54949	2.70366	1.93836
Fez1	3.02675	3.97308	0.359651	2.71315	2.81253	3.71921	0.859909	2.85134	3.50192
Fis1	3.02239	3.90995	2.91122	4.37666	3.86335	3.59828	3.80283	3.9951	3.94108
Psma4	3.01978	3.5277	4.06092	2.78442	3.46886	3.98026	2.95294	2.80558	3.23476
Crabp2	3.00684	21.1143	0.400937	2.04013	9.02816	9.4399	0.946729	8.11994	2.74656
Npdc1	3.00613	3.02053	0.404478	3.00557	2.38669	2.47912	2.4914	2.98948	2.81427
Calb1	3.00186	0.0743132	0.0614119	0.0233859	1.36559	0.0156803	0.185355	0.070491	0.622516
Mrpl34	2.99632	3.07678	1.04006	3.35808	3.09146	3.10016	2.67047	3.00682	2.76632
Hspd1	2.99531	1.92847	2.23816	1.90455	1.99739	2.47034	2.21505	1.9782	2.00461
Pdia3	2.97666	2.18639	3.79411	1.84802	1.9852	2.51332	2.6177	2.20768	2.2776
Hnrnph1	2.97199	3.33774	2.18187	2.69824	3.03186	2.92351	3.53289	3.16129	3.77752
Psmb2	2.96489	3.15932	3.8848	3.4713	3.11181	3.77922	3.57771	3.39184	2.72626
Hnrnpf	2.94908	2.06216	5.81383	1.53398	2.40756	2.79402	2.4616	2.08921	4.61674
Pomp	2.94802	3.39693	3.69486	3.73349	2.99757	3.00979	3.50746	3.50265	2.49652
Eid1	2.94716	2.63615	2.65964	3.83428	3.1092	2.73619	3.10173	3.66575	1.88593
Snrpb	2.94319	2.92467	5.91746	2.02665	2.99501	3.23373	3.70602	2.14853	3.82702
Tomm22	2.94233	3.00981	2.98473	2.81156	2.66921	2.84805	2.95757	2.88196	3.44169
Mrpl20	2.92929	2.27504	2.27925	2.99459	2.69492	2.61439	2.52695	2.63774	2.23103
2310036O22Rik	2.92858	3.1784	2.95616	3.043	3.10332	2.96609	2.94713	2.93395	3.02879
Rbfox2	2.92643	3.18294	0.955565	2.38333	2.18921	2.52465	3.73635	3.87111	2.68192
Ndufa3	2.92321	2.83287	3.49882	3.42041	2.9245	2.53487	2.54176	2.57342	2.11372
Uba1	2.91811	3.09186	1.24092	1.31079	2.98355	1.87384	2.76613	2.23054	2.11778
H2afy2	2.91576	4.04714	4.02554	2.46032	2.71828	3.39966	2.75141	2.97946	4.77203
Snrpd1	2.91323	2.82948	4.45697	2.81323	2.71153	3.10603	3.33957	2.86853	1.73505
Reep5	2.90601	1.63248	3.5457	2.89834	2.59584	2.186	2.55884	2.85011	1.58368
Sox14	2.89723	0.0860019	0.0131893	0.0184359	0.0675537	0.0887429	0.0460428	0.00670615	0.138259
Rsrp1	2.89526	2.67763	1.62594	2.55466	2.97353	2.99864	2.755	2.33661	5.45155
Ndufc1	2.89391	3.07888	2.82111	3.67501	2.93948	2.69217	2.4356	2.92737	2.40412
Dbn1	2.8899	4.78984	1.60319	2.14354	3.30918	3.06748	3.47397	3.31577	5.69539
Dynll2	2.88838	3.29399	1.16451	3.35012	2.70725	3.0752	2.95316	2.41987	2.96883
Mapk3	2.88606	0.740704	0.49636	1.67725	1.17856	1.11996	0.982794	1.31008	1.6784
1110004F10Rik	2.88269	3.14456	2.99339	2.91589	3.30901	3.16215	3.21056	3.5111	3.37796
Igfbpl1	2.87996	5.02901	0.30583	0.385807	2.01551	12.0498	2.35412	3.26799	3.83565
Coro1c	2.87918	1.68197	1.02548	1.43306	1.8943	1.74554	1.92128	2.29616	1.97305
Stard3nl	2.87741	1.55609	1.4989	2.40925	2.13833	1.85757	2.27669	1.97705	1.60604
Ldhb	2.87094	4.85031	1.2973	3.23271	2.25397	8.49889	1.20937	2.12037	3.47184
Atox1	2.86906	2.51284	2.52129	2.94436	2.53043	2.40942	2.30954	2.56181	1.63394
Nhp2l1	2.86679	2.30948	3.46004	2.76117	2.26392	2.48023	2.90756	2.46371	2.17008
Ube2b	2.83736	3.12281	1.79975	3.09778	2.95565	3.06454	3.58457	3.22281	4.93927
Cyb5a	2.83252	1.71852	2.95293	2.31808	2.85855	3.75614	3.8857	2.81551	1.39442
Tspan13	2.82978	4.19363	0.968129	3.81044	5.06084	4.51215	2.70483	3.59763	1.4229
Tspan17	2.82646	0.305437	0.276026	3.23244	0.88159	0.300501	0.744996	1.79266	0.86891
Smarce1	2.8244	3.31783	2.04789	1.67821	2.75647	2.88769	2.43928	2.07331	4.29821
Tmeff2	2.82117	1.21694	0.124747	3.00527	1.01894	1.22472	1.75706	2.87898	2.34635
Dda1	2.81315	2.18257	1.05247	2.51989	2.22698	2.14118	2.28713	2.22816	1.79271
Dlgap4	2.79903	2.69222	1.40162	1.96319	2.17629	2.39612	2.02453	2.28682	3.84195
Psip1	2.79756	3.44308	3.00206	2.08945	3.88579	3.41916	3.0657	2.70923	4.72136
Tmed2	2.78973	2.03492	4.1735	2.5456	2.44201	2.39269	2.427	1.93372	2.23724
Ndufa11	2.76201	2.94697	3.00293	3.70051	2.74482	2.7102	2.7898	2.91113	3.05841
Erp29	2.75191	1.86282	3.087	2.95965	2.92702	3.04048	2.3904	2.53296	3.11962
Tcf25	2.74914	2.42047	1.67217	2.258	2.75043	2.12055	3.08226	2.81041	2.2949
Tbcb	2.745	3.12319	2.47283	3.8988	3.044	3.24259	3.01734	4.092	2.45381
Idh1	2.73627	4.40033	0.883246	3.95071	4.24183	3.47615	2.70091	4.7184	2.06647
Son	2.73367	2.76434	2.49756	2.51342	2.43661	2.76259	2.33972	2.86346	3.24382
Dcx	2.73095	6.86403	0.286782	4.53579	3.41883	3.14072	4.05605	4.56198	2.54166
Eef1e1	2.72885	2.06312	0.581342	2.42497	1.95104	2.4935	1.5702	2.55155	1.41799
Pgls	2.7132	2.06426	3.18599	2.87917	2.62476	2.67368	2.52173	2.42549	1.79699
Nell2	2.70763	1.05525	0.0962636	1.05904	1.27591	1.09117	0.478479	0.416467	0.367568
Acat2	2.70277	3.4033	1.96659	3.31758	3.24556	2.96482	2.85408	4.24263	1.1329
Meis3	2.70268	2.10981	0.366931	2.07478	2.18273	1.98267	2.70295	3.24143	2.39918
Hnrnpu	2.69033	2.49068	2.29773	1.35674	2.2882	2.02032	2.39899	1.6927	3.26869
Ppp2r1a	2.69026	3.24639	1.1687	2.70663	2.64469	2.81513	2.02034	3.07438	2.60416
Srrm2	2.69025	3.25129	3.30672	2.66964	2.81425	3.24444	2.87278	2.71924	4.21367
D8Ertd738e	2.68786	2.19607	3.64392	2.76723	2.33246	1.93134	2.81939	2.34845	2.66099
Csnk1a1	2.68679	2.36917	2.5406	2.35876	2.49027	2.43615	2.00248	2.26682	3.76817
Dlk1	2.6747	0.864096	1.36536	0.853454	1.44022	5.8556	0.492429	0.455677	53.4462
Gpx1	2.67315	1.99321	2.85885	2.49423	2.07257	2.9895	2.01466	2.28094	2.03261
Mff	2.67054	2.79993	1.52427	2.6448	2.47062	2.51775	2.09079	2.46527	3.10455
Fdft1	2.67007	3.18208	0.966853	3.35147	3.4744	3.86557	2.20323	4.50756	1.56798
Ndufc2	2.65949	2.52131	3.02775	3.7034	2.7544	2.89491	3.27794	3.20411	2.46814
Psma2	2.65736	3.24599	2.88749	3.06397	2.90126	3.87493	3.04414	3.74039	2.68781
Aprt	2.656	0.770726	1.73933	2.60956	1.05095	1.7813	1.18148	1.7087	0.947498
Syt1	2.65273	0.799272	0.0784454	0.675961	0.661505	0.554755	0.490243	0.735059	3.23746
Trim35	2.65075	1.91088	0.925991	1.67758	1.91816	1.87554	1.28635	1.56271	3.42255
Npc2	2.65012	2.59396	3.68242	3.9637	3.01733	3.03096	2.36332	2.45169	3.83286
Btf3l4	2.64684	3.40723	2.03505	2.99578	2.45811	2.89219	2.82052	3.23002	3.5541
Higd1a	2.64381	2.30481	2.04407	4.0238	2.40647	2.18318	1.97052	1.92245	0.949433
Eif3i	2.64	2.5106	3.5705	2.28841	2.26672	2.72179	2.20407	1.83106	1.76545
Hnrnpc	2.63569	3.62678	3.72548	2.79729	2.95417	3.32629	3.26543	2.95448	4.14293
Prr13	2.62397	1.40041	0.573465	1.41459	1.42019	1.40198	1.23096	1.5962	2.24984
Svbp	2.62136	2.39021	2.23005	2.8685	2.40837	2.1832	1.42757	2.11334	1.94841
Ube3a	2.61536	2.10423	1.13237	2.07807	2.19187	1.86982	2.43749	2.05662	1.61279
Ndufab1	2.60508	2.92907	2.53351	3.61446	2.70671	3.18228	3.28928	3.28287	2.75049
Sqle	2.60395	2.03066	1.52375	1.79542	2.59627	1.96485	1.75516	2.68795	1.15917
Mrpl52	2.59131	2.22555	2.07602	2.41928	1.98093	2.11038	1.64569	1.6988	1.60438
Mgst3	2.58945	1.37354	0.689998	3.46283	2.00881	1.70506	1.2479	3.26115	0.80833
Cxx1a	2.58801	2.90469	1.01799	3.05208	2.31395	2.77244	2.14206	3.32218	3.37182
Hras	2.58544	1.60772	1.28345	2.5559	2.36876	2.10668	1.93012	2.07014	1.64901
Txn2	2.57983	1.89558	2.59264	1.99014	1.98741	1.60624	1.70659	1.62253	1.32529
Mapk8ip1	2.57356	1.84454	0.334042	1.70089	2.57072	1.78773	3.80311	2.2454	1.35549
0610012G03Rik	2.57302	1.63216	2.36142	2.19896	2.11062	2.04761	1.48122	1.86093	1.8261
Rnps1	2.56736	1.9429	1.80913	1.80629	2.14608	1.90494	1.934	2.15837	1.84619
Zfp428	2.56506	3.08466	0.974764	2.9059	2.72428	3.24213	2.60018	3.54455	2.01068
Metap2	2.56462	2.6944	1.9807	1.75799	2.23351	2.41984	1.99338	1.91127	1.89568
Capns1	2.56109	1.88624	3.38893	2.83148	2.27785	2.47499	2.38127	2.47635	2.34465
Ube2i	2.56032	2.70236	3.97357	2.14583	2.50675	2.9251	2.37098	2.15447	3.07923
Timm8b	2.55641	2.64877	1.86952	3.18346	2.40328	2.73317	2.83326	2.51794	2.54623
Cmpk1	2.55301	2.51611	1.67396	3.1346	2.48912	2.61803	2.67165	3.20602	2.07601
Mtch2	2.54562	2.56856	1.95488	2.69658	2.50219	2.44458	2.23372	2.64794	2.24458
Ptp4a1	2.53759	2.66651	2.16817	2.11748	2.77245	2.6106	2.02998	2.15668	2.79438
Mzt1	2.53443	1.80752	0.813815	1.48187	1.71751	1.50052	1.48298	1.62008	1.48002
Yeats4	2.52879	2.6375	1.84543	1.26654	2.71526	2.43692	2.04027	2.36299	3.12669
Stub1	2.52787	2.21796	2.95083	2.22025	2.56587	2.64393	2.05054	2.32703	2.11838
Pdcd5	2.52268	2.17289	3.4853	2.8917	2.47258	2.19325	2.51613	2.69137	2.1167
Ube2d1	2.52175	3.33256	1.29189	3.57053	3.23693	3.41384	3.28079	4.14232	1.71903
Ndufb10	2.50837	2.73717	2.29843	3.29906	2.48029	2.56045	2.52735	2.89202	1.84185
Snrpf	2.50602	2.70878	4.74283	1.93379	2.75269	2.46736	3.02336	2.12102	3.03441
Rab11a	2.49461	2.12467	2.08919	2.92257	3.17869	2.33781	2.62274	3.07188	2.27991
Psmb5	2.4931	3.21768	2.64161	3.45044	2.82396	3.58703	3.12413	3.88833	2.40432
Uqcr10	2.49222	2.1876	4.10638	3.11391	2.49561	2.28276	2.7258	2.16493	1.73667
Vdac3	2.48921	2.94079	2.20215	3.21486	2.68058	3.64258	2.88205	4.26236	3.13619
1810058I24Rik	2.48587	1.88647	5.78638	2.17383	3.06604	1.74195	2.46141	2.06846	2.11965
Syt4	2.48202	1.58901	0.114548	1.12187	0.867917	3.21056	0.359815	1.34244	0.423315
Anp32b	2.47953	0.958945	6.33779	1.72011	2.56349	2.03425	2.92154	1.21948	1.69868
BC031181	2.47639	3.11722	1.29024	3.22244	2.90745	2.8594	2.97751	2.87351	2.63106
Psmd8	2.47524	3.46822	2.53064	3.64494	3.06367	3.47793	3.51582	3.62195	3.52009
Parp6	2.47392	2.43343	0.172357	1.7986	2.23502	2.09385	1.79187	2.1069	2.52955
Crip2	2.47065	1.85699	0.710802	3.52745	4.85046	4.23574	1.85966	4.86238	1.23164
Pja1	2.46957	2.03349	1.19545	1.2379	1.47309	1.51313	1.31452	1.53868	1.97589
Romo1	2.46949	2.34918	2.89074	3.1447	2.59027	2.16998	2.52035	2.46985	2.09652
Rnf10	2.4673	2.5219	1.85615	1.78703	2.52406	1.97596	2.45166	2.2191	3.07174
Eif2s2	2.45926	2.22278	3.94166	2.4312	2.65265	2.41281	2.30834	2.4669	1.41568
Nisch	2.45752	1.69975	1.86837	1.88093	1.85508	1.81864	1.65094	1.45282	3.29958
Srsf11	2.45294	2.62573	2.27805	1.81927	2.39837	2.67742	2.75646	2.25631	3.29616
Rwdd1	2.45055	1.44997	2.92149	1.82973	1.96587	1.64594	1.74662	1.73029	2.1778
Rheb	2.44918	1.80525	2.65458	2.32737	2.26647	2.61428	2.15077	2.23927	2.27286
Cmas	2.44666	2.43667	0.612085	2.16097	2.65864	3.44696	1.4972	2.46719	1.90143
Ndufa13	2.44448	2.74177	4.01655	3.40399	2.68083	2.96262	2.36384	2.78337	2.24343
2700094K13Rik	2.43939	2.18899	6.03294	2.37697	3.43435	2.28478	2.49447	2.31445	1.33327
Cyth2	2.43347	3.94754	0.918799	2.09687	3.24417	3.17863	2.98547	2.91762	3.78366
Fam195b	2.42953	2.17895	2.38234	2.19389	2.25071	1.97609	2.4299	2.19262	1.78418
Srsf6	2.42926	2.60182	3.03952	1.87821	2.37142	2.48591	2.48315	2.56236	3.16181
Srsf7	2.42655	2.44317	3.92199	2.04236	2.47978	2.8386	3.01662	2.42729	2.26254
Bcas2	2.41552	2.49201	2.74019	2.90275	2.48571	2.92033	1.89402	2.66298	2.19766
Prmt2	2.4154	1.7835	0.865002	1.93462	2.2974	2.04073	1.5617	2.05677	2.47129
Mien1	2.4151	2.30629	0.749906	2.74363	2.17561	2.02312	2.52716	2.24725	1.63204
Pbx1	2.41437	3.88043	1.08227	2.43921	2.39105	2.08388	1.65924	2.71231	3.16526
Pafah1b2	2.41406	2.90327	1.76795	2.56525	2.35898	2.55044	2.51721	2.75664	2.77797
Tppp3	2.4112	1.35406	0.334422	9.76756	5.40234	2.31595	5.51197	10.8416	0.774749
Tceb1	2.40786	2.55745	2.82506	2.97314	2.45571	2.61293	2.78621	2.85186	2.51108
C1qbp	2.40109	1.54511	1.75696	2.05984	1.52149	2.15863	1.70334	1.81232	1.51147
Csde1	2.39778	2.44099	1.49538	2.47021	2.35629	2.27474	2.39622	2.32373	2.12037
mt-Nd3	2.39534	2.23243	2.12436	2.772	1.871	2.01043	1.79216	1.69475	2.71101
Dctn3	2.392	3.25872	1.18839	3.5672	2.86122	3.19371	2.47211	3.42822	2.18371
Lamp1	2.39182	2.30558	2.89451	2.58439	3.05045	3.53114	2.92817	2.57176	2.96727
Stx7	2.38705	2.01998	0.770255	2.23554	2.3499	2.07918	2.3563	2.84298	1.64069
Fam96b	2.38489	1.12156	1.06035	1.57891	1.56142	1.36066	1.66625	1.75471	1.57789
Ndufa1	2.3821	2.43777	2.0065	3.11774	2.15891	2.14514	2.26341	2.44978	2.17424
Ddx39b	2.37778	2.40228	3.26764	1.88162	2.39557	2.78546	2.99975	2.77404	3.18666
Fus	2.37475	3.38423	3.13505	2.2486	2.77386	2.78631	2.73828	2.90139	3.15785
Cacybp	2.37179	2.53782	2.17986	2.22742	2.29144	2.76366	2.02252	2.24573	1.84967
Atp6v0b	2.36992	3.16763	0.933562	4.09582	2.82497	3.75784	2.95186	3.05921	2.08092
Rac1	2.36928	2.18091	4.06083	2.46177	2.65959	3.08939	2.39219	1.97381	1.93204
Smim14	2.36014	1.97282	0.710032	2.62228	2.20365	2.22407	1.53913	2.11753	2.14415
Sh3glb1	2.35876	1.50332	1.94687	1.88001	1.86722	1.72182	2.32338	1.94915	2.09037
Fam49b	2.35663	1.62409	1.24448	1.50468	1.62587	1.81755	1.3527	1.64753	1.43798
Ndufb11	2.35504	2.30493	3.18343	3.17231	2.65689	2.35196	2.53501	2.44517	2.17717
Dync1i2	2.35464	2.72028	1.47641	2.33375	2.45994	1.98599	2.84344	2.97832	3.34308
Sept7	2.35031	2.32477	2.4881	2.13532	2.16685	2.43764	2.44817	2.457	1.44457
Zc3h15	2.34794	2.4587	1.81529	1.85546	2.10564	1.97852	2.14103	2.13494	1.30127
Guk1	2.3448	1.43826	0.787505	2.05742	1.32768	1.3575	1.04368	1.74713	0.829723
Prdx6	2.33743	1.71539	1.81046	2.43464	1.40703	2.33849	2.97436	2.63377	0.939946
Tmem234	2.33552	2.36007	2.36909	2.62128	2.8473	2.48377	2.35328	2.26596	1.9709
U2af1	2.3347	2.38276	3.75437	2.48021	2.56364	2.51321	3.07029	2.86251	1.88214
Mbd3	2.32856	1.84796	2.60918	1.67674	2.13247	1.67008	1.89295	1.51747	3.61542
Cript	2.32403	2.52342	1.37776	2.54192	2.27212	2.24772	2.17052	2.45218	2.1596
Ssb	2.32142	3.07592	2.45614	2.28795	2.17465	2.96557	2.31427	2.56038	2.27352
Traf4	2.31983	2.77512	1.39611	1.991	2.14	2.06356	2.40004	2.37049	3.66333
Apbb1	2.30332	2.36895	0.54443	1.56602	2.34795	1.8942	2.2653	2.03402	2.27345
Psmb4	2.30189	2.99135	2.63531	2.66526	2.42862	2.97687	2.83026	2.79892	2.55411
Atp6v0d1	2.30127	2.90672	1.51649	3.24389	2.83157	3.00861	2.72871	3.64165	1.95625
Clic1	2.29333	1.36938	5.04062	3.56932	3.86142	4.12586	3.66366	3.80549	1.56843
Dcun1d5	2.29208	1.47838	2.49118	1.84568	1.66847	1.89346	2.2849	2.00977	1.94075
Dclk1	2.28837	1.65634	1.11714	2.25356	2.09338	1.87153	1.39071	2.95428	1.44543
Hdgf	2.28524	2.16009	2.24779	1.86423	2.33024	1.86682	2.1621	1.68044	3.32216
Pafah1b1	2.2801	1.5478	1.52995	1.97151	1.95591	1.75153	2.03975	1.55055	2.10576
Pfdn1	2.278	2.50158	2.58197	2.8885	2.60972	2.3793	2.15412	2.41854	1.59555
Trim28	2.2764	2.85923	2.56776	1.15262	2.14011	1.93544	2.33761	1.74552	3.75377
Pbrm1	2.27257	1.87749	1.53771	1.73244	2.06564	1.67963	1.94716	1.77123	2.18573
Rnf165	2.27177	2.8049	0.312662	2.21021	2.11845	2.61266	1.78207	1.99457	2.71931
Rab7	2.25485	2.3752	1.35788	2.52096	2.52008	2.68508	2.01949	2.37235	2.32976
Ap3s1	2.25377	2.43929	2.49767	3.14827	3.35044	2.26601	2.65998	2.90657	2.16999
Bnip3l	2.25139	2.73748	1.57021	2.27818	2.56536	2.30166	2.50935	2.47487	2.77452
Fubp1	2.2489	2.94394	2.04742	1.66157	2.41436	2.05257	2.52288	2.15183	2.51909
Zcrb1	2.24785	2.19088	1.7526	2.08481	2.23576	1.89226	2.07399	2.04638	2.25903
Trp53i11	2.24743	2.85979	0.235115	2.36644	2.43077	2.2168	3.4668	2.8451	3.76691
Dpysl4	2.24586	3.29309	0.179075	1.55838	1.65062	1.87169	2.77338	2.44747	3.08196
Kif1b	2.24578	1.79097	0.79745	2.87759	1.9238	2.0252	2.06327	2.33246	2.19407
Dnaja2	2.2387	2.21559	1.65621	1.7123	1.83118	1.80564	2.11264	2.0262	2.21907
Manf	2.23258	1.34834	3.52211	1.4277	1.6033	1.68273	2.04254	1.67167	1.51388
Vbp1	2.22945	2.74754	0.931587	2.61578	2.29674	2.62355	2.18967	2.68253	2.85482
Mettl9	2.2281	2.62313	3.39983	2.2953	2.92414	2.35465	2.38762	2.25004	2.46151
Pin1	2.21643	1.94142	1.87726	2.29681	2.09967	1.87895	1.56458	1.75479	1.40233
St13	2.20994	1.67586	2.60619	1.73936	1.98363	1.99497	1.42423	1.5781	1.7936
Nudt21	2.20796	1.7056	2.87856	1.68456	2.22769	2.15128	2.25057	1.71994	3.01366
Mrpl54	2.20794	1.6056	2.08747	2.10409	1.82654	1.87511	1.89888	1.99572	1.77397
Mkrn1	2.20519	3.01682	0.498192	1.78275	2.05397	2.26974	1.60122	1.96555	3.13437
Gm2694	2.20323	4.48877	0.0592133	0.401033	1.49368	0.398102	0.84485	0.453595	0.273463
Srsf5	2.20316	2.21572	2.76457	2.03006	2.53272	2.50773	2.55997	2.05347	3.69112
Ppp2ca	2.20135	2.86672	1.7713	2.43119	2.62631	2.64208	2.31701	2.69778	2.84813
Cmip	2.19495	1.48022	0.334175	1.52855	1.43263	1.56841	1.68854	1.76008	1.81271
Zfand5	2.19276	3.04846	1.19098	2.00667	2.26304	2.72946	1.86622	2.07596	2.70226
Bex4	2.19201	0.714357	1.21968	1.74183	1.45853	1.12084	1.34983	1.37057	1.22469
Hpcal1	2.19023	0.46182	0.570134	0.714569	1.36253	1.02671	1.06575	4.81776	2.43469
Med28	2.18455	1.94787	1.95652	1.92513	2.1327	2.07236	1.62378	2.01992	2.67866
Cdk5r1	2.18385	2.366	0.179529	2.03667	2.02532	2.65549	1.74562	2.26118	2.3398
Lsm4	2.1804	1.79584	2.83461	2.14832	2.00744	2.27018	1.9396	1.77074	1.99755
Top1	2.1743	3.38702	2.66224	2.26187	2.20765	2.37413	2.4931	1.97092	3.98242
Smarcb1	2.16654	2.50729	1.93332	1.77021	2.05489	2.33587	1.65502	2.30791	2.15464
Tmem167	2.1627	1.75618	4.5837	1.75296	2.08807	1.9966	1.8837	1.84853	2.59604
Cnih2	2.15897	7.35625	0.80241	3.79171	7.40088	7.28756	2.0085	4.83708	4.11224
Gm16286	2.15542	1.64856	1.19127	1.83063	1.6473	1.83746	1.55971	1.83931	1.60494
Cfdp1	2.14678	1.75906	3.00237	2.04271	1.99237	2.14722	1.53848	1.99041	1.3835
Bzw2	2.14358	3.57729	1.25856	1.94479	2.59765	2.87765	1.66928	2.8093	1.47377
Thra	2.13966	1.9105	0.839221	1.8126	1.62165	1.6115	1.2391	1.34323	2.07171
Tax1bp3	2.13704	1.78979	3.14749	1.88244	2.65551	1.84978	1.79774	1.19401	2.14413
Syt11	2.1327	1.7128	0.243699	2.40448	1.83712	1.66796	2.89961	1.9995	2.63162
Ier3ip1	2.12621	2.26767	1.6704	2.26162	2.40035	2.24245	2.36305	2.61937	2.20082
Pfdn4	2.12369	1.98844	1.02547	2.9837	2.18037	2.47591	2.81217	2.91577	1.373
Acly	2.12224	2.26813	0.960193	1.94092	2.4467	1.6962	1.74563	2.35064	1.57736
Tle4	2.1209	0.323712	0.0372165	0.798554	0.253793	0.224586	0.317226	0.698493	2.34279
Rad23b	2.11949	2.20823	1.9116	1.67992	2.35986	2.22311	2.17153	1.99375	2.10474
Prkaca	2.11899	2.23499	1.7521	2.06221	3.01751	2.12745	2.12739	2.46184	2.54832
Akirin2	2.11758	3.08064	1.67109	2.11308	2.51755	3.11558	2.68288	3.09221	2.49802
Eif3a	2.11574	1.55874	1.85883	1.40367	1.63876	1.38316	1.72845	1.23362	1.48791
Tmod2	2.11542	1.56643	0.36324	2.45644	1.83329	2.6765	1.06236	1.69622	1.74306
Gnao1	2.11311	1.37502	0.256057	1.50044	2.07056	1.22403	1.81221	2.22644	0.828649
Nipsnap3b	2.11073	1.67689	0.585614	2.4785	1.88167	2.06455	2.09912	2.3456	1.84654
Arpp19	2.11072	1.98493	3.1578	2.17437	2.10552	2.17069	2.07075	2.01788	2.18953
Ndufa12	2.0953	1.51936	2.1049	2.7324	1.90109	2.13375	2.02038	2.01534	1.41059
G3bp1	2.09393	1.79065	2.89938	1.26305	1.68999	2.35977	1.672	1.39733	1.91344
Uchl3	2.09365	2.12602	1.13475	1.73882	1.33085	2.16652	0.94273	1.64042	1.32116
Ndufs6	2.07692	2.23444	2.75253	2.27789	2.32482	2.06371	2.14456	2.17908	1.77741
Ndufa6	2.07086	2.32418	1.73565	2.58665	2.03025	2.10657	1.91291	1.99203	2.32234
Psmd4	2.06662	2.53562	1.95866	1.84443	2.07675	2.49966	1.69256	2.07924	2.80796
Trappc6b	2.06613	1.64207	0.906476	1.96185	1.91013	1.81591	1.85911	1.8491	1.38984
Sumo3	2.066	1.7197	2.84456	1.46092	2.40292	1.7974	1.82845	1.66373	1.79453
Psma5	2.06209	2.0614	3.19385	2.25219	2.10269	2.44457	2.71629	2.31939	2.18309
Klhdc2	2.05897	2.35611	1.61746	1.57032	1.96902	2.03226	1.81494	2.17025	3.62997
Ptp4a2	2.05843	1.43363	1.45226	1.58219	1.64071	1.56439	1.2256	1.63423	1.78251
Cdh2	2.05783	2.12668	0.37828	1.00453	1.59574	1.23049	1.82035	1.41014	2.18416
Gtf2h5	2.05577	1.9256	2.41121	2.51882	2.14406	1.70629	2.17769	2.18291	2.20189
Ssu72	2.0528	2.04483	1.91538	2.62017	2.12723	2.26905	2.31141	2.31577	1.60121
Glrx5	2.05181	1.46362	1.91028	1.97195	1.6874	1.78626	2.05901	1.85644	1.23084
Polr2f	2.05081	1.71968	2.25592	1.98096	1.93458	1.74089	1.60898	1.9753	1.9553
Tubb4a	2.04914	3.87806	0.250934	3.13043	3.19128	2.76993	2.56007	4.02096	2.52734
Gabarapl1	2.04866	1.49626	0.290458	1.91807	1.71838	1.85054	1.75767	2.07752	1.06361
Tpm3	2.04763	1.4529	2.75267	1.41957	1.72732	1.87458	1.65842	1.68721	1.8188
Cnn3	2.04625	4.18683	3.31838	3.25741	3.79364	3.71594	5.07132	4.96579	2.7651
Ubxn1	2.04188	1.63054	1.89757	1.71562	2.0563	2.16074	2.64046	1.95082	2.70733
Map2	2.03989	4.02491	0.205217	2.56174	2.60177	2.62748	1.32466	2.42573	2.95255
4833439L19Rik	2.03231	1.75358	0.882797	1.79774	2.06132	1.62456	1.94637	1.94089	2.79491
Smap1	2.02934	1.43485	1.98659	1.40774	1.60663	1.5193	1.55452	1.2331	2.52001
Dgcr6	2.02743	1.81081	1.01151	1.86037	1.7886	1.63461	1.28207	1.65503	1.82252
Vat1	2.02732	1.63004	0.799677	1.46622	3.35504	3.19749	0.6455	2.26749	1.34721
Gars	2.02536	1.63111	0.798711	1.31471	1.5311	1.62008	1.43391	1.62064	1.1185
Ssbp3	2.02085	2.56405	1.25458	2.14101	2.11849	2.11719	2.08415	2.2455	2.78497
Ostc	2.01898	1.35896	4.49951	1.55171	2.0881	1.63431	1.84426	1.76858	1.18157
Srsf1	2.01615	1.82763	2.34349	1.72104	2.03254	1.88682	2.07211	1.63249	2.32626
Chchd1	2.01469	1.48266	1.61838	1.77329	1.6019	1.98705	1.86369	1.73841	0.991061
Tprgl	2.01418	1.22116	1.78326	1.79833	2.13206	1.39324	1.70228	1.53398	1.59397
Gm10076	2.01277	1.62996	3.49282	2.20693	1.77033	1.6581	1.84331	1.48652	1.96177
Dad1	2.01135	2.3542	3.35329	3.45188	1.88501	2.87568	1.93622	2.64225	1.75589
Rcn2	2.01071	2.4783	1.74367	1.80688	2.16198	2.65803	0.926311	1.62047	4.01274
Psenen	2.00913	1.7529	1.53273	2.8715	1.68813	1.85261	1.86693	1.75357	1.71948
Grina	2.00489	2.76966	0.537696	2.54732	2.27951	2.00818	2.03333	2.367	2.29656
Cst3	1.99922	2.14619	3.57677	3.92585	2.72246	6.41864	2.29839	3.14085	1.67783
Fam32a	1.99799	2.02424	1.51431	1.97012	1.92573	1.75083	1.88618	2.13797	2.38853
Coa3	1.99308	1.99802	2.27679	2.62479	2.23662	1.68915	2.02848	2.29052	1.53469
Pfdn6	1.98669	1.8003	1.98791	2.06357	1.69828	2.01538	1.86766	1.89911	1.53119
Ctxn1	1.98325	3.09367	1.27688	3.68496	3.02944	2.8149	3.01402	4.02135	2.54227
Tsn	1.98247	2.76121	1.85308	2.67208	2.41043	2.43712	2.18268	2.8138	2.09272
Sptssa	1.98157	1.6419	2.30629	1.89736	2.31389	1.88994	1.88037	2.10462	1.32124
Nabp2	1.98109	1.60855	0.973193	1.7326	1.448	1.79154	1.67809	1.24376	1.68305
Nt5dc2	1.98077	3.08921	2.98793	1.89918	2.61064	2.04086	3.63173	2.57275	2.10435
Ewsr1	1.98041	2.58671	1.97923	1.47717	2.13216	2.2668	2.15721	2.0613	2.46058
Vapb	1.97976	1.34825	1.15289	1.38855	1.88702	1.45834	1.54176	1.62325	2.3338
Brwd1	1.97502	2.56469	0.861317	1.73693	2.27069	2.4676	1.49184	1.95226	1.77312
Serinc1	1.97261	2.51312	0.90878	2.84517	2.11084	2.28493	2.15473	2.31973	1.97985
Cnih1	1.97016	1.96613	2.11403	2.39159	1.87671	1.67125	2.38288	1.86222	1.63638
Prkar1a	1.96853	2.68747	1.5481	2.27832	2.2057	2.92954	1.76988	2.52798	2.9414
Arl3	1.96739	2.41724	1.72249	2.28675	2.67349	2.30537	1.77638	2.86493	2.29813
Ankrd11	1.96668	1.87883	1.63219	1.08449	1.7397	1.67094	1.65359	1.20649	2.9992
Higd2a	1.96322	1.66921	1.4511	2.31599	1.99325	1.91041	1.65123	1.49518	1.39769
Ndufv2	1.96067	2.59359	2.34573	2.73888	2.2489	2.51437	2.30865	2.36919	1.79481
Mea1	1.96038	1.63161	1.34317	2.07169	1.70276	1.77445	1.42185	1.87915	1.69687
Smarca4	1.96004	2.86676	1.20998	1.64501	2.13862	1.69338	2.29465	2.09748	2.874
Polr3k	1.95973	1.84289	1.16943	1.74792	1.61753	1.464	1.21262	1.83592	2.06472
Mrps21	1.95578	2.16822	2.08874	2.36976	1.79793	1.79784	1.79003	1.92941	1.42729
Snrpd3	1.95441	1.8542	2.65607	2.04259	1.78907	2.03501	1.85368	1.8353	1.51382
Denr	1.95009	1.72209	2.50494	1.57177	1.89296	1.88216	1.17361	1.65705	1.43515
Brd3	1.94745	2.30784	1.78987	1.38834	1.89033	1.91687	1.71003	1.4871	2.58656
Tdg	1.94728	1.88859	1.07127	1.18482	1.68961	1.77173	1.61207	1.31591	3.07121
Gstm5	1.94711	1.63334	2.3168	2.65486	2.2507	1.64961	1.92367	1.89656	1.63167
L1cam	1.93984	0.857178	0.108724	1.8244	0.993666	1.08154	1.16592	1.34899	0.8018
Tmem256	1.93922	1.95917	2.86205	2.66919	2.52766	2.11946	2.12647	2.07859	1.46841
Ap1s1	1.93914	1.73632	1.22116	2.14069	1.80163	1.76039	1.91133	1.70458	1.42495
Krtcap2	1.93532	1.88649	4.84804	2.37496	2.51859	2.16151	2.1066	1.77686	1.09747
Ndufs4	1.93105	2.19568	1.78665	2.65231	2.14379	2.22557	2.20628	2.40348	1.40781
Ank2	1.9291	2.16272	0.695755	1.82039	2.84453	1.12661	2.05018	1.04759	0.768957
Rbm25	1.92845	2.08456	1.74587	1.52241	2.01629	1.85222	1.80979	1.60069	1.98143
Mrpl30	1.92828	1.64945	2.07517	2.07289	1.71672	1.63013	1.60493	1.66846	1.49964
Esd	1.92758	1.9779	2.12971	1.94908	2.05653	1.81145	2.05571	1.68724	1.80741
G3bp2	1.92756	3.77123	1.1202	2.47464	2.33238	3.04234	2.94615	3.33573	2.31447
Rabac1	1.92644	1.50732	1.84947	4.16052	2.16005	1.73872	2.50455	1.82115	0.654827
Ubald2	1.92526	3.32693	1.57238	2.7742	2.24684	2.93606	3.52268	2.98406	2.8771
Tmem258	1.92521	1.78503	2.65526	2.09577	1.83352	2.03188	1.83787	1.53631	2.30429
Mat2a	1.9241	2.06012	1.13689	1.54337	1.79955	2.47089	1.3747	1.63177	2.21875
Got2	1.9214	1.8125	1.10929	2.08273	1.43511	1.52431	1.84505	2.05194	0.951124
Efna5	1.90612	0.504118	0.515765	0.859907	0.714213	0.888762	0.46431	1.44611	2.61414
Nras	1.90084	1.10797	1.67318	1.67958	1.82268	1.1939	1.98856	1.34751	1.66206
Stx12	1.89	1.8564	1.11156	1.84695	2.10717	1.8351	1.83536	2.00762	1.48628
Mdh1	1.88818	3.48955	2.76249	3.52569	2.99828	3.17701	2.87384	3.87196	1.70789
Psma1	1.888	2.51898	2.12136	2.01698	2.17529	2.79981	2.25912	2.65769	2.17841
Lrrc59	1.88779	1.27255	2.70575	1.41577	1.55171	1.73051	1.67826	1.35439	1.04059
Eif3c	1.88626	1.8756	1.42703	1.313	1.53998	1.41233	1.51915	1.34387	1.50739
Uqcrc1	1.88559	2.71983	2.51155	2.54015	2.4872	2.85502	2.21206	2.96949	1.57486
Atp6v1e1	1.88469	2.59087	0.874563	3.03435	2.13907	2.43513	3.25271	3.11298	2.42818
Vamp2	1.88338	2.1979	0.452529	2.82164	2.31397	1.67895	1.89923	2.90112	1.46082
Arl8a	1.88199	1.4516	0.527083	2.72341	2.1272	1.90887	2.50137	2.4001	0.493312
Nsg2	1.87338	2.09325	0.151536	2.6027	2.54425	2.38656	0.940532	2.93306	2.09945
Ncan	1.87134	1.89376	0.120136	1.34397	1.06534	1.32876	0.600182	1.22125	1.69381
Tm2d2	1.87025	2.1434	1.2993	1.64976	1.54048	1.88593	2.05302	1.5203	1.85893
Ube2l3	1.86742	1.84659	2.52212	2.01165	1.89812	1.99735	1.88095	1.81724	1.97341
Ilf2	1.85884	3.52461	1.58952	1.81789	2.45765	2.31532	2.45519	2.46425	2.19401
Mrpl12	1.85736	1.40851	1.71574	1.94773	1.3408	1.61773	1.68679	1.42833	1.11241
Rrp1	1.85426	2.2677	1.25351	1.81503	2.13567	2.18502	1.68826	2.29301	2.49071
Bbip1	1.85404	1.37542	1.2218	1.72382	1.66989	1.24443	1.38387	1.33096	1.41464
Tmem59	1.8499	2.76449	1.52184	2.43197	2.13645	2.70976	2.50904	2.25479	2.20482
Mcrs1	1.84587	1.66764	1.21595	1.73663	1.62984	1.26358	1.25397	1.46354	1.42249
Hist3h2a	1.84519	3.26567	0.183174	2.43272	2.25338	2.98051	2.1836	2.0878	2.56495
Ube2r2	1.84283	1.76495	1.82618	1.83859	1.84928	1.49151	1.67316	1.63461	3.34498
Atat1	1.83978	3.19718	0.723436	2.47065	2.81299	2.94538	1.342	2.70829	2.52331
Rundc3a	1.83802	2.26586	0.114812	2.89093	2.87436	2.81593	2.39047	2.7813	2.2515
Oaz2	1.83587	3.01304	2.41066	2.71858	2.71376	2.61951	2.92864	2.63732	2.54209
H2afv	1.83349	2.95611	10.0861	1.46037	3.64837	2.34892	2.8188	1.58396	5.73302
Dcakd	1.83165	2.22649	2.48957	2.20938	2.07988	2.02056	1.88516	1.12306	2.12338
H1f0	1.83074	2.61477	6.00768	1.64815	3.34498	2.29331	2.96526	1.96125	3.60777
Hnrnpa0	1.82857	1.82424	2.09426	1.47452	1.63839	1.78177	1.66321	1.43195	1.91888
Tra2b	1.82643	1.92371	2.60087	1.17585	1.64745	2.00293	2.07511	1.6685	2.17848
Rhoa	1.8252	1.60309	3.48369	1.72893	1.92365	2.23257	2.15092	1.8479	1.73923
Rab1a	1.82301	2.01148	1.91366	2.18876	2.06097	2.74229	2.07364	2.55066	1.60871
Ptges3	1.81936	1.31467	2.44961	1.55737	1.83241	1.54379	1.69849	1.40365	1.30213
Psap	1.81847	2.80061	1.32764	1.65243	2.99236	3.98558	2.68068	3.37519	2.50797
Rnf14	1.81845	1.46721	0.543127	1.62895	1.82573	1.24865	1.37331	1.70435	1.08678
Tmem147	1.81659	1.53102	1.53354	2.13779	1.39088	1.54327	1.66664	1.25281	1.53645
Cetn3	1.81545	1.81398	2.22779	2.32765	2.2074	2.40091	2.0474	2.74209	2.01433
Sh3bgrl	1.81433	2.15298	1.51853	2.1913	2.08751	2.05407	2.61204	2.98026	1.26203
Emc6	1.8102	1.79572	1.22654	1.99553	1.59942	1.92947	1.73408	1.79136	1.14173
Ndufb6	1.8102	1.73694	1.99348	2.7078	1.56919	1.88681	1.81948	2.41231	0.990457
Spcs1	1.80885	1.71495	3.18919	2.69885	1.98813	2.02256	2.27274	2.00153	1.65757
Myef2	1.80848	1.81881	0.815373	1.9932	1.79152	1.99474	2.19536	1.78308	1.28084
Laptm4a	1.80826	1.18865	6.1289	1.93817	1.57264	1.7005	1.55084	1.26166	2.11578
Phip	1.80803	1.93793	1.33818	1.01709	1.45158	1.25883	1.49668	1.10322	4.74777
Scand1	1.80619	1.89188	1.88512	1.65622	2.01368	1.90612	1.74535	1.63881	2.32134
Cyc1	1.80608	2.28607	2.13106	2.59096	2.06273	2.23829	2.19559	2.30554	1.1581
Isyna1	1.80473	0.731781	1.72915	0.911318	1.1413	1.06141	0.429525	1.12398	0.834733
Cwc15	1.80128	1.85998	1.98223	1.48111	1.82391	1.68465	1.70187	1.26618	2.12856
Palm	1.79989	1.36192	0.610531	1.95791	2.1556	1.86941	2.26046	2.17536	1.38985
Kctd13	1.79645	1.02229	0.188185	1.07393	0.932901	1.19357	0.675324	1.03406	1.15029
C1d	1.78982	1.92565	2.16911	2.85411	2.44442	2.18754	2.0873	2.60642	1.31794
App	1.78948	2.71413	1.61428	2.64751	2.55354	3.43309	2.10474	2.44553	1.4891
Mmd	1.78872	2.37463	0.907628	2.38086	2.1219	1.97069	2.0606	2.11048	1.42542
Ppib	1.78623	2.47693	8.16201	2.95668	2.43335	2.46733	3.9292	2.35586	2.05253
Canx	1.7854	1.24422	1.88433	1.41149	1.50372	1.45081	1.3048	1.18633	1.1429
Hnrnpr	1.78481	2.93121	1.93502	1.64472	2.05773	2.42096	1.82175	2.00276	3.35244
Chmp5	1.77539	2.49924	1.01543	2.03651	2.14752	2.36441	1.80283	2.25835	3.07905
Eif3l	1.77537	1.74694	1.66307	1.50154	1.5793	1.54213	1.70394	1.80964	1.63875
Pink1	1.77527	0.822192	0.199213	0.578166	0.76348	0.396893	0.817282	0.665566	0.676132
Smarcc1	1.77311	1.74297	1.18389	1.05109	1.17335	1.35539	1.42119	1.49769	1.56206
Golga7	1.77303	2.04462	1.29199	1.62494	1.86609	1.5537	1.42227	1.66467	2.06988
Fam103a1	1.77236	1.38209	1.44098	1.85996	1.92575	2.2515	2.08955	2.05754	2.02811
Psma6	1.77204	2.4458	2.57926	2.30767	2.09748	2.90708	2.24118	2.60125	2.19781
Gamt	1.77024	0.116095	0.48803	0.559731	0.598468	0.275102	1.33222	0.577542	0.409447
Plppr3	1.76978	2.65557	0.415051	1.43191	2.54671	2.13494	1.49629	2.47653	2.68977
Nenf	1.76942	1.18518	2.39969	1.84786	1.6931	1.19832	1.37258	1.17964	1.14195
Eif4e	1.76891	1.60732	1.86439	1.88393	1.47448	2.06392	1.69771	1.7536	1.41017
Podxl2	1.76843	2.80612	0.648548	1.63129	1.62194	2.40282	1.27461	1.95161	1.96137
Mpnd	1.76289	1.98504	1.42265	1.56718	1.95731	2.03841	1.26065	1.69113	2.32367
Psmd7	1.76131	2.15341	2.06903	1.7085	1.7089	1.97646	1.62447	1.71787	2.26849
Rbm4b	1.75946	2.7223	1.18604	1.47245	1.93107	1.8489	1.36855	1.93692	3.2268
Tsen34	1.75783	1.65648	2.98779	1.74855	2.01974	1.98157	1.40759	1.60094	1.39215
Srm	1.75467	0.660468	1.46825	1.07602	0.675383	1.43401	0.865228	0.642628	0.552966
Cuedc2	1.75358	2.09842	1.33837	2.25014	1.7314	2.17228	1.63414	2.18172	1.41013
Btbd1	1.75317	1.33826	0.909262	0.892365	1.42264	1.33059	1.09217	0.82865	2.31692
Klf6	1.7526	0.407466	1.94788	0.711275	0.561624	1.14463	0.722741	0.48724	1.18242
Atf4	1.75251	1.34817	1.30935	1.03763	1.52263	1.5165	1.59482	1.39384	1.931
Celf4	1.7524	2.81658	0.273413	1.49185	4.10974	7.00897	0.6698	1.3384	1.23735
Arl6ip5	1.75113	1.90761	1.18836	2.57271	1.96399	2.55997	1.68685	1.95675	1.42819
Trappc1	1.75068	2.26246	2.0353	2.13026	2.04287	1.84869	1.8282	1.94507	1.33312
Lamtor5	1.74885	1.68065	1.76121	2.13769	1.68744	1.76291	1.80308	1.67462	2.25276
Ndufs2	1.74722	2.79736	1.55865	2.05259	1.95069	2.10028	1.95431	1.81563	2.11291
Polr2k	1.7469	1.72797	1.54777	1.74589	1.88347	1.82856	1.88237	1.68966	2.37757
Ppp4c	1.74565	1.65272	2.71932	1.36732	1.70377	1.57731	1.44741	1.69878	2.28852
Cdv3	1.74415	0.969729	2.33608	1.377	1.45082	1.19866	1.34209	1.29195	0.867162
Tmem50a	1.74095	1.50708	1.5748	2.41957	1.92692	1.99266	1.82605	1.77903	1.75948
Gtf2a2	1.74087	1.71024	2.15517	1.69285	1.57865	1.59864	1.82523	1.69684	1.49046
Anapc11	1.73502	1.73493	3.23314	1.97307	2.01791	1.78705	1.47867	1.82973	1.4277
Arhgdig	1.73425	0.2224	0.0261961	1.63904	0.336156	0.549364	0.686407	0.621413	0.0645895
Tomm7	1.73169	2.1799	2.71275	1.91073	1.90859	2.31049	1.62176	1.71301	1.81548
Samd10	1.73164	1.78092	0.115989	1.5735	1.46997	1.16109	0.726705	1.41656	1.13501
Dnajc2	1.73157	1.03485	1.24457	1.04474	1.26453	1.12887	1.09978	1.0436	0.801198
Hmgcr	1.72647	1.11501	0.626964	1.43725	1.72998	1.32102	1.01705	1.535	0.615081
Usp22	1.72628	1.64342	0.798956	1.81052	1.51088	1.36363	1.5079	1.63041	1.02709
Dync1li1	1.7241	1.53227	0.586609	1.09945	1.45141	1.23439	1.71782	1.58121	1.82071
Sfxn1	1.7228	0.886159	0.762589	1.12249	1.11387	1.06308	0.761064	0.903197	0.888822
Tomm5	1.72162	0.867016	2.13162	1.18736	1.23438	1.50452	1.08614	1.11694	1.27329
Rbm17	1.72004	1.46564	1.78324	1.86686	1.45087	1.40983	1.56941	1.4201	1.35402
Wtap	1.71643	0.85967	1.47242	1.50956	1.39752	1.15458	1.68068	1.43928	1.74589
Ube2v2	1.71171	2.21647	1.1055	2.14364	2.03102	2.09475	1.55715	2.13691	1.55619
Spcs2	1.70934	2.22119	2.31311	2.01269	1.88066	2.32969	1.6946	2.14229	1.92022
Ctnnbip1	1.70875	1.67605	1.21088	2.00981	1.98842	1.439	1.96628	2.07542	0.908812
Pak1	1.70814	2.19232	0.211904	1.41907	1.81554	1.38678	1.22546	2.15716	1.35249
Eif4h	1.70753	1.73489	2.1828	1.42924	1.50835	2.0933	1.58028	1.42487	2.13585
Ndufb2	1.70742	1.79536	1.8926	2.55872	2.05231	1.54769	1.86324	2.10184	1.24919
Cdc37	1.70661	2.25255	2.28083	1.87558	1.99838	2.05392	2.84404	2.16217	2.41203
Spag7	1.70547	1.83237	1.68766	1.71248	1.98476	2.0763	1.72051	1.8188	1.59773
Fam104a	1.70525	1.09522	1.66919	1.11027	1.32192	1.11689	1.20522	0.971974	1.56556
Chtop	1.70478	1.88349	1.84848	1.53321	1.58009	1.52737	1.64593	1.48517	1.93027
Hspa5	1.70286	1.74258	3.25219	1.10961	1.79713	1.66188	2.25216	1.68586	1.04551
Ubqln2	1.70116	1.84441	0.763525	0.875641	1.53874	1.79464	1.0166	1.5135	3.00688
Gabbr1	1.70039	1.60154	0.341263	1.5992	1.85293	1.28228	0.998339	1.43495	1.07069
Snrpc	1.69891	1.80923	2.29633	1.3138	1.73665	1.85101	1.79972	1.7491	1.95158
Wdr6	1.69849	1.74694	0.429962	1.51172	1.44224	1.42987	1.04421	1.20596	2.47769
Drap1	1.69557	1.70537	1.65374	2.08903	2.04787	1.67799	1.70539	1.68123	1.913
Limd2	1.69496	1.67953	4.42492	1.74663	2.33034	2.35713	1.51513	1.13571	2.66226
Rab6b	1.69467	1.60068	0.199824	3.39213	2.2277	1.75509	1.86685	2.89015	0.981756
March5	1.69415	1.75546	1.53571	1.41828	1.30857	1.59099	1.84214	1.70109	2.7292
Rer1	1.69242	1.41712	2.65077	1.77284	1.4656	1.68574	1.68887	1.41097	1.42951
Ccdc88a	1.69207	1.66956	1.16699	1.13541	1.63337	1.25314	1.70271	1.36394	1.9087
Csnk2b	1.69121	2.29815	1.94957	2.1338	1.92462	2.00554	2.13482	2.15216	1.23449
Prdx5	1.68658	2.03213	2.09767	2.21826	1.94616	2.15142	1.75052	2.09808	1.4733
Cd81	1.6862	1.07653	4.23885	2.96371	2.46008	2.44905	2.17068	1.35948	2.16141
Mex3a	1.68581	2.05569	0.713963	1.76456	1.36683	1.7365	1.64187	1.73053	2.19933
Ube2j2	1.68541	1.65836	1.51167	1.18993	1.58173	1.46381	1.59602	1.45502	1.81165
Nxf1	1.68525	2.09558	1.24243	1.54794	1.5823	1.76163	1.64827	1.58115	1.77191
Ivns1abp	1.68474	1.7783	0.950315	1.1023	1.30034	1.4989	1.56492	1.15641	1.28775
Cs	1.68459	1.35803	1.17141	1.42077	1.32971	1.21726	1.82409	1.38622	1.09153
Sfr1	1.68327	1.71303	3.2809	1.42163	2.08005	1.88801	2.18775	1.63003	2.89825
Brd2	1.67939	1.54207	0.947213	1.29006	1.46397	1.37349	1.24035	1.04787	1.55165
Taldo1	1.67887	1.96274	2.19687	1.94337	1.81187	2.24355	1.93067	1.86471	2.0454
Bzw1	1.67876	2.59268	2.1937	1.89235	2.18396	2.80679	1.96248	2.33198	2.17194
Ctnnb1	1.67588	1.8896	2.79855	1.39343	2.46816	1.3478	2.00258	1.38654	3.87178
Grb10	1.6757	0.236152	2.69551	1.13695	0.736869	0.817018	0.975945	0.460588	1.9634
2410015M20Rik	1.66714	1.7475	2.04051	2.3965	1.68355	1.75274	1.3651	1.79238	1.66411
1110008F13Rik	1.6667	1.84035	2.58507	1.99492	1.87695	2.1992	1.76578	1.60782	1.53559
Papola	1.66652	1.81639	1.75821	1.13899	1.47364	1.56283	1.40642	1.24609	2.4074
Dner	1.66569	1.72837	0.137293	0.822121	1.10023	1.0361	0.396889	1.22928	0.49206
Chn1	1.66269	1.83531	0.3811	1.74567	2.17864	1.90505	1.30781	2.01259	2.0635
Tonsl	1.65946	2.34848	1.1652	2.66747	2.01613	2.64753	1.74401	2.35042	1.30262
Zfos1	1.657	1.78194	1.29732	1.49161	1.21564	1.24381	1.87387	0.806312	1.75804
Tia1	1.65596	2.71155	1.5655	1.71339	1.9093	1.84826	1.44877	1.74397	2.34686
Pak3	1.65596	1.0658	0.0893792	0.57247	0.701513	0.725815	0.349445	0.986821	2.25423
Akap9	1.65591	1.92431	0.491508	1.45426	1.39969	1.55429	0.971723	1.60477	1.62904
Trim2	1.65532	2.2745	0.373828	1.73068	1.94194	1.61033	2.76682	2.227	1.3191
Ndufa5	1.65512	2.21156	2.40687	2.45863	1.65997	2.20711	1.33579	2.15463	1.28645
Tbpl1	1.65481	1.81412	0.777141	1.49426	1.38655	1.8952	1.99431	1.67696	1.99899
Tceal8	1.65248	1.44483	2.71427	1.98361	1.84375	1.35264	2.03859	1.87066	2.73272
Ppp3ca	1.65175	2.42182	0.729509	1.15082	2.40225	2.61824	2.05804	1.92887	1.11734
Cyp51	1.6502	1.68543	0.949608	1.32514	1.73419	1.33283	1.11049	1.55228	1.1118
Nrxn2	1.64941	2.21894	0.207655	1.85182	1.61589	1.94461	1.64992	1.66131	1.29768
Wdr89	1.64764	1.12459	2.22877	1.35211	1.29804	1.48488	1.48138	0.924099	1.06172
Epn1	1.64649	1.65895	1.08386	1.51708	1.46922	1.38006	1.59461	1.50997	1.9417
Celf3	1.64597	2.39793	0.120287	1.63063	1.8938	1.9311	1.07529	1.53481	3.51225
Fnbp1l	1.6454	2.09889	0.430928	1.912	1.35631	1.29716	1.10382	1.6464	1.54319
Arl6ip1	1.64526	2.77699	4.73644	3.09904	2.8757	2.79942	2.2756	3.12689	2.44316
Ndufa8	1.64472	1.93224	1.49276	2.30065	1.54984	1.8391	1.64869	1.82753	1.23553
Fam136a	1.64405	1.34099	0.981427	1.37884	1.36223	1.59937	0.894753	1.22649	1.15884
Aurkaip1	1.64327	1.54105	1.54192	1.75557	1.56993	1.76089	1.45818	1.60974	1.68223
Psmd14	1.64154	1.90804	1.30252	1.31689	1.47038	2.11605	1.5456	1.85658	0.912664
Sf3b2	1.63347	2.22158	1.44861	1.17518	1.89059	1.60253	1.43718	1.49031	2.37757
Mrpl42	1.63338	1.24909	2.47208	1.96631	1.36188	1.36722	1.60594	1.18971	1.18031
Psmc5	1.63282	2.37392	1.73392	2.16526	2.04583	2.6382	2.25635	3.10598	1.25893
Nhp2	1.63233	0.925851	1.65247	1.76971	1.13175	1.64422	1.16257	1.22272	0.919076
Gramd1a	1.63222	1.86999	0.388513	1.32073	1.39173	1.60972	1.26853	1.46716	2.70453
Tnrc6c	1.63112	1.92302	0.737419	0.762195	1.13012	1.19175	1.11753	1.2661	1.87076
Mrpl23	1.62886	1.38283	1.32398	1.47346	1.68762	1.6461	1.57489	1.5168	0.989745
Bud31	1.62875	1.82719	1.58717	1.59372	1.48464	1.66223	1.72676	1.56582	2.39035
Smc6	1.62713	0.622511	1.51536	0.631507	0.846397	0.699924	0.666416	0.527871	0.698768
Skp1a	1.62642	1.91083	1.66063	1.9894	1.65747	1.93316	2.0094	1.94167	1.69291
Mrps36	1.62358	1.04177	1.17142	1.34033	1.42479	1.06158	1.83649	1.34456	1.05991
Psmc2	1.62016	1.94983	1.27172	1.34969	1.68207	2.34845	1.64992	2.00464	1.36361
Eif3m	1.61808	2.03272	2.30661	1.79854	1.78259	2.00527	1.8714	1.77317	1.15447
H1fx	1.61755	1.97757	2.40367	1.25727	2.07254	1.32311	0.98845	0.836159	2.57153
Fam171b	1.6082	1.33918	0.172964	2.12943	0.878922	0.984466	1.66919	1.47848	2.18765
Prkar2a	1.60761	0.965606	0.542854	1.39444	1.56553	1.40638	0.931158	1.17873	0.600686
Acp1	1.60754	1.75657	2.21605	1.42127	1.5345	1.55405	1.51827	1.57429	2.46798
Reep1	1.60692	1.69296	0.224099	2.27322	2.03856	1.79667	1.53031	2.55603	0.683852
H13	1.60679	1.41766	1.29381	1.36227	1.45393	1.81166	1.26957	1.35966	2.17094
Uba52	1.60621	1.3818	1.96295	1.61317	1.48289	1.3752	1.73065	1.34889	1.53309
Lxn	1.60525	0.302388	0.706397	0.484339	0.636279	0.373787	0.509621	0.289755	0.466032
Cops6	1.60487	2.10494	2.58067	2.30643	2.11799	2.75299	2.15982	2.98338	1.58889
Ndfip2	1.60352	1.58307	0.830986	1.79733	1.94838	1.60653	1.6636	1.99621	1.24637
Sptbn1	1.60238	1.0819	2.07804	1.32744	1.4326	1.12049	1.24046	1.40064	0.724555
Apba2	1.60115	1.3948	0.295023	1.62275	2.49388	1.58842	1.22619	2.93681	2.61844
Pam16	1.5999	1.72006	0.906163	1.68717	1.32011	1.88282	0.60349	1.54825	1.2809
Txnl1	1.59949	1.57027	2.97867	1.28295	1.81198	1.78189	1.43955	1.52738	1.57993
Cops5	1.59862	1.5392	1.54853	1.77512	1.62867	1.66426	1.7592	1.88559	1.65028
Maged2	1.59807	1.54954	3.10634	1.16971	1.48396	1.29458	1.26533	1.80044	2.73744
Ubxn4	1.59758	1.49696	1.29137	1.41362	1.36315	1.35882	1.15494	1.19894	1.89097
Nap1l4	1.59505	2.08556	1.15796	1.56393	1.6412	2.25788	1.6551	2.03384	1.56004
Pcmt1	1.59208	1.41958	1.0593	2.29609	1.98002	1.66933	2.36517	2.80637	1.68951
Eif6	1.59163	1.31623	1.93437	1.76874	1.53497	1.85166	1.33417	1.63905	1.24655
Apex1	1.59142	1.50907	1.27443	1.29171	1.15193	1.56869	1.48821	1.54586	1.98041
Hcfc1r1	1.59142	1.18651	0.859762	2.66751	1.48652	1.26962	1.46343	1.9637	1.01408
Capza2	1.59135	2.12045	1.81529	2.1984	1.85472	2.51866	2.09746	2.03747	2.0866
1110008P14Rik	1.59112	1.14905	0.755106	2.1874	1.52567	0.983406	1.2036	1.70898	1.30436
Rsrc2	1.59067	1.85189	1.2585	1.29662	1.60937	1.58868	1.6376	1.25179	2.71236
Nudc	1.58465	1.65276	2.40878	1.57558	1.87856	2.05086	1.8925	1.9803	1.49303
Mapre2	1.58459	1.84448	0.547165	3.68671	1.42264	1.45345	1.65097	1.86872	1.32093
Lsm6	1.57736	1.55618	3.13209	1.7059	2.2067	1.56228	2.30314	1.73994	1.63189
Ppp1r2	1.57592	1.37754	1.59455	1.53821	1.68674	1.46712	5.91355	4.39527	1.60106
Rbm8a	1.57547	1.42022	2.05493	1.39662	1.65514	1.52786	2.04484	1.66652	1.85177
Cnot7	1.57192	1.38681	0.83523	1.16842	1.37585	1.39154	1.24417	1.08485	2.29474
Enah	1.57124	1.76285	0.903158	1.81653	1.50216	1.29615	2.2211	1.60651	1.60603
Emc10	1.57068	1.85564	1.41033	2.03978	2.16136	1.70818	1.54568	1.81082	1.51564
Ergic3	1.56759	2.2263	1.74007	1.61264	1.678	1.70324	1.27813	1.87436	1.54433
Ckap4	1.56609	1.89412	2.43348	1.78152	1.58732	1.26524	1.90492	1.32061	2.61602
Dpysl5	1.56198	1.83543	0.182167	2.07464	1.91752	1.79556	1.36456	2.185	1.65753
2810428I15Rik	1.55933	1.131	1.44918	1.61075	1.46959	1.60483	1.35705	1.61153	0.981537
Polr2j	1.55776	1.79353	1.87021	1.75189	1.70475	2.02279	1.56337	1.64327	1.53696
Sox3	1.5563	0.0655299	0.00916619	0.0683979	0.0706142	0.0497405	0.0134273	0.0119014	0.313392
Ssna1	1.5547	1.32281	2.00297	1.63675	1.79809	1.55587	1.60869	1.60609	1.49234
Pdia6	1.55455	1.40924	4.87719	1.34354	1.53838	2.14289	1.96419	1.46747	0.750841
H2afj	1.55191	1.46038	1.47014	1.4286	1.48318	1.66298	1.13474	1.4575	0.505905
Chd4	1.55156	2.23342	1.25139	1.78976	1.72147	1.84605	1.91955	1.50097	1.92345
Prkar2b	1.55059	1.13844	0.296201	1.07356	0.820941	1.06225	0.69385	0.963768	0.480978
Slirp	1.54943	1.45716	1.88738	1.56784	1.41575	1.5588	1.26489	1.21105	0.857689
Snap25	1.54887	3.40786	0.150552	4.73583	1.88727	1.82712	4.82635	3.00787	2.9623
Ddb1	1.54546	1.31836	1.33296	0.941662	1.45217	0.817459	1.4121	0.981725	1.38476
Ppp1r1a	1.54469	1.02639	0.806178	1.40496	1.1848	0.723376	1.15839	1.25967	0.969869
Ndufb3	1.54351	1.63743	1.59308	1.93307	1.61136	1.5742	1.73725	1.77261	0.837855
Npepps	1.5435	1.42386	0.562969	0.901958	1.25578	1.19192	1.10025	1.19867	2.32563
Tmem63b	1.54257	1.17035	0.298156	1.00628	1.0975	0.928644	0.978009	0.734801	1.60973
Akt1	1.54056	0.975552	1.10522	1.14419	1.31928	1.1081	1.3993	1.18513	1.31942
Eif3d	1.54009	1.57172	1.19399	0.951984	1.37058	1.43632	1.23382	1.11745	1.81806
Akirin1	1.53738	1.51808	0.593355	1.31109	1.45095	1.63611	1.18318	1.59935	1.49389
Luc7l3	1.53527	1.83536	1.56296	1.65306	1.92281	1.60861	1.78523	1.74505	1.71107
Ppp1cb	1.53344	1.8674	1.10912	1.38933	1.62131	1.64533	1.20162	1.25305	1.74975
Tmem120a	1.53205	0.662957	0.539226	0.916516	0.566475	0.661821	0.566337	0.700493	0.913214
Hdgfrp3	1.53199	2.59727	0.929651	1.59579	1.8143	2.36798	1.28712	1.76913	2.10813
Hsp90b1	1.53141	1.63875	3.4996	1.27668	1.47515	1.64857	2.1683	1.44795	1.12024
Sod2	1.53049	1.36762	1.00617	1.55781	1.42607	1.76496	1.32835	1.83807	1.16185
Mrps24	1.52628	1.02297	1.91602	1.23845	1.1853	1.15352	0.929308	1.23581	1.22448
Snrpb2	1.52604	1.61964	2.01131	1.55974	1.46612	1.65488	2.19097	1.60214	1.63316
Psmd2	1.52458	1.8053	1.01694	0.848536	1.45662	1.43057	1.49563	1.48683	1.55654
Snf8	1.52364	1.54774	1.41281	1.50463	1.52714	1.46796	1.39293	1.59237	0.900015
Psmd6	1.52346	2.23974	1.46353	1.71644	1.76323	2.26424	1.95685	2.56098	1.27765
Ciapin1	1.52232	1.90999	1.10046	2.23632	1.60281	1.86373	1.92976	1.88317	1.9249
Arxes2	1.51718	1.00702	0.561663	1.50224	1.07949	1.06367	0.462598	1.28251	0.934239
Eif5b	1.51717	1.58013	2.23962	1.49312	1.5293	1.52855	1.59538	1.34846	1.75825
Spg21	1.51499	1.28119	0.815384	0.860588	1.67158	1.79397	2.0887	1.28362	1.6378
Hypk	1.514	0.985717	1.42724	1.51953	1.20868	1.30115	1.67591	1.32942	0.996591
Arpc4	1.51138	1.34929	1.60409	1.58213	1.54114	1.73555	1.58197	1.79112	1.58416
Kif5b	1.51067	1.51313	1.72554	1.33843	1.76207	1.87751	2.35216	1.73013	2.56552
Kmt2e	1.50993	2.2162	1.00588	1.70842	1.97973	1.84045	1.86754	1.43173	2.37776
Tmem183a	1.50975	0.960223	1.12515	1.23366	1.53509	0.845733	1.27042	0.991894	1.6314
Eif1ax	1.50834	0.959162	3.25631	1.6313	1.6277	1.31664	1.74424	1.31339	1.04648
Dctpp1	1.5068	1.01517	1.34302	1.11332	0.961021	1.45593	0.864567	0.939127	0.294822
Sars	1.50674	1.80627	0.687615	1.34768	1.22529	0.978218	1.01983	1.40655	1.67908
Pmvk	1.50625	1.25757	0.917715	1.87979	1.87813	1.25962	1.29767	1.98743	0.95321
Panx1	1.50601	0.94801	0.321952	0.795043	0.951247	0.818722	0.738566	1.09713	0.556998
Txnrd1	1.50525	1.31167	0.755093	1.02238	1.296	1.45588	1.59233	1.44483	1.33009
Psmd11	1.50009	1.492	1.29134	1.30485	1.45942	1.49676	1.45517	1.56548	1.56174
Psme2	1.49672	1.17073	1.15321	1.32243	1.22697	1.42115	1.06302	1.2606	1.36887
Hspa9	1.49568	1.12744	1.27863	1.03436	1.06354	1.2148	1.26965	0.897282	1.15621
Cox19	1.49509	1.68104	1.09868	1.81701	1.69146	1.63353	2.00352	1.80709	2.22994
Luc7l2	1.49468	1.62545	1.62741	1.3268	1.60185	1.389	1.28105	1.46338	1.86981
Soga3	1.49346	1.3696	0.111396	0.94703	1.65318	1.34453	1.69896	1.51124	1.91465
Sec62	1.49268	1.92795	1.6702	2.0439	1.55792	1.49868	1.79945	1.76592	1.26879
Slmo2	1.49173	1.07284	1.08568	1.01	0.980465	1.00634	0.907188	0.742443	1.23369
Chmp4b	1.49079	0.84574	2.13639	1.2458	1.10764	1.01509	1.02653	1.22324	1.75928
Arl4c	1.4903	1.29139	0.166997	0.973323	1.29907	1.52452	0.934344	1.30541	0.914723
Kpnb1	1.49028	1.24476	1.74321	0.992528	1.26766	1.11043	1.17952	0.91743	1.14074
Pcnp	1.48695	1.34974	1.31141	1.13258	1.66746	1.31777	1.4127	1.2582	1.63035
Slc25a11	1.48688	1.51679	1.13988	1.70763	1.73761	1.48386	1.33662	1.39272	1.34126
Mtpn	1.48597	1.07977	1.53413	1.39674	1.48763	1.20038	1.3914	1.21159	1.70599
Araf	1.48359	1.43244	0.518965	1.87795	1.51669	1.58099	1.0288	1.55425	0.945511
Arid1a	1.48288	1.44678	1.09858	1.37787	1.57393	1.11323	1.66566	1.45429	2.84172
Hn1l	1.48093	0.580586	1.23826	0.763138	1.23671	0.75253	0.625402	0.603143	0.386992
Klhdc8b	1.48007	0.424122	0.225062	1.12173	1.66029	1.39223	0.329951	0.706764	4.23162
Chmp2a	1.47665	1.49432	1.24595	1.69944	1.65594	1.53765	1.22414	1.47942	1.08641
Nsa2	1.46986	1.35149	1.75507	1.5497	1.29911	1.23617	1.55895	1.37595	1.3585
Jkamp	1.46961	1.56742	0.566659	1.54057	1.18794	1.3993	0.996472	1.13655	1.60247
Hnrnph3	1.46935	2.24425	1.01071	1.19059	1.47438	2.0011	1.56063	1.63021	1.91351
Prpf19	1.46932	1.93694	1.88274	1.14466	1.45801	1.93687	1.75647	1.54019	1.2175
Fam57b	1.46738	2.61503	0.106279	2.43342	2.2192	2.24839	1.16638	2.16372	2.18373
Uqcrc2	1.46401	1.90799	1.38756	1.58196	1.48084	1.53267	1.2756	1.52163	1.5657
Puf60	1.46346	1.75447	1.35276	1.15031	1.58181	1.69518	1.33291	1.96891	2.0459
Bag6	1.46344	1.45887	0.619147	0.606938	1.28351	0.702999	1.43505	0.858423	2.29774
Clns1a	1.461	1.54781	1.73768	1.35142	1.41937	1.61783	1.74072	1.5314	1.72733
Wsb1	1.45978	1.89391	0.904913	1.47332	1.42671	1.69136	2.18166	1.94877	2.06602
Tsnax	1.45709	1.73584	0.937985	1.37228	1.53571	2.22815	0.900898	1.3445	0.999144
Armcx2	1.45562	1.31809	1.71808	1.13858	1.42987	1.06413	1.35873	1.16964	2.02569
Rpn2	1.45555	1.22944	1.94635	0.981275	1.26681	1.54281	1.21302	1.29765	1.91032
Eif4b	1.45439	1.30895	1.14864	1.07979	1.15534	0.820485	1.0194	0.770871	1.72578
Cxx1b	1.45087	1.67433	0.766852	1.92881	1.49053	1.79636	1.45159	2.08976	1.51039
Eif3g	1.44989	1.47221	1.90572	1.41199	1.35872	2.18251	1.534	1.50064	1.76158
Robo2	1.44874	1.04594	0.250615	0.451642	0.855918	1.03128	0.745572	0.211215	0.237999
Adprh	1.44797	2.0904	1.50825	1.56384	1.78413	1.78143	1.57522	1.79308	1.53532
Map4k4	1.44707	1.42724	0.779569	1.41994	1.2992	1.48198	1.55202	1.3969	1.40643
Map7d1	1.44623	1.45262	1.14193	1.14826	1.44828	1.53236	1.628	1.67331	1.84654
Rab5a	1.44591	1.50648	0.856215	1.44379	1.55269	1.65813	1.29631	1.4383	2.80709
Acin1	1.44569	1.476	1.21559	0.866943	1.24637	1.26029	1.26865	1.28703	2.69199
Znrf1	1.4415	1.4899	0.48415	1.22752	1.15504	1.25985	1.23528	1.18462	1.2492
Actr2	1.44035	1.14914	0.80815	1.33369	1.26934	1.25947	1.50956	1.33441	0.758906
Ociad1	1.43859	1.8142	1.48477	1.91357	1.68475	2.16562	1.55942	1.89756	0.913873
Dnajc7	1.43795	2.0996	0.888229	1.50376	1.99474	1.99283	1.95174	2.17693	1.69501
mt-Nd5	1.4374	1.49467	1.44642	1.7924	1.29049	1.34921	1.33685	1.21977	1.40864
Eif4g1	1.43664	0.981807	1.29159	0.799061	0.792434	0.888694	0.998151	0.774446	1.3108
Smim10l1	1.43313	1.86082	1.23953	1.23338	1.58924	1.38045	1.20497	1.638	1.30773
Mrps17	1.43265	1.24411	1.70478	1.45912	1.29386	1.10323	1.2596	1.23878	1.35344
Tcaf1	1.43217	1.93349	0.617602	1.53984	1.59989	1.28511	1.2766	1.45747	1.83762
Ptpn1	1.43176	1.30956	0.539047	1.08271	0.974706	1.31367	1.07446	0.959419	2.19958
Echs1	1.43153	1.43277	1.61442	1.32501	1.22348	1.31172	1.11472	1.46503	1.63929
Psmc1	1.43137	1.5866	1.17857	1.08137	1.25099	1.59528	1.1177	1.33656	1.78459
Vat1l	1.43131	0.0892638	0.0241527	0.31092	0.293978	0.363042	0.112744	0.128271	0.321475
Gipc1	1.43129	1.16811	1.89313	1.36985	1.4825	0.973152	1.43684	1.33147	1.54777
Samd14	1.43058	2.37085	0.399694	1.71021	1.77219	1.4665	1.55276	1.77362	2.11043
Phf5a	1.42636	1.69764	2.63831	1.43706	1.45507	1.72373	1.69832	1.5456	1.76329
Adrm1	1.42571	1.57162	1.09115	1.18827	1.46239	1.5561	1.46027	1.47982	1.47797
Llph	1.42483	0.938888	1.16894	1.13961	0.959914	1.48144	1.02641	1.24018	1.14223
Midn	1.42424	1.97582	0.862117	1.23083	1.14382	1.73188	1.81135	1.55048	2.27091
Tpm3-rs7	1.42296	0.926019	1.40691	1.18676	1.35544	1.44631	1.06172	1.60323	1.00328
Smim7	1.42078	1.68244	1.69821	1.38264	1.53052	1.56173	1.22107	1.2371	1.19493
Zfp207	1.41872	1.86077	1.39064	1.06299	1.3718	1.23022	1.74626	1.34969	1.32004
Nt5c	1.41701	0.729611	0.749321	0.871513	0.723484	0.981751	0.735345	0.792301	0.728089
Atp6v0e	1.41684	0.616538	1.56935	0.581528	0.80571	1.19427	1.746	0.621731	2.23293
Maz	1.41644	1.41554	1.14503	1.31747	1.6476	1.25277	1.12173	1.21305	1.53656
Kras	1.41619	1.15498	1.15291	1.49572	1.53462	1.48043	1.68569	1.18226	1.01814
Fam60a	1.41605	0.769886	0.323766	0.824459	0.758902	1.06014	0.7688	0.81691	1.74721
Krit1	1.4157	1.01362	0.814768	1.30438	1.02282	0.975304	1.56779	1.00639	2.05242
Cdk16	1.41483	1.19283	1.35494	1.2289	1.45142	0.97414	1.58578	1.20961	1.32052
Celf1	1.4127	1.17555	1.01786	0.913432	1.31167	1.09531	1.12766	1.28691	1.16579
Rbmx	1.41227	1.65695	1.29748	1.30098	1.42599	1.19722	1.96187	1.33859	0.897495
Nipsnap1	1.41148	1.38286	0.331078	1.38519	1.19318	1.43483	1.02301	1.64361	0.984101
Tomm40	1.41131	1.07164	1.27388	0.854581	1.19349	1.13362	1.21629	0.89198	0.947772
Ube2m	1.41035	1.32557	1.46445	1.54808	1.4677	1.32141	1.50413	1.34345	0.99838
Ank3	1.41027	3.65095	0.212108	2.46406	2.15574	2.21109	1.82128	2.56026	1.08487
4933434E20Rik	1.40913	0.995739	0.55155	1.2627	0.949027	0.869796	1.05019	0.826528	1.82792
Arpc5l	1.40907	1.05819	1.40131	1.50326	1.18675	1.29119	1.15119	1.3008	1.03297
Saraf	1.40858	1.13401	0.754841	1.17394	1.3713	1.59491	1.10821	1.14678	1.33599
Mrps33	1.40831	1.49534	2.15285	1.96291	1.88061	1.58554	1.97357	1.47866	1.35073
Ehd1	1.40743	1.08302	0.768365	1.40664	1.3925	1.4532	0.919909	1.35137	1.54632
Bola2	1.40644	1.64929	1.78953	1.72443	1.694	1.30998	1.6625	1.44467	1.38761
Prrc2b	1.40508	1.36758	0.697127	1.37676	1.25043	1.19912	1.24404	1.36347	1.10809
Bloc1s2	1.40248	1.33862	0.82006	1.5806	1.09681	1.22531	1.29593	1.34554	1.28487
Tpm4	1.40078	0.555713	6.8706	0.732457	1.38066	1.01067	2.70496	0.830853	1.59626
Actr1a	1.40041	1.55833	0.789759	1.50878	1.54735	1.34754	1.64566	2.15766	1.40584
Wdr83os	1.39978	0.887601	1.18733	1.23827	0.915062	1.12463	1.13288	0.933355	0.809737
Rap1b	1.39965	0.784929	2.4109	1.29618	1.62818	1.6419	1.34525	1.42663	0.899128
Strn4	1.39949	1.48533	0.604816	0.784058	1.52125	1.29864	1.13432	1.08592	1.88706
Vps29	1.39761	1.51811	1.4877	1.78759	1.6697	2.29231	1.52359	2.09961	1.14927
Thoc7	1.3974	1.6208	1.72609	1.59684	1.52424	1.42018	1.85276	1.05151	1.63747
Ppm1g	1.39713	1.57	0.979703	1.1558	1.48994	1.61682	0.932738	1.46794	1.16342
Tmem14c	1.39258	1.29667	2.20368	1.72237	1.44758	1.59604	1.91415	1.31713	1.52568
Gltscr2	1.39125	1.86281	1.05009	1.36948	1.461	1.5635	1.43043	1.163	1.93261
Mrpl33	1.38969	0.865098	1.72514	1.38248	1.18069	1.10674	1.32458	0.799573	1.50392
Plekhj1	1.38723	1.06192	1.32367	1.09421	1.3768	1.17949	1.26784	0.952146	1.28513
Dbnl	1.38501	1.4078	1.0956	1.31123	1.31119	1.3132	1.22562	1.40041	1.33445
Rab18	1.38402	1.84273	1.31267	1.61767	1.6	1.93014	1.40767	1.80272	1.57161
Cttn	1.37501	1.33802	1.02123	1.04452	1.44729	1.2688	1.33773	1.30032	1.36423
1500011B03Rik	1.37421	1.58598	0.243515	1.50627	1.29097	1.24328	1.50141	1.41246	1.37446
Cnrip1	1.37312	0.936769	0.477848	1.28593	1.25979	1.15352	0.929147	1.29133	1.46844
Fbl	1.37047	1.0734	1.5135	0.865456	0.936426	1.29267	1.10067	0.905809	0.970032
Cbx5	1.3692	1.46577	2.59468	1.40141	1.58478	1.66674	1.40521	1.29901	1.15836
Srp9	1.36913	1.81984	3.35636	1.43752	2.01442	1.67513	2.3912	1.26475	1.62668
Gdap1l1	1.3691	1.6518	0.0563281	1.69206	1.23517	1.25512	0.943604	1.55966	1.33003
R3hdm4	1.36881	1.7269	0.993035	1.23645	1.65404	1.29703	1.12525	1.13386	1.53766
Ppp1r11	1.3671	1.84025	1.24138	1.56389	1.47605	1.67595	1.29231	1.33355	1.72228
Anp32a	1.36553	1.3437	4.79977	1.56297	1.66872	1.67097	2.10557	1.23221	1.93172
Tagln2	1.36431	0.058003	1.22046	1.03492	0.110401	0.464809	2.30446	0.244015	0
Arglu1	1.36393	1.37181	1.59667	1.2198	1.28189	1.41395	1.16398	0.954165	1.10542
Itgb1	1.36382	0.531345	1.02945	0.809826	0.842443	0.711804	1.32113	0.839293	0.797183
Hbb-bt	1.3632	1.24895	1.15436	1.21964	1.27085	1.41527	1.2627	1.24008	1.51154
Apc	1.36139	0.880931	0.304978	0.916805	0.847881	0.67471	0.554438	0.946945	1.21983
Ehd3	1.36023	0.23511	0.0826936	0.18051	0.300822	0.160629	0.366227	0.150273	0.337984
Churc1	1.35963	0.994134	0.92758	1.66103	0.91881	0.830812	0.824663	1.19853	0.578952
Txndc9	1.35892	1.88123	1.69502	1.45746	1.46386	1.83206	1.60925	1.63389	1.40309
Zmat2	1.35884	1.62726	1.45788	1.69028	1.4358	1.47008	1.43541	1.91022	1.67031
Sdhd	1.35855	1.20307	1.88082	1.65596	1.30002	1.39957	1.43603	1.25964	1.37656
Serp2	1.35704	1.17748	0.444062	1.72439	1.49371	1.21836	1.10976	1.36008	0.719516
Ap2b1	1.35688	1.22561	0.769296	1.27958	1.10028	1.10445	1.28215	1.23681	1.281
Ncor1	1.35578	1.32316	1.58845	1.55367	1.53426	1.24733	1.31057	1.21987	1.0741
Psmc4	1.35566	1.9195	1.61094	1.49855	1.40353	2.00282	1.81967	2.01609	1.85718
Ost4	1.35334	1.23214	4.82672	1.98463	1.94379	1.79826	1.69665	1.25739	1.0553
Yaf2	1.35201	1.24899	1.44901	1.28051	1.68075	1.27421	1.33491	1.46965	1.27882
Wac	1.3508	1.31223	0.944465	0.934088	1.43214	0.967746	0.966137	0.970712	1.96178
Thsd4	1.35052	0.0139946	0.0125479	0.0108349	0.0636848	0.0193865	0.0396891	0.0252527	0.491519
Tmem160	1.34872	0.910876	0.916591	1.37825	1.07614	0.995409	1.15673	1.12049	0.472793
A730017C20Rik	1.3486	0.936978	0.0849146	1.64275	0.861873	1.36661	0.155044	1.56578	0.883506
Dnajc5	1.34812	1.29672	0.915592	1.38424	1.32323	1.2854	1.18793	1.31391	1.47896
Cdkn2d	1.34799	0.985226	0.718477	1.76682	1.57219	1.43515	2.45012	2.03644	1.0395
Sept3	1.3479	1.52913	0.120615	1.41319	1.50505	1.40138	1.48276	1.92475	1.41562
Napa	1.34787	1.63495	1.40936	1.34356	1.31781	1.62611	1.87931	1.52226	0.986573
Rangap1	1.3471	1.24956	0.96319	1.30074	1.49333	1.61885	0.908383	1.41993	1.29956
Polr2i	1.3466	1.32905	1.7068	1.35126	1.54681	1.34866	0.911738	1.44481	1.2309
Anapc13	1.34521	1.54377	1.85436	1.55695	1.56048	1.27301	1.03706	1.07513	1.46301
Egln2	1.34291	1.40977	1.20902	1.18128	1.34446	1.10645	1.31891	1.37035	1.92413
Srp54b	1.34233	1.59631	1.34079	1.38034	1.50809	1.21189	1.37835	1.50029	0.919042
Atp1a3	1.34014	1.0936	0.0842027	0.767381	0.863189	0.72776	0.375067	0.510101	0.421363
Igfbp5	1.33999	0.150233	1.15634	1.4829	0.108204	0.0464377	0.228786	0.0161063	0.450356
Smarca5	1.33775	1.25205	1.02292	0.684299	1.15915	0.938025	1.41398	0.765893	2.21265
Sgta	1.33597	1.65945	1.10657	1.461	1.61948	1.70655	1.33995	1.6235	1.48711
Rtf1	1.335	2.24428	1.41851	1.49272	1.54505	2.0302	1.49892	1.57507	2.03459
Gnaq	1.33198	1.29741	0.412913	1.45066	1.23045	1.35178	0.931263	1.45867	0.8865
Ube2k	1.33168	1.50634	1.75316	1.47615	1.5291	1.71374	1.77665	1.78695	1.07202
Rnf145	1.33117	0.947267	0.551962	0.831894	1.29646	0.72164	0.928638	1.25983	1.1879
Csrp2	1.327	0.895309	3.32617	2.45619	1.36219	1.58809	1.74069	1.64574	1.5957
Ccdc124	1.32512	1.45743	1.62167	1.71072	1.45899	1.68579	1.12589	1.71615	0.803532
Glud1	1.32376	1.11855	0.806604	1.13436	1.16162	1.15377	0.96565	0.94412	0.69384
Snn	1.32352	1.76068	0.69374	1.26916	1.50302	1.09036	1.52704	1.58245	1.47765
2210013O21Rik	1.32293	1.20894	0.959794	1.42651	1.08604	1.11387	0.914894	1.09234	0.827627
Pigp	1.32175	1.29789	0.810292	1.4486	1.34311	1.08942	1.25076	1.36663	1.15466
Nr5a1	1.32137	0.0346562	0.0110836	0.0161143	0.0286316	0.0140188	0.0568766	0.0256932	0.109438
Trmt112	1.32128	1.40239	2.02583	1.49506	1.49454	1.64443	1.32074	1.02147	1.89891
Aamp	1.32128	1.54157	1.06518	1.00985	1.2389	1.19028	1.16339	0.947819	1.79457
Dhcr24	1.32115	0.6049	0.696576	0.983028	0.927796	0.630584	0.772804	0.926948	0.51058
Ndufa10	1.32047	2.02822	1.72946	1.87696	1.61931	1.81823	1.96018	1.96553	1.70501
Eif4e2	1.32034	1.02992	1.86207	1.35269	1.14706	1.36473	1.24219	0.952185	1.33117
Tubb4b	1.3203	1.73556	3.14178	2.04625	1.78629	1.56521	2.0433	2.04516	0.997148
Cyb5r4	1.31916	1.42812	0.600958	0.878342	1.23885	0.986638	1.18229	0.917142	1.48345
Scg3	1.31805	1.98393	0.0885091	2.01159	1.40478	1.51576	1.58679	1.81293	1.48253
Ccdc12	1.31683	1.03407	1.32145	0.941209	1.06182	1.10884	1.04806	0.958877	2.59711
Ei24	1.3161	1.15182	1.54627	1.07252	1.36757	1.23281	1.19905	1.11439	1.1391
Lbh	1.316	1.1946	0.316151	1.30604	1.08058	0.922449	0.991031	1.21751	0.794849
1110001J03Rik	1.31437	1.01059	0.850418	1.25658	1.323	1.40768	1.18973	0.911065	0.343008
Med10	1.31426	1.35047	1.49738	1.8556	1.46404	1.98379	1.63286	1.72982	1.96183
Eef1d	1.31365	0.814051	4.37378	0.83494	1.06723	1.22709	0.950529	0.89557	1.10869
Mob4	1.31314	1.76151	1.17095	1.60016	1.50503	1.63363	1.53294	1.49349	2.06075
Kidins220	1.31046	0.992689	0.281091	1.26136	0.968612	0.832811	0.770651	1.1821	1.02025
Nkain3	1.30672	0.265543	0.0532409	0.29716	0.541197	0.536689	0.715924	0.814639	0.130081
Mid1ip1	1.30555	0.346158	0.602707	0.579027	0.535553	0.479946	0.414732	0.626049	1.05897
Drg1	1.3035	1.45623	0.963374	1.38606	1.22289	1.39575	1.12154	1.54921	1.54046
Ufc1	1.30273	1.49334	1.39025	1.60185	1.35642	1.35133	1.17267	1.32434	1.2642
Ddx3x	1.3019	1.16518	1.35746	1.07918	1.12546	1.05469	1.47775	1.20553	1.39162
Ncs1	1.30146	1.70324	0.523479	1.57726	1.44244	1.55903	1.32625	1.93355	0.893172
Idi1	1.30075	0.908543	0.860312	1.54219	1.64677	1.70298	1.35145	2.03344	0.336271
Ppa1	1.30068	1.35762	1.36324	1.2506	1.24137	1.54181	1.41789	1.38906	0.962229
Sox2	1.29843	0.376009	0.0265674	0.0182083	0.171277	0.0238758	0.0196256	0.01783	1.05231
Ccni	1.29768	1.46849	1.24897	1.40945	1.46972	1.31833	2.1707	1.69657	1.91348
Ppig	1.29765	1.32074	1.8637	1.17299	1.63336	1.19597	1.68423	1.24193	0.956449
Slc24a5	1.29681	1.32508	0.587182	1.40886	1.24624	1.60397	1.41162	1.15537	1.29908
Pcbd1	1.29678	0.46129	0.282389	1.4117	0.929807	0.361456	0.475911	0.81948	0.763894
Chga	1.29587	0.707227	0.0198724	0.701145	0.624238	0.548486	0.623237	0.816855	0.757669
Unc119	1.29306	1.10336	0.713086	1.00151	1.1331	0.943838	0.980427	0.823612	1.34642
Ndufs3	1.2925	1.89184	1.57189	1.87353	1.41283	1.68369	1.3477	1.63039	1.79901
Cox14	1.29223	1.44282	1.14685	1.63761	1.5003	1.44838	1.21671	1.18004	1.59791
Ssr4	1.29169	1.36114	2.30313	1.64278	1.20776	1.43447	1.05535	1.18956	0.998218
Lamtor1	1.29009	1.34425	1.68445	1.35378	1.37281	1.6562	1.16981	1.14296	2.19653
Hes6	1.2896	0.952385	0.532785	1.0899	1.33527	1.09246	2.15135	1.02414	2.3561
Mpc2	1.28951	1.45669	1.61955	1.8997	1.3815	1.26555	1.17769	1.58592	1.10265
Zfp422	1.28845	1.48463	1.49931	1.0187	1.50021	1.53389	1.21964	1.14599	2.32844
Tulp4	1.28831	1.48522	0.355634	1.18263	1.12222	1.23701	1.13725	1.09931	1.2543
Slc25a51	1.28563	0.885029	0.767231	1.00012	0.843755	0.953799	1.06481	0.96899	1.64901
Ubxn6	1.28169	1.54107	0.730322	1.25882	1.57953	1.28634	1.17339	1.23722	1.32573
Ntan1	1.28116	1.15239	1.53921	1.1615	1.41686	1.1236	1.11592	1.51164	1.22024
Sdcbp	1.28068	2.25449	1.33838	1.45654	2.18622	2.94469	1.91493	2.27856	1.39329
Cited2	1.28048	5.00394	0.7357	1.15017	2.27827	1.45657	4.38432	2.94464	0.756782
Cyfip2	1.27966	1.01199	0.201465	0.822647	0.999367	0.561021	1.29958	1.09739	1.10624
Ctbp2	1.27867	1.7945	0.745795	0.815809	0.969129	0.774449	2.55701	0.700745	1.3798
Dtx3	1.27762	1.9409	0.863021	1.26801	1.60812	1.67081	0.801978	0.939843	2.29796
Vps72	1.27666	1.83035	1.02876	1.15084	1.21053	1.40865	1.35635	1.49105	2.86373
Dbi	1.27275	1.53803	6.76388	2.45198	2.39622	1.71671	1.92659	1.48115	1.44788
Dpp3	1.27164	1.33514	0.633502	0.893399	1.13629	1.23989	0.968393	1.10698	1.11094
Gtf2i	1.27015	1.08047	0.959955	0.728205	0.960207	0.627195	0.789202	0.639386	1.36689
Mcts1	1.27004	1.55713	0.659313	1.06506	1.02497	1.72454	1.30039	1.68336	1.54843
Camta1	1.26903	1.5122	0.729278	1.2482	1.38964	1.63514	1.19436	1.08238	2.19347
Mtdh	1.26853	1.19571	1.62798	1.2393	1.11147	0.969064	1.35764	1.04757	1.09952
Sf3b5	1.26775	1.32168	2.64696	1.29226	1.39338	1.58855	1.41436	1.319	1.08006
1700037H04Rik	1.26748	0.577893	0.416715	1.58352	0.796981	0.764565	1.30716	0.989975	1.02267
Rsl1d1	1.2663	1.06919	1.09681	0.846817	0.944176	1.20769	0.97857	0.923305	1.29929
Mrpl28	1.26465	1.17546	1.8251	1.41842	1.33681	1.24124	1.36733	1.3188	0.960059
Tra2a	1.26427	2.02926	1.02409	1.39293	1.42597	1.66798	1.41818	1.50785	1.54456
Ict1	1.26384	1.26244	1.29798	1.35377	1.18064	1.43418	1.05867	1.25183	0.827569
Chd7	1.26373	1.06731	0.840444	1.5659	1.30746	0.958817	1.49134	1.11857	2.51652
Cbx1	1.26277	2.40965	2.622	1.44681	1.67114	2.22235	2.17571	1.63684	1.95856
Map4	1.26215	0.833573	0.766492	1.30889	1.20107	0.806383	1.26124	1.18631	0.876477
Srsf10	1.26141	1.31872	1.52375	0.956238	1.01364	1.20331	1.15776	0.950143	1.65353
BC005537	1.26061	1.14081	0.608402	1.17684	1.20537	1.2325	1.29278	1.37502	1.23321
Cab39	1.26051	1.08869	0.61809	1.20487	1.17746	0.941169	0.978979	1.10464	1.58443
Adipor1	1.26048	0.815715	0.671465	1.13902	1.1313	0.862826	1.18786	0.721895	1.33454
Mrpl18	1.25984	1.72849	2.22913	1.56698	1.5318	1.55202	1.29827	1.48905	1.02077
Map6	1.25857	0.900152	0.248997	1.7488	1.17052	1.51844	0.827356	1.11684	1.21068
Ptprs	1.25818	1.43413	1.00082	1.35863	1.54361	1.45526	1.36945	1.06328	1.70545
Praf2	1.25732	1.296	1.0851	1.75708	1.31843	1.10074	1.27078	1.27117	0.793624
Coprs	1.25706	1.05756	0.42208	1.0904	1.01703	0.947605	0.678569	1.18821	0.859091
Mapk1	1.25527	1.27487	0.956779	1.36841	1.12048	1.45592	1.12432	1.41458	1.81866
Ralbp1	1.2549	0.910485	1.13691	1.00715	1.12604	1.01399	1.27385	1.09012	0.899805
Tpr	1.25422	1.20902	1.58898	1.03748	1.16315	1.11713	0.993069	0.922132	1.15904
Maea	1.25366	1.56059	1.06076	1.25159	1.36194	1.28994	0.992396	1.60444	1.5104
Trappc2l	1.24832	1.68471	0.792265	1.73442	1.41476	1.96755	1.41889	1.56603	1.03195
Ythdf2	1.24727	1.65921	0.875166	1.07098	1.22886	1.52354	1.25429	1.33792	1.73862
Sbno1	1.24627	1.16996	0.617653	0.904078	1.03408	0.990967	0.831085	1.08024	0.792291
Blcap	1.24619	1.48907	0.774734	1.06583	1.12378	1.20266	0.578358	1.06058	1.67388
Dctn1	1.24601	0.96189	0.441893	0.722366	1.3137	0.754771	2.17178	1.29124	0.600627
Vasp	1.24516	0.498718	1.2048	0.698728	0.841051	0.634675	0.758558	0.62296	1.13269
Hnrnpl	1.24437	1.26717	1.06077	0.883286	0.952682	0.944638	1.2392	0.994615	1.9619
Rps27rt	1.24403	1.25088	1.70198	0.954277	1.15726	1.09726	1.20807	0.853287	1.42654
Actr1b	1.23993	0.790818	0.698845	0.942607	0.99777	0.886426	1.33771	0.728327	1.18296
Rraga	1.2399	2.03403	0.877241	1.5461	1.78182	2.15649	1.16693	2.02048	0.895564
Tcf7l2	1.23936	0.0520752	0.354742	0.0460719	10.3745	0.142408	0.116262	0.125128	0.75341
Myc	1.23523	0.152571	0.158752	0.609448	0.088756	0.895152	0.114166	0.52838	0.0569061
P4hb	1.23467	0.909875	3.15243	0.975375	1.12209	1.04918	1.13808	0.711534	0.664956
Gnai3	1.23379	0.987462	1.26815	1.13617	1.05792	0.983324	1.50229	1.43134	1.48586
Tmed9	1.23373	1.61414	2.62343	1.51764	1.43425	1.68353	1.3851	1.42566	1.11479
Mycbp2	1.23325	0.987518	0.531875	1.12486	0.99419	1.08002	1.60188	1.21446	0.81965
Srrm1	1.23027	1.13436	1.38477	0.991879	1.11322	1.03609	1.22948	0.935789	1.52357
Banf1	1.22958	1.04392	2.12706	1.14339	1.20157	1.47867	1.28762	1.06105	0.928582
Cox20	1.22835	1.12682	0.883242	1.43718	0.889159	0.901428	0.991583	0.549857	0.954216
Vti1b	1.22793	1.13139	0.973858	1.29988	1.21972	1.25569	1.05659	1.0428	1.10795
Psme1	1.22792	1.17448	0.846326	1.01634	1.17625	1.30831	0.770793	1.42633	0.849111
Mthfd2l	1.22787	1.21372	0.495198	0.926771	1.2995	1.46923	1.22354	1.16523	2.35568
Chgb	1.22633	0.928064	0.0357188	0.427138	0.498586	0.5427	0.482062	0.830699	1.0138
Dnajc8	1.22491	1.52644	1.50837	1.56206	1.2112	1.61743	1.39647	1.64503	1.23806
Nrxn1	1.22463	0.869961	0.089951	0.830867	1.21402	0.657421	0.731293	0.74695	0.907987
Snrpa	1.22456	1.66842	1.75739	1.25403	1.3661	1.80538	1.51392	1.53977	1.14033
Csk	1.22365	1.25426	0.897833	1.37853	1.5705	1.45458	1.91382	2.20693	0.895967
Wbp1	1.22302	2.80534	1.34049	1.85862	1.84547	1.55319	1.89916	1.93136	2.39018
Rnd3	1.22261	1.44234	0.607965	0.716622	1.03117	1.53161	1.0511	1.2244	0.271188
Tpgs2	1.22233	1.40732	1.19112	1.65194	1.4347	1.21102	1.24282	1.59715	1.27557
Lsm1	1.21901	1.16299	1.12587	1.15555	1.22579	1.18859	1.23861	1.00231	1.07894
Hnrnpd	1.21791	1.59126	2.29932	1.21582	1.37345	1.425	1.31267	1.09767	1.6015
Srp19	1.21661	1.13525	1.70405	1.19029	1.23209	1.05083	1.20654	1.17531	1.04901
Nktr	1.21493	1.26829	1.13129	1.241	1.21652	1.33622	1.09273	0.981024	1.2485
Fam114a2	1.21452	1.03591	0.455709	0.735468	0.919815	0.962177	0.871963	0.794822	1.09099
Aco2	1.21386	2.01793	0.707763	1.20425	1.4437	1.22525	1.24573	1.25354	1.29942
Snrnp27	1.2135	1.26791	1.49771	1.10277	1.23145	1.21339	1.23917	1.15357	1.46777
Gm9843	1.21286	1.13756	1.527	1.22127	1.12863	1.12925	1.41128	0.918379	0.904887
Cnpy2	1.21225	1.59669	2.70486	1.34341	1.18036	1.29059	1.2632	0.8956	1.35518
Strbp	1.2117	1.34705	0.388692	1.12229	2.54067	1.09097	1.38619	1.55388	1.94494
Anapc16	1.21007	1.14227	1.19112	1.43811	1.32302	1.1332	1.31438	1.11822	1.22236
Lin7c	1.20988	1.41588	0.400778	1.06143	1.20225	1.38747	1.02398	1.47932	0.935338
Tox2	1.20941	0.159347	0.0263035	0.26645	0.149291	0.181231	0.072816	0.125389	2.73867
Kcnq1ot1	1.20866	1.16968	1.35058	0.91149	1.07855	1.20814	1.3371	1.35303	1.51448
Cdc42se2	1.2069	0.717911	0.621579	0.662907	0.971486	0.751009	0.791732	0.761619	1.08771
Kcnh2	1.20679	0.55146	0.0595986	0.357985	0.336629	0.412646	0.149847	0.179095	0.845081
Gatad1	1.20516	0.800783	0.906089	0.998631	1.37562	1.03478	1.01139	0.699062	0.809002
Tm2d1	1.20502	1.09864	0.813756	1.5004	1.19869	1.56209	1.20803	1.09458	1.30937
Fam220a	1.20373	1.22094	0.947935	1.06178	1.29479	1.35249	1.39874	1.37541	1.34729
Impdh2	1.20318	0.710761	2.32685	0.676311	0.921353	1.12248	0.727297	0.543061	0.72679
Snrnp70	1.20285	1.40689	1.37628	0.761497	1.13012	1.13558	1.35134	1.05464	1.83909
Psmc6	1.20134	1.7609	1.16353	1.35211	1.51013	1.92946	1.56611	1.76996	1.42237
Adh5	1.20083	1.76372	1.20755	1.35826	1.21211	1.6325	1.21909	1.42529	1.10991
Tmem30a	1.1994	0.989842	0.64107	0.830106	1.43762	0.86923	1.02705	0.885974	1.37626
Sema6a	1.19796	0.463968	0.782161	0.511505	0.621164	0.435751	1.00855	0.529376	0.957228
Psmd1	1.1957	1.4938	0.722766	0.706951	1.33246	0.938203	1.11738	0.955743	1.28778
Sf3b1	1.19516	1.80249	1.3402	1.19509	1.3265	1.42744	1.38968	1.52606	1.47588
Csnk2a1	1.1945	1.13914	0.707697	0.951514	1.09653	0.977678	1.06603	1.04995	0.997947
1810022K09Rik	1.19405	0.903562	0.797479	1.27379	0.966926	0.981416	0.963369	1.09094	1.4491
Stxbp1	1.19399	1.18435	0.249282	1.0644	1.24027	1.18826	1.36798	1.23952	0.456649
Pnisr	1.19399	1.72728	1.06555	1.09381	1.47832	1.43069	1.1753	1.23639	1.5806
1110065P20Rik	1.19313	0.979608	1.00499	1.2983	1.07048	0.823114	1.02123	0.777491	1.4158
Sec11a	1.19299	1.27967	2.63716	1.42319	1.07845	1.44935	1.50715	1.29028	0.913986
Glyr1	1.19285	1.49158	0.805308	1.03671	1.31925	1.2675	1.04838	1.09342	1.27861
Srpk1	1.19211	1.22325	0.726014	0.994811	0.970754	1.27638	1.04546	1.00716	1.59576
Sdhc	1.19209	1.37658	1.4073	1.91029	1.50031	1.47759	1.21929	0.969643	0.975472
Bhlhb9	1.19208	0.849303	0.554981	0.61914	0.937098	0.767817	0.737296	0.70098	1.48315
Mllt3	1.192	0.930855	0.500276	1.01235	0.486671	0.718638	0.253255	0.695718	0.24144
Magel2	1.19196	0.295624	0.038834	0.263446	0.181519	0.119943	0.161603	0.16071	5.06923
Brinp1	1.19103	0.39945	0.0183429	0.375366	0.148262	0.328237	0.0568339	0.058727	0.431604
Cacnb3	1.19043	1.52945	0.396469	1.66935	2.60097	1.70785	1.95825	2.51525	1.99673
Ssrp1	1.18866	1.32314	1.91139	0.654336	1.21585	0.992321	1.05157	0.861601	1.0534
Cend1	1.18822	0.860692	0.104271	1.95089	1.02444	0.670636	1.22738	1.15294	0.788263
Tln1	1.18819	0.825021	0.692582	0.969969	0.954139	0.887117	1.06932	1.08073	0.698101
Rbbp6	1.18653	1.31634	0.879904	0.83064	0.887508	1.09773	0.943841	1.04781	1.56575
Hdac3	1.18525	1.078	1.04707	0.814818	1.06699	0.922923	1.06922	1.15454	1.31365
Snx3	1.18431	1.37096	3.27316	1.68845	2.01534	2.36617	1.69204	1.31045	0.648896
Cisd1	1.18406	1.96124	0.828921	2.2579	1.95032	1.79548	1.94681	1.63277	0.560096
Ssr2	1.18398	1.63394	3.92959	1.63137	1.33362	1.99327	1.76744	1.28434	1.13797
Rp9	1.18386	0.659813	1.01912	0.6602	0.924855	0.757795	0.745639	0.920497	0.53222
Mageh1	1.18209	1.58477	0.813211	1.42575	1.37134	1.68244	0.791251	1.40877	2.03102
Rbms1	1.18195	0.453386	2.74108	1.74672	0.46618	0.780611	1.77355	1.2879	0.754442
Actl6b	1.18123	2.42297	0.0842041	1.50819	2.00706	2.12519	1.12442	2.50154	1.00452
Bcl11a	1.18067	1.35134	0.56226	0.549839	0.241573	0.360955	0.272109	0.0980733	2.16491
Dpy30	1.17956	1.0529	2.11328	1.69527	1.54842	1.1986	1.46189	1.27503	1.08894
Prdm12	1.17812	0.00733044	0.0280938	0.0155871	0.0346751	0.0203439	0.130081	0.150547	0.661502
Sptan1	1.17727	0.837491	0.81063	1.07427	0.931721	0.746131	1.19051	1.01363	0.71677
Rab5c	1.17697	1.3819	1.10143	1.14065	1.34633	1.53892	1.46439	1.23919	1.04875
Ucp2	1.17685	0.358891	1.06082	0.965999	2.68301	0.571924	1.98671	2.04039	1.08263
Srebf2	1.17452	0.744446	0.525856	0.858986	1.22425	0.674566	1.1398	0.981492	1.14238
Mrps18a	1.17447	1.1641	1.28848	1.33436	1.06572	1.0859	1.00319	1.21768	1.0727
Idnk	1.17363	0.946388	0.419792	1.38008	1.01011	0.841809	0.925281	0.91869	1.56125
Aimp1	1.17095	1.29855	1.37352	1.19882	0.945535	1.35173	1.16856	1.15023	1.12043
Lamtor2	1.17089	1.65082	1.97787	1.82622	1.54273	1.40055	1.2937	1.40981	1.03473
Ssbp4	1.17017	1.00283	1.07449	0.795686	1.41871	2.05062	0.695093	1.23992	1.17604
Zc2hc1a	1.1666	1.14697	0.507864	1.21427	1.34774	0.789689	0.948327	1.46086	0.828923
Grb2	1.1666	1.56378	0.654569	1.67894	1.31939	1.40325	1.30366	1.6691	1.31482
Acvr2b	1.16635	1.55669	0.236951	0.67958	1.20357	1.15883	0.729328	0.752588	2.44447
Atp6v1d	1.16604	1.61049	0.792152	1.51596	1.63198	1.66569	1.26125	1.74727	1.26781
Spag9	1.16565	1.33478	0.406875	1.01311	0.905579	0.896992	0.949618	0.788306	1.65443
Sept6	1.1644	2.24077	0.630282	1.34023	1.26742	1.31501	1.86528	1.53589	1.10289
Rbp1	1.16395	1.14114	3.28996	4.22032	0.388464	0.468531	0.663846	1.02736	1.24034
Top2b	1.16394	1.42398	0.866534	0.940418	1.14596	1.00474	1.06742	1.16034	1.2352
Srp72	1.1626	1.30711	0.966848	0.739177	0.988976	1.03982	1.02135	0.873519	0.848313
Zfand6	1.16162	1.52415	1.38679	1.23789	1.46889	0.994988	1.52829	1.47462	1.81991
Cops8	1.16157	1.19438	1.22296	1.14905	1.12967	1.29139	1.21984	1.43692	1.52055
Por	1.16135	0.647129	0.69474	0.445252	0.792393	0.526282	0.399111	0.778902	2.44883
Sra1	1.16033	1.2343	1.24006	1.14383	1.16531	1.27495	1.03941	1.10631	1.50664
Setd3	1.15943	1.11244	0.641072	0.898761	1.02583	0.954406	1.04249	0.907565	1.14882
Btg1	1.1588	1.87298	1.23953	1.21308	1.1588	2.38426	1.48099	0.858178	5.15081
Arl1	1.15677	1.18329	2.23957	1.43522	1.33527	1.25874	1.41185	1.39014	1.40108
Mtx2	1.15658	1.3947	1.46655	1.61838	1.06729	1.26092	1.63946	1.86881	0.963754
Gde1	1.15635	1.4313	0.760053	1.25872	1.46301	1.36817	1.36584	1.66636	0.701017
Odc1	1.15583	0.79995	1.90219	0.513384	1.22581	0.85402	0.922002	1.07326	0.784431
Med30	1.15557	0.91959	0.659474	1.20457	0.941781	0.985525	0.760275	0.757628	1.09519
Nucks1	1.15414	1.67421	3.17943	1.70337	1.89653	1.65553	1.51988	1.52673	1.19419
Itm2b	1.15408	1.86049	4.83968	3.08234	4.21842	7.23381	4.60308	4.80882	1.89844
Ssr3	1.15336	1.10122	2.67933	1.21379	1.41788	1.18172	1.22561	1.15154	1.14105
Kdelr1	1.15245	1.48105	2.54069	1.45985	1.46425	1.32622	1.11693	0.957798	1.1421
Ndufs7	1.15107	1.26219	1.53335	1.62248	1.39105	1.48977	1.41688	1.48999	1.25936
Lsm3	1.15073	1.02735	2.42889	1.06865	1.371	1.09828	1.36579	1.48397	1.35013
Shtn1	1.14964	0.0816802	0.0208777	0.302698	0.0900854	0.126553	0.100088	0.188276	0.936138
Mrpl51	1.14901	1.16069	2.10293	1.40903	1.36596	1.32464	1.25158	1.21593	1.17113
Sarnp	1.14762	1.27042	1.488	1.10237	1.1208	1.6476	1.40859	1.44448	1.06916
Hp1bp3	1.14758	1.43267	0.87299	0.810497	1.17	1.26899	1.01185	0.993047	2.05983
Ahsa2	1.14735	1.18668	0.789511	1.10861	1.16328	1.06448	1.30776	1.46828	2.80416
Sept11	1.14703	0.662047	1.86524	1.05718	1.05104	0.902026	0.827154	1.32047	0.718526
Eny2	1.14694	1.6179	3.03933	1.60822	1.51216	1.59564	1.82518	1.77522	1.43355
Faim	1.14673	0.971098	0.951471	0.825754	0.908375	0.96674	0.667867	0.879142	0.780013
Fnta	1.14609	1.3683	0.852925	1.04007	1.0816	1.20553	0.819046	1.12218	1.03504
Scp2	1.14585	1.44841	1.37192	1.17603	1.08422	1.38786	1.15015	1.14976	1.33968
Idh2	1.14574	1.36302	2.67583	0.820271	1.31288	2.06228	0.685447	0.885242	1.47029
Spin1	1.14508	0.704294	0.886346	1.1212	0.997941	0.696651	0.8748	0.900328	1.09691
Enho	1.14344	1.05022	0.31484	0.830908	0.704509	0.602113	0.797812	0.970479	0.795658
Kansl2	1.14141	1.15996	0.966325	0.921754	1.29086	1.04873	1.2948	1.0899	1.0763
Rnf126	1.14119	0.732565	0.800202	0.691183	0.755213	0.725225	0.883379	0.747637	1.2305
Mrpl57	1.14074	1.02072	1.01953	1.22236	1.15652	1.06443	0.957438	0.979367	0.878488
Psmd13	1.13993	1.6413	1.45839	1.49427	1.47412	1.71644	1.25068	1.77519	1.71621
Hnrnpm	1.13977	1.75372	1.76142	0.756138	1.36048	1.18799	1.26718	1.12861	1.69017
Fam96a	1.13888	1.00432	1.85456	0.922174	1.3546	1.13839	1.20865	0.891082	0.98631
Hspa4	1.13872	0.958718	0.850109	0.686037	0.920381	0.783388	0.847989	0.792404	0.933613
Rbmxl1	1.13737	1.94616	1.66282	0.792303	1.41343	1.60994	1.52632	1.34455	1.43055
Atp1b1	1.1356	1.01929	0.0792534	1.34327	1.67827	6.2085	0.763299	0.812938	0.514542
Tm9sf3	1.13364	0.847567	1.23358	0.769464	0.903903	0.901543	0.82428	0.609349	0.87131
Tox3	1.13355	1.26281	0.157027	0.0587986	0.752378	0.956812	0.208102	0.233385	1.34733
Arl2	1.13281	1.26815	0.671999	1.26781	1.20726	1.13356	0.683894	1.0555	0.962449
Trim27	1.13249	0.588092	0.993167	0.505957	0.608413	0.556373	0.75608	0.528518	0.973876
Txnl4a	1.13222	1.09809	1.26509	1.24572	0.953168	1.21635	1.30052	1.24294	0.657831
Eif3b	1.13193	0.75595	0.890001	0.670972	0.919057	0.935072	0.858203	0.72787	1.04023
Chmp1a	1.12992	1.13286	0.695698	0.951603	1.06407	0.996635	0.832431	1.29599	1.28583
Cdc26	1.12938	1.30123	2.27542	1.13116	1.27525	1.04431	1.32402	0.888942	1.75261
Cisd2	1.1293	1.29974	1.3747	1.21461	1.37668	1.28476	1.21056	1.00557	1.17226
Tbrg1	1.12734	0.641178	1.68778	0.758162	0.710341	0.764911	0.812407	0.831176	0.942112
Smarcd1	1.12519	1.71806	0.885676	1.18928	1.37154	1.26518	1.29089	1.2706	0.97963
Ssbp2	1.12489	0.859217	1.09726	0.638077	1.24642	1.52918	0.599696	0.471507	3.8679
Scrn1	1.12433	0.433053	0.144111	0.972071	0.78588	0.782372	0.941305	1.1785	1.11536
Slc39a6	1.12424	0.924091	0.474838	0.864398	0.776232	0.903728	0.670763	0.845395	1.28152
Csnk1d	1.12367	1.10557	0.726319	0.69944	0.944879	0.936006	0.905262	0.800056	1.57581
Btbd2	1.12362	0.730093	0.890169	0.836313	1.02323	0.779237	1.05759	0.6731	0.896612
Comt	1.12144	0.73802	1.139	1.10214	0.869834	1.13512	0.943426	0.778544	0.952025
Timm17a	1.12001	0.762158	1.28236	0.846748	0.987843	1.11801	1.34739	0.892703	0.737804
Ahsa1	1.11917	1.05573	1.07226	0.959906	0.994566	1.40611	1.01847	1.0462	0.705354
Pop5	1.11899	0.984957	0.414045	1.11821	0.785012	0.677473	0.689171	0.802583	0.630597
Chp1	1.11821	0.5676	0.682466	0.849223	0.83792	0.705293	1.06694	0.707047	1.06104
Paip1	1.11767	1.19253	0.224501	0.921873	1.03962	1.01186	0.65328	0.866058	1.11307
Nop56	1.1166	1.20741	0.907939	0.825003	0.92818	1.21857	1.05134	0.96146	0.696316
Ola1	1.1155	0.640063	1.01429	0.756374	1.00306	0.840131	1.25012	1.03529	1.05028
Itm2c	1.11543	1.0501	1.80557	0.231795	0.913558	0.735564	0.559722	0.913027	1.59985
Cyb5r3	1.11472	1.61907	1.74818	2.03871	1.64206	1.62599	1.72926	1.56866	0.995518
Nrep	1.11447	4.4123	4.63485	3.80112	2.40204	2.50239	2.84497	2.79032	1.45355
Oxct1	1.11401	1.13112	1.64092	1.2217	0.909138	0.775625	0.461791	0.949943	0.479385
Tmem176b	1.11361	1.10917	1.3563	1.74665	1.38006	1.43911	0.397569	0.694679	1.75497
Lamtor4	1.11232	1.10252	1.2177	1.62872	1.08042	1.03661	1.26326	0.906798	0.99351
Lsm5	1.11107	1.00326	2.94232	1.11526	1.32009	1.122	1.37814	1.26745	1.17718
Igfbp2	1.11089	0.345099	7.71151	1.48068	0.921641	0.535432	1.85273	1.74932	2.2419
Atad1	1.10931	1.41096	0.454925	0.974671	0.949173	1.04366	0.898389	1.06661	0.531824
Peg10	1.1093	0.219351	0.131244	0.0619506	0.196404	0.419962	0.259778	0.352144	3.13489
Fam134a	1.10868	1.44019	0.332573	1.01569	1.35663	0.975972	0.838776	0.926995	1.47367
Lypla2	1.10817	0.818761	0.501464	0.710342	0.977132	1.04469	0.942544	0.690006	0.590158
Ubap2l	1.10752	0.939881	1.13317	0.723664	1.1222	0.906973	0.874078	0.71855	1.20787
Cpsf6	1.1068	1.19377	1.06385	0.945213	1.05944	0.87702	1.09546	0.987266	1.56603
Ppp2cb	1.10675	0.738724	0.881852	0.936643	1.02243	0.918842	0.886718	1.04039	1.31801
Polr2e	1.10581	1.19631	2.07332	0.969249	0.947323	1.44621	1.21404	0.976097	1.00211
Bend5	1.10576	0.728598	0.237181	0.788912	0.615047	0.821589	0.749217	0.631977	0.839537
Deb1	1.10481	1.09873	0.586025	0.99592	0.93029	0.791023	0.786883	0.646705	0.70834
Igf2bp3	1.104	1.08105	1.14534	0.687882	1.07058	1.08159	0.851841	0.789615	1.58958
Sh3bp1	1.10397	1.0545	0.442059	1.14007	1.08833	1.31964	0.782696	1.26464	0.746339
Hsd17b10	1.10335	0.763308	1.89819	1.10112	0.896954	0.59688	0.781588	0.914794	0.860008
Ube2g1	1.10321	1.61335	1.11848	1.31191	1.75215	1.48835	1.49999	1.55957	1.24542
Klhl13	1.10216	0.880289	0.302471	0.964095	1.22588	0.471281	0.26105	0.693127	1.33633
Timm17b	1.10215	1.26471	1.43327	1.04064	1.25432	1.14425	0.998453	1.08001	0.90226
Eif1a	1.10029	0.804314	1.04055	0.853843	0.874526	1.00998	0.626635	0.885427	0.463657
Ogfr	1.10015	1.25399	0.71252	0.696545	1.03681	0.868326	0.88144	0.765288	1.71904
Ilk	1.1001	0.643173	1.97869	0.84965	0.93597	0.927722	0.99856	0.794279	0.999535
Blmh	1.10003	1.5216	1.10165	1.13935	1.25074	1.32856	1.16639	1.43314	0.928617
Polr2g	1.09975	1.12785	1.11525	1.12932	1.03819	1.12737	1.17905	1.04904	0.906893
Sap30	1.09856	1.11372	0.331387	0.99973	0.849804	1.28417	1.07474	0.942239	0.828804
Auts2	1.09852	1.10841	1.36622	1.42017	1.41209	1.24884	0.72255	1.38289	0.894903
Slc38a2	1.09731	1.27222	0.483918	0.810639	0.909672	0.92748	1.18972	0.967649	1.38425
Prmt8	1.09691	0.705508	0.0364035	0.531428	0.312377	1.36972	0.260178	0.440929	0.24631
Cope	1.09616	1.70167	1.6683	1.47441	1.36148	1.8158	1.08021	1.60682	1.35945
Prpf40a	1.09548	1.08812	1.17536	0.821537	1.02511	1.22365	1.26511	0.932073	1.43818
Dync1h1	1.09534	0.974076	0.581779	0.94911	0.928031	0.888691	1.18369	0.902644	1.45773
Cops4	1.09507	1.28324	1.24712	1.12553	1.1182	1.27743	1.253	1.51727	1.27014
Fam69b	1.09422	1.20299	0.490346	1.43005	1.12773	0.968903	0.587448	1.08729	0.830829
Mrpl43	1.09374	1.2701	1.02814	1.30568	1.11291	1.36583	1.01087	1.16337	1.30688
Supt4a	1.09308	1.50511	1.49993	1.32491	1.40107	1.43852	1.45143	1.224	1.1915
Wdr1	1.09296	0.497183	1.27142	0.467365	0.717885	0.784788	0.841445	0.534382	0.957278
Add2	1.09111	0.850626	0.099345	0.980869	0.79119	0.766249	0.820263	0.872173	1.19214
Spsb4	1.09097	0.677038	0.726536	0.971865	0.531737	0.5892	2.46472	1.38118	1.73825
Bub3	1.08921	1.43084	2.41156	0.979398	1.1756	1.27152	1.29692	1.18855	1.70494
Ergic2	1.08834	1.47014	1.12758	1.52318	1.26821	1.19834	1.24336	1.09987	1.41015
Bclaf1	1.08626	1.16898	0.866236	0.688537	1.07142	0.854029	0.71986	0.738178	1.27594
Abracl	1.08611	0.861018	3.16511	0.669072	1.02639	1.10627	1.54872	0.792926	0.889273
Cltc	1.08305	0.839211	0.777817	1.01998	1.05404	1.09418	0.876988	1.0502	0.591314
Copz1	1.08259	1.29231	1.75982	1.40933	1.28213	1.24751	1.45179	1.41423	1.48071
Tspyl4	1.08242	1.19588	0.172435	1.21711	1.10832	0.965846	0.792774	1.1819	0.647462
Ybx3	1.08216	0.405178	1.04255	0.56755	0.696379	0.735262	0.704893	0.592437	0.225969
Ndufb4	1.08104	1.3389	2.44249	1.64204	2.16293	2.38164	1.34825	1.26815	1.76064
Armc1	1.08043	1.04158	1.1545	1.1017	1.09037	1.08602	1.25099	1.31345	1.2147
Slc25a1	1.0786	0.833192	0.484042	1.39166	0.963639	0.978998	0.440268	0.746593	0.535236
Vcan	1.07727	0.471115	1.93255	0.244302	0.396654	0.242574	0.406844	1.32759	0.241519
Rpl23a-ps3	1.0762	1.09124	1.86337	0.99877	1.21078	1.02057	1.12403	0.757258	0.834099
Syncrip	1.07615	1.15275	1.23193	0.905294	1.06578	1.09487	1.11418	1.05845	1.34549
Spop	1.07576	1.15815	0.9123	1.1832	1.38102	1.24867	1.30195	1.2363	0.917781
Pum2	1.07568	0.923128	0.788306	0.722085	0.968222	0.967742	0.712813	0.816796	0.987164
Sccpdh	1.07557	0.885049	0.337865	1.3122	0.876102	0.841859	0.931967	0.767419	0.486749
B230219D22Rik	1.07512	1.19369	1.15348	1.08071	1.11364	1.30112	1.27415	1.10721	0.808238
Rnf11	1.07447	0.99059	0.496046	0.916333	0.978047	0.99804	0.860612	0.995059	1.44586
2410002F23Rik	1.0739	1.22352	0.631233	0.906307	0.72638	1.03963	0.480922	0.877021	1.25767
Imp3	1.07215	0.558971	1.06129	0.717305	0.555377	0.770145	0.874407	0.96361	0.788564
Slc30a9	1.0715	1.05652	0.411747	0.814828	0.928808	0.736176	1.05504	0.870386	1.33483
Kdm2b	1.07105	1.37302	0.75779	0.699792	1.26305	1.15507	0.960762	1.01467	1.44334
Fundc2	1.0705	0.705336	1.81611	0.935565	1.10008	0.817019	1.08571	0.715856	1.00207
Pa2g4	1.06993	0.865217	1.37861	0.871942	0.910413	1.05469	1.07661	0.835164	0.462585
l7Rn6	1.06713	0.902062	1.28468	0.955498	1.06946	0.849613	0.820118	1.01124	0.890907
D1Ertd622e	1.06679	0.381905	0.229871	0.430465	0.637327	0.633339	0.532132	0.822736	0.383518
Nsfl1c	1.06671	1.17541	1.27776	1.21483	1.06712	1.53475	1.07224	1.48834	0.982261
Psmc3	1.06539	1.47909	1.68264	1.2854	1.42152	1.66543	1.4008	1.55718	1.19752
Prrc2c	1.06498	1.26665	1.5728	0.93786	0.973657	0.904031	1.03407	0.845161	1.52054
Atrx	1.06452	1.45317	1.16196	0.924808	1.19366	1.16382	0.867551	0.868202	1.78568
Lmnb1	1.06313	1.42882	2.47435	0.42052	1.50934	1.21001	1.47338	1.04792	1.08015
Fyn	1.0627	0.796917	0.462917	0.720576	0.925508	1.12622	1.14003	0.928817	0.588102
Snap47	1.06244	2.20721	0.553011	1.85391	1.61801	1.83498	1.29723	2.19972	0.556903
Atp6v1b2	1.06094	1.47166	0.433192	1.3101	1.22138	1.52661	1.08841	1.38951	1.23174
Snx10	1.06082	0.463916	0.204294	1.11574	1.16507	0.923523	0.789473	0.764304	0.721912
Zfp292	1.05685	1.04941	0.477744	0.866024	0.784308	1.06089	0.663865	0.808771	1.02492
Brd4	1.05632	1.16328	1.07983	0.705053	1.1029	0.881007	0.969333	0.839795	1.74279
Nt5c3	1.0553	1.11087	0.40737	1.08079	0.916366	0.901951	0.845683	1.11253	0.598235
Ddx17	1.05523	1.08599	1.08182	1.07037	1.04381	0.927244	1.10118	1.08667	1.14577
Commd1	1.05517	1.13172	1.78311	1.22164	1.13879	1.23687	1.27464	1.25359	1.07908
Amn1	1.05399	1.31182	0.433062	1.21313	1.05145	1.27731	0.974054	1.10098	1.73065
Cdc34	1.0535	0.87927	1.17957	0.92758	1.18294	0.89611	1.03802	0.888569	0.899257
Actr10	1.05344	1.79256	0.825522	1.26093	1.33377	1.53422	1.30965	1.77308	0.977298
Cks1b	1.05317	0.524038	6.37004	0.906238	1.74304	0.949859	1.67693	0.898587	1.02873
Arf3	1.05298	0.682579	0.651347	0.782486	0.821822	0.848472	0.751306	0.913646	0.559342
Kif2a	1.0529	1.02813	0.762148	1.03529	1.02133	0.718039	0.954444	0.940325	1.25706
Fbrsl1	1.05251	0.287364	0.270283	0.555018	0.508694	0.510894	0.729231	0.485947	0.811682
Gna11	1.05163	0.919426	0.837819	0.910664	0.803375	0.751144	0.49868	0.839258	0.645326
Abhd8	1.05085	1.22163	0.691675	1.15434	1.51929	1.18834	1.42517	1.55335	1.03433
Gemin7	1.04994	0.804132	2.02208	1.4528	1.05285	1.08338	1.63464	1.15113	1.10913
Clstn1	1.049	1.26944	0.265842	0.800534	1.20241	0.689526	0.982787	1.06037	0.521703
Tsc22d3	1.04809	1.44105	0.522502	1.74211	1.25702	1.50026	1.49294	1.26447	0.932413
Kdm6b	1.04792	1.10034	0.543176	0.884442	0.815115	0.993646	1.22024	0.589451	1.62232
Prkra	1.04752	1.54206	1.21779	0.983821	1.51881	1.53205	1.11857	1.2274	1.08462
Clptm1l	1.04747	0.697363	0.795565	0.680756	0.80491	0.836284	0.575406	0.702821	0.912783
Idh3a	1.04654	0.723824	0.429175	0.867125	0.631649	0.543759	0.758822	0.620467	0.501483
Rdx	1.04418	1.43525	2.15824	1.12327	1.54098	1.46033	1.29658	1.23038	1.10464
Mrps11	1.04388	0.537775	0.759232	0.574209	0.624336	0.6249	0.687448	0.521509	0.836991
Chic2	1.04373	1.14624	1.11611	1.13857	1.19805	1.07269	1.3846	1.25419	1.67834
Mpzl1	1.04363	0.886695	0.855006	0.645153	0.882497	0.841416	0.971826	0.87494	1.24672
Msmo1	1.04361	0.95326	0.950387	1.08675	1.27521	1.63455	0.927452	1.32066	0.551277
Pnn	1.04292	1.13239	1.08537	0.722186	1.02523	1.18782	0.917036	0.795887	1.44362
Nova2	1.04194	1.21979	0.114865	1.00993	0.98591	0.988853	0.383894	0.520193	1.12495
Bptf	1.04049	0.892148	0.88032	0.676251	1.05962	0.884745	0.780548	0.82256	1.79534
Elovl6	1.0403	0.936614	0.507795	1.09124	0.811327	0.897304	0.938268	0.867427	0.31195
Vps35	1.03969	1.08702	0.622333	0.78725	1.0597	0.9831	1.00399	0.96943	0.681352
Gcsh	1.03852	0.671901	1.5509	1.119	0.882506	0.781146	1.03987	0.890365	0.666176
Bcat1	1.03845	1.33462	0.246958	1.11077	0.72299	1.01939	0.587771	0.576169	0.159359
Mapk6	1.03769	1.07378	0.289045	0.926738	0.857599	0.953773	0.826266	1.13279	1.20095
Idh3g	1.03693	1.2845	0.854429	1.23286	1.27404	1.18608	1.05711	1.23229	1.08422
Znhit1	1.03669	1.08122	1.05374	1.33581	1.02621	0.902764	0.989688	1.14548	1.5104
Foxp1	1.03557	0.41412	2.24774	1.19975	0.579639	0.255969	0.50443	0.44793	1.84041
Srpk2	1.03549	1.21019	0.558252	1.32576	1.07041	1.15755	1.11327	1.21993	1.44085
Mrps26	1.0333	1.0328	1.05509	1.19874	1.08614	1.03173	1.08875	0.943559	1.10016
Phax	1.03055	1.43257	0.944001	0.809802	1.04784	1.3606	1.11423	1.34524	1.06839
Wbp11	1.02938	1.00615	0.999476	0.657491	1.00769	0.724258	0.906304	0.854795	1.5248
Zfhx3	1.02911	2.77171	0.682639	1.66678	0.277139	0.285962	0.52439	0.388014	2.00575
Tomm70a	1.0291	0.888329	0.735871	0.74402	0.791866	0.649662	0.756015	0.664419	1.03573
Ogt	1.02719	1.32101	0.636898	1.14869	1.06292	1.07215	0.823598	1.1435	1.59844
Tnks2	1.02664	1.06492	0.755302	0.641945	0.945766	0.769494	0.674822	0.615049	0.937228
Poldip2	1.02613	1.33353	0.919511	1.13303	0.986823	0.89362	0.986745	0.948471	1.09775
Fam177a	1.02527	0.460825	0.511141	1.01416	1.09224	0.480675	0.881426	1.00297	0.496898
Sec23a	1.02518	1.2047	0.393911	0.752136	1.31529	0.816967	0.848184	0.897543	1.16107
Acat1	1.02393	1.0573	0.797078	1.41292	1.17145	1.24365	1.32837	1.78023	0.414792
Rpl10-ps3	1.02195	0.718677	1.48606	0.944805	1.01023	0.896231	1.04097	0.801088	0.754577
Mrps15	1.02183	0.839654	1.00779	1.48229	1.19697	1.13862	1.04416	1.30264	0.94197
Max	1.02161	0.692219	0.79505	0.89918	0.824334	1.05621	0.983597	0.65452	1.02285
Flot2	1.02086	0.389551	0.507869	0.7402	0.69711	0.614518	1.07923	0.697118	0.937081
Eif2s3x	1.02086	1.06073	0.694458	0.950992	1.01264	0.854796	1.43111	0.876226	0.880871
Diablo	1.02077	1.1294	0.991232	0.821589	1.04905	0.986613	1.2699	1.4282	0.88803
Elp5	1.02042	0.99941	0.783454	1.16921	1.21552	1.05159	0.967054	1.18231	0.96325
Acbd6	1.01893	0.876474	0.750086	1.03127	0.652452	0.637453	0.744149	0.664093	0.843272
Suds3	1.01838	0.953145	0.934743	0.952975	0.967072	0.954485	0.779407	0.893171	1.61935
Faf1	1.01801	0.715635	0.593791	0.609688	0.836556	0.561698	0.502509	0.643886	1.03574
Mvk	1.01773	0.60565	0.949935	1.17746	0.866714	0.635861	0.723853	0.849393	0.27798
Kdm1a	1.01627	0.923358	0.492831	0.587423	0.754607	0.641929	0.953161	0.608113	0.833129
Cd200	1.01617	1.13792	0.097835	1.5355	1.0764	1.64209	0.369622	1.46215	0.493143
Zfp664	1.01564	1.16497	0.587945	0.935939	1.27194	0.985265	1.62328	1.24354	1.44842
Kdm5b	1.01549	1.32021	0.854705	1.07623	1.0127	1.14932	1.23538	1.11745	1.60311
Cacfd1	1.01545	1.44588	0.684525	1.18911	1.12443	1.22906	1.07714	0.952954	1.18267
Tcf12	1.01534	0.710622	2.10608	0.591328	0.853033	0.527419	0.613352	0.726975	3.02774
Immt	1.01452	1.24831	1.02798	0.822754	1.1161	1.01803	1.15543	1.11159	0.657884
Ppm1a	1.01445	0.564416	0.417794	0.618624	0.768657	0.669242	0.597922	0.593727	0.945303
Gprasp1	1.0136	0.547262	0.371346	0.554448	0.986428	0.657105	0.434564	0.614121	1.10552
H2-Ab1	1.01274	0.00448555	0	0.00938836	0.0250826	0.0206907	0.0629448	0.0298006	0
Clpp	1.01271	1.0107	0.899466	0.943806	0.920018	1.21105	0.801191	0.876686	0.917317
Tusc2	1.01214	1.06683	0.749412	1.08009	1.11294	1.01097	1.01397	1.06969	1.30788
Setd5	1.012	0.918079	1.01463	0.749396	0.947137	0.737955	0.926295	0.820742	1.82425
Mrps14	1.01097	0.896131	1.83343	0.954491	1.09716	1.20846	1.04646	0.742114	1.35824
Gtf3a	1.00945	0.601698	0.789384	0.497751	0.612417	0.720162	0.185063	0.529121	0.178592
4930402H24Rik	1.00807	1.02324	0.384987	1.20188	0.819619	0.854432	0.69048	0.723626	0.490315
Elof1	1.00781	1.31837	1.75051	1.41276	1.50902	1.20246	1.41256	1.42305	1.14113
Clptm1	1.00759	1.0969	0.608965	0.675326	1.04373	0.926903	0.748735	0.616419	1.27626
Gm8730	1.00739	0.99964	1.64356	1.07278	0.965873	1.23009	1.04304	0.603996	1.0662
Cdc16	1.00644	1.13913	1.32215	0.738292	1.16301	1.09532	1.10723	1.18294	0.995269
Msi1	1.00583	1.62697	0.335225	1.16693	1.26464	1.03706	1.04429	0.949525	1.81742
Chrna4	1.00487	0.652278	0.0568874	0.817114	0.660367	0.568536	0.551086	0.345794	0.522465
Erdr1	1.00424	0.824221	1.22212	0.80757	1.11347	0.842546	1.0053	0.705215	1.28242
Rsl24d1	1.00409	0.770474	1.04491	0.852435	0.847661	0.935841	0.680629	0.778192	0.734374
Rtn2	1.00382	0.754002	0.0981858	1.00168	0.802104	0.920081	0.767655	1.02784	0.675985
Snx6	1.00132	1.04557	1.44563	1.11074	1.24495	1.66191	1.04434	1.41793	1.49946
H2afx	1.00091	0.966326	4.27251	0.864489	1.5945	1.11604	1.05582	0.956523	1.06516
Senp6	1.00085	0.826274	0.694897	0.63179	0.673903	0.726355	0.944264	0.662362	1.32087
Plk3	1.00066	0.204011	0.0613662	0.416499	0.76082	0.653931	0.236528	0.270199	0.385571
Stip1	1.00021	1.4887	0.968709	0.802358	1.26166	1.21457	1.15965	1.09707	1.519
Rbbp4	0.999645	1.64546	1.53949	0.79972	1.15132	1.55618	1.10881	0.915048	2.46951
Riok3	0.999349	0.850517	0.384846	0.699057	1.03535	0.943396	0.919979	0.875875	1.00588
Ptbp2	0.998071	1.91392	0.406547	1.0692	1.35018	1.39184	1.41202	1.60474	1.08016
Kifap3	0.99779	1.66631	0.930431	1.43926	1.29014	1.13325	1.31229	1.75599	0.918304
Taf10	0.997146	0.827619	1.4341	0.89157	1.01634	0.865974	0.827462	0.877009	1.05707
Bpgm	0.994835	1.28854	0.326726	1.03682	0.989124	0.857681	0.892785	1.05633	1.80931
Smc3	0.993204	1.34987	1.38006	0.879484	1.3471	1.27455	1.1886	1.18355	1.52277
Sltm	0.99175	1.28918	0.862379	0.672701	1.23716	1.05867	1.2582	0.901043	1.26439
Mrpl11	0.991042	1.1064	1.1449	1.40406	1.08217	1.20181	1.15053	1.16044	0.634917
Ppp3r1	0.990973	1.05065	0.366545	0.904469	0.844329	1.08603	0.573997	0.773493	0.849834
Mrpl14	0.990555	0.94775	1.20261	1.16733	1.20018	1.10759	1.12654	1.26443	0.921308
Snca	0.989538	0.124265	0.191913	0.150006	0.59146	0.455603	2.15936	5.63175	0.0385553
Add1	0.988678	0.789048	1.04571	0.911426	1.09969	0.835163	0.834241	0.801795	0.869033
Hacd1	0.988338	0.79405	0.588897	0.802383	0.827757	0.876246	1.18557	0.87397	0.331705
Ddost	0.98747	1.13239	2.18086	0.911819	0.95502	1.20615	0.956471	1.11105	0.780067
Tub	0.98648	0.372584	0.0664794	0.393518	0.398326	0.414361	0.111015	0.253724	1.2438
Usp14	0.986468	0.761622	0.689472	0.849774	0.91312	0.956985	0.81943	1.10036	0.713391
Ccl27a	0.985702	1.27139	0.171179	1.46173	1.18951	1.2903	0.795507	0.989038	0.912034
Rbm5	0.985353	1.2223	0.724048	0.711115	1.09813	1.03671	0.876212	0.988296	1.81918
Atg3	0.985301	0.864702	0.6329	0.773431	0.731646	0.901313	0.853839	0.980343	0.790366
Sar1a	0.984531	0.97611	2.074	0.951507	1.06139	1.17254	0.87742	0.797701	1.28299
Kif3a	0.984036	1.19619	0.452015	1.02936	1.32336	1.04025	0.843869	1.32445	0.83864
Ip6k2	0.983928	1.65825	0.559707	1.04104	1.35053	1.35736	1.03622	1.10864	1.70606
Mpc1	0.983715	0.7957	1.03076	1.8674	0.997719	1.15548	1.00315	2.14609	0.61159
Vezf1	0.983057	1.1828	0.490227	0.682119	0.871124	0.858312	0.684566	0.811832	1.85193
Eif4g3	0.982102	1.07665	0.626596	0.770485	0.899171	0.573599	0.872985	0.651214	1.42965
Eri3	0.981182	0.896486	1.07596	1.01478	1.12928	1.38214	0.664386	1.44367	1.15244
Lsm8	0.980749	1.15984	1.85337	0.75714	1.36469	1.19455	0.98107	0.790957	2.15294
Socs2	0.980713	0.549864	0.172412	0.500372	0.295762	0.439697	0.42191	0.23445	2.46402
Zfr	0.979623	0.987875	0.680366	0.878093	0.935617	0.772171	0.578485	0.797697	1.41048
Zmiz1	0.978973	1.01512	0.526959	1.6057	0.821745	1.12841	0.849172	0.946543	0.963007
Zfand3	0.978031	0.988042	0.841973	0.955813	1.19378	1.11563	1.44686	1.26688	1.64858
Copg1	0.977092	1.00476	0.631222	0.771681	0.879924	0.734746	0.800102	0.839754	0.841885
Idh3b	0.975943	1.21161	0.957075	1.25638	0.908091	1.0755	0.879086	1.22593	1.25472
Gm11808	0.975714	0.941945	1.2495	1.00179	0.854333	0.86813	1.00535	0.771163	0.669418
Atf2	0.97545	1.10899	0.5815	0.930065	1.00921	0.797077	0.738792	0.770229	1.22131
Atp1b3	0.973792	0.938512	1.01344	1.05062	1.00348	0.878261	0.456244	0.671361	0.70186
Timm10b	0.972966	0.887808	1.1436	1.03789	0.866241	1.01525	0.771306	0.850349	0.533096
Suclg1	0.970789	1.37034	1.4191	0.98989	0.994932	1.39913	0.999449	1.07384	1.49215
Chd3	0.970665	1.36505	1.14497	0.965196	1.22936	0.815635	0.90366	0.912541	1.16102
Pitpna	0.970627	1.04954	1.04161	1.07358	0.952447	1.28107	1.04425	0.958326	0.717343
Rbbp7	0.970229	0.890727	1.99532	0.817614	0.750258	1.01201	0.875541	0.746046	0.832768
Ppp2r2a	0.969628	1.11384	0.934447	0.633845	0.991001	0.914332	1.06417	0.94929	1.01165
Nav2	0.969625	0.437578	0.132203	0.128784	0.327791	0.0958933	1.2632	0.0857895	0.190158
Ypel3	0.969608	2.09698	0.477135	1.42403	1.27949	1.23678	1.33255	1.11062	1.66478
Commd8	0.969538	1.00809	0.826194	0.919609	0.915697	1.07241	1.01655	1.0401	0.658582
Tspyl1	0.96909	1.20671	0.53033	0.838141	1.07063	0.900264	0.801378	0.835758	0.640747
Nr0b1	0.968748	0.0166495	0.00429506	0.0144004	0.00539965	0.0193865	0.0245885	0.00960216	0.163187
Cask	0.968194	0.958197	0.626511	0.48443	0.854369	0.862328	0.660728	0.918509	0.363604
Cops3	0.967788	1.38132	0.984081	1.15563	1.36246	1.48297	1.26485	1.79677	0.984364
Ilkap	0.967769	0.863064	1.3657	0.669254	1.00704	0.950769	1.11152	0.828548	1.18833
0610010F05Rik	0.967719	1.04254	0.258489	0.820546	0.888461	0.788328	0.766866	0.844198	0.928898
Cbarp	0.967624	0.937338	0.10878	0.932984	0.908531	1.10264	0.395732	0.520338	1.22006
Bscl2	0.9652	0.828686	0.373697	0.956533	0.971656	0.998735	1.0458	0.900875	0.583145
Sf1	0.965088	0.892928	0.909926	0.637716	0.894433	0.926453	0.927167	0.685129	1.04016
Dhx30	0.964894	0.9166	0.555085	0.66209	0.820873	0.711581	0.595365	0.541444	1.07993
Mrpl55	0.964321	0.706506	0.875592	0.93	0.97186	0.76374	0.867364	0.656524	0.778483
Smarca2	0.964319	0.671211	0.822406	0.849245	0.483549	0.648909	0.129429	0.263944	0.697386
Atp2a2	0.963993	0.74904	0.529453	0.694204	0.707754	0.554942	0.763223	0.51831	0.523281
Otub1	0.963845	0.940411	1.00273	1.16531	1.12156	1.14195	1.25776	1.32807	0.80568
Ppp2r5b	0.9629	0.646254	0.214052	0.919678	1.02698	0.590483	0.984506	0.833602	0.708192
Stk25	0.962892	1.20425	0.834583	1.29816	1.02224	1.10249	1.3138	1.21433	0.747259
Runx1t1	0.961178	3.29459	0.60912	1.30023	1.30472	2.93787	2.44312	1.26362	0.164627
Pja2	0.95973	1.17791	0.516528	0.925673	1.07395	0.937688	0.846699	0.981345	1.17599
Leprotl1	0.959433	1.00832	0.65836	0.947468	0.785316	0.758502	0.803467	0.795727	1.02094
Rbm18	0.959119	1.22745	0.491761	1.03541	1.03475	1.18346	1.00971	1.1246	1.46866
Ncbp2	0.958977	0.936032	1.19635	0.93718	1.1074	0.908244	1.12537	1.08274	1.07507
Hmgn2	0.958515	2.14207	10.4422	1.22716	3.9812	1.59237	1.90346	1.29171	1.91343
Tmem65	0.9578	0.638237	0.419715	1.00396	0.79698	0.606541	0.808203	0.61971	0.575287
Klhdc3	0.957746	1.06838	0.649434	0.880608	0.880439	0.953539	0.893044	1.00247	1.25839
Rnf41	0.957463	0.637309	0.329007	0.639854	0.70618	0.589649	0.578545	0.799809	0.949309
Ing1	0.957254	0.934154	1.00708	0.677275	0.892732	0.657117	0.99589	0.695018	1.24939
Ggnbp2	0.956134	1.07162	0.781919	0.762965	0.921866	0.95647	0.945804	1.01815	0.522769
Elavl2	0.955986	2.93025	0.16685	2.64986	2.16058	3.34005	2.81293	2.70573	1.63802
Ppp2r4	0.955881	0.609791	0.773291	0.784299	1.01824	0.738447	1.04605	0.862569	0.507193
Kif5a	0.95572	0.696744	0.0670428	1.3305	0.946847	0.829229	1.18769	1.04047	0.95538
Cxxc4	0.955698	0.57765	0.149881	0.634963	0.554771	0.344854	0.149747	0.190058	1.14978
Nap1l5	0.955419	0.890423	0.0483373	1.0543	1.44537	1.13329	0.154908	0.965849	2.76902
Psmd3	0.954361	0.939559	1.16013	0.767527	1.0983	1.01742	0.96816	1.09955	1.34534
Mrpl15	0.95434	0.820923	0.97391	0.939452	0.901527	0.894098	0.978527	0.968891	1.06407
Pdrg1	0.953793	0.966372	0.742142	1.09229	1.11953	1.20048	1.25154	1.23352	0.998209
Grpel1	0.953372	0.881608	1.14398	0.858272	0.768127	1.02317	1.02777	0.954749	0.747461
Sri	0.952896	0.510016	2.23421	1.20647	1.10623	0.841657	1.23743	1.04055	0.609571
Fbxo21	0.952739	0.80961	0.260501	0.652927	0.65261	0.657086	0.61716	0.760565	0.871917
Rnf4	0.95268	0.63805	0.644279	0.854559	0.612381	0.901915	0.608747	0.74303	1.28175
Mtfr1l	0.951267	0.980338	0.996238	0.903412	0.919375	0.821297	0.921832	0.707778	0.505191
Rtcb	0.950944	1.25954	0.975265	1.17936	1.11801	1.31981	1.16278	1.14901	1.14401
Pum1	0.950603	1.0374	0.784359	0.533136	0.890943	0.92	0.571498	0.55761	1.24221
Alg2	0.949625	1.59966	0.30528	1.47105	1.07588	1.43425	0.931658	1.45981	1.09528
Dut	0.948903	0.795012	1.98913	1.02888	1.25443	0.954925	1.19176	0.808415	0.651336
Tfg	0.948801	1.15978	1.13469	0.917056	1.00557	1.08735	0.95408	1.30501	1.35038
Coro1a	0.948748	0.638625	0.0823054	1.23929	0.975274	2.29015	1.03743	1.25591	0.377725
Slc38a1	0.948674	1.46517	0.431539	0.938529	0.938506	1.0257	1.28278	1.20868	1.13996
Ccdc50	0.947776	0.965081	0.615437	1.10107	0.830799	0.878838	1.03892	1.13121	0.986866
Ccdc28b	0.94775	1.01481	0.726819	1.3653	1.10172	0.945828	0.82257	1.34602	0.856091
Bin1	0.947317	1.03371	0.989604	0.831366	1.09911	1.1463	1.14032	0.976951	0.573105
Arf6	0.945576	0.42717	1.22623	0.554365	0.705385	0.695992	0.729486	0.518331	0.40012
Atp6v1h	0.944939	1.16515	0.355237	0.904709	0.932084	1.07453	0.937151	1.21817	0.822238
Ube4b	0.944611	0.93638	0.398014	0.713527	0.821425	0.63064	0.669996	0.761761	0.530176
Parl	0.944449	0.856686	0.527007	0.78052	0.746221	0.848176	0.826269	0.970213	0.904025
Cnr1	0.944147	0.410042	0.0710605	0.224799	0.725571	2.04308	0.247477	2.47457	0.412508
Atp2b1	0.944052	2.39589	0.841006	2.33254	1.64266	1.45307	1.33487	2.14418	0.914677
Macf1	0.942923	1.07639	0.953452	0.863464	0.728008	0.787995	0.754167	0.785182	1.24175
Baz2b	0.942662	0.810106	0.392332	0.655719	0.755125	0.731284	0.803787	0.868251	1.51442
Rcor2	0.941873	0.702133	0.284238	0.332611	0.803191	0.521727	1.49712	0.413159	2.3528
Vps36	0.939665	0.869055	0.812111	1.00285	0.776513	0.911018	0.748679	0.728034	0.424148
Tmem208	0.938577	1.09193	0.994176	1.60217	0.990257	1.29631	1.49549	1.16324	0.911517
Clip3	0.938081	1.18773	0.626111	1.15334	1.22494	0.906114	1.6957	1.0337	1.6243
Prrc2a	0.937831	0.85368	0.932536	0.826845	0.786591	0.830839	0.909764	0.74381	1.25584
Ppm1b	0.937826	1.02463	0.494025	0.722006	0.816372	0.769202	1.07623	0.87544	1.85025
Mrpl41	0.93749	1.28907	1.01756	1.35304	1.04946	1.26724	1.08559	1.17639	0.921987
Ralgds	0.937423	1.18936	0.290109	1.19365	1.12646	0.966362	2.20397	1.66052	1.25029
Arhgap33	0.937205	0.992698	0.124806	0.826212	0.87054	0.762522	0.556936	0.771004	0.475605
Abcf1	0.936691	0.907121	0.711755	0.70855	0.796023	0.722332	1.02184	0.840064	0.935966
Dpm2	0.936525	0.969015	0.838221	1.13313	0.839534	0.878869	0.991506	0.993206	0.656617
Maf1	0.936433	1.22135	0.755019	0.963051	0.976689	0.9377	1.02342	0.856482	1.49915
Cdk2ap1	0.9361	0.720986	1.63776	0.71671	1.16937	0.725773	1.17922	0.598917	1.42311
Faap20	0.933813	0.916119	0.76149	0.927164	0.780274	0.831069	0.795191	0.56039	1.18775
Sugt1	0.933388	1.10625	1.3292	1.05034	1.13604	1.06214	1.09943	1.46525	0.792814
Ipo5	0.932174	0.413771	0.601228	0.30442	0.522432	0.578081	0.345536	0.305623	0.319112
Sin3b	0.931676	1.28207	1.41363	1.05371	1.20754	1.59826	1.045	1.33418	0.786897
Ptpra	0.931643	0.696631	0.688959	0.590064	0.829744	0.57412	0.593579	0.719357	1.09284
Nans	0.931504	0.554504	1.32973	0.804478	0.98518	0.84699	0.900238	0.918669	0.495674
Ankrd13a	0.931466	0.500782	0.353886	0.550939	0.744668	0.596187	0.891498	0.496482	0.85968
Scg5	0.931252	1.27754	0.0533781	0.972822	0.876645	1.22078	0.801445	1.14148	1.35176
Mrpl13	0.930788	0.615581	0.895465	0.719395	0.609656	0.633543	0.567315	0.696423	0.835596
Ttll1	0.930747	1.09449	0.232527	0.893396	1.06325	0.919288	0.896954	1.08455	1.13018
Huwe1	0.929794	0.897556	0.604397	0.879689	0.823168	0.746987	0.874871	0.896234	1.15178
Mrpl24	0.929753	1.12524	0.98089	0.86885	0.872425	0.966026	0.94933	0.63662	0.677554
Fdx1l	0.929278	0.585182	0.929853	0.776222	0.750908	0.639347	0.827228	0.841787	0.351339
Pigx	0.929118	1.1171	1.1746	0.974606	1.05329	1.36163	0.677852	0.920789	1.0739
Yrdc	0.928109	0.617426	0.391722	0.657633	0.653146	0.777903	0.795161	0.725956	0.911924
Tmed10	0.927841	1.43203	3.0017	1.81551	1.35275	1.46704	1.55359	1.541	0.704485
Polb	0.927239	1.28154	0.320325	0.892906	0.940805	1.04851	1.14407	1.13071	1.05707
Lcmt1	0.927235	1.1364	0.529573	1.05112	0.861236	0.842706	0.780712	0.960628	1.00144
Ccm2	0.927015	0.612031	0.883854	0.75412	0.709416	0.543614	0.795968	0.723277	1.00558
Paics	0.925467	0.682775	1.37853	0.785984	1.08799	0.966851	1.086	0.82065	1.13551
Vps4a	0.924938	0.967778	0.609668	0.838783	0.96464	1.06175	1.06522	1.05012	1.09687
Gps1	0.924846	1.32603	1.11781	1.00117	0.983939	1.50699	0.890822	1.26203	0.639333
Limk2	0.924758	0.877336	0.324556	0.90395	0.844721	0.806582	0.866838	1.02246	1.03674
Syt13	0.924399	0.928163	0.135439	0.702293	1.14033	0.430126	1.88569	1.88042	0
Nudt3	0.924001	0.846787	0.452797	0.871157	0.734661	0.665483	0.52635	0.904566	0.649234
Mrps12	0.922857	0.932654	1.25987	1.09651	0.995799	1.13733	0.747136	0.718291	0.942992
Phb	0.922825	0.663351	1.16865	0.832582	0.657607	0.76639	0.822953	0.937842	0.34018
Kif21a	0.921647	1.11035	0.0822237	1.34562	1.64862	0.776867	0.707614	1.33926	0.722147
Atp6v0e2	0.921123	1.0637	0.133406	1.3212	1.14101	0.899403	1.12988	0.898926	0.695959
Pde6d	0.920924	0.905911	1.04557	1.08606	1.01074	0.72701	0.903473	0.885895	1.65725
Dctn6	0.920735	0.989634	0.468563	1.05317	0.845225	0.898734	0.883439	0.936126	0.748374
Hsdl1	0.919912	0.686907	0.25166	0.76571	0.888093	0.761074	0.545789	0.677994	0.453969
Pqbp1	0.918961	0.871507	0.603096	0.78424	0.807098	0.795456	0.703501	0.966058	0.730794
Mpdu1	0.918571	0.821455	0.62366	0.793914	0.77833	0.929378	0.575453	0.586263	0.992352
Nol7	0.917943	1.03285	1.25928	0.889815	0.899099	1.02348	1.04161	0.852794	1.06468
Gtpbp4	0.917798	0.79298	0.511593	0.629012	0.615784	0.979904	0.760616	0.665106	0.574323
U2af2	0.915591	1.19979	1.11505	0.769628	1.10132	1.24739	1.07841	0.982603	1.07543
Spast	0.915205	0.893667	0.385387	0.905165	0.902153	0.813777	0.757317	0.833583	0.972953
Becn1	0.914775	0.800201	0.53028	0.897329	0.860273	0.608563	0.786469	0.799219	0.775092
Dynlt1f	0.913897	1.05497	1.47194	1.15697	1.30506	1.19545	1.25436	1.47218	0.347598
Abhd17c	0.913842	0.634556	0.474566	0.630817	0.69295	0.763319	0.869127	0.602217	0.759484
Bod1	0.91364	1.14912	0.793778	0.835279	0.926791	0.851633	0.871382	0.785274	1.09604
Dhx15	0.913307	0.781685	0.847691	0.542697	0.904182	0.462679	0.645477	0.764636	0.986492
Capza1	0.913043	1.03154	1.08003	1.01024	1.18905	1.08232	0.923323	0.860399	0.973057
Sys1	0.912976	1.17584	1.44007	1.08319	1.03237	1.2645	0.726389	0.855139	0.598117
Rrp7a	0.912662	0.779375	0.561309	0.729802	0.756769	0.656919	0.430404	0.580911	0.692216
Asna1	0.91264	0.898409	0.897579	1.00778	0.964235	0.965556	1.01833	0.977851	0.595559
Knop1	0.912474	1.05135	0.877973	0.854426	1.00684	1.10475	0.895381	0.803586	1.35306
Med22	0.91207	1.37235	0.360233	0.983126	1.1227	1.26219	1.02758	1.03117	1.56106
Dst	0.911948	0.71455	0.471268	1.31485	0.807401	0.681801	2.03754	0.987509	0.693088
Mesdc1	0.91193	0.541722	1.09897	0.660484	0.84625	0.684525	0.788658	0.681545	0.298856
Use1	0.911576	1.0725	0.956041	1.00842	0.910294	1.14317	0.789231	0.793475	1.84087
Ndufs8	0.910767	1.3943	1.72191	1.63827	1.25349	1.33682	1.18301	1.15312	0.625359
Smarcc2	0.910375	1.15052	0.366552	0.839998	0.758572	0.785319	0.717629	0.841459	0.978101
Lpar1	0.910016	0.0466139	1.50857	0.0113199	0.0765594	0.0351379	0.113577	0.0156558	0.286292
Sept2	0.909647	0.673688	2.3366	0.540106	0.804884	1.01755	0.690901	0.440238	1.30367
Crk	0.908848	0.689183	0.775629	0.637179	0.918769	0.740537	0.915488	0.603243	0.899547
Hap1	0.908723	0.221137	0.033855	0.0822451	0.192552	0.150031	0.10025	0.0965001	2.35182
Ccnl2	0.908264	1.06347	0.806786	0.774047	0.728666	0.986223	0.942561	0.778281	1.25328
Flywch1	0.907661	1.10097	0.301056	0.478563	0.87734	0.704746	0.525651	0.73297	1.181
Rnf138	0.90657	1.06698	0.354992	0.674403	0.736905	0.756356	0.417841	0.670802	0.882701
Mrps5	0.906099	0.866179	0.732064	0.630042	0.76207	0.675428	0.903469	0.746389	0.914244
Dph3	0.905898	0.691346	1.02977	0.777496	0.810973	0.719719	0.809961	0.655705	1.01324
Mfap2	0.90444	0.550898	9.1287	0.869591	0.952738	0.749525	1.46239	0.581589	2.95034
Tmem9b	0.903779	0.781209	0.493321	1.01677	0.738293	0.802968	0.921673	0.780077	0.856681
Eprs	0.903608	0.769143	0.71178	0.538665	0.727499	0.6561	0.708811	0.53414	0.418896
Msl1	0.902519	0.79308	0.781118	0.89521	0.935557	0.738345	0.833813	0.753117	1.06812
Sar1b	0.900153	1.34138	0.705401	1.6608	1.09764	1.42176	1.09991	1.58451	0.6773
Aida	0.899973	0.493591	1.15722	0.811939	1.0858	0.583429	0.751203	1.03293	0.219111
Peli1	0.899836	1.7782	0.847203	1.12969	1.10932	1.11107	1.19191	1.2659	2.01781
Ap1ar	0.899203	0.816544	0.473378	0.99553	1.10692	0.886189	1.09607	1.07809	0.625647
Mest	0.899059	3.78101	25.2953	0.727104	3.10651	0.983695	1.20425	1.69159	5.43784
Fem1b	0.898481	0.60696	0.358818	0.91351	0.932096	0.540637	0.401738	0.660638	0.833434
Selt	0.898126	0.915692	0.742149	1.19394	1.00202	0.803488	0.992119	0.987512	0.890744
Zswim6	0.897925	0.710036	0.15284	0.600129	0.498316	0.548199	0.333252	0.343751	0.998007
Pdcd6	0.897872	0.972384	1.32467	0.985083	0.937156	0.814739	0.472516	0.738717	1.50382
Nudcd3	0.897547	0.905366	0.760608	0.973253	0.694442	0.890942	0.584416	0.838075	0.981965
Deaf1	0.897225	1.05344	0.50619	1.12706	0.870747	0.941081	0.602091	0.898035	1.02233
Ilf3	0.896886	1.22435	0.607882	0.644472	0.80506	0.686765	0.807257	0.765743	1.07569
Patz1	0.89658	1.21503	0.336294	0.982594	1.08188	0.9454	1.32497	0.973226	0.995673
Serpinh1	0.896352	0.468091	19.4216	0.624282	1.39101	0.637975	1.30385	0.322817	1.30496
Manbal	0.896322	0.727848	0.933064	0.771527	0.702344	0.643479	0.821968	0.795347	0.990191
Mapk11	0.895581	0.44218	0.0874954	0.408773	0.588617	0.539737	0.422143	0.456019	0.808144
Raf1	0.894971	1.49622	0.859551	0.860296	1.07248	1.01857	1.01289	1.08344	1.23224
Ahi1	0.894914	0.394994	0.208291	0.694211	0.477403	0.400343	0.214285	0.195729	0.808024
Cd47	0.894844	0.960693	0.373156	1.7445	0.968031	1.69205	1.08588	1.3286	0.309678
Gpm6a	0.89474	2.11036	0.185792	1.75702	2.20812	2.07095	0.149222	3.91868	0.261875
Lcorl	0.894604	0.414837	0.164971	0.205864	0.363034	0.414982	0.278142	0.238381	0.703815
Wdr26	0.894105	0.960541	0.615229	0.80692	0.805824	0.885266	0.829002	0.69813	0.666316
Eci2	0.894057	0.601619	1.61586	0.747677	0.869998	0.681168	1.2783	0.950252	1.53845
Fopnl	0.893626	1.01298	0.767246	0.997625	1.0518	0.853105	1.0922	1.13823	1.29237
Kctd10	0.893482	0.733258	0.694717	0.759226	0.734968	0.888084	0.846021	0.904091	0.857678
1810037I17Rik	0.893384	0.763819	1.27597	0.98805	1.0312	0.870961	1.4413	0.786958	0.812752
Dazap2	0.892405	0.907372	0.662365	0.445379	0.908194	0.93642	0.564858	0.412045	1.71034
Rabl6	0.892222	0.64951	0.633129	0.582014	0.765031	0.585889	0.831338	0.465118	0.856006
Glrx2	0.891312	0.888364	0.628573	0.957325	0.849314	0.811876	0.900345	0.934092	0.580756
Ankrd12	0.891048	1.35491	0.435837	0.955264	1.08239	0.972694	0.68539	1.15847	0.60371
Tmem126a	0.890929	0.816082	0.99528	1.03509	0.89231	0.735522	0.666395	0.816097	0.706933
Actl6a	0.890481	1.17164	1.23461	0.515952	0.863924	1.16331	1.01812	0.780339	1.58496
Gdpd1	0.890376	1.91504	0.166353	1.3857	1.16153	1.38826	1.42822	1.47986	1.48533
Sgk1	0.890064	0.394373	0.126455	0.940607	0.116285	0.11792	0.0945184	0.173275	0.355375
Dnlz	0.889218	0.743181	1.03303	1.11163	0.879091	0.785555	1.03273	0.718822	0.400266
Emg1	0.889015	0.813449	1.96405	0.898097	0.818756	1.13371	1.11755	0.872022	1.50758
Ccar1	0.888868	1.0514	0.92076	0.491321	0.988738	0.852687	0.989494	0.671968	0.849072
Psme3	0.88805	0.625687	0.864038	0.838154	0.76276	0.748934	0.979651	0.809444	0.399377
BC004004	0.888044	0.896434	0.560185	0.846865	0.928897	0.877947	0.753327	0.790727	0.292305
Agpat4	0.887439	0.631544	0.508472	0.743812	0.837503	0.691003	0.815555	0.732298	1.38948
Wsb2	0.886628	0.743636	0.383327	0.78493	0.863459	0.574876	0.808244	0.991713	0.791341
Ehmt1	0.886581	0.901126	0.664303	0.58856	0.848971	0.707628	0.741997	0.667481	1.4205
Ccz1	0.88649	0.942974	0.634989	0.74075	0.991137	0.754567	0.790765	0.723206	1.27122
Pabpn1	0.884429	1.02719	0.474698	1.0449	0.767455	0.888794	0.691039	1.01719	0.861166
Chchd4	0.884414	0.529906	0.445701	0.661181	0.562058	0.780317	0.315859	0.39789	0.196893
Mmd2	0.884017	0.0451898	0.0779765	0.113353	1.81695	0.78351	0.551106	1.59334	0.1417
Rtca	0.883908	0.999936	0.608909	0.765033	0.993021	0.989873	0.949372	1.11184	1.15721
Cul1	0.883815	0.797103	0.946045	0.555557	1.04237	0.669705	0.968169	0.706136	1.4965
Fam171a2	0.883477	1.13667	0.308521	0.904786	1.05677	0.95268	0.739879	0.903676	0.53756
Nudt4	0.883246	0.813415	2.09595	0.863442	1.36676	0.785055	1.22672	1.15242	0.983476
Immp1l	0.883064	0.720529	1.57281	0.951028	0.965691	0.716181	1.17971	0.873034	0.697209
Gpbp1	0.882696	1.02783	0.965724	0.599466	0.899654	0.816663	0.766989	0.94398	1.6545
Tspan6	0.882161	1.39351	1.40165	1.21059	0.988695	1.25337	0.867089	1.25802	0.97162
Pnrc1	0.88164	1.04038	0.876156	0.473604	1.01014	0.848812	1.19862	0.879342	3.19181
Ppp3cb	0.88151	0.857924	0.709779	0.678255	0.832263	0.84549	0.626564	0.720234	0.718339
Nsun2	0.881455	0.454033	0.506595	0.34045	0.484594	0.476332	0.520533	0.38405	0.231936
Ap2a1	0.881378	0.762094	0.43284	0.328568	0.698969	0.485339	0.754985	0.609048	0.730072
Ttc9b	0.881222	1.0432	0.0536012	1.74316	1.61303	0.891217	1.08371	1.49499	0.897826
Clcn4	0.881204	1.21382	0.407982	0.734603	0.925706	0.824065	1.01005	0.678416	0.817237
Snhg6	0.88116	0.555484	0.809823	0.691304	0.451841	0.646477	0.721223	0.348837	0.590424
Ubn2	0.880569	1.34278	0.44613	0.96096	0.904073	1.04268	0.76851	0.822926	1.89374
B630019K06Rik	0.88054	0.573872	0.0842086	0.422527	0.49791	0.654737	0.191606	0.404393	1.07847
Rbm42	0.880416	1.18252	0.809515	0.601563	0.923366	0.980413	0.896471	0.928451	1.24775
Uba2	0.880015	1.57008	0.815137	0.753554	1.11845	1.19089	1.09065	0.992474	0.988904
Mrpl21	0.879098	0.906951	1.27768	0.96284	0.679423	0.825547	0.753658	0.803537	0.814803
Pak2	0.878984	0.683832	0.573705	0.542521	0.824781	0.713233	0.535716	0.584082	0.928207
Nkiras2	0.878525	1.06412	0.728344	0.900453	1.0091	0.853911	0.909113	0.798122	0.846161
Serp1	0.877406	0.689696	2.63028	0.70464	0.992694	1.27013	0.992831	0.707571	0.711985
Ubqln1	0.876886	0.800434	0.691652	0.848635	0.848734	0.838881	0.931161	0.842544	0.93676
Ralb	0.875846	0.314304	1.08463	0.679448	0.404128	0.385328	0.823418	0.500076	0.599992
Ap2a2	0.875602	0.801894	0.816851	0.85053	1.19861	1.10347	1.27692	1.06079	0.398656
Scamp3	0.875601	0.89976	0.634583	0.819207	0.806752	0.688026	0.582757	0.648361	0.602744
Bloc1s6	0.875189	0.746071	0.330708	0.752668	0.7339	0.840215	0.457694	0.753375	0.85518
Kcnc1	0.874977	0.214026	0.0290286	0.156158	0.179168	0.185126	0.261136	0.0525772	0.262946
Zranb2	0.87439	1.19279	0.846818	0.856478	1.16697	1.20671	1.0147	0.835199	1.19974
Sdf4	0.874156	1.03783	1.32416	0.900408	0.88688	0.962169	0.951585	0.952973	1.01735
Cuta	0.874004	1.16947	1.57319	1.08667	1.1863	1.04674	1.10331	0.86713	1.31768
Rbck1	0.873718	0.655797	0.475607	0.496288	0.561921	0.619851	0.511458	0.506952	0.58622
Rap1a	0.873631	0.707213	1.74446	0.701193	0.921012	1.13705	0.868161	0.850261	0.972512
Zmynd11	0.873038	0.660505	0.608484	0.710315	0.820735	0.744056	0.605654	0.619391	1.00481
Tmem57	0.872866	1.42641	0.544097	0.859029	1.13885	1.02508	1.00343	1.03625	1.42483
Tardbp	0.872582	0.830342	1.13508	0.806255	0.980255	0.880621	1.08426	0.820733	1.00125
Pdcl3	0.872386	0.956911	0.93873	1.25951	1.0918	1.30651	1.23764	1.34585	0.480924
Mrpl40	0.872353	0.669643	0.734924	0.861683	0.805572	0.612282	0.756626	0.79625	0.852895
Nr2f2	0.872326	1.05355	2.03542	2.94387	0.813839	0.553421	0.710079	0.0818718	0.201562
Cd63	0.871984	0.924471	6.77668	1.27853	1.36711	2.03087	1.68411	1.17957	0.676432
Tmx1	0.871614	1.16777	0.755542	1.21229	1.18179	1.31575	0.729902	1.12445	1.095
Usp34	0.870635	0.804337	0.68925	0.783484	0.908798	0.799735	0.704429	0.66703	1.01499
Fasn	0.870371	0.613042	0.35776	0.856082	0.965183	0.51575	0.719824	0.849134	0.523104
Tmcc1	0.869914	1.13671	0.412951	0.986153	0.94617	0.908199	0.79279	0.94394	1.53668
Itfg1	0.868612	0.915963	0.412609	0.695963	0.707147	0.776035	0.52036	0.695611	0.640427
Bmyc	0.867574	0.806992	1.14626	1.03889	0.999182	1.0622	0.720948	0.950989	0.381313
Slc22a17	0.867438	1.22868	0.380357	0.836685	1.12841	0.674262	0.826817	1.06155	0.977811
Slc29a4	0.867071	0.698626	0.0937086	0.732845	0.569788	0.608854	0.447805	0.713876	0.683855
Ebna1bp2	0.866452	0.553224	0.897621	0.543117	0.759717	0.694385	0.759046	0.683524	1.05525
Dnpep	0.866289	1.35809	1.01868	1.21185	1.36978	1.23109	1.45963	2.09241	0.871274
Ccdc115	0.865366	0.908249	0.481765	1.02278	0.81346	0.979405	0.697719	0.750533	0.740073
Crabp1	0.864985	8.29374	3.79614	3.06828	34.2155	23.7474	1.70352	193.763	0.587724
Rnf220	0.864151	0.346384	0.563078	0.959779	0.665204	1.79643	0.535302	0.806686	1.05179
Sec14l1	0.863839	0.722659	0.513871	0.599425	0.965294	0.589974	0.897741	0.692106	1.02884
Tnfaip1	0.863495	0.463836	1.39177	0.636275	0.701146	0.574028	0.880397	0.532461	0.979011
Lzts1	0.861615	0.607395	0.0450857	0.352063	0.363668	0.269815	0.250682	0.310712	0.461506
Vimp	0.86159	0.692139	1.21629	0.646477	0.581692	0.80579	0.676534	0.520596	0.438375
Tmem132a	0.8608	1.17084	0.364404	0.454325	0.859313	0.608911	1.4409	0.931528	1.27111
Whsc1	0.859039	0.93362	0.748223	0.80519	1.03666	0.812037	0.893435	0.864007	0.826659
Eif1ad	0.858929	1.33607	0.834733	0.929357	1.02643	0.882569	1.14869	0.892092	1.01544
Gpsm1	0.857963	0.982803	0.292052	0.48464	0.853367	0.694771	0.715928	0.566832	0.699724
Pten	0.857499	0.631072	0.58853	0.642069	0.552305	0.453542	0.66877	0.642192	0.5817
Fads1	0.857463	0.990465	0.585354	0.847369	0.983017	0.898168	0.601841	0.834514	0.531909
Dctn5	0.856215	0.756324	0.600834	0.895034	0.848398	0.905187	0.6857	0.778724	0.886859
Csnk1g3	0.855903	0.770684	0.614055	0.74629	0.673736	0.642361	1.18126	0.664802	1.04944
Thoc3	0.855893	0.938356	0.948316	0.851295	0.931948	0.953452	0.821577	0.884421	0.986374
Fam162a	0.855837	0.503431	1.40028	0.650052	0.717745	0.813521	0.566048	0.438439	0.401512
Mapk8ip2	0.855624	1.1371	0.0846895	0.892557	0.909513	0.737471	0.821137	0.85955	0.815162
Psmd12	0.855606	1.26169	0.729855	0.914888	1.03062	1.31014	0.903661	1.15693	0.858945
Pin4	0.855476	1.33222	0.869466	1.08949	0.969014	1.1053	1.14767	1.19375	1.27672
Sobp	0.855216	1.06065	0.300619	0.562809	0.406697	0.562737	0.474309	0.598458	0.911399
Camk2n1	0.854679	1.9279	0.22927	1.56042	1.7007	1.60872	0.569251	1.54606	4.09989
Ppil1	0.8543	0.92284	0.655145	0.815276	0.857989	0.834835	0.547755	0.56308	0.25135
Snx17	0.854293	0.968571	1.02438	0.697533	0.811866	1.1171	0.429224	0.617532	0.840566
Id2	0.854055	2.67626	0.457589	4.35214	0.606789	0.152714	2.15616	0.472347	3.4203
Lsm7	0.853662	0.673258	1.00743	0.63976	0.663503	0.79631	0.676582	0.65054	0.686471
Usf2	0.853593	0.947054	0.795701	0.900363	0.880811	0.819053	1.13606	0.764773	0.639648
Med8	0.853589	1.00231	0.907621	0.892716	0.923948	1.23116	0.86085	0.80418	1.04234
Vezt	0.853325	0.83081	0.476724	0.778708	0.913613	0.698797	0.691381	0.688052	0.67096
1700123O20Rik	0.853224	0.759539	1.03477	0.879713	0.71855	0.888876	0.986381	0.764993	1.22886
Vangl2	0.853018	1.45665	0.409464	0.843079	0.889102	1.20234	0.455891	0.63283	1.47931
Ddx54	0.852817	0.654996	0.44698	0.40886	0.553156	0.626765	0.785454	0.475775	0.735535
Sox12	0.85277	0.920088	0.307674	0.697004	0.904581	0.766799	0.548966	0.815077	0.581342
Kif1a	0.852702	0.857882	0.128072	1.09179	0.906838	0.630357	0.734622	1.00563	0.635821
Atcay	0.852248	0.805042	0.0421508	0.752687	0.515124	0.692578	0.542852	0.678244	0.861058
Trappc3	0.851921	1.20851	0.777787	1.19595	1.18515	1.24455	1.26082	1.49934	0.73591
Igf2bp1	0.85187	0.49718	1.15229	0.588149	0.816578	0.628456	1.47037	0.612969	0.962199
Tmed7	0.851468	1.01626	1.09554	0.748591	0.80087	0.981015	0.746791	0.641794	1.35525
Gmcl1	0.85137	0.646304	0.527864	0.647346	0.795904	0.615675	1.17931	0.828214	0.697968
Smim4	0.850957	0.527364	0.20095	0.547428	0.542529	0.701577	0.418659	0.553873	0.515399
Lrrc58	0.850614	0.497553	0.635408	1.26958	0.816032	0.657946	0.914533	0.959985	0.694795
Ktn1	0.849855	0.937992	0.534704	0.677849	0.804732	0.802838	0.789338	0.795214	1.10564
Rps19bp1	0.84977	0.84719	0.870311	0.8497	0.817193	0.869204	0.624563	0.904074	0.686311
Sept9	0.84914	0.791539	1.65743	0.598965	0.763403	0.875989	1.00517	0.680651	0.901875
Tmem60	0.849118	0.748426	0.603094	0.827979	0.760348	0.7032	0.874093	0.644878	1.05156
Ndufv1	0.848951	1.41768	1.17756	1.10511	1.1641	1.08623	1.01434	1.35105	1.13867
Ppp2r2d	0.848944	0.713494	0.74722	0.824118	0.863389	0.65947	0.867102	0.94315	0.748057
Sod1	0.848879	0.607719	0.787964	0.594624	0.576399	0.728149	0.708961	0.757607	0.81023
Csrnp3	0.848818	0.725091	0.122158	0.537922	0.473958	0.619394	0.230727	0.352679	0.517082
Kcnk12	0.848816	0.0159784	0.0159394	0.00629659	0.0249475	0.0245462	0.0165464	0.021731	0
Larp4b	0.848753	0.509545	0.519195	0.644058	0.780383	0.646859	0.651242	0.555752	0.820162
Cnot6	0.847427	0.96144	0.909981	0.733162	0.781239	0.700242	0.704794	0.668398	0.808973
Ap4s1	0.846604	0.775934	0.430382	0.816455	0.765649	0.713946	0.73033	0.772304	0.424084
Ric8	0.845948	0.572071	0.328953	0.879994	0.831899	0.61564	1.11463	0.867012	0.947607
Ifrd1	0.844906	0.589712	0.57018	0.362972	0.699734	0.994199	0.544469	0.587826	0.716954
Cdc42ep3	0.844287	0.601344	0.187377	0.391112	0.400172	0.557733	0.522011	0.472114	1.15752
B3gat3	0.843663	0.761238	0.395658	0.788042	0.671039	0.532961	0.823791	0.661691	0.623583
Exoc5	0.84194	0.858715	0.54271	0.651871	0.822746	0.728296	0.837296	0.801715	1.10815
Mrpl36	0.841773	0.743992	1.19533	0.837028	0.85174	0.783696	0.930582	0.560866	0.572306
Fkbp2	0.841641	0.741336	1.19813	1.06969	0.867322	0.835601	0.874429	0.886083	0.518822
Dynlt1a	0.841386	0.643204	0.359988	0.970517	0.964224	0.681955	0.75302	0.740045	0.36834
Rexo2	0.840311	0.313822	1.1234	1.07061	0.804029	0.623302	1.02817	0.687771	0.118548
Celf5	0.840182	1.17848	0.0903533	0.941959	1.20728	1.30512	0.425775	0.979221	1.81123
Gm9493	0.840118	0.6641	0.958746	0.639893	0.716954	0.724192	0.748937	0.558343	1.12959
Arl4a	0.839932	0.517991	1.55292	0.260046	0.4131	0.259279	0.194337	0.322317	0.207759
Uqcc3	0.838197	0.929982	0.811038	1.06461	0.966459	0.747505	0.891981	0.860318	0.965145
Prpsap1	0.836349	1.00906	0.960918	0.831847	0.922918	0.805322	2.56586	0.774912	0.854116
Atp6ap1	0.835893	1.14766	0.416068	1.30976	1.16526	1.28732	1.05344	1.47938	0.64405
Adgrl1	0.835798	1.05531	0.459833	0.975925	0.878984	0.770818	0.632435	0.833975	0.736259
Zfp358	0.835303	1.18071	0.431421	0.675212	0.881722	0.615536	0.777141	0.741913	1.51349
Acd	0.835061	1.03321	0.621444	0.748611	1.11515	0.942605	0.811654	0.924536	0.882657
Tnpo3	0.83457	0.704034	0.5334	0.445134	0.678013	0.575265	0.539852	0.598711	0.78555
Fyttd1	0.834544	1.07785	0.63231	0.889551	0.999923	1.01081	1.00675	1.03416	1.5567
2610001J05Rik	0.833056	0.276345	1.77872	0.947589	1.00685	0.544213	0.629561	0.503722	0.265552
Gpm6b	0.832959	1.24649	0.326262	1.08917	1.84862	1.48736	0.846437	0.69614	1.11995
Amfr	0.832378	0.652197	0.53997	0.486659	0.621169	0.628755	0.478563	0.460894	0.503852
Ik	0.83198	1.21029	0.696103	0.698982	0.931923	0.740463	0.903201	0.809197	1.04198
Usp29	0.831959	0.554584	0.2164	0.344938	0.28557	0.634783	0.217727	0.358554	1.40298
Ago2	0.831814	0.256278	0.699422	0.588307	0.62138	0.470894	0.497039	0.317355	0.276516
Tmem2	0.83178	0.917454	0.17505	0.731883	0.851135	0.937721	2.04144	0.838242	0.218178
Eif3j1	0.831525	0.706209	1.14104	0.798035	0.72437	0.998353	0.971056	0.648042	0.512641
Eif2s1	0.830968	0.82568	1.34245	0.854881	0.811594	1.05675	1.23269	1.06085	0.195123
[truncated: 16,191 more rows]

## Sheet: E13.5
Figure 4-Source Data 1 (corresponding to Figure4 and Figure4-figure supplement 1). Average gene expression [exp(logNormalized counts)-1)] obtained from the
Seurat analysis of each subcluster unique to the six developmental stages
Gene expression data are sorted based on highest to lowest for subcluster E13.5-1 starting with Tuba1a
E13.5 SubCluster:	E13.5-1	E13.5-2	E13.5-3	E13.5-4	E13.5-5	E13.5-6	E13.5-7	E13.5-8	E13.5-9	E13.5-10
Gene
Tuba1a	210.485	192.409	138.587	104.826	201.178	47.3564	196.148	205.925	205.484	191.285
Malat1	172.192	143.009	111.393	212.513	164.368	92.0981	298.043	296.984	341.046	248.221
Nnat	101.861	117.739	111.877	65.4785	54.0338	25.5283	91.3808	75.6054	62.6109	75.512
Tmsb10	85.4826	95.148	111.876	71.1004	101.163	57.1562	85.097	77.2407	85.6061	93.2768
Tubb2b	80.8728	72.7455	74.4157	52.8564	77.9675	13.312	85.0363	86.3382	100.04	86.9828
mt-Atp6	76.6507	75.637	90.9805	88.8361	69.9862	70.7895	84.7798	85.2598	88.8878	77.0466
Stmn1	72.286	76.0484	64.3678	58.7415	58.0225	16.3528	99.2929	97.4152	78.7645	84.346
Actg1	64.0971	61.6456	58.3098	47.4042	64.4224	41.2443	61.8399	60.5993	62.4387	67.054
mt-Co3	60.536	56.3299	68.6115	75.2299	56.0073	66.3681	69.0046	71.5277	71.4596	63.6999
Eef1a1	58.8444	62.6347	84.6657	66.3095	58.4878	74.3736	52.7781	53.9894	45.3629	57.4226
Tubb5	57.9963	68.8684	63.8575	49.5803	61.3343	28.3108	62.6854	66.0494	59.6789	63.7534
Ftl1	51.0666	54.232	54.9739	57.0956	49.3112	53.2934	58.3142	53.9247	48.4978	57.0004
Tmsb4x	50.4946	61.6117	63.0655	70.9736	67.4082	36.8462	43.5075	42.7925	40.4274	62.8281
Ubb	49.0086	45.5356	34.6488	48.5702	43.2539	46.5374	47.2208	52.1374	50.0472	44.3055
Rtn1	45.0404	41.0303	40.9088	31.2899	42.3537	11.2412	39.1523	39.9408	41.7576	45.9441
Ptma	43.9643	42.5491	37.8674	49.0906	50.9294	27.0784	62.243	60.3821	52.0825	52.0546
Tubb3	43.2064	43.5635	32.9708	28.3639	43.7113	4.61996	45.7421	46.7882	45.4964	37.8916
Actb	41.4632	53.1122	44.4259	49.2087	44.23	35.7636	44.7319	39.3526	48.6837	46.0616
mt-Nd1	40.0651	42.6224	48.2252	46.3459	37.8976	33.648	39.2975	39.7609	41.5401	35.3896
mt-Cytb	37.5957	35.3858	41.4411	43.8344	34.9008	39.8379	42.9874	43.9195	42.9989	42.6393
mt-Co1	37.1793	33.5795	44.542	45.1243	34.9621	49.6849	40.8716	44.521	39.0237	35.0968
H3f3a	35.3812	31.7216	26.2095	41.3859	36.5119	20.0964	41.4582	41.7035	37.6624	36.8199
Stmn2	34.5622	43.0951	45.3454	23.4216	36.4313	3.47358	27.3785	26.4709	29.4484	39.1946
mt-Co2	30.3509	29.4818	34.6789	34.2232	28.3905	32.8256	32.3194	33.4733	31.3265	29.4471
Ppia	29.753	35.1017	30.1552	23.8849	30.0774	35.2125	21.2638	18.5324	24.5354	25.9977
H3f3b	29.6099	25.3518	20.8015	44.6294	32.0331	20.3688	45.016	48.5768	33.2821	35.6235
Rpl41	29.107	32.0443	40.0306	30.6932	32.1501	46.6317	22.8373	21.863	25.657	26.2468
Hspa8	27.8122	33.7899	34.8463	34.936	27.3912	21.1452	30.4976	28.1299	31.5954	26.0085
Map1b	25.3382	24.1278	23.8438	18.6118	25.2816	3.72651	25.3897	24.3358	22.9661	23.3278
Marcksl1	24.6613	30.3675	28.3985	29.9898	23.088	12.3796	30.8198	32.1006	25.5143	28.7951
Cfl1	23.0212	24.84	21.3989	22.1171	24.4494	13.1049	23.234	24.0099	21.2505	23.4909
Rpl10	23.0079	25.3032	36.1591	20.6359	23.7102	33.6989	17.82	17.6984	17.0464	20.2897
mt-Nd4	22.5604	21.4388	25.2816	25.2277	21.2463	24.2474	24.4201	26.1379	24.407	23.2185
Eef2	22.4204	21.2091	32.8335	22.6327	25.4121	15.3204	19.4442	21.4802	18.8197	20.6657
Hsp90ab1	22.1478	29.78	29.837	30.1595	26.0008	21.6032	20.6456	19.7008	21.1715	18.9359
Meg3	22.0846	29.8802	34.2012	54.44	19.4254	24.9417	20.4891	24.4794	34.8805	70.5631
Rpl13a	21.4725	23.5489	33.4942	25.7019	20.0768	41.2963	17.1961	17.6296	14.2462	19.6554
Rpl32	21.3406	25.1138	35.443	23.8092	19.9818	29.3974	15.7384	14.6897	14.2071	17.1709
Rpl13	21.209	23.5145	31.3872	23.4019	20.3007	40.021	17.8138	16.4453	15.178	21.0614
Ina	20.9741	17.1584	15.6326	8.62086	24.1332	1.81227	13.5239	15.7536	15.616	16.1937
Stmn3	20.9649	24.5007	23.1269	14.3084	21.9408	2.09617	15.7685	14.5912	15.9321	17.8173
Rps7	20.2929	20.9507	30.8096	20.9194	20.1221	26.0985	16.2449	16.0685	15.4624	18.8164
Rps8	20.2648	20.7121	29.7463	21.1008	19.8017	33.9524	15.233	15.3041	14.7213	18.6666
Gap43	20.0161	17.6054	20.184	10.1381	20.6105	3.40826	10.9167	10.0328	23.9416	19.463
Cd24a	19.9237	18.4462	17.4198	17.2439	20.0611	3.6588	30.7912	29.066	25.3239	26.2196
Tpt1	19.9106	19.0181	21.7168	25.5357	21.1802	29.8162	15.9897	15.966	14.2461	18.0929
Rps14	19.5175	21.4117	28.2268	28.2953	19.0029	35.0196	17.2659	16.5708	15.6652	18.2013
Rps29	19.387	19.0147	25.8704	20.7064	18.1224	34.7566	15.6557	14.2128	14.1508	19.6465
Rpl37a	19.1778	18.8717	26.193	22.5327	18.9713	32.0184	14.1997	14.4579	14.3344	17.4982
Rps24	19.0027	17.9009	25.2643	18.8259	18.6875	25.9199	15.0575	13.7879	13.3824	14.1635
Rps27a	18.5122	20.8212	26.8441	21.0721	16.5491	32.5537	15.2665	14.442	13.9851	16.8523
Rpl17	18.1296	18.2378	26.5032	18.1451	18.0252	27.84	13.3337	13.7554	13.4928	16.3223
Rpl11	18.071	21.6589	26.0753	20.186	18.1009	24.8527	15.4881	15.0563	13.839	16.2854
Rpl18a	17.8661	17.4029	24.7872	21.7734	16.3214	29.0884	15.9866	16.6295	13.7222	16.863
Rps4x	17.8291	18.8123	25.7	20.5797	17.5348	36.9375	14.1329	13.481	11.9486	15.7951
Pcsk1n	17.6688	17.5722	22.8401	19.6226	22.7317	1.68647	12.7998	10.8848	18.6691	12.1025
Eif1	17.6513	21.2692	17.2978	20.5803	18.8821	15.3299	16.2848	15.331	14.3244	16.6793
Rpl9	17.6364	19.429	25.8589	20.845	17.5617	29.2338	14.7605	14.1928	14.9107	16.5773
Rpl21	17.5817	18.7858	26.2508	18.5919	17.0204	25.7959	15.3745	13.7643	12.8952	17.2589
Rpl6	17.5687	17.8327	24.0509	18.4468	17.085	23.1071	14.2318	13.7133	13.7549	15.7846
Rps5	17.5335	19.3766	28.6559	21.4627	17.0412	30.549	14.8305	15.3869	12.9694	17.7231
Rpl23	17.3379	19.3408	27.567	18.0946	16.5434	29.442	13.5109	12.6357	11.8172	15.9275
Rps18	17.3252	19.7582	27.6594	19.5429	16.749	33.0107	12.3711	12.0931	11.7887	16.0284
Rplp0	17.0043	17.6575	28.5517	16.8425	15.2632	32.7196	14.6876	15.5019	13.0767	15.7792
Rps6	16.9298	15.9023	22.8069	17.4863	16.8781	22.3512	12.6008	11.7966	12.5908	13.0858
Rpl26	16.8943	17.4386	24.3462	18.1971	16.5828	25.4467	12.8488	12.9833	12.8287	15.5756
Ybx1	16.8715	17.8819	18.8079	16.924	17.3919	10.2206	16.5299	14.7238	16.4131	17.9016
Rpl19	16.5539	17.3153	23.4851	16.9422	15.8592	21.4318	13.1715	13.3126	13.5821	14.3696
Rps23	16.5404	18.0858	24.1064	20.1959	16.0958	27.7307	14.2796	14.1187	11.6941	14.5458
Rpl14	16.444	18.8288	25.0096	17.499	15.8767	28.6535	13.7396	13.102	12.8638	14.44
Prdx2	16.4175	18.8733	14.9984	13.6294	14.1846	7.81398	15.3084	18.1127	13.8659	16.5465
Rps19	16.377	21.4356	29.0658	20.4049	14.6878	27.8937	14.081	13.2778	14.3551	16.5573
Rps11	16.1115	18.6623	24.4282	17.788	15.1187	25.3035	13.8472	13.6869	12.6256	13.9975
Calm2	16.0931	22.6477	23.009	20.7585	13.6074	5.36927	11.4428	14.5714	13.9896	16.2327
Rps15a	16.0602	17.4599	22.4808	18.3136	16.0651	28.0069	13.4521	12.8151	11.6291	15.6277
Rpl8	16.0018	18.9586	22.9831	18.0286	15.5803	24.7615	12.4245	12.0191	12.3843	14.5469
Rpl39	15.9801	15.9718	22.8969	15.3983	15.6911	28.5924	12.0374	11.6049	12.4196	15.3878
Sox11	15.9696	23.2698	16.72	19.7203	12.1347	3.94168	23.0378	23.4642	13.2528	19.3916
Ywhae	15.858	16.1912	11.9363	13.5364	16.2791	7.57442	15.3426	13.9738	15.785	13.9395
Mllt11	15.6946	16.14	17.1165	11.3079	16.9436	1.59123	15.9936	15.8087	13.4831	14.5263
Ptms	15.6069	13.4444	14.0934	11.9218	15.0456	5.01943	16.4813	14.5213	15.4193	13.678
Sepw1	15.4462	20.2708	24.4164	13.3348	17.6903	10.4832	13.037	11.9614	12.8068	16.4501
Rpl37	15.352	16.7201	25.0295	17.8741	15.4107	21.1291	13.4373	12.8231	12.6221	14.4012
Fau	15.3382	15.5178	21.6748	17.1175	14.6185	22.7081	12.8895	13.1027	13.6998	15.0348
Rps3	15.258	18.7475	25.2328	18.3887	15.2173	26.3959	12.8327	11.7366	11.0215	14.2166
Gnas	15.1359	22.3244	22.7421	19.4517	16.7953	24.9147	17.271	14.3206	18.699	15.9843
Rps9	15.1108	17.141	19.9313	19.1125	14.8644	27.1392	13.579	12.8553	12.7356	16.191
Rpl38	15.0823	19.5873	23.063	14.5453	14.937	17.7024	11.6462	11.0037	10.9723	12.5358
Rpl24	14.937	14.8583	20.1745	16.3586	14.4445	20.2905	12.3077	11.5031	11.5229	13.2637
Rps3a1	14.9075	19.1805	27.2636	18.1855	14.7807	28.3751	12.0938	10.9383	11.1633	14.0316
Sumo2	14.896	14.6517	11.4932	15.3842	16.1311	10.4117	15.3027	14.3046	13.5111	14.2098
Rpl3	14.6921	17.5795	23.0722	16.6965	14.6165	27.0518	12.5882	10.6973	11.9771	13.3852
Rps27	14.3813	15.5734	21.2555	21.0385	13.8715	33.6215	12.8207	12.8311	10.9271	14.1242
Cox4i1	14.3575	13.6551	15.3472	11.9601	14.4627	13.9056	11.9959	10.638	11.1289	11.2444
Rps2	13.8781	21.1062	24.244	16.1836	12.7609	23.9787	11.4169	10.5305	10.8606	11.9089
Tubb2a	13.8423	10.5801	8.33104	6.5235	10.4285	2.8674	11.188	12.676	18.0123	12.0622
Hn1	13.663	17.7075	14.9799	15.1439	13.9919	5.02816	15.3379	15.9148	15.0116	16.2231
Rpl7	13.634	14.1753	19.1252	15.403	14.2532	23.2685	13.6455	14.4515	11.3053	13.2389
Rpl4	13.48	14.0084	20.3707	16.6139	13.5639	21.3404	11.6186	11.9526	10.8167	11.6367
Gapdh	13.3863	21.5457	19.1814	13.5215	11.669	14.3326	13.6119	13.1175	13.21	15.2036
Rps15	13.2989	13.0889	17.0835	14.2626	13.5994	20.0024	9.9072	10.8759	9.57835	11.015
Rpl29	13.2251	15.5424	21.1717	14.8305	13.4613	16.4459	10.4884	10.8935	10.0483	12.3578
Rps16	13.069	15.4935	20.1006	16.1497	12.5512	23.7222	11.2937	11.2698	10.4938	12.206
Rps13	13.0284	14.4022	17.4715	14.6933	12.169	21.7652	11.6717	11.551	11.6175	15.0103
Rpl34	13.0211	13.4921	17.9751	14.9639	14.593	19.2353	9.53714	9.67522	8.80466	10.717
Atpif1	12.9522	14.0363	13.9383	10.8325	13.2977	7.61473	9.76799	10.2641	10.2862	12.6824
Uchl1	12.7764	14.6802	10.8914	8.75933	13.8062	1.33721	10.9368	9.29948	14.6979	12.1097
Rplp2	12.7299	15.47	19.9066	14.8861	11.797	20.828	10.8944	10.6797	10.2219	11.0103
Rps17	12.6537	15.0106	18.241	14.245	12.586	18.4439	9.5371	9.40166	9.33022	10.7345
Ywhaq	12.5266	13.5451	9.84458	10.9421	12.4081	5.22593	11.3099	10.8906	10.7893	10.2448
Rpl31	12.3834	14.4351	19.6779	13.9218	12.1653	19.2914	9.76415	9.4756	9.541	11.1623
Basp1	12.2748	11.9189	11.8631	11.1381	15.4204	3.70793	16.2457	18.3648	16.333	15.5168
Rpl35a	12.225	12.1385	16.1876	15.1737	12.0666	19.5081	10.0683	9.06165	8.34998	10.6968
Slc25a4	12.1383	13.9679	14.0306	10.3113	12.1393	13.3503	9.03838	10.5148	11.0578	10.3282
Eef1g	12.1136	14.4899	18.3877	13.9577	12.435	12.0941	9.61238	9.62057	9.05476	10.0436
Rpl27a	12.0874	13.0157	18.2057	13.6995	13.0713	19.7703	10.7338	10.1607	9.83098	12.663
Rps10	11.9759	13.8466	16.5767	13.034	11.4138	17.9737	8.44913	9.30619	8.60631	10.4962
Rpl35	11.9252	13.2649	16.8293	11.0313	11.5778	15.671	9.10952	8.74345	8.70349	11.0133
Rpsa	11.8015	14.2242	18.0946	12.9112	9.74158	17.6879	10.1881	11.2535	10.4347	11.7767
Pfn2	11.7271	10.3533	10.2782	11.2049	10.938	2.21034	9.33606	9.2348	7.55457	10.2899
Rplp1	11.7221	14.6256	18.3942	10.759	11.366	29.2526	8.55205	8.6285	4.78229	10.8496
Pebp1	11.6272	13.7672	12.6672	10.1334	10.3017	6.62615	11.4303	11.6788	12.2134	11.0158
Eif4a1	11.6191	16.2299	10.4644	11.2784	11.1017	8.14073	10.9129	11.8173	10.2928	11.1809
Rps26	11.6177	13.4998	20.0856	12.3466	10.6562	18.1122	9.61965	9.28661	9.58789	10.9245
Rpl36	11.4559	13.0393	16.2612	13.4514	11.4171	13.7174	9.50163	8.7495	8.69885	9.60852
Fabp5	11.435	16.3087	13.0817	8.41481	9.73306	15.1941	9.97861	8.48354	9.92543	10.2934
Hsp90aa1	11.4023	10.408	7.68779	9.3804	10.8802	4.4362	11.4669	13.1192	12.7292	9.49783
Sox4	11.3868	11.0246	8.0605	15.6865	10.4545	4.53291	25.4628	28.1121	15.7581	16.5663
Tcf7l2	11.3859	3.93171	3.15837	1.37633	12.0959	0.874378	0.523517	0.539996	0.498925	0.718877
Hnrnpa1	11.3374	12.3443	11.3332	13.5764	10.6694	7.47112	12.1808	12.8266	11.5287	11.8253
Mapt	11.1635	11.6547	12.5322	5.73082	11.3322	1.37494	12.0615	12.1888	12.2891	13.335
Rpl18	11.1607	11.7823	16.1555	12.1897	10.7352	16.1291	9.24802	9.67845	9.0503	10.1225
Ttc3	11.1032	11.3623	11.6048	13.3479	10.9707	4.46298	13.7817	12.4626	12.2147	11.5233
Eif4g2	10.8526	10.8219	8.77996	11.597	11.9813	6.40051	12.4848	14.2347	10.2819	12.458
Fth1	10.6715	10.3747	11.7099	10.9089	10.4531	23.8962	8.58582	6.91065	8.86378	9.4286
mt-Nd2	10.5974	9.66906	11.3949	11.0845	9.67048	9.76902	10.5419	11.2051	12.0875	10.4971
Calm1	10.554	12.8182	11.1802	9.31442	9.31685	7.80645	9.51493	8.93164	9.28792	9.17938
Rpl23a	10.2982	9.59262	13.6861	10.4271	9.94575	15.0278	8.37865	8.73926	7.60534	9.89663
Chchd2	10.2308	12.5238	12.9653	15.0319	10.5183	9.25627	10.7297	10.1903	9.74622	9.47064
Rpl10a	10.0934	12.5539	15.4483	10.5143	8.97865	16.6616	7.78661	7.07439	8.45576	9.09493
Rpl7a	10.0741	10.9957	12.4753	11.7137	9.57496	12.1767	8.70526	8.92521	8.70957	8.45674
Rps28	10.0215	11.0326	15.4346	12.8295	9.14777	17.4915	9.07738	8.71408	8.13092	9.51916
Snrpn	9.9597	7.34035	9.23332	6.5384	9.67857	1.30523	10.0814	9.37482	8.95181	7.5673
Naca	9.868	10.6962	11.9189	11.1277	9.89428	13.456	8.54989	8.92003	8.41951	9.37315
Dpysl3	9.85505	8.66338	8.02958	4.97018	9.08427	1.45965	8.82195	9.80602	8.36121	10.7783
Dynll1	9.84817	8.43013	6.29229	12.6277	11.153	9.68186	11.421	8.75148	9.48552	7.34326
Gm1673	9.83939	7.71655	8.86011	8.95939	11.0974	2.63729	9.19375	8.98832	9.34082	8.8336
Rpl28	9.74408	9.60736	12.3701	10.8292	9.12046	19.8315	8.35003	8.20845	8.87353	10.2275
Atp5b	9.62651	10.881	7.2606	7.20103	7.95873	10.9077	7.87602	8.73022	9.55483	7.84847
Cox6b1	9.54251	9.388	10.5523	8.60304	9.63772	7.3252	7.62062	7.66886	7.7314	8.62716
Hnrnpk	9.4524	9.28755	5.4539	13.5833	8.77659	7.33155	10.574	12.2792	10.7083	8.36316
Gnb2	9.30573	12.26	11.442	12.0602	9.85226	7.01609	10.5246	9.58728	10.8416	9.91029
Ncam1	9.2925	6.74482	9.0745	8.20632	8.29609	2.20638	10.1494	10.9422	9.52524	8.978
Rps25	9.2881	10.9598	13.776	11.3407	8.45359	13.8786	7.32866	7.62242	7.63084	8.76804
Ddx5	9.25176	9.16582	5.61112	9.99972	9.45667	6.27562	10.2075	12.4276	11.6778	10.6076
Nme1	9.24114	11.5898	9.42393	8.16203	8.17068	3.2398	9.72795	8.7037	8.67092	9.15706
Mif	9.18239	14.7022	14.577	6.86087	6.96498	4.95189	7.23554	6.44164	9.11081	7.29264
Cox7c	9.1803	8.91339	9.6019	9.72212	9.0951	6.53045	8.89789	8.25052	7.42639	9.31682
Ngfrap1	9.13513	10.0148	9.51668	12.7386	9.51831	5.42	6.76029	6.20185	9.86541	7.54392
Tceb2	9.07467	9.44996	9.78856	9.54935	9.98718	7.8181	7.9498	6.73351	7.91117	9.17062
Calm3	9.06449	12.0409	11.6145	7.07536	10.6005	4.53114	7.88394	6.4149	7.62539	7.39881
Nsg1	8.99843	8.20451	7.82851	6.28114	8.70156	1.67206	10.7571	11.3083	9.92516	10.6243
Tspan13	8.98159	3.92079	3.33486	4.34986	22.5409	1.58756	8.18795	6.17545	6.2482	9.11063
Bex2	8.97893	10.0292	9.12136	13.9345	9.72004	1.27656	9.37249	10.2064	8.90235	10.6703
Cox8a	8.88885	9.32393	11.3358	8.72599	8.83829	8.64994	7.86493	7.27548	8.15194	8.62393
Hist3h2ba	8.75935	6.71803	6.48743	7.82007	9.89939	2.00029	16.4021	15.3225	12.0249	9.15719
Pgrmc1	8.71247	9.24219	6.97189	9.68022	7.96713	5.05664	12.6167	12.709	10.7154	13.0627
Cnih2	8.68961	4.08294	5.63649	7.06988	10.2643	1.49003	9.11327	9.05352	8.41777	8.55987
Stmn4	8.60868	5.6964	7.13167	4.97801	10.0251	0.882047	6.90323	8.04526	13.2251	7.06531
Ndn	8.5212	11.8772	9.71842	15.3822	6.70009	3.58723	11.6131	13.7386	17.3036	8.90781
Morf4l1	8.50464	7.12777	5.93512	7.43446	8.85879	6.53177	7.68597	7.46764	7.65569	7.87011
Erh	8.44201	9.50471	7.41415	9.30183	7.64705	5.6034	8.50519	8.09978	7.76775	6.75707
Ptov1	8.33975	10.5669	8.86321	12.3111	9.10164	7.21301	9.88233	9.91958	8.95362	7.25838
Rps20	8.27167	9.67726	13.5016	10.0713	7.79665	21.778	6.79657	6.18586	6.10299	7.52646
6330403K07Rik	8.26739	7.49028	7.77674	10.3695	8.37862	2.19084	11.1915	9.5539	11.03	6.76321
Oaz1	8.21565	8.10347	7.58789	10.3048	8.96633	9.2567	8.6829	9.0462	8.96901	7.46807
Hint1	8.21192	11.3604	10.8569	8.38566	8.04296	5.25063	6.55995	6.46278	9.17868	7.91383
Pkm	8.19688	9.47729	5.5702	7.67088	6.61297	5.10172	8.35898	9.49053	8.00907	8.44586
Btf3	8.15073	10.6422	9.83937	9.81303	8.00692	10.5045	8.11985	7.90431	7.97592	7.47772
Cpe	8.13508	4.87487	5.07605	4.48202	5.71838	0.830514	6.45132	7.68755	7.09001	7.90001
Ckb	8.11633	5.87028	3.83273	3.87499	7.64266	2.10131	5.95861	5.16998	5.94509	6.24072
Rnf187	8.03503	8.0674	7.81419	7.14581	8.2589	3.71709	8.2267	8.09673	8.88677	7.88193
Hnrnpa2b1	8.01617	6.78609	4.16796	7.48946	7.75215	6.28351	7.05676	8.54066	8.23641	7.19647
Cox6a1	7.99761	8.41057	8.47337	5.51765	8.20862	4.51785	5.44455	5.64052	5.92427	6.97944
Rtn3	7.99717	5.93474	5.06746	4.90652	7.55742	2.31206	6.25659	6.63074	5.78513	6.07378
Ly6h	7.91059	7.63753	9.17763	8.51918	9.86234	1.0566	7.19611	6.50503	10.7575	8.95634
Cox6c	7.89363	7.48723	8.66315	7.20968	8.16049	8.35868	6.65693	6.7181	6.90969	6.84571
Elavl4	7.85976	5.53656	5.85921	6.09689	8.10725	0.730985	4.24119	4.16159	4.30662	4.03128
Ube2e3	7.85899	3.52009	3.60227	4.63083	8.15363	2.58101	4.82253	5.1315	6.28922	3.71215
Tuba1b	7.85221	8.2171	6.67265	5.19647	7.44351	13.8648	6.14048	5.415	8.03602	6.90346
Marcks	7.81372	6.97792	6.81069	8.09124	8.45805	7.90074	9.77044	9.50207	8.41055	9.55833
Cbln2	7.80352	0.185804	0.380933	0.503433	6.67145	0.406531	1.06086	6.54858	2.47557	0.692321
Pcp4	7.73652	0.448179	0.461917	0.558905	17.2466	0.476932	1.53686	0.445012	1.15024	0.991282
Gnb1	7.73226	9.79147	10.5614	10.3488	9.29114	4.18137	8.83616	7.7336	7.98415	8.62211
Ndufa4	7.67573	6.94178	7.18648	6.17691	7.65091	5.25898	7.04742	7.6148	6.51742	5.74043
Crmp1	7.63793	8.73994	8.43685	5.53241	7.5512	1.13192	8.63617	9.50175	7.85671	8.2057
Cox7a2	7.62946	6.9616	7.87195	7.07919	7.51199	3.72089	6.4745	6.26365	5.84999	6.22129
Tsc22d1	7.57291	4.59222	4.21616	7.83284	7.74882	6.79477	10.4665	11.0461	13.8772	6.95088
Ebf1	7.56839	0.19442	0.133586	0.532723	5.6339	0.774124	0.344719	0.253489	4.10996	2.43318
Rps12	7.53979	10.2339	13.7918	8.83944	6.48506	16.8328	6.40263	5.66816	5.56407	6.34611
H2afz	7.52253	8.07209	7.11419	11.8483	6.95209	15.0481	10.148	7.83895	9.15875	8.66366
Ap2m1	7.50778	7.30188	6.24985	5.74525	7.77206	4.53215	5.60495	6.29487	6.19128	6.64816
Cdc42	7.48215	6.92848	5.72594	5.86181	7.66718	6.4836	6.37053	6.59713	7.1305	7.47098
Npm1	7.4526	9.96436	8.55566	9.66295	7.10371	13.2214	7.53833	8.03531	7.0556	7.36705
Rpl15	7.42861	8.62315	10.5926	8.11312	7.11395	8.17069	7.38055	7.10969	6.607	7.29109
Gabarap	7.39674	6.20763	6.46657	5.59954	8.86262	9.32021	5.99203	5.51552	6.04968	6.24622
Eif5a	7.35326	10.5202	8.44072	7.32893	7.90919	6.49363	6.83038	5.66445	6.20746	6.45655
Pafah1b3	7.3303	7.99559	5.96735	5.43262	6.91282	2.08005	6.46164	6.48213	6.61064	8.03823
Dnaja1	7.32849	8.21337	5.26527	7.98162	6.85507	4.04782	8.99997	9.57388	8.54923	6.75902
Snhg11	7.30208	2.44376	8.91296	2.08033	7.14507	0.792245	3.97467	2.01917	5.41003	5.66384
Gng3	7.29233	6.04543	8.79459	5.86859	9.55924	0.799178	5.82589	5.30435	6.81733	5.54443
Hmgn1	7.26484	7.31627	5.72875	11.6242	8.41349	8.1494	10.5972	11.4873	7.72502	8.94671
Hmgb1	7.16516	6.93847	4.84869	9.44128	7.56075	11.3651	8.66406	10.5971	10.863	8.9157
Cox5a	7.11633	6.88947	6.51895	4.48669	6.19463	3.09161	5.76521	5.33378	4.36393	6.08574
Serf1	7.10926	6.62995	8.92945	5.09375	7.48681	1.99843	6.23559	6.02888	6.32701	5.6998
Klc1	7.07844	6.45138	5.91953	4.31183	7.47862	1.45277	5.25522	5.24268	4.62244	4.2894
Ywhah	6.92788	7.16508	6.24148	6.82685	7.99462	3.00113	6.28033	7.30062	6.8109	5.99146
Dpysl2	6.87861	10.5632	11.9851	8.07286	8.85915	2.38343	9.02324	7.67457	9.15749	9.72503
Rpl30	6.87461	7.32478	8.69463	8.35333	6.95929	10.3782	5.78816	6.25951	6.87635	6.26397
Mtch1	6.87133	8.8264	9.63548	6.17868	7.50849	6.54153	6.49618	6.52501	6.89848	5.83738
Atp5f1	6.84752	6.84359	6.00624	6.10321	6.16446	4.74126	6.87289	6.09015	5.68323	6.01308
Eif3f	6.77341	6.28423	10.1892	8.1051	6.89259	9.17073	5.81948	6.20175	4.71061	5.79421
Gnb2l1	6.77158	7.32559	8.99481	7.68163	6.46675	8.76813	5.77997	6.02409	4.59866	6.14153
Ran	6.72026	8.32548	6.20566	6.81745	6.54672	6.34117	6.75829	6.96579	5.89364	6.51084
Evl	6.70859	5.82121	6.41229	4.70118	6.75391	1.82536	7.31769	6.92384	6.74307	6.04669
Elavl3	6.70762	7.65165	6.40843	7.14117	7.4199	0.937326	7.10751	7.48647	6.97735	6.60497
Nr4a2	6.6619	0.197329	0.16709	0.338709	5.98277	0.760094	0.970639	6.09108	10.8413	11.5494
Aplp1	6.64839	5.4318	4.98441	5.42772	6.78111	0.82584	8.06951	7.80398	9.06888	7.42419
D930028M14Rik	6.64741	0.211562	3.26915	1.68582	6.13626	0.326124	1.33338	0.142689	5.93912	0.596407
Hbb-y	6.64002	6.03954	6.26257	7.59698	6.86565	6.40678	7.5053	8.25496	7.77932	6.71419
Map1lc3a	6.61698	5.21605	6.90604	4.75824	7.96967	3.99085	3.86219	4.72015	6.78127	5.40898
Srsf3	6.60842	7.67971	5.02185	8.5555	6.9803	5.24905	8.0211	7.19305	7.3084	7.44205
Atp5a1	6.53181	6.09991	5.97302	5.54448	6.00479	7.03321	6.17728	5.96657	5.03528	5.67526
Rps21	6.51094	7.79865	9.70313	8.20917	6.17077	10.3509	5.52483	5.623	5.76443	6.05399
Rpl36a	6.48934	6.527	9.37632	6.02376	6.13005	12.909	4.95252	4.70806	4.73374	6.10285
Islr2	6.48626	5.7521	4.60821	1.29399	7.99725	0.543518	0.639676	0.652094	0.678466	0.522636
Atxn7l3b	6.47002	6.56713	5.98728	7.65996	6.64684	3.51017	8.17114	8.42023	6.52366	6.92514
Atp5h	6.44844	6.32878	5.35692	6.01712	6.19274	6.3055	5.52377	5.53576	6.01555	6.58186
Sub1	6.43369	7.27026	7.51059	9.62415	6.91672	5.05166	6.71745	6.93737	6.40624	5.41775
Pfn1	6.3532	10.1026	10.3645	7.27715	6.39648	14.095	5.9205	4.73956	5.27564	5.16651
Atp5e	6.31571	8.02358	8.82581	7.27013	6.49689	8.48688	6.6569	6.4989	5.95123	6.48376
Tecr	6.30786	6.60445	5.48722	5.14442	5.46962	4.71	6.51124	6.19947	6.8696	5.80512
Gabbr1	6.29103	2.13246	2.47726	1.86995	6.74202	0.810809	2.11584	2.37039	2.88471	2.84391
Cox5b	6.25231	6.56524	6.46982	5.77826	6.0398	5.27337	5.0722	4.54057	5.14081	5.70906
Eif4a2	6.2512	5.96132	7.49944	7.05246	6.86339	4.9009	6.87347	7.50717	7.59494	6.37285
Dynlrb1	6.24761	6.88676	6.91825	6.47854	6.70634	3.88181	6.06196	5.63788	4.8862	5.15594
Gdi1	6.2313	5.80411	3.91394	4.42026	6.05023	1.49633	5.34169	5.82555	5.6544	5.32045
Sec61g	6.22863	7.67114	8.2099	6.96795	6.7015	8.67388	6.00043	6.44233	6.02458	5.8013
Fscn1	6.21027	7.83542	5.48189	6.23515	6.46153	5.18831	7.56218	6.50104	6.08875	5.66755
Atp5l	6.16309	6.88558	7.11399	6.9283	5.92811	4.89929	5.34738	5.26559	5.58334	5.72736
Pou2f2	6.14464	1.76765	3.56327	5.0263	3.34493	0.693902	6.50708	2.53184	7.24205	2.26684
Prmt1	6.10551	6.21757	3.73618	4.22206	4.7763	3.02576	5.60333	6.55197	6.37761	5.76736
Hmgb3	6.02362	11.9356	8.0076	8.5428	6.14511	2.77858	6.44038	10.2748	6.52743	8.50941
Psma7	6.02215	6.98163	5.34115	6.8971	5.92734	3.61301	6.49877	6.22082	6.05347	5.48427
Atp5j2	6.00735	7.28543	7.30382	6.36105	6.5947	5.11962	5.38649	4.91844	4.98176	5.99803
Ddah2	5.98837	4.04189	2.50511	3.69038	8.14923	4.08037	5.53967	5.54222	4.0144	3.7985
Rpl5	5.87675	6.25448	7.56558	6.24082	5.8992	7.79187	5.04285	5.21315	4.2711	5.74828
Rpl27	5.86264	7.17777	7.99488	7.16613	5.42743	6.61574	5.74738	5.41978	5.78614	5.75298
Gpx4	5.84946	5.18212	5.01459	4.84761	6.17376	5.03879	4.65997	4.38214	4.23696	4.90309
Atp6v1g1	5.83605	7.48813	7.21248	7.37321	6.61348	2.87435	5.52256	6.26093	5.44838	5.05096
Maged1	5.83284	5.91463	3.95559	8.78569	4.93582	4.52437	9.82452	9.7111	10.2373	6.23476
Serf2	5.82059	5.43577	6.11574	5.39634	5.99052	14.2335	5.53591	5.11723	4.93968	6.49927
Gsk3b	5.79745	5.47378	5.35289	6.92737	6.84799	2.29797	6.13231	7.08995	6.29939	5.98537
Tma7	5.71611	6.21648	7.5049	7.05556	5.91953	5.19484	6.08365	5.26148	5.8316	5.84176
Rpl12	5.71021	7.7305	9.687	6.17192	5.07047	10.2608	4.21624	3.36157	4.65137	4.94549
Xist	5.67927	4.04739	3.43388	6.1872	4.69941	7.48939	6.1555	5.72838	4.6093	4.77395
Atp5j	5.67633	6.09285	6.4302	6.082	5.75283	6.13328	5.35193	5.06212	5.34612	5.23698
Pfdn5	5.66297	5.60229	6.77976	7.39153	5.94442	6.78016	5.3986	5.26538	5.09343	5.62783
Selk	5.6242	5.83865	4.96234	5.91782	5.80702	3.28944	5.46713	5.42164	5.10337	6.20954
Myl6	5.58526	5.49805	6.01596	5.20474	6.74345	7.14787	4.81829	4.41498	6.09483	5.41458
Crabp2	5.56914	0.992831	0.238152	0.72785	1.58825	1.31454	0.279988	0.579367	0.357496	0.34265
Hsbp1	5.50986	5.24965	5.45	4.96325	6.02444	3.89589	4.93006	5.43193	5.23072	4.93765
Uqcrh	5.50353	5.35108	6.6898	6.36211	5.5005	6.87183	5.123	4.88012	4.37354	5.2318
Slc25a3	5.50336	5.93621	5.35745	4.86221	5.54698	7.06258	4.29973	5.17832	5.34616	5.09678
Ctbp1	5.49904	6.25729	5.48073	6.38427	6.02309	3.08797	6.55109	6.09265	5.47472	5.49632
Ywhag	5.49131	5.15227	5.34919	3.88951	5.66796	1.18442	4.79941	4.82615	4.58176	4.83027
Fxyd6	5.4724	5.84652	7.44213	7.35349	6.35098	3.32884	5.85249	7.15251	8.53053	6.43494
Nhlh2	5.46133	2.78305	1.99316	2.21675	9.82289	0.4668	3.49861	2.19542	3.45802	1.06115
Eef1b2	5.45496	6.61655	8.1536	6.38085	5.01891	6.57756	4.66613	4.76613	4.88122	4.19397
Serbp1	5.41343	4.85892	4.02093	4.21762	4.98474	4.64953	4.58627	5.11123	5.18371	4.86206
Sncg	5.40811	0.189023	0.427168	0.46317	15.52	0.347716	0.21266	0.180636	0.282226	0.873669
Nefl	5.39871	0.732322	4.55762	1.56016	5.56412	0.31475	0.752192	0.34775	1.13837	1.60172
Eif3h	5.30824	4.76243	6.17958	5.86371	5.1332	5.7417	5.17872	5.24964	4.62517	5.61233
Arf5	5.28788	6.92588	7.23928	5.52436	5.27587	7.55469	5.30932	4.98093	6.19034	5.93838
Tagln3	5.25162	5.78714	4.5371	6.85928	6.04586	0.790578	6.29066	5.91262	6.05697	6.22537
Atp5g2	5.20264	4.6979	5.40629	6.48024	5.70834	7.42161	3.58346	3.86213	4.03375	4.4109
Fkbp1a	5.13807	7.51073	8.25315	5.50853	5.53752	4.41752	4.93695	4.41435	5.33549	5.14605
Atp5o	5.12037	4.61953	4.58818	3.09873	4.85058	6.96396	4.05241	3.92784	4.47832	5.42493
Clta	5.08941	5.12202	5.13288	5.21319	4.77518	5.819	4.66495	5.59081	4.9361	5.38166
Olfm1	5.07993	1.65909	1.66501	1.48404	8.08916	0.792671	2.28292	2.26407	1.59559	1.24667
Nsg2	5.04488	3.04503	3.39107	2.72326	5.07476	0.720345	5.06266	5.80275	5.04098	5.17008
Paip2	5.02634	3.1762	3.67021	4.73965	5.54592	2.62062	5.22227	5.47137	4.37103	3.67358
Ube2d2a	4.93865	4.41347	4.0552	5.06938	5.4805	3.19377	5.46156	5.38061	4.58095	4.60725
Dstn	4.92171	5.54932	4.55621	4.32736	5.28742	2.81565	3.87356	3.78346	5.66688	2.92853
Mlf2	4.91004	4.40021	4.51008	4.46675	4.84484	3.05763	4.97248	4.76961	4.45971	4.85011
Atp5g3	4.89539	5.06362	5.06754	4.42338	4.64655	3.44995	3.66245	4.10429	5.00557	4.22893
Rpl22l1	4.88175	7.50743	7.64193	6.02271	4.44888	9.86067	4.02821	3.32805	4.86497	4.37146
Rufy3	4.87785	4.37293	3.8858	3.9833	5.16855	0.688537	3.85513	4.69901	3.36846	4.74898
Zwint	4.8706	5.04218	3.88055	4.65611	5.52882	2.60382	4.48422	5.07395	4.59842	3.65674
Gabarapl2	4.86706	4.1256	4.11688	5.6808	5.30204	1.42085	5.37695	4.73318	4.75701	4.25399
Cirbp	4.86486	4.54681	4.24097	6.70015	5.06422	1.73873	7.99466	8.30506	6.94645	6.88931
Zic1	4.82474	0.203161	0.185468	0.570911	7.0598	7.91421	0.120217	0.0994539	0.113197	0.502923
Jund	4.79165	4.92879	5.55933	7.27715	6.66417	3.2033	3.85632	3.829	6.29876	4.77265
Usmg5	4.7762	5.70446	6.14056	5.69932	4.71169	3.09749	4.54457	4.39853	4.88473	4.51463
Morf4l2	4.76905	7.31029	5.87573	6.51306	4.80904	4.53288	5.06376	5.44565	4.45579	4.98473
Set	4.74435	6.29063	5.2325	5.60083	4.74007	3.85998	6.06331	5.86382	5.45079	5.25409
Arpc1a	4.71461	4.17425	5.48204	4.34057	4.65807	2.84586	4.42779	4.31418	4.58248	3.50713
Eid1	4.70545	4.5906	5.17243	3.51629	4.31358	3.147	4.62668	4.11004	4.43785	4.49961
Rbx1	4.67977	5.27877	4.20364	5.96411	5.15799	4.34896	4.50741	4.74394	4.24972	4.76712
Ubc	4.65957	4.85914	2.6552	4.88792	4.51588	5.90863	5.62914	6.01624	6.04986	5.50697
Irx2	4.64824	0.071963	0.079551	0.185291	3.89695	0.21048	0.133685	0.103108	0.140268	0.105313
Rab3a	4.64302	5.80316	5.20003	3.5361	3.9708	0.702783	4.84316	4.55283	4.54631	3.97351
Sbk1	4.63616	4.26271	4.01457	4.37376	4.49608	0.838194	6.26145	6.54442	4.41496	4.94607
Hdac2	4.62716	5.64848	4.08649	4.7191	4.19683	2.49296	5.65036	6.43672	5.23879	4.48426
Dnajb6	4.62557	3.87326	3.87065	4.93592	4.27275	1.74638	5.08461	5.52278	4.92559	5.23558
Ywhab	4.62215	4.73593	4.93162	4.90767	4.95143	3.03291	5.43627	4.76337	5.15636	4.836
Swi5	4.62174	5.25215	4.68065	4.89184	4.73158	4.37586	4.49827	4.02994	3.15847	4.8993
Ndufb9	4.61673	3.86745	3.62932	3.99884	4.27601	3.13733	3.70527	3.70583	3.45428	3.78913
Ubl5	4.59435	4.69007	4.95711	4.4549	4.06763	3.06145	3.97811	3.86494	4.17297	4.12381
Pou4f1	4.57466	0.116926	0.153886	0.189281	9.2145	0.231126	0.19347	0.221197	0.186788	0.458214
Bsg	4.536	3.79125	3.9675	4.05003	4.37744	9.24156	4.23543	3.54632	4.15102	4.47963
Cox7a2l	4.53422	3.57428	6.24459	5.38716	4.67302	4.97374	3.88521	4.36727	3.79878	4.45022
Pcbp2	4.50131	4.51597	4.49749	6.10548	5.34316	5.49058	4.21022	4.24836	3.42708	3.58574
Rab6a	4.49735	4.72219	4.99617	4.06061	5.0768	1.68752	3.68903	3.52083	4.9191	4.80265
Atxn10	4.49683	3.75244	2.91098	3.25825	4.02925	3.51063	3.70276	4.93572	4.72914	4.35982
Eif1b	4.49613	4.13903	4.25517	4.65647	4.07846	2.66419	4.18011	4.62047	5.12859	4.67
Vdac1	4.48873	4.02577	4.15136	2.90528	4.47294	3.78022	3.7239	3.77304	3.34269	3.26759
Ube2d3	4.48683	5.3168	4.59113	5.98637	4.46291	4.02849	4.3187	4.4033	3.70406	4.06452
Atp5c1	4.44333	5.12638	4.48621	4.37156	4.14771	5.14513	4.35503	4.37965	4.40421	4.03206
H2afy2	4.43347	3.77771	2.89836	3.64828	3.86557	3.09638	5.77599	5.81673	5.41876	5.8588
2010107E04Rik	4.40596	4.63146	5.53098	4.02576	4.55292	3.5142	3.75831	4.04203	3.21689	3.64776
Rbm39	4.40399	3.9138	3.16962	5.75734	4.59635	4.36946	5.72313	5.75946	4.4484	4.33494
Tmeff1	4.38511	5.84531	6.79376	3.67974	4.9722	1.26554	5.37493	5.48755	5.2028	4.75763
Map1lc3b	4.37271	4.2134	4.13199	3.72808	5.15401	2.42207	5.10847	4.5924	4.09098	3.73794
Nedd8	4.36992	4.53678	4.43658	4.50178	4.86308	4.38773	4.20879	4.19534	4.09854	4.66103
Psmb6	4.36939	4.91856	3.68604	4.37041	4.46778	3.838	4.27184	4.35121	3.83485	3.75179
Ube2s	4.36057	4.67024	4.13207	5.44404	4.55925	4.5896	4.62074	4.39388	4.11679	5.27267
Tbca	4.33311	4.71644	4.99953	10.0226	4.50731	3.2407	3.67847	3.26488	3.54354	3.46803
Sumo1	4.33064	4.57882	3.94485	5.81263	4.61091	3.44544	4.38404	4.60972	3.46321	3.86772
Rac3	4.31799	6.62272	8.21513	2.01032	4.29497	1.47691	3.91048	3.1729	4.42962	3.66055
Hmgcs1	4.3172	4.47779	3.53889	2.10558	4.5424	0.806987	4.20115	3.13613	3.72894	3.56847
Atp5g1	4.31356	5.14794	5.70198	4.29039	3.9731	3.77131	4.69437	3.82603	4.50771	4.64033
Atp5k	4.29037	4.67001	4.85653	4.11703	4.23405	3.68567	3.87067	3.32757	3.60963	4.69986
Psip1	4.28736	2.9543	2.42733	3.42527	4.02446	2.33651	4.43532	4.75488	4.28611	5.30977
Cct7	4.2841	4.51767	2.69432	3.55168	3.73247	2.00701	3.77765	4.08524	3.85947	3.56071
Wbp5	4.28268	5.06637	3.8605	8.14149	4.14464	5.50992	5.35621	5.13683	4.48164	4.35576
Snrpe	4.28225	4.30091	3.70856	4.73716	3.8112	3.68231	3.82869	4.61691	3.43238	4.00413
Uqcrq	4.26183	4.44227	4.35097	3.94383	4.29255	3.20717	3.46824	3.02365	3.81324	3.64677
Pcbp1	4.26022	4.86844	4.1734	4.91995	4.0812	5.1679	4.28697	4.41475	4.0083	4.24918
Ranbp1	4.25564	5.90642	4.48483	5.06097	3.74648	3.9619	4.02374	3.44891	3.48777	3.73317
Arf1	4.24581	4.07237	3.29897	4.10156	4.46545	3.54444	4.01242	4.33241	4.13587	4.22486
Ndufa7	4.24074	4.17643	4.95113	4.5372	4.55244	3.95193	3.52717	3.61467	3.64511	3.70346
Necab2	4.2399	0.332242	0.488991	0.576414	16.9698	0.208762	0.502513	0.296259	0.76376	0.490625
Ndufb8	4.23845	3.41248	3.59368	2.86097	4.15584	2.78065	3.43996	2.8973	3.65568	3.64981
Arf4	4.21777	4.35058	3.35048	3.86365	4.0049	4.53779	4.19351	3.6582	4.08361	3.79016
Akr1a1	4.21602	6.16413	6.00213	5.28598	4.5131	5.43704	3.65169	3.93756	3.40675	3.18902
Rsrp1	4.21513	4.3376	3.4735	6.03865	5.2462	4.19636	5.31241	4.92161	5.47935	4.95893
Dcx	4.20221	2.77072	4.10295	3.23042	3.7896	0.712667	5.45504	4.4646	4.72711	4.24798
Hnrnpab	4.2008	4.9024	3.12479	4.37689	3.8251	2.27783	4.37958	4.99566	3.41686	4.2025
Bri3	4.17842	5.55369	5.79687	4.8972	4.38974	2.28482	4.09323	4.20733	3.90452	3.48507
Arpc5	4.1717	4.96853	5.35875	3.79757	4.38384	2.03519	4.25129	4.52563	3.46362	4.19319
Dbn1	4.16757	4.23231	2.59163	4.50493	3.91418	2.27353	5.04606	6.36137	4.78954	3.83562
Fez1	4.16099	4.47941	3.37523	4.40069	3.33352	1.04628	4.7569	6.05921	3.58143	5.10478
Srsf2	4.1586	5.61582	3.64027	5.42464	4.36223	4.5455	5.12723	5.08248	4.87831	4.4709
Psmb1	4.13412	3.81988	3.56259	3.31599	4.03317	3.91135	3.88342	3.79514	3.78539	4.008
Kif5c	4.13382	4.58549	5.29016	4.74986	3.84193	0.634839	4.69966	5.22656	4.83062	4.89804
Rbm3	4.11844	5.48471	4.24219	4.01387	4.02311	6.4905	3.82391	3.49837	3.73874	3.85761
Rab2a	4.1111	4.06088	3.93003	4.41436	4.28797	2.6474	5.14612	5.57851	5.66863	5.45924
Bzw2	4.11073	2.32524	1.65185	1.68896	4.15289	1.4475	3.29479	3.90999	2.56918	4.61019
Mdh2	4.10099	3.88407	3.23455	3.56594	3.79709	2.5937	3.63317	3.36134	3.94483	3.37291
Psma3	4.0892	4.6954	3.30615	3.94837	3.97073	3.29707	4.14883	4.43419	3.65276	3.73613
Uqcrb	4.0869	4.32108	4.15298	4.64371	4.23441	4.54188	4.08487	3.92478	3.9687	4.7337
Atp5d	4.08038	4.19059	4.23985	3.70082	4.21015	5.42343	3.55967	3.55738	3.86697	4.04801
Cct5	4.07029	4.31824	3.66377	3.64376	3.50973	3.3276	4.05648	4.00252	3.76606	3.93376
Ppp1ca	4.06933	5.49677	4.69777	4.57346	5.03514	5.29732	4.05909	3.28355	4.58154	3.68425
Rab11b	4.06882	3.70162	3.39288	4.35117	4.02018	2.38079	4.47835	4.90914	4.53907	3.78093
Ap2s1	4.0625	4.22044	4.33498	3.90684	4.12537	3.52023	3.80346	4.14193	4.33994	4.06123
2700060E02Rik	4.00861	4.04274	4.60274	4.47403	3.83417	4.04906	3.96304	3.99518	3.21047	3.88116
Tspan3	3.99033	3.84611	2.80355	4.38224	3.71525	3.09958	4.47594	4.5607	4.33908	3.45007
Rtn4	3.98406	3.86533	3.18873	3.14258	4.05101	3.83422	4.0411	4.27671	3.57769	3.15984
Gdi2	3.97133	4.5134	4.06586	3.98304	4.31352	3.44234	3.9048	3.80985	3.83636	3.09705
Eif3k	3.93279	3.43982	4.40187	3.52003	3.7488	5.3126	3.4207	3.66148	3.35075	3.74555
Ndufc2	3.92364	3.66865	3.43886	3.18211	3.45852	2.94602	2.82672	3.03634	3.40709	3.44694
Rnf7	3.9103	3.90244	4.12843	3.83525	4.37547	4.20755	4.02622	3.73128	3.63135	4.26349
Ctnnb1	3.89959	1.49967	1.15804	1.8179	4.07811	3.87904	1.66042	1.61672	1.37213	1.48885
Atp6v0b	3.89356	3.66031	3.3531	3.65493	3.78352	1.55946	3.95957	3.67602	3.94434	3.42891
Rpl36al	3.88274	4.99438	5.90318	4.34757	4.22093	4.77442	3.63189	3.28107	3.55572	3.84791
Pcbp4	3.8598	5.18413	5.02996	4.11386	4.23874	1.8335	4.53735	4.35455	3.95486	3.84596
Vapa	3.84607	4.14279	3.89075	3.94065	4.16346	2.50846	3.88552	3.66283	4.64399	4.51854
Nono	3.81863	3.92005	3.22144	4.31644	3.63993	3.59575	4.4428	4.89227	3.37959	4.256
Ube2n	3.80489	4.11097	3.12886	3.42575	3.63816	2.23326	3.41467	3.55759	2.91292	3.62394
Tomm20	3.80176	4.88845	4.5822	5.84181	3.92188	2.9505	3.94667	3.42283	3.31733	3.52536
Cct4	3.77112	3.6364	3.84303	2.73252	3.57552	3.25761	2.80619	3.28687	3.46857	2.77613
Cox7b	3.77024	3.80639	4.40498	3.75269	3.67665	2.7682	3.42873	3.08384	3.41547	3.90173
Bex1	3.76538	4.55874	5.49346	3.76841	3.74005	0.928096	3.71825	2.78617	3.83602	3.1463
Anapc5	3.75573	4.62432	4.82104	3.22766	3.87472	3.15254	3.4322	3.46606	3.55745	3.9892
Tubb4a	3.74845	2.51892	2.39975	2.02333	3.51457	0.375551	2.81046	3.19925	2.52066	2.39
Hnrnpa3	3.74526	4.31517	2.92817	4.14733	4.03289	4.43886	4.29445	4.15626	4.12592	3.51186
Pbx1	3.7442	2.17583	2.62863	3.2652	4.26006	1.82599	2.63519	3.2667	10.0883	19.884
Atat1	3.73854	2.63038	2.43129	2.57372	3.7521	0.84148	5.16132	6.12912	4.59854	4.95118
Smdt1	3.73375	4.79064	4.72098	4.45168	4.16488	2.92217	3.20182	3.00213	1.97164	3.56066
Ywhaz	3.72452	4.4064	4.29634	4.22109	4.44562	1.52093	3.72704	3.41639	3.25583	2.54503
Rpl22	3.71364	4.27274	5.26897	4.32098	3.55068	7.93421	3.29248	3.49297	3.24252	3.20587
Thra	3.70366	6.61016	5.38543	3.98115	3.2227	2.47489	5.9459	5.8095	5.79575	5.08784
Arpc2	3.7024	4.70153	4.74625	4.08588	3.74085	3.3039	3.80461	2.87909	3.9118	3.68444
Cxx1a	3.6975	3.28451	3.86198	3.46401	4.4648	1.51693	3.63786	3.50905	4.02946	3.0097
Hnrnpdl	3.68316	4.51142	2.76322	4.45565	4.13516	2.94122	4.53413	4.39661	4.51174	4.6524
Igfbpl1	3.68126	2.69694	1.13134	2.86696	2.85656	0.40096	5.09193	3.59247	0.240017	0.574778
Tcp1	3.67838	4.11181	3.83942	3.74235	3.53371	2.97469	3.40435	3.73279	3.61567	3.05895
Tmem35	3.66549	0.484506	0.853446	0.408239	1.75169	0.298015	1.76469	1.86331	3.10557	1.3763
Nedd4	3.65623	2.8863	3.35831	3.8974	3.88961	4.63609	3.56761	3.08828	3.17452	2.56316
Podxl2	3.65509	3.28819	3.55116	3.3062	3.19973	1.76304	5.08627	4.82001	4.5553	4.45177
1110004F10Rik	3.63739	3.37661	2.88851	3.72839	3.22114	2.17995	3.49918	3.53445	2.98016	3.44625
Minos1	3.62687	4.43946	4.06208	4.41918	3.82169	4.47359	2.55649	2.61723	2.58034	2.83075
Apoe	3.62521	0.0599407	0.0385178	0.127185	0.0984953	4.8607	0.0716191	0.0708747	0.0693722	0.030986
Celf2	3.62192	4.47482	4.6978	3.4637	2.86372	1.94858	7.19286	10.5473	6.88222	3.32015
Dynll2	3.62128	4.03019	3.97988	3.58217	3.55411	1.1429	3.39653	2.81115	3.48812	3.98746
Cotl1	3.61524	3.2041	3.42251	1.82491	4.82908	2.37283	2.82185	2.51567	2.84944	3.28407
Cdkn1c	3.61067	4.37466	2.70041	4.2075	3.51446	17.5817	2.61555	2.53923	1.30916	7.38501
Ndufs5	3.60341	3.6659	3.77894	3.40586	3.70183	2.55996	3.12169	2.97694	2.85919	3.30313
Cdk4	3.6007	6.23107	4.14925	6.2899	3.53623	5.97497	5.10466	5.14908	3.77008	4.42029
Zcchc12	3.59984	0.978524	0.969373	2.00777	2.15389	0.477881	4.97952	6.60977	17.1501	6.07563
Uqcr11	3.59438	3.94321	4.20669	3.77259	3.78795	3.61519	2.78023	2.86057	2.54616	3.15644
Slc25a5	3.58523	7.85578	3.99751	12.0122	2.99703	3.31138	2.99909	2.80465	2.35795	3.02509
Matr3	3.55853	3.57979	3.18322	3.99504	3.39465	2.03667	4.61978	4.8587	4.41009	4.06709
Nrep	3.54958	1.95167	2.8688	2.63919	2.96129	4.74181	4.82833	4.46808	3.96855	3.53669
Arl6ip1	3.54376	2.47252	1.92859	2.49888	3.49896	2.84467	3.84591	3.61298	3.61653	3.59813
Cacnb3	3.53937	2.05094	2.25016	2.08034	5.59111	0.916514	2.59646	3.02592	1.83916	1.89476
Edf1	3.5215	3.31119	3.25952	3.60654	3.23501	3.22261	3.08164	3.10244	2.92323	3.20306
Zfhx3	3.49722	0.949584	1.62035	2.55169	1.55043	1.08022	6.62356	8.00716	5.12385	5.76541
Ldhb	3.48018	2.79264	1.47086	2.32502	3.251	3.19823	2.90129	3.56698	2.98729	2.49141
Cst3	3.48	3.01064	2.54815	2.18839	3.42116	4.13467	2.38122	2.01157	2.3833	2.48753
Cited2	3.46769	0.922954	0.792254	1.24371	2.56742	2.04724	0.848612	1.39892	0.759614	0.60897
Mrfap1	3.45997	3.42913	3.32387	5.25483	3.59372	6.37832	4.04161	3.50455	3.46047	3.41703
Pfdn2	3.45737	3.93878	3.42649	4.23321	3.35833	1.73395	3.72518	3.24244	3.42578	3.30812
Ppdpf	3.44809	4.45655	4.53013	4.33101	3.2082	2.35173	3.77676	4.19879	2.94426	3.45793
Aldoa	3.44398	6.35628	5.45836	3.05276	3.78577	3.76161	2.3906	2.06046	2.5094	2.62834
Gng2	3.43811	3.86352	4.47171	2.78166	3.15984	1.32502	4.0593	3.42508	3.99246	3.53901
Fam57b	3.43307	2.59994	3.33835	2.16726	3.1399	0.331902	3.76968	3.95985	3.15569	3.0874
Kitl	3.43118	0.0712868	0.0512675	0.107839	0.817285	0.107077	0.0609075	0.163729	0.132329	0.133716
Fis1	3.42187	3.24802	3.57628	3.53972	3.60417	2.89175	3.82325	3.32691	3.40921	4.46684
Fkbp4	3.41953	4.6441	3.16513	4.13736	3.01831	2.48204	3.90454	4.16972	2.83948	3.05228
Uqcrfs1	3.41574	3.03807	2.9589	3.34654	3.11068	2.00742	3.01211	2.92486	3.62088	3.0332
Gpm6a	3.41488	1.89059	2.23983	2.06197	3.00071	0.347414	3.64072	3.74232	4.30196	2.54248
Csnk1e	3.41151	3.42601	3.40001	3.12173	3.38176	1.1017	3.56752	3.06744	3.58544	3.24224
Itm2b	3.41096	0.966226	1.15505	1.88053	3.38996	10.0043	1.81431	1.86914	3.03347	4.29594
H2afy	3.40859	4.05229	2.9348	4.3958	3.01789	2.42003	3.99983	3.65605	2.72761	2.75805
Ndufb7	3.40067	3.38015	3.45411	3.02799	3.09806	2.35905	2.82286	2.09301	2.2686	3.21993
Mapre1	3.39957	4.16532	3.01929	3.32004	3.88276	2.1072	3.26943	3.23007	2.65376	3.72257
Eif3e	3.39744	3.23985	3.94766	3.49834	3.16588	4.31281	3.44662	3.47042	2.74344	3.37188
Cdk5r1	3.39679	3.16889	2.60349	3.34619	3.29357	0.514701	4.25977	3.72152	4.02322	4.421
Cbx3	3.38708	3.64268	3.29702	4.93724	4.28185	2.79191	4.20828	3.98038	4.85294	3.92918
Srp14	3.38348	4.0805	4.13345	3.65794	4.02736	2.36451	3.08877	3.45408	3.56292	2.78757
Idh1	3.38114	3.4876	2.65342	2.18988	3.22536	0.820525	3.01323	3.58743	3.10554	2.44362
Cycs	3.35434	3.79275	3.56014	3.0909	3.21464	1.52062	2.81064	2.74394	2.70405	3.12529
Ndufa13	3.34629	2.8349	2.79321	2.70511	3.18976	4.88405	2.96217	2.47239	2.08309	2.3801
Myeov2	3.33656	3.72146	4.34862	3.99439	3.42576	2.41637	2.77526	3.54567	3.11358	3.26781
Ndufa2	3.33545	3.19387	3.51763	3.7722	3.4788	4.20827	3.03062	2.99884	3.39192	2.84611
Rundc3a	3.32478	2.37901	2.71362	2.63598	4.48909	0.337919	3.37042	2.8178	3.09924	2.63152
Tsg101	3.32452	3.9824	2.46807	3.88727	3.22085	1.28721	3.68074	4.01794	2.54295	3.89688
Psmb5	3.32341	3.50984	2.32788	2.89314	3.07983	2.61162	3	2.90979	3.23034	2.8057
Sms	3.30579	3.91139	4.36302	2.78835	2.81242	0.492851	2.41529	2.42661	3.20025	1.75431
Plppr3	3.3038	2.47145	2.04362	2.14552	3.16935	0.878299	3.41146	3.86986	3.90548	3.10428
Vdac2	3.29636	3.43949	3.21442	3.55223	3.49572	2.50062	2.52086	2.73261	3.33793	2.50497
Sf3b6	3.29612	3.82273	2.80799	4.23639	3.0829	2.16076	3.14899	3.08215	2.67269	2.9245
Nrn1	3.29548	0.128923	0.0940121	0.318119	4.76904	0.131634	0.905394	0.926863	1.75359	1.07344
Park7	3.29324	3.45191	3.06421	2.98261	3.12399	2.6284	3.09689	3.00899	2.61448	2.13882
Ppp2ca	3.28351	3.38724	2.54336	3.28936	3.45912	2.19745	3.46857	3.49927	3.41934	2.76428
Ndufb5	3.28054	3.7123	4.21314	3.78251	3.38421	3.68904	3.16457	2.83217	2.91644	3.45236
Txn1	3.27736	4.57076	3.96742	3.35994	3.19986	4.44487	2.78059	2.57591	2.10583	2.27835
Snrpd2	3.27253	3.26545	3.16864	3.21292	3.37147	3.56156	3.27655	2.9624	3.04651	3.55566
Npdc1	3.26886	3.62125	3.77407	3.06808	3.42424	0.827683	3.25256	3.1903	3.33643	3.42617
Tbcb	3.26813	4.06084	2.84393	2.83572	3.28032	1.81151	2.79917	2.66986	3.02471	3.30954
Sdhb	3.26754	3.55229	3.03876	2.91817	3.26755	2.49463	3.1248	2.64764	3.8334	2.90517
Ube2e1	3.26271	3.1752	3.32913	3.07649	3.47245	1.42531	3.36602	3.42314	2.77715	2.76519
Ndufa3	3.2605	3.45063	3.79239	3.43352	3.67808	4.4914	2.6679	2.74536	2.57853	2.6241
Mdh1	3.25805	2.4412	1.72647	2.52733	3.10137	2.52733	2.58388	3.06066	4.20162	3.22565
Snrpg	3.25726	4.05462	3.5954	5.05886	2.96814	4.04956	3.99491	3.79198	3.22627	3.52729
Rab14	3.25287	3.47119	2.98232	3.87313	3.13229	2.26322	3.49253	3.68602	4.09501	3.0038
Psmb7	3.25251	3.81011	2.80772	3.3415	3.29789	2.36179	3.48509	3.22323	3.18264	3.08872
Pgam1	3.25171	3.4808	2.73052	3.05713	3.08313	2.9159	3.21929	2.75144	2.68499	2.98113
Fus	3.24373	2.61278	2.00237	2.97411	2.79469	3.14848	3.45397	3.75831	3.93725	3.55578
Dctn3	3.24205	2.96311	2.57985	2.80916	3.36722	1.17696	3.28211	2.92311	3.39581	2.28529
Psmb2	3.2411	3.61943	2.6567	3.64713	3.19951	3.00713	2.89461	2.90177	2.23234	3.20717
Runx1t1	3.23802	1.44661	1.06555	1.8045	1.99547	1.38806	3.20577	2.79608	2.19823	3.59214
Arpc3	3.22824	3.37266	3.02797	2.2425	3.14265	2.80301	2.81603	2.62337	2.98409	2.78449
Cfl2	3.21853	4.13189	4.06767	3.97556	3.56788	2.09127	2.92285	3.17739	2.55279	3.91877
Eno1	3.21277	4.31482	2.96379	1.75626	2.79382	2.24178	3.08247	3.45455	2.23656	2.82625
Mff	3.21072	2.96084	2.98231	3.39681	3.3419	1.50017	3.32506	3.33629	3.2012	2.95359
Pomp	3.18958	3.36929	3.20292	3.34752	3.22639	2.43035	2.94084	3.01984	3.01073	3.79283
Ndufv3	3.17785	3.34637	3.86423	3.21307	3.13197	2.99921	3.00922	2.50262	3.28008	2.40182
Snrpd1	3.17673	3.5	2.81097	3.85508	3.24993	2.38928	3.72226	3.59058	3.13413	3.36902
Calr	3.17151	3.6329	2.3239	2.00385	3.31112	5.2194	2.464	2.95877	3.46235	3.10447
Crip2	3.16657	4.10798	3.07715	2.60922	4.39328	0.914907	3.87109	3.42623	3.63528	3.6829
Ndufab1	3.16272	3.141	3.01165	3.13025	2.93312	2.24283	2.99855	2.75792	2.77619	2.66067
Hnrnpc	3.15866	2.84297	2.34082	3.80459	3.1699	3.11161	3.24457	3.76535	3.26935	3.00054
Vdac3	3.15585	3.16051	2.53192	2.84759	3.03452	1.95468	2.8577	2.6058	3.26198	2.37258
Tcf25	3.15021	2.95368	2.9933	2.67305	3.55725	2.01863	2.83952	2.87387	3.35839	2.65909
Atp6v0d1	3.14612	2.63846	2.74057	2.57681	3.13273	1.91706	2.34135	2.87762	2.18919	2.98306
Hnrnph1	3.14487	3.18828	2.3237	3.18652	2.81553	1.93606	3.15706	3.26313	2.79246	3.19639
Dad1	3.14094	2.54317	2.17573	3.12446	2.77409	3.43348	2.328	2.76871	3.43963	4.15106
Atp6v1f	3.13954	3.02807	3.61782	3.47465	3.11459	2.0658	3.14284	2.98081	2.85995	3.0369
Cct2	3.13497	3.30465	3.58789	3.42695	3.34591	1.92888	3.16516	3.11902	3.67348	3.30875
Ppp2r1a	3.13473	3.15343	2.48959	2.63638	2.60223	2.0512	2.74331	2.98578	3.11817	2.24215
Khdrbs1	3.13	3.02241	2.12573	3.32875	3.34117	2.1671	3.57386	4.05593	4.03376	3.60571
Dctn2	3.12862	3.81233	3.79436	2.9826	3.42377	2.27351	3.07433	3.06033	3.04172	2.60869
C1d	3.12403	1.96749	2.31477	2.17405	2.87598	1.53968	2.81556	2.57358	2.79556	2.92397
Celf4	3.11766	2.61203	3.0311	4.56089	6.45507	0.818538	7.40865	10.7217	9.31103	8.48063
Smarce1	3.11705	2.66585	2.19074	3.45587	2.89634	1.82309	3.94264	4.2042	2.70444	3.86099
Bcas2	3.1169	3.09533	2.60355	3.40089	2.90142	1.91902	3.17506	3.25659	3.95366	3.38708
Cadm1	3.11319	0.197552	0.262502	1.49213	3.50235	0.411602	0.789966	2.02623	2.4702	2.45669
Psap	3.10044	1.65695	1.43939	1.65406	2.78023	3.07025	2.30456	2.76509	3.06001	3.4192
Cct8	3.09923	3.34008	2.13621	2.65152	2.60838	2.40955	2.84744	3.1726	2.76122	2.32275
Pdap1	3.09011	3.73695	3.11768	3.24917	2.68923	1.76174	3.38437	3.12624	2.77253	2.67274
Svbp	3.08515	2.47351	2.71979	1.53468	2.89567	2.16838	4.22375	3.48001	3.01372	3.78703
Dmrtb1	3.08513	0.0905756	0.123589	0.324156	1.66811	0.189625	2.59329	1.53428	2.36779	1.51208
Zfp428	3.07049	4.33638	3.94009	2.84216	2.98945	0.811856	4.63709	4.58634	3.17052	4.03091
Ank3	3.06764	1.76	2.2652	2.33792	2.98398	0.531718	3.04534	3.51761	2.42514	2.43351
Mkrn1	3.06404	2.42113	2.14476	2.66629	2.91725	0.812552	3.35115	3.7655	3.42392	3.58974
Pabpc1	3.06346	3.04336	4.77572	3.91394	3.42119	4.39377	2.92532	2.9424	2.66925	2.72648
Psmb3	3.05195	3.39661	2.39501	3.29171	2.80561	2.75636	3.11027	2.77992	3.15988	2.77015
Ube3a	3.04318	2.14656	2.35808	3.05961	2.9864	1.60521	2.95742	3.20728	2.9338	2.18999
Nap1l1	3.03879	2.72544	2.64151	3.22898	2.64316	10.1417	2.66736	2.41669	3.58301	3.67466
Ppp1cc	3.02721	3.22665	2.55241	3.48627	3.00709	2.80212	3.13003	2.95445	2.51173	2.80167
Eif5	3.01918	3.22068	2.50793	3.43743	2.95511	1.82805	3.30147	3.40062	2.53578	3.14955
Serinc1	3.01328	2.22766	1.95067	1.95249	2.42827	1.40804	2.68663	3.26166	3.17907	2.87626
Ndufb11	3.01131	2.43999	2.51295	2.83035	3.4235	3.52923	2.20403	2.43021	2.19433	2.42146
Bax	3.00018	3.29016	2.79631	3.16419	3.07665	1.77273	3.16632	3.01299	2.96986	2.83263
Gpi1	2.99995	3.08983	3.71672	1.86969	2.94157	2.33101	1.65836	1.37934	1.88111	1.57665
Hmgn2	2.99672	1.84744	1.47879	3.94559	3.29851	5.06638	3.14816	2.98833	3.20645	2.99233
Hspe1	2.9949	4.22522	4.65522	4.02891	2.61749	3.63774	3.03056	2.83057	2.46424	2.9297
BC031181	2.99426	2.92752	2.33952	2.90636	3.1356	1.38852	2.62287	3.08951	2.93582	2.86824
Ptp4a1	2.99151	2.43783	2.26399	3.55179	3.08737	1.21017	3.26474	3.59845	3.10654	2.61783
Gnai2	2.98912	5.23351	3.48139	4.72201	3.34175	4.66444	2.28579	1.92642	1.80311	1.13263
Rbfox2	2.98147	3.05762	3.42582	2.91646	2.53364	1.3088	3.81254	3.89725	2.63159	3.98409
Map2	2.97513	1.67953	2.31641	3.22333	2.94764	0.547528	3.87285	3.60539	3.38243	3.05897
Yeats4	2.97494	2.40442	2.34347	2.79495	2.88946	1.22545	2.59958	2.91331	1.99497	2.40476
Nrxn1	2.97146	1.17657	1.57314	1.47995	4.49483	0.389462	2.88031	4.65529	1.83228	2.2217
Dync1i2	2.96769	2.66581	2.20582	2.40116	2.56055	1.67312	3.12745	3.30519	3.11911	3.14321
Caprin1	2.96518	3.0591	2.67457	3.11722	2.95904	1.80436	3.18303	3.25269	2.92345	3.02448
Ndufa11	2.95399	2.9893	2.74129	2.63673	2.90063	2.69517	2.42484	2.24904	2.4553	2.26782
Shfm1	2.94047	3.62669	3.28854	4.89171	2.87813	5.21506	3.00769	2.87719	3.36295	3.09961
Btf3l4	2.9376	2.87368	2.58834	3.55165	2.66998	1.67272	3.11094	3.63357	3.67558	2.40112
Vcp	2.93271	3.26739	1.98366	2.86265	2.86248	3.63753	3.89235	3.77468	2.81354	2.64583
Ube2d1	2.92849	2.40555	2.27188	2.20726	3.19137	0.940081	3.49472	3.4123	3.60702	3.44604
Romo1	2.91973	2.9169	3.2633	3.42613	3.16029	2.69432	2.09589	2.59445	1.9462	2.63856
Srrm2	2.9015	2.64901	2.40789	3.20253	2.63422	2.64837	3.3374	3.12606	3.94548	2.85198
Sep15	2.90102	3.06414	2.70505	3.54039	2.74819	4.3734	2.90465	2.41758	2.23693	3.23648
Uba1	2.89679	3.3689	2.40419	2.35412	3.16901	2.08385	3.7877	4.69117	2.76298	3.11352
Top1	2.89528	2.53162	2.14297	3.19669	2.40971	2.37205	3.5421	3.59589	2.97753	3.31517
Aes	2.89354	4.46357	3.87227	2.16109	1.98139	3.37935	3.38657	3.58391	1.9784	3.17352
Mrpl34	2.88125	2.70613	2.99245	2.69787	2.89534	1.12997	2.55506	2.16878	2.06286	2.03556
Fkbp8	2.88113	3.20353	2.86736	3.05813	2.85651	3.08035	3.03113	2.81296	2.8608	2.74468
Timm13	2.87211	3.16362	3.06512	2.94656	3.07362	2.77779	2.8247	2.70686	2.59103	3.10289
Fkbp3	2.87184	3.47772	2.78609	2.79516	2.7629	2.16837	2.35154	2.23149	1.84204	2.31267
Prmt2	2.86778	2.9796	2.88331	2.90821	3.27721	0.88405	3.63505	3.30293	3.69998	3.07894
Map2k2	2.86662	2.82102	2.71666	2.96488	3.28659	2.14307	3.35178	2.80127	3.18256	2.96253
Tpi1	2.85407	4.80628	4.21333	2.80963	3.27743	3.59469	1.56535	1.21305	2.13564	2.16045
Rab10	2.85237	3.31506	3.40099	2.74401	3.00963	1.59466	2.68635	2.61281	3.06552	3.14826
Ube2v2	2.84999	2.34221	2.02337	2.28735	2.95923	1.25394	3.05834	2.7545	2.36503	3.34753
Prkar1a	2.84902	2.25625	1.92814	3.02014	2.75395	2.05252	3.14426	3.19909	3.17283	2.59739
Trappc4	2.84495	3.631	3.26807	2.6319	2.87145	1.09343	2.71147	2.88055	2.59755	3.14153
2310036O22Rik	2.84257	3.12916	2.91336	3.26627	2.93116	2.0475	3.04161	3.10516	2.87059	3.34895
Zfand5	2.84254	2.52011	2.3328	3.01824	3.86673	1.21009	3.45946	3.2497	2.72407	2.21572
Timm8b	2.83838	2.7529	2.69013	3.08168	3.00586	1.67648	2.61029	2.76634	2.52575	3.19696
Psma2	2.83367	2.97839	2.19985	2.97947	2.78713	2.60672	2.92063	2.76618	3.13226	2.45511
Ndufc1	2.82919	3.06081	3.18303	2.91356	2.73742	2.36517	2.19986	2.41817	2.6439	2.51294
Cct3	2.82356	3.38695	2.13702	2.64673	2.34933	2.06269	2.8391	2.96505	3.10159	2.51274
Reep5	2.81867	4.59304	4.47965	2.00758	3.39917	3.16477	1.89462	1.93454	2.61103	2.72905
Lhx9	2.81577	0.176059	0.173095	0.27453	8.02199	0.153671	0.166896	0.171273	0.076314	0.0983848
H2afv	2.8091	2.07131	1.4901	4.22584	3.14606	6.2069	3.7306	3.73493	2.48965	2.73964
Uqcr10	2.80185	2.71402	3.2483	2.62448	2.98902	3.28582	2.22836	2.17444	2.10933	2.44309
Cd200	2.79992	2.1247	2.106	1.41348	2.50306	0.378578	3.37653	2.70433	3.64137	3.64058
App	2.79977	2.16338	2.18232	1.61112	2.34054	3.6738	3.10993	3.64961	3.87723	7.84946
Psmd8	2.79509	2.56821	2.11291	3.03289	2.75389	2.14898	3.20859	3.08075	3.15494	1.98467
Pdcd5	2.78657	2.9822	2.82114	2.63312	2.50012	2.57778	2.41737	2.18983	2.46091	2.79454
Resp18	2.78037	1.15624	1.47863	1.94796	3.08089	0.211429	2.62322	2.65033	2.72448	1.6048
Rcn2	2.77613	2.34832	1.48424	2.66899	2.53298	1.94396	2.38092	2.86522	1.72707	2.19073
Vim	2.77269	4.749	7.74712	3.10434	3.36582	17.545	0.75269	0.835094	0.542705	2.01978
Cmas	2.76709	2.18788	2.22292	1.81848	2.65983	0.786502	2.48389	2.37856	2.22794	2.21197
Mettl9	2.76468	2.52969	1.99913	2.89117	2.49482	2.3306	2.80533	2.84316	2.62739	2.73976
Sh3bgrl3	2.75868	3.34364	3.43453	1.96765	3.04717	3.49374	2.08664	1.57955	2.20605	1.69709
Ndufb10	2.75639	2.62464	2.4503	2.52326	3.10508	2.58773	2.95614	2.33053	2.51112	2.68235
Lmo3	2.7561	1.97889	1.03262	0.636224	2.41365	0.170358	0.94666	0.830243	4.03242	1.49749
Cmpk1	2.75403	3.05854	2.76296	2.90483	2.84586	1.49822	2.47512	2.75034	2.83392	3.02782
U2af1	2.75206	2.88823	2.01265	2.36302	2.36583	2.22872	2.83102	2.67147	2.83057	2.89944
Brk1	2.75182	2.7483	3.17848	3.31257	2.87198	2.62247	2.23844	2.1934	2.41408	2.57607
Cacybp	2.75035	2.66004	1.96867	3.48703	2.7662	1.08931	3.14822	3.05716	2.96533	2.57204
Tceb1	2.74462	2.84171	2.58838	2.93338	2.79424	1.7301	2.67505	3.06132	2.41354	2.57698
Ilf2	2.74445	2.17577	1.48466	2.20797	2.43172	1.4291	3.17872	3.29553	2.91354	4.15178
Acot7	2.7392	3.40372	3.07927	1.25637	2.05288	0.429694	2.02447	1.56312	2.07797	1.98484
Blcap	2.73787	2.19435	2.21959	2.42989	2.33074	1.39368	2.65016	2.80343	2.72511	3.09636
Gnao1	2.73623	2.41319	3.42002	1.40976	3.22631	0.473292	2.14781	2.09864	1.87895	2.05546
Sfpq	2.73357	3.12254	1.74437	3.52475	3.46488	2.50784	3.68863	3.95439	4.48393	3.90923
Stx7	2.73057	3.15685	2.71417	2.01038	2.85745	0.89858	2.83421	2.12253	3.56338	2.09122
Capzb	2.72546	3.12689	2.95693	3.11182	2.65152	5.76206	2.45035	2.1656	2.6202	2.5155
Actr3	2.72467	3.13438	2.46419	2.40248	2.59503	1.6985	2.63903	2.39033	2.74253	2.18951
Prelid1	2.71323	2.9613	3.23639	2.59931	2.89948	3.65111	2.43938	2.22965	2.20269	2.20557
Dlgap4	2.70792	3.13045	2.83748	2.91564	2.38301	1.1138	3.54334	3.47623	3.16953	2.92508
Ndufs6	2.70783	2.3104	2.64503	2.3697	2.67623	2.31291	2.53149	2.08614	2.33485	2.02902
Uqcc2	2.70092	2.98662	3.38156	2.22155	2.011	2.45396	2.35813	2.21286	2.45941	3.05042
Vamp2	2.70005	2.38155	2.83096	2.3266	2.945	0.750016	2.85504	2.82056	3.15549	2.36075
Nt5dc2	2.70001	1.94953	1.83753	2.13727	3.07718	2.70749	2.32383	1.9494	2.22578	2.10614
Arxes2	2.69947	2.891	2.67445	1.92133	1.91018	0.842705	2.78636	2.78802	2.68461	1.97219
Cisd1	2.69233	1.3781	1.51863	1.56252	2.59363	0.737197	2.18116	2.08169	2.55565	2.52081
Zfp706	2.68613	2.59592	2.6402	3.26335	2.85119	1.89434	3.19828	3.29495	2.9929	3.13118
Hdgfrp3	2.68096	1.94944	2.21416	2.43211	2.78086	0.812305	3.3928	3.83047	3.45848	3.35288
Ap3s1	2.67753	2.36056	2.78657	1.92542	3.62154	1.61888	1.66737	1.54627	2.20489	2.48591
Ssb	2.67558	2.7429	1.65048	2.89768	2.39002	2.26429	3.05688	3.15462	3.17993	2.77818
Atp6v1e1	2.67149	1.88163	1.72189	1.57024	2.56042	1.06867	2.06507	2.32698	2.5777	2.05725
Polr2m	2.67114	2.74041	2.85558	3.33236	2.87691	3.00938	3.16839	3.47698	2.38538	3.4633
mt-Nd3	2.66511	2.64896	3.24301	3.13866	2.36046	2.62935	2.92141	3.05688	3.31868	2.4107
Phb2	2.66474	3.04052	2.78229	2.62986	2.37131	2.84909	2.61837	2.31219	2.60239	2.80979
Tonsl	2.66327	2.60315	2.15944	2.28207	2.41547	1.28958	2.23733	2.2929	3.39257	2.22671
Rnf10	2.65647	2.58235	2.38858	3.00976	2.88421	1.685	3.16446	2.86218	2.94126	3.21374
Rnf5	2.65636	3.05497	2.85709	3.72072	3.00298	1.01948	3.35591	2.95949	2.12224	2.71061
Hnrnpr	2.65082	2.18444	1.45659	2.64782	2.31446	1.76935	3.45938	3.97041	3.01082	2.39819
Myl12b	2.64694	3.03692	3.35086	2.48432	2.52448	1.58642	2.64721	3.25241	2.78507	2.49686
Arl6ip5	2.644	2.2593	2.18875	1.69243	2.16421	1.95472	2.15067	2.27755	1.98736	3.22222
Xpr1	2.63981	3.20312	3.88006	2.04829	2.63664	0.447242	0.934601	1.14426	1.53717	1.03743
Arhgdia	2.63584	4.3726	4.07428	2.61745	2.9102	2.93478	2.47316	2.16746	2.9859	3.14499
Akirin2	2.63372	2.72814	2.16316	2.7857	2.89954	1.76588	2.94243	3.01314	2.79465	2.88752
Ube2b	2.6244	3.1102	2.89126	4.76208	3.22744	2.03095	3.08544	2.97305	2.51242	3.19325
Cnbp	2.6183	3.16762	2.70625	4.02987	2.69739	3.85613	2.43474	2.50427	2.31832	2.27256
Akr1b3	2.61139	0.623492	0.599541	0.382462	1.08902	0.96195	0.73976	0.624308	0.724345	1.91368
Psmb4	2.60104	2.678	2.17936	2.73819	2.41965	2.74373	2.66615	2.60655	2.63138	2.49427
Sec61b	2.59369	3.68328	3.44218	3.195	2.9462	4.74457	2.71716	1.75782	2.44184	2.14262
Mrpl52	2.59254	2.74086	3.18405	2.58735	2.34863	2.09537	2.39067	2.61569	2.66725	2.83049
Parp6	2.58836	2.58766	2.48255	2.25355	2.85854	0.437807	2.66561	2.82332	2.36094	2.89368
Klf7	2.58706	3.9223	2.92916	2.24613	3.52434	0.609961	3.00658	2.38963	3.23023	3.41797
Uqcrc1	2.57336	2.3746	1.52645	1.75853	2.2565	3.40016	2.06101	2.43232	2.72103	2.38379
Raly	2.57193	4.23038	3.76185	3.55416	2.83367	7.3768	3.08938	2.82775	2.71553	2.67544
Son	2.5694	2.16412	1.83056	2.57727	2.45098	2.65776	2.53586	2.80121	2.16114	3.38922
Pfdn1	2.5688	2.49411	2.647	2.37855	2.38907	1.78835	2.02364	2.53804	2.34921	2.36036
Dazap1	2.56758	2.99543	2.20229	2.36278	2.5682	2.14573	3.11712	2.81913	2.80757	2.84393
Snap47	2.56739	2.33786	1.66252	1.49473	1.72615	1.03653	2.30095	2.99461	3.09882	3.23457
Ubald2	2.56661	2.047	1.77118	2.69876	2.73474	1.37069	2.5587	3.06062	2.01567	2.41119
Ndufa12	2.56659	2.80635	2.32601	2.35762	2.47516	1.60272	1.40702	2.16689	1.66119	2.11052
Psma4	2.56344	2.8397	2.18194	2.28866	2.47511	3.5763	2.55424	2.94539	2.35797	2.59346
Ctxn1	2.55122	2.88002	3.00049	3.60785	3.86786	1.01156	2.90806	2.57643	3.21262	3.23119
Ncl	2.55112	3.19997	2.37854	2.66764	2.64819	3.47915	3.15261	3.00104	2.3079	2.84287
Tsn	2.54958	2.43312	1.8019	2.59234	2.31918	1.37451	2.85141	3.17595	1.6921	3.07759
Atp1b1	2.54931	0.831982	1.42298	1.63821	3.31279	0.284712	2.6862	1.46961	5.09247	2.21782
Tmem163	2.54402	0.552792	0.239011	0.358163	2.11481	0.159991	0.711087	1.29097	0.919195	1.23842
Erp29	2.54093	2.84855	2.53458	2.61449	2.6369	3.46818	2.38126	2.30645	2.84696	1.92987
Bnip3l	2.53695	1.54383	1.49439	2.09676	2.98207	2.2912	2.41744	2.13828	2.31262	1.89153
Pafah1b2	2.53657	2.79634	2.29625	3.04319	2.96961	1.48537	2.94028	3.20062	2.42364	2.49297
Bzw1	2.5323	1.85164	1.48421	1.87672	2.1743	1.82933	2.39452	2.42512	2.65314	2.06692
Rac1	2.52717	2.47886	2.32512	2.57108	2.62158	2.90082	1.97602	2.08516	2.79304	2.17651
Rala	2.52331	3.47015	3.4427	2.92348	2.61267	1.29985	2.23727	2.32748	1.69865	2.28885
Actl6b	2.52261	1.86811	1.73852	1.84771	2.35944	0.282242	2.87778	2.93771	2.5098	2.84488
Dclk1	2.51915	2.77319	2.84504	2.52338	2.9229	0.59734	3.22859	3.16504	2.51458	2.53617
Nop10	2.51628	3.04682	3.33874	2.11234	2.39139	2.17021	1.94197	1.98059	2.44647	2.00172
Higd2a	2.51475	2.0076	2.23937	2.28079	2.68436	1.35784	2.03009	1.70402	2.50023	2.20999
Samd14	2.50739	2.05511	2.21618	2.06766	2.57982	0.555434	2.71221	2.89111	2.19334	2.4588
Nrxn2	2.50321	2.27397	2.83068	2.34474	2.3999	0.690078	2.79836	2.97207	3.2164	3.12439
Tmod2	2.50251	2.08602	2.42871	1.84698	2.44151	0.883616	1.95078	2.35755	2.52229	2.56077
Ndufv2	2.49961	2.38564	2.22224	2.30091	2.52375	2.14269	2.40989	2.1735	2.27754	2.7019
Gng5	2.49921	5.56433	6.90471	4.17286	2.85389	7.56214	2.00568	1.59463	1.86805	1.24862
Ndufa1	2.49639	2.32674	2.66503	2.4933	2.68122	1.84789	2.24871	1.71139	2.22394	2.56353
Ier3ip1	2.4842	2.3548	2.55549	2.47046	2.79849	1.28835	2.2519	2.02675	2.29782	2.35214
Vbp1	2.48311	2.62531	2.30977	2.56529	2.52398	0.901045	2.26649	2.54413	2.29229	2.35809
Csnk1a1	2.48214	2.33574	1.99834	3.20218	2.49325	2.57419	2.60296	2.83526	2.91197	2.42935
Apbb1	2.48133	2.42081	2.07817	2.68461	2.92745	0.78168	3.02023	2.54401	3.00792	2.29883
Mrpl20	2.47999	2.8671	2.75444	2.53993	2.62101	1.51059	2.64731	2.40339	2.33101	2.57134
Sept7	2.47928	2.21701	1.64428	1.8121	2.31966	2.56596	2.05585	2.48982	2.21322	2.31546
Srsf7	2.47924	2.84911	1.73557	3.3136	2.42388	2.18928	3.04162	2.69369	2.62431	2.8308
Ndufa5	2.47743	2.11412	2.39589	1.96175	2.30335	2.11507	2.55362	1.9913	2.29802	3.10661
Tmed2	2.47564	2.81574	2.39594	2.68693	2.51039	3.10406	2.53013	2.54656	2.30173	2.40642
Cyth2	2.46419	2.38301	1.85469	3.14614	2.6304	1.10932	4.47389	4.59295	3.3431	3.2673
Ndufb4	2.45796	1.2843	1.51568	1.76829	2.25482	2.06345	1.30081	1.62336	1.48509	1.80332
Psma1	2.45778	2.29907	1.58141	2.17652	2.30357	1.52373	2.42305	2.73518	2.14249	2.22125
Brwd1	2.4558	2.29022	1.93332	2.77805	2.56185	0.737174	2.86485	3.22582	3.17737	2.76371
Rab11a	2.45518	2.58494	2.29414	2.11591	2.98796	1.6997	2.19723	2.02741	2.28956	2.53843
Rbm4b	2.45329	2.17306	1.72958	3.13269	2.24429	1.49454	3.51933	3.3745	3.59514	2.80441
Arl3	2.44939	2.36755	1.69744	2.61539	2.70385	1.48878	2.1454	2.28761	1.68822	1.88565
Hist3h2a	2.44654	1.94683	1.23856	2.02351	2.54506	0.80975	4.21552	4.64055	2.97684	3.85305
Psma6	2.4397	2.20282	1.50889	1.97853	2.14263	2.04961	2.32315	2.61394	2.40723	2.37119
Msi2	2.43806	0.735457	0.476774	0.845747	3.70135	0.769423	0.708053	0.787844	0.822351	1.34868
Glrx3	2.42253	3.18786	2.65423	2.4763	2.5664	2.34562	3.23692	2.02376	2.10959	2.40711
Ppp1r14b	2.42137	4.87726	4.2401	2.77747	2.44526	2.36735	2.63669	2.59878	1.69105	2.47402
Ndufs4	2.4162	2.12627	2.00992	2.13716	2.68507	1.57724	2.42686	2.08649	2.47827	1.72251
Ppib	2.41472	1.97678	1.47613	1.3697	2.2938	8.1271	2.08897	2.12831	2.2998	2.3664
Ubqln2	2.41431	1.84092	1.41608	2.69031	2.30321	0.944019	3.2534	4.0486	2.07981	2.77192
Rheb	2.41414	2.38244	2.03259	2.6036	2.54218	2.30141	2.42433	2.22009	2.65649	2.63531
Fdps	2.41077	4.04353	2.318	1.43311	2.61452	0.632498	2.64507	1.96799	1.96524	2.06581
Srsf5	2.40854	2.50997	1.65565	3.15496	2.57432	3.08621	2.31234	2.89405	2.0016	2.40812
G3bp2	2.40458	1.7564	1.44986	1.84608	2.32647	0.960144	2.80596	3.45663	3.44953	3.06042
Fubp1	2.39614	2.07568	1.63666	2.65807	2.34576	1.36508	2.73253	2.99128	2.40098	2.05485
Fnbp1l	2.39536	2.37183	2.32481	2.50639	2.06976	0.675095	3.36524	3.32573	3.65412	3.40226
2700094K13Rik	2.39294	2.19474	2.1399	2.11642	2.44829	2.32784	2.36567	2.01098	2.31794	2.18502
Laptm4a	2.3919	2.7397	1.8921	2.71636	2.02652	17.281	2.02337	2.33808	1.13793	1.19809
Spcs2	2.38895	2.0424	1.5235	2.24111	2.14485	2.12174	2.0663	2.32768	1.96127	2.17902
Ewsr1	2.38731	2.44833	1.46937	2.86157	2.44166	2.16406	2.55828	3.13078	2.4568	2.98356
Tmem50a	2.38522	2.09298	1.59044	1.50099	2.18206	1.84978	2.198	1.81532	1.65959	1.90092
Smarcb1	2.38111	2.91304	1.61648	2.09045	2.28654	1.8719	2.13804	2.49681	1.91479	1.62085
Eif2s2	2.37274	2.46286	2.27436	1.92027	2.46308	2.2935	2.33076	2.12323	2.60035	2.41441
Mien1	2.36824	2.51469	2.71855	1.79097	2.3441	1.28953	2.08164	1.90982	1.49466	1.65289
Dusp26	2.36242	1.10252	1.80957	1.59466	3.20334	0.24584	1.96677	1.13379	1.59209	2.26852
Trim28	2.36189	2.33227	1.65982	2.7378	2.06924	2.84847	2.94117	3.11906	3.88362	2.84725
Hnrnpu	2.35821	2.79717	2.12487	2.81357	2.27353	2.43682	2.73545	3.1483	3.44982	2.32386
Dcakd	2.35695	2.09864	1.66791	2.36362	2.29728	1.61923	2.69791	2.34605	2.78215	2.06896
Cyc1	2.34774	2.08795	1.57676	1.4381	2.14888	1.67597	1.89416	2.09166	2.40878	2.32552
Lamp1	2.33469	2.25354	2.14315	2.27469	2.32716	4.32605	2.03439	1.95988	2.14563	2.25838
Pgls	2.32756	2.24763	2.56058	2.34886	2.50882	2.63789	2.14847	1.80073	2.21027	2.40922
Tia1	2.32716	1.81706	1.63833	2.93175	2.44055	1.43152	2.83578	3.04034	3.06515	2.80614
Tmem59	2.32467	1.79114	1.41613	2.57604	2.17057	3.19484	1.96122	2.25927	1.98516	1.95429
Rrp1	2.31689	2.19698	1.62072	2.37384	2.20589	1.86431	2.21148	2.59159	2.47009	2.19416
Smim14	2.31406	2.35067	2.57678	2.16052	2.43028	1.17933	2.49665	2.06543	2.43073	2.65988
Kmt2e	2.31046	1.77436	1.69612	2.83438	2.44828	1.08338	2.92914	2.4888	2.89443	1.94906
Scand1	2.30502	1.73518	2.09433	2.30672	2.35023	2.23123	2.58345	2.41783	2.1472	2.75223
Cd81	2.30497	2.00605	1.91852	1.96086	2.37461	10.1243	2.09929	1.84652	3.1246	2.13075
Rprm	2.30467	0.757356	0.951334	0.87923	1.41599	0.232298	2.24628	0.484616	3.34998	1.05262
Rabac1	2.30392	2.43596	2.5083	1.5792	2.27813	2.58063	1.75209	1.14458	1.22779	1.52158
H1fx	2.30334	2.14962	1.91759	3.64353	2.52138	2.51041	2.9584	2.68998	2.43937	1.72096
Stub1	2.30061	2.26296	2.02096	2.61419	2.32151	2.45125	2.14565	2.23831	2.13934	2.80738
Prkaca	2.29894	2.1179	2.24163	2.48197	2.78863	1.42211	2.43609	1.87134	2.19046	2.32954
Celf3	2.29824	1.99013	1.72666	3.39701	2.48038	0.326568	2.23736	2.80237	1.69518	1.74373
Nhp2l1	2.2921	2.98931	2.90159	2.96721	2.2432	1.87507	2.35024	2.45693	1.98183	2.84369
Arl2bp	2.2887	2.73038	2.83228	3.23181	2.7273	1.32299	2.50117	2.31918	1.80415	2.04587
Akap9	2.28827	1.79086	1.86833	1.92992	1.82238	0.743684	3.05994	2.32676	2.40262	2.10014
Acat2	2.28799	3.33714	2.20972	1.74998	2.28433	0.809611	2.32158	2.65927	2.2666	2.42823
Ddx39b	2.2862	2.41638	1.56458	2.89951	2.07562	2.81447	2.37525	2.8417	2.39148	2.33231
Irx1	2.28246	0.0375398	0.0502975	0.0716506	2.19966	0.112668	0.219704	0.1994	0.454171	0.0177014
Ndufa6	2.28171	2.32765	3.18954	3.13956	2.71713	2.11005	2.16446	2.36512	2.06709	1.64493
Chd3os	2.27599	0.745796	1.14699	1.34644	1.82967	0.487122	2.78006	2.53012	3.9988	3.06503
Plppr1	2.27402	0.183726	0.246981	0.226206	1.5546	0.171516	1.29839	1.22362	0.928671	1.15702
Tomm22	2.27257	2.59959	2.28545	2.62679	2.26776	2.52065	2.81704	2.5476	2.23491	2.59972
Fdft1	2.2659	2.7546	1.99601	1.45807	2.26637	0.520918	2.21437	2.1234	2.14317	2.06391
Prdx5	2.26244	2.19493	2.03942	1.67999	2.00802	3.38725	1.90102	1.79949	1.81347	2.07114
Tmem258	2.2592	2.16883	2.12816	2.24565	2.31506	2.63919	2.2381	2.38843	1.41703	2.03386
Tomm7	2.25765	1.99817	2.21141	2.62491	2.02993	1.67328	2.14575	1.95281	1.89409	1.72975
Ndufb2	2.25598	2.0671	2.32979	1.97259	2.47105	2.13212	1.92642	1.85972	1.83338	1.73547
Camta1	2.25493	1.73521	1.68335	2.19228	2.08885	0.757304	2.35834	2.47652	2.47812	1.74695
Metap2	2.25436	2.33626	2.13647	2.4575	2.20775	1.8498	2.24172	2.17507	2.14176	1.94204
Reep1	2.2481	2.77187	2.44419	1.45498	2.55128	0.605816	2.90695	2.89359	2.63011	3.33156
Pja1	2.24703	2.47451	2.26254	2.83671	2.0111	1.54272	2.37915	2.4263	2.59887	1.6733
R3hdm4	2.24034	1.68007	1.61195	1.50454	3.12208	0.972557	1.93901	1.89521	1.58996	1.65503
Nisch	2.2385	2.19613	2.36933	2.76716	2.29886	3.18723	2.71122	2.61839	2.41064	1.6496
Ociad1	2.23727	1.77192	1.48843	1.65602	1.88416	2.1057	1.98554	1.97429	2.22382	1.86599
Skp1a	2.23605	2.08065	1.77079	2.0695	1.97058	1.57897	2.0811	2.27953	2.16662	2.18712
Ube2i	2.23596	2.35264	1.65271	3.18959	2.27865	2.22781	2.76967	2.71649	2.13707	2.48813
Vat1	2.23184	1.89511	2.2659	1.22225	2.76366	0.89053	1.40993	0.965306	2.2882	1.88792
Cxx1b	2.22511	1.91911	2.22402	2.03807	2.51547	0.917293	2.477	2.37666	2.3424	2.77844
Rraga	2.22179	1.63472	1.12527	1.53965	2.19973	1.09388	2.26283	2.61997	2.19035	1.64716
Ttc9b	2.22095	1.66706	1.74891	1.45392	2.40384	0.196261	1.41372	1.10258	1.55318	1.89763
Psmc5	2.21585	1.93518	1.14274	1.48334	1.91019	1.42617	1.56346	2.20561	2.21817	1.43082
Arl8a	2.215	2.12571	2.64193	1.33147	2.28181	0.639205	1.9261	1.9671	1.84046	2.30675
Oaz2	2.21214	2.38533	2.43385	2.92264	2.8166	1.9407	2.63936	3.00604	2.97932	3.11711
Mgst3	2.21189	4.22803	3.76676	1.22607	3.26084	0.479346	1.6425	1.83591	1.3729	2.03343
Mageh1	2.20935	1.36166	1.17588	2.13615	2.21811	1.32838	2.17535	2.6263	2.2918	2.16984
Trim35	2.20803	2.78851	2.1507	2.43258	2.54808	1.26842	3.05688	2.72263	2.52364	1.94222
Eif3i	2.20096	2.56016	2.23172	2.12657	2.19396	2.86804	1.73631	1.93481	2.25793	2.09855
Dnajc7	2.19975	1.71336	1.19538	1.73454	2.05402	1.01382	2.1643	2.17481	2.02261	1.39731
Cetn3	2.19607	2.22003	1.69901	2.3858	2.18924	1.71656	1.77771	1.71571	2.85353	1.98698
Meaf6	2.19586	1.17702	1.02513	1.37903	2.09975	0.764564	1.6058	1.68223	1.75259	2.00914
Grina	2.1954	2.1912	2.17948	1.93858	2.30535	1.32236	2.3438	2.25524	2.15767	3.69103
Rab18	2.1869	1.95246	1.3904	1.87893	2.02693	1.33841	2.24205	2.32347	2.46757	2.08269
Hras	2.18677	2.85927	3.26134	2.29524	2.40393	1.0721	2.01261	1.55153	2.46601	2.15248
Snrpb	2.18561	2.81481	1.91555	3.20808	2.23985	3.12949	2.42552	2.42849	2.56182	1.98295
Ergic3	2.18262	1.90726	1.78518	2.09188	2.04186	3.89362	2.08979	2.03549	2.5192	1.72775
Strap	2.17842	2.73306	2.28154	2.7979	1.87889	1.76864	2.20858	2.20799	1.82596	1.87045
Coa3	2.17661	2.12619	2.30468	1.85947	2.18801	1.63748	2.21579	1.53575	2.11671	2.11527
Cyb5a	2.17341	2.73618	2.53897	1.96506	2.32708	1.99235	2.01111	1.44489	2.06052	1.50382
Psenen	2.17033	2.29852	2.11888	2.12617	1.90926	1.58997	1.55495	1.72064	1.67752	1.46417
Snrpf	2.16873	2.59701	2.42702	3.16193	2.12545	2.25295	2.01191	2.55362	2.03021	2.51494
Gtf2h5	2.16447	2.37379	2.38575	2.39627	2.3383	1.61067	2.38401	2.40003	2.28219	2.3378
Trp53i11	2.16236	2.37068	1.75544	2.7727	5.00032	1.73751	2.37491	2.33627	1.93309	1.43245
Tmem234	2.16182	2.03372	2.35205	1.79808	2.62059	2.33478	1.8376	1.75123	1.68191	1.92064
Rab7	2.15907	2.29823	2.17554	2.34733	2.51355	1.48802	2.13717	2.27433	2.46237	1.42196
Ypel3	2.15725	1.2743	1.70236	2.27793	2.56834	1.50561	2.72854	2.52045	2.55459	2.46465
Cript	2.15685	2.07546	2.26019	2.08768	2.31028	1.01849	2.45455	1.97647	1.91173	1.92521
Uchl3	2.15278	2.15746	2.08044	1.73198	1.55131	0.668148	2.26952	2.36613	2.8048	2.33512
Csde1	2.15143	2.11552	2.4556	2.43729	2.05778	1.52464	2.05913	2.30001	2.02025	2.06464
Eef1e1	2.1485	2.79704	2.31867	1.87922	2.19711	0.507712	2.38151	2.11599	2.51031	1.7573
Slc22a17	2.14556	1.37718	1.19333	1.79415	1.86562	1.08255	2.30223	2.12405	2.2587	1.49611
Onecut2	2.14551	0.152581	0.315848	0.901424	1.89197	0.140463	1.42599	0.286734	1.06539	0.321689
Saraf	2.14463	1.51175	1.51202	1.96216	2.0483	1.38148	1.807	2.26909	2.04768	2.52415
Rnps1	2.14239	2.12457	2.03604	2.03741	2.27878	1.28308	2.21347	2.11953	2.09706	1.88943
Srsf6	2.14236	2.58737	1.83959	3.36439	2.17542	2.4748	2.71413	2.84657	2.16788	2.4151
Cxxc5	2.14171	0.123047	0.147335	1.06702	2.65964	0.809289	0.557088	0.71669	2.29761	1.19597
Psmd4	2.13629	2.15231	1.6012	2.28657	1.9434	1.75633	1.99584	2.26887	1.87642	2.14888
Psma5	2.12858	2.22089	1.99739	2.28457	2.02258	2.76276	2.21542	2.35542	2.30072	2.39848
Hcfc1r1	2.12384	2.16644	2.43239	1.44304	2.25459	1.58491	1.76839	1.91773	1.85513	1.69897
Smarca4	2.12314	1.97114	1.65982	2.04698	2.04888	1.39312	2.45614	2.85676	2.28563	2.24471
Dtx3	2.11622	1.56112	1.4939	2.17267	2.24175	1.29787	2.19466	2.53124	1.90937	2.77936
Stx12	2.10432	2.19412	1.94506	1.78452	2.37554	1.00022	2.02088	2.69277	2.35113	2.55733
Nap1l4	2.09385	2.03094	1.48836	1.68164	1.94707	1.21516	2.14856	3.06383	2.33558	2.41164
Anapc11	2.09161	2.13607	2.07277	1.80181	2.27701	3.21897	2.03361	1.56757	1.93036	2.01879
Tsen34	2.09125	2.26707	1.84509	1.78894	2.02646	3.0358	1.77932	1.61868	2.18597	1.71947
Capza2	2.09023	1.91646	1.47003	1.83909	2.00928	1.52114	2.00598	1.93679	2.20397	2.14504
Rab1a	2.08702	1.97473	1.67971	1.99695	2.1412	1.33611	2.16435	2.54141	1.97774	2.34374
Zcrb1	2.08664	2.05366	2.15421	2.88607	2.14539	1.569	2.16261	2.00054	2.4801	2.36748
Smarcd3	2.08609	1.42162	1.26872	1.54205	1.9046	1.23793	2.10793	1.80728	1.19611	2.14481
Ap1s1	2.08499	2.42046	2.08894	1.87477	1.95475	1.09769	2.17531	1.99669	1.82788	1.67056
Mtch2	2.08301	2.57093	2.02991	2.04404	1.82964	1.62606	1.90601	1.75505	1.54499	1.34207
Taldo1	2.08074	2.46651	1.46972	1.58824	1.89683	1.70265	2.01279	1.9122	1.61304	2.30029
Tusc3	2.07872	1.06583	1.26417	1.33963	2.08484	1.63416	1.86828	2.06213	1.67989	1.80448
Sec62	2.07824	1.65698	1.51878	1.8391	2.09986	2.22196	2.1251	2.02916	1.38698	1.76962
Sptssa	2.07585	2.3212	2.10394	1.84394	2.46026	2.08371	1.7807	1.57277	1.21826	1.62408
Mapk8ip1	2.07509	2.70755	3.05889	2.45411	2.88786	0.61178	2.06639	2.03214	2.8031	1.7242
Hnrnph3	2.0697	1.65458	0.983915	2.19501	1.7392	1.1108	2.25013	2.62829	2.2972	2.02201
Med28	2.06759	2.21656	2.02087	2.21953	2.13939	1.58419	1.83494	2.1087	2.33035	2.04854
Scg5	2.06537	1.53449	1.30373	2.17183	1.9704	0.203661	2.91685	2.26019	2.96069	2.44734
Eif4e	2.06287	1.90994	1.27397	1.79655	1.71049	1.13559	2.30571	2.2805	2.20491	1.81908
Maged2	2.06243	2.27104	1.41256	1.88184	1.81476	5.63886	1.88602	2.02829	1.81463	1.22827
Snrpd3	2.05531	2.50315	1.94102	2.43312	2.18803	1.6423	2.25556	2.42177	2.34927	1.95881
Kif1b	2.05259	1.81569	2.32437	2.06859	2.2653	1.03151	2.16987	1.70234	2.68805	1.88433
Polr1d	2.0517	2.63827	3.13472	2.14587	2.30111	2.39018	2.14173	2.00683	1.50923	2.25729
Alg2	2.04904	1.42892	1.37807	1.3257	1.70144	0.593538	2.01998	1.79879	2.45499	2.33504
Trappc1	2.04826	1.82026	1.95192	1.58755	2.01166	1.86046	2.06207	1.71584	2.29023	1.58791
Srsf11	2.04796	2.36385	1.93177	2.60529	2.02622	2.40541	2.89313	3.30402	2.63568	2.42608
Samd10	2.04765	1.98562	2.47996	1.39044	1.86694	0.275778	2.02889	1.80417	2.1989	2.50861
Araf	2.04676	1.56831	2.25351	2.22091	2.33236	0.894953	2.09678	2.40772	2.36733	2.31492
Psmd7	2.04364	1.88592	1.21529	1.75506	1.63446	1.49042	2.07262	2.08178	2.20125	1.70856
Nefm	2.04175	0.41584	1.30331	0.571334	2.09209	0.20202	0.278238	0.287857	0.382184	1.04362
C1qtnf4	2.04087	1.80977	2.32477	1.26064	0.935596	0.440359	2.83688	2.81567	3.53338	2.27385
Cnn3	2.0353	1.74431	0.765184	1.62201	2.08248	3.13513	2.53095	3.30945	2.75415	2.24518
Polr2f	2.03199	2.16415	1.78133	2.331	1.89293	2.07375	2.13864	1.66836	2.01128	1.39536
Spcs1	2.03197	1.98134	1.82934	1.87094	1.86273	2.91221	1.72986	1.85138	2.51854	1.83176
D8Ertd738e	2.03193	2.38679	2.63947	2.54182	2.1469	2.80786	1.95858	2.06694	1.8031	2.36632
Rad23b	2.03114	2.07392	1.50904	1.87181	1.79812	1.28913	2.12381	2.17415	2.41975	1.57
Mob4	2.03066	1.53397	1.27527	1.84321	1.96565	1.02463	1.93812	1.91593	2.03381	1.60017
Mir124-2hg	2.02927	0.163875	0.115333	0.627507	1.49665	0.202153	3.29599	2.61227	2.63723	2.26018
Dpysl4	2.02482	2.65272	2.13691	1.56371	1.44801	0.221033	1.59339	1.66245	1.33065	1.70433
Csnk2b	2.02389	1.86247	1.61319	1.74598	1.80045	1.67875	1.59621	1.70814	1.89225	1.78935
Ndufa8	2.01754	2.18566	2.02564	2.06906	2.04346	1.5191	1.92465	1.872	2.06972	2.29458
Nenf	2.01718	2.07865	2.37006	1.93999	2.08472	3.4852	1.66671	1.25401	1.61189	1.52684
Ncor1	2.01486	1.4296	1.50073	1.65276	2.29163	2.18115	1.85865	2.05147	1.5009	2.26555
Chmp5	2.0109	1.68626	1.62535	2.25876	2.09632	1.37286	2.14653	2.71619	2.12072	2.25788
Phip	2.00889	1.7849	1.45648	2.96845	2.09781	1.64273	2.07249	1.66423	1.60651	1.78019
Fam103a1	2.00785	1.52574	1.75605	1.9865	2.16118	1.13625	2.36343	2.19368	3.08546	3.1605
Sf3b2	1.9998	1.81781	1.45119	2.04464	1.71973	2.02424	2.58564	2.76195	2.7555	1.89172
Mrps21	1.9995	2.0458	2.1597	1.94972	2.10751	2.05242	1.65223	1.81624	1.35955	1.49081
Mbd3	1.99585	2.52175	1.93956	2.51998	2.29054	2.03077	2.04529	1.99248	2.22366	1.2923
Zc3h15	1.99423	1.97129	1.77855	1.98477	2.18414	1.34297	2.47833	2.19547	2.22611	2.66059
Gtf2a2	1.9919	2.04967	1.83763	2.19974	1.95089	1.52004	2.20495	2.05222	2.30646	1.90063
Cfdp1	1.98672	2.17658	2.22173	1.95832	1.96658	2.28696	1.97243	1.95328	1.92578	2.19967
Gm10076	1.98123	2.06064	2.67435	2.17211	2.04694	2.92872	1.6258	1.45291	2.0357	1.66181
Atox1	1.98014	2.18073	2.76851	1.6114	2.06556	3.01625	1.68767	1.68602	1.31459	1.68015
Camk2n1	1.97719	1.18737	0.798941	3.18234	3.039	2.65289	2.20352	3.03737	5.44523	10.5421
Gpx1	1.97655	2.11893	2.4748	1.50649	2.16276	2.2557	1.63378	1.45564	1.46428	1.8142
Mmd	1.97618	1.46176	1.56576	1.51236	1.96816	1.61831	2.11439	2.41461	2.52075	3.15603
Rab6b	1.97591	1.67146	2.00421	1.58451	2.42206	0.43395	1.8046	2.0007	1.87609	2.06647
Cnrip1	1.9713	1.39598	2.37935	1.38729	2.02075	0.801002	1.34086	1.32396	1.89721	1.21969
Tnrc6c	1.96985	1.67961	1.81128	1.9685	1.50806	0.934383	3.87813	4.67314	2.00712	1.3602
Tprgl	1.96601	2.08195	1.87404	1.51628	2.6628	1.65443	1.41193	1.42911	1.13712	1.14879
Pfdn4	1.96219	2.01451	1.6983	1.98046	2.1945	0.701198	1.71038	1.6547	2.2736	2.78954
Arl4c	1.95859	1.54754	1.62634	1.52449	2.33397	0.238211	1.61302	2.64113	1.71537	1.46108
Mat2a	1.95725	1.7978	1.30713	2.06367	1.64572	1.69219	2.25	2.1504	2.74975	1.82496
Ssbp3	1.9564	1.89247	1.82429	2.53609	1.78773	1.44349	1.94497	1.988	2.24803	1.52815
H13	1.95065	1.62087	1.24893	1.58623	1.79922	1.32309	1.59451	1.65646	1.64613	1.80107
Prdx1	1.9491	3.93156	2.25491	2.58107	2.2335	6.07438	1.94423	1.64537	1.92677	1.02911
Higd1a	1.94711	1.93342	1.79596	1.76753	2.0116	0.961538	1.79251	1.81031	1.49955	1.75911
Palm	1.94549	2.00836	2.0787	1.78374	2.43046	0.661583	2.46221	2.2096	2.08239	2.62017
Fam171a2	1.94518	1.80938	1.6414	1.28004	1.94509	0.652018	2.76149	2.22457	2.56253	2.75334
Dnaja2	1.93777	2.15082	1.73017	1.82559	1.70875	1.55555	1.8702	1.91106	2.04673	1.40886
Carhsp1	1.93285	3.24219	2.73709	2.63504	2.26428	0.552573	2.90862	2.295	1.6653	2.33397
Txndc17	1.93227	3.00142	2.95677	1.90606	2.02739	2.35226	1.56549	1.13497	1.59406	1.73539
Hspd1	1.9319	2.24397	1.66031	1.4554	1.72886	1.96262	1.7201	2.06265	2.33936	1.27212
Klhdc2	1.93189	2.15896	1.71994	2.47953	1.95647	1.42608	2.21069	2.60415	2.29868	2.02703
Hdgf	1.93128	2.20031	1.89085	2.48424	1.86812	1.95644	2.34271	2.28732	2.13786	2.12629
Ntm	1.93048	0.236692	0.472355	1.87408	0.421915	2.11721	2.46263	1.02579	5.70832	0.655173
Emc10	1.92984	1.86706	1.54505	1.63223	2.06021	1.90616	1.90865	1.81261	1.98265	2.16936
Ciapin1	1.92837	1.47442	1.09116	1.44932	2.01264	0.799402	1.25479	1.26776	1.40904	1.58832
Tpm3	1.92752	2.7454	1.96579	2.00782	2.11744	1.14027	1.93028	1.76007	2.03968	1.47818
Tra2b	1.92576	2.22277	1.40017	2.58055	1.81465	2.04908	2.20356	2.36784	2.49149	2.43108
Krtcap2	1.92302	2.17623	2.085	1.71735	1.69479	4.15725	1.82197	1.68748	2.03915	1.95561
Cuedc2	1.92256	2.10816	2.02939	1.67945	1.95163	1.69228	1.6804	1.65441	2.09743	2.14383
Srsf1	1.92109	1.90135	1.43663	1.97288	1.89075	1.31782	1.98799	1.97456	2.14678	1.49008
Usp22	1.91856	1.75587	2.21034	2.08143	2.0443	0.786026	2.14652	1.98131	2.66042	1.8684
Fam195b	1.91676	2.22966	2.3793	2.33401	1.98987	2.73478	2.16792	1.84765	2.376	1.7572
Ndufs2	1.9155	1.7167	1.6286	1.64471	1.89763	2.3415	1.83252	2.10548	1.62678	1.80408
Ndfip2	1.91525	1.57429	1.56319	1.65875	2.14135	0.721952	1.73271	1.55331	1.55078	1.6475
0610012G03Rik	1.91	2.27418	2.57915	1.85736	1.95605	1.9632	1.78865	1.98046	1.99081	1.71749
Cdc37	1.90919	1.49236	1.25803	1.63177	1.93791	2.36349	2.02473	1.84705	1.68848	1.64886
Rtf1	1.89792	1.76281	1.39505	1.95624	1.63152	1.28754	2.30361	2.25185	1.89161	2.24823
Rnf165	1.89512	2.14853	1.87194	2.37927	1.70929	0.442067	2.75269	3.11729	2.00857	2.21475
Rbm25	1.89332	2.04209	1.40516	2.09939	1.76589	1.46685	2.2315	2.37729	2.01962	1.99396
Hnrnpa0	1.89254	1.98542	1.91085	2.6475	1.7732	1.82546	2.4867	2.6104	1.68155	2.11045
Serp2	1.89242	1.35255	1.85607	1.97952	2.02429	0.387495	1.55749	1.71545	1.9542	2.24105
Sgta	1.89171	1.9062	1.29322	1.79309	1.79839	1.23323	2.10998	2.26372	1.98333	2.04275
Hba-a1	1.88663	1.8129	1.86359	2.40642	2.00322	1.86952	2.25003	2.51685	2.23598	2.04291
Cops6	1.88514	1.81911	1.19381	1.74988	1.93306	2.41823	1.9573	2.08022	2.21076	1.99283
Dda1	1.87857	2.61991	2.58852	2.11043	2.13461	1.07935	2.118	1.66003	2.1396	1.88072
Ank2	1.87825	1.97379	3.10769	1.23547	2.82963	1.18975	2.3299	1.61287	2.05869	2.0436
Puf60	1.87706	2.02443	1.05056	2.05596	1.48727	1.86381	2.04833	2.35219	2.35281	1.74418
Rsrc2	1.87685	1.66684	1.34565	2.58839	1.82892	1.42856	2.291	2.56558	2.06524	1.99313
Chn1	1.87319	1.43531	1.51033	1.41128	2.1258	0.319963	1.98404	2.24768	1.50221	2.19575
Pdia3	1.87062	2.85897	1.76817	2.0858	1.55759	3.6867	1.88434	1.68353	1.63446	1.64197
Tspan7	1.86995	1.30667	1.33878	0.973725	1.1635	1.3148	0.984515	1.06208	1.81022	1.23587
Trappc6b	1.86896	2.06321	2.09961	2.27961	2.28175	0.972668	1.87538	2.10652	2.16946	1.48649
Ptbp2	1.86616	1.58873	1.30492	1.47088	1.57168	0.451884	1.89146	2.21763	2.13431	2.22839
Bex4	1.86613	2.5548	3.08014	2.10071	2.05513	0.68756	1.87357	1.52326	1.73954	2.23669
Nipsnap3b	1.86432	2.23284	1.84071	1.35058	1.96489	0.670752	1.74295	1.92074	1.78781	2.40586
Sox1	1.86204	1.18137	1.15579	0.73441	0.716875	0.14066	0.141018	0.170514	0.105132	0.0531041
Brd3	1.85888	2.00818	1.60855	2.25104	1.85264	1.15381	2.16062	2.66345	2.33411	1.89833
Meis3	1.85711	2.2703	2.54368	1.60152	1.94159	0.797308	2.12361	2.08572	1.60219	1.49025
Rnf14	1.85575	1.94021	1.77785	1.64366	2.10442	0.569502	1.97236	1.78448	2.1691	1.94948
Ctnnbip1	1.85384	1.9326	2.06129	1.35871	2.98083	0.965739	1.71405	1.76182	1.44835	1.55278
Bag1	1.84941	2.37183	2.6735	1.73409	1.88216	1.74918	1.4992	1.45878	1.75813	1.61024
Vps29	1.84406	1.82284	1.25307	1.40142	1.68297	1.44728	1.70098	1.53186	1.7264	1.56997
Lamtor5	1.8415	1.62576	1.5501	1.47306	1.97571	1.44544	1.34295	1.69648	1.18417	1.32564
H1f0	1.84062	1.90592	1.14957	2.53836	1.78018	5.58272	1.87158	1.9453	0.925949	1.16406
Esd	1.84016	1.95956	1.92348	1.5991	1.63945	2.73154	1.42722	1.69858	1.968	1.91591
Txn2	1.83996	2.21312	2.06623	1.66212	1.71148	2.0555	1.57347	1.97846	1.18345	1.78101
Ssu72	1.83735	2.04852	1.75693	1.94241	1.80845	1.35041	1.54783	1.48212	1.25283	2.07175
Psmd6	1.83653	1.55923	0.95171	1.06731	1.48296	1.37896	1.51045	1.85634	1.39131	1.45037
Pin1	1.83565	1.89039	1.69143	1.94505	1.97905	1.20157	1.84022	1.52624	1.66565	1.68015
Strn4	1.83499	1.49524	1.46117	2.0377	1.90825	0.92077	2.22116	2.31824	1.42637	1.59342
Gm2694	1.83125	3.41478	3.98149	0.525862	1.14807	0.317201	2.21057	1.17407	5.42315	3.11811
Nap1l5	1.82768	1.53727	1.42883	4.86231	2.04001	0.251675	3.05377	3.65574	2.9575	0.889398
Dner	1.82486	1.8887	2.08873	1.13772	1.45805	0.359828	1.81006	1.86721	3.07625	2.33319
Golga7	1.82457	1.64542	1.65048	1.65724	1.92459	1.20689	1.61633	1.75732	1.64399	1.44977
Luc7l3	1.82437	1.86195	1.61978	2.18759	1.81847	1.48397	2.42186	2.26624	2.23428	1.63809
Pafah1b1	1.82425	2.07329	2.19296	2.14502	2.06644	1.4033	1.82508	1.6068	1.52564	2.03994
Guk1	1.82367	2.14634	2.76105	1.2076	1.67459	0.670206	1.86495	1.52961	1.53404	2.02422
Stard3nl	1.823	2.74367	2.90739	2.08807	2.32629	1.38635	2.02649	1.72722	2.13768	1.75746
Pnisr	1.81973	1.2146	1.21557	1.94411	1.61921	1.11735	2.58805	2.64838	2.31541	2.07132
Tmem167	1.81787	1.43675	1.43844	1.876	1.92647	3.93539	1.46055	1.16821	1.32122	1.70896
Psmc4	1.81778	1.71555	0.993152	1.49577	1.47341	1.4216	1.72259	1.86916	1.57003	1.34028
Nr2f2	1.81703	0.604375	1.08666	0.423982	0.736066	3.38096	0.144417	0.172926	1.26293	0.667272
Rab3c	1.81599	0.482351	1.14233	0.868228	1.63765	0.22208	2.69418	2.99256	2.52524	2.75214
Prnp	1.81518	0.574985	0.532938	1.00491	1.75688	0.658372	1.20496	1.27592	1.39696	0.684032
Uba52	1.81415	1.98563	2.57685	1.9523	1.76167	2.80963	1.83948	1.78118	1.6075	1.97243
Tceal8	1.80862	1.76302	1.70799	1.84539	1.71631	2.30339	1.50958	1.57935	1.64819	2.19559
Sf3b1	1.80643	1.436	1.01336	1.65823	1.5424	1.6668	1.81742	2.06285	2.26907	1.81406
Cdh2	1.80622	1.89537	1.74623	2.01453	1.50736	0.376477	2.26176	2.60801	2.00221	1.34325
Nxf1	1.80348	1.68169	1.37006	1.76944	1.74645	1.76317	1.8922	2.14451	2.24467	1.8236
Chtop	1.80286	1.75193	1.44197	2.10745	1.78361	1.32352	1.9698	1.87378	2.36609	1.81869
Dnajc5	1.8013	1.40712	1.76072	1.74138	1.98687	0.813933	2.15087	2.069	1.70792	2.36248
Sqle	1.79918	1.9441	1.42115	1.19402	1.84271	0.517251	1.95427	1.68113	1.72573	1.27298
Psmc2	1.7991	1.48576	0.862237	1.25112	1.5201	1.32592	1.34312	1.65518	1.76139	1.3679
Cbr1	1.79492	1.1695	0.825468	1.32163	1.53806	0.65886	1.60052	1.84034	1.76748	1.77256
Polr2j	1.79451	2.04269	1.71837	2.35158	1.76213	1.35808	1.86922	1.95476	1.72459	1.734
Ndufb6	1.79189	2.20355	1.96164	1.71468	1.7439	1.66548	1.79537	1.44179	1.53998	1.11246
Pbrm1	1.79021	1.71567	1.54875	2.40064	1.88318	1.58696	1.93388	1.63406	1.58285	1.55529
Sars	1.78973	1.62612	1.53239	1.30462	1.58527	1.01477	1.53554	1.67219	1.51013	1.61732
Armcx2	1.78554	1.34928	1.13005	1.40348	1.54711	1.75546	1.25895	1.20807	1.19151	1.33749
Atp2b1	1.78455	1.10862	0.79733	1.15301	1.31723	0.659405	1.62165	1.46674	1.29351	1.58437
St13	1.7839	1.96103	1.84709	2.44915	1.98847	1.89812	1.97254	1.69698	2.14637	1.74143
Fam69b	1.78098	1.69668	1.61204	1.26467	1.42118	0.623312	2.05179	1.94271	1.82799	1.84135
Ndufa10	1.78085	1.58181	1.42568	1.53403	1.45426	1.63972	1.56911	1.66457	1.38321	1.05649
Actr1a	1.77857	1.65698	1.36896	1.3994	1.78135	0.769382	1.74715	1.86585	2.0137	2.03593
Ppp1cb	1.77838	1.48786	1.2974	1.61245	1.63421	1.07017	1.96155	1.64675	2.33837	1.46139
Denr	1.77653	1.88819	1.85191	1.72146	1.90822	1.57181	1.91525	1.70664	2.05174	1.84029
Dgcr6	1.77562	2.24873	2.27744	1.83285	2.13674	0.875847	1.57672	1.68232	1.77279	1.58059
Adprh	1.77542	1.68657	1.17139	1.40368	1.63722	1.86009	1.54168	1.64797	1.44606	2.15354
Sumo3	1.77398	2.05206	1.96906	2.15998	1.92895	1.92166	2.42359	1.92249	1.5769	2.04902
Ccdc88a	1.77259	1.80448	1.87726	1.93493	1.83846	0.936204	2.02138	1.76005	1.42687	1.42528
Prpf19	1.76937	1.729	1.16237	1.65778	1.33788	1.62592	1.65905	1.46982	2.38933	1.57573
Negr1	1.76897	0.464191	0.373825	1.04451	1.73901	0.256612	0.664624	1.14669	0.458924	0.686791
Pak1	1.76818	1.80441	1.91447	1.66916	1.53211	0.345396	2.45884	2.56558	1.95538	1.4716
Sh3bgrl	1.76643	1.2446	1.84216	1.82628	1.75633	1.53923	2.28049	2.36546	2.85082	1.94826
Pam16	1.766	1.77619	1.92369	1.8578	1.74739	0.906119	1.63158	1.51142	1.6047	1.53065
Atp6v1d	1.76588	1.2848	1.32288	1.46182	1.90905	0.85555	1.91164	1.87057	1.98866	2.00088
Tkt	1.76558	2.41115	1.92514	1.18036	1.55129	1.92222	1.2877	1.03865	1.5108	1.43257
Soga3	1.76258	1.67691	1.32416	1.54565	1.84969	0.281542	2.09388	1.76265	1.54466	2.17452
Scd2	1.76043	2.62396	2.64038	1.96878	1.84874	1.32794	1.46643	1.32406	1.42659	1.46841
Mcrs1	1.7597	1.7191	1.50423	1.49506	1.71692	0.825586	1.50437	1.79925	1.80269	1.87299
Itm2c	1.75938	0.960536	1.06861	1.43699	2.25419	4.98943	0.981827	0.751867	1.33453	0.762958
Epn1	1.75665	1.7102	1.90734	1.79117	1.83965	1.1986	2.22451	2.22675	1.79252	1.87852
1110008F13Rik	1.75591	1.46277	1.39947	1.13684	1.72859	1.67087	2.01811	1.57276	1.62698	2.05574
Uqcrc2	1.75566	1.52636	1.27294	1.46904	1.61613	1.56445	1.73183	1.64705	1.68771	1.9317
Syt11	1.75519	1.58545	1.96966	2.43877	2.09035	0.338702	1.84028	1.76894	1.69276	1.6554
Trappc2l	1.75448	1.54399	1.66544	1.81803	1.75355	0.881036	1.86638	1.65324	1.96994	1.67469
Ndufb3	1.75406	1.80407	1.68436	1.99286	1.75474	1.45624	2.0172	1.72994	1.91327	1.53995
Ccdc124	1.75403	1.64411	1.27768	1.42424	1.59358	1.07964	1.82762	1.61064	1.7297	1.59522
Kifap3	1.75367	1.24378	1.30839	0.97863	1.45085	0.852246	2.00489	2.14982	2.43791	1.69273
Chd3	1.75175	1.44355	1.38329	1.28193	1.56935	1.43239	2.58168	2.44233	1.1851	2.17219
Epha5	1.75166	0.258017	0.229588	0.396443	0.525824	0.137663	0.750703	1.06547	0.723731	2.74271
Lin7c	1.74989	1.4173	1.35044	1.45791	1.86467	0.451356	1.91861	1.87315	1.78519	1.71157
Gstm5	1.74663	2.30507	2.17294	1.73238	1.54707	2.08216	1.29763	1.14969	1.39643	1.08996
Mpc2	1.74574	1.20639	1.25678	1.32306	1.83778	2.15602	1.46019	1.23712	1.34028	1.03819
Mrpl30	1.74396	1.57502	2.07979	1.94644	1.81578	2.21873	1.71926	1.40214	1.50056	1.58448
Mab21l2	1.74348	0.0459495	0.0206083	0.0529837	1.93434	0.0650802	0.00634326	0.0625714	0.0429535	0.162788
Spag7	1.74217	1.55198	1.34706	1.74118	1.92248	1.67515	1.49187	1.59858	1.45823	1.15536
Bbip1	1.74197	1.67741	1.77825	1.40792	1.74303	1.01231	1.38986	1.32802	1.41573	1.48861
Gramd1a	1.74152	1.83402	1.64513	1.86979	1.79196	0.672898	2.45284	2.43595	1.87886	2.30579
Nabp2	1.73929	1.93255	1.94214	1.93264	1.545	0.877621	1.95468	1.70158	1.64995	1.7115
Zfand6	1.73876	1.08572	1.00975	1.60605	1.92575	1.1352	1.77005	1.95434	0.77152	1.64368
Rmst	1.73738	0.855653	0.872961	1.32502	1.74424	0.286635	3.19548	2.24242	4.57231	1.89107
Chmp2a	1.7353	1.66602	1.435	1.69011	2.0443	1.64691	1.7352	1.45946	1.52944	1.33835
Cope	1.73466	1.34987	1.09488	1.30786	1.53838	1.98941	1.42982	1.71082	2.24859	1.80498
Gdpd1	1.7339	1.23576	0.924804	1.25442	1.74326	0.29109	1.69224	2.59357	1.84639	1.38585
Drap1	1.73021	1.92308	2.06424	1.85736	1.64884	1.6138	1.54131	1.40463	2.02561	2.13031
Cplx2	1.7285	0.401147	0.29596	0.522426	2.88455	0.170126	0.581068	0.36432	0.219638	0.533185
Scoc	1.72658	0.973683	0.84474	1.11382	2.0137	0.772627	1.85645	1.69064	1.44497	1.86327
4833439L19Rik	1.72418	1.63543	1.75522	1.9287	1.64839	0.63605	1.53438	1.4575	1.15854	1.7918
Ptprs	1.7231	1.43994	1.43322	1.95419	1.76627	1.39418	1.6455	1.91885	1.31087	1.98576
Pou6f2	1.72236	0.0413569	0.114426	0.337839	2.14742	0.136148	0.108804	0.0575658	1.94682	0.232611
Srp9	1.72171	1.36708	1.18545	1.79858	1.82123	2.05405	1.69686	1.60937	1.54814	1.87574
Thoc7	1.71879	1.28936	1.25402	1.44574	1.56723	1.42938	1.44689	1.32608	1.53561	1.68118
Gria2	1.7179	0.769799	0.694754	1.71546	0.937638	0.304496	1.8414	2.49919	2.89305	4.05536
Enah	1.71442	1.44395	1.77728	1.74821	1.78257	0.764683	1.71932	1.61818	1.78705	1.98424
Ncan	1.71283	2.28174	2.35205	1.93056	1.35607	0.305153	2.34833	2.77545	1.65858	1.47742
Ppm1g	1.71255	1.43204	1.24785	1.60725	1.44927	0.959116	1.91302	1.86864	2.02352	1.53562
Smarcd1	1.71216	1.06368	1.14006	1.04613	1.65573	0.725792	1.80354	1.97706	1.3699	1.75633
Ccl27a	1.70967	1.65327	1.49697	1.50558	1.8211	0.265846	1.75291	1.67622	1.59321	1.57568
Cbx5	1.70912	1.61329	1.71	1.82663	1.55665	1.63709	1.84302	1.91862	1.91667	1.56133
Ctsb	1.70332	0.874995	0.667938	0.771902	1.20625	3.21813	0.837833	0.821278	1.08207	1.08086
Pkia	1.70119	1.2204	1.54916	1.10853	1.61534	0.254119	2.40801	2.0992	2.16035	1.86633
Pfdn6	1.69926	1.72457	1.73403	1.78196	1.6013	1.27461	1.50619	1.46423	1.52257	1.8619
Mpnd	1.69856	1.81579	1.39454	1.80479	1.91738	1.25962	2.33965	2.52122	2.55993	1.69188
Tmed9	1.69719	1.46849	0.964768	0.957029	1.5386	2.67972	1.63763	1.90686	1.37554	1.98267
Nudc	1.69681	1.68299	1.22589	2.08137	1.74896	1.81756	1.80295	1.70444	1.82744	1.27462
2900011O08Rik	1.69627	1.24577	1.75053	1.12618	1.47469	0.142741	1.92088	1.92475	2.25413	2.2047
Gabarapl1	1.6949	2.02358	2.64711	1.99252	2.29352	0.741812	1.67582	1.59764	1.90575	2.10357
Dnajc8	1.6937	1.37307	1.05999	1.46298	1.60284	1.21118	1.69372	1.72093	1.46963	1.78274
Atp1a3	1.69304	1.2383	1.66679	1.31038	1.69664	0.251551	1.26775	1.09791	1.87857	1.45636
Mast4	1.69301	0.0874347	0.0775077	0.150273	0.54418	0.561167	0.127493	0.323922	0.61562	0.136985
Atrx	1.69271	1.1173	1.08489	1.85405	1.70889	1.00874	1.80146	1.77456	2.07459	1.47699
Dpysl5	1.69219	1.82029	1.85503	1.26236	1.81411	0.340127	2.00461	1.76702	1.81093	2.25623
Luc7l2	1.69106	1.63743	1.31461	2.26778	1.7856	1.69802	2.12613	1.829	2.02245	2.01349
Arpp19	1.68723	2.26174	2.06166	2.19719	1.65563	2.19769	1.79778	1.74711	1.10202	1.86451
Hnrnpf	1.68544	2.32191	1.28623	2.20879	1.74899	4.3402	1.86078	1.97874	2.43528	2.02964
1110001J03Rik	1.68421	1.36837	1.39664	0.985734	1.78246	0.732303	1.25484	1.05616	1.52847	1.83068
Smim10l1	1.68266	1.30017	1.63757	1.48104	1.59967	1.38989	1.88562	1.36863	2.2085	1.39469
Sept3	1.68233	1.4878	1.70789	1.55017	1.5839	0.314407	1.6487	1.73681	1.18986	1.50251
Trim2	1.68186	1.4808	1.48826	1.50673	2.03071	0.353924	1.44943	1.97471	2.00772	1.86419
mt-Nd5	1.68127	1.62188	1.84438	1.61363	1.50008	2.47438	1.65906	1.64366	1.49933	1.68292
Gars	1.67887	1.84205	1.38902	1.25831	1.38115	0.861884	1.54241	1.77549	1.51598	1.2471
Scg3	1.67746	1.39685	1.15311	1.09775	1.69988	0.153503	1.36348	1.85835	1.45634	2.00302
Lsamp	1.67626	0.610081	0.899709	0.580731	1.13661	0.256098	4.73753	2.71381	0.738945	3.97679
Tdg	1.67347	1.7101	1.12687	1.89238	1.53617	0.604117	1.68994	2.05487	1.52221	1.76446
Ankrd12	1.67098	1.21022	1.24609	1.15348	1.32973	0.675773	1.6753	1.68916	2.44819	2.33894
2410015M20Rik	1.66941	1.68153	1.82324	2.12028	1.64724	2.38582	1.52231	1.23242	2.20662	1.34812
Rab5a	1.66929	1.32751	1.25808	1.82803	1.96834	0.978919	1.53194	1.70243	1.13126	1.32346
Tcaf1	1.66879	1.31823	1.62932	1.59156	1.75844	0.987454	2.01567	2.12232	1.9785	1.60066
Mea1	1.66854	1.94099	2.0319	1.60761	1.71082	1.27503	1.56192	1.3782	1.72813	1.48751
Npc2	1.66736	1.90617	1.77019	1.75608	1.47713	3.97302	1.42293	1.32951	1.43919	1.55212
Rap1b	1.66689	1.31492	1.255	1.40206	3.26486	1.70765	1.11586	1.06984	1.83436	3.01029
Sdcbp	1.66489	1.25074	0.963576	2.43499	2.33628	1.32889	1.64864	1.84453	1.31316	0.988912
Rcan2	1.66329	1.34746	1.66318	1.12053	1.9583	0.700693	1.26066	1.35306	1.20749	1.00185
Sept6	1.66261	1.80529	1.41005	0.731702	1.39658	0.613317	1.24661	1.46374	1.42469	1.39897
Ubxn6	1.66197	1.37944	1.37421	1.38029	1.75961	0.849484	1.50006	1.39065	1.49633	1.93449
Tmem130	1.66126	0.544665	0.662334	1.19923	1.64581	0.172225	1.1535	1.27074	1.85365	0.685203
Clstn1	1.66059	1.03695	1.4517	0.969315	2.26457	0.594671	1.08158	1.32097	0.954874	1.50947
Vps72	1.66031	1.59716	1.11394	1.92674	1.48761	0.992535	1.97489	2.04635	1.98197	1.69077
Gm16286	1.65896	1.75731	1.66822	1.641	1.63206	0.915233	1.76617	1.81098	1.20586	1.78569
Gpm6b	1.65873	0.994765	0.884165	0.877954	1.99736	0.572364	1.11768	1.40241	0.610846	1.41296
Snx3	1.65662	0.937555	0.970509	1.00504	1.81222	2.48328	1.41132	1.52577	1.72538	1.37484
Emc6	1.65243	1.84101	1.57931	1.62746	1.47565	0.772283	1.73693	1.37249	1.55538	1.42601
Sh3bp1	1.65129	1.11136	1.18114	1.43825	1.80871	0.554243	1.86428	1.70265	1.61144	1.54284
Mrpl12	1.65083	1.96856	1.90906	1.46156	1.48512	1.10796	1.69991	1.44132	1.43019	1.70362
Tppp3	1.64846	1.96486	1.70941	1.10559	3.9882	0.488904	0.403066	0.234888	0.468196	0.243641
Pcmt1	1.64734	1.87243	1.43835	1.48749	1.71684	1.04553	1.18495	1.33018	1.43048	1.10626
Tm2d2	1.64347	1.91636	1.6141	1.89774	1.67858	1.38908	2.05203	1.80832	1.46775	1.6695
Rwdd1	1.64254	2.09863	1.76516	1.47473	1.64625	1.75179	1.5645	1.40315	1.05879	1.65682
Tspan6	1.64151	1.35827	1.11493	1.22308	1.20543	1.81529	1.79067	2.25607	1.54005	2.27444
Snrpc	1.64113	2.01481	1.51644	1.98407	1.6465	1.84207	1.69645	1.90438	1.92285	1.59117
Irf2bpl	1.63975	1.03202	0.650101	2.25022	1.879	0.456601	1.94115	2.1759	1.58132	1.80703
Tbpl1	1.63947	1.32768	1.36468	2.25897	1.77157	0.881397	1.70004	1.56721	1.6919	1.89633
Tmem147	1.63897	1.87344	1.69474	1.46011	1.55023	1.70101	1.59601	1.40607	1.37478	1.41362
Lsm4	1.63827	2.0184	1.67885	1.85455	1.77642	1.77358	2.03973	1.70671	1.88706	1.3921
Chl1	1.63763	0.112694	0.304921	0.415851	0.242133	0.180259	1.5661	2.5747	2.27551	2.33853
Cnih1	1.63616	1.86253	1.86539	1.64777	1.69153	2.07306	1.36383	1.44051	1.49002	1.29282
Zfos1	1.63293	1.89548	2.84944	2.51704	1.73078	2.6499	2.61897	2.57299	1.84792	2.45943
Cbx1	1.63264	1.22141	0.829037	1.60945	1.56974	1.39143	1.93261	1.88303	1.66269	1.63817
Ndufs7	1.63227	1.55265	1.31859	1.79097	1.62914	1.79048	1.55616	1.51851	1.69431	1.51907
Map7d1	1.62981	1.72533	1.38994	1.50206	1.43593	0.835808	1.62647	1.72311	1.81328	1.81835
Elavl2	1.62802	0.539556	0.636352	1.37459	1.48851	0.222634	2.20497	4.00488	2.78826	4.69355
Snrpa	1.62437	1.48644	1.05064	1.54556	1.35049	1.47647	1.84081	2.00644	1.54978	1.56722
Ube2l3	1.62118	1.82564	1.51556	1.7264	1.57784	1.52037	1.57953	1.56895	1.47486	1.502
Socs2	1.62078	0.835022	0.535824	0.916953	0.874761	0.195265	0.238216	0.469545	0.506043	0.960255
Clmp	1.61917	0.508004	0.665442	0.710135	1.40009	1.73881	2.05542	0.791884	2.24025	1.72126
Trmt112	1.61806	1.52162	1.3396	2.01421	1.72098	1.80141	1.53107	1.55177	1.85145	1.7325
Cox14	1.61565	1.38955	1.64526	1.49693	1.64849	1.27782	1.48545	1.4253	2.29141	1.65106
Sh3glb1	1.61529	2.00566	2.30763	1.96792	1.72821	1.41752	1.53782	1.07116	2.33764	1.32014
Ndufs3	1.61477	1.64607	1.36289	1.63762	1.55987	1.73096	1.75006	1.71516	2.07636	1.71285
Lamtor2	1.61279	1.55207	1.61689	1.72031	1.33117	2.11816	1.59042	1.52086	1.68563	1.41685
Mzt1	1.61275	2.0946	1.81739	1.8321	1.80908	0.530919	1.85397	1.76624	1.19817	1.21989
Cwc15	1.61146	1.77761	1.53925	1.86058	1.68786	1.61432	1.62301	1.94692	2.05286	1.96399
Eif4h	1.6103	1.87611	1.60289	2.145	1.8231	1.96207	1.86983	1.89894	1.85126	1.67782
Abhd8	1.60969	1.26633	1.52141	1.49364	1.61254	0.857028	1.67094	1.64305	1.03079	1.74711
Eif3m	1.60919	1.47509	1.52142	1.51466	1.59535	2.31239	1.41398	1.6974	1.2199	1.45594
Mrpl23	1.60825	1.77135	1.56998	1.40847	1.4908	1.4893	1.86186	1.34242	1.25025	1.62334
Tax1bp3	1.60669	1.6008	1.36122	1.63976	1.90668	1.83445	1.8998	1.69541	1.4439	1.70454
Arxes1	1.60303	1.65892	1.39934	1.09431	1.17377	0.620265	1.68541	1.85441	1.74029	1.51028
Eif3d	1.59956	1.47413	0.98965	1.38871	1.20319	1.16994	1.27697	1.42294	1.62834	1.10595
Celf5	1.59952	1.35727	1.48784	1.75313	1.93368	0.256224	1.89362	2.16854	2.02971	1.74665
Polr2k	1.59919	1.59379	1.49444	2.20396	1.68056	1.29199	1.74625	1.60505	1.41261	1.4289
Tra2a	1.59841	1.38145	1.19728	1.57671	1.43382	1.23542	1.76935	1.71167	1.5611	1.40816
Txnl1	1.59809	1.68167	1.20428	1.54784	1.66597	1.99065	1.68079	1.76506	2.02123	1.16175
Wsb1	1.59646	1.64335	1.29111	1.7421	1.63576	1.20901	2.02909	1.86122	2.41741	1.92076
Syt1	1.59512	0.907372	1.76661	2.05876	1.57715	0.144521	0.757152	1.13124	0.683502	1.69423
Ube2k	1.59497	1.5407	1.31513	1.63308	1.57831	1.29285	2.08956	1.83736	1.83522	1.46911
Shank1	1.59439	0.943127	1.19531	1.24033	1.32714	0.192305	1.88442	2.0697	2.07858	1.38605
Nudt21	1.59424	1.85964	1.38387	1.78716	1.68104	2.07543	1.62836	1.85633	1.74596	1.74033
Mrps33	1.59226	1.54965	1.49446	1.8134	1.71108	1.6691	1.43948	1.54272	1.81799	1.66431
Polr3k	1.59137	1.72771	1.8184	1.42992	1.60104	0.804774	1.72657	1.49651	1.72982	2.20547
Cmip	1.59077	1.92178	2.29913	2.23302	1.61184	0.787649	2.42719	2.00798	1.90737	1.40538
Smim7	1.59047	1.38084	1.27944	1.29886	1.63481	1.41645	1.67584	1.42093	1.20829	1.71571
Acly	1.58984	1.84666	1.51344	1.35722	1.5995	0.500115	1.66709	1.71084	1.45213	1.69883
Scamp1	1.58888	0.932541	0.915786	1.17112	1.44626	0.317231	1.31922	1.37384	1.60917	1.64495
Klhdc8b	1.5876	2.18039	1.5851	3.42502	2.22594	0.624323	1.64051	1.57855	1.22228	0.219929
Atp6v1b2	1.58669	1.21989	1.01782	1.19735	1.33558	0.664496	1.42097	1.79169	1.87824	1.82023
Pmvk	1.58642	2.12547	1.83431	1.34636	1.83136	0.692017	1.17244	1.22732	1.66707	1.38154
Zfp207	1.58195	1.56772	1.0972	2.01777	1.41127	1.44949	1.93156	2.11308	1.80447	1.20696
Slirp	1.58123	1.58824	1.74126	1.68114	1.61076	1.29389	1.356	1.62589	1.34068	1.54675
Sfxn1	1.58056	2.03132	1.8528	1.35469	1.44102	0.45703	1.58042	1.78874	1.41215	1.29599
Acp1	1.57864	1.56436	1.32456	1.79716	1.32893	1.29317	1.48589	1.61711	3.73589	1.51691
Apba2	1.57845	1.21783	1.049	1.21031	2.25205	0.206948	1.23376	1.17597	1.08134	1.49981
Ppp1r11	1.57328	1.48067	1.37449	1.45661	1.43742	0.808753	1.37438	1.51396	1.77736	1.79381
Gdap1l1	1.57161	1.55683	1.7659	1.56847	1.53317	0.239894	1.76909	2.0078	2.06263	1.70317
Mcts1	1.57079	1.3339	1.38491	1.25845	1.25765	0.802906	1.44786	1.8517	1.31727	1.53526
Npepps	1.5702	1.46765	1.31453	1.70177	1.50377	0.636094	1.59388	1.92582	1.71538	1.20277
Tmem256	1.56988	2.15582	1.86703	1.44436	1.98769	2.7836	1.80612	1.50294	1.44847	2.24829
Fam49b	1.56648	2.29321	2.05141	1.75161	1.75399	0.700122	1.30719	1.80781	1.74591	1.59631
Chst2	1.56645	0.180659	0.0931689	0.207199	2.82445	0.399851	0.1325	0.0662502	0.390446	0.44723
Atp6v0e2	1.56447	1.26705	1.53262	1.26229	1.83445	0.341097	1.49835	1.61091	1.98338	1.29756
Rnf11	1.55918	1.67928	1.63852	2.16573	1.86877	0.775853	1.75212	1.36155	2.17963	1.64764
Arpc4	1.558	1.76775	1.70781	1.29745	1.48611	1.06971	1.54919	1.37107	1.20458	1.33103
Capns1	1.55186	2.44229	1.98804	1.73043	1.80268	3.00875	1.33127	1.22829	2.02542	1.22678
Hsp90b1	1.55089	1.6974	0.92732	1.13893	1.34701	3.52097	1.44514	1.74917	1.49378	0.953328
Cbarp	1.55025	1.72932	1.59373	1.8294	1.42931	0.298117	1.68029	2.11124	2.13828	2.09956
Kif21a	1.54697	0.911873	0.906515	0.914444	2.2587	0.203824	1.34768	1.15794	1.04353	1.14793
Ubxn1	1.54666	1.85008	1.63498	2.14221	1.8096	1.6533	1.43834	1.55566	1.5824	1.65377
Phf5a	1.54531	1.48334	1.41766	1.68473	1.50546	1.42385	1.57122	1.81243	1.83148	1.54218
Tubb4b	1.54133	1.58198	0.897802	1.12142	1.36816	2.61496	1.47784	1.28786	1.72148	1.21087
Ptges3	1.53948	1.76549	1.60816	1.60204	1.71293	1.3841	1.59283	1.49574	1.88414	1.41228
2210013O21Rik	1.53945	1.1196	1.97867	1.57244	1.66067	1.17658	1.14957	1.3969	1.39698	1.11696
Rbm18	1.5389	1.13713	0.952434	1.21631	1.3996	0.647724	1.55725	1.57891	1.64265	1.80675
Aco2	1.53878	1.3884	1.01171	1.40691	1.67891	1.39518	1.36819	1.6019	1.35357	1.89905
Dcun1d5	1.53764	1.73994	1.61195	1.94096	1.55023	2.1412	1.55966	1.41424	1.40402	1.43383
Tpgs2	1.5372	1.54676	1.38571	1.4515	1.53699	0.799151	1.44464	1.53288	1.70339	1.77809
Grcc10	1.53461	1.00158	1.09161	1.39431	1.75755	0.859757	1.52954	1.31601	1.35484	1.23584
Eif5b	1.53153	1.58792	1.22647	1.61107	1.43409	1.9516	1.57629	1.65717	2.03017	1.80049
Midn	1.53073	1.65024	1.28987	1.80905	1.45091	0.961558	1.69842	2.10902	1.24711	1.65722
Chchd1	1.52664	2.03819	2.05388	1.58693	1.62307	1.07767	1.69194	1.37703	1.44617	1.42865
Maz	1.52574	1.32846	1.73398	1.34618	1.78487	0.914871	1.7227	1.57431	1.20313	0.943999
Traf4	1.52476	2.0442	1.51289	2.16113	1.65961	0.940562	2.12836	2.00428	1.49123	2.05907
Deaf1	1.52381	1.40999	2.01035	1.37711	1.20786	0.781757	1.86691	1.65111	1.51068	1.23935
Tulp4	1.52086	1.33975	1.49993	1.68615	1.52355	0.536289	1.71555	1.73807	1.46503	1.7479
Srp54b	1.51908	1.40176	1.05447	1.18183	1.35836	1.42675	1.38679	1.71087	1.54638	1.11238
Nucks1	1.51899	1.26407	1.22724	1.26276	1.48412	1.8562	1.61562	1.48212	0.922793	1.74085
Slc25a11	1.51634	1.56852	1.34306	1.66284	1.58713	1.38456	1.22759	1.57219	1.90682	1.08902
Ip6k2	1.51617	1.2244	0.916717	1.47481	1.63635	0.844949	2.08506	2.23403	1.63308	1.45995
Dpy30	1.51475	1.30696	1.15888	1.36256	1.37179	0.924749	1.3907	1.38682	1.20346	1.87503
Sh3bp5	1.51434	1.0229	1.10026	0.846791	1.02201	0.64793	1.97769	1.85114	1.48887	1.77501
Fam96b	1.51422	1.94994	1.89642	2.23772	1.61075	0.839544	1.33208	1.34626	1.22031	0.988513
Snap25	1.51383	1.61153	1.63784	2.0426	1.724	0.185039	1.12127	1.09149	1.90255	1.23686
Ppp4c	1.51213	1.68987	1.39882	1.87095	1.66822	1.86953	1.36857	1.53548	1.7489	1.27059
Rbm8a	1.51173	1.62388	1.15614	1.88493	1.6142	1.38839	1.38696	1.38703	1.55623	1.37091
Mrpl42	1.50822	1.62606	1.57407	1.29345	1.34048	1.66668	1.10505	1.34872	1.5844	1.10716
Bud31	1.50782	1.47109	1.42293	1.4983	1.6071	1.04448	1.51007	1.55659	1.11462	1.94133
Myef2	1.5074	1.64688	1.48924	1.98336	1.7811	1.0005	1.89943	1.65406	2.19681	2.00082
Bpgm	1.50643	1.0859	0.975619	1.16803	1.3561	0.34292	1.16019	1.45625	1.0251	1.7507
Cyp51	1.50557	1.80107	1.18462	0.899117	1.36256	0.427065	1.16648	1.25675	1.9168	1.26669
Tmem132a	1.50253	0.945614	0.852022	1.0335	2.12405	0.607754	1.69507	1.63842	1.54344	1.8727
Eif3g	1.50063	1.51997	1.3151	1.26841	1.26801	1.59639	1.40946	1.64929	1.47076	1.7605
Ube2r2	1.50014	1.39809	1.48115	1.79528	1.45662	1.63924	1.55985	1.41458	1.60378	0.992421
Mtx2	1.4989	1.25971	0.86121	1.17654	1.40146	1.22592	1.31234	1.86452	1.50615	1.16111
Polr2i	1.49809	1.44299	1.45232	1.6484	1.50075	1.18776	1.53468	1.26808	0.883824	1.62246
Atp6ap1	1.49769	1.15419	0.846477	0.755064	1.33515	1.0902	1.32743	1.66685	1.38877	1.71174
Got2	1.49751	1.45533	1.30527	1.1783	1.24634	1.25408	1.1654	1.32938	1.35112	1.49699
Ostc	1.49248	1.96443	1.34494	1.55564	1.55878	3.54451	1.23664	1.74584	1.41983	1.49319
Zic4	1.49018	0.123405	0.0508856	0.159303	2.32165	1.88774	0.0507949	0.0859826	0.0366527	0.0943655
Auts2	1.49011	0.92824	0.808966	1.3883	1.81831	1.31612	1.69534	1.75575	1.74905	2.53376
Psmd13	1.48989	1.40133	0.845029	1.31049	1.43276	1.22347	1.16746	1.39243	1.56467	1.22085
Txndc9	1.48935	1.37411	0.978777	1.33951	1.33192	1.62708	1.60671	1.64059	1.15297	1.30236
Efnb3	1.48711	0.932432	0.833417	1.9653	1.45919	0.760953	1.85207	2.00218	1.79507	1.22305
Eif3a	1.48618	1.91188	1.59284	2.03153	1.41061	1.41737	1.75698	1.62961	2.27728	1.50351
Rhoa	1.48522	1.61334	1.22672	1.72439	1.65171	3.29031	1.37056	1.28776	1.6381	1.0522
Znrf1	1.48447	1.62612	1.4963	1.93478	1.66931	0.507416	1.83684	2.0689	2.16843	1.61212
Prr13	1.48404	1.53045	2.4797	1.15984	1.52364	0.994115	1.2181	1.24165	1.33401	0.918536
Sfr1	1.48352	1.59595	1.14975	1.75358	1.52359	2.88232	1.13624	1.16899	1.15195	1.13668
Smap1	1.47883	1.31821	1.36062	2.01166	1.61841	1.29814	1.32354	1.25383	1.15333	1.401
Sptbn1	1.4787	1.48676	2.00877	1.14928	1.53786	3.06181	1.30562	1.1806	1.59725	1.61037
Brd2	1.47853	1.63915	1.56711	2.00858	1.54959	1.48332	1.65004	1.64405	1.51438	1.59231
Napa	1.47776	1.69676	1.4769	1.52441	1.38574	1.64021	1.44631	1.26625	1.41502	1.45066
Strbp	1.47739	1.66265	1.50832	1.63868	1.98949	0.647242	1.78746	1.45877	1.97251	1.27387
Fam134a	1.47648	1.20331	1.21673	1.45774	1.48554	0.611593	1.59586	1.69208	1.78032	1.18411
Rbmx	1.46917	1.50072	1.0459	1.52196	1.76711	0.708238	1.70125	2.0076	1.32824	1.93774
Ppp1r2	1.46855	1.34809	1.2511	1.51973	1.60326	1.52403	1.12478	1.38589	1.05451	0.99326
Atp6ap2	1.46809	0.976276	0.807537	0.778526	1.08209	0.680778	1.3123	1.60601	2.02364	1.32921
Cox19	1.46667	1.48273	1.56853	1.50692	1.73861	0.860834	1.92764	1.70178	1.42919	1.47006
Eif3c	1.46577	1.61691	1.24358	1.45558	1.58171	1.67341	1.85167	1.80855	1.67597	1.99679
Aurkaip1	1.46463	1.37761	1.40562	1.43891	1.51719	1.49215	1.42373	1.58708	1.51578	1.40167
Fam220a	1.46341	1.19908	1.22046	1.25218	1.46393	0.594518	1.56141	1.27126	1.76107	1.49701
Hspa5	1.46072	1.73361	0.798976	1.52215	1.29128	3.45724	1.52892	1.81782	1.13931	1.97032
Maea	1.46	1.1134	1.03591	1.25069	1.60017	0.984051	1.43537	1.42915	1.52957	0.929679
Prrc2b	1.45974	1.23348	1.61627	1.5582	1.27013	0.781329	1.38707	1.7109	1.22365	2.00286
Anp32a	1.4597	2.28405	1.51747	1.45585	1.25414	3.0087	0.809314	1.48879	0.821996	1.00209
Stxbp1	1.45848	1.48429	1.75393	1.26566	1.63263	0.437236	1.41432	1.78249	1.38264	1.10427
Zmat2	1.458	1.54662	1.38092	1.37521	1.38981	1.39462	1.59439	1.71818	1.46353	1.4446
Rer1	1.45576	1.73083	1.3845	1.36275	1.38324	2.52241	1.20806	1.54856	1.19698	1.13821
Btbd1	1.45512	1.58242	1.36731	1.81652	1.59943	1.11233	1.38687	1.76969	1.45206	1.4745
Arl1	1.45368	1.15372	1.07648	1.2819	1.41535	2.05562	1.39938	1.2059	1.7989	1.04323
Tspyl4	1.4532	1.24076	1.64111	1.46528	1.65379	0.380578	1.56376	1.33455	1.64291	0.736156
Ptp4a2	1.45307	1.77156	1.84005	1.65655	1.54065	1.19687	1.71487	1.54788	1.01349	1.34144
Top2b	1.45118	1.19287	1.15875	1.68678	1.50809	0.816323	1.92704	2.10547	1.47792	1.72665
Timm17b	1.44665	1.38022	1.28318	1.43997	1.51296	1.37579	1.3222	1.28009	1.45848	1.51658
Oxct1	1.44637	1.4455	1.372	0.843511	1.35427	1.38921	1.23113	1.29082	1.65732	1.46487
Limd2	1.44582	1.81001	1.64003	2.02935	1.77509	3.09556	1.48543	1.24085	1.5153	1.44426
Pdrg1	1.44444	1.16677	0.981734	1.0511	1.47198	0.877883	1.35757	1.4094	1.49903	1.93206
Mrps24	1.44403	1.74213	1.87978	1.35071	1.44954	1.74195	1.22646	1.10878	1.42949	1.30464
Nsfl1c	1.44337	1.36153	0.860694	1.342	1.31543	0.979384	1.49436	1.70199	1.30305	1.35479
Serinc3	1.44279	0.765796	0.540613	0.76262	1.20739	1.84343	0.670329	0.859198	0.925779	0.505787
Mapk3	1.44258	2.72361	3.11838	1.10562	1.28554	1.01773	1.3112	1.13618	1.12735	0.970067
Ppp3ca	1.44256	2.09793	1.9821	1.69794	1.51612	0.876367	2.91979	2.77186	4.60602	2.71355
Ap1m1	1.44174	1.00782	0.805758	1.12314	1.369	0.796695	1.21721	1.42222	1.38017	1.72203
Mapre2	1.44133	1.53144	1.56446	1.30592	1.44858	0.584025	1.81027	1.56563	1.14169	1.43447
Dync1li1	1.43829	1.50191	1.25116	1.34549	1.56623	0.559582	1.35017	1.19752	1.15379	1.27343
Wbp1	1.43659	1.17922	1.01451	2.00655	1.60316	1.23286	2.16957	2.13765	1.4252	1.99236
Itpa	1.43421	1.13146	0.725064	0.992189	1.25143	0.951086	1.33646	1.3109	1.09395	1.41566
Gde1	1.43373	1.28708	1.13691	1.46399	1.26929	1.28737	1.66101	1.53772	1.28828	1.54401
Ube2j2	1.43065	1.50747	1.47739	1.80246	1.40392	1.11164	1.44999	1.30811	1.78447	1.55906
Bag6	1.43031	1.69101	1.3485	2.13376	1.53518	1.16915	2.13479	2.37007	2.1756	1.65958
Fam32a	1.43002	1.71815	1.72828	1.74532	1.688	0.88443	1.77521	2.22268	2.0534	2.16982
Adh5	1.42959	1.25942	0.79816	1.0724	1.13271	1.33901	1.4405	1.57755	1.35597	1.16294
Tsnax	1.42938	0.954407	1.32163	1.44896	1.0456	0.941774	1.80896	1.79746	2.96188	1.85988
Acin1	1.42743	1.34252	1.06746	2.03276	1.34268	1.14989	1.75009	2.13284	1.51015	1.56131
Ppa1	1.4258	1.46053	0.878191	0.954675	1.13106	0.571296	1.17092	1.38894	1.27373	1.34325
Map6	1.42424	1.23035	1.60027	1.56649	1.72154	0.367606	1.30854	1.38054	1.43078	1.84333
Ubxn4	1.42298	1.49397	1.15077	1.66437	1.38023	1.01671	1.40771	1.57857	1.47884	1.60044
Sdc3	1.42197	0.691179	1.25527	0.642785	1.26873	0.358573	0.997492	0.995663	1.86846	1.52515
Vti1b	1.42057	1.52759	1.39194	1.13458	1.26532	0.812882	1.35618	1.14067	1.54859	1.97179
Rab5c	1.41917	1.20211	1.22417	1.0875	1.38129	1.27995	1.27801	1.02853	1.34229	1.34716
Eri3	1.41914	1.42593	1.51255	1.71667	1.36049	1.55564	1.57566	1.39055	1.93745	1.15347
Mrpl18	1.41684	1.00853	1.02714	1.17273	1.14722	1.16809	1.3764	1.49281	1.06697	1.35995
Shd	1.41633	0.920387	0.912663	1.13037	1.31317	0.344189	1.67792	1.80747	1.18927	1.11609
Anapc13	1.41321	1.15022	1.13071	1.64673	1.52501	1.88645	1.26302	1.11375	1.1985	1.34411
Dbnl	1.41292	1.38275	1.00629	1.17747	1.24477	0.948282	1.07014	1.23933	1.25139	1.2646
Gps1	1.41241	1.17581	0.880217	1.13398	1.08776	1.44709	1.46775	1.83037	1.89094	1.48148
Ost4	1.41211	0.972332	1.00257	0.942683	1.51983	3.58023	1.09297	0.968913	1.00841	0.837543
Eif3l	1.41202	1.50449	1.56023	1.27816	1.35804	1.94142	1.21988	1.43812	1.16602	1.44549
Pomc	1.41117	19.8599	22.2856	19.8037	1.1765	0.93334	2.35348	1.96622	2.88484	1.10927
Praf2	1.41074	1.12263	1.25412	0.704785	1.53465	1.12839	0.931308	1.22566	1.35552	1.08189
Nipsnap1	1.41022	1.49562	1.32928	0.995287	1.22663	0.274122	1.56757	1.6684	1.69084	1.39293
Ccdc184	1.40989	0.918963	1.04696	1.34428	1.64147	0.14012	1.48451	1.3146	1.34408	1.12398
Mapk10	1.40925	0.595413	0.467168	0.881183	0.939097	0.0890128	0.840977	0.85439	0.921214	0.958365
Prkar2a	1.40834	1.39981	1.69042	1.70967	1.81404	0.545403	1.30847	0.940888	1.71727	1.17388
Blmh	1.40812	1.23594	1.03273	1.09212	1.24128	1.3097	1.19815	1.44307	1.64328	0.967682
Smc3	1.40646	1.04895	0.668622	1.30577	1.4696	1.145	1.23136	1.75498	1.07233	1.11518
Gprasp1	1.40421	1.27444	1.47671	1.89753	1.38185	0.563255	1.46747	1.38639	1.83785	1.58688
Ncs1	1.40356	1.49444	1.5964	1.06622	1.69912	0.496555	1.58694	1.94615	1.60858	2.10141
Sod2	1.40348	1.60243	1.43557	1.25384	1.46286	0.856552	1.02698	0.990903	0.626172	1.1746
Zfp580	1.40253	1.11601	1.46666	1.11229	1.66454	0.91039	1.13709	1.12478	1.17241	1.4408
Prkar2b	1.40137	1.14809	1.42223	1.00534	1.20035	0.19437	0.99787	1.1624	0.872818	1.27631
Lbh	1.40054	1.36376	1.40166	1.13137	2.0446	0.363017	0.940209	1.12996	1.50183	1.75588
Psmd14	1.39964	1.63475	1.10299	1.34693	1.31041	0.964251	1.3898	1.92974	1.45781	1.54992
Snf8	1.39838	1.28916	1.46115	1.21327	1.53761	1.16988	1.16449	1.49459	1.19316	1.29462
C1qbp	1.39813	1.92097	1.6938	1.41334	1.31056	1.30423	1.46649	1.31506	1.43322	1.84148
H2afj	1.39792	1.3149	1.54604	0.859474	1.2271	1.42594	1.31926	1.51561	1.33025	1.46419
Ogt	1.39735	1.04977	0.970668	0.872278	1.16054	0.741027	1.3949	1.71483	1.33944	1.27169
Ssr2	1.39454	1.34524	0.953938	1.19158	1.41111	4.23643	1.03786	1.12563	1.20323	1.34567
Ctsd	1.39346	0.64816	0.489491	0.590559	0.789589	2.02778	0.800339	0.964642	0.824694	0.796625
Zc2hc1a	1.39161	1.46355	1.11199	0.960289	1.55831	0.554186	1.45876	1.6065	1.16411	1.74229
2810428I15Rik	1.39056	1.65152	1.51413	1.34255	1.46741	1.23489	1.44203	1.45609	1.58078	1.3947
Ccni	1.38988	1.16913	1.31105	1.6717	1.59556	1.34808	1.44351	1.30261	1.54841	1.44597
Cops5	1.38972	1.43376	1.01347	1.03779	1.28857	1.23488	0.988705	1.10865	0.933028	1.36021
Pkig	1.38837	0.413272	0.385142	1.1837	1.83564	0.871665	0.891056	0.884658	1.095	1.16638
Adrm1	1.38773	1.35024	0.939035	1.39525	1.2511	1.00392	1.56743	1.37227	1.24316	1.15968
Cltb	1.38669	1.11489	1.38446	0.793525	1.20022	0.471892	1.20208	1.25998	1.45318	1.32561
Ssbp4	1.3851	1.37686	1.6511	2.06885	1.83236	1.0318	0.983793	0.986548	1.70963	1.17962
Grb2	1.38476	1.38383	1.54619	1.38923	1.45053	0.71242	1.78612	1.54793	2.03408	1.71032
Ccdc28b	1.38371	0.870687	1.12548	1.19876	1.52129	0.996433	1.23377	1.27975	1.31772	1.13327
Cox20	1.38356	1.23821	1.19752	1.31118	1.46286	1.00146	1.35197	1.5659	1.18627	0.838888
Gng8	1.38277	0.0212171	0.0421335	0.0654065	5.55378	0.131072	0	0.0238089	0.0299212	0.06578
Tmx2	1.38245	0.93811	0.669457	0.974484	1.25432	0.653663	1.25217	1.33276	1.33624	1.25309
March5	1.38146	1.55733	1.27863	1.75915	1.30937	1.18698	1.99862	1.96625	1.42664	1.49288
Actr10	1.38078	1.21875	0.842152	1.18956	1.32482	0.85966	1.42789	1.63452	1.01341	1.26921
Fam216a	1.3805	1.07727	0.960893	1.85134	1.51733	0.60746	1.57539	1.64741	1.48807	1.21183
Kif5b	1.37823	1.42316	1.10905	1.83149	1.37533	1.47301	1.77164	1.32792	1.19754	1.09982
Hnrnpm	1.37786	1.3385	0.775625	1.33133	1.12914	1.47526	1.45671	1.75551	1.31351	1.4971
Eif6	1.37717	1.56134	1.26465	1.4085	1.26139	1.45748	1.22054	1.29039	1.3649	1.13886
Papola	1.3764	1.4437	1.16557	1.75356	1.55146	1.29611	1.69955	1.47154	1.50361	0.976479
Rbm17	1.37635	1.53745	1.3002	1.46248	1.33568	1.27396	1.43137	1.34324	1.88264	1.49064
Gnaq	1.37456	1.19821	1.44012	1.60824	1.31447	0.519843	1.78558	1.62627	1.90133	1.74967
Gltscr2	1.3745	1.2757	1.57139	1.68007	1.33292	1.65227	1.42855	1.80419	1.46205	1.4505
Srpk2	1.37376	1.17171	1.11626	1.15866	1.32964	0.743087	1.40147	1.49749	1.29092	1.48739
Med22	1.37309	1.19076	0.783075	1.38959	1.3083	0.374889	1.30752	1.37356	1.4497	1.11385
Bhlhb9	1.37107	1.53657	1.05812	1.91372	1.31832	0.873762	1.56688	1.81754	1.41998	1.52166
Elof1	1.37067	1.01487	1.04456	1.38712	1.46339	1.26011	1.45594	1.12219	1.12188	1.34229
Sar1b	1.36792	1.14063	0.722392	1.07385	1.14923	0.977231	0.826675	0.877602	1.22425	1.18722
Wdr83os	1.36776	1.40557	1.509	1.12298	1.26696	1.19779	1.04695	0.968914	1.45282	1.30084
Sarnp	1.36596	1.22738	0.901295	1.44357	1.33031	1.29481	1.25482	1.29272	1.33581	1.03771
Coro1c	1.35927	2.29893	1.69273	1.81163	1.65105	0.750958	1.44684	1.36764	1.52393	1.04546
Kif3a	1.35516	1.13	0.845938	0.868869	1.20733	0.521164	1.49861	1.63664	1.37181	1.44083
Cacng4	1.35446	0.76363	0.736451	0.962264	1.69945	0.201097	1.31208	1.26526	1.29523	1.66352
Psmc6	1.35437	1.41984	0.843157	1.25248	1.29939	1.16275	1.15905	1.61429	1.41699	1.09785
Chd4	1.35399	1.27091	1.23824	2.28006	1.57171	1.35793	1.88819	1.66634	1.5219	1.18829
Rps27l	1.3536	2.12538	1.93417	2.3446	1.46031	3.62505	1.01607	1.08023	1.09197	1.24446
Banf1	1.35303	1.34198	1.17844	1.1213	1.37395	1.23285	1.34659	1.14999	1.24539	1.19194
Snrnp70	1.35291	1.44319	1.01084	1.66029	1.22806	1.61217	1.62404	1.8689	1.45884	1.2498
Smarcc1	1.351	1.52563	1.33987	1.81821	1.18738	0.837715	1.56472	1.64642	1.51295	1.1986
Ankrd11	1.35082	1.5178	1.33103	1.66492	1.38411	1.06571	1.92629	1.52839	1.29988	1.14381
Mrpl43	1.35005	1.07501	1.08692	1.25977	1.36855	0.875451	1.45424	1.28996	1.41688	1.49677
Adgrl1	1.34935	0.997585	1.34287	1.1271	1.06952	0.599845	1.45083	1.2918	1.09011	1.44223
Rbmxl1	1.34741	1.24322	0.903716	1.55293	1.45223	1.20082	2.04916	2.08715	1.84394	1.46956
Csk	1.34634	1.20775	1.49205	1.07594	1.24158	0.814434	1.40534	1.30235	1.36188	1.4594
Arglu1	1.34517	1.22164	1.12233	1.47724	1.39296	1.08784	1.78111	2.15734	1.76011	1.2753
Tsc22d3	1.34509	0.919929	0.968057	1.13561	1.6379	0.387803	1.0368	1.76959	0.652217	0.674971
Scp2	1.34494	1.45002	1.16588	1.34663	1.24821	1.6092	1.13842	1.29159	0.871461	0.755563
Elmo1	1.3447	0.233555	0.406929	0.551172	1.20589	0.152113	1.53753	1.32512	2.40238	0.770366
Kidins220	1.34413	1.49422	1.96614	1.01531	1.28969	0.59267	1.3359	1.14194	1.25639	1.83448
Ndufs8	1.34331	1.04599	0.974217	0.980208	1.18259	1.60993	1.05478	1.02188	1.03777	1.20836
Inpp5f	1.34261	0.912934	1.16895	1.34217	1.32865	0.395261	1.81891	1.63977	1.57488	1.18681
Lsm6	1.34226	1.26612	1.12677	1.50755	1.50761	1.23164	1.58462	1.46645	1.35572	1.09354
Pdia6	1.3406	1.57573	0.660159	0.83741	1.14538	3.49531	1.23298	1.30727	0.927879	1.12089
Prkra	1.34059	1.31792	1.18768	1.15455	1.22652	0.928974	1.1866	1.50839	1.35931	1.06281
Sec23a	1.33991	1.24583	1.08571	0.985228	1.29259	0.584591	1.25963	1.09787	1.00814	1.15517
Zfp422	1.33888	1.30383	0.995811	1.40743	1.29289	1.13455	1.67159	1.56926	1.34967	1.60627
Smarcc2	1.33731	1.26649	1.16695	1.39699	1.24717	0.826036	1.73928	1.73029	1.65032	1.93307
Acat1	1.33671	1.7847	1.20764	1.2075	1.44034	1.43904	1.30105	1.42601	1.1704	1.64332
Nop56	1.33664	1.28833	0.881559	1.00319	0.978193	1.002	1.26825	1.42095	1.4161	1.00701
Zbtb20	1.33497	0.934036	0.712413	2.72025	1.25654	1.40363	1.85245	1.86862	1.91241	1.51492
Ntan1	1.33437	1.2468	1.42132	1.09402	1.27103	1.5016	1.37833	1.11951	0.979501	1.36507
Mrpl54	1.33388	1.23041	1.53849	1.4508	1.5449	1.23612	1.18422	0.765002	1.01884	1.21641
Ythdf2	1.33368	1.23456	0.949015	1.21038	1.24477	0.653367	1.74814	1.75612	1.11941	1.47462
Tmeff2	1.33227	1.37026	1.60694	1.15033	2.02182	0.130542	0.857169	1.37173	0.960981	1.86291
Uba2	1.3322	1.0677	0.623746	1.14912	1.16422	1.13671	1.50185	1.71309	0.942265	1.48538
Tram1l1	1.33198	1.04981	0.652426	0.852968	1.29018	0.514851	1.3628	1.42367	1.49934	0.758391
Ivns1abp	1.33113	1.5538	1.24436	1.59936	1.36457	0.553014	1.80598	2.02283	1.5978	1.67993
Cacfd1	1.33027	1.24557	1.29753	1.76318	1.23885	0.71133	1.49831	1.80174	1.36777	1.43052
Mrps17	1.32888	1.51054	1.4001	1.42181	1.20172	1.38503	1.42545	1.27952	1.27778	1.75682
Nt5c3	1.32841	1.37633	1.11293	1.11694	1.22978	0.434922	1.33715	1.35122	1.31871	1.45626
Gipc1	1.32747	1.48733	1.18177	1.35855	1.37194	1.67346	1.12672	1.35015	0.987634	0.869731
G3bp1	1.3274	1.92539	1.16948	1.77782	1.29449	2.08167	1.491	1.78533	1.34684	1.12707
Arl2	1.3266	1.40723	1.25945	1.19526	1.32367	0.912238	1.10273	1.04178	1.19784	1.30709
Zcchc18	1.32658	1.45012	1.23328	1.53198	1.25165	0.299518	1.58638	1.39011	2.79049	1.3295
Drg1	1.32608	1.29387	0.857944	1.44002	1.01119	0.803362	1.34962	1.5026	1.06597	1.1301
Smarca2	1.32608	1.24896	1.30651	1.36037	1.39519	0.982848	1.41199	1.73026	1.28319	1.75014
Mex3a	1.32155	1.3022	1.22248	1.618	1.46609	0.527118	1.9383	1.71326	1.27631	1.23558
Ckap4	1.32103	1.30423	1.15905	1.20999	1.37737	2.77393	1.27018	1.32708	1.30432	1.44483
Ehd1	1.31956	1.53218	1.34896	1.03927	1.42491	0.880195	1.37057	1.14187	1.41208	1.01977
Canx	1.31752	1.45436	1.43383	1.19184	1.13283	1.64299	1.14339	1.14926	0.945033	0.890326
Supt4a	1.31709	1.18545	1.17053	1.50078	1.59377	1.44026	1.58163	1.60576	1.31109	1.26371
Vangl2	1.31651	0.962689	0.698428	1.5331	0.89444	0.436755	1.30537	1.57682	1.14772	0.639165
Lin7a	1.31562	0.365289	0.89998	0.610464	0.751652	0.123448	0.55226	0.638613	0.59416	0.273096
Gpr85	1.31464	0.662997	0.771649	0.75584	1.61802	0.147588	1.57199	1.92204	1.21764	2.48198
Wac	1.31368	1.33728	1.09355	1.69195	1.31028	0.863785	1.5552	1.37372	1.40489	1.45889
Ssna1	1.31313	1.63449	1.54374	1.26551	1.40627	1.24263	1.31471	1.37998	1.35474	1.14768
Ict1	1.31173	1.26452	1.17268	1.13429	1.49036	1.0527	1.16465	1.20475	1.507	0.938462
Psmd2	1.31171	1.40848	0.830235	1.11695	1.36427	1.68829	1.51229	1.88139	1.60904	1.01391
Cxadr	1.30994	0.830212	0.966305	1.10948	1.43904	0.614646	2.14496	1.96837	1.30872	0.98017
Psmc3	1.30983	1.16594	0.749372	0.969895	1.19973	1.59184	1.19841	0.943386	1.12648	0.735237
Churc1	1.30969	1.28169	1.53624	1.44271	1.3448	1.24016	0.982977	1.10802	0.870522	1.07124
Tmbim6	1.30917	0.936795	0.723563	1.01785	1.19944	2.2498	0.904938	1.21162	1.44795	1.22786
Cask	1.30864	0.821687	1.12537	1.10293	1.11034	0.672409	1.48483	1.36034	1.16079	1.4535
Sdhc	1.30794	1.32171	0.990793	1.30345	1.2392	1.36588	1.2095	1.11864	1.22825	1.1242
Clns1a	1.30738	1.53793	1.0851	1.33107	1.28987	1.11292	1.25974	1.63333	1.17172	1.2376
Fnta	1.30609	1.14939	0.96519	1.08093	1.25719	1.15769	1.22127	1.14195	1.40674	1.42096
Akirin1	1.30485	1.17856	1.23154	1.42026	1.38481	0.704814	1.27526	1.23957	1.37271	1.48792
Clcn4	1.30159	0.865307	0.787277	0.911147	1.22609	0.695223	1.40015	1.5469	1.44837	1.11901
Egln2	1.30096	1.39584	1.29898	1.48663	1.50114	1.04251	1.38193	1.15365	1.26837	1.27248
Bend5	1.30053	1.53717	1.01031	1.412	1.07705	0.658278	1.13343	1.37267	0.758383	0.859375
Raf1	1.29933	0.860631	0.784436	0.977255	1.25479	0.785264	1.3917	1.76764	1.02811	1.28467
1500011B03Rik	1.29885	2.0857	1.71083	1.76394	1.71995	0.395485	1.31589	1.46002	0.981003	1.95054
Msi1	1.29881	1.09707	0.810299	1.65552	1.32343	0.250376	1.18996	1.14949	1.29919	1.07459
Ppig	1.29832	1.27438	1.11275	1.72045	1.30062	1.76784	1.5256	1.43999	1.41551	1.53737
Bub3	1.2982	1.17969	0.7909	1.30998	1.16636	1.33666	1.65647	1.79468	1.17255	1.76203
Kctd13	1.29818	1.60467	2.06059	1.17171	1.15958	0.318872	1.53544	1.51879	1.06708	1.1718
Psmc1	1.29599	1.39714	0.938267	1.21618	1.1317	1.10382	1.3112	1.43205	1.96999	1.14031
Amn1	1.29595	1.25031	1.17263	1.4763	1.32578	0.386037	1.38136	1.78234	1.12345	1.23344
Hba-a2	1.29518	1.21475	1.15833	1.39825	1.47607	1.33048	1.57352	1.75299	0.956116	1.12118
Arid1a	1.29514	1.25072	1.34157	1.69988	1.22449	1.05245	1.64287	1.44568	1.51257	1.18051
Ppp3r1	1.29351	1.26646	1.25427	1.46361	1.38228	0.5346	1.29458	1.35547	1.40744	1.19123
Arpc5l	1.29281	1.59267	1.5006	1.82702	1.52156	1.05827	1.10302	1.41846	1.20902	1.1366
Cnpy2	1.29168	1.28615	1.17301	1.82815	1.45061	3.21217	1.59109	1.39574	1.65729	1.54512
Polb	1.28929	1.02458	0.991181	1.1555	1.29141	0.418263	1.37417	1.56483	1.63682	1.43057
Bloc1s2	1.28441	1.51077	1.53732	1.43137	1.39182	0.606893	1.27024	1.52636	1.36675	1.21736
Hnrnpl	1.28186	1.35242	1.0599	1.63173	1.12623	1.1632	1.44048	1.58467	1.70794	1.54934
Bod1	1.2816	1.1158	0.98082	1.249	1.31741	0.713493	1.35907	1.1271	1.11295	1.21857
Sin3b	1.2807	1.28094	0.852623	1.17203	1.24736	1.54644	1.21077	1.3475	1.22533	1.08908
Hnrnpd	1.28043	1.27736	0.928941	1.50049	1.15172	1.48477	1.42169	1.67128	1.31755	1.29825
Atp13a2	1.28017	1.13662	1.1544	1.04967	1.05245	0.565492	1.58628	1.50081	1.62958	1.44346
1810058I24Rik	1.27785	1.41956	1.78809	1.37927	1.66014	8.13023	0.94244	1.14556	0.781853	0.870219
Manf	1.27725	2.49141	1.46728	1.39639	1.27529	1.89315	1.18628	1.18043	0.933002	1.52203
Gprasp2	1.27723	0.815066	0.763034	1.70488	1.1963	0.33345	1.50774	1.54685	1.49	0.813109
Mpzl1	1.27497	1.00553	0.711074	1.14883	1.84609	2.36759	0.990845	1.19179	1.4753	1.1584
1810041L15Rik	1.27298	0.101395	0.132538	0.187913	1.9558	0.0832301	0.137671	0.178255	0.327043	0.215253
B230219D22Rik	1.27297	1.06273	1.28958	1.51505	1.56061	1.03993	1.8172	1.70617	2.01943	1.40633
Atad1	1.27188	1.30423	1.16396	1.1851	1.11848	0.514223	1.22436	1.37301	1.21902	0.88247
Phax	1.2717	1.13764	1.12917	1.20615	1.1742	1.0993	1.50644	1.23941	1.29207	1.16749
Hp1bp3	1.26989	1.19977	1.04628	1.67308	1.40701	0.975923	1.58425	1.90254	1.07584	1.36012
Spg21	1.268	1.33356	1.00576	1.28909	1.37279	0.834873	1.33663	1.17558	1.49611	1.04895
Lrrc59	1.26785	1.35308	1.14998	1.14307	1.30592	1.72665	1.39389	1.25031	1.50499	0.995822
Ddb1	1.26631	1.4076	1.11486	1.49558	1.23741	2.42443	1.29316	1.57451	0.974002	1.14101
Atf4	1.26414	2.19314	1.31461	1.79711	1.5203	1.51492	1.67312	1.71042	1.60753	1.11578
Tmem30a	1.26374	1.08605	0.832208	1.24792	1.70566	0.799563	0.817633	0.974787	1.58028	1.06602
Cops8	1.26368	1.2524	1.05753	1.55846	1.19256	1.09576	1.40861	1.22645	1.47235	1.10572
Txndc15	1.2628	0.933763	0.771033	0.955844	1.12708	1.23541	1.10297	1.21057	0.978857	1.23625
Sdhd	1.261	1.3212	1.23658	0.987518	1.27997	1.43663	1.10828	1.10973	1.10979	1.00479
Rpn2	1.2589	1.43592	0.9833	0.93775	0.947846	2.92882	1.18384	1.39899	0.936463	0.693497
Rbm5	1.2566	1.07869	1.04316	1.53768	1.23035	1.24177	1.64168	1.84317	1.58985	1.45251
Hes6	1.25601	1.20168	1.16537	1.64929	1.31708	0.521176	1.58223	1.63124	1.94897	1.13387
Snrpb2	1.25521	1.42349	1.30877	1.62887	1.21641	1.40013	1.2751	1.27947	1.01679	1.31859
Nrp2	1.25451	0.0475625	0.0505353	0.500071	0.74	0.294303	0.385197	1.52523	1.57485	0.194255
Tmem57	1.25418	1.01152	0.709603	1.14068	1.35919	0.589218	1.48938	1.58728	1.32099	1.40338
Kansl2	1.25407	1.23144	1.03225	1.46479	1.21849	0.794237	1.47977	1.29407	1.60658	1.38946
BC005537	1.25344	1.20849	1.15562	1.42148	1.51924	0.905589	1.50331	1.51636	1.11508	1.26124
Pitpna	1.25239	1.10044	1.22544	0.850386	1.38233	0.959121	1.09098	1.0827	0.820388	0.658325
Psmd11	1.25237	1.39559	0.885662	1.40243	1.16091	1.18571	1.2953	1.93663	1.49281	1.59194
Tmx1	1.25139	0.882814	0.884189	1.09999	1.19081	0.717208	0.945876	0.951897	0.818152	1.41494
Ociad2	1.24942	0.149815	0.201964	0.259964	0.680595	0.13555	0.61308	0.423828	0.796469	0.487057
Ldha	1.24916	3.32716	1.95561	1.35925	1.55171	2.67392	0.687263	0.498444	1.44226	0.331376
2410002F23Rik	1.2484	1.4571	1.09349	1.20753	0.934513	0.888468	1.47322	1.47251	1.43712	1.7497
Rbm42	1.24789	0.992453	0.739036	0.979361	1.10578	1.33392	1.0874	1.46768	1.3372	1.04922
Arl4a	1.24568	1.55697	1.42674	1.28069	0.7678	5.14783	1.47657	1.31499	1.28987	0.938846
Tm2d1	1.24461	1.24281	1.11976	1.33945	1.4752	0.953437	1.10154	1.27646	1.37611	1.13078
Cops3	1.24419	1.0457	0.712194	1.08049	1.06078	0.825352	0.875441	0.99452	0.9025	1.32444
Apex1	1.24342	1.26759	0.925597	1.33594	0.936095	0.939225	1.41423	1.21083	1.54879	1.2559
Bcl2l1	1.24284	0.880554	0.814844	1.27456	1.40663	0.353876	1.54826	1.96297	1.10958	1.79907
Tmem63b	1.24248	1.45294	1.27939	1.04248	1.18036	0.389814	1.2384	1.16979	1.16651	1.19761
Ube2g1	1.24199	1.24771	1.05714	1.08377	1.43903	0.888569	1.37016	1.40398	1.30871	1.41434
Cyb5r3	1.2418	1.34267	1.08198	0.944453	1.31252	1.97482	0.946825	0.877166	1.23807	0.706458
Ndufv1	1.24127	1.06063	0.797027	0.911591	1.11067	1.42951	1.16037	1.49725	1.34497	1.42822
Celf1	1.24054	1.13871	1.18123	1.23972	1.26676	0.707226	1.23622	1.42796	1.13641	0.989833
Itfg1	1.24036	0.934941	1.0334	0.920402	1.01795	0.773452	1.47196	1.38975	2.36089	1.68486
Tmem183a	1.24033	1.52754	1.45184	1.33067	1.43319	0.504481	1.24891	1.22616	1.14665	1.75323
Nav1	1.24028	1.286	1.39508	1.32868	1.07396	0.667194	1.71503	1.5906	1.55009	1.86095
Sec11a	1.23931	1.43792	1.06984	1.41223	1.25077	2.69012	1.33977	1.1401	1.57766	1.30516
Arhgap33	1.236	1.03826	1.03797	0.755045	1.26477	0.272487	1.22166	1.3203	0.956856	1.2903
Mpc1	1.23538	1.06218	1.20278	0.767285	1.33222	0.991973	0.981321	1.00602	0.591242	1.78748
Map4k4	1.23529	1.21054	1.3604	1.17706	1.21864	0.932856	1.40189	1.61641	0.923402	1.18966
Use1	1.23468	1.08368	1.24065	1.25757	1.25636	1.4514	1.05366	1.01371	1.18829	1.05693
Ufc1	1.23395	1.2745	1.22863	1.12528	1.27057	1.48771	1.18762	1.41945	1.06557	1.05659
Tmed10	1.23252	0.843893	0.732327	1.00127	1.23168	3.19341	0.912405	0.755201	1.04728	1.30088
Eif4b	1.23154	1.27592	2.04903	1.67019	1.31037	1.10904	1.18322	1.26683	1.26871	1.24055
Plk2	1.23099	0.208062	0.443585	0.187401	1.57298	0.724697	0.532988	1.73708	1.33361	0.186865
Psme1	1.23085	1.80626	1.31983	0.960791	1.20699	0.870996	1.06475	1.08754	1.24412	1.1399
Akt1	1.23065	1.53358	1.68224	1.14531	1.06742	1.27536	1.38234	1.11134	1.10098	1.47343
Caly	1.22915	0.657518	0.948534	1.6165	1.02726	0.186444	1.48151	1.56948	2.05981	2.01395
Idh3b	1.22889	1.06647	0.996634	1.20243	1.16373	1.29209	1.14105	1.40848	0.804007	1.27107
Cops4	1.22879	1.20619	0.851783	1.16409	1.18555	1.42427	1.15434	1.35564	1.43808	1.28285
Sv2a	1.2265	1.0287	1.21996	0.772127	1.01012	0.196623	1.33553	1.22791	1.3064	1.37027
Trappc3	1.22625	1.13178	1.0203	1.03686	1.15677	0.807943	1.53637	1.4174	0.832122	1.16358
Chmp1a	1.22508	1.2737	1.20418	1.23817	1.2693	0.854396	1.4897	1.16798	0.775373	1.60797
Trim32	1.2248	0.816347	0.690109	0.641823	0.924995	0.47529	1.43414	1.36452	1.73736	1.50279
Ctsl	1.22164	1.01738	0.736782	0.947112	1.09069	2.21198	0.804204	0.804252	0.605082	0.825894
Stk25	1.22011	1.20166	0.949698	0.909939	1.33265	0.858701	1.40789	1.33137	0.995112	1.26029
Dut	1.21981	1.10021	0.902067	1.18817	1.05457	0.809524	0.741649	0.97995	0.945201	1.2666
Cnot7	1.21754	1.39254	1.12524	1.87519	1.29546	0.432083	1.52366	1.59364	1.50245	1.2085
Commd1	1.21748	1.21068	1.07289	1.33425	1.27813	1.36758	0.987647	1.13298	1.00812	1.34598
Aimp1	1.21724	1.19628	1.14438	1.33385	1.12472	1.21966	1.01229	1.15583	0.97076	1.28091
Cspg5	1.21651	0.974791	0.806669	0.566508	0.84923	0.381515	0.960924	0.700659	1.2782	0.490512
Spop	1.21508	0.845988	1.01776	1.43599	1.38597	1.05872	1.36739	1.29389	1.49281	1.51517
Srsf10	1.21448	1.34232	0.986852	1.47208	1.20825	0.886338	1.51639	1.51741	1.52964	1.31669
Hpcal1	1.21424	1.47151	2.65657	0.696849	1.82882	0.581543	0.740637	0.7659	1.22275	0.663932
Fam19a2	1.21418	0.557228	0.493716	0.228935	0.71294	0.227347	0.183538	0.135627	0.716251	0.148483
Idh3g	1.21301	0.934688	0.857425	1.31698	1.21196	1.01851	1.15868	1.30389	1.18132	0.881953
Psd	1.2117	0.645407	0.941729	1.04439	1.17574	0.125005	0.881251	0.946627	1.81793	1.45885
Gsto1	1.21051	0.720922	0.83464	0.418332	1.03655	0.63549	0.366439	0.700721	0.656122	0.5462
Lsm1	1.21031	1.45242	1.31482	1.57132	1.2361	0.903826	1.17967	1.37341	1.22579	1.26988
Rangap1	1.20957	1.27114	1.10311	1.23537	1.18895	0.652902	1.61978	1.47558	1.68393	1.44957
Rtcb	1.20948	1.01008	0.869002	1.03804	1.22619	1.22629	1.08352	1.25507	1.31741	1.18139
Copz1	1.2088	1.2304	0.910775	1.30031	1.38594	1.29844	1.14426	1.47682	1.05789	1.18645
0610010F05Rik	1.2082	1.20321	1.17749	1.00923	1.06746	0.248392	1.18286	1.18683	1.35317	0.780391
Snn	1.20819	1.20808	1.13331	0.824036	1.23244	0.617631	1.70413	1.7279	1.79073	1.85044
Pigx	1.20803	1.12199	0.839675	1.08355	1.0629	1.07469	1.19025	1.18777	1.00518	1.15347
Ptpn5	1.20723	0.9698	1.15086	0.767651	1.23143	0.150531	1.26055	1.62124	1.41296	1.48939
Vstm2b	1.20706	0.222312	0.270583	0.250698	2.85899	0.287771	0.0641224	0.235978	0.359444	0.211276
Csnk2a1	1.20649	1.00944	1.13429	1.12474	1.23007	0.493226	1.19355	1.26306	0.701631	1.33904
Ttll1	1.20375	1.16061	1.13229	1.09647	1.26442	0.329705	1.28018	1.14889	1.5336	1.25707
Ndrg4	1.20183	0.858271	1.08455	0.806762	1.36549	0.174467	0.915235	1.09019	0.825719	1.0921
Rps27rt	1.20154	1.18	1.69884	1.50739	1.00856	2.55209	1.0804	1.04052	0.884511	1.08936
Mycbp2	1.20082	1.19792	1.41148	1.24868	1.21362	0.698724	1.57079	1.25472	1.38979	1.71786
Mrps18a	1.20066	1.19273	1.29999	1.11957	1.33152	1.23839	1.18463	0.950203	1.49762	0.894247
Syp	1.2	1.33653	1.26585	0.957553	1.25851	0.172549	1.23274	1.08958	1.63279	0.921108
Tspyl1	1.19859	1.07405	1.16958	1.20515	1.42616	0.903131	1.28054	1.48139	1.30244	1.52645
Nyap1	1.19633	1.1514	1.17849	1.3769	1.17935	0.174206	1.50568	1.42259	1.5872	1.08898
Ap2b1	1.19498	1.22676	1.41749	1.03835	1.11682	0.603888	1.16354	1.21371	0.957084	1.08787
Ahsa1	1.19471	1.34	1.02454	1.16048	1.03095	0.963133	1.29289	1.36575	1.03475	1.16818
Acbd6	1.19414	1.12855	1.14175	0.939614	1.10397	0.831743	0.954029	1.02851	0.764513	0.84836
Slc24a5	1.19346	1.17312	1.19866	1.85939	1.41991	0.639756	1.85564	1.74242	1.89544	1.38581
Rbbp6	1.19305	1.32812	1.20508	2.07578	1.33766	1.06072	1.7732	1.7257	1.58312	1.75705
Fam136a	1.19295	1.37643	1.35927	1.38761	1.37731	0.662782	1.14312	1.06672	1.04325	0.972565
Coprs	1.19279	1.09201	1.11413	1.0827	1.24459	0.396606	1.34748	1.16317	1.00425	1.46623
Krit1	1.19261	1.21269	1.14253	1.43649	1.11363	0.782971	1.33356	1.54206	1.19441	1.66679
Ssr3	1.19232	1.1657	1.05461	1.07755	1.20171	2.4056	1.4185	1.23891	0.849996	0.825406
Cisd2	1.19221	1.14393	1.062	1.5253	1.14256	0.898706	1.25632	1.4237	1.08559	1.29177
Kras	1.19156	1.5197	1.30191	1.32093	1.30719	0.75736	1.33182	1.47919	0.846793	0.850188
Pak3	1.19132	2.01434	2.22045	1.96607	1.10882	0.248376	2.92228	2.50543	3.41001	3.3908
Ssr4	1.18955	1.0652	1.41818	1.2006	1.07526	2.61664	1.01534	1.03211	1.02812	1.10308
B3gat1	1.18908	0.624828	0.762536	0.526075	0.783998	0.08364	0.675725	1.00501	0.910683	2.76653
Pcbd1	1.18904	0.907127	1.75591	0.877194	1.28753	0.176696	0.753428	0.440683	0.477793	0.270282
Ephb1	1.18847	0.878345	0.576336	0.331267	1.09302	0.328947	0.639985	0.291051	0.562181	0.476396
Syn1	1.1872	1.07504	1.07443	0.917324	1.19749	0.134741	0.863936	0.972539	1.2491	0.923492
Nell2	1.18564	3.87377	3.13858	0.635194	0.642082	0.199773	1.91246	1.78805	1.41134	1.06183
Kcnq1ot1	1.18519	1.02299	0.890861	1.38486	0.937522	2.16821	1.05877	0.971373	0.748606	1.61783
Ahsa2	1.18467	1.36398	0.917551	0.98103	1.07019	0.841255	1.4874	1.85321	1.24194	1.16516
Snx6	1.18466	1.20402	0.862264	0.994866	1.18985	2.26741	0.831147	0.825262	1.21035	0.609403
Pabpn1	1.1832	0.774622	1.02327	1.15032	1.08438	0.512506	1.43577	1.48067	1.37085	0.642274
Diablo	1.18197	0.950327	0.754753	1.11946	1.15248	0.956416	0.943859	1.00094	0.90713	1.04626
Ptprr	1.18181	0.0461499	0.0442317	0.0547543	0.882714	0.058887	0.0444602	0.0374677	0.11767	0.191378
Ube2m	1.18167	1.42977	1.44613	1.38795	1.2785	1.1602	1.25186	0.967496	1.36869	1.16967
Dusp8	1.18138	0.681831	0.73537	1.1549	1.24848	0.106787	0.838254	1.15248	0.842502	1.27433
Srp72	1.18114	0.961411	1.04268	0.979853	1.11017	1.15584	0.958493	0.860497	1.15317	1.11591
Nras	1.18109	1.61741	1.50999	1.3911	1.58372	1.45054	1.12697	1.11077	1.41944	1.30025
Pigp	1.17981	1.26016	1.08976	2.04775	1.23085	1.28121	0.97338	0.909177	0.976756	0.997083
Sf3b5	1.17912	1.32864	1.1612	1.44828	1.18216	1.88076	1.19178	1.1475	1.02164	1.00175
Pnn	1.17881	1.15839	0.860064	1.33937	1.14495	0.952619	1.48357	1.49019	0.946546	1.43019
Gfod2	1.17816	0.912219	0.874728	0.896705	1.13503	0.265353	1.08438	1.38341	1.14608	1.27061
Nol7	1.17575	1.08053	0.97375	1.13327	1.06264	1.13676	1.22	1.03463	0.849787	1.18166
Unc119	1.17574	1.72239	1.42392	1.21474	1.12811	0.658331	1.31173	1.09104	1.02994	1.24962
Acvr2b	1.17514	1.14491	0.761074	1.54417	1.4353	0.320955	1.54505	1.80321	1.10925	1.10531
Cttnbp2	1.17476	0.23128	0.35404	0.323351	1.09999	0.491482	0.547492	0.679652	0.717173	0.488294
Emc4	1.17444	0.810162	0.793577	0.799079	0.994722	0.706037	0.851784	0.801061	0.978013	0.996368
Ssrp1	1.17426	1.10701	0.791845	1.13638	0.982221	1.59372	1.06389	1.53483	1.28612	1.4705
Wtap	1.172	1.52458	1.40197	2.03364	1.52881	1.18822	1.43398	1.23865	1.46358	1.28059
Hsdl1	1.17055	1.16603	0.988526	0.809265	1.85202	0.417338	0.94317	0.98605	0.614533	1.09024
Mrpl41	1.16983	1.07667	1.13171	1.20506	1.20031	0.740214	1.16245	1.20062	0.798228	1.02359
Macf1	1.16933	1.1436	1.213	1.49969	0.89836	0.881231	1.55878	1.68264	1.9121	1.61083
Mrpl28	1.16902	1.27178	1.1718	1.36474	1.2571	1.33946	1.04662	1.13218	0.943093	1.71411
2010107G23Rik	1.16838	0.78856	0.766388	0.727992	1.22351	0.217707	1.17995	0.765112	1.27798	0.648487
Tmem176b	1.16836	1.28792	1.29435	1.90041	1.55475	3.35525	0.965495	0.983225	0.95373	0.544151
Dctpp1	1.16829	1.23772	1.23249	0.821021	0.83979	0.559743	0.950142	0.908109	0.731248	0.989673
Eny2	1.16553	1.16084	1.0889	1.42141	1.41704	1.72238	1.57414	1.15354	0.919032	1.39583
Dpf1	1.16526	1.19079	1.17997	1.27493	1.07328	0.247129	1.21299	1.51122	1.2821	1.45972
Glyr1	1.16493	1.14731	0.883302	1.28712	1.22071	0.858842	1.46861	1.41724	1.39104	1.41779
Abi2	1.16458	0.984675	1.09515	1.17205	1.20591	0.439491	1.1452	1.00945	0.976138	1.12011
Mn1	1.16388	0.612912	0.357525	0.886146	0.872233	0.451142	1.04216	1.65099	1.97102	2.04587
Vopp1	1.16344	0.973962	1.14816	0.909144	1.04819	0.350711	1.41892	1.49475	0.855757	1.27092
Mapk1	1.16342	1.22826	1.03472	1.22088	1.17403	0.817185	1.24577	1.18468	1.33784	1.01262
Fyn	1.16154	1.05847	1.10981	0.953857	1.25331	0.622484	1.35287	0.930393	0.982672	0.635072
Spin1	1.16153	1.28659	1.38373	1.36436	1.29909	0.917791	1.59752	1.53732	1.18874	1.2709
Rps19bp1	1.16113	1.02828	1.00627	0.888655	1.07552	0.599056	1.01348	0.954886	0.838175	1.2927
Pcsk2	1.16108	0.0809642	0.0762772	0.607732	2.07298	0.126942	1.68519	0.499089	2.96149	0.67226
Hacd1	1.16094	0.838893	1.13317	0.718196	1.03832	0.688167	0.819553	0.582786	1.11114	0.688306
Gm9843	1.15955	1.18053	1.57216	1.34766	1.18366	1.58482	0.981416	1.01101	0.624194	1.11325
Mtfr1l	1.15772	1.06902	0.907941	0.945002	1.09971	0.857559	1.07169	1.15275	1.14098	1.04435
Srp19	1.15764	1.05619	1.04232	1.12851	1.04231	1.33612	1.15081	1.12494	1.33338	0.577795
Atp6v1h	1.15682	0.943603	0.700877	0.879362	0.92139	0.392096	1.04161	1.07826	1.35283	1.246
Aamp	1.15501	1.36178	0.924272	1.63017	1.18946	1.87744	1.43608	1.29296	1.08637	1.28326
4930402H24Rik	1.15178	0.939855	0.981426	1.17119	1.05715	0.574313	1.0566	1.21939	1.04821	1.38383
Cttn	1.151	1.22197	0.926903	0.909869	1.0768	1.16959	1.02518	1.04047	0.8073	0.849028
Plekhj1	1.15048	1.33696	1.11789	1.42514	1.28385	0.98322	1.00589	1.13089	1.20986	1.47934
Sobp	1.15029	0.830939	0.734374	0.800753	0.709011	0.381173	1.30084	0.7156	0.987081	0.852691
Ddx3x	1.14989	1.08964	1.09856	1.44575	1.10227	1.51897	1.03306	1.14182	0.745604	0.914031
Sdhaf4	1.14928	0.932383	1.0415	1.19432	1.10885	0.714914	0.891625	0.832924	1.0057	0.988325
Vcan	1.14917	0.648694	0.806024	0.701744	0.982583	2.5768	0.324667	0.184165	0.309997	0.614415
Ube2e2	1.1488	0.891778	1.08912	0.833428	1.02835	1.01907	0.714846	0.732432	0.79155	1.254
Psmd12	1.14861	0.851172	0.502324	0.692437	0.816387	0.830598	0.843097	1.13918	1.1324	1.01856
Polr2g	1.1484	1.19302	0.928336	1.26743	1.12996	1.07133	1.04037	1.0722	1.18548	1.16772
Nktr	1.14827	1.13191	1.00413	1.24683	1.15784	1.02424	1.42315	1.41836	1.65409	1.29389
2210016L21Rik	1.14816	0.934718	0.982887	0.942225	1.13288	0.718386	1.04727	1.22787	1.25696	1.18818
Dhx30	1.14766	1.06116	0.785993	1.21702	1.03269	0.685013	1.40536	1.66604	1.3848	1.42221
Mrpl57	1.14612	1.03374	1.17679	1.18785	1.11561	0.75024	0.981809	0.986474	0.611355	0.959418
1110065P20Rik	1.14608	1.17601	1.41975	1.26714	1.31187	1.25864	0.83404	0.989338	1.15667	1.21074
Pqbp1	1.14598	1.08102	0.894322	1.01108	1.0042	0.618148	1.27751	1.31993	1.22654	1.15966
Peli1	1.14516	1.01497	0.716909	1.79885	1.20372	0.716877	1.3963	1.84013	1.13104	1.43973
Por	1.14362	1.11371	0.902485	1.05738	1.30663	1.28874	0.786649	0.702911	0.79855	0.406087
Prkar1b	1.14358	1.20824	1.51434	0.807629	1.28139	0.224095	1.18475	1.31676	1.0152	1.1514
Sae1	1.14357	0.844892	0.607714	0.544183	0.991979	1.21144	1.20133	1.32302	1.34752	1.54443
Chic2	1.14241	1.01382	1.15762	1.4372	1.2428	0.990648	1.07922	0.942243	1.26845	0.699333
Zfp292	1.14198	1.11416	0.848861	1.52767	0.960575	0.561064	1.28874	1.28067	1.07742	1.08242
Rgma	1.14151	0.209599	0.0595603	0.197712	0.803081	0.587407	2.4203	0.296247	0.888071	1.28688
Jkamp	1.14073	1.1955	0.994619	1.25626	1.20359	0.692533	0.952301	1.39676	0.835222	0.883179
Scrn1	1.14044	1.36934	1.35917	1.1263	1.03158	0.282637	0.439913	0.577176	1.21692	1.21054
Suclg1	1.14036	1.03102	0.733702	1.17316	0.992888	1.18297	0.95851	0.953986	1.33688	1.01338
Phyhipl	1.13991	0.765794	0.558723	0.796464	0.840185	0.165656	1.80645	2.0355	2.87412	2.12841
Bclaf1	1.13933	1.0763	0.906092	1.23008	1.19596	0.965874	1.39713	1.61879	1.48346	0.937473
Srrm1	1.13926	1.07315	0.992332	1.5126	1.18981	1.10035	1.33719	1.53083	2.17	1.3362
Tmpo	1.13893	0.896411	0.553541	1.28661	1.04956	1.72768	1.53449	1.51764	2.08399	2.02777
Ctnnd2	1.13875	0.391959	0.517289	0.568754	1.66272	0.113267	0.941971	0.621045	1.13624	0.998391
Anp32b	1.13774	1.64161	1.43147	1.77316	1.08662	3.19276	1.03828	0.651112	1.04054	0.717294
Clip3	1.13744	0.996097	0.932703	1.09994	1.37526	0.981067	1.34689	1.35004	1.57167	1.10607
Med10	1.13448	1.81673	1.26103	1.39989	1.19575	0.940746	1.51639	1.14994	1.5925	1.27338
Znhit1	1.13366	1.21335	1.43463	1.28623	1.09323	0.802082	1.20137	1.20178	1.57092	1.72153
Ccdc34	1.13318	0.470122	0.44953	1.0787	1.11855	1.67462	0.848667	1.314	0.989184	0.573167
Atf2	1.13305	0.933624	1.00803	1.29613	1.36142	0.546211	1.26121	1.23245	1.04021	1.08149
Sra1	1.1324	1.12256	1.02224	1.06364	1.12397	1.41892	0.977363	0.957705	1.25231	0.87773
Ergic2	1.13239	0.962041	0.76014	1.14529	1.04802	1.1792	0.955806	0.894556	0.911446	0.982359
Sppl3	1.132	1.06861	0.96407	1.40689	1.16529	1.10292	1.48949	1.20082	0.740977	1.25854
Tmem14c	1.1313	1.21293	1.16973	1.08439	1.23045	1.80802	0.923201	1.05893	0.977915	1.00837
Snrnp27	1.13102	1.16884	1.18415	1.33569	1.14067	1.24555	1.08579	1.0529	1.21634	1.40801
Tmem128	1.12951	0.84578	0.603293	0.94425	0.982705	0.467562	0.77812	1.09191	0.917191	0.64658
Apoa1bp	1.12948	0.920149	0.77655	0.899034	1.03541	1.17732	0.866515	1.07696	1.01154	0.948684
Glrx5	1.12928	1.75224	1.76516	1.46002	1.20933	1.3693	1.41848	1.19451	1.27566	1.41531
Pcdh10	1.12807	0.487542	0.559995	0.307533	0.764636	0.401576	0.642061	0.36642	0.523333	1.7824
Sys1	1.12722	0.827582	0.890525	1.36401	1.31336	1.5029	1.01572	1.03833	1.0055	1.14808
Sbno1	1.12688	1.00637	1.09765	1.01954	1.24801	0.737679	1.19812	1.3743	1.19414	0.959399
Cdkn2d	1.12683	1.23133	1.15795	1.06801	1.4118	0.609335	0.823018	0.713383	0.926546	0.890125
Maf1	1.12672	1.1474	0.965093	1.44971	1.20783	0.729661	1.22415	1.30072	1.09921	1.06117
Wdr89	1.12564	1.43729	1.84448	1.36907	1.22527	1.65455	1.15431	0.962113	1.03725	1.03481
Leprot	1.12546	0.953631	0.727233	0.543656	0.922249	1.14082	1.08968	1.12291	0.865369	1.05397
Ddx17	1.12543	0.980852	1.08835	1.383	1.10667	1.27917	1.4198	1.22829	1.21491	0.969237
Bola2	1.12486	1.21272	1.33383	1.17419	1.14967	1.23772	1.03912	1.04534	1.04052	1.34229
Nfu1	1.12322	0.900287	0.724514	0.877267	1.20679	0.91907	1.16455	0.873314	1.55258	1.30832
Ahi1	1.12307	1.23888	1.46106	2.5544	1.24533	0.353229	2.31111	2.16344	2.33337	1.68179
Slc17a6	1.12301	0.498992	0.420079	0.254648	1.12007	0.117885	1.33441	1.80396	1.96116	0.265291
Tiprl	1.12245	1.01022	0.724258	0.905971	1.05634	0.603162	1.12908	1.22584	1.55589	0.827696
Lmnb1	1.12216	1.35476	0.654989	1.246	1.07751	1.32986	1.21723	1.65403	1.26822	1.20815
Polr2e	1.12132	1.04771	0.749357	0.957602	0.891148	1.15238	0.980527	0.93323	0.722835	0.894088
Hypk	1.12095	1.1972	1.05039	1.24077	1.21883	1.02769	1.07983	0.9972	0.944161	1.01408
Ccdc12	1.11742	1.44503	1.15996	1.52895	0.994914	1.0115	1.50364	1.20336	1.40255	1.38504
Zfp512	1.11378	0.798276	0.729923	0.904788	0.948712	0.440615	1.32284	1.40183	0.843876	1.30489
Otub1	1.11374	1.05441	0.912987	0.979421	1.06901	0.955069	1.09515	0.941969	0.780127	0.869534
Aplp2	1.11184	0.626592	0.699226	0.804575	0.834924	1.41636	0.799611	0.967032	1.03187	1.32184
Cdc16	1.11174	1.14161	0.626015	0.884112	1.02175	1.68677	1.0921	1.17835	0.847126	0.580222
Rbbp4	1.11143	1.01387	0.646752	1.60478	1.00727	1.29947	1.41674	2.00103	1.58462	0.834152
Dync1h1	1.11078	1.05502	1.31679	1.16067	1.19728	0.727876	1.12232	1.25938	1.08967	1.21519
Limk2	1.11073	1.02596	1.26691	0.739705	1.28604	0.445917	1.16117	0.938027	1.12914	0.640651
Mrpl33	1.11045	1.44359	1.51356	1.29389	1.20041	1.57303	0.943188	0.877859	0.995571	1.24084
Vps35	1.10979	1.07771	0.840788	1.17592	1.1512	0.698547	1.12167	1.20292	1.3467	0.823717
Pcnp	1.10964	1.11443	1.22668	1.43741	1.24315	0.807051	1.09164	1.13723	1.21724	1.06777
Pja2	1.10904	1.16781	1.14235	1.12189	1.08299	0.66564	1.34333	1.51642	1.39429	1.23823
Hspa9	1.1082	1.31909	0.965169	1.05258	0.888711	1.24774	1.12329	1.36055	1.39883	1.14954
Mycn	1.10812	0.960405	0.669199	0.461878	0.854139	0.325097	0.640418	0.385472	0.986376	0.466168
Nsa2	1.10802	1.05892	1.60386	1.17002	1.25038	1.92893	0.750043	0.802498	0.757532	1.02549
Kdm2b	1.10771	1.25841	1.02969	1.30333	1.25978	0.516267	1.91678	1.99029	1.39351	1.14135
Nhp2	1.10575	1.18135	1.14687	0.555859	0.952472	0.724869	0.796304	0.798885	0.989924	0.960112
Pigt	1.10521	0.956187	0.780669	0.742381	0.997726	1.14028	1.11936	1.31556	1.23155	0.893421
Ddost	1.10512	1.10448	0.748513	0.999795	1.0153	3.44046	0.973719	1.07696	1.28766	1.22315
Nrsn1	1.10377	0.409274	0.557463	0.496279	1.26524	0.0511937	0.624135	0.437042	1.44135	0.976902
Mrps26	1.10294	1.02093	1.09511	1.1558	1.12654	0.901858	1.25838	1.26331	0.819697	1.24007
Dynlt1a	1.10279	1.26205	1.16872	0.894186	1.08539	0.397115	0.878788	0.786418	0.808479	1.3663
Vapb	1.10252	1.60905	1.61502	1.78224	1.2241	1.50676	0.991415	1.00171	1.30215	0.987064
Rpl23a-ps3	1.10239	1.06934	1.48977	1.10091	1.17796	1.51198	1.09231	0.828632	0.962369	1.09912
Cs	1.10207	1.34398	1.30902	1.03221	1.02815	1.00345	1.25947	1.12582	1.49807	1.02887
Ppp2r2d	1.10183	1.09035	1.05414	0.915399	1.24776	0.625577	1.17993	1.1488	1.59042	0.751697
Ei24	1.10152	1.24827	1.15752	1.4174	1.19761	1.58235	1.06625	0.936333	1.17454	1.07282
Lamtor1	1.09914	1.12276	1.0603	1.54927	1.24854	1.43461	1.08867	0.911661	0.867002	1.49073
Poldip2	1.09787	1.16737	1.01487	0.980807	1.06639	1.23688	1.26236	1.21983	1.14587	0.973594
Arf2	1.09731	0.720555	0.509169	1.02601	1.08096	0.311587	1.17287	1.38096	1.10568	1.24351
Fbl	1.09668	1.34547	0.899242	1.30073	0.86045	1.34597	1.19582	1.07459	0.853036	1.31335
Cpsf6	1.09637	1.20749	1.01413	1.43538	0.976509	0.888982	1.35484	1.58537	0.92576	1.13187
Klhl13	1.09583	0.61858	0.950751	0.58509	1.16646	0.476601	0.481311	0.813634	0.717906	0.254874
Kdelr1	1.09551	1.14415	1.16008	1.0382	1.25112	3.75546	1.07991	1.23319	1.13635	1.33483
Apc	1.09505	1.26852	1.33943	1.25755	1.06928	0.384888	1.25652	1.31735	0.671571	0.94865
Yaf2	1.09471	1.06115	1.10532	1.07584	1.15937	0.937901	0.85612	0.766179	0.761836	1.01749
Adgrg1	1.09466	1.04546	0.574349	1.40999	1.14829	0.11639	1.41594	1.4508	0.861012	0.820448
Echs1	1.09442	1.60242	1.09596	1.47487	0.954849	1.3704	1.113	1.47103	1.1607	0.971376
Apc2	1.09255	0.957319	0.997835	1.32446	1.08386	0.25676	1.46186	1.77582	1.46772	1.20034
Gpr162	1.0923	0.403208	0.463816	0.498847	0.744508	0.260081	0.972213	0.91253	1.62533	1.07133
Magee1	1.08945	0.860904	0.734615	0.636805	1.10452	0.370983	1.19136	1.39976	1.20816	1.61809
Chgb	1.08757	1.45223	1.49828	1.6001	0.837408	0.190431	2.85067	2.77934	2.17753	2.83478
Cdc26	1.08637	1.12909	1.04536	1.56884	1.21525	1.55476	1.49977	1.58636	0.624894	1.07241
Dynlt1f	1.08603	0.994815	0.902639	0.931664	1.08858	0.860461	1.30217	0.793186	1.02837	0.952249
Fopnl	1.0858	1.06137	1.07924	0.982021	1.11762	0.828251	1.08819	1.15029	0.888239	1.192
Ing4	1.08476	0.84299	0.57314	1.23074	1.29496	0.758462	1.50193	1.99937	1.47786	0.999211
Tomm5	1.08418	1.37419	1.45768	1.02407	1.03823	1.62338	1.03439	1.03272	0.606892	1.07374
Actr2	1.08408	1.21949	1.28358	1.08892	1.17382	0.657315	1.09683	0.904458	1.08527	1.2879
Rdx	1.08401	0.792117	0.607042	1.11963	1.07368	1.40078	0.831636	0.736683	0.762882	0.547644
Wdr6	1.08377	1.81648	1.81084	2.78854	1.40934	0.810371	2.72433	3.04262	2.91964	1.87461
Wasf1	1.08335	0.783381	0.720323	0.96422	1.03382	0.343105	1.4155	1.24997	1.62052	1.70797
Chmp4b	1.08332	1.29802	1.48729	1.65509	1.07685	2.50847	1.17918	1.33699	1.53238	0.899185
Stip1	1.08317	1.09436	0.652217	1.07814	0.921323	0.86744	1.09337	1.48731	1.24131	1.15079
Rhob	1.08313	0.706661	0.852536	0.986065	1.19905	1.13544	0.876841	1.05491	1.74785	1.60527
Sap18	1.08183	1.13083	0.884961	1.08908	1.08109	1.22253	1.02659	0.935477	1.3382	1.24863
Bin1	1.08175	1.06849	1.0581	0.762262	1.0101	0.859104	1.03428	0.939803	1.24848	0.92107
Map4	1.08154	1.12502	1.61465	0.90535	1.37337	0.633779	0.751491	0.613572	0.800263	0.69376
Tusc2	1.08019	0.906814	1.00659	0.758382	1.0435	0.672367	1.06346	0.95195	1.15678	1.1528
Zmynd11	1.07984	0.884107	0.867648	1.06276	1.06593	0.73201	1.02865	1.13151	1.06838	0.817203
Cpne4	1.07888	0.161737	0.209577	1.05095	1.11006	0.0735525	0.0316263	0.0417311	0	0.328552
Srrm3	1.07818	0.406529	0.467072	0.568337	1.22662	0.0963439	0.700539	0.850796	0.520806	0.430914
Spast	1.07673	0.996122	0.986552	1.03145	1.15941	0.383923	1.19602	1.03346	0.92947	0.953221
Plppr2	1.07594	0.726878	1.08056	0.798631	0.997369	0.31423	0.921595	0.886145	1.11225	1.23717
Clptm1	1.0747	0.962803	0.886401	0.921356	1.01673	1.23447	0.842181	0.899599	0.873965	0.777111
Tpr	1.07301	1.0404	0.895861	1.30072	1.06836	1.2764	0.984319	0.900668	0.992714	1.01483
Ppp1r1a	1.07279	2.72201	3.10694	1.43551	0.88408	4.62295	0.964646	0.52575	1.03854	0.822844
Abr	1.07213	0.829151	0.67489	0.757477	0.704595	0.419776	1.1103	1.23208	1.08667	1.79958
Sirt2	1.07207	0.850389	0.812925	0.859561	0.985878	0.896973	0.812258	0.772971	0.919158	0.755481
Mapre3	1.07194	0.920013	0.864475	1.6608	1.18609	0.288806	1.12246	1.42397	1.07394	1.35411
Cdk16	1.07186	1.26314	1.4058	1.08084	1.23154	1.08516	1.09397	1.04837	0.966867	1.39514
Nova2	1.07127	0.940622	1.03785	1.26713	1.05444	0.171081	1.13295	0.837677	1.20374	1.36893
St8sia2	1.07049	1.03601	0.811256	0.795575	1.0458	0.425192	1.1527	0.885088	0.798915	1.64205
Panx1	1.06933	1.19505	1.11509	0.685706	0.895811	0.273654	1.1647	1.10436	0.897567	1.50435
Spag9	1.0689	0.91407	1.21694	1.19701	1.04538	0.595851	1.01361	1.33505	1.17268	0.917623
Mthfd2l	1.06878	1.18103	1.11307	1.52578	1.25979	0.420347	1.52917	1.26875	0.962099	1.42067
Hap1	1.06827	2.23426	2.24606	4.6494	0.675753	0.283667	1.10911	1.12793	1.83401	0.707703
Mapk6	1.06798	1.05942	1.02072	1.00193	1.01791	0.277809	1.17806	1.19921	1.18941	0.955514
Sltm	1.06784	0.984307	0.815316	0.91808	1.06177	0.622988	1.24689	1.14414	0.982689	0.945326
Gnaz	1.06748	1.1164	1.30712	1.52635	1.18533	0.164864	1.62058	1.15136	1.58948	1.59896
Robo1	1.06741	0.461562	0.230888	0.306755	1.27764	0.634972	0.340643	0.511907	0.442605	0.586527
Btg1	1.06629	1.13741	0.864609	2.86499	1.1347	1.63155	2.06331	3.04746	2.02138	1.60751
L1cam	1.06515	1.85257	2.13688	1.40684	0.791326	0.208952	1.10259	1.57861	1.52776	1.21867
Csrp2	1.06484	1.41216	1.00614	1.33907	0.83696	2.10754	0.77172	0.841616	1.60759	1.80085
Enho	1.06427	1.5597	2.09957	0.850904	1.03057	0.255151	0.719705	0.83343	0.612781	1.37679
U2af2	1.062	0.989689	0.704289	1.11016	1.00396	1.07281	1.24142	1.30501	1.48925	1.17868
Zfp821	1.06165	0.950849	0.955358	0.99974	1.04207	0.363132	1.32267	1.13288	1.04301	0.862683
Slc38a1	1.06134	0.981514	0.898291	1.02479	1.00058	0.328029	1.25072	1.59281	1.4726	1.1112
Gpbp1	1.06054	0.963806	0.73228	1.26293	1.13363	0.563495	1.16364	1.40697	1.27725	1.04859
Cuta	1.05996	0.988498	0.79252	1.15614	1.05878	1.39929	0.704437	1.03927	1.01992	0.689904
Tmem208	1.05905	1.11741	1.0018	1.01933	0.931828	0.866243	0.988313	0.89254	0.90626	0.938013
Tomm40	1.0588	1.18158	0.857102	0.929791	1.03818	1.09268	1.07541	0.861331	1.25308	1.08144
Chchd6	1.05829	0.736982	0.694328	0.908378	1.20588	0.323871	1.11177	1.03765	1.33264	1.08059
Taf13	1.0563	0.53209	0.47801	0.301628	1.1063	0.442777	0.917685	1.0027	0.798366	0.773321
Eif1ax	1.05621	1.46066	0.792172	0.972181	1.20064	1.37311	0.97176	0.7971	0.911031	0.9815
Magoh	1.05267	1.21132	0.698204	1.22406	0.985629	0.901208	1.09336	0.910528	1.00479	1.35768
Gemin7	1.05258	1.18789	1.16385	0.985612	1.03292	1.16541	0.803107	0.856607	0.90712	1.37555
Sptan1	1.05122	1.13611	1.32216	1.02185	1.02517	1.04822	1.11119	1.32601	1.24708	0.874713
Lsm3	1.05068	1.0125	0.831296	1.13335	1.0059	0.995173	1.00183	1.32202	0.812518	0.901633
Ubn2	1.04914	0.934316	0.80166	1.36517	1.01443	0.547581	1.0663	1.0077	0.881492	1.23423
Vta1	1.04871	0.845362	0.570106	0.700404	0.950499	0.333452	0.832961	1.05819	0.919453	1.28576
Txnl4a	1.04793	1.16706	1.03001	0.770497	0.918958	0.831441	0.974048	1.02914	1.16539	1.09243
Zranb2	1.04793	0.919333	0.855571	1.25661	1.1574	0.631792	1.21108	1.41861	1.30724	1.23146
Scn3b	1.04625	0.850793	1.27959	0.456235	1.15508	0.116887	1.40085	1.21702	1.97136	2.06137
Ggnbp2	1.04609	0.916458	0.772866	0.712144	0.868005	0.983099	0.974808	0.82038	0.951653	0.796444
Ccar1	1.04604	0.788401	0.608194	0.927927	0.800054	0.930725	0.939109	1.13444	0.539162	1.02602
Cntfr	1.04423	0.732342	0.681964	1.1764	1.49485	0.971099	0.261294	0.234761	0.310203	0.288494
Ncbp2	1.04386	0.956437	0.818494	1.11196	1.04871	0.875909	1.04317	0.991877	1.05113	0.967829
1810022K09Rik	1.04308	0.982693	1.12389	0.973855	1.12595	0.615763	0.772519	0.677363	1.18599	0.851183
Fyttd1	1.04302	0.907144	0.876501	1.17866	1.30599	0.444182	1.17741	0.787561	1.02542	0.814172
Cab39	1.04293	0.967555	0.987012	0.925168	1.00164	0.427688	1.06394	0.956964	0.96756	1.28312
Aig1	1.04105	0.975755	0.85797	0.949289	1.01294	0.255175	0.637824	0.748303	0.561076	0.357644
Ccnt2	1.04099	0.608551	0.650415	0.731686	0.752369	0.413215	1.07034	1.21331	0.967325	1.08301
Sdha	1.04073	0.985018	0.656015	0.886435	1.09881	1.65687	0.882808	1.13522	1.23931	1.21909
Syngr3	1.0396	0.836139	0.838514	0.463625	1.02471	0.0855853	1.0528	0.746282	0.388624	0.545473
Llph	1.0389	1.36963	1.23025	0.81473	0.855134	0.759783	1.0543	1.01154	1.16679	0.975968
Nwd2	1.03743	0.0567171	0.0802487	0.121822	7.1023	0.126553	0.0954953	0.106417	0.167668	0.78193
Msmo1	1.03639	1.16795	0.703213	0.623919	0.884041	0.258198	0.93229	0.634703	0.947025	1.23481
Ift20	1.03605	0.789057	0.914568	1.06321	1.28765	1.28852	1.16239	1.02904	1.61404	1.1104
Polr2c	1.036	0.985482	0.67133	1.26727	0.979511	1.03356	0.959405	0.972103	0.877174	0.888843
Ppp3cb	1.03591	1.08818	1.21872	1.23045	0.977559	0.787834	1.20781	1.06214	1.13323	0.687953
Lamtor4	1.03542	1.07721	1.2396	1.14446	1.13265	1.35024	0.929424	0.949663	1.05657	1.02854
Commd3	1.03475	0.741575	0.646478	1.26431	1.1361	1.18504	1.75112	1.90443	1.46255	1.51846
Tmx4	1.0344	0.684689	0.764598	1.27259	1.19509	0.377334	1.48015	1.26203	0.892007	0.968847
Shisa4	1.03368	0.456381	0.437593	0.71004	1.28993	1.11139	0.538552	0.540675	1.01668	1.02486
Nudcd3	1.03125	0.928469	0.77335	0.905525	0.820726	0.539724	1.06755	1.3444	1.22254	1.27986
Cdc123	1.03093	0.940357	0.587741	0.825816	0.870665	0.981179	0.97104	1.27065	1.11031	0.922319
Snx17	1.03088	0.933418	0.76709	1.06644	1.00189	1.77013	0.879934	1.12296	1.13282	0.770181
Rab24	1.03078	0.654915	0.63586	1.09218	0.912603	0.963179	1.03036	1.25085	0.785748	1.05557
Atraid	1.03062	0.921328	0.724609	1.10065	0.98641	1.59176	0.778496	1.13282	1.38812	1.0411
Armc1	1.03039	0.980051	0.829873	0.966194	0.945257	0.790028	1.15134	1.0166	0.726381	0.864841
Macrod2	1.03015	0.744404	1.00437	0.605816	0.983528	0.402938	1.18116	1.11119	1.86989	0.830061
Nkiras2	1.02979	0.88842	0.93492	0.966497	1.16884	0.640882	1.05784	1.10208	0.823712	1.08546
Idh2	1.02959	1.09361	0.656988	1.24571	1.20327	2.43959	1.30977	1.68265	1.10001	0.770304
Upf3b	1.02957	0.804991	0.779768	1.05581	1.00642	0.568311	1.22917	1.37416	0.996954	0.904001
Mycl	1.02941	0.72052	0.649757	1.30105	0.815018	0.15869	2.25513	2.10221	1.25537	1.54009
Ap1ar	1.02869	0.798565	0.912042	0.913804	1.07225	0.377858	1.23898	0.862497	0.949039	1.24553
Whsc1	1.02756	0.92101	0.987579	1.15015	0.987112	0.488523	1.11984	1.09094	0.973503	1.05564
Paip1	1.02682	0.927341	1.04041	1.36306	1.22948	0.352008	1.44506	1.33008	1.39952	1.45645
Bmyc	1.02656	0.978388	1.28357	0.821181	0.767491	1.38686	1.0434	0.95961	1.30975	1.23305
Ppp2cb	1.0264	0.983458	1.03908	0.934922	1.27488	0.885889	0.864953	0.912307	0.818414	0.877255
Mllt3	1.02543	0.858221	0.949972	0.750735	0.972593	0.504864	1.30441	1.32655	0.828402	0.830118
Prrc2c	1.02526	0.978997	0.862165	1.43423	1.17946	1.23455	1.1266	1.36792	1.00345	1.41964
Sf3b4	1.02481	0.855279	0.589403	1.01138	0.85576	0.938942	0.988083	0.986591	1.32973	1.16101
Dnajc2	1.02445	1.13454	1.08361	1.02292	0.991935	0.53137	0.934639	0.889898	1.08491	0.868592
Med25	1.02424	0.773348	0.723654	1.24801	1.07623	0.984754	1.67972	1.28527	1.33062	0.667521
Fzr1	1.02423	0.751618	0.713449	0.929417	1.18726	0.66008	1.15901	0.979933	1.06479	0.921767
Fundc2	1.02417	1.10085	1.12735	1.13782	1.08427	2.24716	1.06922	0.789626	0.928449	0.660653
Azin1	1.02397	0.933712	0.898174	1.00485	1.05534	0.454919	1.37966	1.16658	1.43248	1.42009
Sap30	1.02373	1.12401	0.525017	1.08162	0.927464	0.329616	1.03162	0.918131	0.931873	0.871566
Kdm5b	1.0231	1.16315	0.924841	1.6808	1.16134	1.03481	1.6398	1.49254	1.22658	1.28546
Ypel1	1.02193	0.819672	0.70054	0.90403	1.33062	0.338848	1.7112	1.6282	0.954205	1.17953
Fam104a	1.02189	1.41311	1.37437	1.56023	1.05712	1.20003	1.1151	1.30353	0.976495	0.956885
Rnf146	1.02099	0.781555	0.628272	0.954943	1.04939	0.622496	1.13778	0.9072	0.898902	1.19075
Elp5	1.0207	1.17497	1.11465	0.859531	1.19825	0.776823	0.931538	1.0667	0.891631	0.943186
Zfr	1.01989	1.11186	1.1031	1.46319	1.01246	0.866006	1.40732	1.23463	1.5458	1.14393
Dbi	1.01986	1.0298	0.782959	0.942491	1.10423	2.17393	0.749362	0.620618	0.565723	0.743408
Ppp2r5b	1.01888	1.04181	1.20509	0.956843	1.1455	0.344622	0.885551	0.868434	1.21784	0.936701
Atl1	1.01717	0.726048	0.593135	0.508413	1.01596	0.183589	0.687448	0.986093	0.985455	0.933104
Tfg	1.01711	1.04924	0.725287	1.04971	0.952635	1.05794	0.970756	1.02337	1.09039	0.98626
Pde6d	1.01687	1.33725	1.1071	1.24907	1.04907	1.05666	0.935454	0.964502	1.05241	0.988431
Slc30a9	1.01553	0.890066	0.881676	0.95484	1.02709	0.497113	0.985386	0.864453	1.01951	1.00441
Brd4	1.01508	0.973787	0.927942	1.2101	1.03614	0.918677	1.07355	0.917907	0.892034	1.0207
Ogfr	1.01504	1.13482	0.974156	1.4532	0.99158	1.04242	1.16489	1.43161	1.1204	1.08293
Hdac3	1.0146	1.21404	0.988777	1.06385	1.00065	0.987008	1.31235	1.00106	1.45967	0.971806
Camk1	1.01426	0.939793	0.910576	1.02006	0.912474	0.492295	0.968074	1.02881	1.06113	1.08362
Rsl1d1	1.0139	1.19504	0.805768	0.99716	0.830738	0.800074	1.11335	1.02851	1.02601	1.08092
1110008P14Rik	1.01384	1.08725	1.32134	0.81561	1.24387	0.785322	0.854805	0.539123	0.679878	1.43269
Nudt3	1.01327	1.11587	1.24937	0.91273	0.984536	0.452703	1.23846	1.00184	1.14701	1.23116
Pnmal2	1.01295	0.898233	0.894253	1.58939	0.990525	0.451939	1.83314	1.7954	2.22189	1.76417
Cadm3	1.01184	0.998692	1.20749	0.526066	1.04146	0.17491	0.995058	0.90889	1.18606	1.48278
Chd7	1.0114	1.02412	0.76505	0.993333	0.99884	1.36371	0.921115	0.601244	1.14464	0.512656
Immt	1.01027	0.890157	0.604714	0.77512	0.859521	0.973936	0.736843	0.881499	0.968827	1.07863
Ppp2r2b	1.00975	0.634004	1.30209	0.852218	0.622132	0.157019	0.571075	1.87545	1.07773	0.573258
Nxn	1.00932	0.620083	0.476641	0.356627	0.837384	0.976776	0.106194	0.148166	0.14416	0.47168
Tmed7	1.00884	0.935729	0.784194	1.06772	1.11644	0.98204	1.10494	0.94995	0.633557	1.55232
Mrps18c	1.00883	0.917207	1.03293	0.896911	1.21962	0.693286	0.898252	0.87574	0.723067	0.992369
Dpp3	1.00727	0.967295	0.702801	0.761339	0.920244	0.943249	1.01079	1.34381	0.983479	1.1301
Usp14	1.00607	0.981963	0.752881	0.584741	0.97009	0.793115	0.738464	0.753517	0.713498	0.852519
Pgm2l1	1.00584	0.626631	1.28102	0.421298	1.09726	0.232227	0.604855	0.663284	1.28809	1.11836
Slc39a6	1.00569	1.22489	0.894096	0.922556	0.881464	0.57982	1.25564	1.29641	1.02816	1.1166
Cep170	1.00466	0.971745	1.00979	1.0461	1.01254	0.412822	1.21015	1.14332	1.25117	1.22159
Zmiz1	1.00458	0.94269	1.16228	1.13501	0.884856	0.366943	1.16093	1.12525	0.678601	1.01594
Atp9a	1.00403	0.874517	1.01898	0.503872	0.799769	0.810572	1.03229	0.933496	1.58005	1.54194
Insm1	1.00403	0.143255	0.0458685	1.24871	1.02707	0.0575404	0.332909	0.231263	0.939844	0.532186
Atcay	1.00345	0.989835	1.0009	1.00632	0.820319	0.135457	1.02724	1.0408	1.59209	0.780351
Psmd1	1.0025	1.10282	0.689365	0.966055	0.956198	0.864637	1.15366	1.2116	0.823382	0.712692
Slmo2	1.00195	1.38836	1.29411	1.15829	1.05715	0.641045	0.946194	0.932582	0.78017	1.18465
Mgea5	1.00192	0.764558	0.8129	0.819708	0.924889	0.537274	1.14956	1.09685	1.09563	0.861171
Zcchc17	1.00111	0.751977	0.872574	0.841215	0.973826	0.701341	0.993894	1.11596	0.733789	1.21311
Smarca5	0.999396	0.968202	0.681182	1.40027	0.979502	0.860447	0.974502	1.21097	0.807552	0.866352
Mrpl51	0.999184	1.17566	0.993637	1.12586	1.20369	1.28252	0.741004	0.804545	0.992224	0.940356
Kif2a	0.998885	1.07604	1.05526	1.13823	1.11987	0.598003	1.17525	1.28139	1.25914	1.60548
Gtf2i	0.998096	1.13374	1.03062	1.43895	0.976306	1.62933	1.29734	1.03751	0.891042	0.775159
Jph4	0.99678	0.826322	1.29605	0.785532	0.955674	0.130477	1.4608	1.20451	1.55097	1.615
Sccpdh	0.995115	1.05679	0.988669	0.777484	0.999082	0.440102	0.879677	0.927372	0.916134	0.697168
Rnf2	0.994174	0.83573	0.683828	0.934223	1.0689	0.640814	1.12626	1.13294	0.836345	1.38284
Lsm8	0.99386	0.997899	0.670944	1.63843	0.940308	0.8131	1.0237	1.15725	1.10152	1.21939
Asna1	0.992862	0.950482	0.900549	0.977824	0.786512	0.855691	0.926343	0.853622	0.933187	0.939275
Vps4a	0.991936	1.10418	0.929729	0.830178	0.982902	0.629925	1.0029	0.856782	0.657072	0.677318
Zfp462	0.990551	0.634765	0.721187	0.940131	0.823075	0.392076	1.17611	1.47388	1.19526	1.10543
Ilkap	0.990362	1.08367	0.912578	1.16357	0.976234	1.10362	1.20028	1.22124	1.22874	0.926848
Wdr26	0.989839	0.714912	0.847605	0.839716	0.947505	1.01858	0.986072	0.666312	0.48867	1.04087
Dbndd1	0.989768	0.781214	0.848223	0.690509	1.06413	0.116095	1.1056	1.13346	1.10785	1.2849
Ik	0.989409	0.819757	0.681582	1.10546	0.924607	0.941846	0.952683	1.19375	1.04035	1.04294
Txnrd1	0.988352	1.39598	0.977014	1.06006	1.09482	0.505249	1.26035	1.29173	1.1996	1.32831
Mocs2	0.98739	0.888787	0.867622	1.00472	1.17795	0.744284	1.07828	0.916454	0.649714	0.979641
Clpp	0.987366	1.18916	1.01984	1.1941	0.85529	0.767199	1.02421	1.09725	1.20786	1.2142
Ndnl2	0.986696	0.609451	0.537014	0.852288	1.50082	0.597021	0.669093	0.670489	0.727404	0.472334
Mtdh	0.986471	1.13795	0.898368	1.19615	0.975125	1.44241	0.998128	1.05651	1.35609	1.11068
Sar1a	0.985555	1.09654	0.768223	1.00748	0.857099	1.66226	1.11406	1.19282	0.7863	1.10158
Rpp21	0.984804	0.897884	1.0047	0.889555	0.928073	0.815341	0.748231	0.753064	1.10949	0.828616
Miat	0.983544	0.628854	0.678364	0.895321	0.974081	0.212446	1.03661	1.16716	0.851328	0.610059
4933434E20Rik	0.98342	1.21109	1.10641	1.43107	1.13713	0.77547	1.06987	0.804358	0.961168	0.66821
Tmem9b	0.983295	0.843147	0.755695	0.488657	0.960925	0.697285	0.880533	0.660561	1.19421	0.673967
Med30	0.983137	0.863264	1.04597	0.863042	0.850426	0.533873	0.975114	0.838683	0.750544	0.684273
Fsd1	0.982209	0.943084	0.927715	0.730458	1.03029	0.255734	0.760552	0.886759	1.13169	0.884014
Tln1	0.981354	1.10795	1.32953	0.817065	1.06354	0.622847	0.975345	0.730401	0.997217	0.47935
Mrpl14	0.981265	1.0634	1.00643	1.35054	0.856916	1.01184	1.15111	1.19463	0.956697	1.0405
Ap2a2	0.981242	0.852497	0.924432	0.733517	1.24211	0.903998	1.01616	0.815876	1.05699	0.759069
Ralgds	0.981101	1.06668	1.13182	1.28241	1.21863	0.557759	1.28485	1.10898	1.29731	0.642858
Mtpn	0.980835	1.11492	1.28956	1.21673	1.07195	1.40333	0.915805	0.685175	0.970442	1.02386
Mrps15	0.9806	0.819429	0.871787	0.737034	1.01061	0.874715	1.01074	0.684948	1.21784	0.990881
U2surp	0.980356	0.750256	0.67131	0.778505	0.831658	0.935298	0.911262	1.02688	1.08712	1.01643
Ap3b2	0.980186	0.75868	0.630235	0.623551	0.81084	0.106052	0.84534	0.883165	0.593322	0.878116
Mapk8ip2	0.97999	0.860018	0.818819	0.806319	1.05406	0.154262	0.878593	1.1337	0.75857	1.12302
Add2	0.979926	1.09225	1.07246	1.04942	1.03176	0.183439	0.943687	1.37022	1.04709	0.871514
Vezt	0.979806	0.81046	0.712821	0.869595	0.8651	0.634917	1.19878	1.20189	0.923117	1.11719
Hmgcr	0.979582	1.59417	1.59161	1.00961	1.23996	0.313959	0.94904	1.03584	1.11992	0.908094
Dtnbp1	0.97951	0.696695	0.845221	0.566542	0.813856	0.599446	1.0654	0.959206	1.13051	1.68032
Bcl11a	0.979197	2.80468	1.63028	1.1765	0.523034	0.409885	5.4072	3.53004	1.4705	1.4241
Lcmt1	0.979153	1.07212	1.1907	0.86964	1.002	0.55161	0.978541	0.823335	0.806668	1.00357
Comt	0.978997	1.58997	1.37852	1.22694	0.972101	2.34428	1.26293	1.27085	0.988103	1.19628
Ppp2r2a	0.978125	0.967369	0.760863	0.831065	0.847253	0.795615	0.971486	0.966046	0.722309	1.24008
Btbd2	0.977344	1.02804	1.16008	1.18654	1.12414	1.17281	0.873944	0.848561	0.624651	0.944137
Rnf115	0.977153	0.843228	0.752456	0.854595	0.959828	0.580167	0.969749	0.978718	0.976567	1.00423
Haghl	0.977011	0.805744	0.66762	1.13381	0.908398	0.498122	1.089	1.2306	0.907695	0.953582
B630019K06Rik	0.976541	1.1424	1.04962	1.96156	1.09359	0.251664	3.05137	2.16427	2.94135	6.512
2700029M09Rik	0.975427	0.789901	0.736973	0.660812	0.846017	0.835754	0.863785	0.813948	0.986139	0.801175
Kif1a	0.974029	1.08195	1.29663	1.0902	1.06355	0.313921	0.936222	0.645657	0.728256	1.04846
Tmco1	0.971903	0.79898	0.696507	0.830356	0.862142	1.5049	0.870512	0.954618	0.958995	0.896679
Eif2s3x	0.971744	0.762181	0.887973	0.777125	0.975187	0.617128	0.90561	1.05864	0.791889	1.26167
Bptf	0.970127	0.944577	0.94453	1.4673	1.09261	0.960508	1.20164	1.13491	0.898686	1.15262
Ube2a	0.969132	0.696143	0.558138	0.782384	0.924079	0.776653	0.695588	0.781985	0.76666	0.944811
Prmt8	0.967083	0.818119	0.73601	0.406526	0.285598	0.0533487	0.259323	0.213944	0.208864	0.0724182
Setd3	0.966893	1.09542	0.939679	0.906596	0.938562	0.825342	0.854376	0.907598	1.00807	0.793505
Ilf3	0.96675	0.891447	0.73855	1.08246	0.897681	0.722965	1.16995	1.30622	1.04389	1.05149
Copg1	0.966735	0.866927	0.798675	0.752046	0.837498	1.11904	0.762286	0.985248	1.03041	0.826524
Pa2g4	0.966602	1.25586	0.800452	0.8514	0.9687	1.14616	0.821088	0.974768	0.91799	1.7057
Scn3a	0.966575	0.583224	0.600849	1.04003	0.966159	0.244707	1.11247	0.880293	1.24966	0.823696
Lsm2	0.966387	0.639013	0.529371	0.588145	0.861222	1.48973	0.889579	0.685444	1.14554	0.944149
Mrpl11	0.966336	1.05346	0.932009	0.903432	0.995881	0.763815	1.12989	0.95165	1.12177	0.946976
Map7d2	0.965874	0.214985	0.458491	0.356934	1.39943	0.0950802	0.398313	0.590344	0.427157	0.325917
Mrps6	0.965536	1.46094	1.00551	1.22027	0.783502	0.475632	0.731959	0.659546	0.71414	0.956999
Abhd17a	0.965224	0.947759	1.19745	1.01128	1.07313	0.994438	0.975468	1.01603	0.813062	1.36554
Leprotl1	0.965057	0.990707	0.664756	0.845425	0.91059	0.593943	0.990468	1.13937	0.740573	0.717595
Mpdu1	0.964444	0.87931	0.705819	0.746594	0.861026	0.929408	0.91456	0.957159	0.949827	0.66401
Idi1	0.964372	1.21826	0.917516	0.432147	0.961808	0.215069	0.885362	0.789676	1.00849	0.970838
Srpk1	0.964171	0.918152	0.760711	1.01366	0.87362	0.485693	1.04241	0.852489	0.877601	0.744691
Fkbp2	0.964056	0.969374	0.75855	0.850907	1.05516	1.06034	0.732782	0.68806	0.917683	0.759966
Ankrd46	0.963337	0.651776	0.68942	0.504154	1.03782	0.660179	0.873679	0.975684	0.919787	0.870001
D430019H16Rik	0.96333	1.15982	1.13747	1.18706	0.734555	0.412263	1.61007	1.56339	1.00782	1.50734
Igf1r	0.962158	0.690888	0.801739	0.596361	1.0482	0.595193	0.983744	0.873151	0.862673	0.929403
Pin4	0.960585	0.910702	0.825406	0.93578	0.949254	0.585972	1.10836	0.832178	0.945596	0.92467
Pantr1	0.960253	0.0342438	0.0397414	0.293698	0.58908	0.111963	0.659898	0.850128	0.169195	1.1403
Eif4a3	0.960185	0.925645	0.509188	0.945336	0.889226	0.970223	1.03928	1.35529	1.33025	0.65071
Mrps36	0.958723	1.20485	1.21944	0.948568	1.04315	1.16205	1.0039	0.829442	0.873841	0.854451
Anapc16	0.958283	1.24735	1.21105	1.29444	1.12736	1.24556	0.914126	0.942006	0.642298	1.04441
Klhl7	0.958267	0.737746	0.623557	0.779309	0.738045	0.370677	1.13665	1.52838	1.10608	1.07689
Ap1s2	0.957896	3.48791	5.37917	2.18365	0.946943	0.255428	1.10465	1.07197	1.08457	0.77074
Ghitm	0.956832	0.567972	0.569306	0.54434	0.974224	1.06343	0.803708	0.85903	0.760761	0.956679
Senp6	0.9565	1.06468	0.905253	1.28694	1.05552	0.99198	1.04376	1.02558	0.909186	1.11443
Psme2	0.955898	1.52888	1.2596	1.32562	1.15005	1.31616	0.80529	0.860005	0.672855	0.735254
Csrnp3	0.955446	1.03117	1.03773	0.978603	0.63517	0.259992	1.22865	1.17279	1.0744	0.971837
Mrpl50	0.954729	0.780507	0.691924	0.857707	0.837283	0.689476	0.839623	0.979727	0.833949	1.02634
Atp1b3	0.954584	0.797431	0.81304	0.687284	0.951769	1.11068	0.80802	0.77297	0.74718	1.14965
Selt	0.954379	0.871833	0.910891	0.92113	1.159	0.747234	0.932586	1.07762	0.94995	0.592074
Mrpl48	0.953642	0.75317	0.772924	0.822301	0.966292	0.71297	0.719088	0.751891	0.665599	0.914138
Cend1	0.953059	1.17431	1.42893	0.72055	1.03465	0.104211	0.826732	0.730077	0.7642	0.650207
Ssbp2	0.952937	2.5272	1.48931	3.47411	0.927478	1.08379	1.68803	3.57109	1.04275	3.0279
1810037I17Rik	0.95218	0.771177	0.802587	0.915335	0.979831	1.24474	0.748062	0.704271	0.843425	0.400116
Cux1	0.951268	1.12527	1.02034	1.2055	0.840825	0.677998	0.889909	1.00134	0.680497	0.775294
Suds3	0.951195	0.844443	0.989294	1.08305	1.15299	0.826124	1.2771	0.973706	1.19089	1.0043
Prkacb	0.951135	1.07189	1.26225	1.30967	1.00703	0.529627	1.15333	1.40154	1.09659	0.969872
Cadm4	0.951049	1.07739	1.04904	0.936538	0.612102	0.16588	1.39284	1.45887	0.547297	0.873772
Rpl10-ps3	0.949979	0.972854	1.42855	0.888952	0.87096	1.41999	0.759289	0.627232	0.664059	0.893546
Mrps12	0.949518	0.999248	0.898918	0.922942	1.03669	1.05105	0.843292	0.834598	0.73245	0.711894
Cdv3	0.949232	1.21222	1.28458	1.12887	1.40784	1.19029	1.08483	1.08883	1.81297	1.7754
Mad2l2	0.948998	1.37337	1.01719	1.405	1.26583	0.338604	1.19612	1.29481	0.939963	0.776326
Med21	0.94859	0.763253	0.827164	0.811061	0.738189	0.976723	0.724947	0.695703	0.757407	0.690091
Enc1	0.948006	1.12584	0.677657	0.366703	1.09605	0.214217	0.509074	0.702268	0.585648	0.555087
Prpf40a	0.947466	0.884949	0.630397	1.11107	0.803107	1.0355	0.968528	0.940399	0.648892	0.974216
Hsd17b12	0.947094	0.81255	0.699534	0.681409	0.731588	0.568661	0.87789	0.804699	0.712603	1.14066
Rusc1	0.946929	0.879928	0.775287	0.536447	0.888858	0.322851	0.735257	1.11744	1.0326	0.860195
Fibp	0.94672	0.783326	0.725437	0.99019	0.967346	0.956501	1.1132	1.31943	0.936642	0.856599
Syncrip	0.945864	1.07706	0.698932	1.03392	0.921584	1.05394	1.11297	1.44241	0.749117	1.16292
Parvb	0.945713	0.149522	0.494309	0.333087	1.66649	0.056583	0.261579	0.0725647	0.500167	0.049995
Rgs17	0.943044	0.817453	0.791335	0.616315	0.895929	0.117168	0.906078	0.853537	0.656175	0.681558
Sox12	0.943006	0.942306	1.16373	0.928181	0.966037	0.348931	0.970651	0.822058	0.860179	0.837381
Nudt11	0.941742	0.846261	1.0553	1.35497	0.853029	0.211532	1.19374	1.48777	1.00504	0.869423
Faim	0.940934	0.967043	0.944685	0.723445	1.00348	0.742366	0.802887	0.853717	0.795354	1.02866
Stk16	0.940858	0.906661	0.905459	0.920394	0.91341	0.788676	1.15303	1.19119	1.07546	0.776515
Rnf126	0.939538	1.13979	1.1124	1.08214	0.88507	0.722052	1.23027	0.928249	0.991834	1.43243
Dpm2	0.938926	0.796872	1.07331	0.797489	0.879836	0.694118	1.04149	0.955898	1.20558	0.871986
Msl1	0.938371	0.866543	0.985769	1.10728	0.925834	0.996625	0.831477	1.08626	0.782195	0.716189
Capza1	0.937583	0.704057	0.688856	0.570437	1.01649	1.0057	0.890553	0.947738	0.864722	0.740799
Lsm5	0.93538	1.07924	0.978004	1.2362	1.02612	1.45204	0.971369	0.909689	0.809024	1.16778
Trp53bp1	0.935218	0.75314	0.751917	1.31285	0.74997	0.311845	0.900193	0.854493	0.937185	1.08612
Evc2	0.934553	0.00758568	0.0140714	0.00219033	0.458057	0.172646	0.0100795	0.0135504	0.0452935	0.0565436
Pum2	0.933979	1.00768	1.00547	1.41655	1.06301	0.688171	1.16915	1.25034	1.23259	1.0293
Abhd17c	0.93317	0.961575	1.04202	0.849999	1.01692	0.434787	0.881467	1.19832	0.91751	1.0158
Rgs2	0.93305	0.642045	0.442372	0.507888	0.94137	0.20353	0.92743	1.24034	0.782132	1.11798
Cdk5	0.932986	0.929571	0.781495	1.02525	1.02166	0.425689	0.936761	0.927994	0.844392	1.01039
Pdcl3	0.932612	1.05455	0.719504	0.787526	0.950453	0.819131	0.650105	1.12066	0.594105	0.856268
Huwe1	0.932175	0.955006	0.9709	1.28493	0.944262	0.679635	1.32064	1.15956	1.11294	0.772504
Timm10b	0.930834	0.686598	0.792019	0.887461	0.801304	1.01816	0.765665	0.662055	0.730373	0.893196
Deb1	0.930693	0.954454	1.06555	0.858039	0.959467	0.600887	0.975574	0.693875	0.898924	0.740716
Rtn2	0.92959	1.14395	1.41716	0.919111	1.15407	0.253601	0.895262	0.800502	1.03505	0.777927
Ppid	0.929275	0.785049	0.485583	0.632007	0.868114	0.746917	0.866561	0.954984	0.964777	0.645234
Ifngr2	0.927791	0.433809	0.544427	0.430332	1.0038	0.482146	0.332018	0.447778	0.62417	0.826844
Ubl7	0.927378	0.77581	0.624827	0.751821	0.83658	0.609763	0.863166	0.91868	0.633692	0.806224
Glud1	0.925402	1.14142	1.03052	1.1047	1.1191	0.876237	0.929704	0.936033	1.05265	1.41195
Chga	0.925357	0.960975	1.41686	0.596762	0.841808	0.126813	0.934353	1.00687	1.24241	0.725001
Csnk1d	0.9251	1.11119	0.990407	1.58029	1.05936	0.801802	1.44276	1.0794	1.17683	0.976448
Kdm6b	0.924982	1.04144	0.929231	1.6836	1.16586	0.628763	1.33285	1.10746	1.61736	1.54332
Sez6l2	0.924975	0.751952	0.985532	0.716511	0.857454	0.116106	0.959286	1.12452	1.37084	0.827072
Nkap	0.92489	0.469098	0.481866	0.636898	0.880124	0.371541	0.633797	0.401163	0.625983	1.03071
Wbp11	0.924664	0.975696	0.814275	1.12847	0.959286	0.856501	1.05483	1.16478	0.925084	1.00564
Zbtb12	0.923727	0.711124	0.596615	0.628647	0.665327	0.172657	1.00071	0.903506	0.940867	0.967755
Eif4g3	0.923653	0.816413	0.957824	1.26236	0.992595	0.608331	1.06777	1.07937	0.793784	0.480375
Dctn1	0.923332	1.30495	1.01473	1.34359	1.10737	0.765645	0.968169	1.09298	1.11167	1.04012
Taok3	0.923042	0.791746	0.983146	0.799403	0.987886	0.38691	1.05085	1.11961	0.811502	1.17162
Chst8	0.922019	0.403639	0.522189	0.179399	1.1315	0.0615824	0.207961	0.862951	2.23028	0.724209
Rnd3	0.921194	1.53485	1.35967	0.70017	1.16152	0.586788	0.617596	1.15742	1.07813	0.333248
Snrpa1	0.921156	0.884339	0.574317	0.845299	0.785481	0.788916	0.914624	1.26009	1.0036	0.817491
Slc25a51	0.921011	1.18291	1.048	1.10577	0.952777	0.741263	1.04457	1.26056	1.31628	1.25972
Atp2c1	0.920983	0.737656	0.596872	0.49905	0.905291	0.303821	1.04536	0.590344	1.36953	0.622932
March6	0.91974	0.657019	0.79005	0.943868	0.772834	1.25125	0.782007	0.678813	0.596258	0.767327
Cntnap2	0.919726	1.34874	1.55934	0.610626	1.25269	0.127516	0.632919	0.666345	0.857392	0.697573
Klhdc3	0.919076	0.827095	0.873506	0.920282	0.941954	0.576645	0.936009	0.84167	0.652717	0.753615
Fam177a	0.917551	0.99312	1.11226	0.505885	1.11174	0.657181	0.544193	0.723242	0.907318	0.648337
Prkcsh	0.917522	0.612279	0.485606	0.670451	0.681081	1.26062	0.816556	0.87097	0.852493	0.680641
Mphosph8	0.917206	0.547914	0.468428	0.566675	0.781477	0.684684	0.647921	0.657681	0.992349	0.578976
Dnajc19	0.916396	0.814285	0.867586	0.895049	0.899754	0.920293	0.836377	0.766555	0.984322	0.873217
Fem1b	0.915333	1.03145	1.38385	1.05631	1.00648	0.390057	1.00245	0.656677	0.865784	0.946441
Thoc3	0.913562	0.710751	0.708122	1.0411	0.902392	0.657853	0.973099	0.974042	1.06491	0.597486
Trib2	0.912379	0.579701	0.50399	0.680323	0.538132	0.669892	1.2811	1.37547	0.657742	1.07912
Ubl3	0.912352	0.563289	0.482021	0.746246	0.979761	0.755565	0.519527	0.541167	0.333831	0.688108
Coro1a	0.912334	1.12292	0.847186	0.350318	0.634257	0.0993145	0.663296	0.548249	0.591749	0.728915
Mydgf	0.912153	0.901236	0.759887	0.780596	0.841381	1.56209	0.850865	0.551471	0.803741	0.704455
Sdf2	0.91166	0.968125	0.946368	1.00827	1.06629	1.56388	0.849732	0.868889	0.800766	0.978396
Rchy1	0.911236	0.688614	0.612505	0.790946	0.866353	0.736528	0.825558	0.796491	0.838086	1.07442
Ndufa9	0.910113	0.797523	0.476703	0.563074	0.708182	0.953287	0.76081	0.928556	0.662035	0.600648
Ptn	0.908939	4.66376	3.7586	1.75489	0.623663	17.1568	1.08389	0.679583	0.795244	0.658408
Rp9	0.908682	1.13829	1.49322	0.974295	1.08012	0.993797	0.854532	1.02857	1.22395	1.18457
Slc25a17	0.908619	0.920068	0.834775	0.832683	0.899254	0.60691	1.00205	0.838867	0.784735	0.853243
Tac1	0.908028	0.250289	0.142406	0.0585043	3.50864	0.0747798	1.51393	0.308089	0.876491	0.088443
Aprt	0.907596	2.26201	1.89726	1.32115	0.898873	2.2854	0.726782	0.799222	0.955295	0.894215
Mllt4	0.907306	0.572508	0.508043	0.675483	0.991744	0.420011	0.805863	0.642355	0.685746	0.326591
Zfp57	0.906793	0.694381	0.627774	0.490379	0.685359	0.408775	1.03121	1.34089	0.724246	1.14482
Amfr	0.90615	0.947895	0.73179	0.979271	0.838305	0.665039	0.927429	0.827982	0.450915	0.716377
Stau2	0.906123	0.635819	0.64544	0.502004	0.786604	0.295705	1.11612	0.954042	0.724942	0.784384
Amz2	0.906028	0.922774	1.12653	0.890653	0.961358	0.702933	1.01891	1.05525	1.17117	1.33148
Tax1bp1	0.905084	0.78689	0.545538	0.772371	0.873808	0.803272	1.06757	1.09449	0.864617	1.14223
Zfand3	0.904456	0.829654	0.694402	0.766179	1.00546	0.768902	1.041	0.866396	0.76431	0.767002
Sugt1	0.903721	0.853978	0.763236	0.702788	0.966929	1.26616	0.741347	0.572709	0.844432	0.316271
Grik5	0.903316	0.717136	0.862728	1.04713	1.08835	0.468321	1.1997	1.11188	1.04354	0.96875
Med8	0.902969	0.975217	0.589391	0.866949	0.847347	0.617621	0.694003	0.900039	0.750081	0.713822
Grpel1	0.902369	0.999347	0.795941	1.01111	0.880339	0.879207	0.896552	0.849003	0.708012	0.966879
Zfp637	0.90221	0.88674	0.781581	0.935276	0.897006	0.909478	1.14431	1.27917	1.09566	1.23268
Ankra2	0.902053	0.856848	0.896167	1.1291	0.903558	0.459761	1.08205	0.901018	1.30179	1.15584
Lrfn5	0.901894	0.148101	0.525573	0.185861	0.79573	0.0471029	0.392081	0.387627	0.355205	0.355833
Rbbp7	0.901766	0.969887	0.655963	0.959686	0.738889	1.85127	0.759184	1.08541	0.823969	1.0227
Ola1	0.90173	1.05166	0.872817	0.941145	0.884728	1.32153	0.639684	0.708545	0.915319	0.827667
Ubap2l	0.901258	1.06101	0.957327	1.41002	0.944867	1.33061	1.08082	0.993644	1.08706	0.889702
Pspc1	0.901001	0.831674	0.604613	0.757993	0.703079	0.668157	0.93013	0.904013	1.09724	1.32432
Mrps23	0.898392	0.818579	0.693673	0.719015	1.10586	0.584301	0.643746	0.62004	0.826589	1.11736
Cltc	0.897331	0.856319	1.07339	0.890743	0.985761	1.21972	0.947724	0.950845	0.693199	0.793152
Pdhb	0.89706	0.799111	0.591037	0.807383	0.875941	0.612829	0.765439	1.10221	0.924666	0.397072
Rnf114	0.896732	0.65878	0.501466	0.483164	1.13081	0.393532	0.88153	0.955443	0.567557	0.894757
Gnai3	0.896715	1.22305	0.972622	1.0571	1.16517	1.06718	0.9659	0.976186	1.16344	0.868432
Fam78b	0.896345	0.510693	0.431976	0.240566	1.06622	0.0984334	0.298325	0.264376	0.279517	0.158174
Tomm70a	0.893643	0.81836	0.861539	0.937875	0.966922	0.62675	0.909961	0.836367	0.851325	0.86387
Rnf208	0.893632	0.673352	0.853813	0.582291	0.955691	0.10474	0.783237	0.974585	0.84316	0.73446
Cxxc4	0.893431	1.14421	0.985773	1.09099	0.657505	0.554011	1.44384	1.47891	0.916791	1.02598
Gm11808	0.89292	0.89853	1.12291	0.93776	0.829056	1.15143	0.888844	0.729243	0.487397	0.785942
Fam168b	0.892764	0.905582	0.924539	1.00505	0.809269	0.614634	1.15607	1.30492	1.16035	1.22041
Tnik	0.89266	0.540053	0.711992	0.73231	0.786831	0.137936	1.33395	0.883088	0.92086	0.58755
Knop1	0.891497	0.898558	0.745312	1.0439	0.896313	0.894877	0.889243	0.888308	0.718807	1.05537
Lasp1	0.891041	0.942261	1.06982	0.961348	0.879871	0.670333	0.728525	0.885336	0.792889	0.566833
Srsf4	0.89081	0.873046	0.592736	1.13559	0.970721	0.676379	1.57719	1.49499	1.17736	1.34588
Acd	0.890715	0.913525	0.845118	1.03227	0.934367	0.79673	0.850748	0.915259	0.809969	0.93871
Eif2s1	0.889678	0.842393	0.542116	0.688994	0.673671	0.843087	0.684071	0.927932	0.488717	0.961623
Usf2	0.889413	0.722249	0.932313	1.13867	0.901911	0.880105	0.946179	1.03282	1.14819	0.862386
Trafd1	0.889295	0.66973	0.547949	0.901836	0.678655	0.398116	0.947968	0.852027	1.14765	1.4139
Gm8730	0.889238	0.91192	1.50429	0.935536	0.790212	1.73109	0.702895	0.835361	0.796243	0.716871
Mpped2	0.888415	4.44921	5.20493	3.60231	1.02108	1.74665	2.94663	3.05752	6.03753	4.26604
Tpgs1	0.887598	0.528073	0.649817	0.802698	0.739227	0.715613	0.916989	0.770686	0.928433	1.05438
Ssr1	0.887029	0.749898	0.617465	0.850244	0.98712	1.6934	0.809405	0.748266	0.706892	0.668026
Fbxo21	0.886996	0.970257	0.961885	0.703066	0.930497	0.369371	0.912178	1.08818	0.92379	0.828553
Clptm1l	0.886576	0.760653	0.811156	0.740657	0.897261	1.09437	0.861154	0.841689	0.780511	1.50116
Prr7	0.886517	0.639841	0.500037	1.02892	0.798069	0.267656	1.07083	1.03469	1.3288	1.06637
1500009L16Rik	0.886349	0.804424	0.694239	0.465299	0.970995	1.41289	0.617373	0.299383	0.685005	0.738553
Sqstm1	0.884378	0.818243	0.658021	0.988635	0.854282	0.831708	0.942086	0.749067	1.14842	0.949079
Glul	0.883175	0.53584	0.358865	0.582947	0.737148	1.14287	0.78944	0.523914	0.40365	0.469247
Becn1	0.882631	0.770547	0.875261	0.68248	0.921124	0.814788	0.730352	0.75798	0.839114	0.589677
Tmem2	0.882548	0.386937	0.382596	0.424887	1.28293	0.313898	0.491333	0.486256	0.547211	0.523342
Ormdl1	0.881416	0.509128	0.411472	0.490529	0.920524	0.367184	0.641139	0.400277	0.658558	0.789299
Ccnl2	0.88104	0.928742	0.783155	1.39215	0.792573	0.885389	1.17928	1.25944	1.08959	1.2392
[truncated: 16,252 more rows]

## Sheet: E15.5
Figure 4-Source Data 1 (corresponding to Figure4 and Figure4-figure supplement 1). Average gene expression [exp(logNormalized counts)-1)] obtained from the Seurat analysis of each
subcluster unique to the six developmental stages
Gene expression data are sorted based on highest to lowest for subcluster E15.5-1 starting with Malat1
E15.5 SubCluster:	E15.5-1	E15.5-2	E15.5-3	E15.5-4	E15.5-5	E15.5-6	E15.5-7	E15.5-8	E15.5-9	E15.5-10	E15.5-11	E15.5-12
Gene
Malat1	251.237	189.968	199.926	233.221	231.141	125.408	222.478	135.561	219.673	160.405	138.658	117.506
mt-Atp6	97.7862	87.6963	89.4922	88.6306	97.4111	96.2124	93.7549	73.7674	86.5545	79.3522	92.1354	78.9886
mt-Co3	77.0231	64.0812	67.1347	66.82	74.1969	71.413	74.3282	59.2201	66.422	62.9497	68.7031	62.7331
Tmsb10	71.4542	88.408	71.9198	99.3977	66.8411	108.863	85.8522	39.2498	91.1984	99.7788	120.846	12.9528
Tuba1a	68.4913	134.232	78.9031	172.296	69.99	115.611	66.8158	28.3354	157.773	165.962	194.195	9.18773
Tmsb4x	61.1734	59.608	54.0272	55.1915	34.1998	53.2268	22.666	36.125	49.1999	44.5984	55.02	286.995
Nnat	59.6945	128.439	64.1776	102.996	90.4415	144.499	55.59	34.5184	66.9741	190.003	80.0031	15.148
Eef1a1	59.5576	61.8299	61.6948	49.7957	66.962	81.2213	70.7025	79.6662	52.5278	52.7724	50.4417	54.0748
Ubb	57.8895	49.8968	57.5161	50.242	62.7732	48.8384	62.0925	43.8168	48.0185	55.8215	46.445	19.633
Meg3	57.6486	43.5857	43.5629	43.2701	35.415	40.8174	46.4237	28.0308	69.255	37.1764	59.4685	5.6427
mt-Nd1	50.6378	48.6099	49.5025	42.0386	48.503	49.8903	44.7034	38.9831	42.4378	43.7162	47.1318	48.431
mt-Cytb	49.3527	42.9102	44.8233	43.6979	48.4974	45.7955	47.4953	39.9486	45.1208	40.7747	49.7608	36.3118
mt-Co1	49.2393	40.0301	43.7467	40.3503	48.5174	46.2858	43.1517	46.3347	38.2688	38.5698	35.2009	53.9739
Stmn1	49.1879	70.4635	51.7017	95.5313	61.4921	74.7438	61.7786	13.8047	67.6986	73.7813	82.9162	10.1841
Ftl1	48.8906	47.3149	36.7903	47.4907	40.1703	43.7613	43.1403	49.9692	40.1524	37.8291	49.7216	245.92
Ptma	45.4486	45.6007	45.6766	56.0194	48.6363	37.1773	56.6939	28.5315	44.2862	38.0539	44.6356	16.2695
Actb	45.0631	51.6684	42.0844	49.1802	29.5555	36.4415	37.7119	27.8704	45.0262	45.47	42.5517	51.7377
H3f3b	45.0454	32.7746	32.1042	36.5319	47.745	22.786	36.8229	22.462	29.2559	31.5053	26.5988	16.399
Rpl41	43.4657	38.2933	40.716	33.5243	39.9029	49.9207	43.1876	59.2739	34.1795	38.3203	40.7765	48.7644
Tubb2b	40.752	67.2306	47.2603	84.7856	38.9402	75.6564	49.5769	13.5937	84.7062	78.6974	88.1009	5.31892
Tubb5	37.9331	62.1022	43.7921	64.6916	42.8603	56.2935	45.9679	19.9807	56.2579	48.504	66.915	12.4874
H3f3a	36.7704	35.3882	34.5309	37.2405	41.5125	27.1495	40.5938	23.5065	31.6064	31.8558	29.2265	13.164
mt-Co2	35.4284	32.3707	30.9611	31.4369	34.3984	33.2665	33.8526	28.5264	31.5466	29.7816	31.6184	31.6641
Hspa8	35.3545	35.3805	39.6143	30.4653	32.4179	32.8691	38.2052	19.0298	31.5476	27.7786	32.1715	20.6383
Rtn1	34.5088	43.4411	40.8977	46.5358	38.8877	53.0432	36.4412	16.6234	54.5034	55.4117	52.2319	15.0311
Actg1	33.9318	51.0961	35.5952	59.3856	33.6153	48.0293	39.7758	28.561	50.6039	52.6071	56.5681	33.3818
Rps14	30.9652	24.3466	28.4173	16.8738	28.0531	29.4375	33.8532	36.0426	15.5356	16.5526	14.7987	32.3612
Rpl37a	28.5395	24.5117	30.4865	19.7515	27.6332	31.7979	32.791	36.065	19.1486	21.1279	20.5844	35.4964
Tpt1	28.4657	20.0915	23.3511	16.2335	23.6748	20.4217	24.2884	35.1264	16.2026	16.8464	13.4941	29.5321
Marcksl1	28.1909	27.7543	23.7502	29.9054	28.9795	26.1524	29.9146	12.8704	26.561	24.1319	26.6917	3.87806
mt-Nd4	27.5863	24.2595	24.197	25.1159	27.4703	26.0175	27.1104	24.8914	25.7139	24.396	25.5125	23.7026
Hsp90ab1	27.0775	26.7997	29.1192	19.5088	26.1306	25.5997	31.9571	20.8172	21.0876	18.482	20.3819	13.7837
Rps27	26.6761	21.2258	25.446	15.291	27.8411	26.2861	30.7333	40.2823	13.9878	15.8144	14.7066	31.1713
Rpl13a	25.913	22.6922	25.1166	16.8332	26.4798	30.1739	27.5218	43.7261	17.127	17.7121	16.4283	40.8777
Rps29	25.0288	24.3369	26.4938	22.1101	27.6187	30.4261	25.8599	43.6978	21.4755	23.2996	25.1721	67.009
Ndn	24.8055	18.4287	23.2967	11.2622	17.3258	11.3787	24.1849	4.17296	11.8648	10.0796	9.84436	1.28647
Rpl32	24.6172	24.4562	26.8982	17.3436	24.188	33.5373	30.6988	31.4619	16.782	18.4716	15.823	36.8473
Rpl13	24.5296	23.9662	26.4189	21.0065	22.9753	31.018	27.396	39.8817	20.1953	21.4944	20.6115	31.2207
Pcsk1n	23.9267	18.2617	27.671	14.1595	41.3474	26.4797	23.6607	3.53794	13.8985	20.5927	16.4348	1.52854
Ppia	23.8362	32.4776	33.3597	26.7622	24.1363	33.0483	21.7988	29.8316	30.6366	32.1856	31.2585	23.5099
Rps19	23.0167	22.5305	23.0028	17.1089	23.4458	29.8589	24.8969	29.7878	17.9798	14.6523	19.3983	36.2778
Dlk1	22.9797	5.21772	7.84064	1.31164	1.73789	1.7469	17.6462	9.56238	0.850455	0.429001	4.11731	0.945549
Rps5	22.2711	19.5887	22.7975	16.6948	22.4648	28.4548	28.8236	31.1394	18.6029	15.8137	18.2913	26.2926
Rps27a	22.139	21.632	24.8623	16.8719	23.9352	28.0034	25.7269	36.786	16.8153	17.074	17.1787	36.2061
Gnas	21.9811	19.1361	20.33	17.8714	17.9219	17.5898	16.2229	20.8202	21.3488	15.4376	17.6097	12.6568
Rpl9	21.9296	20.6324	23.0214	15.3694	20.6965	25.4854	24.5905	29.2507	14.8446	16.8376	16.699	24.1203
Rpl18a	21.7883	19.9175	21.5108	16.2154	22.4398	25.9099	24.7161	33.0029	16.2148	15.9586	14.8223	36.8441
Rps7	21.7646	21.7543	23.3294	18.1775	23.0351	31.9051	27.5851	27.438	17.3474	20.9347	16.8988	21.3177
Rpl10	21.6551	24.1101	25.1781	19.2948	26.1696	36.4258	24.2906	33.8164	17.6924	20.4345	20.7809	34.2136
Eif1	21.5343	21.8763	19.448	16.8377	19.3341	16.8517	19.57	16.8573	14.8465	16.425	15.7073	11.6835
Rpl37	21.3385	20.1702	24.1594	16.3092	22.5501	28.1669	25.8009	24.8483	15.9532	16.2887	16.1364	24.7939
Tubb3	21.2528	36.3718	25.9075	43.0608	25.3212	30.489	25.3445	2.76097	34.339	33.7299	35.0155	3.23508
Bex2	21.1964	14.2702	22.6583	11.8098	20.3777	13.7291	17.1121	2.91517	11.8765	13.0041	12.3408	1.90678
Rpl11	21.0786	22.1512	22.9333	17.4551	21.5619	26.3994	23.6195	25.4645	15.4489	16.6754	17.1555	25.732
Rps8	20.9275	21.4481	23.6097	17.3287	21.2185	29.6594	25.1277	35.9145	18.235	18.312	18.6014	29.7111
Rps24	20.8495	19.8203	21.7362	16.7766	19.1953	26.7413	23.2974	27.9625	14.4396	18.653	16.5038	26.6771
Rps23	20.3442	19.8719	20.9612	16.4465	22.2946	24.7404	24.6447	30.3419	14.0292	15.8458	15.6013	29.8553
Rpl35a	20.3269	15.5407	18.7036	12.0171	19.0206	18.2423	22.1238	24.2738	10.9556	13.0691	10.4819	25.344
Rps18	20.0664	19.2597	21.3131	14.6695	18.7268	25.9784	24.0831	32.9283	14.9086	15.0764	15.0754	25.7602
Fau	19.8539	17.6888	19.6224	14.78	20.8984	23.0431	22.0558	25.9198	14.9878	15.4051	16.4476	39.2174
Rpl6	19.6855	19.4887	22.5807	16.4912	20.7686	26.3392	22.6603	25.6621	15.3518	18.1004	18.1198	23.134
Rpl26	19.5238	18.1983	19.3005	15.6329	18.5064	24.3428	21.8149	27.0933	13.4623	15.9754	15.2786	27.9187
Rps15a	19.4879	20.0927	19.918	15.5503	17.934	24.6585	19.6229	31.2253	15.0343	14.1497	15.484	27.2536
Rps4x	19.2028	18.1514	19.1843	15.1342	17.1085	24.9135	23.0404	35.6256	15.6464	15.2049	14.5205	26.4545
Rplp2	19.184	18.2175	20.2918	14.9694	19.4135	22.5429	21.914	26.7048	13.7007	14.2204	15.8088	29.9296
Rpl17	18.9935	17.7843	19.4423	15.0183	18.4833	25.8967	22.1597	28.12	15.1967	16.1998	14.7148	24.2206
Rpl19	18.9793	18.3856	19.9087	15.8946	19.1184	23.4445	20.4199	23.3176	15.6276	16.5846	17.6621	25.1682
Eef2	18.92	20.1895	20.1078	18.392	21.6031	28.2264	22.7481	15.7824	20.2466	19.4078	16.0866	13.7163
Rps28	18.8959	15.0502	18.0304	11.548	17.791	20.2056	20.0378	22.4757	11.3884	11.2981	11.0726	23.5282
Rps3	18.693	17.9162	18.5284	13.4635	17.0397	23.1385	19.8472	26.1853	14.7402	13.4409	14.1623	25.8327
Rps2	18.6003	20.3635	19.1799	15.37	16.4494	23.0205	21.8095	28.2043	16.9256	13.7571	16.3826	28.3064
Rpl38	18.5808	21.0431	19.3919	16.9819	18.9639	27.8958	22.0905	22.1586	16.6961	17.6568	17.2149	20.5095
Rpl23	18.5681	19.3396	19.4443	15.0577	18.9676	27.6209	21.5136	31.5111	15.9082	16.5343	15.9531	28.7615
Calm2	18.4298	20.6295	25.7022	15.2232	22.4843	26.6107	20.7602	6.26565	21.3755	15.7167	16.592	10.5957
Rpl8	18.3643	18.6401	19.3303	14.0358	16.6256	21.447	20.5554	25.508	13.9078	13.8022	14.3231	19.9466
Rpl39	18.3364	17.5592	19.3741	15.8877	18.3885	25.7538	20.6125	33.4174	16.1608	17.8971	17.7356	31.4469
Cfl1	18.213	22.7823	19.7701	23.9392	18.5999	20.7436	19.5626	11.7731	21.3902	20.8596	22.8761	27.5192
Rps16	18.0561	16.5346	18.7101	12.8502	18.7932	21.5973	20.5295	27.2474	13.032	13.3254	13.8614	27.1399
Rps11	17.9448	18.1184	17.4014	14.3587	19.9901	23.105	20.8908	27.2461	12.0674	14.2359	14.0364	37.7969
Rpl21	17.9006	18.0527	19.3666	15.3001	18.7745	24.4378	20.5783	26.9633	15.7297	15.2399	15.0532	25.1098
Rps9	17.8235	16.9553	17.7672	13.539	19.2491	18.1229	19.6148	27.563	13.6117	13.5723	14.5933	27.0294
Rpl24	17.4913	15.4709	18.5283	13.3944	17.5966	20.776	21.3709	20.8368	11.3535	14.2234	13.1716	14.2141
Rpl14	17.4893	18.3988	19.7983	15.515	19.7516	24.0931	18.8297	27.1166	14.8549	15.5796	17.2404	23.3886
Rpl3	17.4656	17.1894	18.8377	14.2525	18.1497	20.9536	18.1974	26.6569	16.3945	13.8793	15.4695	21.2264
Rps13	17.1896	15.9551	17.9561	13.2203	16.7453	18.9083	18.7093	22.6282	13.2367	13.3926	14.5027	17.9181
Rpl34	17.1633	16.0873	16.6416	11.6042	17.1842	19.2199	19.9984	23.4422	10.5498	13.8232	11.7802	19.1749
Rps3a1	16.8256	17.5982	18.0931	13.3039	17.1444	23.4789	19.4298	28.4435	11.8527	12.2071	12.3755	20.299
Rpl4	16.6925	14.5345	19.2364	11.8971	18.2345	19.5974	21.076	21.4864	12.8868	12.1863	11.7682	15.7043
Rplp0	16.6643	16.8663	17.2395	16.9237	19.5191	28.7953	18.8665	38.0699	18.2042	15.3445	16.455	29.7879
Rpl36	16.5936	15.8342	17.2381	12.137	15.2946	18.8752	18.6113	17.6492	11.7745	12.7134	11.859	13.7658
Rps15	16.5428	14.1942	16.8257	11.9565	15.8791	19.0679	17.9907	23.262	12.0795	13.6455	11.2602	18.1947
Rpl27a	16.4688	15.1869	16.1673	12.257	16.5181	19.4439	17.259	22.4681	12.1625	13.2002	13.5798	24.4686
Rps6	16.4371	15.9403	18.2022	13.596	16.6731	22.165	19.2324	22.4579	12.1418	14.7782	13.5345	23.4894
Chchd2	15.9489	13.3215	15.5738	10.1635	15.3281	10.5295	16.7791	10.0462	10.0354	10.8138	9.27709	7.53149
Rps17	15.8792	15.3949	16.1792	11.746	14.6797	19.4396	17.2969	20.2608	10.6155	13.3577	13.6058	15.505
Rpl31	15.8683	15.8941	16.5229	12.7963	15.4644	21.0904	18.13	22.4874	13.3083	14.0802	14.6392	17.7082
Sumo2	15.739	16.2323	16.1296	15.6361	17.1788	12.6979	15.3742	10.9181	13.0645	14.8813	13.7412	5.63967
Rpl29	15.7157	15.5228	16.2451	10.7363	14.6009	20.1008	16.5576	18.4018	12.4391	11.2454	13.5871	18.3412
Sox11	15.2222	20.0465	7.36435	17.2423	16.1233	11.5051	12.7449	3.93269	10.3949	13.3873	11.4613	2.166
Rpl7	14.5011	14.5634	15.2184	12.9636	14.4442	18.7495	17.964	22.527	12.4905	12.9333	11.7423	15.751
Xist	14.4807	10.9329	13.0013	14.3084	16.3906	8.24546	14.8566	15.0354	11.9101	10.6142	7.40057	10.0854
Hnrnpk	14.47	10.7912	9.77228	9.86679	13.1636	6.3582	14.1392	7.75406	8.86133	8.50749	8.56462	4.79266
Prdx2	14.4489	17.7753	12.6118	15.5645	15.3451	17.0137	14.5833	8.16863	13.3458	16.0379	13.9447	3.92524
Hn1	14.3612	15.7195	10.8953	16.7304	11.0011	14.8114	14.7805	4.50317	15.4483	13.0594	19.2233	3.31682
Ngfrap1	14.0635	10.676	13.83	7.4004	12.937	10.6103	12.3586	5.28662	8.80892	9.79646	8.6031	1.99901
Tbca	13.7167	5.47628	6.16091	5.00524	5.43513	5.69914	5.18853	3.48729	4.96041	4.88361	5.7573	3.03172
Ybx1	13.6967	16.4498	15.2201	16.9665	14.2567	15.49	15.0003	10.5062	16.2316	18.0544	21.1034	7.86055
Ly6h	13.5551	9.30335	14.1073	10.0259	14.1005	11.877	13.4311	2.11646	14.9703	10.5708	11.4686	0.73379
Rplp1	13.491	15.1549	12.8145	12.8765	12.6931	19.4286	12.501	38.1598	12.3336	13.9031	16.0546	33.6299
Rps10	13.4494	14.4359	13.2728	10.9673	11.9551	16.7357	14.7678	19.2246	10.6562	11.4659	11.256	18.112
Stmn3	13.4325	18.9475	16.3852	16.5326	15.5422	21.026	14.6163	2.2509	17.5599	23.1272	21.2754	1.83904
Stmn2	13.3001	31.3238	24.6354	27.2019	24.3603	35.5149	17.7879	2.05474	27.5212	30.6149	36.5437	2.23984
Rpl35	13.2111	14.8484	14.2929	12.1275	12.6792	19.6403	15.8972	18.0171	12.1226	12.0445	13.8749	18.5039
Atpif1	13.0621	14.2777	13.9418	12.9948	12.126	15.8769	13.5205	7.10732	10.9657	14.2918	15.4181	6.46175
Rpl18	13.0535	11.4018	13.2801	10.0107	13.5264	15.7647	13.9298	16.7796	10.7727	9.07402	9.7055	15.4879
Rpsa	12.877	14.0394	14.3746	12.5525	13.4309	18.2906	15.2063	18.1757	14.381	10.9178	14.3921	16.174
Cox7c	12.8055	10.8061	12.9105	11.0097	13.4389	12.6741	15.0829	9.03804	11.5252	11.8484	12.1967	7.51972
Rps26	12.7689	13.3754	13.6686	11.3574	13.9151	21.0529	14.5971	18.7405	10.8796	11.8181	13.965	13.3475
mt-Nd2	12.6932	11.1894	12.1887	11.6277	12.7051	12.0622	13.388	11.1848	11.1982	11.7687	12.2971	10.7112
Rps25	12.6428	11.9843	13.8526	9.94276	13.2624	14.7854	14.1724	17.4468	9.88062	9.93205	10.8571	19.96
Ywhae	12.6283	15.7659	14.5229	15.6717	12.854	13.5474	13.1705	8.88866	14.0694	16.099	16.5698	5.61701
Rpl23a	12.6228	11.7145	11.7123	10.6591	12.4463	16.2354	13.857	18.6037	10.7251	10.4239	10.2582	12.9823
Otp	12.5888	0.249914	0.239099	0.37605	0.268835	0.214838	0.381989	0.250051	0.182063	0.0998574	0.23761	0.089768
Sepw1	12.5627	16.735	14.227	15.9285	12.3627	20.5472	10.6791	11.2996	17.2135	17.1008	19.2955	3.71073
Eef1g	12.4676	13.3194	12.9408	9.82346	10.9481	17.4757	14.5323	11.2123	10.5648	10.1145	11.1487	6.84823
Cox4i1	12.4349	13.303	12.9286	12.9635	13.1636	15.9993	12.5873	13.9152	12.8689	15.9402	14.4832	12.8633
Map1b	12.2596	20.0579	15.7889	22.5838	12.3259	19.7664	12.7883	2.82522	18.5494	22.974	23.8352	2.16704
Cd24a	12.1878	13.6737	6.54519	23.4284	8.64446	15.0436	21.3809	2.48277	17.0155	11.3971	18.2692	0.988648
Hmgn1	12.1708	8.67033	9.40768	8.72688	9.93233	5.22262	12.487	7.7499	7.20568	6.37635	6.38258	3.40163
Rpl28	12.0712	11.1133	12.2376	10.6051	11.064	13.5998	12.3501	21.988	10.0713	10.0906	11.1038	18.0797
Fth1	11.6316	9.85861	10.7841	9.53025	11.8076	10.6815	9.42338	23.019	10.8447	9.52623	10.2764	62.3809
Rps21	11.3515	9.65605	11.1192	7.75447	12.1786	12.1944	12.2872	14.3247	8.22044	7.5485	9.64018	11.127
Gapdh	11.3234	14.1552	12.3259	12.5939	10.6972	16.1592	12.3143	12.4618	13.4097	14.2661	16.6619	17.9358
Uchl1	11.266	13.7981	13.3572	16.084	11.0069	16.1218	12.6765	1.81917	15.2939	17.4731	18.4399	1.56047
Naca	11.163	10.9038	11.5574	8.72955	10.9001	12.4057	13.0893	13.2301	8.95572	9.3949	9.09701	9.81883
Rpl10a	11.0501	11.7299	11.7923	9.51675	9.57549	14.4946	12.3102	17.5412	8.82527	8.62932	9.49956	21.1646
Pgrmc1	11.031	9.51744	12.3898	9.14075	29.161	9.14189	14.3004	6.66599	7.30663	9.01399	10.1205	1.76115
Hnrnpa1	11.0187	12.6596	10.8456	11.0606	13.374	10.3853	13.2406	7.7999	8.79022	8.52282	10.268	4.29921
Gnb2	10.9179	10.8496	10.8533	9.7405	10.8253	10.5515	10.2103	6.43588	9.72413	8.25687	11.0698	5.50708
Sub1	10.8505	8.33113	12.5582	6.88977	10.2215	7.96381	11.262	6.28323	5.11186	7.31601	6.54309	4.4651
Gm1673	10.8105	8.91537	10.9127	11.2778	11.1597	10.3517	11.5093	3.35253	12.3905	10.9095	10.65	2.68586
Ptov1	10.8089	10.0438	10.6909	8.25508	9.71694	7.57082	11.2852	6.93675	6.81621	6.57767	6.97065	2.21543
Rpl7a	10.7587	10.8473	10.8614	9.42009	10.8794	12.1406	13.0153	11.9428	8.23271	9.17482	8.61404	13.056
Tceb2	10.7417	10.5029	12.4673	9.26323	10.8729	10.3114	10.1215	8.58488	9.55703	11.0845	10.7565	4.62813
6330403K07Rik	10.7313	8.68013	9.90156	10.9642	12.9125	9.86064	12.7763	2.74313	8.63469	9.40416	8.70196	0.953472
Oaz1	10.5667	9.00849	9.87965	8.21305	10.4114	7.06639	9.66577	11.8038	7.48965	7.89339	8.114	14.0812
Mllt11	10.5567	12.9376	9.90189	16.6005	10.7567	15.107	12.2438	1.07691	14.2875	16.5858	16.2619	1.00692
Cox8a	10.4646	10.5454	11.4226	10.2265	10.6882	12.0882	10.5523	10.5936	8.6118	12.4925	11.222	9.08962
Hsp90aa1	10.4	11.2886	11.5043	11.4718	10.0101	8.85619	12.9945	5.59016	11.211	11.9898	11.678	3.65482
Rpl30	10.3399	9.13822	10.5446	7.95289	10.5533	10.3939	11.4612	13.0573	6.78551	7.4129	8.13166	11.8676
Rps20	10.2665	10.506	10.7906	8.34192	9.92534	13.1338	11.2577	20.588	8.20054	7.7983	9.01035	16.9466
Rpl27	10.2257	9.40337	9.14942	7.18512	9.44276	9.84209	10.5793	8.43616	6.35599	7.29829	6.92695	8.68344
Ttc3	10.1402	11.8322	12.0363	10.2559	11.1358	10.1756	10.3917	3.43804	9.87212	11.5504	10.1456	1.62626
Basp1	10.0692	11.9086	10.9387	16.8232	11.1494	12.0131	11.9701	2.79856	17.2051	10.796	16.5669	3.65142
Ptms	10.0528	11.4851	9.10915	13.4383	10.7872	12.7832	9.47653	4.59053	13.3791	14.9602	10.3717	4.64787
Atp5e	9.93958	9.49787	9.62245	8.86718	9.12692	10.0845	8.66888	10.1461	8.8987	8.22233	9.84682	7.58051
Eif4g2	9.92203	11.1175	8.50142	11.4845	8.99922	8.28939	8.43971	6.09631	10.1291	11.0228	11.6122	3.17467
Slc25a4	9.8827	12.1194	11.7695	10.862	10.2535	12.7392	10.329	10.4719	12.0813	12.4354	12.6961	3.78731
Hmgb1	9.78941	8.01144	7.43408	10.2303	7.46254	5.31432	9.45819	12.345	10.18	5.94922	8.23249	4.05746
H2afz	9.68559	7.82069	10.8209	9.12982	11.4129	7.58751	14.3816	15.1554	6.52426	7.48923	7.65933	9.4927
Maged1	9.67541	6.80227	8.26002	7.52996	8.96421	4.7845	8.64052	4.15017	6.96321	4.94838	5.51298	1.55399
Dynll1	9.66559	7.75957	9.10795	8.74246	8.08182	5.80463	9.51682	9.97472	7.27203	9.16976	7.53932	4.06437
Eif4a1	9.63345	14.6843	9.67585	10.6569	9.75337	9.78778	10.1423	8.05304	9.9208	8.96764	11.7255	6.87507
Rps12	9.55476	11.0829	10.0949	7.11991	9.82452	14.0279	9.54946	20.0956	7.53832	8.08493	7.89738	23.0956
Btf3	9.52663	10.475	9.55181	8.99073	10.5126	9.99623	10.361	10.1241	7.55236	7.72412	9.05083	7.689
Npm1	9.48471	10.0204	11.2453	8.38939	10.4251	8.88637	11.9563	12.6633	7.73719	7.23238	6.53663	9.4203
Gap43	9.4484	13.5728	16.3369	16.2679	7.22919	19.6775	12.1653	1.94701	19.5442	16.2022	22.403	1.70328
Ddx5	9.32273	9.80339	7.77635	9.35479	8.92922	5.66457	8.91584	5.84336	8.66447	6.97122	6.86438	6.15532
Wbp5	9.31661	5.75161	7.66787	4.72521	7.74866	4.48403	10.0075	6.19912	3.48484	3.49097	3.66548	2.51963
Cox6b1	9.26336	9.77619	10.6265	9.3251	9.61649	11.6457	9.05973	7.86157	9.10638	11.9206	11.4655	7.64779
Rpl15	9.25952	9.71291	10.2609	8.12629	9.67633	11.5929	9.94396	10.059	8.45374	8.52807	8.11424	8.48487
Pebp1	9.06772	12.2583	9.79368	12.5083	9.46374	14.2262	9.92459	7.18288	10.9089	11.8515	11.5122	2.72658
Gnb1	9.04332	9.58221	10.0882	9.48976	8.65625	9.0857	9.32625	4.20914	8.01955	10.424	6.73417	2.5629
Erh	9.04108	9.5263	9.19579	8.33679	9.64466	7.81694	9.41758	7.28307	7.9388	8.20346	8.08222	3.15047
Nme1	8.90405	10.2319	9.22881	9.94203	8.08916	9.9633	10.825	3.00022	8.85114	8.98426	11.3836	3.18076
Nap1l5	8.90313	2.4132	6.93939	2.88101	5.69259	2.54225	5.47661	0.770206	3.53186	2.32629	1.21706	0.407405
Tubb2a	8.78131	11.8375	12.8024	14.976	7.74573	12.743	9.36519	1.95385	18.964	14.3929	17.6908	2.30891
Cited1	8.74851	0.349484	3.36752	0.311243	1.66213	0.410371	11.5778	0.495367	0.256686	0.160405	0.0344261	0.116478
Hint1	8.65183	10.7722	10.5576	9.16111	9.49312	11.6392	9.63189	5.93829	10.7724	10.0069	10.4363	6.6485
Calm1	8.65022	12.592	12.9644	11.7235	8.70357	12.7162	7.65544	7.36823	14.2474	10.0879	11.6094	7.47703
Sox4	8.6421	11.7976	5.8431	16.7707	8.96552	10.7127	13.7701	3.67326	7.91629	7.33878	10.2004	1.92304
Ywhaq	8.57655	11.018	9.34319	11.438	8.2846	10.6192	9.3137	5.17165	11.0674	11.9151	11.4594	2.49159
Hist3h2ba	8.3154	6.78244	4.63498	9.2787	7.36591	6.30522	8.65893	1.58575	5.93561	6.43916	4.8246	0.511096
Atp5l	8.28114	8.09444	8.42568	7.25913	8.21754	8.54122	8.1965	5.96211	7.06113	8.64214	7.54864	6.09087
Atp5b	8.16819	10.524	9.1955	8.49689	8.15296	7.10905	8.27475	8.57752	10.618	9.66083	9.91886	4.72698
Cnih2	8.11773	4.54681	7.18043	8.37161	8.13834	6.46959	8.23273	1.14921	8.36148	9.07317	8.24307	0.436955
Fxyd6	8.10368	7.32462	12.3497	8.20613	9.33665	9.82336	9.21856	2.63369	9.22048	7.39634	6.7318	0.740037
Usmg5	8.06871	7.53147	8.75035	6.67397	7.88854	8.3934	7.96734	4.0755	6.16626	7.14942	7.36345	3.10196
Cirbp	7.95928	6.72124	7.17322	7.44747	7.43269	5.46683	8.00272	2.21456	7.18737	6.05639	6.41752	1.19741
Cox6c	7.938	8.99338	9.12338	8.42083	8.83928	10.234	7.36028	9.81312	9.26074	10.8427	10.0767	6.20806
Atxn7l3b	7.85766	7.54284	7.45866	6.96941	7.67786	6.36818	8.40502	3.91403	7.05656	5.86814	5.24867	1.94901
Sec61g	7.8343	8.76291	8.45996	7.56748	8.98057	9.29117	8.08461	8.75683	5.37667	7.31266	7.20707	5.87948
Sst	7.77956	0.0590795	0.0436721	0.15713	0.334528	0.103254	0.0483586	0.049765	0.00702571	0.328842	0.0395582	0.092115
Pfdn5	7.77774	6.32653	7.80573	6.19415	9.02617	7.50105	8.20575	6.55699	6.42964	6.39528	6.39778	6.92828
Dnaja1	7.75381	7.85323	7.53204	7.15247	7.41122	5.54329	7.61516	3.78181	7.46442	6.99257	6.64353	1.8212
Rpl22l1	7.73599	7.16729	8.21504	5.88017	6.40808	7.44421	7.21709	11.5093	6.08737	5.21801	8.29594	6.50495
Cox7a2	7.72787	7.63649	8.56571	7.81948	8.42253	9.18592	8.89572	4.64802	6.79427	9.82768	8.57197	3.47273
Morf4l1	7.68131	7.64987	9.02671	8.20864	8.0974	7.27206	8.64846	6.34266	6.57061	9.19956	8.02282	3.86893
Srsf3	7.58489	8.99062	7.62229	7.31392	7.29709	5.053	7.4853	6.13479	6.46508	5.46724	6.60385	2.42364
Atp5j2	7.50012	7.97858	7.85892	6.70159	7.57121	8.69517	7.36001	6.08508	5.91154	7.68741	8.11277	4.74875
Slc25a5	7.49683	13.5986	10.9774	2.45627	6.94032	2.77593	5.43624	5.39243	2.8812	2.70962	3.65191	8.68652
Hnrnpa2b1	7.48993	8.56695	7.66979	7.26306	7.9453	4.62406	8.1803	7.05353	7.25138	6.47036	6.37293	4.01708
Jund	7.4872	5.2407	5.31601	3.81305	5.78545	4.6554	6.35208	3.79137	4.8764	3.96882	3.6972	2.86839
Eif3f	7.25298	6.79138	7.27241	5.37642	7.84685	9.61282	8.4538	8.26773	5.31915	5.79614	4.80008	6.41505
Isl1	7.22875	4.07946	5.51574	0.690915	0.601877	3.31793	3.55714	0.236343	0.118211	0.248014	0.155807	0.39032
Pfn2	7.21857	9.19484	9.01937	9.34555	6.66851	8.74148	6.89421	2.72248	9.19643	11.875	12.5529	0.787301
Dpysl2	7.17446	10.709	8.92538	9.56638	7.87967	10.5788	6.53042	2.59668	9.3398	8.79654	9.08333	3.39683
Hap1	7.16227	4.27782	6.04641	2.01183	5.83342	4.12458	6.70221	0.817903	2.21537	2.37846	1.35063	0.413115
Morf4l2	7.15665	6.89535	6.51376	4.86066	5.72907	6.48487	6.27092	4.9107	3.88571	4.75858	5.4211	1.18264
Ncam1	7.14831	7.5003	9.94029	9.21728	6.91127	7.35219	6.829	1.59509	8.02771	9.94495	8.76368	0.931301
Tma7	7.09435	5.97731	7.35676	6.1684	6.58948	6.47679	6.75613	4.92005	5.00525	6.28156	6.22153	3.72494
Stmn4	7.0836	7.06675	5.63025	10.1048	4.2781	10.4199	8.81928	0.944832	8.89429	9.77557	10.0457	0.58967
Eif4a2	7.06026	6.66166	8.77972	7.57288	9.20908	8.79202	8.36955	5.11298	7.73823	8.19342	6.5745	2.49382
Tsc22d1	7.04472	5.78191	7.43135	8.29932	6.43626	5.15675	8.18312	5.84233	7.80269	9.0141	8.09698	1.05946
Marcks	7.02031	7.58935	6.71713	8.19206	6.39164	6.66064	6.76905	7.1525	7.14345	7.8427	8.35353	11.2376
Snrpg	6.93669	5.70728	6.31601	4.9746	7.10548	5.19216	8.09287	4.96005	3.53179	3.93286	4.43051	2.58642
Mif	6.93444	11.2937	7.49449	10.0272	7.57207	12.92	7.77964	5.72359	8.40185	9.37647	10.506	8.42306
Gnb2l1	6.86127	6.60105	7.50441	5.60979	7.20173	8.50719	9.70079	9.21393	5.56827	5.39515	5.77649	9.12666
Rpl12	6.82626	7.05886	7.11646	5.98223	5.9584	9.21877	7.34617	11.167	5.56614	5.14949	5.19439	13.2014
Ndufa4	6.77458	7.57406	9.09164	8.80816	8.43239	9.9617	7.54493	6.29732	9.62306	9.41594	8.83368	4.32927
Atp5g2	6.75637	5.35165	6.76201	3.96136	6.82587	5.09842	6.3427	7.18844	3.47952	5.09585	3.10881	7.50481
Dynlrb1	6.66583	7.05286	7.11605	6.28605	6.65568	7.27307	5.78701	4.03347	6.18085	6.84212	6.65017	2.29592
Atp5j	6.65655	6.32655	7.202	6.11838	6.84623	6.95399	6.84346	6.05784	5.79629	6.46873	6.3608	3.57574
Cox5b	6.64566	6.71813	7.67601	6.22494	6.87774	7.87812	6.4658	5.3281	6.35842	7.84464	7.88393	4.61713
Psma7	6.60893	7.21302	7.24502	5.98516	6.83508	5.5003	6.94861	3.60088	4.90381	5.82163	5.34869	3.00209
Snrpn	6.59094	7.39483	8.56832	9.75314	8.03746	10.9324	6.49881	1.42668	10.6228	12.7037	8.83626	0.898982
Ywhah	6.58961	6.65491	7.80625	7.04331	5.90491	6.94045	6.20633	2.77571	7.58843	7.6017	8.403	3.72838
Gng3	6.53568	4.74055	6.55296	5.75878	6.74274	6.70946	6.11993	0.704661	5.72274	7.62187	6.12321	0.545742
Rbm39	6.53036	5.32323	5.24326	4.9451	6.20835	3.38694	6.12187	5.02628	4.70778	3.98218	2.9906	2.80732
Atp5h	6.51603	6.188	7.11202	6.4879	6.39536	6.6517	6.15445	7.11897	5.93767	6.73545	6.77423	4.90346
Rnf187	6.49987	7.33178	6.98578	7.88605	6.45089	7.51576	6.71477	2.94259	7.66174	9.0608	8.58871	1.19381
Eef1b2	6.45327	6.41378	6.87618	5.22044	5.79219	8.53089	5.91382	6.09038	4.74518	5.39727	6.45415	4.98276
Eif5a	6.45286	7.9092	6.17072	6.58803	5.80091	7.03914	5.48527	6.52388	6.12962	6.82966	7.09011	5.95637
Nsg1	6.43143	8.56637	6.27783	12.1644	6.12682	10.4559	7.07467	1.48499	12.074	11.2914	13.1061	0.632304
Cdc42	6.4244	7.70517	7.37838	7.88404	6.65827	7.77913	6.47627	6.29373	7.63183	8.76487	9.70678	7.87944
Hmgb3	6.32575	10.4822	6.32966	7.00522	7.46822	8.38261	8.34655	2.82625	6.20113	5.95245	5.67919	0.612274
Uqcrh	6.32537	5.98559	6.55259	5.50173	6.95683	7.25689	6.39324	7.50787	5.44496	6.64934	6.41995	4.99626
Clta	6.32373	5.95185	6.88809	5.87475	6.72509	6.11622	7.77487	4.76027	5.98296	5.70741	6.02557	20.7751
Rpl36a	6.24076	7.25526	7.08976	6.86792	7.22852	10.6934	7.57163	15.3786	8.18642	6.98541	6.90909	10.5897
Cox6a1	6.22227	8.54345	7.38865	7.59547	6.24842	9.5296	5.32517	5.03856	8.08264	10.2241	9.96069	5.0643
Peg3	6.18689	3.39877	6.60905	1.52809	3.78329	2.90187	5.28239	1.8862	1.59094	0.952838	1.16614	0.746618
Mrfap1	6.14465	4.15215	5.33091	4.09942	5.32414	3.88706	5.52469	7.15576	3.11358	4.56494	3.42811	3.36255
Npy	6.0501	0.110779	0.144523	0.128898	0.158811	0.118143	0.254162	0.140033	0.113614	0.0485261	0.571493	0.0210347
Ubc	6.02374	5.53095	5.23054	5.22732	4.76538	2.83659	6.2128	5.09148	5.7217	4.39089	6.19614	7.91455
Pfn1	6.00971	6.94252	5.71897	5.24571	5.61997	6.68983	4.56589	11.5772	4.16395	5.48539	5.28479	19.9629
Atp6v1g1	5.93718	6.7098	6.86031	5.71949	7.74373	6.23335	6.00362	3.24696	5.1833	6.52724	5.36085	5.29593
Myl6	5.89143	5.49559	6.78222	5.56867	6.26385	7.33133	5.37651	7.2213	4.95618	7.74148	6.7447	8.93054
Atp5a1	5.85444	6.0259	6.03397	5.21884	6.18947	5.3576	5.9082	5.75271	6.34424	5.54288	6.13882	2.93472
Tagln3	5.84608	4.48894	5.11571	5.31589	4.81437	4.11613	6.80788	0.549604	4.9875	4.18112	4.07121	0.444124
Rbx1	5.81567	5.5377	5.84652	4.43117	5.47414	4.07935	4.86215	4.83314	4.2834	4.45849	4.46212	2.89939
Pkm	5.80875	6.89029	4.78145	5.64167	5.05845	4.31142	6.45077	4.18441	4.91263	5.62169	6.19054	8.20035
Rpl5	5.74426	6.19879	6.44619	5.05247	5.58013	7.38395	5.89969	8.62094	5.24398	5.38877	5.55463	8.06121
Tomm20	5.74087	4.99274	5.93449	3.94331	4.94582	3.97228	5.01687	3.50978	4.0201	3.77062	3.64848	3.15014
Atp5f1	5.73066	6.61343	6.26066	6.6764	5.83308	5.9812	6.23	4.52254	6.31039	6.88596	7.25686	4.62084
Zwint	5.72844	4.99995	5.83875	5.03755	5.47487	4.75066	5.09292	2.31384	5.62571	6.10576	4.50623	1.20743
Map1lc3a	5.72814	4.91799	6.04023	5.43486	5.00108	7.41255	5.37487	3.65518	7.18333	7.7771	6.98843	1.40382
Peg10	5.71739	1.23875	3.94103	0.832004	2.02432	0.760104	3.38245	0.579465	0.2133	0.208472	0.8055	0.619253
Hsbp1	5.68539	6.05303	6.10104	6.02326	5.43645	7.01861	4.54279	3.87157	6.85076	7.39688	8.04708	3.14505
Tecr	5.67792	5.72726	7.26772	6.99592	5.54906	6.07067	5.91989	3.33295	7.97994	7.02718	7.70317	1.74754
Selk	5.62194	5.5305	5.80962	4.75412	5.32591	4.89148	4.85057	4.24429	5.04989	5.44401	4.99608	2.77672
Gabarapl2	5.59862	4.81097	5.29558	4.83913	6.08975	4.91451	5.67353	2.74871	5.09386	5.07745	4.40727	2.05919
Fabp5	5.55422	12.0423	9.61971	10.2765	6.34126	12.9755	7.79193	12.2596	11.1796	11.0506	13.2133	9.80631
Atp5k	5.52243	5.2143	5.44971	5.79748	5.75167	5.88296	4.9034	4.51298	5.12239	6.47307	6.22087	2.88046
Shfm1	5.52056	5.18632	5.65839	3.81213	6.32234	3.52967	4.80739	6.61689	3.74731	3.45036	3.6625	4.3362
Uqcrb	5.43687	4.46371	5.83009	4.38764	5.16448	5.08741	5.97555	4.62016	4.15893	5.17736	5.5254	3.74515
Ran	5.39292	7.10854	6.73699	6.45512	5.81582	5.95754	5.86779	6.94534	5.88745	6.07514	6.17452	4.47962
Sumo1	5.37256	4.72457	5.09466	4.36929	5.72019	3.98524	5.12761	3.57526	3.48213	3.9828	3.07354	2.41858
Bex1	5.36588	4.16904	5.8362	4.28084	5.22179	6.00798	6.00631	1.16449	4.39836	5.15217	4.20234	0.420291
Pomc	5.34259	20.8472	37.0554	1.67613	3.33864	17.9102	2.48384	1.39825	2.04547	1.10554	1.03206	2.9887
Gsk3b	5.3222	6.03206	5.39808	5.64013	5.2797	4.67719	5.22428	2.51037	5.50924	6.05706	4.4586	1.36848
Rpl36al	5.31736	5.14087	6.16582	4.47011	5.42964	5.89792	5.13803	4.96731	4.48577	4.35256	4.2599	5.69652
Eif3h	5.31591	4.87097	5.70393	4.52114	6.29513	6.27844	6.99242	5.46992	4.98754	4.59061	4.77861	4.33726
Gabarap	5.3108	5.53739	5.1586	5.90116	7.28193	5.42999	4.91063	7.85887	5.88222	7.09103	5.72397	11.2773
Cdk4	5.28942	5.67824	3.59387	3.97727	4.76991	3.93763	4.6806	5.58282	2.41552	2.44844	2.43453	1.89531
Ap2m1	5.28568	6.58149	6.25255	6.405	5.36638	6.49292	5.34478	3.69643	6.30713	7.49624	6.34485	3.98357
Calm3	5.27556	9.00619	6.59983	7.44738	6.03067	9.62289	4.85772	3.73792	9.01074	8.52358	8.0423	3.02664
Arf5	5.27472	6.17696	5.16632	5.60811	4.7111	6.35842	4.71737	5.56095	6.16852	6.17848	5.62368	2.40566
Ubl5	5.27152	5.57354	5.57515	4.84714	5.6041	5.66903	4.23807	4.38213	5.08703	6.02683	4.68806	5.04995
Ndufa7	5.24379	4.40705	5.59649	4.35324	5.49075	5.20788	4.97272	5.0165	3.90632	5.0773	3.77751	3.62604
Rsrp1	5.24298	4.58356	4.64745	4.14312	4.21253	2.9719	4.42907	4.44012	3.93819	3.08761	3.0747	3.27629
Prmt1	5.22723	5.97212	5.50212	5.95191	5.33355	5.28361	6.64014	2.74223	5.13393	5.42111	5.98016	1.10801
Aplp1	5.18248	4.86188	4.67553	6.51334	4.99665	4.29519	5.06441	0.893006	8.45589	5.18926	7.4561	0.469466
Ctbp1	5.15495	5.5619	4.63653	4.95482	4.63876	4.37842	4.5499	2.80888	4.99329	4.55668	4.39328	1.51362
Pcbp2	5.13305	4.32275	4.67687	3.63051	5.37028	3.69615	5.30211	5.64031	2.98436	3.75962	2.48074	3.23366
Hmgn2	5.12907	2.83619	4.10426	3.25488	5.2001	2.03883	4.69414	6.12771	3.45223	3.16337	3.20201	1.93279
Slc25a3	5.07112	5.57379	5.15718	4.7822	4.8507	5.47649	4.92638	6.39676	5.05069	6.20847	6.03291	5.4794
Dnajb6	5.05655	4.52719	5.1288	4.97993	4.97305	4.4953	5.93115	1.60764	5.7223	4.86276	4.59989	1.46592
Gpx4	5.04416	4.59299	5.08995	4.83753	5.03047	4.76967	3.74607	6.02152	5.09372	5.89216	4.53123	6.28164
Ube2b	5.02279	3.36726	4.46204	2.82498	4.44604	2.95697	4.41921	2.62804	2.4177	2.34971	2.90513	1.32165
Celf4	5.00808	3.5309	4.72613	7.67558	4.59459	4.35335	5.43133	0.654361	8.64085	5.58468	5.33131	0.51403
Psmb6	4.99631	4.78558	4.68849	4.4905	4.62298	4.17811	4.02719	4.47044	4.39966	4.74747	5.26067	3.6001
Swi5	4.98622	4.78354	5.53664	4.78109	4.7972	5.01676	4.99869	4.84303	4.86947	5.13757	5.05563	2.22764
Cox7a2l	4.95956	3.93192	5.24421	3.91007	6.11118	6.43532	6.08106	5.39426	3.9943	4.34695	3.47349	5.19332
Atp5g1	4.94087	4.74786	5.37075	5.42634	4.30199	5.8358	5.27946	3.72922	5.34495	5.46077	7.23012	4.11544
Dynll2	4.92746	4.47635	4.4674	4.36299	4.58697	4.29834	4.051	1.29557	4.81044	4.30186	4.19767	1.66921
Ndufa3	4.92328	4.30465	5.4515	3.84838	4.94397	4.73903	3.91984	5.19119	4.12402	4.6294	4.41068	3.16288
Elavl3	4.91571	6.45061	4.31673	5.87556	5.03679	5.11667	4.53483	0.714254	5.6319	5.80798	5.61359	0.566789
Akr1a1	4.90266	5.48262	5.37212	3.75884	4.55787	5.63929	5.24285	4.87422	3.26773	3.95218	4.75016	9.37782
Eif1b	4.89865	4.00537	4.97445	4.88857	5.34783	4.36259	5.18292	2.68954	3.57559	4.33521	4.16946	1.91695
Snrpe	4.85395	5.40503	4.58644	4.56698	6.01581	4.63225	5.39646	4.62451	3.70127	4.36941	4.32545	3.86126
Srsf2	4.82897	5.60458	4.69735	4.73038	4.16021	3.17963	4.94207	4.25432	4.69169	3.86921	4.33339	2.05887
Fkbp1a	4.80393	5.42925	5.91831	4.80641	4.50633	6.02456	4.93688	3.88659	4.45443	4.84375	6.15043	2.78305
Cbx3	4.78556	4.31281	4.20104	4.32709	3.64503	2.86622	4.49529	2.95774	3.22933	3.62064	3.25627	0.85768
Mapt	4.71005	9.39815	7.14961	11.9002	5.46784	11.6787	6.34683	0.826663	13.2465	11.5979	13.2514	0.860386
Minos1	4.69123	4.90183	5.27294	3.08992	4.91885	4.51639	4.51328	4.98699	2.80051	3.66126	3.10689	3.68303
Ina	4.68561	7.84432	3.17301	9.08109	5.6278	10.1541	5.53392	0.738356	7.70064	17.244	10.3674	0.834362
Atp5c1	4.67667	5.4787	5.14576	4.89916	5.20585	5.0371	5.43804	5.05438	5.25632	5.057	5.22771	4.12376
Myeov2	4.64966	4.34982	4.8051	3.78422	4.24389	4.94964	4.74671	2.94849	4.01557	4.14546	4.31839	3.58637
Ube2s	4.64451	4.43865	3.99976	4.53497	3.90971	3.60206	4.11368	4.76034	4.19522	3.76213	3.92397	2.26531
Atp5g3	4.64438	5.00201	5.26963	5.01479	4.92793	5.41672	4.88727	3.90974	5.23816	6.54233	4.86885	2.81259
Cox5a	4.62583	5.83573	4.6753	6.77244	4.5762	6.65308	4.4421	2.99123	6.23463	7.58741	6.91569	4.93745
Cxx1a	4.61984	3.72903	4.39857	3.90731	4.48593	4.34075	4.9704	1.9106	3.68784	4.10408	3.49619	0.525757
2010107E04Rik	4.61739	4.9132	5.15717	4.97153	5.02214	6.56083	4.67378	4.27665	4.79637	6.55329	5.51261	3.00901
Hspe1	4.6103	4.39841	5.59702	3.38007	4.37633	4.74345	5.42913	4.36439	3.49649	3.5638	3.7394	3.92538
Ppdpf	4.60981	4.12719	3.51122	4.01946	4.40291	3.66134	4.16	2.56967	3.47841	3.68878	2.91256	1.09843
Pafah1b3	4.59482	6.41239	5.17855	6.35182	5.27679	6.34571	5.24014	1.97255	5.82546	7.12334	6.64465	0.860114
Pfdn2	4.52382	3.84687	4.50962	3.75006	4.45557	3.78196	4.52514	1.82703	3.25776	3.44705	3.41841	1.74227
Ndufa2	4.51137	3.8531	4.34296	3.50717	4.10814	3.97001	4.16952	4.75632	3.20679	3.96012	3.48459	5.03446
Romo1	4.50813	3.42595	5.28062	3.18814	4.97906	4.06923	4.37292	3.37044	3.29407	3.62563	3.31457	1.92319
Ndufc2	4.48372	4.55753	5.0743	3.95837	4.52724	5.05889	4.52572	4.62648	4.40722	4.81084	3.95384	2.53323
Tuba1b	4.47024	7.56126	7.67245	7.33891	4.86488	6.94786	4.59079	8.33303	8.65266	7.22062	11.2568	6.50408
Atp6v1f	4.46943	3.14346	4.19726	3.21312	4.46253	4.1174	4.28667	2.49754	2.97798	4.08675	3.50998	4.5945
Dbn1	4.46355	4.37552	3.83445	4.7457	3.6822	2.77674	4.69989	1.46127	4.84407	3.69287	3.89148	0.458274
Uqcrq	4.46335	4.63466	4.58651	4.37845	4.39882	4.71729	3.55165	3.90276	4.84054	5.67436	4.86223	4.3129
Thra	4.45608	6.78653	4.08496	5.96942	4.55394	5.35883	5.28151	2.37313	5.81399	4.48708	5.28244	0.388017
Rtn3	4.45379	6.09765	5.49166	5.75324	4.45406	5.45131	4.48967	3.51424	5.70505	7.70984	6.31996	2.43154
Crmp1	4.45338	6.43225	4.74713	7.82675	4.69968	6.79096	5.30486	0.568497	6.29828	6.6146	7.22976	0.744149
Fkbp4	4.44511	4.06615	4.2647	3.32538	3.24636	2.62689	4.51004	2.25023	2.98014	2.5339	3.23085	0.72725
Uqcr11	4.4369	4.73201	5.17502	3.92475	4.1566	4.74263	3.86314	4.50236	4.08277	5.20509	4.83396	3.39079
Ndufb5	4.41691	3.84106	4.3677	3.3696	4.83922	4.55507	4.83027	3.77217	3.21328	4.08289	2.63172	2.14505
Ube2d3	4.36931	4.86101	4.61959	3.79216	4.49657	4.1739	4.12697	4.17753	3.31366	3.56854	3.85701	4.44316
Ndufv3	4.35319	3.54058	4.25673	3.22951	3.3401	4.3586	3.44693	3.23056	3.27399	3.95323	3.93796	3.73085
Bri3	4.33437	4.32942	3.53024	2.94911	4.72042	4.05399	4.50064	2.15288	2.26861	3.09309	2.61353	4.67193
Smdt1	4.33108	4.60085	4.51708	3.47535	4.06677	4.01711	3.95889	2.8443	3.213	4.1725	3.84026	2.95765
Paip2	4.3275	3.71182	5.40064	4.41382	5.35559	4.04102	4.7955	2.41942	2.87289	5.15052	3.53629	1.71568
Tspan3	4.31701	3.94794	4.39574	3.89689	3.80135	3.19975	4.42473	4.324	4.40845	3.65259	3.32299	1.60487
Serbp1	4.31257	5.3656	4.80699	4.98099	4.28221	4.35444	4.9731	4.07419	5.48996	5.17087	4.63256	2.8225
Cct7	4.28547	4.61276	4.72306	3.84967	3.49892	3.02607	5.13826	1.90824	3.7453	4.01076	3.78724	1.3245
Mlf2	4.27783	3.63652	3.97799	4.43073	3.75058	4.18829	3.67535	3.22592	4.24485	4.81392	4.33105	2.11022
Ctxn1	4.27657	3.31968	3.97404	3.61971	4.41102	3.41563	4.63005	1.1429	3.84182	3.20786	3.32851	0.372143
Ap2s1	4.27372	4.3858	4.54246	4.56166	4.32996	4.95141	4.52061	2.6786	5.38784	5.0325	5.38449	3.28594
Atp6v0b	4.26936	3.83123	4.71994	4.67829	4.49226	4.17738	3.80912	1.492	4.62021	4.9166	4.495	5.96863
Atp5d	4.23913	4.01659	4.26938	4.23121	4.08612	4.39879	3.74877	5.58124	5.36859	4.78635	4.73666	4.43613
Serf2	4.2276	5.54684	4.08632	5.48076	3.75748	5.00211	2.96849	12.446	4.50774	4.78019	4.61098	13.2094
Snrpf	4.20705	3.29393	3.66734	2.80305	4.42727	2.76005	4.33139	3.24048	2.73386	2.2949	2.88291	2.48288
Fscn1	4.19389	6.05972	4.05203	5.34372	4.33563	4.44147	3.87516	2.94731	3.95282	4.50029	4.69595	1.16565
Hdac2	4.18434	4.88315	3.55577	4.74362	4.15459	3.60712	4.94997	2.0482	4.11474	3.97976	3.89614	0.548301
Bsg	4.17574	3.93807	4.59305	4.20886	4.29029	4.44339	3.96221	8.11853	4.69187	4.42629	3.97641	5.16519
Mtch1	4.17423	4.89157	3.62015	4.84711	3.80535	5.87673	3.76182	3.65091	4.56574	5.09709	5.20958	1.44661
Snrpd1	4.16949	4.10871	4.27594	3.51938	4.62578	3.23308	4.47481	2.6078	3.3267	2.91595	2.99209	1.5877
Rab11b	4.16547	4.11467	4.18299	4.225	3.85516	3.70989	4.66998	2.30103	4.36838	3.78595	4.28632	1.76677
Ndufa6	4.16479	2.80037	4.16132	2.99931	3.99288	3.81904	3.97498	2.91132	2.68539	3.1216	2.1496	2.46016
Nono	4.15862	4.08841	3.41757	3.76506	4.09099	3.44273	4.65579	2.96154	2.77959	3.25608	3.64163	1.6615
Ywhab	4.14218	4.43782	4.88041	4.26512	4.33573	4.50258	3.95742	2.01562	3.89477	4.94482	4.07012	2.14495
Ndufa13	4.13489	3.36574	3.98838	3.7645	3.8979	3.87003	3.20164	5.6851	3.5954	4.86514	4.18252	3.29295
Hnrnpa3	4.13281	4.81002	4.17685	3.78422	4.12156	2.84581	4.09206	3.87915	3.05584	3.97316	3.66939	3.03579
Fez1	4.13034	4.45364	3.92938	4.23395	4.05793	4.17439	4.62439	2.11193	4.28725	3.78074	4.61302	0.208336
Rpl22	4.12614	4.85644	3.96849	4.09147	4.10589	5.18354	3.90136	8.27198	3.85152	3.6509	4.054	9.71434
Nedd8	4.11836	4.37422	4.29282	4.99328	3.73687	4.43165	3.50257	4.6869	5.01538	4.71312	4.74517	3.58518
Gdi1	4.08895	5.01804	4.48088	4.40026	4.54574	3.70553	3.9047	1.14948	4.92282	5.58164	5.01055	0.579461
Cpe	4.08647	4.62013	4.85567	6.17418	3.94743	5.04438	4.60492	1.89152	6.76191	7.70611	7.32274	0.453325
Cox7b	4.04974	4.07835	4.98142	4.54615	4.52215	5.30237	3.75621	3.47624	4.60933	5.15424	5.59592	2.75483
Ahi1	4.04735	1.88826	4.34637	2.7393	5.12689	2.42701	4.88787	0.57489	2.87412	1.73644	1.63771	0.650624
Psma3	4.04405	4.69155	4.24333	4.47284	3.64293	3.54277	4.3211	3.40134	4.02881	4.35939	4.41684	2.43237
Rab3a	4.03805	4.55418	4.49496	4.81849	3.68653	5.69677	4.36224	0.653328	5.67604	5.65314	5.27106	0.0549239
Dstn	4.03515	5.73143	4.24261	4.35715	3.71129	4.44183	4.03762	3.01078	4.87513	5.0186	3.66123	2.08211
Cnbp	4.01578	3.28942	4.2871	2.52847	3.64382	2.55048	4.08827	4.82163	2.25937	2.52954	2.44186	2.02221
Rab2a	4.01504	4.42769	4.3771	5.04415	3.87037	3.79839	4.29179	2.8385	5.47773	4.31731	4.75891	2.09054
Snrpd2	4.01174	3.82322	4.45657	4.50035	4.51806	3.99603	4.33237	4.14504	3.6167	3.88275	4.20148	2.14501
Prkar1a	4.01144	2.77757	3.34352	2.67456	3.15947	2.40172	3.64489	2.08756	2.71556	3.08026	2.4407	2.09107
Ndufb9	4.00553	4.06742	4.52074	4.32194	4.11632	4.0945	3.9459	3.41024	4.7825	4.78205	4.29707	2.11061
Arf1	3.98663	4.09365	3.99099	4.40121	3.77396	3.52422	4.09967	3.38587	4.73807	4.63369	4.11039	4.00851
1110004F10Rik	3.97696	4.29942	4.76561	4.07019	4.26057	3.30523	4.93248	2.7199	3.86842	3.93538	3.97101	1.2684
Sf3b6	3.96471	3.77623	4.2257	2.95358	3.89498	2.91845	3.71181	2.48092	2.8919	3.02299	2.99511	1.83866
Ube2d2a	3.95291	4.38599	3.99779	4.51231	3.93294	3.66403	3.65892	3.20934	4.36516	4.43723	3.70094	3.39233
Ndufs5	3.93158	3.68759	4.54164	3.85294	4.06879	4.47185	3.64951	2.66898	4.23957	4.613	4.73205	1.7929
Srp14	3.92656	3.21262	3.91718	3.36098	3.72267	3.9972	3.32722	3.05898	3.87916	3.89179	3.21402	3.29631
Ndufb11	3.90932	3.1399	4.21264	2.87207	3.62444	2.98333	3.15996	3.98304	3.10919	3.43951	3.11173	1.94263
Arpc1a	3.90247	4.03453	4.28637	4.39254	4.44709	4.72158	4.83648	2.20659	3.49187	4.30351	4.30642	1.83509
Elavl4	3.89413	5.4433	5.77363	3.59567	3.4174	3.97943	2.96183	0.49739	3.43464	6.31737	3.76634	0.79265
Ywhaz	3.88765	4.09069	4.3643	3.26334	4.13239	3.85851	3.66671	1.72932	3.6145	3.5549	3.63791	1.74224
Matr3	3.87255	3.91972	4.29555	4.0718	4.55814	3.39366	4.41767	1.73572	4.37858	3.6597	3.66805	0.942271
Serf1	3.87148	5.17059	4.85083	6.32661	6.14357	8.23863	5.56467	1.80828	5.18458	7.11461	6.41536	1.2009
Ppp1ca	3.87049	4.28423	4.23042	3.35205	3.2683	3.99384	3.192	3.7445	3.07681	3.32107	3.50504	4.34733
Vapa	3.86812	4.05092	4.62514	4.20626	3.81111	3.73949	4.43684	2.69912	4.43424	4.31869	4.36476	2.64889
Ywhag	3.85984	4.96257	4.51269	4.86931	3.83255	5.62351	4.20306	1.33979	4.58496	6.28712	6.15924	1.38634
Ranbp1	3.85898	4.81091	3.99025	4.55219	3.41116	4.07428	4.06671	4.18053	4.30572	4.29215	5.0465	2.29356
Psmb2	3.85402	3.77011	4.12159	3.34475	3.65628	2.9823	3.89711	3.20115	3.20423	3.41333	3.20916	1.95207
Kif5c	3.8414	3.59809	3.34605	3.73361	2.56179	3.74716	3.61049	0.449617	4.07683	2.70021	3.82533	0.399694
Dad1	3.83043	2.7343	3.77533	3.12813	3.69251	3.28282	3.40175	4.30329	3.18716	3.25685	5.12506	2.43513
Fis1	3.81178	3.37805	3.51039	3.75482	3.63649	3.26879	3.53887	2.92534	3.88589	3.49312	4.3377	2.89826
Six6	3.80354	4.12431	2.38069	0.172508	0.555406	1.16698	0.801957	0.460976	0.0735405	0.11025	0.0326144	0.179798
Map2	3.80264	2.02614	2.70699	3.44945	4.16611	2.41876	3.77753	0.668434	3.86982	3.58364	3.83775	0.350952
Sbk1	3.79739	4.48686	2.79822	4.77078	3.75197	3.75796	3.45792	0.796809	4.95004	4.63366	4.3809	0.955072
Hnrnpc	3.78934	3.16571	3.41677	2.75805	3.64256	2.35724	3.71051	2.97103	2.9307	2.62844	2.51788	1.76481
Dpysl3	3.75346	7.36687	3.97964	9.11365	4.55544	7.26178	5.09961	1.23926	8.10502	9.5163	10.8927	0.904335
2700060E02Rik	3.74657	3.6174	3.61085	3.69628	4.16988	4.18908	4.18656	3.98032	2.78001	3.34333	2.96622	3.55783
Zcchc12	3.73058	2.32219	5.15191	6.01559	6.28399	2.8758	6.65671	0.550274	4.93181	5.04719	5.16254	0.264044
Klhdc8b	3.72639	2.1302	2.64578	1.04693	2.76925	1.27145	2.91465	0.727499	0.482832	1.54854	0.295623	0.370572
Resp18	3.70397	1.02102	3.15269	2.24042	3.8047	2.28702	3.38201	0.187476	2.61357	3.3155	1.80338	0.0940705
Srsf5	3.67587	3.19944	3.18176	2.61842	3.23341	2.01207	3.52832	3.45133	2.81593	2.53959	2.16141	2.12009
Magel2	3.67218	3.10776	1.96814	0.460272	2.21618	1.52261	2.53454	0.454177	0.442381	0.22506	0.156818	0.363191
Pou2f2	3.65887	1.49517	4.61996	1.99573	7.51103	3.34378	7.6222	0.562981	0.867325	3.4211	0.526373	2.15665
mt-Nd3	3.65176	3.25367	3.52992	3.41029	3.61791	3.28454	3.86959	2.70553	3.02266	2.60913	2.97327	2.25018
Rbm3	3.64745	6.26931	3.80564	4.69609	3.50678	4.63754	3.30246	7.14807	4.7511	4.12195	4.91631	4.80455
Set	3.64048	4.1232	3.72137	4.61569	3.22074	3.44865	3.74984	3.09513	3.87409	3.59747	3.70016	1.39192
Txn1	3.62982	4.46958	3.96244	3.03062	3.18383	3.8656	3.56462	4.41659	2.79548	4.27996	3.35275	3.74974
Klc1	3.62146	4.70375	4.0076	4.12572	3.64279	4.93874	4.35589	1.26649	4.98713	6.41792	4.30272	0.433676
Cct5	3.61873	4.00091	4.17716	3.80495	3.45566	3.76648	4.52656	3.14969	3.95938	3.92564	4.1438	1.59904
Psmb3	3.61369	3.6344	3.51995	3.20439	3.31695	2.76997	3.13239	2.8503	2.89751	2.91034	3.24504	3.01078
Ndufab1	3.60854	3.30309	3.9673	3.23129	3.32508	3.33662	3.51068	2.48555	3.10807	3.81236	3.61534	2.28807
Evl	3.60787	4.90609	4.05672	6.30266	3.83788	5.67796	4.58001	1.22815	6.34381	6.1296	6.91804	2.12185
Ndufc1	3.60485	3.37502	3.55617	3.34594	3.59548	3.4258	3.39342	2.74115	3.22934	4.36948	3.44989	2.49737
Hnrnpdl	3.60324	4.47927	3.30116	4.03282	3.54167	2.37553	3.36451	3.26471	4.11705	3.02601	3.34459	1.92367
Cfl2	3.60218	4.18203	4.1341	3.40763	3.49504	3.92292	3.58226	1.87493	3.38494	3.35424	3.60757	0.287281
Mdh2	3.56447	3.92505	3.87079	3.61406	3.44659	3.30154	3.90421	2.4574	3.42352	4.38453	3.51765	1.90639
Pabpc1	3.55782	2.80965	3.462	2.81689	3.44288	4.35129	3.85599	4.88507	3.26749	2.91044	3.04862	6.84091
Ube2e3	3.55685	3.61794	3.2309	3.90862	3.50606	3.3666	3.46772	2.72373	3.96613	8.83981	2.39744	1.38504
Srrm2	3.54464	3.02933	3.06798	2.86864	2.92675	2.324	3.35347	2.82767	2.73744	2.61332	2.28028	1.87791
Eif5	3.53096	3.24051	2.76064	3.06744	3.0199	2.30816	3.57891	2.27716	2.90556	2.36458	3.28195	2.20073
Psmb5	3.53008	3.49018	3.77367	3.51747	3.45897	3.10372	3.97467	2.87289	3.55234	3.42775	3.65533	2.19258
Hnrnpab	3.51887	4.31719	3.14794	3.98034	3.66531	2.76984	3.93395	2.41695	2.81666	3.34845	3.32615	1.70739
Psmb4	3.51733	3.18198	3.37201	2.54278	3.47293	2.83094	3.35048	2.7185	2.50803	2.53242	2.61822	2.1114
Pcbp1	3.51719	3.27672	3.33839	2.98325	3.45201	2.89376	3.18268	3.92361	2.68785	2.89578	2.22652	1.98766
Ube3a	3.50299	2.55135	3.69051	3.21199	3.60271	2.68591	3.39144	1.37278	3.95917	3.7541	2.26635	0.919716
Tomm7	3.49964	2.73343	3.54799	2.60273	3.5849	3.10813	3.8997	3.20608	2.17389	2.96153	2.63549	2.9713
H2afv	3.49351	2.63339	2.34727	2.7974	3.5659	1.75295	2.83339	6.83762	1.71521	2.5644	1.46252	0.964364
Atxn10	3.49341	3.68921	4.1244	3.88677	4.11636	2.99082	3.95983	3.10907	4.16718	4.46315	4.84891	1.92379
2310036O22Rik	3.484	3.0122	3.22921	2.96393	3.38079	2.88593	3.5383	2.13887	2.74276	3.23446	2.8211	2.0991
Snhg11	3.47151	1.98498	5.9273	6.93939	4.32902	8.08959	1.86823	0.990224	14.5017	9.49405	5.95756	0.776465
Dctn3	3.4495	2.97742	3.09948	3.07554	3.66692	3.31321	3.81531	1.7511	3.05939	3.81592	3.86527	0.906091
Fus	3.44784	3.23626	3.27887	3.23156	3.1009	2.30687	3.34187	3.10926	3.75547	3.0622	3.39273	1.68289
Psmb1	3.44253	3.28252	4.23078	3.91406	3.91555	3.88127	3.52104	3.78515	3.36609	3.81914	3.91649	3.31807
Rnf7	3.43998	3.26123	3.71134	3.2286	4.01067	3.68288	3.44893	3.93988	2.88625	3.69068	3.54064	3.61243
Ndufb8	3.43521	3.18469	3.69738	3.68848	3.00094	4.09218	3.0308	2.80711	3.53328	5.12418	5.01055	2.44178
Sdhb	3.42967	3.35761	3.58122	3.38091	3.08935	3.21801	2.73272	2.02207	3.18744	3.67404	3.82525	2.21916
Zdbf2	3.42862	1.28596	2.11449	1.23769	3.03866	1.31497	3.93569	0.469985	0.645011	0.772346	0.719999	0.643966
Bax	3.416	3.36343	3.19969	3.35877	3.24123	2.86398	3.17828	2.50897	3.30796	2.93419	3.22374	2.98882
Timm13	3.41334	3.10104	3.0741	2.9484	3.4558	3.10228	3.47518	3.25459	3.1507	3.58486	3.40166	2.62287
Pomp	3.41215	3.31837	3.37412	3.2995	3.13996	3.42268	3.50354	2.59796	3.47705	3.59822	3.69306	4.51168
Ntm	3.41099	0.606983	1.61096	2.74815	1.62526	0.845207	0.915607	2.44055	1.91094	1.58379	1.24132	0.226556
Rab14	3.39803	3.33595	3.44732	3.15634	3.08658	2.96206	3.76093	2.02857	2.96572	3.17189	2.9052	3.15045
Ndufb7	3.39773	3.35443	3.22529	2.81001	2.82599	3.41654	2.86957	2.86937	2.90736	3.60631	3.44231	2.80079
Podxl2	3.39084	3.6169	2.925	4.8881	3.30171	3.71685	4.14142	1.23051	6.61119	4.09345	4.0029	0.278906
Timm8b	3.38223	3.17116	3.67151	3.18697	3.64436	3.15888	3.30651	2.02089	3.22432	3.81382	3.6244	1.16856
Arpc2	3.38161	3.91931	3.92983	3.79029	3.34537	3.53595	3.93574	2.6788	3.29241	3.35476	3.77193	8.20874
Tra2b	3.37294	3.45414	2.85688	2.81045	2.89781	1.80044	3.28286	2.2738	2.4902	1.85318	2.47408	2.00444
Edf1	3.37103	3.04377	3.2286	3.19713	3.32978	3.03452	2.58348	3.05668	2.85011	3.40451	3.81615	2.49926
Eif3e	3.37052	3.38748	3.62958	3.11933	4.33617	3.93284	4.22925	3.92125	3.22329	3.10926	2.7923	1.85024
Mdh1	3.37048	2.54385	3.86712	2.83392	3.86206	2.76665	3.58134	2.55048	3.47533	4.33183	3.23207	1.66312
Uqcr10	3.36745	3.26648	3.81872	3.23256	3.3929	3.94355	3.42489	3.75657	3.50398	4.06798	3.86918	3.12561
Psmb7	3.3411	3.73359	3.69681	3.33702	3.46067	3.30745	3.38445	2.30676	3.16043	3.05133	3.38386	2.29552
Arf4	3.33673	4.70974	3.44825	4.0087	3.09154	3.41006	3.17409	4.1758	3.86163	3.71658	4.07295	1.48146
Nhp2l1	3.3364	3.05687	3.4921	2.66857	3.57609	2.99924	3.60637	2.18005	2.81721	2.44299	3.0935	1.84514
Nsg2	3.33528	3.47947	2.84851	5.83715	2.94278	3.95131	3.26652	0.581752	5.86834	5.98858	4.46454	0.369396
Eid1	3.33263	3.39832	3.54628	3.84463	3.66083	4.54529	3.80349	2.16057	4.36714	4.15903	4.43584	1.16658
Zfp706	3.32465	2.92369	3.63321	2.65971	2.98423	2.63893	3.03756	2.06265	2.91959	2.92212	3.14516	3.22349
Eif3k	3.3172	3.1956	3.69045	3.43892	4.19787	4.39988	3.99198	5.08267	3.72047	3.49181	3.83387	3.34875
H2afy2	3.30052	3.38826	2.80246	4.70017	3.63134	3.14698	4.21671	2.16278	3.963	3.42412	4.02692	0.352353
Hnrnph1	3.29864	3.60718	3.07237	3.20434	3.12321	2.34269	3.62139	1.97864	2.94997	2.70524	2.91927	1.39884
Sec61b	3.29796	3.56085	3.48372	2.89561	3.28147	2.97155	2.79752	5.06804	1.98544	3.16065	3.05934	3.89978
Caly	3.29616	1.3142	4.36357	2.33018	3.38017	2.49218	2.8726	0.293986	3.31116	2.26197	2.383	0.41483
Celf3	3.28873	2.21457	2.32671	1.84746	2.69141	1.63142	2.67307	0.273386	1.70284	1.83317	1.6291	0.311468
Son	3.28302	2.86997	2.56666	2.89701	2.81755	2.01994	2.69891	2.86706	2.96234	2.62982	2.91445	2.81427
Snrpb	3.28272	2.88014	3.01737	2.39663	2.98106	2.23667	3.24906	3.68655	2.15687	1.91396	2.57435	2.97763
Map1lc3b	3.27919	3.9413	2.92083	4.1077	3.7728	3.90105	3.13546	2.48094	4.53307	4.17925	3.99005	3.05436
Zbtb20	3.27773	4.05169	2.96031	2.33095	4.12458	1.40894	2.71956	3.48537	1.78451	1.09467	0.795847	0.709293
Mrpl52	3.26392	3.26968	3.66528	3.09427	3.74255	3.87742	3.70703	2.58011	3.16544	3.21773	3.19712	1.29082
Ptp4a1	3.26168	3.04543	3.18021	3.08685	3.30504	2.53602	3.27498	1.44089	2.95728	3.35407	3.34386	0.945802
Gdi2	3.26132	3.93304	3.82954	3.55634	2.99298	3.8701	3.58888	3.51387	3.13275	3.97505	3.97579	7.40688
Ssb	3.25993	3.09795	3.16889	3.17323	2.67789	2.20141	3.77034	2.30355	2.65952	2.83692	2.80224	0.99859
Pja1	3.25683	2.64916	2.84368	2.41243	3.68187	2.1613	2.91456	1.43144	2.05787	1.93583	1.92091	0.396928
Cct2	3.25208	3.12099	3.43863	3.3461	3.61583	3.16916	4.38735	2.21086	3.50695	3.04164	3.62031	1.98993
Rbm4b	3.24171	2.48766	2.33284	2.54885	2.70438	1.75414	3.2683	1.737	2.25007	2.04737	1.95563	0.428461
Cacybp	3.23252	2.85417	3.5211	3.25329	2.86733	2.4656	3.39156	1.63955	3.33079	2.92172	3.12077	0.939648
Top1	3.22438	2.80544	2.63082	2.98629	3.55785	2.11992	3.28615	2.35769	2.9761	2.49932	2.40091	1.55712
Efna5	3.21801	2.81076	2.34242	0.945758	2.23579	1.23537	2.40176	0.966417	0.261761	0.455009	0.560954	0.259351
Ssbp2	3.2169	2.67354	2.70061	1.76006	1.27993	1.51762	2.23051	1.55183	1.25664	0.786334	2.41239	0.983709
Psma2	3.20318	2.96406	3.31039	3.12712	3.25606	2.60697	3.28755	2.76627	2.65722	3.02001	2.85003	2.42927
Cycs	3.20138	3.82199	3.4147	3.90753	3.43399	3.37455	2.82786	1.77686	3.47113	4.39304	4.50216	1.63549
Scg5	3.19833	2.39833	3.30926	2.84176	3.37519	2.33466	3.34973	0.424015	3.02926	3.08155	3.35725	0.213536
Vdac2	3.19356	3.22073	4.08528	2.99066	3.55369	3.23745	3.61936	2.74518	2.45424	3.73969	2.72552	3.32195
Tcp1	3.18945	3.64406	3.86199	3.14899	3.45375	3.69014	4.13348	2.63895	3.17088	3.38973	3.74257	1.89019
Ndufa11	3.18802	3.16441	3.30773	3.19158	3.32823	3.35986	3.09838	2.67886	3.28618	3.63742	3.50755	1.71134
Mapre1	3.17158	3.9332	2.9875	3.38662	2.74012	2.98359	2.78138	2.10287	3.45685	3.35607	3.84154	2.17553
Uqcrfs1	3.16234	2.87122	3.51553	2.69073	3.01615	2.62602	3.10319	2.03277	2.53043	3.74748	3.0853	1.50011
Rufy3	3.16084	3.60559	3.4919	3.88806	3.1432	3.163	3.31034	0.541294	3.07584	4.43165	3.48315	0.287264
Bcas2	3.15801	2.98757	3.13318	3.52501	3.25269	2.81517	3.53735	1.85538	3.09325	3.22336	3.31249	1.27722
Gnai2	3.15733	3.24085	3.34537	1.34726	3.08249	1.83621	2.5071	4.24216	0.831142	1.45388	1.32351	6.56177
Ndufa1	3.15547	2.66211	4.01554	2.84399	2.97763	3.13335	2.73659	1.99256	3.21447	3.26863	3.5062	2.38008
Ddx39b	3.15436	2.80736	2.69256	2.41062	2.659	1.791	3.27684	2.66842	2.24466	1.98427	1.96377	1.63485
Zfos1	3.14441	2.07722	2.77253	2.16821	4.33735	4.51085	6.96604	2.86271	2.57389	2.14351	2.14329	1.43864
Gng5	3.13087	3.76776	3.18069	1.06904	3.61444	3.77777	1.76023	6.72655	0.823136	1.58305	1.82138	8.72919
Polr2m	3.11945	2.8028	2.95614	3.02352	3.23077	2.83042	3.19946	2.7067	3.05946	2.88584	2.93892	0.918229
Ndufb10	3.11901	2.71238	3.51613	2.94445	3.18376	2.68419	2.84835	2.1992	3.10249	3.60575	3.2076	1.99239
Pafah1b2	3.11795	2.74954	3.00696	2.47226	2.69523	2.21148	2.80969	1.34267	2.56321	2.70213	2.36043	0.796808
Jun	3.08926	1.24934	1.70095	1.29123	1.8316	1.47605	3.46776	5.70764	1.96989	1.15093	2.26683	3.66375
Nisch	3.08675	2.20809	2.54734	2.24764	2.91648	2.23892	3.21219	2.32972	1.93295	2.59379	1.782	1.45861
Ndufa5	3.07582	2.72126	3.36218	3.42714	2.92984	3.45524	3.13215	2.59404	3.67973	3.99578	5.28586	1.34492
Cd81	3.07399	2.10912	2.90814	2.32676	2.91576	2.85088	2.8051	10.5711	3.09146	2.60022	2.53012	12.9012
Laptm4a	3.06735	3.04353	2.98579	2.70875	2.88721	2.39789	3.12067	17.1186	2.12722	1.94915	1.78351	3.59558
Zfp428	3.06557	4.16256	3.06806	4.61334	3.24339	4.12443	3.32393	1.08144	4.5723	3.63097	5.60311	0.302426
Csnk1a1	3.0607	2.78111	2.70767	2.44707	2.97224	1.77997	2.65256	2.61916	2.41934	2.48626	2.16097	1.81407
U2af1	3.04888	3.17821	2.87336	3.10143	2.84454	2.58154	2.94611	2.56118	2.8035	2.61032	2.75006	1.61432
Srsf6	3.04279	2.84525	2.40664	2.76045	2.66557	1.66227	2.50507	2.57621	2.18713	1.5656	1.55228	1.79726
Gm10076	3.03972	2.60703	2.9681	2.10502	2.71543	3.26663	3.08416	3.76724	2.48156	2.44145	2.47777	3.57391
Rab6a	3.03271	3.82925	3.7434	3.34838	3.40691	4.50023	2.89546	1.50361	3.62305	4.37072	4.39814	0.689214
Atp5o	3.02533	4.11699	3.59886	5.24198	3.16318	4.75891	3.31516	5.21659	5.10261	6.81356	6.89722	2.09665
Vbp1	3.01938	3.03427	3.25216	2.35194	3.08518	2.95046	3.37233	1.31897	2.39174	2.7194	2.71151	0.475109
Pdcd5	3.01876	3.01642	3.13295	3.08651	2.79552	3.08522	2.9045	3.04828	2.74721	2.99945	3.37583	1.43052
Npdc1	3.01465	3.30478	3.27334	3.39047	3.25381	3.79201	3.0525	1.29738	3.23132	3.28941	4.15533	0.210191
Sfpq	2.99697	3.23055	2.43446	3.17096	2.76051	1.63234	3.04006	2.67726	2.9122	2.31094	2.75461	1.10522
Nedd4	2.99678	2.6069	2.96546	2.4852	3.27619	2.39079	2.91237	4.55037	2.2328	3.17783	1.98029	0.42737
Srsf7	2.98092	3.51521	2.9049	2.91156	2.66675	1.79505	2.84612	2.32696	2.64387	2.03573	2.68233	1.37118
Srsf11	2.98037	2.52977	2.38816	2.49096	2.75275	1.93965	2.89562	2.03324	1.93742	2.2539	1.53683	1.05303
Polr2f	2.97409	2.60673	2.92871	2.12713	2.84868	2.41193	3.44248	2.49398	2.08145	2.04476	2.26638	1.54232
Park7	2.97111	3.43084	3.45928	3.65198	3.08373	3.44061	3.3844	3.15668	3.32684	4.06372	3.51291	2.76904
Tspan13	2.96613	3.93224	4.32087	6.51654	3.29901	3.27429	3.18779	1.40477	7.24139	11.3759	8.082	1.01469
Cdk5r1	2.96566	3.56116	2.24453	3.28794	1.86097	2.52717	3.01191	0.489405	3.59406	2.80759	3.55537	0.557881
Sep15	2.96468	3.55208	4.05465	3.25334	3.04557	2.82497	2.13825	5.68106	3.96739	2.85175	3.56309	4.05359
Btf3l4	2.96215	3.00368	2.98054	2.80918	2.80797	2.65276	2.91088	2.02076	2.31823	2.48243	2.39346	1.00409
Itm2b	2.9451	1.74586	3.38852	2.69671	2.06182	1.7703	3.16046	9.12162	3.69699	3.96096	5.28318	53.3228
Pcbp4	2.9403	4.08536	2.24343	2.90756	3.18765	3.70673	2.94655	1.25276	2.2695	2.91715	2.86194	0.103085
Bex4	2.92598	2.85521	3.59524	2.82655	3.10627	3.72666	3.27018	1.00016	3.00494	3.03913	3.73911	0.471142
Ddah2	2.92263	2.93903	1.93377	4.01457	2.31716	2.04941	2.33596	3.73684	2.60607	3.49314	3.3438	0.754653
Scand1	2.92246	2.00688	2.45558	2.68951	2.82997	2.1929	2.498	2.25477	2.35157	2.49288	2.7492	1.39777
Ndufb2	2.91084	2.69498	3.19037	2.88912	2.96217	3.09954	2.75987	2.32512	3.26745	3.62035	3.70376	1.36737
Oaz2	2.90976	2.39103	2.89525	2.49425	2.62662	2.7147	2.78887	1.90076	2.75527	2.76924	3.29242	0.831173
Ube2n	2.90757	3.77916	2.89682	3.289	2.94611	2.78863	2.44092	2.59891	2.63106	3.91219	2.83709	1.56264
Tsn	2.90533	2.69881	3.06487	2.82924	3.03534	2.45511	3.12372	1.46562	2.81418	2.8459	2.78962	1.28174
Tmem59	2.90045	2.02567	2.5671	1.9895	2.73706	1.67607	2.45208	3.68354	2.13868	1.99989	2.02097	3.98835
Tsg101	2.89745	3.40781	3.08373	3.35462	2.76518	2.37152	3.14311	1.27932	3.2585	2.93639	3.27828	1.16915
Anapc5	2.89584	3.50383	2.72071	3.40654	2.84971	3.46673	2.63247	2.36631	3.47448	3.11848	3.52773	1.04841
BC031181	2.88942	2.78537	3.07441	2.84787	3.26207	2.51428	2.61698	1.7694	2.71764	3.14384	2.49209	1.24396
Tmem176b	2.88893	1.92154	2.38941	1.22589	2.18281	1.99842	2.11663	1.92691	0.648986	1.36512	0.448979	3.38703
Psip1	2.88735	3.02605	3.09411	3.74951	3.17747	2.43176	2.95144	2.25258	3.71478	4.07719	4.151	0.365282
Stub1	2.88014	2.30978	2.71851	2.46658	2.40527	1.88552	2.66	2.18505	2.70718	2.52404	2.43449	0.837216
Cxx1b	2.87691	2.30109	2.48226	2.47696	2.72405	2.74582	2.75499	0.928166	2.23661	2.32915	2.21037	0.503876
Atp1b1	2.87443	1.29247	3.97823	3.45804	1.88334	2.40498	2.33496	0.360205	2.39224	3.32259	2.50422	0.135907
Erp29	2.87399	2.83539	3.24319	2.52776	2.9951	2.67006	2.5768	3.32871	2.18559	2.23054	1.8637	7.43342
Prmt2	2.87032	3.02982	3.33502	3.27198	3.24045	3.57725	3.27932	0.987245	3.38862	3.24179	3.51856	0.480074
Zfand5	2.87005	2.44073	2.26289	2.63924	2.8046	2.32264	3.30591	1.46647	2.17258	2.87523	2.72835	1.83168
Sumo3	2.86637	2.2333	2.32266	2.3307	2.54063	2.1691	2.78958	1.71991	2.2481	1.91708	2.13444	1.31662
Cst3	2.86567	3.11586	3.73062	2.96685	3.34105	3.53748	3.0673	11.1783	2.79033	3.77928	3.18603	69.0666
Arpc5	2.86428	4.02186	3.20632	4.08637	3.24878	4.38321	2.82302	1.34478	2.84456	3.91493	4.74769	6.21485
Pea15a	2.86382	4.01108	2.63825	1.45461	2.87129	3.96797	2.83405	3.59515	1.48767	1.28374	1.04032	0.994935
Brk1	2.86246	2.83534	3.06451	2.72884	3.16551	3.18032	2.67091	2.58153	2.76287	2.8408	3.21102	4.63639
Vcp	2.85974	3.22307	2.72375	2.88844	2.16882	1.82475	2.67435	2.53585	2.52754	2.59698	3.52849	1.17639
Rps27rt	2.84173	2.00001	2.49691	1.43506	2.83089	2.73303	3.17866	3.77378	1.35001	1.4413	1.43413	3.47258
Tbcb	2.83899	3.60471	3.25549	3.16537	2.88847	3.0358	2.39216	1.66806	3.42865	3.57051	4.42867	1.62783
Ndufa12	2.83574	3.18826	3.0954	2.5929	3.02836	3.06784	2.16237	2.28568	2.54579	3.71245	2.91415	1.48362
Cct3	2.83471	3.29099	3.47012	2.58995	2.96712	2.2313	3.23582	1.93655	2.1656	2.48132	2.38307	1.58087
Fkbp3	2.83396	3.36126	3.61102	2.56757	2.9087	2.91903	2.67059	2.95677	2.80809	3.38992	2.49158	1.02104
Vdac3	2.83057	3.35367	3.47842	3.84613	2.75649	3.47259	3.1194	2.01001	3.13397	3.52129	4.21492	1.03672
Mff	2.82805	3.11654	2.95324	3.04565	2.93718	2.91314	3.19042	1.6368	3.21954	3.20793	3.4129	0.853856
Ckb	2.82499	4.37505	2.70475	6.06788	1.75106	3.68772	3.37185	9.48908	6.81906	6.8914	6.00685	10.3373
Nap1l1	2.81605	3.04896	3.13667	2.63712	2.82323	2.70244	2.76912	7.80146	3.34946	2.73338	3.60822	1.33491
Pdap1	2.80828	3.55055	3.16273	3.28649	2.98167	3.05886	2.99629	2.1765	3.67125	2.97679	3.14104	1.19145
Aes	2.80448	4.3112	1.19077	3.49184	2.91102	3.65154	3.31753	2.84589	2.57655	2.96602	3.50851	1.98727
Aldoa	2.8013	3.73164	2.74509	2.61477	2.51751	3.62785	2.60959	3.92972	3.664	3.67078	2.92158	11.3031
Mrpl20	2.79347	2.72979	2.91813	3.00854	2.78323	2.84446	2.33239	1.67822	2.77597	3.26577	3.16761	1.26014
Efnb3	2.7754	1.79096	2.48507	2.09702	2.16186	1.37742	2.3179	0.996842	1.57815	1.64855	1.15187	0.196652
Rrp1	2.77257	2.45043	2.63931	2.33251	2.50113	1.95753	2.56597	1.57213	2.42034	2.69212	2.44904	0.885416
Caprin1	2.7681	3.16514	2.44304	2.6606	2.68664	2.30408	2.58591	1.80214	2.0916	2.51919	1.88573	1.71859
Nrxn2	2.76525	2.26036	2.60829	2.85732	3.49589	2.70848	2.54576	1.1904	3.61137	3.20746	3.01255	0.371934
Ppp2ca	2.7603	2.64141	2.73037	2.59995	2.55066	2.13768	2.44525	1.89354	2.717	2.80662	3.00302	1.64705
Vamp2	2.75783	2.39137	3.34195	3.10414	3.25621	3.00712	2.77627	0.942393	3.58268	3.42343	4.02967	0.193688
Wdr6	2.75471	1.8998	2.36607	1.92643	2.60158	1.91552	2.79797	0.62031	1.38608	1.30638	1.55375	0.347666
Dcx	2.7536	2.6449	2.57793	3.90943	3.14065	3.47379	3.32718	0.569463	4.33766	3.31102	4.67846	0.396638
Six3	2.75152	4.62702	2.3497	0.506481	1.02527	2.78256	0.619694	0.999543	0.146	0.172523	0.130545	0.318242
Ube2i	2.74393	2.66344	2.4212	2.62424	2.41601	1.75598	2.39658	2.18204	1.98079	1.8592	1.8684	1.55371
Nop10	2.73514	3.03475	4.56638	2.92118	3.4707	4.02153	3.67784	2.77962	2.85602	3.00646	3.27313	1.9814
Celf2	2.73457	4.5736	2.22557	5.79081	1.5051	4.47413	1.99356	2.2473	3.5068	3.58829	4.12235	2.50981
Ncl	2.72953	3.21478	2.98392	2.93727	2.94519	2.38104	2.85169	3.08399	2.68173	2.34073	2.89417	2.56025
Ube2e1	2.72758	2.63389	2.6594	2.62352	2.89042	3.09876	3.29698	1.58126	2.54379	3.16398	2.1767	1.26278
Cetn3	2.72125	2.37752	2.93432	2.68361	2.91535	1.81789	2.53307	2.33098	2.5829	2.53385	2.80473	1.6369
Tia1	2.70894	2.2057	2.58768	2.4828	3.21522	1.73465	2.94699	1.53396	2.21126	1.81079	1.65153	0.786586
Phip	2.70866	1.99813	2.19683	1.60081	2.02209	1.18573	2.01239	1.22735	1.54382	1.66446	1.4901	0.976925
Crip2	2.70717	3.22898	2.52417	4.28631	2.7021	2.56671	3.14376	1.73189	3.88197	2.91617	3.52798	0.78265
Psma5	2.70047	2.4028	2.85404	2.39511	2.59412	2.29122	3.10558	2.76432	2.29188	2.21553	2.77745	2.08981
Cmpk1	2.69224	2.91343	2.65007	3.03776	2.65711	3.17211	2.51093	1.3607	4.42393	3.82782	3.85023	1.74116
Spcs2	2.68301	2.34728	3.22569	2.08951	2.85549	2.00961	2.72738	2.69432	2.1636	2.46769	2.31985	2.74096
Tox2	2.6746	1.51916	2.62323	0.759148	1.35322	0.979545	1.71985	0.471154	0.149829	0.124019	1.70961	0.0863
Dclk1	2.67276	2.94505	2.74328	3.30183	3.18999	2.68814	2.62523	0.836659	3.34178	2.79995	2.83667	0.53857
Ndufv2	2.66775	2.56549	2.91661	2.53057	2.59483	2.59203	2.65494	2.25316	3.15013	3.30947	2.88561	1.73096
Rcn2	2.65794	2.56187	2.42676	2.33014	2.58087	1.60111	2.0368	2.23232	2.20172	2.69871	2.30992	0.287823
Fnbp1l	2.65605	2.74492	2.26616	3.13945	2.45471	2.4844	3.41951	0.661135	3.68824	2.79049	3.55779	0.892991
Nrep	2.6554	2.01717	1.87792	4.52223	3.86502	3.09006	3.67153	3.43214	3.24151	4.267	2.84199	0.710235
D8Ertd738e	2.65464	2.20448	2.39286	2.09783	2.47859	2.33189	2.21612	2.9567	1.82643	2.44758	1.98026	2.15306
Dctn2	2.6539	3.4649	2.91667	3.0387	3.02759	3.03236	2.9818	1.99173	2.82659	3.404	3.06713	1.29041
Cyth2	2.6536	2.17698	1.69692	2.95436	2.11747	1.63271	2.65408	1.03159	2.51517	2.14295	2.35108	0.742981
Tomm22	2.64728	2.74665	2.33018	2.67899	2.30765	2.30161	2.07688	2.68573	2.44324	2.46232	2.92848	1.73478
Vdac1	2.64687	3.6958	3.23021	3.74587	2.58056	4.02418	2.31355	3.58348	4.52083	5.1362	4.42196	1.99575
Ndufs6	2.64661	2.59987	2.93176	3.07808	2.67119	2.76536	2.7311	2.39558	2.91539	3.70965	3.09232	2.14475
Arl3	2.64352	2.28857	2.67112	2.22555	2.57732	1.82869	2.61583	2.28745	1.76516	2.20319	1.84374	0.438403
Rundc3a	2.64102	2.15097	1.96327	2.67123	2.22504	2.08968	2.21515	0.489088	2.35054	2.83622	1.96364	0.343783
Csnk1e	2.63438	3.17205	2.23158	2.95175	2.58743	2.6983	2.63734	1.08361	2.29591	2.3727	2.41257	1.52877
Hnrnpr	2.63428	2.25634	2.29016	2.78582	2.48538	1.73319	2.93558	1.81787	2.58664	2.12014	2.28598	0.468794
Strap	2.63328	2.62807	2.57371	2.14219	2.28801	2.06254	2.59711	1.99739	1.76623	1.92491	1.68851	0.969728
Pbx1	2.63105	2.57024	2.21932	2.61288	1.82994	2.41045	2.63858	1.84314	3.84925	3.63645	11.837	0.545356
Psma6	2.62851	2.64712	2.83895	2.72399	2.4756	2.08935	2.92695	2.09254	2.21532	2.44345	2.6094	1.2913
Prdx1	2.6267	3.4584	3.19357	2.37118	2.73296	2.5749	2.54795	6.8488	1.68025	1.71979	2.13328	10.8484
Atp6v0d1	2.62599	2.45782	2.60176	2.53792	2.54704	2.69883	2.11218	1.46457	2.70961	3.23243	2.61628	2.14501
Mageh1	2.625	1.72905	2.49871	2.05836	2.92921	1.81459	2.84002	1.76938	2.02381	2.32139	2.03949	0.374535
Rps27l	2.62154	2.28389	2.64807	1.41878	2.40731	1.7516	2.34338	3.6255	1.06275	1.22662	1.5665	3.71286
Tceb1	2.62096	3.04851	3.10863	3.12183	2.83876	2.7924	2.69641	2.19257	2.53005	2.94547	2.67909	1.37702
[truncated: 18,080 more rows]

## Sheet: E17.5
Figure 4-Source Data 1 (corresponding to Figure4 and Figure4-figure supplement 1). Average gene expression [exp(logNormalized counts)-1)] obtained
[truncated: 17,048 more rows]

[truncated: 2 more sheets: P5, P12]
