# Supplementary material for: Developmental single-cell transcriptomics of hypothalamic POMC neurons reveal the genetic trajectories of multiple neuropeptidergic phenotypes
Source: eLife. 2022 Jan 19;11:e72883. doi: 10.7554/eLife.72883 (PMC8806186; doi:10.7554/eLife.72883)
Supplement: Figure 4—source data 2. [file elife-72883-fig4-data2.xlsx]

## Sheet: E11.5 
Figure 4-Source Data 2 (corresponding to Figure4). Feature genes that define each
subcluster at each of the six developmental stages
Data are sorted from highest to lowest for each subcluster by average log fold-change > 0.25 (avg_logFC)
of gene expression levels in the indicated subcluster relative to all other subclusters.
pct.1, Percentage of cells in the indicated subcluster with significant differential gene expression
pct.2, Percentage of cells in all other subclusters with significant differential gene expression
p-val, p-value
p val adj, adjusted p value for multiple comparisons
The Wilcoxin test was performed to identify differentially expressed genes in each subcluster
Gene	p_val	avg_logFC	pct.1	pct.2	p_val_adj	SubCluster
Pomc	1.84093e-216	2.531	1	1	5.15424e-212	E11.5-1
Nkx2-1	3.41867e-267	1.95329	0.989	0.084	9.57158e-263	E11.5-1
Chchd10	1.22014e-242	1.82364	0.979	0.242	3.41614e-238	E11.5-1
Six3	4.0944e-250	1.44984	0.985	0.083	1.14635e-245	E11.5-1
Sox14	7.84859e-231	1.30942	0.896	0.048	2.19745e-226	E11.5-1
Six6	9.07956e-220	1.26707	0.922	0.065	2.5421e-215	E11.5-1
Calb1	2.44118e-128	1.15362	0.738	0.138	6.83481e-124	E11.5-1
Mpped2	7.00269e-159	0.93938	0.976	0.595	1.96061e-154	E11.5-1
Pea15a	1.67806e-177	0.909474	0.98	0.738	4.69823e-173	E11.5-1
Sox3	1.92547e-192	0.886556	0.82	0.064	5.39094e-188	E11.5-1
Ap1s2	5.55522e-141	0.874979	0.959	0.694	1.55535e-136	E11.5-1
Thsd4	3.56678e-206	0.8183	0.832	0.04	9.98627e-202	E11.5-1
Nr5a1	1.96241e-213	0.815382	0.844	0.038	5.49437e-209	E11.5-1
Syt1	6.9578e-125	0.805445	0.943	0.52	1.94804e-120	E11.5-1
Tle4	3.66265e-151	0.803971	0.916	0.369	1.02547e-146	E11.5-1
Ptn	1.74482e-122	0.790372	0.992	0.655	4.88515e-118	E11.5-1
Nell2	1.39562e-119	0.728307	0.943	0.546	3.90746e-115	E11.5-1
Vat1l	1.80315e-144	0.726493	0.818	0.232	5.04846e-140	E11.5-1
Prdm12	5.20334e-161	0.725162	0.743	0.06	1.45683e-156	E11.5-1
Sox2	4.61565e-159	0.685713	0.776	0.068	1.29229e-154	E11.5-1
H2-Ab1	1.71166e-116	0.685278	0.543	0.025	4.7923e-112	E11.5-1
Pou2f2	2.15799e-123	0.681129	0.95	0.336	6.04194e-119	E11.5-1
Ehd3	3.92692e-120	0.673804	0.783	0.286	1.09946e-115	E11.5-1
Tspan17	9.47153e-95	0.67196	0.916	0.547	2.65184e-90	E11.5-1
Nr0b1	4.70684e-160	0.660801	0.683	0.023	1.31782e-155	E11.5-1
Mapk3	9.00571e-100	0.659812	0.907	0.737	2.52142e-95	E11.5-1
Pcsk1n	4.68091e-81	0.651931	0.991	0.79	1.31056e-76	E11.5-1
Celf2	3.54013e-92	0.645668	0.979	0.786	9.91166e-88	E11.5-1
Gamt	1.21465e-103	0.638087	0.869	0.461	3.40077e-99	E11.5-1
Shtn1	2.05163e-138	0.634092	0.794	0.197	5.74415e-134	E11.5-1
Slc25a5	1.36492e-84	0.629947	1	0.992	3.82149e-80	E11.5-1
Islr2	3.0178e-82	0.608878	0.953	0.628	8.44925e-78	E11.5-1
Arhgdig	7.17183e-89	0.605778	0.832	0.405	2.00797e-84	E11.5-1
Tox2	4.80333e-140	0.598445	0.845	0.203	1.34484e-135	E11.5-1
Kcnk12	5.49448e-152	0.598032	0.656	0.02	1.53835e-147	E11.5-1
Peg3	1.54016e-95	0.578744	0.977	0.688	4.31214e-91	E11.5-1
Brinp1	1.10691e-113	0.577996	0.782	0.242	3.09911e-109	E11.5-1
Isl1	5.70033e-69	0.570869	0.973	0.414	1.59598e-64	E11.5-1
Nnat	2.66425e-109	0.569251	1	1	7.45938e-105	E11.5-1
Hspa8	1.15945e-104	0.568093	1	1	3.24622e-100	E11.5-1
Lxn	7.26873e-60	0.562168	0.77	0.526	2.0351e-55	E11.5-1
Pink1	9.86584e-97	0.556789	0.896	0.589	2.76224e-92	E11.5-1
Bex1	4.85728e-81	0.553028	0.962	0.818	1.35994e-76	E11.5-1
Ppp1r14b	1.32855e-115	0.538186	0.997	0.968	3.71967e-111	E11.5-1
Myc	2.56104e-94	0.536222	0.789	0.323	7.17041e-90	E11.5-1
Nkain3	1.25198e-78	0.531466	0.779	0.379	3.5053e-74	E11.5-1
Efna5	9.2715e-70	0.507861	0.889	0.611	2.59583e-65	E11.5-1
Magel2	4.89904e-78	0.504834	0.722	0.285	1.37163e-73	E11.5-1
Kcnh2	4.81817e-78	0.50406	0.773	0.379	1.34899e-73	E11.5-1
Peg10	1.88717e-92	0.491021	0.744	0.244	5.2837e-88	E11.5-1
Shh	1.01094e-112	0.48821	0.588	0.052	2.83044e-108	E11.5-1
Kcnc1	1.22935e-102	0.486223	0.728	0.211	3.44195e-98	E11.5-1
Syt4	1.10273e-78	0.484118	0.856	0.463	3.08743e-74	E11.5-1
Rac3	5.21321e-57	0.481263	0.959	0.855	1.45959e-52	E11.5-1
Prr13	2.98404e-86	0.472238	0.965	0.821	8.35473e-82	E11.5-1
Hap1	2.92947e-91	0.467861	0.681	0.19	8.20193e-87	E11.5-1
Tmeff2	1.39808e-39	0.462761	0.856	0.587	3.91433e-35	E11.5-1
Pfn2	4.76579e-81	0.458063	0.998	0.98	1.33433e-76	E11.5-1
Pak3	1.88855e-59	0.454638	0.854	0.555	5.28756e-55	E11.5-1
Nptx2	2.14127e-95	0.452055	0.51	0.047	5.99512e-91	E11.5-1
Xpr1	1.03074e-68	0.448988	0.974	0.766	2.88586e-64	E11.5-1
Mif	4.74664e-79	0.446254	1	0.999	1.32896e-74	E11.5-1
Pkib	2.26601e-78	0.432023	0.438	0.038	6.34437e-74	E11.5-1
Dpysl2	3.34798e-47	0.421959	1	0.987	9.37367e-43	E11.5-1
Hpcal1	1.36143e-63	0.420175	0.898	0.669	3.81173e-59	E11.5-1
Tmem120a	1.80561e-63	0.419826	0.874	0.665	5.05534e-59	E11.5-1
Mid1ip1	1.91569e-50	0.418082	0.814	0.571	5.36356e-46	E11.5-1
Kctd13	4.10438e-65	0.417119	0.905	0.701	1.14914e-60	E11.5-1
L1cam	3.75306e-53	0.416863	0.896	0.623	1.05078e-48	E11.5-1
Igfbp5	6.31345e-80	0.416558	0.725	0.202	1.76764e-75	E11.5-1
Nav2	2.78748e-72	0.412889	0.749	0.323	7.80439e-68	E11.5-1
Mbip	4.51093e-65	0.412397	0.684	0.317	1.26297e-60	E11.5-1
Rpl22l1	5.40773e-65	0.412015	0.995	0.984	1.51406e-60	E11.5-1
Tub	1.7727e-72	0.409125	0.785	0.379	4.96322e-68	E11.5-1
Cd44	2.79836e-67	0.405854	0.379	0.032	7.83486e-63	E11.5-1
Eno1	1.78577e-38	0.405511	0.967	0.936	4.9998e-34	E11.5-1
S100a10	2.11477e-35	0.404013	0.967	0.685	5.92094e-31	E11.5-1
Tox	2.25873e-69	0.403794	0.654	0.218	6.324e-65	E11.5-1
Ppdpf	2.53289e-71	0.40074	0.992	0.963	7.09158e-67	E11.5-1
Chga	2.10547e-47	0.400039	0.785	0.531	5.89489e-43	E11.5-1
Plk3	6.18836e-50	0.399697	0.699	0.382	1.73262e-45	E11.5-1
Coro1c	5.43845e-58	0.395797	0.971	0.905	1.52266e-53	E11.5-1
Gnb1	5.84987e-25	0.395614	0.997	0.99	1.63785e-20	E11.5-1
Gnai2	5.82225e-61	0.394332	0.995	0.947	1.63011e-56	E11.5-1
Aprt	2.09858e-51	0.388335	0.944	0.803	5.87559e-47	E11.5-1
Robo2	2.9851e-52	0.385177	0.827	0.532	8.35768e-48	E11.5-1
Sms	1.63284e-63	0.383296	0.997	0.926	4.57163e-59	E11.5-1
Sox1	1.16065e-74	0.383144	0.602	0.154	3.24959e-70	E11.5-1
Stk32c	2.57536e-62	0.381509	0.683	0.313	7.21048e-58	E11.5-1
Ly6h	3.94924e-36	0.379521	0.967	0.747	1.10571e-31	E11.5-1
Cckar	1.23039e-84	0.375911	0.423	0.019	3.44485e-80	E11.5-1
Chgb	7.06586e-47	0.371388	0.776	0.493	1.9783e-42	E11.5-1
Klhl2	1.67931e-70	0.36951	0.609	0.2	4.70175e-66	E11.5-1
Lcorl	1.05667e-50	0.36719	0.722	0.399	2.95845e-46	E11.5-1
Bex4	5.53509e-51	0.36435	0.92	0.777	1.54971e-46	E11.5-1
Fam96b	7.57113e-61	0.363061	0.967	0.879	2.11976e-56	E11.5-1
Sgk1	1.84251e-54	0.362533	0.701	0.346	5.15866e-50	E11.5-1
Klf6	9.76569e-40	0.36145	0.868	0.647	2.7342e-35	E11.5-1
Bri3	2.64543e-76	0.360303	0.995	0.987	7.40666e-72	E11.5-1
Mzt1	3.43477e-53	0.360106	0.964	0.898	9.61667e-49	E11.5-1
Fndc3c1	5.67493e-66	0.35951	0.447	0.073	1.58887e-61	E11.5-1
Nptxr	2.6615e-64	0.359337	0.659	0.27	7.45167e-60	E11.5-1
Fbrsl1	3.98856e-54	0.357846	0.797	0.505	1.11672e-49	E11.5-1
Tagln2	1.27277e-23	0.357753	0.564	0.331	3.56349e-19	E11.5-1
Guk1	4.97125e-51	0.354388	0.922	0.852	1.39185e-46	E11.5-1
Smc6	7.43789e-45	0.352117	0.899	0.717	2.08246e-40	E11.5-1
Dpysl3	6.90419e-41	0.35165	1	0.879	1.93304e-36	E11.5-1
Panx1	1.88928e-47	0.34911	0.871	0.675	5.2896e-43	E11.5-1
D1Ertd622e	3.24889e-36	0.348412	0.758	0.533	9.09624e-32	E11.5-1
Atp1a3	8.04938e-46	0.343635	0.826	0.549	2.25367e-41	E11.5-1
1500009C09Rik	2.54303e-76	0.343434	0.547	0.114	7.11998e-72	E11.5-1
Hsp90ab1	3.81318e-119	0.34297	1	1	1.06761e-114	E11.5-1
Cpne4	3.39158e-44	0.342851	0.385	0.091	9.49576e-40	E11.5-1
Ptov1	4.08538e-86	0.341864	1	1	1.14382e-81	E11.5-1
Lpar1	1.59314e-49	0.341519	0.65	0.239	4.46048e-45	E11.5-1
Sfxn1	1.23755e-43	0.340025	0.899	0.764	3.4649e-39	E11.5-1
Prmt8	3.97155e-55	0.339909	0.797	0.433	1.11195e-50	E11.5-1
Vstm2a	1.19433e-56	0.337806	0.463	0.108	3.34388e-52	E11.5-1
Rpl38	8.63856e-91	0.331723	1	0.999	2.41862e-86	E11.5-1
Lzts1	3.3038e-45	0.331459	0.723	0.396	9.24999e-41	E11.5-1
Cmip	9.60519e-46	0.331276	0.943	0.788	2.68926e-41	E11.5-1
Srm	3.65557e-32	0.33041	0.869	0.738	1.02349e-27	E11.5-1
Pcbd1	8.92484e-38	0.32908	0.811	0.565	2.49878e-33	E11.5-1
Tkt	8.75437e-43	0.32906	0.974	0.905	2.45105e-38	E11.5-1
Rala	1.46273e-54	0.326126	0.989	0.972	4.09536e-50	E11.5-1
Prkar2b	7.67911e-42	0.325975	0.869	0.701	2.15e-37	E11.5-1
Fam60a	1.03822e-34	0.325639	0.853	0.66	2.90682e-30	E11.5-1
Gpi1	9.57477e-42	0.325516	0.977	0.94	2.68074e-37	E11.5-1
Cdkn1c	5.97298e-13	0.322585	0.994	0.976	1.67231e-08	E11.5-1
Trim35	4.45999e-41	0.321225	0.965	0.902	1.24871e-36	E11.5-1
Acsl5	2.53504e-64	0.31972	0.514	0.133	7.09762e-60	E11.5-1
Socs2	3.85742e-32	0.316984	0.65	0.399	1.08e-27	E11.5-1
Pja1	8.01989e-38	0.316661	0.949	0.887	2.24541e-33	E11.5-1
Adrb1	4.81636e-80	0.315045	0.394	0.013	1.34849e-75	E11.5-1
Arpc2	4.02306e-65	0.314444	0.997	0.987	1.12638e-60	E11.5-1
Dner	2.71404e-27	0.313839	0.776	0.604	7.59877e-23	E11.5-1
Ttc3	7.21512e-57	0.313421	1	0.994	2.02009e-52	E11.5-1
Arpc5	2.01096e-55	0.312168	0.997	0.984	5.63027e-51	E11.5-1
Fezf1	2.55128e-57	0.311999	0.296	0.011	7.14308e-53	E11.5-1
Cxxc4	2.8711e-44	0.311748	0.77	0.463	8.03851e-40	E11.5-1
Sema6a	4.65025e-34	0.310404	0.808	0.601	1.30198e-29	E11.5-1
Apc	3.62569e-39	0.309319	0.862	0.672	1.01512e-34	E11.5-1
Zdhhc2	3.88987e-35	0.30767	0.505	0.242	1.08909e-30	E11.5-1
Eef1g	4.04783e-90	0.307314	1	1	1.13331e-85	E11.5-1
Abat	4.9123e-49	0.306375	0.588	0.258	1.37535e-44	E11.5-1
Eef2	2.06798e-50	0.306135	1	1	5.78992e-46	E11.5-1
Isyna1	3.07135e-31	0.305994	0.865	0.727	8.59918e-27	E11.5-1
Stard3nl	4.90199e-40	0.304385	0.974	0.928	1.37246e-35	E11.5-1
Ahi1	1.24967e-36	0.30376	0.714	0.449	3.49882e-32	E11.5-1
Nt5c	6.01396e-31	0.303723	0.838	0.729	1.68379e-26	E11.5-1
Sh3kbp1	1.84981e-40	0.302348	0.677	0.4	5.1791e-36	E11.5-1
Peg12	3.92566e-45	0.30027	0.445	0.133	1.09911e-40	E11.5-1
Mapk11	3.18381e-44	0.300004	0.761	0.46	8.91404e-40	E11.5-1
Lrrtm3	1.36953e-44	0.297643	0.51	0.185	3.83441e-40	E11.5-1
Vim	3.02511e-38	0.297567	0.997	0.926	8.4697e-34	E11.5-1
Ncan	1.06457e-33	0.297277	0.893	0.699	2.98057e-29	E11.5-1
Gnao1	2.10469e-28	0.296568	0.895	0.741	5.89272e-24	E11.5-1
Mtch1	1.55484e-49	0.294877	1	0.995	4.35323e-45	E11.5-1
Aldoa	3.07905e-37	0.294344	0.994	0.988	8.62073e-33	E11.5-1
Gng5	4.28756e-40	0.292255	1	0.978	1.20043e-35	E11.5-1
Hn1l	2.60926e-31	0.292061	0.848	0.737	7.3054e-27	E11.5-1
Morf4l2	1.52556e-41	0.291257	0.997	0.99	4.27126e-37	E11.5-1
Tmem63b	2.44728e-36	0.290935	0.896	0.726	6.85189e-32	E11.5-1
Fam63a	4.9255e-37	0.290844	0.648	0.395	1.37904e-32	E11.5-1
Arhgdia	1.74822e-52	0.290778	0.994	0.987	4.89468e-48	E11.5-1
Tomm20	2.67064e-54	0.28842	0.997	0.995	7.47726e-50	E11.5-1
Ppp1r9a	6.9191e-39	0.287726	0.665	0.399	1.93721e-34	E11.5-1
Plp1	5.13516e-44	0.286315	0.383	0.095	1.43774e-39	E11.5-1
Fam49b	6.79113e-42	0.28441	0.967	0.902	1.90138e-37	E11.5-1
Ipo5	2.11364e-38	0.284238	0.776	0.54	5.91778e-34	E11.5-1
Csnk1e	3.41954e-34	0.282893	0.991	0.923	9.57404e-30	E11.5-1
Rpl36	4.36447e-68	0.282536	1	1	1.22196e-63	E11.5-1
Ldha	1.98986e-20	0.281221	0.956	0.911	5.5712e-16	E11.5-1
Wbscr17	1.50448e-52	0.280965	0.483	0.144	4.21224e-48	E11.5-1
Chrna4	9.79768e-33	0.280686	0.762	0.483	2.74315e-28	E11.5-1
Tnnt1	3.1355e-35	0.280446	0.408	0.15	8.77878e-31	E11.5-1
Eef1e1	2.01084e-33	0.280192	0.974	0.89	5.62996e-29	E11.5-1
Dhcr24	9.40568e-28	0.278161	0.83	0.67	2.6334e-23	E11.5-1
Tox3	3.1303e-34	0.277692	0.744	0.439	8.7642e-30	E11.5-1
B630019K06Rik	1.31e-23	0.277359	0.671	0.459	3.66775e-19	E11.5-1
Klhdc8b	7.02944e-38	0.277154	0.832	0.581	1.9681e-33	E11.5-1
Hspe1	3.04302e-39	0.273677	0.994	0.976	8.51986e-35	E11.5-1
Pik3r1	1.116e-37	0.273654	0.624	0.345	3.12458e-33	E11.5-1
Prkce	1.23475e-29	0.273526	0.496	0.252	3.45706e-25	E11.5-1
Garnl3	4.85737e-47	0.273043	0.51	0.186	1.35997e-42	E11.5-1
Pam	9.10144e-29	0.271373	0.493	0.24	2.54822e-24	E11.5-1
Rpl3	1.79457e-68	0.270858	1	0.999	5.02444e-64	E11.5-1
Foxn2	2.28274e-44	0.27028	0.493	0.19	6.39122e-40	E11.5-1
Cbln1	3.97471e-54	0.269957	0.562	0.181	1.11284e-49	E11.5-1
Col14a1	2.07517e-79	0.268174	0.394	0.014	5.81005e-75	E11.5-1
Fabp5	3.60968e-35	0.267889	1	0.996	1.01064e-30	E11.5-1
Hs6st1	1.68283e-38	0.26516	0.57	0.279	4.7116e-34	E11.5-1
Elavl3	1.08303e-18	0.26326	0.998	0.816	3.03228e-14	E11.5-1
Hk1	2.3777e-34	0.26304	0.716	0.466	6.6571e-30	E11.5-1
Srgap3	2.61535e-28	0.262399	0.677	0.442	7.32245e-24	E11.5-1
Itgb1	1.94226e-29	0.261913	0.869	0.723	5.43793e-25	E11.5-1
Tom1l1	9.02081e-45	0.26181	0.474	0.156	2.52565e-40	E11.5-1
Mapk8ip1	6.11613e-27	0.261771	0.955	0.832	1.71239e-22	E11.5-1
Mgst3	4.29094e-20	0.261754	0.92	0.837	1.20138e-15	E11.5-1
Nrxn1	9.45334e-24	0.261705	0.756	0.563	2.64675e-19	E11.5-1
Nsun2	1.65668e-31	0.26169	0.749	0.534	4.63838e-27	E11.5-1
Mllt3	6.15242e-23	0.261209	0.786	0.657	1.72255e-18	E11.5-1
Calm3	8.03777e-47	0.261182	1	0.999	2.25041e-42	E11.5-1
Foxp4	1.74574e-36	0.261148	0.556	0.267	4.88773e-32	E11.5-1
Bcl11a	6.12252e-30	0.260971	0.771	0.503	1.71418e-25	E11.5-1
Asns	1.63123e-25	0.260505	0.611	0.412	4.56712e-21	E11.5-1
Hspd1	2.849e-25	0.260497	0.964	0.914	7.97662e-21	E11.5-1
Lrp11	1.00723e-38	0.260313	0.729	0.407	2.82003e-34	E11.5-1
Rps2	2.26619e-52	0.259939	1	1	6.34489e-48	E11.5-1
Usp29	6.20352e-34	0.25991	0.713	0.455	1.73686e-29	E11.5-1
Itga6	7.8025e-46	0.258103	0.505	0.175	2.18454e-41	E11.5-1
Scrn1	9.70181e-29	0.258072	0.779	0.546	2.71631e-24	E11.5-1
Bend5	1.26008e-26	0.257938	0.811	0.619	3.52798e-22	E11.5-1
Fkbp5	1.98036e-38	0.257837	0.627	0.339	5.54461e-34	E11.5-1
Meis3	6.4479e-28	0.256743	0.964	0.82	1.80528e-23	E11.5-1
Ywhaz	1.29425e-37	0.256521	0.997	0.982	3.62363e-33	E11.5-1
Cdh2	1.43569e-28	0.256468	0.947	0.79	4.01965e-24	E11.5-1
St18	4.60558e-38	0.256332	0.465	0.166	1.28947e-33	E11.5-1
Grin3a	1.03645e-50	0.255282	0.377	0.066	2.90185e-46	E11.5-1
Akap7	3.16198e-37	0.254912	0.529	0.234	8.85292e-33	E11.5-1
Gapdh	1.44369e-54	0.254154	1	1	4.04204e-50	E11.5-1
Zdhhc12	2.34247e-28	0.253869	0.66	0.447	6.55844e-24	E11.5-1
Dnajc2	2.37297e-28	0.253496	0.931	0.84	6.64385e-24	E11.5-1
Por	5.06859e-24	0.252167	0.782	0.646	1.4191e-19	E11.5-1
Gm2694	1.99615e-80	0.250128	0.911	0.468	5.58883e-76	E11.5-1
Cartpt	9.6248e-53	2.13021	0.605	0.19	2.69475e-48	E11.5-2
Lamp5	3.41803e-150	1.9645	0.715	0.055	9.5698e-146	E11.5-2
Lhx1os	8.29393e-151	1.61365	0.765	0.073	2.32214e-146	E11.5-2
Crabp2	1.02058e-91	1.5573	0.985	0.77	2.85742e-87	E11.5-2
Mab21l2	6.09021e-91	1.33195	0.875	0.267	1.70514e-86	E11.5-2
Nr2f1	1.75624e-75	1.32494	0.88	0.394	4.91713e-71	E11.5-2
Lhx1	2.78674e-190	1.29697	0.735	0.024	7.8023e-186	E11.5-2
Meis2	7.15846e-76	1.15917	0.845	0.229	2.00423e-71	E11.5-2
Lbx1	7.77398e-209	1.10587	0.785	0.022	2.17656e-204	E11.5-2
Mir124-2hg	8.82618e-104	1.08143	0.99	0.356	2.47115e-99	E11.5-2
Olfm1	6.36128e-45	0.998487	0.935	0.696	1.78103e-40	E11.5-2
Nrxn3	6.8088e-97	0.962257	0.705	0.124	1.90633e-92	E11.5-2
Uncx	3.4301e-108	0.953982	0.695	0.095	9.60359e-104	E11.5-2
Irx2	5.9825e-43	0.932847	0.625	0.212	1.67498e-38	E11.5-2
Rpp25	4.2684e-85	0.923362	0.465	0.039	1.19507e-80	E11.5-2
Slc32a1	8.33033e-153	0.906753	0.68	0.035	2.33233e-148	E11.5-2
Cited2	1.46254e-50	0.878881	0.955	0.778	4.09482e-46	E11.5-2
Thsd7a	4.54026e-59	0.848047	0.845	0.414	1.27118e-54	E11.5-2
Hoxb2	8.18412e-102	0.844151	0.445	0.019	2.29139e-97	E11.5-2
Tfap2a	1.9734e-94	0.84203	0.54	0.055	5.52512e-90	E11.5-2
Robo3	1.16925e-43	0.83987	0.29	0.033	3.27367e-39	E11.5-2
Onecut2	9.75345e-48	0.83671	0.98	0.636	2.73077e-43	E11.5-2
Cdo1	1.64195e-44	0.827851	0.825	0.424	4.59712e-40	E11.5-2
Pnoc	7.97105e-83	0.798333	0.47	0.044	2.23174e-78	E11.5-2
Mecom	7.58203e-78	0.789255	0.465	0.049	2.12282e-73	E11.5-2
Phlda1	1.38227e-27	0.7855	0.8	0.536	3.87008e-23	E11.5-2
Rab3c	6.17495e-66	0.76451	0.9	0.469	1.72886e-61	E11.5-2
Rbfox1	8.10566e-55	0.755687	0.775	0.338	2.26942e-50	E11.5-2
Nhlh2	3.39878e-20	0.743788	0.955	0.813	9.51591e-16	E11.5-2
Gm27199	2.5627e-85	0.742406	0.63	0.105	7.17506e-81	E11.5-2
Lhx5	1.29175e-66	0.732132	0.64	0.155	3.61663e-62	E11.5-2
Dcx	3.09644e-64	0.728265	0.995	0.846	8.6694e-60	E11.5-2
Cnih2	7.62147e-58	0.715654	1	0.847	2.13386e-53	E11.5-2
Edil3	3.09634e-62	0.71192	0.785	0.295	8.66912e-58	E11.5-2
Mab21l1	2.98909e-85	0.711394	0.64	0.106	8.36885e-81	E11.5-2
Tfap2b	6.08244e-40	0.69702	0.44	0.092	1.70296e-35	E11.5-2
Irx4	4.08028e-109	0.694224	0.465	0.018	1.1424e-104	E11.5-2
Pcdh9	3.00245e-64	0.691914	0.76	0.243	8.40626e-60	E11.5-2
Zfhx3	1.05781e-13	0.688286	0.695	0.598	2.96165e-09	E11.5-2
Runx1t1	3.39738e-45	0.683186	0.95	0.738	9.51198e-41	E11.5-2
Pid1	1.40255e-13	0.678193	0.645	0.478	3.92687e-09	E11.5-2
Pcp4	4.62715e-09	0.675498	0.17	0.059	0.000129551	E11.5-2
Pax2	1.33459e-100	0.663879	0.44	0.019	3.73658e-96	E11.5-2
Gad2	5.27098e-72	0.662575	0.59	0.11	1.47577e-67	E11.5-2
Prnp	3.33377e-58	0.661805	0.87	0.43	9.33389e-54	E11.5-2
Phyhipl	2.78503e-53	0.661733	0.84	0.447	7.79752e-49	E11.5-2
Meis1	9.14664e-58	0.657243	0.545	0.118	2.56088e-53	E11.5-2
Sez6	1.4701e-35	0.650703	0.575	0.233	4.116e-31	E11.5-2
Mn1	7.71634e-34	0.611818	0.815	0.581	2.16042e-29	E11.5-2
Ank3	1.0505e-46	0.608618	0.98	0.78	2.94118e-42	E11.5-2
Spock3	2.28399e-81	0.598557	0.625	0.115	6.39472e-77	E11.5-2
Zfhx4	1.76804e-29	0.579553	0.69	0.401	4.95015e-25	E11.5-2
Cacna2d3	1.51503e-74	0.573708	0.485	0.061	4.24178e-70	E11.5-2
C1qtnf4	2.06944e-35	0.570332	0.755	0.423	5.79402e-31	E11.5-2
Phf21b	2.4645e-51	0.56676	0.87	0.485	6.90011e-47	E11.5-2
H3f3b	1.20849e-77	0.564561	1	1	3.38352e-73	E11.5-2
Asic4	1.5724e-53	0.561632	0.63	0.169	4.4024e-49	E11.5-2
Gria2	3.36178e-41	0.56135	0.805	0.423	9.4123e-37	E11.5-2
Rem2	1.86509e-46	0.558639	0.81	0.394	5.22189e-42	E11.5-2
Nr4a2	1.78941e-18	0.554486	0.42	0.167	5.00998e-14	E11.5-2
Phox2b	3.63853e-06	0.549869	0.245	0.134	0.101872	E11.5-2
Sox4	2.63948e-30	0.547631	1	0.995	7.39002e-26	E11.5-2
Crmp1	1.28344e-33	0.546722	1	0.94	3.59337e-29	E11.5-2
Cd24a	1.24148e-66	0.54147	1	0.993	3.47591e-62	E11.5-2
Map2	1.55504e-41	0.537291	0.99	0.835	4.35379e-37	E11.5-2
Id2	3.09212e-14	0.53692	0.675	0.439	8.6573e-10	E11.5-2
Nrep	8.98048e-42	0.526657	0.99	0.798	2.51435e-37	E11.5-2
Irf2bpl	1.59025e-42	0.525056	0.835	0.485	4.45238e-38	E11.5-2
Hist3h2ba	6.12159e-35	0.52275	1	0.918	1.71392e-30	E11.5-2
Plppr1	3.56696e-41	0.518259	0.675	0.27	9.98676e-37	E11.5-2
Ina	1.16648e-46	0.515307	1	0.919	3.26592e-42	E11.5-2
Chl1	3.77054e-17	0.507238	0.39	0.176	1.05568e-12	E11.5-2
Scrt2	1.47445e-42	0.503599	0.625	0.241	4.12817e-38	E11.5-2
Tubb2a	1.0275e-30	0.501307	0.995	0.935	2.87681e-26	E11.5-2
Mafb	1.25868e-49	0.501029	0.45	0.087	3.52404e-45	E11.5-2
Tagln3	2.52827e-42	0.49882	1	0.914	7.07865e-38	E11.5-2
Prdm16	1.80421e-76	0.498275	0.45	0.045	5.05142e-72	E11.5-2
Snhg11	1.17216e-21	0.490663	0.965	0.773	3.2818e-17	E11.5-2
H3f3a	8.21448e-83	0.484156	1	1	2.29989e-78	E11.5-2
Dusp26	3.15716e-27	0.482201	0.78	0.478	8.8394e-23	E11.5-2
Pbx3	1.0421e-30	0.479419	0.725	0.411	2.91766e-26	E11.5-2
Pou6f2	1.50452e-19	0.479299	0.59	0.292	4.21236e-15	E11.5-2
Zcchc12	1.79871e-16	0.475862	0.435	0.209	5.03603e-12	E11.5-2
Elavl2	1.37152e-21	0.475504	0.91	0.709	3.83998e-17	E11.5-2
Zfp804a	2.47983e-30	0.473983	0.485	0.177	6.94302e-26	E11.5-2
Tshz2	6.33506e-18	0.472646	0.515	0.273	1.77369e-13	E11.5-2
Hoxa2	4.50714e-93	0.472609	0.425	0.021	1.26191e-88	E11.5-2
Zfp811	1.67925e-37	0.471438	0.85	0.516	4.70157e-33	E11.5-2
Lrba	1.2784e-43	0.468871	0.48	0.124	3.57927e-39	E11.5-2
Mycl	8.71796e-43	0.467861	0.775	0.383	2.44085e-38	E11.5-2
Nova1	1.16796e-36	0.466377	0.625	0.266	3.27006e-32	E11.5-2
Cxxc5	4.08359e-35	0.464548	0.88	0.535	1.14332e-30	E11.5-2
Epha5	1.45897e-25	0.460084	0.58	0.273	4.08483e-21	E11.5-2
Shank1	9.95327e-35	0.458507	0.755	0.42	2.78672e-30	E11.5-2
Jarid2	9.31515e-27	0.452515	0.78	0.562	2.60805e-22	E11.5-2
Igfbpl1	3.72523e-17	0.45196	0.86	0.685	1.04299e-12	E11.5-2
Shisa2	3.88559e-26	0.450389	0.46	0.171	1.08789e-21	E11.5-2
Serpini1	4.63716e-22	0.442767	0.71	0.471	1.29831e-17	E11.5-2
Frmd4a	7.06597e-28	0.442302	0.79	0.525	1.97833e-23	E11.5-2
Pou3f4	8.20594e-31	0.440656	0.53	0.193	2.2975e-26	E11.5-2
Wbp1	8.12444e-35	0.43728	0.965	0.893	2.27468e-30	E11.5-2
Slc1a2	3.94374e-30	0.435373	0.67	0.339	1.10417e-25	E11.5-2
Skor1	3.54908e-39	0.434373	0.235	0.022	9.9367e-35	E11.5-2
G3bp2	4.07544e-34	0.433555	0.99	0.931	1.14104e-29	E11.5-2
Irx5	6.81401e-24	0.432412	0.515	0.199	1.90779e-19	E11.5-2
Tle1	1.35724e-34	0.430561	0.74	0.361	3.8e-30	E11.5-2
Tubb4a	1.46913e-26	0.428745	0.97	0.815	4.11327e-22	E11.5-2
1700025G04Rik	1.01465e-12	0.428013	0.665	0.54	2.84081e-08	E11.5-2
Hsd11b2	3.72045e-19	0.427871	0.405	0.172	1.04165e-14	E11.5-2
Ypel3	2.30382e-29	0.424014	0.94	0.765	6.45023e-25	E11.5-2
Ilf2	2.52331e-35	0.424	1	0.931	7.06475e-31	E11.5-2
Dbn1	2.10942e-26	0.422916	0.995	0.951	5.90596e-22	E11.5-2
Atp2b1	2.00663e-26	0.422708	0.93	0.797	5.61815e-22	E11.5-2
Slc30a3	2.29954e-103	0.420188	0.44	0.017	6.43826e-99	E11.5-2
Pbx1	1.1629e-20	0.419096	0.99	0.93	3.25588e-16	E11.5-2
Actl6b	3.72477e-30	0.418137	0.935	0.745	1.04286e-25	E11.5-2
Lgals7	2.82618e-13	0.417583	0.405	0.206	7.91273e-09	E11.5-2
Tle2	1.09833e-73	0.414616	0.42	0.038	3.07511e-69	E11.5-2
C130021I20Rik	1.91118e-16	0.414011	0.145	0.025	5.35092e-12	E11.5-2
Hist3h2a	9.76552e-24	0.410883	0.955	0.802	2.73415e-19	E11.5-2
Irx3	1.34402e-23	0.41068	0.505	0.199	3.76297e-19	E11.5-2
Vta1	1.18773e-26	0.408061	0.855	0.686	3.32542e-22	E11.5-2
Aplp1	2.68884e-28	0.407926	1	0.875	7.52822e-24	E11.5-2
Lmo4	2.50488e-20	0.407268	0.72	0.448	7.01317e-16	E11.5-2
Snap25	1.98519e-11	0.404553	0.885	0.798	5.55813e-07	E11.5-2
Paip2	1.23294e-42	0.402839	1	0.99	3.45199e-38	E11.5-2
Ldhb	1.17015e-25	0.401632	0.98	0.897	3.2762e-21	E11.5-2
Dpysl4	3.14374e-22	0.401115	0.985	0.818	8.80185e-18	E11.5-2
Sept6	1.34494e-24	0.399236	0.925	0.799	3.76557e-20	E11.5-2
Scrt1	1.11621e-26	0.398427	0.655	0.361	3.12518e-22	E11.5-2
Gdpd1	2.46768e-29	0.398413	0.93	0.712	6.90902e-25	E11.5-2
Bzw2	1.25706e-29	0.392349	0.975	0.914	3.51952e-25	E11.5-2
Shd	1.27327e-25	0.391418	0.875	0.679	3.56489e-21	E11.5-2
Hoxb3os	7.61061e-53	0.38006	0.23	0.008	2.13082e-48	E11.5-2
Tmem35	2.64844e-28	0.379714	0.675	0.337	7.41511e-24	E11.5-2
Cyth2	2.57039e-26	0.37762	0.99	0.949	7.19658e-22	E11.5-2
Bmp1	3.85506e-41	0.376292	0.505	0.146	1.07934e-36	E11.5-2
Tram1l1	1.0228e-18	0.375418	0.795	0.649	2.86362e-14	E11.5-2
Gad1	9.79396e-88	0.373542	0.385	0.015	2.74211e-83	E11.5-2
Tsc22d1	1.13566e-24	0.372811	0.99	0.978	3.17962e-20	E11.5-2
Podxl2	6.61761e-25	0.371614	0.955	0.867	1.8528e-20	E11.5-2
Nkain4	4.43349e-18	0.371371	0.58	0.324	1.24129e-13	E11.5-2
Cpe	6.79787e-22	0.369552	0.99	0.907	1.90327e-17	E11.5-2
Ntng1	4.82993e-10	0.369107	0.47	0.3	1.35229e-05	E11.5-2
Tubb2b	1.83328e-35	0.368745	1	0.999	5.13282e-31	E11.5-2
Malat1	1.62881e-26	0.368527	1	1	4.56035e-22	E11.5-2
Snap47	3.08005e-22	0.368144	0.9	0.763	8.62353e-18	E11.5-2
Pantr1	2.72157e-30	0.36659	0.675	0.279	7.61984e-26	E11.5-2
Cirbp	2.46626e-26	0.366309	1	0.965	6.90503e-22	E11.5-2
Pax8	8.69225e-29	0.366202	0.14	0.008	2.43366e-24	E11.5-2
Nxph1	7.05627e-38	0.365971	0.3	0.045	1.97561e-33	E11.5-2
Elmo1	1.31327e-16	0.364876	0.595	0.351	3.67689e-12	E11.5-2
Csdc2	4.05645e-29	0.364726	0.655	0.312	1.13572e-24	E11.5-2
Sh3bp5	9.63661e-19	0.36376	0.75	0.578	2.69806e-14	E11.5-2
Gpm6a	5.68946e-21	0.363101	0.885	0.636	1.59293e-16	E11.5-2
Ptbp2	1.41347e-24	0.361959	0.905	0.768	3.95742e-20	E11.5-2
Camk2n1	1.28748e-21	0.360937	0.855	0.605	3.6047e-17	E11.5-2
Epha4	1.94461e-44	0.360655	0.39	0.068	5.44451e-40	E11.5-2
Rogdi	2.37354e-26	0.359597	0.755	0.483	6.64543e-22	E11.5-2
Cabp1	5.38392e-27	0.358673	0.425	0.146	1.50739e-22	E11.5-2
Fam57b	9.29158e-19	0.358471	0.93	0.724	2.60146e-14	E11.5-2
Hnrnpa2b1	2.286e-30	0.357409	1	0.999	6.40035e-26	E11.5-2
Atat1	4.95014e-25	0.356328	0.99	0.911	1.38594e-20	E11.5-2
Prdx2	5.32111e-41	0.350469	1	1	1.4898e-36	E11.5-2
Chd3os	1.14073e-16	0.3489	0.635	0.435	3.19383e-12	E11.5-2
St8sia4	5.99931e-20	0.348754	0.53	0.284	1.67969e-15	E11.5-2
Samd14	3.2524e-22	0.345862	0.965	0.828	9.10606e-18	E11.5-2
Hdgfrp3	9.73407e-22	0.344783	0.96	0.891	2.72535e-17	E11.5-2
Nebl	1.21417e-15	0.34351	0.415	0.2	3.39944e-11	E11.5-2
Taok3	1.39053e-20	0.341084	0.82	0.596	3.89322e-16	E11.5-2
Clmp	4.28922e-19	0.340163	0.88	0.68	1.2009e-14	E11.5-2
Ebf3	2.41446e-24	0.339959	0.665	0.317	6.76e-20	E11.5-2
Ptprd	4.74909e-11	0.339098	0.595	0.462	1.32965e-06	E11.5-2
Ebf1	3.18725e-19	0.33879	0.96	0.579	8.92366e-15	E11.5-2
Ctsf	1.94661e-30	0.33864	0.575	0.251	5.45012e-26	E11.5-2
Cbr1	1.15945e-21	0.337666	0.88	0.723	3.24622e-17	E11.5-2
Idh1	4.63626e-20	0.335997	0.99	0.914	1.29806e-15	E11.5-2
Ttc28	2.67454e-19	0.33529	0.74	0.541	7.48817e-15	E11.5-2
Sox11	1.23122e-21	0.334487	1	0.988	3.44716e-17	E11.5-2
Prrxl1	1.0809e-09	0.33221	0.16	0.049	3.02631e-05	E11.5-2
Erbb4	2.13089e-54	0.330653	0.36	0.042	5.96605e-50	E11.5-2
Peli1	5.10084e-19	0.330556	0.89	0.789	1.42813e-14	E11.5-2
Cdc42bpa	1.65869e-14	0.330067	0.54	0.357	4.64401e-10	E11.5-2
Fez1	4.19177e-19	0.329916	0.99	0.875	1.17361e-14	E11.5-2
Cadm4	5.67226e-21	0.329198	0.815	0.594	1.58812e-16	E11.5-2
Aco2	1.7979e-19	0.329091	0.915	0.844	5.03377e-15	E11.5-2
Basp1	9.3744e-28	0.325567	1	0.998	2.62464e-23	E11.5-2
Sulf2	9.16066e-09	0.32489	0.56	0.456	0.00025648	E11.5-2
Apbb2	3.00464e-19	0.323857	0.77	0.571	8.4124e-15	E11.5-2
Rbm4b	6.70994e-24	0.32283	0.965	0.92	1.87865e-19	E11.5-2
Mkrn1	4.74867e-22	0.322558	0.99	0.905	1.32953e-17	E11.5-2
Fam110a	4.74241e-19	0.322271	0.55	0.308	1.32778e-14	E11.5-2
Tia1	1.36114e-23	0.321032	0.98	0.918	3.81091e-19	E11.5-2
Syndig1	1.6478e-36	0.320696	0.345	0.067	4.61351e-32	E11.5-2
Cxadr	7.56963e-20	0.320194	0.83	0.639	2.11935e-15	E11.5-2
Klhl35	2.10241e-20	0.319845	0.33	0.103	5.88632e-16	E11.5-2
Fbxo44	6.26098e-20	0.318817	0.815	0.583	1.75295e-15	E11.5-2
Zfp618	4.7692e-15	0.313437	0.73	0.599	1.33528e-10	E11.5-2
Iglon5	7.9698e-20	0.313417	0.625	0.366	2.23139e-15	E11.5-2
Pkm	3.41972e-25	0.313085	1	0.999	9.57453e-21	E11.5-2
Nefm	1.09229e-13	0.312961	0.96	0.8	3.05819e-09	E11.5-2
Cux2	2.38533e-29	0.31216	0.5	0.181	6.67846e-25	E11.5-2
Celf3	8.28661e-18	0.311975	0.96	0.794	2.32009e-13	E11.5-2
A830082K12Rik	1.81605e-25	0.310489	0.425	0.152	5.08457e-21	E11.5-2
Vangl2	1.94694e-17	0.308771	0.85	0.725	5.45105e-13	E11.5-2
Plppr3	7.5126e-19	0.307786	0.955	0.873	2.10338e-14	E11.5-2
Lypd1	3.69919e-09	0.307749	0.205	0.079	0.00010357	E11.5-2
Ddah2	4.55921e-21	0.306608	0.99	0.98	1.27649e-16	E11.5-2
Cpa4	2.87596e-55	0.30651	0.305	0.023	8.05211e-51	E11.5-2
Ubald2	1.35042e-18	0.306281	0.985	0.936	3.7809e-14	E11.5-2
Pdzrn4	4.28342e-25	0.305582	0.165	0.018	1.19927e-20	E11.5-2
Hnrnpr	1.52548e-19	0.304961	0.985	0.937	4.27104e-15	E11.5-2
Epb41	2.25323e-11	0.30491	0.695	0.572	6.30859e-07	E11.5-2
1110051M20Rik	2.39198e-22	0.304636	0.7	0.442	6.69707e-18	E11.5-2
Hdac2	3.94866e-22	0.303753	1	0.985	1.10555e-17	E11.5-2
Ndufs2	3.32347e-21	0.300804	0.97	0.91	9.30506e-17	E11.5-2
Pou3f2	4.07704e-13	0.299782	0.415	0.214	1.14149e-08	E11.5-2
Ebf2	4.04299e-13	0.299715	0.505	0.271	1.13196e-08	E11.5-2
Mgat4c	2.7325e-21	0.299489	0.285	0.077	7.65046e-17	E11.5-2
Moxd1	2.95065e-47	0.299445	0.225	0.012	8.26124e-43	E11.5-2
Smarca4	3.12796e-17	0.299373	0.985	0.939	8.75765e-13	E11.5-2
Nrcam	6.43138e-16	0.298764	0.615	0.384	1.80066e-11	E11.5-2
Pgap1	1.1136e-12	0.298402	0.455	0.283	3.11785e-08	E11.5-2
Ddx5	2.73578e-24	0.297061	1	0.999	7.65963e-20	E11.5-2
Mtf2	4.28114e-14	0.29608	0.835	0.764	1.19863e-09	E11.5-2
Gstm7	4.27944e-15	0.29522	0.76	0.594	1.19816e-10	E11.5-2
Pak7	1.41485e-16	0.294732	0.7	0.499	3.9613e-12	E11.5-2
Sh2d3c	1.72304e-15	0.294451	0.605	0.379	4.82416e-11	E11.5-2
Pgrmc1	1.5652e-15	0.294175	1	0.992	4.38225e-11	E11.5-2
Cnn3	2.59449e-17	0.293839	0.995	0.931	7.26405e-13	E11.5-2
Aplp2	7.41066e-12	0.293697	0.73	0.647	2.07484e-07	E11.5-2
Uba2	6.29704e-15	0.293027	0.84	0.739	1.76304e-10	E11.5-2
Sbk1	3.38248e-20	0.292426	1	0.904	9.47026e-16	E11.5-2
Atp6ap2	7.81708e-15	0.288836	0.76	0.606	2.18863e-10	E11.5-2
Smim18	7.49173e-18	0.288713	0.655	0.385	2.09753e-13	E11.5-2
Sfpq	1.51133e-16	0.287609	0.985	0.975	4.23143e-12	E11.5-2
Cox7a2l	1.14825e-20	0.2873	1	0.992	3.21486e-16	E11.5-2
Msi1	1.58666e-17	0.287184	0.88	0.76	4.44232e-13	E11.5-2
Hnrnph3	7.83347e-14	0.286367	0.94	0.869	2.19322e-09	E11.5-2
Tuba1a	1.22641e-25	0.286287	1	1	3.4337e-21	E11.5-2
Lingo1	3.70687e-15	0.284959	0.65	0.419	1.03785e-10	E11.5-2
Top1	3.63133e-16	0.284101	0.99	0.962	1.0167e-11	E11.5-2
Upf3b	1.57396e-13	0.28234	0.715	0.583	4.40678e-09	E11.5-2
Gbx2	2.74517e-18	0.282274	0.125	0.015	7.68594e-14	E11.5-2
Rab3a	1.11156e-15	0.28223	0.99	0.858	3.11215e-11	E11.5-2
Nuak1	1.57548e-16	0.281815	0.525	0.297	4.41103e-12	E11.5-2
Kif1bp	1.48627e-15	0.280999	0.66	0.479	4.16127e-11	E11.5-2
Adgrg1	3.9266e-15	0.279422	0.74	0.517	1.09937e-10	E11.5-2
Ip6k2	7.79033e-17	0.278915	0.89	0.791	2.18114e-12	E11.5-2
Tmem44	3.41867e-21	0.27888	0.665	0.4	9.5716e-17	E11.5-2
Nsg1	3.00464e-18	0.278816	1	0.965	8.4124e-14	E11.5-2
Rtf1	2.68198e-16	0.27845	0.965	0.894	7.509e-12	E11.5-2
Gnaz	1.63738e-12	0.277948	0.77	0.602	4.58434e-08	E11.5-2
Ier5l	1.59564e-13	0.277919	0.415	0.218	4.46748e-09	E11.5-2
Gpr22	8.8239e-23	0.276703	0.41	0.15	2.47052e-18	E11.5-2
Car10	7.05085e-12	0.276607	0.225	0.08	1.9741e-07	E11.5-2
Ckb	3.33029e-18	0.276066	0.995	0.965	9.32413e-14	E11.5-2
Commd3	3.19561e-14	0.275959	0.775	0.636	8.94707e-10	E11.5-2
Kif21b	6.62053e-17	0.275919	0.72	0.514	1.85362e-12	E11.5-2
Zfand5	3.12685e-16	0.275512	0.975	0.947	8.75456e-12	E11.5-2
Speg	2.65365e-19	0.274736	0.445	0.2	7.4297e-15	E11.5-2
Lrfn5	1.63738e-05	0.274683	0.34	0.23	0.458434	E11.5-2
Trafd1	1.62502e-15	0.274298	0.745	0.549	4.54973e-11	E11.5-2
Pou3f3	1.59791e-19	0.274279	0.46	0.192	4.47382e-15	E11.5-2
Fam216a	2.05776e-16	0.273647	0.875	0.761	5.76132e-12	E11.5-2
Trim32	3.19279e-13	0.273068	0.72	0.568	8.93917e-09	E11.5-2
Alg2	4.78812e-13	0.272385	0.85	0.75	1.34058e-08	E11.5-2
Tra2a	3.82292e-15	0.27207	0.92	0.857	1.07034e-10	E11.5-2
Gdi1	2.92968e-15	0.271221	0.995	0.951	8.20251e-11	E11.5-2
Dpcd	1.49759e-16	0.271014	0.635	0.442	4.19295e-12	E11.5-2
Scg3	4.88271e-16	0.270771	0.915	0.747	1.36706e-11	E11.5-2
Tmx2	2.66561e-12	0.270389	0.785	0.666	7.46319e-08	E11.5-2
Tspan18	1.44846e-24	0.269498	0.355	0.106	4.0554e-20	E11.5-2
Atp5a1	4.09398e-21	0.269472	1	0.998	1.14623e-16	E11.5-2
Jakmip2	7.44662e-15	0.269121	0.695	0.519	2.0849e-10	E11.5-2
Ctbp2	4.96879e-11	0.269041	0.92	0.811	1.39116e-06	E11.5-2
Hsp90aa1	9.66403e-18	0.269035	1	0.998	2.70574e-13	E11.5-2
Sncb	1.1819e-12	0.267233	0.45	0.259	3.30909e-08	E11.5-2
Arhgef2	2.7862e-11	0.266218	0.72	0.602	7.80081e-07	E11.5-2
Actr10	1.32011e-12	0.266149	0.87	0.792	3.69603e-08	E11.5-2
Rab33a	1.53503e-12	0.265941	0.635	0.443	4.29777e-08	E11.5-2
Large	3.54207e-12	0.265785	0.47	0.29	9.91708e-08	E11.5-2
9530059O14Rik	9.64771e-16	0.26445	0.365	0.156	2.70117e-11	E11.5-2
Tspan13	2.17044e-15	0.264437	0.985	0.924	6.0768e-11	E11.5-2
Rbmxl1	2.29286e-12	0.264279	0.905	0.827	6.41955e-08	E11.5-2
Hnrnpk	6.96715e-21	0.263549	1	1	1.95066e-16	E11.5-2
Dtx3	4.15322e-14	0.26301	0.92	0.866	1.16282e-09	E11.5-2
Ppp3ca	3.31523e-10	0.262317	0.91	0.883	9.28198e-06	E11.5-2
Stmn1	7.59048e-22	0.261649	1	1	2.12518e-17	E11.5-2
Ccng2	4.05378e-16	0.261121	0.725	0.507	1.13498e-11	E11.5-2
Cbx1	4.39887e-14	0.259903	0.93	0.891	1.23159e-09	E11.5-2
Pak1	4.68473e-12	0.259711	0.92	0.814	1.31163e-07	E11.5-2
Grina	3.09018e-15	0.259679	0.97	0.887	8.65189e-11	E11.5-2
Gabrg2	6.30563e-22	0.259506	0.515	0.237	1.76545e-17	E11.5-2
Ptms	2.96686e-24	0.258681	1	0.999	8.30661e-20	E11.5-2
Mdh1	6.35575e-15	0.258214	0.955	0.911	1.77948e-10	E11.5-2
Nrxn2	4.60569e-11	0.258129	0.915	0.781	1.2895e-06	E11.5-2
Tubb3	2.27657e-15	0.257966	1	0.965	6.37394e-11	E11.5-2
Lrrn1	4.66949e-15	0.257564	0.57	0.34	1.30736e-10	E11.5-2
Raf1	1.48164e-12	0.256978	0.885	0.792	4.14831e-08	E11.5-2
Pitpnc1	8.83241e-13	0.256292	0.595	0.435	2.4729e-08	E11.5-2
Rgs2	1.79603e-12	0.255671	0.635	0.445	5.02852e-08	E11.5-2
Slc38a1	4.42072e-13	0.254062	0.865	0.759	1.23771e-08	E11.5-2
Rraga	6.04748e-13	0.25404	0.89	0.829	1.69317e-08	E11.5-2
Arhgap20	2.29886e-09	0.253314	0.25	0.112	6.43636e-05	E11.5-2
Cntn2	9.08171e-12	0.252907	0.33	0.149	2.5427e-07	E11.5-2
Tmem57	2.23318e-13	0.252711	0.85	0.75	6.25246e-09	E11.5-2
Acvr2b	8.36316e-16	0.252331	0.89	0.77	2.34152e-11	E11.5-2
Ccdc34	2.30437e-13	0.252259	0.825	0.653	6.45177e-09	E11.5-2
Mtus1	2.21004e-18	0.252043	0.585	0.333	6.18768e-14	E11.5-2
Actg1	3.18591e-27	0.250702	1	1	8.91992e-23	E11.5-2
Serpinh1	1.23248e-104	2.41001	0.994	0.555	3.4507e-100	E11.5-3
Lgals1	9.8445e-104	2.37062	0.988	0.459	2.75626e-99	E11.5-3
Mest	3.10168e-98	2.29589	0.994	0.672	8.68409e-94	E11.5-3
Mdk	5.98024e-122	2.23147	0.988	0.315	1.67435e-117	E11.5-3
Col4a1	3.06923e-185	2.07286	0.971	0.105	8.59323e-181	E11.5-3
Col3a1	9.08382e-209	2.05717	0.988	0.082	2.54329e-204	E11.5-3
Sparc	1.77713e-212	2.03978	0.983	0.072	4.97562e-208	E11.5-3
Bgn	1.94859e-210	1.91247	0.96	0.067	5.45567e-206	E11.5-3
Hmgb2	7.07016e-75	1.85475	0.948	0.679	1.9795e-70	E11.5-3
Cnn2	1.50561e-211	1.84465	0.988	0.077	4.2154e-207	E11.5-3
S100a11	1.06848e-111	1.84387	0.988	0.394	2.99153e-107	E11.5-3
H19	2.0439e-146	1.8282	0.942	0.162	5.72251e-142	E11.5-3
Cxcl12	1.44015e-190	1.81474	0.983	0.099	4.03213e-186	E11.5-3
Igfbp4	5.14722e-99	1.81264	0.988	0.616	1.44112e-94	E11.5-3
Ube2c	6.15773e-83	1.79666	0.723	0.152	1.72404e-78	E11.5-3
Nkd1	2.63137e-138	1.78833	0.971	0.214	7.36732e-134	E11.5-3
Zic1	3.20083e-143	1.76137	0.988	0.2	8.96169e-139	E11.5-3
Col1a2	2.64371e-201	1.75338	0.983	0.085	7.40187e-197	E11.5-3
2810417H13Rik	6.53421e-175	1.73562	0.902	0.078	1.82945e-170	E11.5-3
Mfap2	9.34106e-95	1.67923	0.983	0.682	2.61531e-90	E11.5-3
Vtn	1.9466e-185	1.65887	0.855	0.054	5.45009e-181	E11.5-3
Cthrc1	2.47384e-154	1.63044	0.983	0.171	6.92625e-150	E11.5-3
Fbln1	2.65328e-181	1.6047	0.931	0.09	7.42866e-177	E11.5-3
Myl12a	1.40933e-99	1.53842	0.994	0.647	3.94584e-95	E11.5-3
Birc5	5.65047e-126	1.53124	0.821	0.118	1.58202e-121	E11.5-3
Eva1b	1.63163e-227	1.52765	0.977	0.057	4.56824e-223	E11.5-3
Col4a2	1.14512e-193	1.52553	0.983	0.096	3.20612e-189	E11.5-3
Id3	7.25295e-97	1.51825	0.965	0.359	2.03068e-92	E11.5-3
Hmgn2	9.99567e-93	1.50484	0.994	0.802	2.79859e-88	E11.5-3
Cks2	2.39974e-78	1.4824	0.925	0.412	6.7188e-74	E11.5-3
Igfbp2	3.7526e-87	1.44459	0.994	0.579	1.05065e-82	E11.5-3
Lum	5.02077e-232	1.43581	0.954	0.043	1.40572e-227	E11.5-3
Anxa2	2.86441e-127	1.37118	0.942	0.186	8.01977e-123	E11.5-3
Col26a1	4.04468e-182	1.36649	0.977	0.112	1.13243e-177	E11.5-3
Oaf	1.51637e-238	1.34023	0.965	0.043	4.24554e-234	E11.5-3
Ppic	2.13789e-168	1.32101	0.988	0.139	5.98568e-164	E11.5-3
Cd63	4.93297e-83	1.31915	0.977	0.715	1.38113e-78	E11.5-3
Cald1	4.04757e-130	1.31734	0.983	0.242	1.13324e-125	E11.5-3
Ifitm2	2.11786e-98	1.30763	0.988	0.414	5.92958e-94	E11.5-3
Hist1h2ap	8.16501e-73	1.29786	0.618	0.112	2.28604e-68	E11.5-3
Col1a1	1.77301e-220	1.28944	0.942	0.049	4.96409e-216	E11.5-3
Sparcl1	6.71031e-217	1.2889	0.948	0.056	1.87875e-212	E11.5-3
Cks1b	1.53183e-77	1.28769	0.977	0.732	4.28881e-73	E11.5-3
Tpm4	6.13506e-92	1.26587	0.988	0.768	1.71769e-87	E11.5-3
Tead2	2.92879e-140	1.26029	0.988	0.194	8.20001e-136	E11.5-3
Foxd1	1.29263e-208	1.25612	0.936	0.059	3.61912e-204	E11.5-3
Flrt2	2.46291e-168	1.25235	0.971	0.128	6.89566e-164	E11.5-3
Zfp36l1	5.72507e-192	1.24436	0.954	0.079	1.6029e-187	E11.5-3
Rhoc	4.39524e-127	1.23373	0.971	0.251	1.23058e-122	E11.5-3
H2afv	6.15876e-89	1.22285	0.994	0.946	1.72433e-84	E11.5-3
Tmem132c	3.22598e-195	1.21754	0.971	0.088	9.0321e-191	E11.5-3
Fstl1	1.63597e-109	1.20674	0.988	0.377	4.5804e-105	E11.5-3
Rhoj	4.20645e-246	1.20466	0.965	0.035	1.17772e-241	E11.5-3
Cenpa	6.99109e-76	1.19927	0.723	0.164	1.95737e-71	E11.5-3
Gpx7	4.97965e-134	1.19257	0.96	0.208	1.3942e-129	E11.5-3
Colec12	3.0581e-227	1.1917	0.96	0.049	8.56208e-223	E11.5-3
Tubb6	2.07239e-194	1.15896	0.884	0.054	5.80228e-190	E11.5-3
Cdh11	1.20606e-166	1.14718	0.931	0.109	3.37672e-162	E11.5-3
Fbn2	9.83099e-182	1.13038	0.936	0.084	2.75248e-177	E11.5-3
Twist1	4.5329e-234	1.11918	0.942	0.038	1.26912e-229	E11.5-3
Igf2	4.56052e-195	1.11509	0.896	0.057	1.27685e-190	E11.5-3
Tpm1	1.69521e-88	1.10208	0.988	0.616	4.74625e-84	E11.5-3
Dbi	7.04152e-83	1.09834	0.994	0.832	1.97149e-78	E11.5-3
Hmgb1	4.08864e-89	1.08792	1	0.998	1.14474e-84	E11.5-3
Top2a	5.60624e-135	1.08219	0.74	0.066	1.56963e-130	E11.5-3
H2afz	1.57142e-77	1.07585	0.994	1	4.39967e-73	E11.5-3
Cdk1	6.96379e-132	1.07186	0.763	0.078	1.94972e-127	E11.5-3
Emp3	9.39329e-204	1.07134	0.884	0.043	2.62993e-199	E11.5-3
Emp1	5.65177e-214	1.07131	0.873	0.035	1.58238e-209	E11.5-3
Ccnd3	2.40261e-104	1.06702	0.983	0.385	6.72684e-100	E11.5-3
Slc1a3	4.97144e-201	1.06643	0.873	0.044	1.3919e-196	E11.5-3
Tril	3.49271e-129	1.05438	0.96	0.204	9.77888e-125	E11.5-3
Id1	1.74109e-114	1.04663	0.786	0.107	4.87472e-110	E11.5-3
Ppib	1.13145e-88	1.04613	1	0.929	3.16784e-84	E11.5-3
Serpinf1	1.63442e-196	1.03584	0.908	0.06	4.57604e-192	E11.5-3
Gpx8	7.82121e-203	1.03471	0.942	0.066	2.18978e-198	E11.5-3
Rcn1	8.91689e-112	1.02346	0.965	0.286	2.49655e-107	E11.5-3
Prdx4	1.66548e-82	1.02211	0.971	0.61	4.66302e-78	E11.5-3
Smc4	1.82576e-95	1.01595	0.884	0.255	5.11178e-91	E11.5-3
S100a6	5.917e-190	1.0103	0.838	0.042	1.65664e-185	E11.5-3
Zic4	8.55752e-170	1.00618	0.919	0.089	2.39593e-165	E11.5-3
Prrx1	2.94803e-232	1.00269	0.925	0.034	8.25389e-228	E11.5-3
Siva1	6.99558e-91	0.998366	0.965	0.423	1.95862e-86	E11.5-3
Slc22a6	1.4558e-202	0.997131	0.815	0.029	4.07594e-198	E11.5-3
Hmgn3	5.97968e-91	0.990877	0.977	0.383	1.67419e-86	E11.5-3
Laptm4a	1.56827e-73	0.981866	0.983	0.886	4.39085e-69	E11.5-3
Heyl	2.91671e-186	0.980858	0.786	0.033	8.16619e-182	E11.5-3
Ccnd2	1.98255e-146	0.980451	0.85	0.083	5.55074e-142	E11.5-3
Cmtm3	1.67594e-159	0.97522	0.954	0.126	4.69228e-155	E11.5-3
Cdca8	8.32625e-82	0.970663	0.746	0.176	2.33118e-77	E11.5-3
Parm1	4.71844e-148	0.958882	0.798	0.072	1.32107e-143	E11.5-3
Ccna2	1.4167e-125	0.957082	0.734	0.075	3.96649e-121	E11.5-3
Rcn3	4.77912e-121	0.956307	0.908	0.186	1.33806e-116	E11.5-3
Mfap4	2.0905e-126	0.950614	0.931	0.143	5.85299e-122	E11.5-3
H2afx	1.75814e-44	0.947336	0.954	0.78	4.92245e-40	E11.5-3
Nid1	6.75033e-192	0.938043	0.913	0.066	1.88996e-187	E11.5-3
Timp3	1.89295e-156	0.929587	0.682	0.029	5.29988e-152	E11.5-3
Eef1d	5.23101e-76	0.925352	0.983	0.805	1.46458e-71	E11.5-3
Prrx2	3.02129e-216	0.919092	0.867	0.032	8.459e-212	E11.5-3
Gng11	2.05716e-194	0.909233	0.821	0.036	5.75964e-190	E11.5-3
Fabp7	2.2978e-90	0.900546	0.763	0.15	6.43339e-86	E11.5-3
Pdlim2	1.38315e-160	0.89532	0.873	0.086	3.87254e-156	E11.5-3
Loxl1	4.52563e-209	0.894564	0.867	0.038	1.26709e-204	E11.5-3
Lhfp	3.18172e-157	0.894362	0.948	0.125	8.90817e-153	E11.5-3
Apod	2.09786e-190	0.893135	0.798	0.034	5.87359e-186	E11.5-3
Hes1	3.51068e-154	0.89082	0.803	0.068	9.8292e-150	E11.5-3
Tbx18	1.58893e-227	0.889213	0.855	0.023	4.44869e-223	E11.5-3
Copz2	9.76732e-185	0.888468	0.919	0.074	2.73466e-180	E11.5-3
Anxa6	1.40833e-127	0.871429	0.884	0.152	3.94304e-123	E11.5-3
Fam64a	1.36919e-70	0.870335	0.694	0.168	3.83346e-66	E11.5-3
Selm	6.0133e-90	0.869436	0.919	0.297	1.6836e-85	E11.5-3
Mdfi	1.56195e-188	0.869344	0.902	0.063	4.37315e-184	E11.5-3
Foxc1	1.69414e-231	0.861112	0.896	0.029	4.74326e-227	E11.5-3
Spc25	3.77196e-126	0.859138	0.694	0.063	1.05607e-121	E11.5-3
Hmga2	1.29331e-146	0.85887	0.78	0.06	3.621e-142	E11.5-3
Anp32b	9.52341e-74	0.858345	0.994	0.896	2.66636e-69	E11.5-3
Anp32a	8.40492e-70	0.856568	0.988	0.838	2.35321e-65	E11.5-3
Ost4	1.86893e-81	0.854636	0.988	0.885	5.23263e-77	E11.5-3
Rrbp1	1.29198e-96	0.853805	0.965	0.335	3.61729e-92	E11.5-3
Lsm2	6.53923e-67	0.851129	0.954	0.704	1.83085e-62	E11.5-3
Cenpf	6.04172e-110	0.849829	0.601	0.047	1.69156e-105	E11.5-3
Gja1	1.42806e-196	0.849463	0.815	0.032	3.99829e-192	E11.5-3
Col9a1	4.73613e-177	0.841361	0.751	0.032	1.32602e-172	E11.5-3
Crip1	3.14022e-59	0.841068	0.919	0.385	8.79198e-55	E11.5-3
Gpc3	4.44479e-141	0.839009	0.85	0.098	1.24445e-136	E11.5-3
Fam212a	6.09077e-136	0.838619	0.908	0.14	1.70529e-131	E11.5-3
Pdia6	4.63957e-50	0.835543	0.994	0.835	1.29899e-45	E11.5-3
Wls	1.02575e-184	0.829572	0.931	0.076	2.87189e-180	E11.5-3
Kdelr2	1.41748e-60	0.826687	0.948	0.576	3.96865e-56	E11.5-3
Cdc20	1.66065e-84	0.812084	0.601	0.079	4.6495e-80	E11.5-3
Il11ra1	1.1188e-115	0.808178	0.931	0.215	3.13241e-111	E11.5-3
Ptbp1	5.87296e-83	0.801905	0.925	0.345	1.64431e-78	E11.5-3
Ccnb1	1.03318e-106	0.797653	0.63	0.06	2.8927e-102	E11.5-3
Arpc1b	2.27387e-87	0.796789	0.838	0.216	6.36639e-83	E11.5-3
Cdca3	1.14018e-82	0.796519	0.653	0.105	3.19228e-78	E11.5-3
Galk1	1.08746e-107	0.790286	0.913	0.221	3.04468e-103	E11.5-3
H1f0	1.50972e-29	0.789713	0.965	0.875	4.22692e-25	E11.5-3
Col2a1	2.46357e-126	0.787154	0.769	0.087	6.8975e-122	E11.5-3
Mrfap1	6.63261e-87	0.784498	1	0.984	1.857e-82	E11.5-3
Gatm	5.97621e-108	0.782379	0.763	0.115	1.67322e-103	E11.5-3
Pdgfrb	3.50581e-218	0.781038	0.821	0.021	9.81557e-214	E11.5-3
Hmgn1	5.50047e-84	0.778413	1	0.999	1.54002e-79	E11.5-3
Pcolce	6.89257e-141	0.775994	0.792	0.081	1.92978e-136	E11.5-3
Gmnn	2.42475e-94	0.770974	0.884	0.229	6.78881e-90	E11.5-3
Pltp	8.71627e-161	0.76984	0.74	0.041	2.44038e-156	E11.5-3
Sat1	4.21198e-43	0.769402	0.78	0.407	1.17927e-38	E11.5-3
Cdc42ep5	4.71688e-166	0.764915	0.827	0.064	1.32063e-161	E11.5-3
Zfp36l2	1.95302e-145	0.764137	0.85	0.091	5.46806e-141	E11.5-3
Bcl7c	6.84067e-74	0.760734	0.977	0.623	1.91525e-69	E11.5-3
Tcf4	1.77934e-73	0.756293	0.948	0.425	4.98179e-69	E11.5-3
Jun	1.92461e-68	0.753101	0.913	0.334	5.38853e-64	E11.5-3
Rps20	1.64556e-88	0.748095	1	1	4.60723e-84	E11.5-3
Ccnb2	7.19067e-112	0.747857	0.682	0.07	2.01324e-107	E11.5-3
Tpm2	1.36726e-106	0.745822	0.896	0.171	3.82804e-102	E11.5-3
Igf1	3.00851e-116	0.744544	0.734	0.08	8.42322e-112	E11.5-3
Prdx1	4.42925e-64	0.743484	0.994	0.922	1.2401e-59	E11.5-3
Txndc5	1.23185e-69	0.741633	0.983	0.565	3.44892e-65	E11.5-3
Col5a2	1.63225e-164	0.735537	0.85	0.068	4.56996e-160	E11.5-3
Nudcd2	1.3062e-77	0.732238	0.988	0.518	3.65711e-73	E11.5-3
Gng12	2.10981e-126	0.728332	0.89	0.147	5.90706e-122	E11.5-3
Abracl	4.00375e-59	0.726942	0.983	0.739	1.12097e-54	E11.5-3
Ssr2	9.03963e-62	0.725517	0.983	0.84	2.53092e-57	E11.5-3
Add3	2.25309e-153	0.723399	0.821	0.073	6.3082e-149	E11.5-3
Sfrp1	1.65631e-64	0.72203	0.861	0.322	4.63735e-60	E11.5-3
Angptl4	3.83625e-171	0.714882	0.821	0.054	1.07407e-166	E11.5-3
Efnb1	1.50982e-67	0.712263	0.855	0.324	4.22719e-63	E11.5-3
2700094K13Rik	1.46771e-57	0.712	0.988	0.943	4.1093e-53	E11.5-3
Aurkb	6.99052e-133	0.71086	0.624	0.034	1.95721e-128	E11.5-3
Cstb	3.83865e-58	0.710655	0.954	0.592	1.07475e-53	E11.5-3
1810058I24Rik	9.16126e-51	0.707492	0.994	0.959	2.56497e-46	E11.5-3
Myl9	1.85285e-158	0.707317	0.78	0.052	5.1876e-154	E11.5-3
Sdc2	8.54182e-161	0.700134	0.815	0.062	2.39154e-156	E11.5-3
Col6a2	1.11297e-161	0.69555	0.838	0.071	3.1161e-157	E11.5-3
Tcf3	1.40757e-65	0.693226	0.977	0.648	3.94093e-61	E11.5-3
Ptgis	4.29496e-178	0.692579	0.78	0.038	1.2025e-173	E11.5-3
Pcdh18	3.96039e-187	0.690338	0.821	0.042	1.10883e-182	E11.5-3
Spc24	2.90214e-143	0.689494	0.786	0.071	8.12541e-139	E11.5-3
Rps27l	3.4632e-71	0.6886	1	0.963	9.69628e-67	E11.5-3
Rplp1	4.41344e-84	0.688184	1	1	1.23567e-79	E11.5-3
Msx1	2.45093e-134	0.687637	0.538	0.014	6.86212e-130	E11.5-3
Rrm2	8.71967e-72	0.686799	0.676	0.138	2.44133e-67	E11.5-3
Fkbp10	1.20527e-207	0.686454	0.832	0.029	3.37452e-203	E11.5-3
Osr1	1.94999e-171	0.685149	0.636	0.012	5.45958e-167	E11.5-3
Fkbp9	2.36866e-132	0.68151	0.879	0.131	6.63176e-128	E11.5-3
P4hb	4.89571e-62	0.68013	0.983	0.809	1.3707e-57	E11.5-3
Phlda1	3.60351e-43	0.679215	0.948	0.522	1.00891e-38	E11.5-3
Txn1	1.51887e-71	0.678754	0.994	0.98	4.25252e-67	E11.5-3
Nde1	7.93674e-96	0.678613	0.78	0.143	2.22213e-91	E11.5-3
Rnf26	3.56379e-75	0.674286	0.809	0.24	9.97791e-71	E11.5-3
Efemp2	7.30205e-165	0.673464	0.844	0.068	2.04443e-160	E11.5-3
Nap1l1	1.52433e-73	0.669037	1	0.986	4.26783e-69	E11.5-3
Col23a1	3.34259e-169	0.668673	0.746	0.034	9.35859e-165	E11.5-3
Nusap1	1.32668e-94	0.668198	0.561	0.052	3.71444e-90	E11.5-3
Limd2	1.54313e-62	0.66774	0.988	0.908	4.32044e-58	E11.5-3
Rpl36a	8.8407e-79	0.667226	0.994	0.999	2.47522e-74	E11.5-3
Serp1	3.16207e-55	0.666992	0.977	0.706	8.85317e-51	E11.5-3
Nkd2	1.6189e-137	0.666875	0.827	0.097	4.53259e-133	E11.5-3
Ostc	1.14996e-58	0.666285	0.994	0.92	3.21966e-54	E11.5-3
Lamc3	1.05886e-197	0.664731	0.803	0.029	2.96459e-193	E11.5-3
Pcca	3.1779e-114	0.662126	0.803	0.123	8.89748e-110	E11.5-3
Dnajc9	1.99848e-58	0.661499	0.896	0.441	5.59533e-54	E11.5-3
Krtcap2	3.02562e-67	0.660913	0.994	0.923	8.47112e-63	E11.5-3
Serf2	7.47556e-77	0.660617	1	0.999	2.09301e-72	E11.5-3
Cldn11	1.29638e-137	0.660337	0.578	0.02	3.6296e-133	E11.5-3
Cped1	3.01662e-200	0.656774	0.809	0.029	8.44593e-196	E11.5-3
Sec61b	4.11672e-70	0.651697	0.994	0.986	1.1526e-65	E11.5-3
Nbl1	1.15849e-124	0.651043	0.659	0.05	3.24355e-120	E11.5-3
Plpp3	1.06765e-76	0.650454	0.694	0.135	2.98919e-72	E11.5-3
Gins2	1.17154e-110	0.650136	0.792	0.118	3.28009e-106	E11.5-3
Axin2	3.26782e-149	0.650028	0.815	0.073	9.14924e-145	E11.5-3
Tpx2	1.70872e-111	0.648097	0.636	0.057	4.78408e-107	E11.5-3
Hadh	3.22412e-80	0.645735	0.85	0.251	9.0269e-76	E11.5-3
Flna	2.33648e-78	0.643999	0.89	0.301	6.54168e-74	E11.5-3
Col6a1	3.90571e-187	0.642968	0.78	0.032	1.09352e-182	E11.5-3
Rpl28	4.19099e-86	0.642774	1	1	1.17339e-81	E11.5-3
Tmpo	5.7437e-48	0.641576	0.96	0.74	1.60812e-43	E11.5-3
Dek	1.5693e-46	0.638772	0.931	0.668	4.39372e-42	E11.5-3
Hnrnpf	3.18858e-50	0.637908	0.988	0.961	8.92739e-46	E11.5-3
Arhgap29	6.66754e-150	0.637437	0.769	0.058	1.86678e-145	E11.5-3
Tgfb1i1	5.02515e-72	0.635528	0.85	0.293	1.40694e-67	E11.5-3
Sox9	1.59715e-121	0.634906	0.613	0.04	4.47169e-117	E11.5-3
Pmf1	3.11e-88	0.634598	0.85	0.22	8.70738e-84	E11.5-3
Tmem51	4.00325e-161	0.633767	0.786	0.052	1.12083e-156	E11.5-3
Tns3	1.20693e-142	0.632203	0.832	0.086	3.37916e-138	E11.5-3
Rpl22	1.14032e-76	0.631582	1	0.997	3.19266e-72	E11.5-3
Frzb	1.65151e-118	0.627279	0.775	0.093	4.62389e-114	E11.5-3
Myl6	7.34769e-56	0.62495	1	0.984	2.05721e-51	E11.5-3
Eif4ebp1	2.68596e-64	0.624387	0.936	0.402	7.52014e-60	E11.5-3
Tuba1b	5.96535e-46	0.623892	1	1	1.67018e-41	E11.5-3
Srsf9	1.11295e-56	0.622035	0.954	0.632	3.11605e-52	E11.5-3
Rbp1	3.55282e-33	0.621932	0.96	0.632	9.94718e-29	E11.5-3
Fn1	2.42683e-150	0.620578	0.74	0.048	6.79464e-146	E11.5-3
Anxa5	8.39788e-46	0.61965	0.884	0.478	2.35124e-41	E11.5-3
Ier2	4.76164e-44	0.619044	0.861	0.461	1.33316e-39	E11.5-3
Ostf1	6.60674e-49	0.615753	0.908	0.496	1.84975e-44	E11.5-3
Rab34	5.88987e-74	0.615614	0.908	0.325	1.64905e-69	E11.5-3
Pfn1	4.39754e-74	0.615225	1	1	1.23122e-69	E11.5-3
Rpl13	1.77192e-85	0.614695	0.994	1	4.96102e-81	E11.5-3
Tipin	1.82278e-51	0.614194	0.798	0.33	5.10341e-47	E11.5-3
Lsm5	5.8525e-57	0.614037	0.994	0.83	1.63858e-52	E11.5-3
Fam174b	1.0017e-53	0.612406	0.861	0.372	2.80456e-49	E11.5-3
Dab2	1.316e-157	0.611718	0.74	0.039	3.68453e-153	E11.5-3
Tmem167	3.89702e-52	0.611572	0.988	0.95	1.09109e-47	E11.5-3
Cd81	6.70709e-46	0.610768	0.983	0.872	1.87785e-41	E11.5-3
Sept2	4.91097e-55	0.608466	0.988	0.712	1.37497e-50	E11.5-3
Dap	4.39498e-74	0.606532	0.925	0.354	1.23051e-69	E11.5-3
Glipr2	1.42612e-60	0.60652	0.902	0.405	3.99284e-56	E11.5-3
Fbln2	1.50767e-159	0.60558	0.676	0.026	4.22117e-155	E11.5-3
Rpl12	2.76429e-69	0.601723	0.994	1	7.73945e-65	E11.5-3
Tnfrsf1a	1.50239e-125	0.6016	0.769	0.084	4.2064e-121	E11.5-3
Rps29	5.6118e-85	0.599386	1	1	1.57119e-80	E11.5-3
Rbms1	4.536e-46	0.598237	0.971	0.681	1.26999e-41	E11.5-3
Tmed10	2.23011e-57	0.595491	0.988	0.822	6.24387e-53	E11.5-3
Snap23	1.23149e-119	0.595204	0.803	0.107	3.44792e-115	E11.5-3
Rnaseh2c	6.33525e-52	0.590751	0.942	0.571	1.77374e-47	E11.5-3
Sdc1	2.59718e-64	0.590116	0.861	0.339	7.27158e-60	E11.5-3
Rest	4.00954e-151	0.589539	0.792	0.062	1.12259e-146	E11.5-3
Tyms	1.26302e-53	0.589417	0.751	0.269	3.5362e-49	E11.5-3
Cenpm	1.81615e-133	0.589295	0.769	0.074	5.08484e-129	E11.5-3
Cyba	1.94237e-108	0.586422	0.763	0.105	5.43824e-104	E11.5-3
Rbm3	6.18887e-67	0.585353	0.994	0.995	1.73276e-62	E11.5-3
Smc2	5.84495e-43	0.585333	0.803	0.422	1.63647e-38	E11.5-3
Emilin1	1.12789e-165	0.584127	0.775	0.045	3.15787e-161	E11.5-3
Ahnak	2.16806e-173	0.584038	0.74	0.031	6.07013e-169	E11.5-3
Rsu1	1.77887e-63	0.583206	0.873	0.348	4.98049e-59	E11.5-3
Tmem119	1.96473e-175	0.583173	0.734	0.028	5.50086e-171	E11.5-3
Csrp2	2.16706e-35	0.580302	0.965	0.798	6.06734e-31	E11.5-3
Wfdc1	5.40685e-138	0.57849	0.538	0.013	1.51381e-133	E11.5-3
Npm1	2.24441e-51	0.577998	1	1	6.28391e-47	E11.5-3
Lig1	5.75842e-50	0.575875	0.775	0.298	1.61224e-45	E11.5-3
Slc29a1	1.35904e-103	0.574832	0.665	0.075	3.80504e-99	E11.5-3
Lmo4	4.25233e-41	0.574682	0.861	0.435	1.19057e-36	E11.5-3
Snrpb	8.76994e-62	0.574641	0.994	0.975	2.45541e-57	E11.5-3
Itih5	3.02411e-157	0.574609	0.659	0.023	8.46689e-153	E11.5-3
Tnfaip8	1.66781e-159	0.572851	0.809	0.059	4.66955e-155	E11.5-3
Arl6ip1	0.000717996	0.572393	0.913	0.909	1	E11.5-3
Cenpe	4.13814e-122	0.572331	0.584	0.032	1.1586e-117	E11.5-3
Ctdsp1	2.62845e-159	0.57228	0.838	0.069	7.35913e-155	E11.5-3
Foxp1	1.79111e-41	0.571512	0.977	0.627	5.01475e-37	E11.5-3
Rpl41	3.03838e-85	0.571189	1	1	8.50686e-81	E11.5-3
Hsp90b1	1.99928e-33	0.570783	0.971	0.837	5.59759e-29	E11.5-3
Tnfrsf19	1.04218e-140	0.568187	0.763	0.063	2.9179e-136	E11.5-3
Bcl2l12	5.47057e-162	0.566868	0.786	0.053	1.53165e-157	E11.5-3
Lrrc17	2.73803e-165	0.566546	0.659	0.02	7.66592e-161	E11.5-3
Snx3	2.67746e-57	0.566442	0.994	0.856	7.49634e-53	E11.5-3
Gng5	7.26919e-57	0.564751	1	0.986	2.03523e-52	E11.5-3
Bak1	3.03147e-84	0.564176	0.821	0.205	8.4875e-80	E11.5-3
Calu	1.33259e-53	0.563031	0.931	0.515	3.73099e-49	E11.5-3
Hjurp	9.12621e-51	0.562836	0.769	0.305	2.55516e-46	E11.5-3
Pmp22	4.37778e-115	0.562281	0.763	0.088	1.22569e-110	E11.5-3
Nrep	1.23782e-33	0.56193	0.994	0.802	3.46565e-29	E11.5-3
Mki67	1.33118e-105	0.561592	0.659	0.069	3.72704e-101	E11.5-3
Eif1ax	1.40144e-53	0.56118	0.983	0.853	3.92374e-49	E11.5-3
Rps2	2.77891e-61	0.560263	1	1	7.78039e-57	E11.5-3
Knstrn	1.3856e-75	0.560042	0.561	0.075	3.87939e-71	E11.5-3
Tpst1	2.31311e-62	0.558598	0.861	0.327	6.47624e-58	E11.5-3
Ifitm3	6.88872e-129	0.55572	0.584	0.026	1.9287e-124	E11.5-3
Vamp3	5.35392e-57	0.555411	0.89	0.368	1.49899e-52	E11.5-3
Yap1	3.39107e-173	0.553679	0.751	0.034	9.49433e-169	E11.5-3
Surf4	8.24262e-47	0.55341	0.936	0.598	2.30777e-42	E11.5-3
Nucks1	4.44307e-35	0.549362	0.971	0.868	1.24397e-30	E11.5-3
Hmg20b	8.01346e-57	0.54812	0.948	0.548	2.24361e-52	E11.5-3
Rpsa	8.02652e-71	0.547505	1	1	2.24726e-66	E11.5-3
Epha7	1.09508e-53	0.547106	0.769	0.247	3.066e-49	E11.5-3
Tmem165	2.68335e-53	0.546972	0.971	0.666	7.51285e-49	E11.5-3
Mmp2	1.13144e-125	0.54671	0.694	0.06	3.16782e-121	E11.5-3
Atp1a2	1.51195e-132	0.54636	0.578	0.023	4.23317e-128	E11.5-3
St6galnac3	1.64373e-115	0.545961	0.786	0.107	4.60211e-111	E11.5-3
0610010K14Rik	2.02275e-55	0.545574	0.942	0.522	5.66331e-51	E11.5-3
Ssr1	3.92591e-44	0.543673	0.971	0.7	1.09918e-39	E11.5-3
Ptk7	2.61585e-69	0.542749	0.815	0.234	7.32386e-65	E11.5-3
Prc1	6.47781e-85	0.540992	0.566	0.066	1.81366e-80	E11.5-3
Oat	3.19428e-46	0.538675	0.827	0.405	8.94335e-42	E11.5-3
Dtymk	6.44969e-46	0.538437	0.948	0.667	1.80578e-41	E11.5-3
Ctdsp2	5.2238e-63	0.538357	0.89	0.339	1.46256e-58	E11.5-3
Tmbim6	2.0507e-41	0.538227	0.96	0.746	5.74154e-37	E11.5-3
Rps16	6.79992e-79	0.537942	1	1	1.90384e-74	E11.5-3
Aebp1	1.40526e-156	0.537892	0.624	0.018	3.93444e-152	E11.5-3
Prkcdbp	3.34551e-133	0.537359	0.711	0.057	9.36676e-129	E11.5-3
Itm2b	2.21109e-45	0.537209	0.988	0.837	6.19062e-41	E11.5-3
Shfm1	4.54146e-60	0.536549	1	0.989	1.27152e-55	E11.5-3
Fth1	2.56138e-75	0.536169	1	1	7.17136e-71	E11.5-3
Ran	6.74661e-56	0.535745	1	0.999	1.88891e-51	E11.5-3
S1pr3	7.49508e-174	0.53396	0.699	0.022	2.09847e-169	E11.5-3
Mlec	1.96902e-51	0.533948	0.919	0.443	5.51286e-47	E11.5-3
Magt1	1.10097e-75	0.533766	0.827	0.226	3.08249e-71	E11.5-3
Srp9	2.08038e-52	0.530255	0.988	0.889	5.82465e-48	E11.5-3
Tmed1	4.79425e-59	0.52903	0.873	0.372	1.34229e-54	E11.5-3
Eny2	3.37313e-49	0.528163	0.983	0.847	9.44408e-45	E11.5-3
Cd302	5.58186e-125	0.524789	0.763	0.082	1.56281e-120	E11.5-3
Lpar1	3.18573e-50	0.524658	0.913	0.357	8.91941e-46	E11.5-3
Ssr3	7.20653e-43	0.523872	0.994	0.843	2.01768e-38	E11.5-3
Cd248	2.20957e-155	0.523533	0.636	0.021	6.18634e-151	E11.5-3
Tpbg	3.43566e-80	0.521754	0.659	0.104	9.61915e-76	E11.5-3
Rps12	4.69822e-67	0.521656	1	1	1.31541e-62	E11.5-3
Grb10	9.48038e-38	0.520891	0.983	0.71	2.65432e-33	E11.5-3
Rps15a	2.65975e-79	0.519902	1	1	7.44678e-75	E11.5-3
Sri	3.89245e-38	0.518698	0.96	0.727	1.08981e-33	E11.5-3
Mis18a	4.71443e-49	0.51666	0.734	0.272	1.31995e-44	E11.5-3
Rpl39	1.11361e-72	0.516603	1	1	3.11789e-68	E11.5-3
Itm2a	1.66399e-120	0.516467	0.665	0.054	4.65885e-116	E11.5-3
Ecscr	5.54056e-137	0.516333	0.601	0.026	1.55125e-132	E11.5-3
Pdlim4	5.53518e-110	0.515943	0.642	0.057	1.54974e-105	E11.5-3
Rbms2	5.76604e-90	0.515528	0.821	0.174	1.61438e-85	E11.5-3
Idh2	1.24807e-31	0.514439	0.936	0.816	3.49435e-27	E11.5-3
Tram1	1.68285e-54	0.513902	0.879	0.377	4.71165e-50	E11.5-3
Impdh2	5.82612e-29	0.512063	0.919	0.758	1.6312e-24	E11.5-3
Zic5	1.75286e-164	0.511067	0.688	0.025	4.90767e-160	E11.5-3
Vcan	1.03165e-34	0.509119	0.965	0.593	2.88841e-30	E11.5-3
Clic1	4.65012e-38	0.507602	0.994	0.867	1.30194e-33	E11.5-3
Dpm3	7.01418e-43	0.507276	0.867	0.489	1.96383e-38	E11.5-3
Pofut2	5.46073e-45	0.506159	0.919	0.525	1.5289e-40	E11.5-3
Tacc3	1.09115e-75	0.504634	0.607	0.093	3.05499e-71	E11.5-3
Arhgap31	5.6446e-142	0.503446	0.746	0.055	1.58037e-137	E11.5-3
Chst1	3.31918e-55	0.501414	0.566	0.118	9.29304e-51	E11.5-3
Csrp1	1.07533e-88	0.500809	0.803	0.149	3.01071e-84	E11.5-3
Slc9a3r1	1.91029e-76	0.500455	0.705	0.134	5.34842e-72	E11.5-3
Mrps16	5.16608e-47	0.500032	0.965	0.672	1.4464e-42	E11.5-3
Rps15	6.98541e-77	0.499948	1	1	1.95577e-72	E11.5-3
Pald1	1.70447e-109	0.498422	0.642	0.06	4.77217e-105	E11.5-3
Tk1	5.27225e-111	0.498328	0.624	0.051	1.47613e-106	E11.5-3
Carnmt1	3.62497e-53	0.497829	0.792	0.309	1.01492e-48	E11.5-3
Tcf12	3.73664e-39	0.495756	0.954	0.681	1.04618e-34	E11.5-3
Parva	4.21208e-81	0.495715	0.821	0.192	1.1793e-76	E11.5-3
Atp5g2	3.08737e-62	0.495013	0.994	0.998	8.64401e-58	E11.5-3
Usp1	2.83461e-62	0.49363	0.728	0.192	7.93635e-58	E11.5-3
Mad2l1	7.56807e-87	0.493594	0.659	0.101	2.11891e-82	E11.5-3
Lockd	3.9915e-92	0.493009	0.572	0.056	1.11754e-87	E11.5-3
Tns1	1.34073e-112	0.492843	0.711	0.078	3.75377e-108	E11.5-3
Lmnb1	2.7953e-30	0.491642	0.931	0.802	7.82628e-26	E11.5-3
Snrpf	9.45086e-45	0.489944	0.994	0.972	2.64605e-40	E11.5-3
Uhrf1	1.0684e-81	0.488326	0.694	0.122	2.99131e-77	E11.5-3
Dlc1	4.97956e-83	0.488081	0.723	0.131	1.39418e-78	E11.5-3
Cnih4	1.17335e-44	0.487689	0.867	0.457	3.28513e-40	E11.5-3
Etfb	1.10025e-34	0.487449	0.948	0.68	3.08048e-30	E11.5-3
Cnpy2	1.22319e-42	0.487259	0.983	0.855	3.4247e-38	E11.5-3
Ckap2l	3.35799e-113	0.486858	0.555	0.032	9.40169e-109	E11.5-3
Kdelr3	1.60645e-167	0.484252	0.659	0.017	4.49775e-163	E11.5-3
Pdk3	1.27625e-69	0.483756	0.775	0.202	3.57325e-65	E11.5-3
Col5a1	5.89457e-150	0.482449	0.642	0.026	1.65036e-145	E11.5-3
Sec11a	1.25167e-34	0.482082	0.971	0.812	3.50442e-30	E11.5-3
Raly	6.39701e-50	0.481798	0.994	0.986	1.79104e-45	E11.5-3
Ccdc34	2.44299e-40	0.481718	0.954	0.64	6.83989e-36	E11.5-3
Maged2	3.71937e-25	0.481596	0.96	0.846	1.04135e-20	E11.5-3
Rpl35a	1.11633e-67	0.481051	1	1	3.12551e-63	E11.5-3
Tagln	7.49226e-106	0.480834	0.497	0.025	2.09768e-101	E11.5-3
Asf1b	1.8711e-101	0.480556	0.647	0.072	5.2387e-97	E11.5-3
Aard	1.17607e-68	0.480401	0.543	0.078	3.29276e-64	E11.5-3
Tubb4b	1.75014e-13	0.480331	0.931	0.82	4.90004e-09	E11.5-3
Aurka	4.61389e-63	0.478501	0.509	0.078	1.2918e-58	E11.5-3
2610001J05Rik	6.73527e-40	0.477582	0.942	0.632	1.88574e-35	E11.5-3
Nab2	4.34645e-155	0.476905	0.653	0.025	1.21692e-150	E11.5-3
Shc1	7.78841e-71	0.476552	0.803	0.211	2.1806e-66	E11.5-3
Slc9a3r2	1.95361e-85	0.476547	0.74	0.139	5.46971e-81	E11.5-3
Wasf2	5.76754e-63	0.475226	0.769	0.219	1.6148e-58	E11.5-3
Lamc1	7.17496e-108	0.4743	0.699	0.082	2.00885e-103	E11.5-3
Pdlim7	6.30889e-42	0.473975	0.948	0.717	1.76636e-37	E11.5-3
Crtap	9.11127e-141	0.473482	0.717	0.05	2.55097e-136	E11.5-3
Tmem123	3.60657e-81	0.473284	0.78	0.159	1.00977e-76	E11.5-3
Nasp	8.98818e-33	0.47273	0.931	0.669	2.51651e-28	E11.5-3
Hdlbp	1.54257e-39	0.472325	0.896	0.529	4.31889e-35	E11.5-3
Cnbp	8.24504e-43	0.470927	0.988	0.988	2.30845e-38	E11.5-3
Col11a1	1.16828e-118	0.470442	0.705	0.066	3.27096e-114	E11.5-3
Ak3	5.26319e-37	0.470387	0.855	0.477	1.47359e-32	E11.5-3
Nudt4	5.71339e-34	0.469995	0.942	0.752	1.59963e-29	E11.5-3
Naa50	2.98293e-42	0.469293	0.896	0.505	8.35162e-38	E11.5-3
Plk1	4.19744e-86	0.468873	0.462	0.032	1.1752e-81	E11.5-3
Skp2	3.24494e-81	0.468568	0.705	0.128	9.08517e-77	E11.5-3
Ptn	3.64868e-22	0.46842	0.988	0.781	1.02156e-17	E11.5-3
Notch1	1.79273e-127	0.466816	0.642	0.039	5.01928e-123	E11.5-3
Arl4a	1.39848e-32	0.46574	0.908	0.541	3.91546e-28	E11.5-3
Rab13	1.42219e-82	0.46568	0.728	0.138	3.98186e-78	E11.5-3
Cdca4	3.72363e-47	0.465596	0.792	0.319	1.04254e-42	E11.5-3
Hspa5	2.04962e-19	0.465163	0.96	0.843	5.73852e-15	E11.5-3
Pth1r	1.54827e-83	0.462215	0.682	0.112	4.33484e-79	E11.5-3
Scube1	9.01962e-58	0.460139	0.792	0.252	2.52531e-53	E11.5-3
Rhoa	8.93783e-39	0.459886	0.983	0.916	2.50241e-34	E11.5-3
Pdgfra	8.75281e-140	0.459605	0.613	0.026	2.45061e-135	E11.5-3
Lsm3	1.26358e-34	0.458699	0.96	0.829	3.53776e-30	E11.5-3
Rpl22l1	4.47775e-35	0.457414	1	0.988	1.25368e-30	E11.5-3
Ddost	5.20141e-29	0.457178	0.919	0.789	1.45629e-24	E11.5-3
Snhg18	1.34834e-93	0.456059	0.728	0.109	3.77507e-89	E11.5-3
Cmc2	4.73539e-40	0.455489	0.827	0.448	1.32582e-35	E11.5-3
Rpa3	1.52893e-42	0.454859	0.873	0.454	4.28069e-38	E11.5-3
Sf3b5	2.01242e-37	0.454578	0.977	0.862	5.63437e-33	E11.5-3
Rps18	7.44812e-64	0.453537	1	1	2.08533e-59	E11.5-3
Rps27	3.75237e-61	0.452918	1	1	1.05059e-56	E11.5-3
Ppia	4.46636e-64	0.452604	1	1	1.25049e-59	E11.5-3
Acadl	5.4145e-46	0.452418	0.734	0.269	1.51595e-41	E11.5-3
Rps23	1.58918e-70	0.452006	1	1	4.4494e-66	E11.5-3
Bub3	1.18043e-21	0.450546	0.936	0.84	3.30498e-17	E11.5-3
Kdelr1	5.78508e-38	0.449346	0.983	0.849	1.61971e-33	E11.5-3
Rbbp7	1.18314e-25	0.44918	0.925	0.73	3.31256e-21	E11.5-3
Sec61g	3.59754e-56	0.448997	1	0.998	1.00724e-51	E11.5-3
Manf	1.0772e-28	0.44793	0.988	0.897	3.01593e-24	E11.5-3
Cenpw	2.30223e-39	0.447789	0.723	0.303	6.44578e-35	E11.5-3
Fbxo5	6.80451e-103	0.447612	0.59	0.051	1.90513e-98	E11.5-3
Lix1	5.63459e-56	0.447296	0.555	0.111	1.57757e-51	E11.5-3
Tfpi	1.59494e-128	0.44712	0.636	0.039	4.46551e-124	E11.5-3
Snrpg	1.72035e-47	0.446906	0.994	0.981	4.81665e-43	E11.5-3
Nsmce4a	8.06133e-30	0.446396	0.902	0.655	2.25701e-25	E11.5-3
Stx4a	2.98496e-66	0.444137	0.74	0.184	8.35729e-62	E11.5-3
Ccnd1	1.52384e-90	0.443891	0.555	0.05	4.26646e-86	E11.5-3
Notch2	3.44604e-92	0.442471	0.491	0.034	9.64822e-88	E11.5-3
Rps19	2.34536e-66	0.441659	1	1	6.56653e-62	E11.5-3
Sfr1	2.3379e-37	0.441503	0.983	0.927	6.54566e-33	E11.5-3
Gypc	4.6101e-136	0.441201	0.688	0.046	1.29073e-131	E11.5-3
Wbp5	1.66467e-39	0.441036	0.994	0.986	4.66074e-35	E11.5-3
Tgif1	3.01682e-153	0.440785	0.659	0.026	8.44648e-149	E11.5-3
P3h4	1.39177e-59	0.440597	0.711	0.192	3.89668e-55	E11.5-3
Emg1	7.03436e-39	0.440457	0.977	0.763	1.96948e-34	E11.5-3
Elavl1	7.31185e-31	0.439561	0.913	0.7	2.04717e-26	E11.5-3
Rplp2	7.36334e-69	0.438814	1	1	2.06159e-64	E11.5-3
Edn3	7.24306e-147	0.438783	0.59	0.017	2.02791e-142	E11.5-3
Gm10076	1.03882e-36	0.438329	0.988	0.918	2.90849e-32	E11.5-3
Snrpd2	1.59811e-43	0.43816	1	0.981	4.47439e-39	E11.5-3
Rps8	2.63903e-74	0.43813	1	1	7.38875e-70	E11.5-3
Rpl23a	7.04268e-62	0.438095	1	1	1.97181e-57	E11.5-3
Ube2s	1.38127e-14	0.437823	0.994	0.992	3.86729e-10	E11.5-3
Lhfpl2	1.2554e-143	0.437807	0.63	0.026	3.51486e-139	E11.5-3
Trip6	3.8196e-111	0.434029	0.659	0.062	1.06941e-106	E11.5-3
Sar1a	2.27176e-36	0.433814	0.96	0.792	6.36047e-32	E11.5-3
Lsm6	2.08683e-35	0.433289	0.983	0.903	5.8427e-31	E11.5-3
Mmp14	3.60737e-63	0.432747	0.711	0.17	1.00999e-58	E11.5-3
Foxc2	1.48408e-110	0.432359	0.491	0.02	4.15512e-106	E11.5-3
Cmtm7	4.7165e-61	0.432096	0.763	0.201	1.32052e-56	E11.5-3
Emc8	2.39237e-37	0.431689	0.931	0.592	6.69817e-33	E11.5-3
Dhfr	6.98276e-69	0.431137	0.618	0.109	1.95503e-64	E11.5-3
Txnl1	2.43532e-31	0.430743	0.965	0.881	6.8184e-27	E11.5-3
Vim	1.17267e-16	0.430222	0.994	0.952	3.28324e-12	E11.5-3
Clic4	2.85462e-41	0.430126	0.855	0.434	7.99237e-37	E11.5-3
Gpx3	1.22317e-39	0.428949	0.815	0.377	3.42463e-35	E11.5-3
Ranbp1	2.69871e-38	0.428779	0.994	0.995	7.55586e-34	E11.5-3
Dkk2	6.10434e-94	0.428559	0.428	0.019	1.70909e-89	E11.5-3
Bmp4	2.68356e-116	0.427731	0.474	0.014	7.51342e-112	E11.5-3
Rpl10a	7.78169e-55	0.426999	1	1	2.17872e-50	E11.5-3
Tpd52l1	1.21638e-66	0.426541	0.676	0.145	3.40561e-62	E11.5-3
Tpcn1	1.31641e-92	0.425878	0.665	0.089	3.68568e-88	E11.5-3
Efnb2	4.26941e-51	0.42485	0.757	0.237	1.19535e-46	E11.5-3
Pabpc1	2.43976e-36	0.424599	1	0.988	6.83083e-32	E11.5-3
Rab3il1	1.37448e-55	0.424364	0.734	0.216	3.84826e-51	E11.5-3
Rpa2	3.43368e-57	0.423538	0.705	0.185	9.61361e-53	E11.5-3
Col18a1	6.78818e-121	0.423284	0.566	0.028	1.90055e-116	E11.5-3
Anapc11	6.66701e-38	0.423072	0.994	0.923	1.86663e-33	E11.5-3
Dut	1.18951e-20	0.422377	0.936	0.772	3.3304e-16	E11.5-3
Gab1	6.77179e-61	0.422263	0.636	0.138	1.89597e-56	E11.5-3
Tmed9	6.07867e-36	0.421917	0.96	0.886	1.70191e-31	E11.5-3
Rpl14	8.03082e-68	0.421803	1	1	2.24847e-63	E11.5-3
Gmds	3.9549e-46	0.421599	0.786	0.314	1.10729e-41	E11.5-3
Ifitm1	1.16789e-102	0.421481	0.422	0.012	3.26985e-98	E11.5-3
Rplp0	3.53243e-59	0.418516	1	1	9.89009e-55	E11.5-3
B2m	6.44113e-45	0.418478	0.913	0.486	1.80339e-40	E11.5-3
Ilk	7.15933e-32	0.416763	0.936	0.783	2.00447e-27	E11.5-3
Lyar	1.69922e-33	0.416667	0.89	0.586	4.75747e-29	E11.5-3
Rbpms2	2.15837e-87	0.416437	0.659	0.092	6.04299e-83	E11.5-3
Nes	8.54076e-54	0.416066	0.723	0.199	2.39124e-49	E11.5-3
Akap12	2.96299e-22	0.415958	0.873	0.608	8.29579e-18	E11.5-3
Cdk4	9.61909e-46	0.415706	0.994	1	2.69315e-41	E11.5-3
Wwtr1	9.37756e-166	0.414513	0.653	0.018	2.62553e-161	E11.5-3
Capn2	6.94033e-29	0.414205	0.89	0.615	1.94315e-24	E11.5-3
Mis18bp1	2.50121e-87	0.413592	0.503	0.042	7.00289e-83	E11.5-3
Psrc1	7.90618e-72	0.413558	0.468	0.048	2.21357e-67	E11.5-3
Zyx	3.02809e-30	0.413392	0.815	0.481	8.47805e-26	E11.5-3
Rps4x	6.22021e-55	0.412379	1	1	1.74153e-50	E11.5-3
Nid2	5.07861e-121	0.412235	0.561	0.028	1.42191e-116	E11.5-3
Serpinb6a	9.51617e-44	0.412149	0.775	0.327	2.66434e-39	E11.5-3
Mxd3	1.47269e-97	0.411823	0.561	0.047	4.12323e-93	E11.5-3
Islr	1.29108e-134	0.411763	0.659	0.039	3.61475e-130	E11.5-3
Rps5	1.78136e-67	0.411575	1	1	4.98745e-63	E11.5-3
Gltp	1.18969e-42	0.411399	0.803	0.343	3.33089e-38	E11.5-3
Nr2f2	4.35361e-29	0.411033	0.942	0.524	1.21892e-24	E11.5-3
Znrd1	1.79711e-33	0.411016	0.884	0.558	5.03156e-29	E11.5-3
Rpl27a	1.36895e-56	0.410972	1	1	3.8328e-52	E11.5-3
Cdc26	4.46703e-37	0.410677	0.977	0.851	1.25068e-32	E11.5-3
Racgap1	7.33664e-28	0.410229	0.618	0.275	2.05411e-23	E11.5-3
Mpp6	1.01452e-36	0.409745	0.711	0.297	2.84044e-32	E11.5-3
Emd	4.38009e-35	0.409659	0.936	0.697	1.22634e-30	E11.5-3
Bola3	5.63416e-39	0.409583	0.844	0.423	1.57745e-34	E11.5-3
Blvrb	6.96513e-74	0.408916	0.757	0.168	1.9501e-69	E11.5-3
Snai1	3.7501e-108	0.40868	0.526	0.029	1.04995e-103	E11.5-3
Rpl7	1.28395e-64	0.408538	1	1	3.5948e-60	E11.5-3
Chst2	9.18534e-43	0.407352	0.792	0.311	2.57171e-38	E11.5-3
Rdh10	1.63935e-82	0.407343	0.578	0.071	4.58986e-78	E11.5-3
Evi5	4.27883e-54	0.406701	0.688	0.196	1.19799e-49	E11.5-3
Phgdh	1.28357e-68	0.40667	0.624	0.108	3.59374e-64	E11.5-3
Tmem97	1.71137e-45	0.406493	0.682	0.221	4.79149e-41	E11.5-3
Npm3	2.47189e-31	0.406281	0.896	0.532	6.92081e-27	E11.5-3
Wdr86	9.34042e-155	0.406253	0.618	0.017	2.61513e-150	E11.5-3
Qpct	4.69406e-46	0.405389	0.578	0.147	1.31424e-41	E11.5-3
Hat1	2.1119e-36	0.40452	0.63	0.226	5.91291e-32	E11.5-3
Cenpq	6.24432e-86	0.403624	0.578	0.066	1.74829e-81	E11.5-3
Fam111a	1.1686e-50	0.403348	0.532	0.112	3.27184e-46	E11.5-3
Apoe	7.08185e-123	0.403047	0.867	0.137	1.98278e-118	E11.5-3
Itgb5	1.05756e-143	0.403015	0.613	0.022	2.96096e-139	E11.5-3
Fbn1	9.19533e-138	0.401532	0.618	0.029	2.57451e-133	E11.5-3
Cited1	5.54287e-77	0.401419	0.636	0.094	1.55189e-72	E11.5-3
Foxp2	1.56774e-47	0.400942	0.717	0.198	4.38937e-43	E11.5-3
Sh3bgrl3	3.56968e-33	0.400397	0.994	0.976	9.99438e-29	E11.5-3
Rfc2	6.48662e-31	0.400384	0.884	0.603	1.81612e-26	E11.5-3
Mcm6	9.61685e-51	0.399991	0.618	0.149	2.69253e-46	E11.5-3
Asph	3.57339e-44	0.398892	0.769	0.308	1.00048e-39	E11.5-3
Glo1	2.46248e-33	0.398535	0.925	0.648	6.89445e-29	E11.5-3
Rac1	1.27396e-36	0.398482	0.988	0.967	3.56683e-32	E11.5-3
Mcm5	4.65925e-63	0.39659	0.584	0.104	1.3045e-58	E11.5-3
Pold2	3.21237e-41	0.396495	0.723	0.283	8.99399e-37	E11.5-3
Cbx5	3.43452e-29	0.395853	0.983	0.865	9.61597e-25	E11.5-3
Rps27a	1.43516e-62	0.395352	1	1	4.01816e-58	E11.5-3
Plp2	6.11851e-34	0.395007	0.717	0.297	1.71306e-29	E11.5-3
Mesdc2	4.36355e-36	0.394507	0.89	0.522	1.22171e-31	E11.5-3
Rps14	4.47594e-61	0.392852	1	1	1.25317e-56	E11.5-3
Desi2	4.97922e-34	0.392719	0.798	0.408	1.39408e-29	E11.5-3
Prr5	9.45174e-35	0.392641	0.821	0.406	2.6463e-30	E11.5-3
Zfyve21	1.25344e-63	0.392622	0.705	0.159	3.50939e-59	E11.5-3
Prkd3	5.01505e-65	0.392247	0.734	0.174	1.40411e-60	E11.5-3
Rap1a	3.65747e-30	0.392085	0.936	0.728	1.02402e-25	E11.5-3
Ska1	1.81231e-103	0.391104	0.538	0.036	5.0741e-99	E11.5-3
S1pr2	1.77385e-68	0.390929	0.671	0.134	4.96641e-64	E11.5-3
Chchd7	7.11584e-30	0.390646	0.896	0.566	1.99229e-25	E11.5-3
Tsen15	1.68191e-63	0.389355	0.636	0.131	4.709e-59	E11.5-3
Fam114a1	2.53957e-123	0.388607	0.607	0.036	7.1103e-119	E11.5-3
Smo	1.21031e-77	0.388087	0.786	0.159	3.38861e-73	E11.5-3
Cdo1	3.44208e-26	0.387166	0.815	0.433	9.63713e-22	E11.5-3
Loxl2	3.32735e-89	0.386815	0.618	0.072	9.31591e-85	E11.5-3
Lman1	1.89492e-36	0.386637	0.809	0.399	5.3054e-32	E11.5-3
Rps25	3.78549e-50	0.386437	1	1	1.05986e-45	E11.5-3
Uqcr10	9.37462e-31	0.385559	0.988	0.961	2.62471e-26	E11.5-3
Anp32e	1.08274e-23	0.385531	0.913	0.742	3.03146e-19	E11.5-3
Uaca	2.74216e-95	0.385179	0.555	0.048	7.67749e-91	E11.5-3
Plin3	8.16361e-56	0.384418	0.699	0.18	2.28565e-51	E11.5-3
Rap1b	6.02641e-30	0.38419	0.977	0.836	1.68727e-25	E11.5-3
Gramd3	2.09771e-125	0.384068	0.572	0.027	5.87316e-121	E11.5-3
Alyref	1.81003e-30	0.383966	0.879	0.605	5.06773e-26	E11.5-3
Hsd17b10	1.54381e-23	0.383455	0.954	0.765	4.32235e-19	E11.5-3
Pbdc1	1.36696e-34	0.382994	0.873	0.479	3.82722e-30	E11.5-3
Sept9	5.11405e-27	0.382935	0.948	0.719	1.43183e-22	E11.5-3
Fam92a	5.31142e-29	0.382702	0.942	0.644	1.48709e-24	E11.5-3
Fgfr1	1.48375e-29	0.38255	0.769	0.386	4.15421e-25	E11.5-3
Fermt2	1.56444e-40	0.382271	0.711	0.263	4.38013e-36	E11.5-3
Egr1	1.03462e-43	0.381617	0.434	0.078	2.89672e-39	E11.5-3
Srsf2	2.9566e-30	0.38147	0.994	0.992	8.27789e-26	E11.5-3
Grn	1.11879e-44	0.381016	0.694	0.235	3.1324e-40	E11.5-3
P3h3	2.84816e-73	0.381014	0.642	0.109	7.97429e-69	E11.5-3
Rassf8	1.14884e-104	0.380695	0.578	0.044	3.21653e-100	E11.5-3
Tmed2	1.33521e-32	0.380658	0.994	0.966	3.73831e-28	E11.5-3
A430005L14Rik	6.04497e-35	0.380007	0.78	0.379	1.69247e-30	E11.5-3
Tmem100	3.25167e-58	0.37984	0.468	0.069	9.10403e-54	E11.5-3
Rpl18a	2.18647e-59	0.379734	1	1	6.12167e-55	E11.5-3
Mrpl17	4.58898e-31	0.378672	0.936	0.735	1.28482e-26	E11.5-3
Kif26b	1.32128e-62	0.378501	0.647	0.131	3.69931e-58	E11.5-3
Hebp1	2.61753e-77	0.377291	0.618	0.092	7.32856e-73	E11.5-3
Slc38a4	2.29408e-134	0.375881	0.595	0.026	6.42295e-130	E11.5-3
Rpl37a	1.10702e-57	0.375506	1	1	3.09942e-53	E11.5-3
Nudt9	1.0467e-26	0.375207	0.879	0.587	2.93055e-22	E11.5-3
Polr2e	8.94053e-30	0.375144	0.965	0.826	2.50317e-25	E11.5-3
Lpp	9.09304e-68	0.374488	0.642	0.122	2.54587e-63	E11.5-3
Nfia	3.25104e-56	0.373885	0.549	0.103	9.10226e-52	E11.5-3
Elk3	5.19447e-132	0.373529	0.578	0.023	1.45435e-127	E11.5-3
Gemin7	4.23854e-27	0.372425	0.971	0.801	1.18671e-22	E11.5-3
Rpl8	2.65897e-53	0.371922	1	1	7.44458e-49	E11.5-3
Btf3	2.13534e-52	0.371889	1	1	5.97852e-48	E11.5-3
Arl1	7.6616e-28	0.371745	0.988	0.85	2.14509e-23	E11.5-3
Bmpr1a	3.79221e-46	0.371564	0.751	0.26	1.06174e-41	E11.5-3
Tsen34	1.85514e-24	0.371236	0.988	0.905	5.19403e-20	E11.5-3
Eif2s2	1.30132e-28	0.370953	0.994	0.949	3.64344e-24	E11.5-3
Rspo3	3.74553e-84	0.370613	0.468	0.034	1.04867e-79	E11.5-3
Phf5a	6.4092e-29	0.370224	0.977	0.908	1.79445e-24	E11.5-3
Pbk	1.44098e-113	0.369866	0.555	0.03	4.03445e-109	E11.5-3
Ccdc102a	5.94244e-143	0.369531	0.584	0.018	1.66376e-138	E11.5-3
Lbr	4.77049e-55	0.368518	0.647	0.158	1.33564e-50	E11.5-3
Ndufb4	8.74885e-27	0.368215	0.994	0.819	2.4495e-22	E11.5-3
Pcna	2.28149e-22	0.368198	0.642	0.317	6.38771e-18	E11.5-3
Odc1	4.86566e-18	0.367492	0.89	0.736	1.36229e-13	E11.5-3
Crispld1	2.67989e-85	0.366987	0.561	0.062	7.50316e-81	E11.5-3
Mgst1	1.68664e-89	0.366746	0.584	0.061	4.72226e-85	E11.5-3
Incenp	1.30443e-69	0.366538	0.584	0.094	3.65214e-65	E11.5-3
Scarf2	1.5676e-138	0.366288	0.584	0.02	4.38897e-134	E11.5-3
Ngfr	2.00586e-20	0.365885	0.647	0.304	5.61601e-16	E11.5-3
Meox2	4.12468e-114	0.36566	0.457	0.012	1.15483e-109	E11.5-3
Actn4	1.04531e-29	0.365465	0.803	0.443	2.92665e-25	E11.5-3
Actn1	1.50215e-49	0.365448	0.607	0.154	4.20573e-45	E11.5-3
Axl	6.23529e-129	0.365171	0.578	0.026	1.74576e-124	E11.5-3
Zcchc24	1.42265e-129	0.364572	0.555	0.02	3.98313e-125	E11.5-3
Mylip	4.26687e-93	0.364409	0.468	0.028	1.19464e-88	E11.5-3
Nxt1	7.38391e-34	0.364195	0.827	0.429	2.06735e-29	E11.5-3
Tmem263	1.99221e-38	0.363966	0.74	0.29	5.5778e-34	E11.5-3
Litaf	1.25586e-61	0.36308	0.642	0.129	3.51617e-57	E11.5-3
Rps13	6.44153e-63	0.362977	1	1	1.8035e-58	E11.5-3
Gm10073	1.34902e-26	0.36258	0.925	0.639	3.777e-22	E11.5-3
Bccip	3.99484e-28	0.362245	0.832	0.506	1.11848e-23	E11.5-3
Rps17	1.56456e-54	0.362118	1	1	4.38045e-50	E11.5-3
Etfa	3.05089e-36	0.362062	0.85	0.393	8.54187e-32	E11.5-3
Necap2	1.34917e-64	0.361783	0.688	0.148	3.77741e-60	E11.5-3
Rdx	1.1843e-24	0.361245	0.954	0.817	3.31581e-20	E11.5-3
Slbp	3.60463e-18	0.361107	0.855	0.67	1.00922e-13	E11.5-3
Chmp2b	4.18593e-51	0.360828	0.688	0.202	1.17198e-46	E11.5-3
Fam101a	2.26026e-97	0.359626	0.491	0.031	6.32827e-93	E11.5-3
Sae1	1.07914e-22	0.359604	0.896	0.748	3.02138e-18	E11.5-3
Hspe1	8.6762e-27	0.359597	0.994	0.983	2.42916e-22	E11.5-3
Sep15	1.38199e-33	0.359571	0.988	0.978	3.8693e-29	E11.5-3
Itm2c	4.15115e-27	0.359302	0.948	0.717	1.16224e-22	E11.5-3
Plekhg2	2.6984e-53	0.359047	0.647	0.159	7.55497e-49	E11.5-3
Trim59	8.47394e-36	0.359026	0.653	0.247	2.37253e-31	E11.5-3
Itgb3bp	2.38838e-43	0.35865	0.676	0.221	6.68699e-39	E11.5-3
Casp6	1.09779e-34	0.35803	0.647	0.254	3.07359e-30	E11.5-3
Hnrnpd	1.35686e-28	0.357785	0.977	0.85	3.79893e-24	E11.5-3
Ppih	3.4276e-27	0.35746	0.792	0.463	9.59659e-23	E11.5-3
Map2k3	5.04818e-66	0.357239	0.734	0.175	1.41339e-61	E11.5-3
Spcs1	4.04448e-27	0.357104	0.983	0.928	1.13237e-22	E11.5-3
Rpl30	1.20227e-49	0.357024	1	0.999	3.36612e-45	E11.5-3
Sgol1	7.60149e-100	0.356923	0.503	0.03	2.12827e-95	E11.5-3
Ddr2	2.37303e-141	0.35685	0.601	0.022	6.64402e-137	E11.5-3
Vstm2b	5.22194e-32	0.356688	0.607	0.209	1.46204e-27	E11.5-3
Srsf7	2.15516e-24	0.356262	0.983	0.954	6.03401e-20	E11.5-3
Rad51	5.58848e-83	0.356212	0.526	0.052	1.56466e-78	E11.5-3
Cd164	2.20662e-40	0.355953	0.74	0.266	6.17809e-36	E11.5-3
Fundc2	6.98083e-27	0.355433	0.948	0.778	1.95449e-22	E11.5-3
Rps11	3.38543e-57	0.355306	1	1	9.47852e-53	E11.5-3
Cdk2	3.16783e-87	0.355188	0.514	0.044	8.8693e-83	E11.5-3
Exosc8	6.83141e-29	0.354986	0.821	0.458	1.91266e-24	E11.5-3
Ssr4	9.6624e-27	0.354759	0.971	0.858	2.70528e-22	E11.5-3
Rfc5	1.6791e-41	0.354667	0.694	0.232	4.70115e-37	E11.5-3
Cenph	2.13179e-64	0.354292	0.578	0.097	5.96858e-60	E11.5-3
Rps3a1	5.0432e-47	0.353759	1	1	1.41199e-42	E11.5-3
Cdca7	1.17546e-86	0.353621	0.549	0.054	3.29106e-82	E11.5-3
Trp53	1.36723e-21	0.353448	0.867	0.642	3.82796e-17	E11.5-3
Col6a3	7.01394e-104	0.353394	0.486	0.023	1.96376e-99	E11.5-3
Banf1	6.74472e-22	0.352998	0.931	0.836	1.88839e-17	E11.5-3
Tgif2	4.44486e-89	0.352951	0.59	0.06	1.24447e-84	E11.5-3
Rps21	1.98601e-43	0.352744	1	1	5.56043e-39	E11.5-3
Hnrnpa3	1.11677e-28	0.352631	1	0.989	3.12672e-24	E11.5-3
Trip13	2.10976e-50	0.352303	0.572	0.131	5.9069e-46	E11.5-3
Bicc1	1.46924e-121	0.351719	0.584	0.032	4.11357e-117	E11.5-3
Snrpa1	1.15962e-21	0.351618	0.925	0.711	3.24671e-17	E11.5-3
Tcf19	2.38634e-71	0.351364	0.468	0.05	6.68126e-67	E11.5-3
Hddc2	1.00974e-33	0.350981	0.792	0.384	2.82706e-29	E11.5-3
Ppfibp1	1.72813e-73	0.350976	0.63	0.101	4.83841e-69	E11.5-3
Pttg1ip	8.10356e-43	0.350286	0.775	0.298	2.26883e-38	E11.5-3
Plat	3.15594e-63	0.350055	0.549	0.091	8.836e-59	E11.5-3
Rpl23	1.31957e-57	0.349685	1	1	3.69452e-53	E11.5-3
Mydgf	3.23346e-26	0.349651	0.965	0.718	9.05304e-22	E11.5-3
Rarg	1.99725e-120	0.349073	0.52	0.02	5.59189e-116	E11.5-3
Efna4	8.74324e-55	0.349063	0.676	0.172	2.44793e-50	E11.5-3
Srsf3	4.23934e-31	0.349024	1	0.998	1.18693e-26	E11.5-3
Kif22	6.94378e-54	0.348967	0.451	0.07	1.94412e-49	E11.5-3
Creb3l2	5.03387e-120	0.348674	0.584	0.033	1.40938e-115	E11.5-3
Itga11	8.47037e-99	0.348334	0.491	0.029	2.37153e-94	E11.5-3
Hmmr	1.73142e-92	0.347972	0.445	0.023	4.84762e-88	E11.5-3
Ctsz	1.01287e-28	0.34743	0.855	0.518	2.83582e-24	E11.5-3
Rpl17	1.73545e-52	0.347418	1	1	4.8589e-48	E11.5-3
Kank2	2.60776e-131	0.347272	0.549	0.018	7.3012e-127	E11.5-3
Snx5	8.69242e-31	0.347152	0.884	0.54	2.4337e-26	E11.5-3
Tmem39a	2.06814e-67	0.346969	0.676	0.134	5.79037e-63	E11.5-3
Aamdc	3.91631e-41	0.346936	0.746	0.266	1.09649e-36	E11.5-3
E2f5	3.85109e-40	0.346525	0.757	0.282	1.07823e-35	E11.5-3
Eci2	1.10537e-23	0.345899	0.925	0.734	3.0948e-19	E11.5-3
Sept11	3.50096e-21	0.345895	0.948	0.792	9.80198e-17	E11.5-3
Prelid1	7.95294e-33	0.345881	0.994	0.986	2.22666e-28	E11.5-3
Mrps14	1.09244e-26	0.345774	0.96	0.826	3.0586e-22	E11.5-3
Mtap	4.63639e-49	0.344619	0.694	0.211	1.2981e-44	E11.5-3
Amotl1	1.17779e-35	0.344158	0.688	0.262	3.29759e-31	E11.5-3
Mcm3	1.67634e-87	0.344122	0.486	0.036	4.69342e-83	E11.5-3
Cdca2	6.3393e-94	0.34405	0.462	0.026	1.77488e-89	E11.5-3
Nr2f6	1.93511e-26	0.344013	0.838	0.53	5.41791e-22	E11.5-3
Tm4sf1	1.20923e-89	0.343597	0.37	0.011	3.38559e-85	E11.5-3
Ets1	2.82708e-87	0.343479	0.549	0.052	7.91525e-83	E11.5-3
Tcea3	4.29989e-99	0.34298	0.387	0.008	1.20388e-94	E11.5-3
Vkorc1	9.75009e-36	0.342739	0.705	0.282	2.72983e-31	E11.5-3
Dusp6	2.58686e-39	0.342602	0.555	0.148	7.2427e-35	E11.5-3
Tspan9	1.40377e-64	0.34254	0.659	0.132	3.93026e-60	E11.5-3
Agpat2	9.50028e-102	0.34229	0.555	0.04	2.65989e-97	E11.5-3
Pear1	2.11162e-133	0.341705	0.532	0.014	5.91211e-129	E11.5-3
Luzp1	2.38511e-29	0.341331	0.763	0.374	6.67783e-25	E11.5-3
Creb3l1	2.14008e-89	0.341083	0.52	0.045	5.9918e-85	E11.5-3
Snrpd1	3.14809e-28	0.340871	0.988	0.977	8.81402e-24	E11.5-3
Naa20	6.73805e-24	0.340096	0.867	0.61	1.88652e-19	E11.5-3
Anxa3	2.27602e-111	0.340018	0.595	0.042	6.37241e-107	E11.5-3
Rps9	3.592e-60	0.33978	1	1	1.00569e-55	E11.5-3
Timp2	2.05394e-31	0.339643	0.746	0.315	5.75063e-27	E11.5-3
Ndufa2	3.59852e-31	0.338518	0.994	0.991	1.00751e-26	E11.5-3
Ube2i	1.36393e-28	0.338175	1	0.965	3.81874e-24	E11.5-3
Mrpl51	1.67651e-23	0.338132	0.983	0.862	4.6939e-19	E11.5-3
Calr	9.52997e-15	0.337798	1	0.965	2.6682e-10	E11.5-3
Kif11	2.90843e-100	0.337165	0.486	0.026	8.14301e-96	E11.5-3
Elovl1	9.99586e-33	0.336407	0.711	0.297	2.79864e-28	E11.5-3
Rfc4	5.09387e-24	0.336388	0.694	0.371	1.42618e-19	E11.5-3
Tmed3	2.33083e-29	0.336297	0.78	0.395	6.52585e-25	E11.5-3
Ccnf	4.05194e-53	0.335636	0.405	0.054	1.13446e-48	E11.5-3
Hist1h4i	6.93544e-51	0.335428	0.653	0.17	1.94178e-46	E11.5-3
Rpl21	2.05363e-57	0.335378	1	1	5.74977e-53	E11.5-3
Stra13	6.49624e-21	0.334989	0.908	0.715	1.81882e-16	E11.5-3
Lama1	1.23146e-97	0.334161	0.578	0.05	3.44783e-93	E11.5-3
Nup37	3.36119e-43	0.334103	0.624	0.187	9.41066e-39	E11.5-3
Hic1	5.0476e-99	0.333821	0.416	0.014	1.41323e-94	E11.5-3
Rpl9	9.75096e-57	0.333637	1	1	2.73007e-52	E11.5-3
Pkn2	4.67314e-32	0.333637	0.792	0.377	1.30839e-27	E11.5-3
Rpl10	4.59506e-52	0.333544	1	1	1.28653e-47	E11.5-3
Dse	8.92247e-62	0.332734	0.618	0.125	2.49811e-57	E11.5-3
Arhgef40	5.1671e-47	0.332687	0.699	0.215	1.44668e-42	E11.5-3
Rpl18	6.05977e-50	0.332665	1	1	1.69661e-45	E11.5-3
Frmd6	1.16707e-79	0.331948	0.543	0.063	3.26756e-75	E11.5-3
Plk4	3.81942e-53	0.331742	0.578	0.124	1.06936e-48	E11.5-3
Lsm8	8.00078e-23	0.331621	0.919	0.811	2.24006e-18	E11.5-3
Rer1	3.04649e-23	0.331379	0.965	0.907	8.52957e-19	E11.5-3
Dbf4	1.33421e-25	0.331113	0.601	0.254	3.73551e-21	E11.5-3
Tmem176a	8.69262e-25	0.33094	0.723	0.369	2.43376e-20	E11.5-3
Tbrg1	6.18272e-18	0.330828	0.902	0.767	1.73104e-13	E11.5-3
Gas1	3.27389e-82	0.330822	0.48	0.038	9.16624e-78	E11.5-3
Mkx	4.71486e-104	0.330814	0.497	0.026	1.32007e-99	E11.5-3
Cdk2ap1	4.40635e-23	0.33051	0.913	0.734	1.23369e-18	E11.5-3
Ccne1	3.13443e-42	0.330193	0.434	0.084	8.77577e-38	E11.5-3
Rbpms	2.26831e-92	0.329736	0.543	0.048	6.35081e-88	E11.5-3
Lrrc59	5.38323e-21	0.3297	0.977	0.903	1.5072e-16	E11.5-3
Marcks	1.18421e-28	0.329128	1	1	3.31555e-24	E11.5-3
Lage3	1.93456e-26	0.329021	0.832	0.5	5.41639e-22	E11.5-3
Ppp4c	3.60407e-26	0.328642	0.977	0.915	1.00907e-21	E11.5-3
Mbnl2	1.95861e-33	0.328484	0.665	0.245	5.48372e-29	E11.5-3
Apoa2	6.5448e-53	0.327843	0.526	0.102	1.83241e-48	E11.5-3
Slc43a3	2.81751e-93	0.327742	0.52	0.041	7.88848e-89	E11.5-3
Rpl23a-ps3	3.27132e-24	0.327442	0.936	0.802	9.15904e-20	E11.5-3
Tspo	1.70004e-62	0.327164	0.578	0.102	4.75978e-58	E11.5-3
Fam162a	2.1041e-23	0.327077	0.913	0.675	5.89106e-19	E11.5-3
Lamb1	1.03617e-118	0.326897	0.52	0.021	2.90107e-114	E11.5-3
Cyr61	1.92205e-83	0.326754	0.387	0.017	5.38135e-79	E11.5-3
Rpl24	7.5548e-51	0.326456	1	1	2.11519e-46	E11.5-3
Smco4	6.88781e-57	0.326379	0.52	0.091	1.92845e-52	E11.5-3
Suclg2	1.65737e-59	0.326342	0.595	0.114	4.64031e-55	E11.5-3
U2af1	1.3953e-26	0.325857	0.988	0.966	3.90655e-22	E11.5-3
Hells	3.52766e-63	0.325638	0.503	0.072	9.87673e-59	E11.5-3
Fzd2	9.69261e-77	0.325318	0.538	0.06	2.71374e-72	E11.5-3
Ramp2	6.0147e-36	0.325308	0.405	0.086	1.68399e-31	E11.5-3
Plscr1	1.46125e-50	0.325148	0.566	0.12	4.09122e-46	E11.5-3
Cnep1r1	1.3233e-22	0.325096	0.757	0.448	3.70498e-18	E11.5-3
Cbx1	1.82977e-22	0.324826	0.988	0.885	5.12299e-18	E11.5-3
Olfml3	4.20494e-100	0.324551	0.526	0.035	1.1773e-95	E11.5-3
Arhgap20	6.77599e-64	0.324348	0.538	0.077	1.89714e-59	E11.5-3
Ctnna1	3.18717e-30	0.323138	0.775	0.375	8.92345e-26	E11.5-3
Tmem45a	4.82703e-133	0.323057	0.538	0.016	1.35147e-128	E11.5-3
Phlda3	3.43789e-37	0.322161	0.48	0.121	9.6254e-33	E11.5-3
Dpy30	1.32746e-22	0.322062	0.965	0.842	3.71661e-18	E11.5-3
2810004N23Rik	7.54972e-33	0.32173	0.786	0.362	2.11377e-28	E11.5-3
Sh3gl1	1.21413e-23	0.321231	0.792	0.497	3.39931e-19	E11.5-3
Tceal8	1.0902e-23	0.321012	0.988	0.906	3.05235e-19	E11.5-3
Ndufa13	7.98601e-22	0.321011	1	0.971	2.23592e-17	E11.5-3
Zfp362	2.03405e-30	0.319715	0.676	0.288	5.69492e-26	E11.5-3
Vcl	7.31263e-72	0.319693	0.647	0.113	2.04739e-67	E11.5-3
Tnfaip1	5.06503e-22	0.319209	0.936	0.689	1.41811e-17	E11.5-3
Egfr	7.34824e-112	0.319047	0.48	0.017	2.05736e-107	E11.5-3
Immp1l	7.03413e-21	0.318994	0.925	0.755	1.96942e-16	E11.5-3
Ror2	3.22003e-47	0.318784	0.555	0.13	9.01545e-43	E11.5-3
Chmp4b	1.18506e-23	0.318701	0.977	0.857	3.31793e-19	E11.5-3
Rps28	1.05502e-40	0.318371	1	1	2.95385e-36	E11.5-3
Larp7	3.25118e-25	0.318231	0.775	0.437	9.10266e-21	E11.5-3
Ghr	7.56076e-106	0.317568	0.532	0.032	2.11686e-101	E11.5-3
Naca	2.94253e-46	0.316782	1	1	8.23851e-42	E11.5-3
Chst14	2.2675e-120	0.31631	0.532	0.021	6.34853e-116	E11.5-3
Prim1	1.10848e-49	0.315903	0.538	0.113	3.10352e-45	E11.5-3
Chaf1a	2.54302e-63	0.315651	0.566	0.092	7.11995e-59	E11.5-3
Smim11	8.98334e-30	0.314931	0.809	0.436	2.51515e-25	E11.5-3
Ctnnb1	2.1756e-21	0.314906	0.983	0.91	6.09125e-17	E11.5-3
Asf1a	1.56187e-19	0.314685	0.844	0.628	4.37292e-15	E11.5-3
Tgfbi	1.13392e-74	0.314379	0.376	0.022	3.17475e-70	E11.5-3
Utp11l	6.0981e-25	0.313859	0.884	0.59	1.70735e-20	E11.5-3
Mrpl42	4.68396e-18	0.313826	0.988	0.886	1.31142e-13	E11.5-3
Ssrp1	2.01673e-12	0.313681	0.89	0.811	5.64644e-08	E11.5-3
Rfc1	7.97108e-29	0.31342	0.757	0.344	2.23174e-24	E11.5-3
Prom1	8.87034e-48	0.313238	0.52	0.106	2.48352e-43	E11.5-3
Kpna2	1.71286e-11	0.31318	0.526	0.327	4.79567e-07	E11.5-3
Tax1bp3	9.56298e-21	0.312466	0.988	0.927	2.67744e-16	E11.5-3
Nme4	1.2171e-28	0.311848	0.676	0.297	3.40763e-24	E11.5-3
Tpd52l2	1.3509e-21	0.311631	0.884	0.691	3.78226e-17	E11.5-3
Nab1	3.72283e-60	0.311217	0.578	0.106	1.04232e-55	E11.5-3
Mfge8	1.31454e-48	0.310348	0.601	0.143	3.68044e-44	E11.5-3
Ezh2	4.05333e-16	0.310201	0.879	0.718	1.13485e-11	E11.5-3
Zic2	7.17237e-106	0.309959	0.497	0.025	2.00812e-101	E11.5-3
Acaa2	7.00051e-35	0.309753	0.665	0.255	1.96e-30	E11.5-3
Tpt1	1.84028e-52	0.30954	1	1	5.15241e-48	E11.5-3
Tcf7l1	7.38442e-83	0.309138	0.549	0.058	2.06749e-78	E11.5-3
Rad51ap1	1.30563e-70	0.308837	0.503	0.06	3.65551e-66	E11.5-3
Trp53i13	2.63084e-61	0.307745	0.566	0.098	7.36583e-57	E11.5-3
Qk	1.85799e-25	0.307282	0.786	0.388	5.202e-21	E11.5-3
Stoml2	1.82806e-21	0.307275	0.913	0.698	5.11821e-17	E11.5-3
Creld2	1.00887e-24	0.30702	0.699	0.342	2.82463e-20	E11.5-3
Hmbs	7.65134e-19	0.305449	0.815	0.591	2.14222e-14	E11.5-3
Plxnb2	1.88565e-30	0.305354	0.74	0.322	5.27945e-26	E11.5-3
Egfl6	1.81224e-94	0.305019	0.422	0.017	5.07391e-90	E11.5-3
Rpl5	1.57169e-32	0.3049	1	1	4.40042e-28	E11.5-3
Rhog	1.0209e-61	0.304884	0.572	0.1	2.85832e-57	E11.5-3
Reep4	2.18137e-34	0.304644	0.52	0.154	6.10739e-30	E11.5-3
Hdac1	1.06913e-16	0.304214	0.809	0.546	2.99334e-12	E11.5-3
Fau	4.56087e-45	0.30417	1	1	1.27695e-40	E11.5-3
Nuf2	3.43188e-91	0.303755	0.491	0.034	9.60857e-87	E11.5-3
Oaz1	1.54287e-38	0.303719	1	1	4.31972e-34	E11.5-3
Fam96a	2.3914e-20	0.303489	0.977	0.825	6.69545e-16	E11.5-3
0610007P14Rik	3.27001e-20	0.303431	0.879	0.648	9.15538e-16	E11.5-3
Sypl	8.34106e-52	0.303113	0.607	0.14	2.33533e-47	E11.5-3
Irs1	6.25249e-55	0.302838	0.595	0.127	1.75057e-50	E11.5-3
Itga9	1.88271e-84	0.302188	0.584	0.072	5.27121e-80	E11.5-3
Rps10	8.16026e-42	0.301308	1	1	2.28471e-37	E11.5-3
Rpl19	3.12309e-45	0.300959	1	1	8.74402e-41	E11.5-3
Apip	9.56683e-24	0.300114	0.734	0.388	2.67852e-19	E11.5-3
Tex30	1.03633e-22	0.299688	0.647	0.322	2.90151e-18	E11.5-3
Stx18	1.84501e-31	0.299669	0.705	0.293	5.16566e-27	E11.5-3
Mme	4.71861e-122	0.299465	0.48	0.011	1.32112e-117	E11.5-3
E2f4	2.28246e-21	0.299237	0.821	0.535	6.39043e-17	E11.5-3
Zfp703	1.04997e-28	0.298958	0.526	0.176	2.93972e-24	E11.5-3
Cdkn3	2.92913e-48	0.298938	0.399	0.058	8.20097e-44	E11.5-3
Ugp2	7.91883e-19	0.298875	0.78	0.543	2.21711e-14	E11.5-3
Rps24	8.9806e-48	0.298266	1	1	2.51439e-43	E11.5-3
Kif23	2.64173e-67	0.298223	0.405	0.035	7.39632e-63	E11.5-3
Dynll1	1.24937e-17	0.297975	1	1	3.49798e-13	E11.5-3
Nsmce2	2.1979e-20	0.297914	0.803	0.571	6.15369e-16	E11.5-3
Cdv3	3.25744e-19	0.29631	0.971	0.86	9.12018e-15	E11.5-3
Xrcc1	3.17972e-27	0.296087	0.711	0.331	8.90259e-23	E11.5-3
Eml4	5.74992e-22	0.29595	0.694	0.365	1.60986e-17	E11.5-3
Cenpn	9.50253e-61	0.295325	0.503	0.075	2.66052e-56	E11.5-3
G3bp1	2.82132e-16	0.295248	0.971	0.928	7.89913e-12	E11.5-3
Tuba1c	2.87499e-45	0.295246	0.399	0.063	8.0494e-41	E11.5-3
Rpl26	5.36558e-44	0.295075	1	1	1.50225e-39	E11.5-3
Ephb4	3.67843e-104	0.294723	0.491	0.024	1.02989e-99	E11.5-3
Arpp19	1.11479e-18	0.294618	0.988	0.949	3.12118e-14	E11.5-3
Brd7	1.99642e-15	0.294068	0.832	0.609	5.58957e-11	E11.5-3
Kif20a	9.8056e-64	0.293299	0.399	0.037	2.74537e-59	E11.5-3
Pdia3	1.65382e-11	0.293185	0.977	0.943	4.63035e-07	E11.5-3
Mrpl18	7.43739e-20	0.293168	0.965	0.885	2.08232e-15	E11.5-3
B4galt4	1.71303e-29	0.293105	0.578	0.208	4.79614e-25	E11.5-3
Rpl32	5.02844e-37	0.292699	1	1	1.40786e-32	E11.5-3
Lamp2	1.11287e-28	0.292152	0.734	0.34	3.11581e-24	E11.5-3
Txndc12	1.05703e-22	0.292088	0.78	0.454	2.95948e-18	E11.5-3
Pard6g	1.91187e-15	0.292036	0.838	0.608	5.35284e-11	E11.5-3
Wnt5a	8.64224e-105	0.292029	0.514	0.028	2.41965e-100	E11.5-3
Tmem55a	3.60509e-20	0.291644	0.832	0.527	1.00935e-15	E11.5-3
Klf6	1.03092e-14	0.29164	0.931	0.721	2.88636e-10	E11.5-3
Syce2	1.82158e-59	0.291548	0.52	0.08	5.10006e-55	E11.5-3
Pnrc2	1.81641e-16	0.290542	0.844	0.592	5.08558e-12	E11.5-3
Twist2	1.08092e-104	0.290249	0.457	0.017	3.02635e-100	E11.5-3
Dad1	3.80009e-17	0.289544	0.988	0.934	1.06395e-12	E11.5-3
Gorasp2	1.27203e-20	0.289162	0.896	0.677	3.56143e-16	E11.5-3
Snrpe	1.18006e-25	0.289116	1	0.996	3.30393e-21	E11.5-3
Dnajc10	2.66923e-22	0.288849	0.792	0.472	7.47331e-18	E11.5-3
Myh10	2.77802e-16	0.288583	0.89	0.723	7.77789e-12	E11.5-3
Cbfb	5.3274e-22	0.288505	0.867	0.539	1.49157e-17	E11.5-3
Ptgr1	1.5258e-76	0.288272	0.428	0.032	4.27193e-72	E11.5-3
Lzic	4.39856e-23	0.287628	0.711	0.366	1.23151e-18	E11.5-3
Mcm2	7.76345e-26	0.287555	0.526	0.19	2.17361e-21	E11.5-3
Jag1	9.01986e-17	0.287508	0.405	0.156	2.52538e-12	E11.5-3
Mycbp	1.73474e-29	0.287243	0.694	0.291	4.85693e-25	E11.5-3
Ppfibp2	2.21296e-74	0.28705	0.451	0.04	6.19584e-70	E11.5-3
Psma5	7.36259e-20	0.286749	0.983	0.94	2.06138e-15	E11.5-3
Krcc1	1.24594e-20	0.286442	0.809	0.465	3.48838e-16	E11.5-3
Wipi1	2.93955e-51	0.286355	0.514	0.097	8.23015e-47	E11.5-3
Alcam	1.0978e-39	0.285853	0.815	0.265	3.07362e-35	E11.5-3
Flnc	1.40969e-118	0.285777	0.491	0.015	3.94685e-114	E11.5-3
Aars	4.6134e-19	0.285577	0.884	0.682	1.29166e-14	E11.5-3
Fmo1	4.91863e-109	0.285546	0.434	0.011	1.37712e-104	E11.5-3
Apitd1	6.17017e-34	0.285526	0.578	0.181	1.72752e-29	E11.5-3
Timp1	1.03462e-91	0.285514	0.422	0.019	2.89674e-87	E11.5-3
Dusp7	2.5298e-40	0.28528	0.561	0.153	7.08293e-36	E11.5-3
Syngr2	4.35331e-88	0.285256	0.491	0.036	1.21884e-83	E11.5-3
Yif1a	6.82293e-20	0.284793	0.78	0.478	1.91028e-15	E11.5-3
Mif4gd	2.48302e-72	0.284545	0.497	0.057	6.95196e-68	E11.5-3
1500009L16Rik	1.84142e-19	0.284277	0.879	0.589	5.15562e-15	E11.5-3
Dnajc15	4.31491e-17	0.284237	0.798	0.549	1.20809e-12	E11.5-3
Rnaseh2b	4.26967e-23	0.284143	0.786	0.463	1.19542e-18	E11.5-3
Tpm3	7.10639e-16	0.284024	0.965	0.906	1.98965e-11	E11.5-3
Synpo	2.02118e-70	0.28401	0.526	0.065	5.65889e-66	E11.5-3
Peg3	2.90134e-08	0.283901	0.908	0.805	0.000812318	E11.5-3
Exosc3	1.45965e-29	0.283347	0.63	0.254	4.08672e-25	E11.5-3
Cit	3.64889e-35	0.283335	0.474	0.121	1.02162e-30	E11.5-3
Klf13	1.07824e-16	0.28274	0.908	0.648	3.01886e-12	E11.5-3
Tnfaip6	3.12282e-101	0.282729	0.445	0.017	8.74328e-97	E11.5-3
Chsy1	5.19438e-39	0.282576	0.566	0.154	1.45432e-34	E11.5-3
Tor2a	3.91439e-23	0.28255	0.78	0.423	1.09595e-18	E11.5-3
Bcap31	3.41502e-14	0.282483	0.827	0.592	9.56136e-10	E11.5-3
Cox6b2	7.82958e-32	0.282293	0.555	0.18	2.19212e-27	E11.5-3
Cfdp1	4.33648e-21	0.281985	0.988	0.944	1.21413e-16	E11.5-3
Gar1	2.13988e-16	0.281844	0.728	0.479	5.99125e-12	E11.5-3
Tmem64	7.73958e-71	0.281062	0.514	0.063	2.16693e-66	E11.5-3
Rassf2	5.74148e-39	0.280958	0.566	0.156	1.6075e-34	E11.5-3
Gjc1	7.17514e-25	0.280718	0.682	0.314	2.0089e-20	E11.5-3
Spata6	2.03937e-51	0.280493	0.549	0.115	5.70983e-47	E11.5-3
Rcsd1	4.52936e-112	0.280371	0.468	0.015	1.26813e-107	E11.5-3
Vegfc	2.88556e-80	0.280224	0.509	0.05	8.07899e-76	E11.5-3
Cenpl	2.47996e-51	0.280165	0.445	0.07	6.94339e-47	E11.5-3
Fut8	2.44064e-28	0.279489	0.688	0.293	6.83332e-24	E11.5-3
Fam3c	7.18974e-30	0.278827	0.74	0.331	2.01298e-25	E11.5-3
Dtl	5.24787e-62	0.278643	0.399	0.038	1.4693e-57	E11.5-3
Ednra	5.83376e-109	0.278481	0.457	0.014	1.63334e-104	E11.5-3
Man1c1	5.75701e-93	0.278202	0.503	0.036	1.61185e-88	E11.5-3
Cep164	1.26374e-26	0.278194	0.694	0.322	3.53823e-22	E11.5-3
Cib1	2.936e-25	0.277967	0.705	0.332	8.22021e-21	E11.5-3
S100a13	2.11822e-40	0.277958	0.526	0.127	5.93058e-36	E11.5-3
Tjp1	8.28428e-47	0.277151	0.532	0.115	2.31943e-42	E11.5-3
Phldb2	3.18872e-76	0.277004	0.503	0.051	8.92778e-72	E11.5-3
3110082I17Rik	3.52736e-51	0.276892	0.514	0.098	9.87591e-47	E11.5-3
Aldh7a1	2.40765e-22	0.275999	0.59	0.261	6.74093e-18	E11.5-3
Wdr89	6.55056e-19	0.275217	0.965	0.876	1.83402e-14	E11.5-3
Gm8730	2.82739e-16	0.274796	0.913	0.798	7.91612e-12	E11.5-3
Dock6	1.54619e-87	0.274091	0.439	0.025	4.32903e-83	E11.5-3
Nelfe	3.45297e-20	0.274088	0.78	0.461	9.66764e-16	E11.5-3
Zbed3	5.39846e-17	0.273895	0.763	0.479	1.51146e-12	E11.5-3
D8Ertd738e	1.32964e-21	0.273766	0.994	0.971	3.72273e-17	E11.5-3
Fkbp7	1.46891e-63	0.273759	0.468	0.057	4.11267e-59	E11.5-3
Jak1	9.22519e-23	0.272925	0.694	0.363	2.58287e-18	E11.5-3
Melk	1.2956e-105	0.272858	0.503	0.025	3.62742e-101	E11.5-3
Il6st	9.45624e-38	0.272815	0.48	0.114	2.64756e-33	E11.5-3
Commd1	5.71351e-15	0.272537	0.942	0.804	1.59967e-10	E11.5-3
Rrm1	1.18856e-21	0.272431	0.566	0.256	3.32774e-17	E11.5-3
Psmc3ip	1.4753e-47	0.272217	0.543	0.114	4.13055e-43	E11.5-3
Rpl34	2.77529e-38	0.272003	1	1	7.77025e-34	E11.5-3
Metrn	9.404e-29	0.27196	0.642	0.238	2.63293e-24	E11.5-3
Ebpl	1.03152e-15	0.271679	0.85	0.569	2.88805e-11	E11.5-3
Slc35a4	1.79018e-20	0.271523	0.728	0.411	5.01215e-16	E11.5-3
Laptm4b	1.9672e-18	0.271446	0.543	0.248	5.50776e-14	E11.5-3
Nenf	5.24899e-15	0.271248	0.971	0.874	1.46961e-10	E11.5-3
Pttg1	8.12779e-18	0.271007	0.653	0.346	2.27562e-13	E11.5-3
9130401M01Rik	2.56469e-16	0.270441	0.711	0.48	7.18062e-12	E11.5-3
Arhgap28	9.52746e-41	0.270297	0.555	0.139	2.6675e-36	E11.5-3
Atad2	6.19231e-75	0.270269	0.428	0.032	1.73372e-70	E11.5-3
Med9	1.47953e-18	0.270169	0.757	0.473	4.1424e-14	E11.5-3
Csnk1g2	1.33167e-18	0.270158	0.832	0.571	3.72842e-14	E11.5-3
Gcsh	4.82235e-15	0.269973	0.902	0.747	1.35016e-10	E11.5-3
Ube2a	2.44725e-14	0.269899	0.908	0.74	6.8518e-10	E11.5-3
Tmem14c	9.07627e-16	0.269175	0.965	0.876	2.54117e-11	E11.5-3
Eif3i	1.21302e-20	0.26917	0.977	0.967	3.3962e-16	E11.5-3
Sumo3	9.63742e-16	0.268733	0.977	0.927	2.69828e-11	E11.5-3
H2-T22	1.1208e-59	0.268654	0.538	0.089	3.13802e-55	E11.5-3
Cxxc5	7.65263e-16	0.268476	0.861	0.544	2.14258e-11	E11.5-3
Fen1	1.46999e-26	0.268396	0.566	0.212	4.11568e-22	E11.5-3
Nucb1	1.51773e-20	0.268088	0.653	0.339	4.24935e-16	E11.5-3
Gm266	2.22166e-80	0.267991	0.376	0.017	6.22019e-76	E11.5-3
Dnajc3	2.57074e-24	0.267941	0.613	0.264	7.19756e-20	E11.5-3
Gprc5c	8.77031e-69	0.267634	0.462	0.051	2.45551e-64	E11.5-3
Nfatc4	7.20387e-101	0.267456	0.486	0.025	2.01694e-96	E11.5-3
0610037L13Rik	5.065e-22	0.267231	0.763	0.442	1.4181e-17	E11.5-3
Wbscr22	1.32268e-22	0.266948	0.728	0.376	3.70323e-18	E11.5-3
Sp5	5.29085e-82	0.266371	0.376	0.016	1.48133e-77	E11.5-3
Atp5j	5.73299e-26	0.266135	1	0.996	1.60512e-21	E11.5-3
Slc50a1	5.98515e-31	0.265912	0.601	0.212	1.67572e-26	E11.5-3
Tbc1d1	2.4162e-30	0.265677	0.549	0.178	6.76489e-26	E11.5-3
Rad21	1.84008e-15	0.265536	0.786	0.563	5.15186e-11	E11.5-3
Plscr3	4.8679e-19	0.265127	0.838	0.526	1.36292e-14	E11.5-3
Mettl9	2.74966e-19	0.265054	0.988	0.968	7.69849e-15	E11.5-3
Spr	1.87552e-23	0.264311	0.676	0.322	5.25109e-19	E11.5-3
Rpl13a	2.73023e-41	0.264122	1	1	7.64411e-37	E11.5-3
Mcfd2	2.07643e-27	0.263871	0.717	0.312	5.81358e-23	E11.5-3
Ptpn14	1.11536e-90	0.263757	0.434	0.022	3.12278e-86	E11.5-3
Lima1	4.0474e-52	0.263542	0.52	0.096	1.13319e-47	E11.5-3
Dcbld2	1.02147e-26	0.262693	0.607	0.235	2.85991e-22	E11.5-3
Josd2	6.16189e-17	0.262677	0.688	0.421	1.72521e-12	E11.5-3
H1fx	1.01489e-09	0.26257	0.925	0.869	2.84148e-05	E11.5-3
Nsmce1	6.64159e-17	0.262466	0.861	0.586	1.85951e-12	E11.5-3
Ckap4	1.45421e-14	0.262424	0.96	0.9	4.0715e-10	E11.5-3
Rpl7l1	1.75182e-17	0.262074	0.855	0.593	4.90475e-13	E11.5-3
Thbs1	1.97699e-53	0.261974	0.272	0.015	5.53519e-49	E11.5-3
Prkrir	5.85273e-23	0.261878	0.705	0.358	1.63865e-18	E11.5-3
Sgol2a	8.36595e-85	0.260714	0.399	0.019	2.3423e-80	E11.5-3
Fdx1	1.54142e-22	0.260399	0.717	0.358	4.31566e-18	E11.5-3
Pvrl2	5.74961e-13	0.259341	0.665	0.438	1.60978e-08	E11.5-3
Tomm7	1.65356e-14	0.259323	0.977	0.923	4.62962e-10	E11.5-3
Bet1	1.77564e-22	0.25905	0.751	0.409	4.97143e-18	E11.5-3
Gm8186	4.10754e-16	0.258684	0.803	0.543	1.15003e-11	E11.5-3
Rpl35	1.83875e-33	0.258351	1	1	5.14813e-29	E11.5-3
Prdm5	3.0917e-74	0.258311	0.439	0.036	8.65615e-70	E11.5-3
Oxct1	2.69105e-12	0.257827	0.919	0.778	7.53441e-08	E11.5-3
Flnb	1.0294e-40	0.257613	0.486	0.107	2.88211e-36	E11.5-3
Tmod3	1.19096e-22	0.257525	0.74	0.368	3.33445e-18	E11.5-3
Wscd2	5.5106e-30	0.257148	0.566	0.181	1.54286e-25	E11.5-3
Anxa7	1.33767e-38	0.256758	0.572	0.163	3.74521e-34	E11.5-3
Kif2c	2.6414e-81	0.256578	0.376	0.017	7.39539e-77	E11.5-3
Tmem107	1.0569e-47	0.256388	0.52	0.105	2.95911e-43	E11.5-3
Tra2b	1.21381e-16	0.256231	0.971	0.918	3.39842e-12	E11.5-3
1110008F13Rik	1.7045e-19	0.256062	0.977	0.927	4.77226e-15	E11.5-3
Spg20	2.35129e-47	0.256043	0.578	0.131	6.58314e-43	E11.5-3
Ptges3	2.8331e-17	0.256	0.977	0.903	7.93212e-13	E11.5-3
Prex2	6.86237e-121	0.255996	0.48	0.012	1.92133e-116	E11.5-3
Gxylt2	1.45589e-104	0.255897	0.439	0.014	4.0762e-100	E11.5-3
Cyp1b1	1.52235e-88	0.25565	0.416	0.02	4.26229e-84	E11.5-3
Chchd3	2.78448e-17	0.255557	0.931	0.709	7.79599e-13	E11.5-3
Mrc2	2.44186e-88	0.25555	0.382	0.014	6.83673e-84	E11.5-3
Alad	2.36365e-17	0.255371	0.717	0.414	6.61776e-13	E11.5-3
Tomm5	1.82551e-15	0.255331	0.977	0.872	5.11107e-11	E11.5-3
Tgfbr2	2.376e-109	0.254965	0.451	0.013	6.65231e-105	E11.5-3
Wfdc2	1.07049e-70	0.25493	0.358	0.02	2.99717e-66	E11.5-3
Cuta	3.78095e-16	0.254865	0.954	0.795	1.05859e-11	E11.5-3
Pdcd5	4.29236e-18	0.254407	0.988	0.963	1.20178e-13	E11.5-3
Mogat2	7.82048e-62	0.25423	0.434	0.048	2.18958e-57	E11.5-3
Slc6a20a	1.47483e-94	0.254171	0.393	0.012	4.12923e-90	E11.5-3
Tbl1x	6.5504e-16	0.254081	0.746	0.463	1.83398e-11	E11.5-3
Rps6	9.58694e-37	0.253232	1	1	2.68415e-32	E11.5-3
1600012H06Rik	3.7848e-23	0.25235	0.642	0.282	1.05967e-18	E11.5-3
Itga5	1.25956e-110	0.252173	0.422	0.008	3.52652e-106	E11.5-3
Cdc25c	2.19407e-70	0.251942	0.37	0.023	6.14297e-66	E11.5-3
Cfap20	5.50014e-19	0.251753	0.89	0.653	1.53993e-14	E11.5-3
Sema5a	1.89667e-38	0.251745	0.462	0.103	5.3103e-34	E11.5-3
Gsta4	2.46259e-83	0.25126	0.393	0.018	6.89475e-79	E11.5-3
B3gnt9	2.64239e-68	0.250889	0.462	0.05	7.39818e-64	E11.5-3
Pole3	5.7321e-20	0.250822	0.821	0.499	1.60487e-15	E11.5-3
C1ql1	3.90312e-155	1.48422	0.967	0.091	1.0928e-150	E11.5-4
Fgf13	3.46491e-71	1.46184	0.975	0.459	9.70105e-67	E11.5-4
Nkx6-1	2.46103e-180	1.41998	0.959	0.068	6.8904e-176	E11.5-4
Sncg	4.40083e-51	1.39073	0.984	0.451	1.23214e-46	E11.5-4
Nefl	1.14037e-58	1.33135	1	0.849	3.19281e-54	E11.5-4
Phox2b	4.47659e-165	1.27926	0.975	0.076	1.25336e-160	E11.5-4
Nefm	9.81222e-53	1.26405	0.992	0.807	2.74723e-48	E11.5-4
Eya1	1.96966e-102	1.18906	0.902	0.163	5.51464e-98	E11.5-4
Pou6f2	3.05952e-78	1.15134	0.959	0.276	8.56604e-74	E11.5-4
Tppp3	5.75077e-53	1.07209	0.992	0.762	1.6101e-48	E11.5-4
Alcam	5.41188e-80	1.0475	0.975	0.271	1.51522e-75	E11.5-4
Irx5	3.83734e-105	1.03214	0.967	0.177	1.07438e-100	E11.5-4
Phox2a	6.24319e-211	1.00096	0.943	0.036	1.74797e-206	E11.5-4
Rprm	9.85038e-48	0.989409	1	0.571	2.75791e-43	E11.5-4
Ebf1	6.74909e-46	0.986484	1	0.597	1.88961e-41	E11.5-4
Sema3d	1.15132e-208	0.983251	0.926	0.037	3.22346e-204	E11.5-4
Nrp2	1.06559e-102	0.974404	0.967	0.19	2.98345e-98	E11.5-4
Id2	2.05682e-50	0.9418	0.967	0.427	5.75869e-46	E11.5-4
Irx3	8.95638e-82	0.93877	0.885	0.182	2.50761e-77	E11.5-4
Snhg11	5.96175e-31	0.903774	0.992	0.781	1.66917e-26	E11.5-4
Gap43	3.37326e-54	0.894265	1	0.975	9.44445e-50	E11.5-4
Lhx4	5.02958e-233	0.853564	0.885	0.017	1.40818e-228	E11.5-4
Ecel1	2.24124e-133	0.84667	0.926	0.096	6.27501e-129	E11.5-4
Rbms3	5.07456e-61	0.825113	0.918	0.293	1.42078e-56	E11.5-4
Rbp1	1.21362e-39	0.822063	0.992	0.642	3.3979e-35	E11.5-4
Crnde	7.21253e-114	0.808879	0.902	0.121	2.01937e-109	E11.5-4
Irx6	8.68679e-123	0.806653	0.803	0.072	2.43213e-118	E11.5-4
Prph	4.40874e-52	0.805195	0.754	0.175	1.23436e-47	E11.5-4
Cox5a	9.39347e-58	0.797131	1	0.995	2.62998e-53	E11.5-4
Asap1	2.53821e-55	0.768079	0.975	0.514	7.10648e-51	E11.5-4
Tln2	8.14388e-101	0.762132	0.869	0.137	2.28012e-96	E11.5-4
Ntng1	3.34558e-57	0.747277	0.902	0.272	9.36695e-53	E11.5-4
Cyb561	7.66592e-75	0.737759	0.926	0.24	2.1463e-70	E11.5-4
Slc10a4	1.34586e-95	0.714845	0.852	0.134	3.76813e-91	E11.5-4
Rxrg	8.79924e-199	0.699223	0.803	0.02	2.46361e-194	E11.5-4
Nr2f2	2.78678e-39	0.694253	0.951	0.539	7.80243e-35	E11.5-4
Pcdh9	4.18876e-42	0.692129	0.828	0.267	1.17277e-37	E11.5-4
Resp18	1.14823e-42	0.687077	0.975	0.504	3.21481e-38	E11.5-4
Isl1	1.43126e-32	0.683962	0.992	0.633	4.00723e-28	E11.5-4
En1	3.61719e-121	0.680575	0.836	0.076	1.01274e-116	E11.5-4
Snap25	1.48121e-39	0.679733	0.992	0.794	4.14708e-35	E11.5-4
Uchl1	1.68184e-37	0.669307	1	0.952	4.70881e-33	E11.5-4
Mapre2	6.82995e-41	0.636582	1	0.865	1.91225e-36	E11.5-4
Elavl4	2.31398e-42	0.636104	1	0.894	6.47868e-38	E11.5-4
Stmn4	1.24004e-30	0.632516	1	0.794	3.47186e-26	E11.5-4
Pcbp3	1.93529e-49	0.631097	0.975	0.48	5.41843e-45	E11.5-4
S100a10	1.09686e-28	0.627067	1	0.794	3.071e-24	E11.5-4
Clvs1	7.13965e-64	0.624389	0.959	0.318	1.99896e-59	E11.5-4
Ncam1	6.1498e-33	0.610203	1	0.946	1.72182e-28	E11.5-4
Nrg1	1.56347e-48	0.607225	0.926	0.349	4.3774e-44	E11.5-4
Casz1	1.22528e-101	0.599378	0.795	0.092	3.43055e-97	E11.5-4
Fxyd7	1.57024e-66	0.594256	0.68	0.104	4.39637e-62	E11.5-4
Rabac1	7.16535e-42	0.589805	1	0.906	2.00615e-37	E11.5-4
Acot7	5.73117e-31	0.579879	0.992	0.853	1.60461e-26	E11.5-4
Nxph4	8.80077e-97	0.576066	0.82	0.099	2.46404e-92	E11.5-4
Slc18a3	1.98091e-182	0.574405	0.689	0.012	5.54615e-178	E11.5-4
Stmn3	1.15848e-46	0.572791	1	0.931	3.2435e-42	E11.5-4
Lypd1	3.34243e-53	0.57108	0.484	0.061	9.35813e-49	E11.5-4
Slit2	1.21212e-46	0.551206	0.91	0.322	3.39369e-42	E11.5-4
Mxra7	3.78741e-55	0.55108	0.885	0.286	1.0604e-50	E11.5-4
Map1lc3a	1.38341e-38	0.53914	0.992	0.975	3.87327e-34	E11.5-4
Rab6b	5.22744e-36	0.529953	0.992	0.789	1.46358e-31	E11.5-4
Id4	1.26711e-45	0.524038	0.852	0.254	3.54766e-41	E11.5-4
Gdnf	2.20153e-171	0.515584	0.803	0.033	6.16385e-167	E11.5-4
Snx18	5.36612e-35	0.506739	0.844	0.363	1.50241e-30	E11.5-4
Qk	1.91984e-39	0.485867	0.926	0.39	5.37517e-35	E11.5-4
Olfm1	1.57359e-27	0.485371	0.992	0.704	4.40573e-23	E11.5-4
Ina	1.00728e-23	0.476823	1	0.924	2.82019e-19	E11.5-4
Scg2	2.87031e-31	0.475688	0.426	0.086	8.0363e-27	E11.5-4
Gal	2.21602e-104	0.47119	0.615	0.039	6.20441e-100	E11.5-4
Tspan17	1.65586e-24	0.465565	1	0.685	4.63607e-20	E11.5-4
Pacrg	3.89504e-124	0.455058	0.713	0.047	1.09053e-119	E11.5-4
Mllt11	4.20869e-36	0.452805	1	0.955	1.17835e-31	E11.5-4
Stxbp6	3.65286e-67	0.450698	0.689	0.111	1.02273e-62	E11.5-4
Plxna2	7.38909e-58	0.448818	0.697	0.128	2.0688e-53	E11.5-4
Tenm3	6.36941e-47	0.44807	0.852	0.27	1.78331e-42	E11.5-4
Syt7	1.26101e-48	0.445389	0.926	0.281	3.53058e-44	E11.5-4
Basp1	8.43417e-33	0.445233	1	0.999	2.3614e-28	E11.5-4
Smim18	1.17213e-38	0.443173	0.926	0.376	3.28174e-34	E11.5-4
Cplx1	2.64301e-36	0.441622	0.877	0.372	7.3999e-32	E11.5-4
Plcb1	1.75068e-51	0.440231	0.68	0.137	4.90156e-47	E11.5-4
Stmn2	1.78089e-39	0.43761	1	0.942	4.98613e-35	E11.5-4
Sepw1	6.3256e-39	0.435253	1	1	1.77104e-34	E11.5-4
Ppp2r2b	0.000742622	0.428585	0.475	0.346	1	E11.5-4
Meg3	2.90899e-12	0.427114	0.975	0.96	8.1446e-08	E11.5-4
Mapt	1.79897e-19	0.425287	0.992	0.883	5.03675e-15	E11.5-4
Laptm4b	7.20786e-41	0.424184	0.77	0.239	2.01806e-36	E11.5-4
Hcfc1r1	1.72728e-25	0.419202	0.992	0.836	4.83605e-21	E11.5-4
Cnst	1.02818e-34	0.414989	0.787	0.291	2.87869e-30	E11.5-4
Cend1	5.06358e-27	0.413449	0.975	0.679	1.4177e-22	E11.5-4
Serf1	3.03957e-26	0.412682	1	0.983	8.51018e-22	E11.5-4
Ndufv3	8.18654e-31	0.409666	1	0.967	2.29207e-26	E11.5-4
Atp5o	3.81952e-28	0.409396	1	0.99	1.06939e-23	E11.5-4
Cox7b	5.41379e-32	0.409329	1	0.987	1.51575e-27	E11.5-4
Nyap2	1.81287e-103	0.408731	0.697	0.059	5.07568e-99	E11.5-4
Fjx1	4.08786e-24	0.400321	0.836	0.429	1.14452e-19	E11.5-4
Higd1a	1.27583e-24	0.395073	1	0.945	3.57208e-20	E11.5-4
Scn3a	8.29833e-28	0.394222	0.91	0.471	2.32337e-23	E11.5-4
Mgst3	1.83489e-20	0.393319	1	0.863	5.13731e-16	E11.5-4
Esrrg	9.95645e-78	0.393083	0.574	0.055	2.78761e-73	E11.5-4
Cdh13	2.28037e-52	0.392539	0.648	0.124	6.38458e-48	E11.5-4
March4	1.77509e-131	0.391377	0.787	0.054	4.9699e-127	E11.5-4
Arhgap22	2.18112e-64	0.391214	0.557	0.069	6.10669e-60	E11.5-4
Atp6v0b	6.06484e-23	0.382422	1	0.927	1.69803e-18	E11.5-4
Vstm2l	6.19865e-34	0.38219	0.762	0.235	1.7355e-29	E11.5-4
Ywhaq	3.55222e-30	0.380488	1	1	9.94551e-26	E11.5-4
Ddah1	6.32829e-30	0.378531	0.811	0.328	1.7718e-25	E11.5-4
Plekha5	5.36076e-25	0.37806	0.787	0.371	1.5009e-20	E11.5-4
Ndufb8	2.5947e-27	0.37544	1	0.98	7.26465e-23	E11.5-4
Atp5g3	4.62993e-28	0.37369	1	0.995	1.29629e-23	E11.5-4
Atp2b1	5.06294e-19	0.372044	0.975	0.8	1.41752e-14	E11.5-4
Scn3b	1.06576e-25	0.372017	0.926	0.459	2.98392e-21	E11.5-4
Eya2	3.54649e-87	0.371847	0.689	0.073	9.92946e-83	E11.5-4
Dab1	2.01468e-30	0.37084	0.713	0.244	5.6407e-26	E11.5-4
Ubash3b	3.96935e-27	0.37048	0.91	0.407	1.11134e-22	E11.5-4
Cox6b1	1.46073e-33	0.369335	1	1	4.08974e-29	E11.5-4
Ttc9b	3.87378e-22	0.368804	0.984	0.656	1.08458e-17	E11.5-4
Tes	6.91057e-30	0.367931	0.852	0.372	1.93482e-25	E11.5-4
Cd47	9.09295e-20	0.362749	0.943	0.707	2.54584e-15	E11.5-4
Khdrbs3	1.69211e-25	0.362656	0.893	0.459	4.73756e-21	E11.5-4
Gm2990	3.92909e-146	0.360792	0.582	0.012	1.10007e-141	E11.5-4
Serpini1	1.02829e-26	0.359789	0.943	0.464	2.87899e-22	E11.5-4
Elavl2	4.19248e-20	0.35777	0.975	0.714	1.17381e-15	E11.5-4
Cox7a2	2.96327e-29	0.355586	1	0.998	8.29655e-25	E11.5-4
Met	2.2543e-106	0.35556	0.451	0.012	6.31159e-102	E11.5-4
Mif	3.10185e-20	0.355192	1	0.999	8.68456e-16	E11.5-4
Cox6a1	8.62856e-31	0.355025	1	0.999	2.41582e-26	E11.5-4
Eml1	4.14007e-40	0.354609	0.779	0.222	1.15914e-35	E11.5-4
Gng2	1.31374e-20	0.352921	1	0.955	3.67821e-16	E11.5-4
Mpc1	3.42267e-23	0.352436	0.992	0.773	9.58278e-19	E11.5-4
Nrep	1.0213e-17	0.352107	0.992	0.809	2.85944e-13	E11.5-4
Ndrg2	1.62225e-30	0.349197	0.738	0.26	4.54196e-26	E11.5-4
Cox4i1	2.14482e-32	0.349081	1	1	6.00506e-28	E11.5-4
Sms	5.0851e-14	0.347157	1	0.953	1.42373e-09	E11.5-4
Tagln3	3.74851e-17	0.346068	1	0.919	1.04951e-12	E11.5-4
Ctxn1	1.47362e-19	0.34114	1	0.922	4.12584e-15	E11.5-4
Cdk15	5.16398e-91	0.340561	0.443	0.018	1.44581e-86	E11.5-4
Cox7c	4.52374e-33	0.337865	1	0.999	1.26656e-28	E11.5-4
Ehbp1	6.78017e-08	0.334996	0.492	0.273	0.00189831	E11.5-4
Tmem169	1.36943e-25	0.334126	0.877	0.405	3.83412e-21	E11.5-4
Lyrm9	1.39945e-23	0.33407	0.803	0.365	3.91818e-19	E11.5-4
Lmo1	6.02821e-39	0.333161	0.787	0.229	1.68778e-34	E11.5-4
Rab3a	2.29098e-14	0.325797	0.992	0.866	6.41429e-10	E11.5-4
Tecr	2.42381e-13	0.325493	1	0.994	6.78618e-09	E11.5-4
Cacng2	1.88608e-29	0.325031	0.836	0.315	5.28065e-25	E11.5-4
Susd4	6.8333e-25	0.32417	0.803	0.346	1.91319e-20	E11.5-4
Arl8a	3.51212e-17	0.323736	0.992	0.852	9.83323e-13	E11.5-4
Dach2	6.96551e-48	0.323152	0.721	0.161	1.9502e-43	E11.5-4
Tenm2	1.40769e-28	0.320021	0.779	0.291	3.94126e-24	E11.5-4
Clstn2	3.06032e-31	0.318022	0.779	0.265	8.56829e-27	E11.5-4
Rtn1	3.4697e-17	0.31792	1	1	9.71447e-13	E11.5-4
Epha7	4.70987e-26	0.316003	0.754	0.267	1.31867e-21	E11.5-4
Nudt17	4.00225e-34	0.315965	0.705	0.21	1.12055e-29	E11.5-4
Lrfn5	1.82497e-31	0.312097	0.689	0.205	5.10954e-27	E11.5-4
Scoc	6.36353e-18	0.312048	0.992	0.743	1.78166e-13	E11.5-4
Cst3	5.26711e-19	0.311773	0.992	0.93	1.47468e-14	E11.5-4
Fam171b	1.61685e-16	0.309935	0.984	0.755	4.52685e-12	E11.5-4
6330403K07Rik	2.56337e-13	0.309732	1	0.98	7.17691e-09	E11.5-4
Rhob	2.97516e-16	0.309726	0.943	0.707	8.32986e-12	E11.5-4
Snrpn	5.41205e-15	0.309611	1	0.946	1.51527e-10	E11.5-4
Fdps	1.26942e-07	0.309128	0.992	0.948	0.00355413	E11.5-4
Vamp2	5.30878e-16	0.308251	1	0.871	1.48635e-11	E11.5-4
Cisd1	4.68635e-16	0.308234	0.984	0.832	1.31208e-11	E11.5-4
Zmiz1	7.72318e-15	0.307263	0.975	0.73	2.16234e-10	E11.5-4
Ncoa7	9.12509e-35	0.306682	0.779	0.257	2.55484e-30	E11.5-4
Tmeff2	5.01684e-09	0.306521	0.861	0.693	0.000140462	E11.5-4
Ndrg4	9.39594e-20	0.306096	0.975	0.59	2.63067e-15	E11.5-4
Psenen	7.18668e-20	0.304996	0.992	0.919	2.01213e-15	E11.5-4
Nicn1	1.62731e-15	0.302569	0.934	0.607	4.55614e-11	E11.5-4
Atp5d	7.64243e-22	0.302396	1	0.985	2.13973e-17	E11.5-4
Dad1	6.49349e-18	0.302223	1	0.935	1.81805e-13	E11.5-4
Ddt	5.37272e-18	0.302044	0.951	0.714	1.50425e-13	E11.5-4
Cib2	3.59366e-17	0.301679	0.852	0.475	1.00615e-12	E11.5-4
1110008P14Rik	4.17736e-16	0.299411	0.992	0.853	1.16958e-11	E11.5-4
Csrp2	1.45587e-17	0.296567	0.984	0.802	4.07615e-13	E11.5-4
Dnajc12	2.05133e-32	0.29539	0.746	0.238	5.74331e-28	E11.5-4
Rundc3a	2.43274e-15	0.293881	1	0.823	6.81119e-11	E11.5-4
Rgs7	8.48037e-38	0.291987	0.697	0.188	2.37433e-33	E11.5-4
2900011O08Rik	8.83691e-16	0.290406	0.959	0.594	2.47416e-11	E11.5-4
Tanc2	1.17057e-20	0.288235	0.82	0.378	3.27736e-16	E11.5-4
Pbx3	3.03101e-18	0.288052	0.836	0.419	8.48622e-14	E11.5-4
Atp5h	4.76288e-24	0.287862	1	1	1.33351e-19	E11.5-4
Cxcr4	7.79664e-50	0.287842	0.516	0.073	2.1829e-45	E11.5-4
Cystm1	7.39977e-18	0.287292	0.844	0.462	2.07179e-13	E11.5-4
Map6	3.79413e-13	0.286538	0.975	0.732	1.06228e-08	E11.5-4
RP23-291B1.2	3.14563e-40	0.286484	0.615	0.137	8.80713e-36	E11.5-4
Dynlrb1	7.3727e-22	0.286204	1	0.997	2.06421e-17	E11.5-4
Atp6v1e1	2.54111e-14	0.285916	0.992	0.903	7.11459e-10	E11.5-4
Slit3	5.3795e-75	0.284308	0.566	0.055	1.50615e-70	E11.5-4
Ndufa4	5.74016e-21	0.283567	1	0.999	1.60713e-16	E11.5-4
Kif5c	3.04602e-13	0.282358	0.992	0.887	8.52824e-09	E11.5-4
Atp6v1g2	1.56785e-19	0.282171	0.689	0.301	4.38966e-15	E11.5-4
Arhgdig	1.02743e-13	0.281966	0.893	0.568	2.87661e-09	E11.5-4
Ache	3.28373e-49	0.281621	0.582	0.099	9.1938e-45	E11.5-4
Ckb	1.73346e-10	0.280043	1	0.967	4.85334e-06	E11.5-4
Bsg	3.71828e-19	0.279105	0.992	0.989	1.04105e-14	E11.5-4
Cisd3	9.2647e-19	0.278722	0.713	0.339	2.59393e-14	E11.5-4
Gm1673	7.46868e-17	0.277712	1	0.996	2.09108e-12	E11.5-4
Fam57b	1.67393e-12	0.276578	1	0.73	4.68668e-08	E11.5-4
Unc5c	6.42864e-24	0.276507	0.795	0.324	1.79989e-19	E11.5-4
Vldlr	1.10617e-34	0.276059	0.639	0.165	3.09705e-30	E11.5-4
Ndufs5	1.73205e-17	0.275543	1	0.982	4.8494e-13	E11.5-4
Sar1b	2.08807e-13	0.275082	0.959	0.769	5.84618e-09	E11.5-4
Ndufb6	4.3791e-16	0.274617	1	0.896	1.22606e-11	E11.5-4
Akap6	4.85634e-16	0.273852	0.869	0.48	1.35968e-11	E11.5-4
Kif1b	4.73256e-12	0.272806	1	0.914	1.32502e-07	E11.5-4
Elmo1	9.98961e-23	0.272414	0.844	0.342	2.79689e-18	E11.5-4
D930028M14Rik	1.48747e-12	0.272148	1	0.666	4.16462e-08	E11.5-4
Thsd7a	2.76352e-21	0.272114	0.893	0.434	7.73731e-17	E11.5-4
Cntn5	1.77322e-34	0.27056	0.631	0.151	4.96465e-30	E11.5-4
Pfdn4	4.40774e-15	0.270453	1	0.925	1.23408e-10	E11.5-4
Kcnab1	8.7287e-46	0.270417	0.467	0.066	2.44386e-41	E11.5-4
1700037H04Rik	2.84687e-13	0.268451	0.934	0.723	7.97068e-09	E11.5-4
Dcx	7.57136e-12	0.268242	1	0.854	2.11983e-07	E11.5-4
Pmm1	3.85143e-14	0.268082	0.91	0.632	1.07832e-09	E11.5-4
Cotl1	1.38957e-14	0.267845	1	0.961	3.89052e-10	E11.5-4
Dctn3	4.10096e-15	0.266745	0.992	0.939	1.14819e-10	E11.5-4
Pgam1	3.25205e-11	0.265377	1	0.961	9.10508e-07	E11.5-4
Cd200	1.82267e-12	0.265179	0.943	0.65	5.10311e-08	E11.5-4
Adgrb3	3.93998e-20	0.264967	0.787	0.33	1.10312e-15	E11.5-4
Lifr	1.07858e-32	0.264844	0.582	0.148	3.01981e-28	E11.5-4
Tonsl	1.79202e-14	0.264836	0.992	0.902	5.01731e-10	E11.5-4
Reep1	2.38834e-11	0.264138	0.984	0.798	6.68687e-07	E11.5-4
Scg3	9.86915e-10	0.263585	0.951	0.753	2.76316e-05	E11.5-4
Cd81	2.35438e-13	0.263299	1	0.874	6.5918e-09	E11.5-4
Lingo1	1.96583e-17	0.263198	0.836	0.416	5.50394e-13	E11.5-4
Pgm2l1	7.89171e-12	0.262806	0.877	0.564	2.20952e-07	E11.5-4
Cacng4	1.08967e-15	0.262432	0.861	0.472	3.05085e-11	E11.5-4
Tsc22d3	4.50659e-14	0.262175	0.984	0.792	1.26175e-09	E11.5-4
Bcam	7.62242e-42	0.262078	0.533	0.1	2.13413e-37	E11.5-4
Atp5f1	1.45998e-13	0.261025	1	0.999	4.08765e-09	E11.5-4
Npc2	4.03682e-16	0.259972	1	0.971	1.13023e-11	E11.5-4
Parvb	1.34549e-17	0.259035	0.943	0.512	3.7671e-13	E11.5-4
C1d	8.83885e-14	0.259035	1	0.932	2.4747e-09	E11.5-4
Serinc1	1.65271e-11	0.258212	0.975	0.911	4.62726e-07	E11.5-4
A730017C20Rik	2.16235e-13	0.258002	0.967	0.639	6.05414e-09	E11.5-4
Ndn	4.33437e-09	0.257415	0.975	0.77	0.000121354	E11.5-4
Syngr3	7.61246e-16	0.256906	0.795	0.429	2.13134e-11	E11.5-4
Nsg2	6.20919e-11	0.256823	0.992	0.783	1.73845e-06	E11.5-4
Negr1	5.34316e-30	0.256558	0.656	0.187	1.49598e-25	E11.5-4
Arl6ip5	6.22985e-13	0.254009	0.984	0.886	1.74423e-08	E11.5-4
Atp5l	1.79091e-20	0.253891	1	0.997	5.01419e-16	E11.5-4
Cfl2	7.95185e-17	0.253528	1	0.986	2.22636e-12	E11.5-4
Lrrc58	4.61849e-12	0.253299	0.926	0.685	1.29308e-07	E11.5-4
Fam102b	3.39095e-29	0.252841	0.697	0.216	9.49398e-25	E11.5-4
Kif5a	8.41106e-13	0.252388	0.951	0.64	2.35493e-08	E11.5-4
Tpi1	2.40747e-10	0.252265	1	0.969	6.74043e-06	E11.5-4
Pmfbp1	1.18401e-56	0.252202	0.549	0.07	3.31499e-52	E11.5-4
Nsg1	7.97995e-12	0.252146	1	0.967	2.23423e-07	E11.5-4
Cux2	3.13174e-21	0.251815	0.582	0.192	8.76826e-17	E11.5-4
Cadm3	2.52511e-16	0.251763	0.926	0.529	7.06981e-12	E11.5-4
Ifngr2	4.16953e-14	0.251321	0.869	0.551	1.16738e-09	E11.5-4
Crip2	2.20967e-10	0.251005	1	0.85	6.18664e-06	E11.5-4
Mdh1	1.31153e-07	0.25058	0.975	0.911	0.00367202	E11.5-4
Tmem208	1.32797e-11	0.250437	0.918	0.793	3.71806e-07	E11.5-4
Tcf7l2	1.096e-53	1.90991	0.906	0.453	3.06858e-49	E11.5-5
Pou4f1	7.94024e-80	1.68837	0.786	0.143	2.22311e-75	E11.5-5
Lhx9	3.21864e-106	1.28341	0.821	0.091	9.01156e-102	E11.5-5
Necab2	2.57398e-32	1.23172	0.735	0.316	7.20663e-28	E11.5-5
Sncg	1.53651e-31	1.21612	0.863	0.463	4.30193e-27	E11.5-5
Nwd2	9.40224e-84	1.13778	0.701	0.096	2.63244e-79	E11.5-5
Crabp1	1.13327e-16	1.01499	0.863	0.661	3.17293e-12	E11.5-5
Lef1	2.12469e-52	0.853761	0.855	0.29	5.94872e-48	E11.5-5
Bhlhe23	1.94814e-53	0.842483	0.47	0.059	5.4544e-49	E11.5-5
Lmo3	3.78001e-63	0.841066	0.821	0.18	1.05833e-58	E11.5-5
Nrn1	5.82831e-57	0.794943	0.821	0.185	1.63181e-52	E11.5-5
St6galnac5	7.88519e-39	0.770145	0.581	0.137	2.2077e-34	E11.5-5
Irx2	1.63517e-50	0.763382	0.821	0.22	4.57814e-46	E11.5-5
Shox2	9.79633e-35	0.747031	0.641	0.185	2.74278e-30	E11.5-5
Zic1	1.84575e-33	0.727697	0.778	0.25	5.16772e-29	E11.5-5
Lhx2	4.99927e-22	0.717109	0.684	0.319	1.3997e-17	E11.5-5
Gng8	7.88687e-70	0.710695	0.59	0.075	2.20817e-65	E11.5-5
Onecut2	2.39716e-18	0.68793	0.88	0.665	6.71157e-14	E11.5-5
Map7d2	7.57933e-29	0.679106	0.778	0.407	2.12206e-24	E11.5-5
Lmo1	2.93083e-26	0.673335	0.658	0.242	8.20574e-22	E11.5-5
Ube2e3	2.06701e-29	0.670561	1	0.987	5.78721e-25	E11.5-5
Cnih2	2.98564e-23	0.66091	0.923	0.863	8.35918e-19	E11.5-5
Chst2	1.38954e-24	0.656041	0.709	0.337	3.89044e-20	E11.5-5
Pou3f4	1.56352e-53	0.637307	0.778	0.193	4.37753e-49	E11.5-5
Olfm1	2.38712e-23	0.608231	0.915	0.712	6.68347e-19	E11.5-5
Ucp2	9.31175e-18	0.583836	0.829	0.573	2.60711e-13	E11.5-5
Ckb	4.51817e-25	0.582259	0.983	0.968	1.265e-20	E11.5-5
Ebf1	2.12749e-17	0.581617	0.932	0.604	5.95653e-13	E11.5-5
Mmd2	5.17986e-29	0.572138	0.812	0.369	1.45026e-24	E11.5-5
Ebf2	3.79881e-38	0.561436	0.803	0.26	1.06359e-33	E11.5-5
Lrrn1	9.18546e-28	0.550061	0.744	0.339	2.57174e-23	E11.5-5
Celf4	4.30697e-09	0.548622	0.838	0.762	0.000120587	E11.5-5
Gap43	4.25219e-16	0.546566	0.957	0.979	1.19053e-11	E11.5-5
Crip2	5.20994e-20	0.538637	0.94	0.856	1.45868e-15	E11.5-5
Syt6	3.1829e-86	0.520129	0.47	0.025	8.91147e-82	E11.5-5
Ebf3	5.38164e-29	0.51803	0.803	0.327	1.50675e-24	E11.5-5
Cplx2	4.70691e-24	0.513612	0.65	0.285	1.31784e-19	E11.5-5
Strbp	8.15188e-17	0.500448	0.923	0.788	2.28236e-12	E11.5-5
Irx1	3.07207e-40	0.491259	0.675	0.172	8.60119e-36	E11.5-5
Lin28a	1.86773e-43	0.487897	0.701	0.193	5.22926e-39	E11.5-5
Klf7	5.08709e-14	0.483276	0.889	0.888	1.42428e-09	E11.5-5
Homer2	5.00139e-21	0.47976	0.752	0.395	1.40029e-16	E11.5-5
Tac1	1.03276e-26	0.470966	0.291	0.045	2.89153e-22	E11.5-5
Otx2	1.08164e-95	0.46967	0.53	0.03	3.02838e-91	E11.5-5
Rogdi	7.99757e-19	0.465894	0.778	0.497	2.23916e-14	E11.5-5
Igdcc3	1.60571e-23	0.461105	0.803	0.403	4.49568e-19	E11.5-5
Islr2	3.0056e-13	0.45978	0.855	0.765	8.41509e-09	E11.5-5
Ddah2	1.42368e-21	0.453609	1	0.98	3.98601e-17	E11.5-5
Cntfr	2.58297e-19	0.45123	0.829	0.544	7.23179e-15	E11.5-5
Tppp3	1.92896e-12	0.450295	0.889	0.772	5.40069e-08	E11.5-5
Vat1	9.38197e-19	0.448763	0.932	0.867	2.62676e-14	E11.5-5
Barhl2	7.63781e-35	0.443248	0.197	0.011	2.13843e-30	E11.5-5
Cacnb3	1.53563e-13	0.442618	0.915	0.806	4.29947e-09	E11.5-5
Tubb2a	2.48663e-07	0.441782	0.94	0.944	0.00696208	E11.5-5
Tmem163	5.54412e-19	0.439999	0.803	0.441	1.55224e-14	E11.5-5
Pkig	3.67505e-21	0.438499	0.932	0.673	1.02894e-16	E11.5-5
Cxxc5	2.07986e-18	0.429598	0.88	0.555	5.8232e-14	E11.5-5
Nr4a2	5.80674e-19	0.420728	0.513	0.175	1.62577e-14	E11.5-5
Tspan13	3.11857e-12	0.419089	0.983	0.928	8.73137e-08	E11.5-5
Robo1	5.60244e-22	0.41433	0.778	0.43	1.56857e-17	E11.5-5
Dok5	1.64535e-15	0.410312	0.607	0.319	4.60664e-11	E11.5-5
Gpm6b	3.16507e-14	0.409057	0.863	0.708	8.86156e-10	E11.5-5
Mab21l2	1.84213e-26	0.406418	0.812	0.308	5.15759e-22	E11.5-5
Pcsk2	1.85351e-30	0.404821	0.641	0.2	5.18947e-26	E11.5-5
Rgma	8.06815e-28	0.401182	0.726	0.285	2.25892e-23	E11.5-5
Crabp2	7.18806e-14	0.398437	0.932	0.787	2.01251e-09	E11.5-5
Cttnbp2	6.4003e-13	0.395875	0.667	0.389	1.79196e-08	E11.5-5
Onecut3	1.2492e-26	0.393148	0.624	0.211	3.4975e-22	E11.5-5
Tesc	3.89372e-69	0.389683	0.436	0.032	1.09016e-64	E11.5-5
Cbln2	7.93147e-13	0.389568	0.41	0.161	2.22065e-08	E11.5-5
Tubb3	8.35641e-16	0.389307	0.983	0.968	2.33963e-11	E11.5-5
Vav3	7.00903e-22	0.382493	0.59	0.229	1.96239e-17	E11.5-5
Itm2b	3.51244e-17	0.381414	0.983	0.844	9.83412e-13	E11.5-5
Msi2	1.21648e-17	0.3801	0.821	0.542	3.4059e-13	E11.5-5
Gpm6a	2.80143e-11	0.371815	0.829	0.655	7.84344e-07	E11.5-5
Nhlh2	5.33891e-08	0.368288	0.855	0.83	0.00149479	E11.5-5
Hmgn2	1.22218e-06	0.367548	0.966	0.812	0.0342186	E11.5-5
Cacng4	2.0352e-15	0.36554	0.786	0.479	5.69816e-11	E11.5-5
Ccdc34	5.4233e-11	0.359852	0.906	0.657	1.51841e-06	E11.5-5
Gareml	1.05763e-35	0.359636	0.573	0.137	2.96116e-31	E11.5-5
Arl6	4.90507e-19	0.356448	0.735	0.429	1.37332e-14	E11.5-5
Pantr1	7.4532e-13	0.354955	0.632	0.306	2.08675e-08	E11.5-5
Ank2	1.8769e-10	0.353978	0.889	0.834	5.25495e-06	E11.5-5
Apba2	1.11019e-11	0.348656	0.915	0.797	3.1083e-07	E11.5-5
Resp18	2.32931e-08	0.3473	0.709	0.528	0.000652161	E11.5-5
Cpne5	2.12824e-33	0.345018	0.538	0.13	5.95863e-29	E11.5-5
Kif21a	2.20717e-11	0.344282	0.846	0.672	6.17964e-07	E11.5-5
Gng3	1.25207e-10	0.33974	0.915	0.895	3.50555e-06	E11.5-5
Snhg11	2.18919e-09	0.337226	0.915	0.789	6.12929e-05	E11.5-5
Mir124-2hg	4.5017e-17	0.333183	0.846	0.406	1.26039e-12	E11.5-5
Hmgcs1	1.0116e-09	0.329184	0.966	0.941	2.83227e-05	E11.5-5
Nus1	2.52794e-15	0.328038	0.761	0.516	7.07771e-11	E11.5-5
Hmgb2	0.00499008	0.326244	0.821	0.701	1	E11.5-5
Gfra1	2.117e-10	0.324135	0.709	0.486	5.92717e-06	E11.5-5
Kif26a	3.95022e-16	0.319335	0.675	0.336	1.10598e-11	E11.5-5
Crip1	2.56749e-06	0.316325	0.607	0.433	0.0718845	E11.5-5
Gnaz	9.97539e-11	0.315677	0.786	0.61	2.79291e-06	E11.5-5
Ttc9b	1.91746e-10	0.312804	0.829	0.67	5.36851e-06	E11.5-5
Tmsb4x	8.54002e-19	0.312742	1	1	2.39103e-14	E11.5-5
Metrn	2.03457e-17	0.311598	0.59	0.259	5.6964e-13	E11.5-5
Bmp7	7.88493e-09	0.310977	0.607	0.4	0.000220762	E11.5-5
Parvb	3.33055e-09	0.307177	0.726	0.532	9.32486e-05	E11.5-5
Cntnap2	2.8477e-05	0.306512	0.684	0.49	0.7973	E11.5-5
Stmn4	7.27278e-07	0.30535	0.915	0.802	0.0203623	E11.5-5
Tmcc2	6.08141e-16	0.303758	0.658	0.348	1.70267e-11	E11.5-5
5930412G12Rik	3.01185e-34	0.299888	0.462	0.091	8.43258e-30	E11.5-5
Tuba1a	4.21814e-17	0.297102	1	1	1.181e-12	E11.5-5
Klhl1	5.6797e-46	0.293198	0.359	0.036	1.5902e-41	E11.5-5
Kctd8	9.28543e-14	0.293057	0.453	0.183	2.59973e-09	E11.5-5
Srrm3	1.50477e-11	0.292421	0.769	0.536	4.21304e-07	E11.5-5
Celf6	5.51065e-11	0.290248	0.701	0.44	1.54287e-06	E11.5-5
Dmrtb1	4.2103e-21	0.29016	0.444	0.125	1.1788e-16	E11.5-5
Rundc3a	1.97484e-10	0.287893	0.906	0.831	5.52917e-06	E11.5-5
Plk2	1.4577e-10	0.286931	0.573	0.308	4.08126e-06	E11.5-5
Tmem178	3.84394e-19	0.284933	0.538	0.198	1.07623e-14	E11.5-5
Cacna2d1	1.24654e-12	0.284405	0.744	0.432	3.49006e-08	E11.5-5
Dek	0.000109135	0.284277	0.829	0.687	1	E11.5-5
Rnd2	4.56798e-11	0.282982	0.564	0.305	1.27894e-06	E11.5-5
Cntn2	1.87192e-15	0.280661	0.436	0.151	5.241e-11	E11.5-5
Idh1	1.72989e-07	0.279099	0.94	0.923	0.00484334	E11.5-5
Nap1l5	1.05374e-06	0.278181	0.795	0.636	0.0295027	E11.5-5
D930028M14Rik	0.000899429	0.277536	0.812	0.683	1	E11.5-5
Ndrg2	1.82064e-12	0.277188	0.538	0.279	5.09742e-08	E11.5-5
Aplp1	9.83959e-10	0.27664	0.923	0.889	2.75489e-05	E11.5-5
Rsrc1	5.99974e-13	0.275414	0.795	0.532	1.67981e-08	E11.5-5
Nkain4	1.78953e-13	0.275254	0.658	0.332	5.01031e-09	E11.5-5
1500009L16Rik	1.17277e-11	0.27445	0.855	0.602	3.28351e-07	E11.5-5
Gabarap	2.00541e-17	0.273927	1	0.999	5.61474e-13	E11.5-5
Pgm2l1	1.11324e-07	0.272833	0.735	0.577	0.00311686	E11.5-5
Atp1a1	3.06824e-08	0.271932	0.658	0.428	0.000859047	E11.5-5
Nrarp	0.000753937	0.27108	0.222	0.119	1	E11.5-5
Pax6	3.75305e-23	0.270809	0.111	0.004	1.05078e-18	E11.5-5
Rab3b	2.6578e-08	0.265402	0.701	0.497	0.00074413	E11.5-5
Atp8a1	1.00653e-13	0.264557	0.598	0.309	2.81809e-09	E11.5-5
Susd4	4.70999e-12	0.26418	0.658	0.36	1.3187e-07	E11.5-5
Cystm1	8.91331e-11	0.26138	0.752	0.471	2.49555e-06	E11.5-5
Shisa4	1.41835e-09	0.260563	0.812	0.633	3.97111e-05	E11.5-5
Map1lc3a	4.67592e-08	0.258965	0.974	0.977	0.00130917	E11.5-5
Chst8	3.37597e-09	0.258843	0.65	0.404	9.45205e-05	E11.5-5
Mycn	3.3855e-09	0.258579	0.658	0.454	9.47873e-05	E11.5-5
Prkaca	1.42552e-10	0.256992	0.974	0.939	3.99117e-06	E11.5-5
Ndufb4	1.81662e-07	0.25591	0.915	0.833	0.00508616	E11.5-5
Gm2464	2.07578e-25	0.25373	0.444	0.108	5.81178e-21	E11.5-5
Cntn5	8.56381e-15	0.253253	0.444	0.169	2.39769e-10	E11.5-5
Tcerg1l	1.50911e-21	0.252991	0.41	0.109	4.22521e-17	E11.5-5
Plppr3	3.48115e-07	0.252773	0.915	0.881	0.00974652	E11.5-5
Rmst	3.41637e-09	0.251903	0.803	0.589	9.56517e-05	E11.5-5
Rtn4rl1	6.53271e-28	0.250176	0.427	0.094	1.82903e-23	E11.5-5
Nr4a2	9.88872e-57	1.63305	0.8	0.165	2.76864e-52	E11.5-6
Meis2	5.22358e-49	1.59585	0.882	0.277	1.4625e-44	E11.5-6
C1qb	4.48549e-12	1.52829	0.129	0.016	1.25585e-07	E11.5-6
Lhx9	1.02085e-90	1.43833	0.871	0.104	2.85819e-86	E11.5-6
Pf4	1.23149e-14	1.41689	0.106	0.008	3.44794e-10	E11.5-6
Lmo3	3.31649e-64	1.33506	0.882	0.191	9.28552e-60	E11.5-6
Fcer1g	1.58651e-14	1.29014	0.129	0.013	4.44191e-10	E11.5-6
Igfbpl1	4.11637e-17	1.28983	0.835	0.701	1.1525e-12	E11.5-6
Atp1b1	2.82501e-33	1.27485	0.906	0.651	7.90947e-29	E11.5-6
C1qc	2.56917e-16	1.27352	0.118	0.008	7.19317e-12	E11.5-6
Nrn1	9.49997e-57	1.23689	0.871	0.197	2.6598e-52	E11.5-6
Tyrobp	2.491e-16	1.21578	0.118	0.008	6.97431e-12	E11.5-6
Pantr1	9.80004e-46	1.19081	0.871	0.299	2.74382e-41	E11.5-6
Khdrbs2	1.11092e-37	1.15766	0.788	0.287	3.11036e-33	E11.5-6
[truncated: 1,075 more rows]

## Sheet: E13.5
Figure 4-Source Data 2 (corresponding to Figure4). Feature genes that define each
subcluster at each of the six developmental stages
Data are sorted from highest to lowest for each subcluster by average log fold-change > 0.25 (avg_logFC)
of gene expression levels in the indicated subcluster relative to all other subclusters.
pct.1, Percentage of cells in the indicated subcluster with significant differential gene expression
pct.2, Percentage of cells in all other subclusters with significant differential gene expression
p-val, p-value
p val adj, adjusted p value for multiple comparisons
The Wilcoxin test was performed to identify differentially expressed genes in each subcluster
Gene	p_val	avg_logFC	pct.1	pct.2	p_val_adj	SubCluster
Ebf1	8.4794e-150	1.39338	0.958	0.299	2.37406e-145	E13.5-1
Kitl	1.98051e-154	1.32358	0.735	0.111	5.54502e-150	E13.5-1
Crabp2	9.5907e-78	1.29116	0.777	0.33	2.6852e-73	E13.5-1
Irx2	1.28067e-162	1.26144	0.926	0.217	3.58561e-158	E13.5-1
Cbln2	1.55529e-90	1.18012	0.884	0.422	4.3545e-86	E13.5-1
Apoe	0.000225774	1.06047	0.098	0.173	1	E13.5-1
Tcf7l2	1.04455e-84	1.02818	0.982	0.679	2.92454e-80	E13.5-1
Nr4a2	1.50618e-58	0.962758	0.801	0.41	4.217e-54	E13.5-1
D930028M14Rik	3.66969e-59	0.94162	0.798	0.378	1.02744e-54	E13.5-1
Irx1	3.91422e-137	0.878416	0.842	0.177	1.0959e-132	E13.5-1
Pou4f1	4.66348e-96	0.875935	0.83	0.234	1.30568e-91	E13.5-1
Tmem35	4.77197e-78	0.863683	0.911	0.512	1.33606e-73	E13.5-1
Pcp4	6.96254e-53	0.853372	0.789	0.408	1.94937e-48	E13.5-1
Dmrtb1	4.54229e-101	0.850787	0.899	0.364	1.27175e-96	E13.5-1
Nrn1	3.89303e-99	0.806831	0.908	0.299	1.08997e-94	E13.5-1
Mast4	3.91303e-95	0.777539	0.705	0.196	1.09557e-90	E13.5-1
Mab21l2	7.87538e-101	0.759783	0.667	0.131	2.20495e-96	E13.5-1
Akr1b3	8.96593e-52	0.744349	0.818	0.552	2.51028e-47	E13.5-1
Tmem163	7.31346e-88	0.730174	0.896	0.393	2.04762e-83	E13.5-1
Plppr1	2.30934e-100	0.727303	0.914	0.386	6.46568e-96	E13.5-1
Nefl	1.13652e-59	0.71623	0.932	0.536	3.18203e-55	E13.5-1
Gabbr1	3.00738e-51	0.694661	0.955	0.847	8.42005e-47	E13.5-1
Sncg	7.36959e-57	0.679132	0.726	0.301	2.06334e-52	E13.5-1
Zic1	1.49036e-61	0.67634	0.872	0.351	4.17271e-57	E13.5-1
Cited2	2.98682e-59	0.665488	0.902	0.614	8.36251e-55	E13.5-1
Cadm1	3.53933e-51	0.665202	0.851	0.452	9.90941e-47	E13.5-1
Pou6f2	1.98288e-78	0.645952	0.735	0.219	5.55166e-74	E13.5-1
Epha5	2.11951e-60	0.640639	0.72	0.301	5.9342e-56	E13.5-1
Onecut2	4.39498e-62	0.639645	0.801	0.358	1.23051e-57	E13.5-1
Ptprr	8.70564e-65	0.63363	0.5	0.116	2.4374e-60	E13.5-1
Evc2	6.75791e-89	0.577748	0.518	0.084	1.89208e-84	E13.5-1
Olfm1	2.48434e-63	0.568232	0.982	0.808	6.95565e-59	E13.5-1
Lhx9	1.33794e-87	0.561171	0.845	0.236	3.74596e-83	E13.5-1
Cxxc5	3.58245e-68	0.551193	0.908	0.423	1.00301e-63	E13.5-1
Nefm	1.83257e-39	0.535487	0.753	0.434	5.13084e-35	E13.5-1
Ociad2	3.07239e-56	0.531149	0.702	0.301	8.60209e-52	E13.5-1
Chst2	3.33417e-55	0.521018	0.693	0.255	9.335e-51	E13.5-1
Pou2f2	2.28283e-29	0.51496	0.932	0.783	6.39146e-25	E13.5-1
1810041L15Rik	7.28674e-50	0.507418	0.625	0.231	2.04014e-45	E13.5-1
Sox1	6.85542e-30	0.504459	0.702	0.458	1.91938e-25	E13.5-1
Rprm	1.02461e-32	0.496096	0.702	0.397	2.86871e-28	E13.5-1
Chl1	3.86058e-49	0.494219	0.738	0.329	1.08089e-44	E13.5-1
Msi2	2.97996e-41	0.494191	0.857	0.585	8.34329e-37	E13.5-1
Islr2	1.06201e-41	0.494035	0.97	0.695	2.97342e-37	E13.5-1
Lmo3	1.01583e-33	0.481077	0.827	0.522	2.84412e-29	E13.5-1
Ube2e3	4.04428e-52	0.480842	0.988	0.985	1.13232e-47	E13.5-1
Nrp2	1.05479e-55	0.476089	0.685	0.246	2.9532e-51	E13.5-1
Cplx2	7.57613e-45	0.472596	0.78	0.416	2.12116e-40	E13.5-1
Socs2	6.2242e-37	0.467864	0.726	0.405	1.74265e-32	E13.5-1
Negr1	9.19175e-43	0.463343	0.807	0.465	2.57351e-38	E13.5-1
Snhg11	1.03101e-31	0.462346	0.952	0.688	2.88662e-27	E13.5-1
Ctnnb1	7.13243e-46	0.460195	0.961	0.85	1.99694e-41	E13.5-1
Wif1	3.13365e-48	0.459961	0.396	0.086	8.77359e-44	E13.5-1
Zic4	5.18597e-32	0.45696	0.586	0.255	1.45197e-27	E13.5-1
Cdh8	1.48075e-70	0.451938	0.562	0.134	4.14579e-66	E13.5-1
Fam19a2	5.65319e-24	0.44933	0.571	0.327	1.58278e-19	E13.5-1
Mir124-2hg	5.6677e-46	0.443727	0.842	0.397	1.58684e-41	E13.5-1
Fam84a	1.06728e-31	0.431618	0.411	0.149	2.98817e-27	E13.5-1
Nhlh2	6.2505e-37	0.431538	0.949	0.728	1.75002e-32	E13.5-1
Cpe	1.19969e-42	0.427234	0.985	0.923	3.3589e-38	E13.5-1
Ckb	1.27614e-46	0.422501	0.994	0.947	3.57294e-42	E13.5-1
Pantr1	1.0015e-50	0.41875	0.613	0.2	2.80399e-46	E13.5-1
Runx1t1	1.65713e-33	0.414021	0.935	0.768	4.63962e-29	E13.5-1
Cpne4	2.08246e-40	0.401668	0.595	0.239	5.83047e-36	E13.5-1
Necab2	3.19762e-48	0.398816	0.836	0.445	8.95269e-44	E13.5-1
Lin7a	6.48985e-33	0.393612	0.705	0.384	1.81703e-28	E13.5-1
Tubb2a	1.36256e-33	0.38638	0.997	0.971	3.81489e-29	E13.5-1
Prnp	1.18867e-36	0.384911	0.869	0.611	3.32803e-32	E13.5-1
Cttnbp2	5.2821e-30	0.383708	0.708	0.393	1.47888e-25	E13.5-1
Bzw2	2.18484e-35	0.381951	0.958	0.888	6.11713e-31	E13.5-1
Nr2f2	4.5586e-28	0.376787	0.69	0.379	1.27632e-23	E13.5-1
Mapk10	4.58535e-35	0.375204	0.821	0.519	1.28381e-30	E13.5-1
Cabp1	4.31938e-62	0.359944	0.482	0.11	1.20934e-57	E13.5-1
Ina	5.9749e-34	0.359928	0.997	0.944	1.67285e-29	E13.5-1
Elavl4	3.83571e-23	0.355911	0.988	0.907	1.07392e-18	E13.5-1
Lrfn5	1.03833e-32	0.348979	0.574	0.257	2.90712e-28	E13.5-1
Vstm2b	2.78745e-32	0.34306	0.64	0.3	7.8043e-28	E13.5-1
Tubb4a	4.38553e-28	0.33809	0.952	0.84	1.22786e-23	E13.5-1
Tmem130	1.40426e-29	0.33782	0.83	0.569	3.93166e-25	E13.5-1
Asic1	1.70326e-42	0.334974	0.649	0.282	4.76878e-38	E13.5-1
Elmo1	5.08989e-26	0.334629	0.723	0.433	1.42507e-21	E13.5-1
Insm1	3.66318e-25	0.332025	0.542	0.252	1.02562e-20	E13.5-1
Rgma	1.33679e-42	0.331939	0.726	0.328	3.74274e-38	E13.5-1
Pcdh10	5.27748e-25	0.330454	0.693	0.424	1.47759e-20	E13.5-1
Fign	3.02967e-39	0.329427	0.521	0.185	8.48247e-35	E13.5-1
Rtn3	2.26819e-38	0.324026	0.991	0.986	6.35049e-34	E13.5-1
Igfbpl1	6.97297e-19	0.32278	0.869	0.67	1.95229e-14	E13.5-1
Cisd1	2.88528e-29	0.319447	0.943	0.827	8.07821e-25	E13.5-1
Shox2	1.68639e-41	0.317925	0.387	0.101	4.72157e-37	E13.5-1
Ntm	7.90709e-14	0.317485	0.643	0.435	2.21383e-09	E13.5-1
Resp18	6.65451e-23	0.317319	0.908	0.692	1.86313e-18	E13.5-1
Id4	8.2461e-20	0.314347	0.461	0.234	2.30874e-15	E13.5-1
Robo1	1.04643e-28	0.312128	0.72	0.414	2.92981e-24	E13.5-1
Gng8	7.57054e-37	0.312083	0.497	0.158	2.1196e-32	E13.5-1
Cacng2	3.44323e-24	0.307672	0.524	0.274	9.64035e-20	E13.5-1
Plk2	7.26577e-22	0.307559	0.655	0.399	2.03427e-17	E13.5-1
Meaf6	4.08004e-27	0.306626	0.92	0.772	1.14233e-22	E13.5-1
Parvb	6.50931e-18	0.306132	0.521	0.297	1.82248e-13	E13.5-1
Zcchc12	9.31863e-24	0.296635	0.875	0.687	2.60903e-19	E13.5-1
Tuba1a	6.51e-34	0.296431	1	1	1.82267e-29	E13.5-1
Chd3os	7.23797e-25	0.295175	0.908	0.718	2.02649e-20	E13.5-1
Atp1b1	7.21681e-20	0.29514	0.887	0.673	2.02056e-15	E13.5-1
Ephb1	5.30707e-23	0.29383	0.738	0.454	1.48587e-18	E13.5-1
Map7d2	1.3389e-25	0.292326	0.679	0.377	3.74865e-21	E13.5-1
Rftn1	1.6728e-47	0.291584	0.339	0.066	4.68352e-43	E13.5-1
Nrsn1	1.35707e-13	0.291452	0.625	0.418	3.79954e-09	E13.5-1
Prmt8	7.11552e-15	0.290788	0.583	0.393	1.9922e-10	E13.5-1
Nsg2	1.96876e-28	0.290354	0.985	0.895	5.51213e-24	E13.5-1
Gpm6a	7.3576e-27	0.289892	0.964	0.838	2.05998e-22	E13.5-1
Mgat4c	2.35283e-33	0.284936	0.39	0.119	6.58746e-29	E13.5-1
Cnih2	3.9569e-26	0.284818	0.985	0.951	1.10785e-21	E13.5-1
Gap43	9.04501e-21	0.283931	0.994	0.974	2.53242e-16	E13.5-1
Paqr8	2.72163e-39	0.283358	0.408	0.121	7.62003e-35	E13.5-1
Cpne8	3.6212e-46	0.281377	0.354	0.071	1.01386e-41	E13.5-1
Fam78b	3.67149e-20	0.27991	0.64	0.402	1.02794e-15	E13.5-1
Gpr162	1.05264e-21	0.279867	0.714	0.467	2.94719e-17	E13.5-1
Mdga1	3.72035e-47	0.279094	0.494	0.137	1.04162e-42	E13.5-1
Srrm3	2.38452e-22	0.278922	0.714	0.472	6.67617e-18	E13.5-1
Wscd1	5.28364e-23	0.278912	0.42	0.184	1.47931e-18	E13.5-1
Cdo1	1.07193e-24	0.278256	0.601	0.32	3.00118e-20	E13.5-1
Psap	1.72348e-20	0.275463	0.946	0.859	4.82539e-16	E13.5-1
Nxn	1.00991e-19	0.273314	0.676	0.45	2.82755e-15	E13.5-1
Atp2b1	1.75307e-18	0.273246	0.86	0.679	4.90823e-14	E13.5-1
Lef1	2.29091e-22	0.272336	0.464	0.208	6.41409e-18	E13.5-1
Rsrc1	4.6991e-26	0.272217	0.658	0.386	1.31566e-21	E13.5-1
Ctsd	1.43564e-05	0.27221	0.702	0.587	0.401951	E13.5-1
Rnf152	5.57239e-17	0.271579	0.521	0.307	1.56016e-12	E13.5-1
Stmn4	3.8649e-18	0.270105	0.979	0.901	1.08209e-13	E13.5-1
B3gat1	3.13554e-22	0.269378	0.765	0.512	8.77889e-18	E13.5-1
Gsto1	2.40009e-19	0.268502	0.741	0.542	6.71976e-15	E13.5-1
Ndufb4	1.4021e-19	0.267475	0.923	0.824	3.92561e-15	E13.5-1
Tspan13	4.44847e-30	0.263953	0.991	0.95	1.24548e-25	E13.5-1
Prkcb	8.82502e-24	0.2638	0.494	0.238	2.47083e-19	E13.5-1
Pcsk2	1.47836e-21	0.262786	0.637	0.334	4.1391e-17	E13.5-1
Tspan7	6.81636e-14	0.261658	0.815	0.692	1.90845e-09	E13.5-1
Dusp26	1.19215e-19	0.261386	0.899	0.684	3.33778e-15	E13.5-1
Nrxn1	5.16607e-15	0.259863	0.896	0.768	1.4464e-10	E13.5-1
Dpysl3	3.73318e-19	0.2578	0.994	0.947	1.04522e-14	E13.5-1
Sat1	1.25629e-12	0.254724	0.53	0.347	3.51737e-08	E13.5-1
Serinc3	1.48689e-14	0.253781	0.78	0.643	4.163e-10	E13.5-1
Clmp	3.75976e-16	0.252775	0.801	0.607	1.05266e-11	E13.5-1
Cacnb3	7.62551e-20	0.252316	0.958	0.879	2.13499e-15	E13.5-1
Pkig	2.98925e-22	0.251667	0.824	0.557	8.3693e-18	E13.5-1
Ctnnd2	1.65523e-20	0.250933	0.756	0.49	4.6343e-16	E13.5-1
Chchd10	3.01864e-136	1.29172	0.955	0.376	8.45159e-132	E13.5-2
Nkx2-1	3.85739e-135	1.18874	0.991	0.379	1.07999e-130	E13.5-2
S100a10	3.55426e-111	1.17128	0.985	0.546	9.95121e-107	E13.5-2
Sox14	6.25007e-128	1.12194	0.869	0.229	1.74989e-123	E13.5-2
Sox2	8.76331e-131	1.00862	0.961	0.298	2.45355e-126	E13.5-2
Six6	1.19194e-109	0.995533	0.92	0.309	3.33719e-105	E13.5-2
Six3	1.62189e-112	0.91661	0.988	0.353	4.54097e-108	E13.5-2
Pomc	5.50745e-45	0.835261	1	1	1.54198e-40	E13.5-2
Prdm12	5.71127e-117	0.798385	0.798	0.199	1.59904e-112	E13.5-2
Sox3	7.77176e-98	0.752903	0.729	0.195	2.17594e-93	E13.5-2
Nr5a1	3.29051e-130	0.721053	0.845	0.195	9.21277e-126	E13.5-2
Nptx2	3.18917e-81	0.718418	0.744	0.239	8.92904e-77	E13.5-2
Nell2	1.93167e-88	0.708665	0.97	0.625	5.40828e-84	E13.5-2
Rbp1	5.09026e-59	0.668541	0.887	0.445	1.42517e-54	E13.5-2
Calb1	4.73884e-43	0.667938	0.518	0.171	1.32678e-38	E13.5-2
Pea15a	3.96808e-79	0.666533	0.988	0.699	1.11098e-74	E13.5-2
Syt4	1.83613e-39	0.603705	0.893	0.592	5.1408e-35	E13.5-2
Isl1	3.87072e-45	0.575585	0.833	0.382	1.08372e-40	E13.5-2
Ldha	1.79448e-39	0.558693	0.89	0.647	5.02419e-35	E13.5-2
Shtn1	5.87015e-73	0.557916	0.824	0.328	1.64352e-68	E13.5-2
Hmgb3	1.39596e-77	0.504003	1	0.978	3.9084e-73	E13.5-2
Fdps	1.56506e-35	0.50185	0.923	0.779	4.38185e-31	E13.5-2
Cnr1	2.5797e-54	0.492406	0.863	0.425	7.22265e-50	E13.5-2
Mgst3	1.00184e-43	0.491863	0.946	0.782	2.80496e-39	E13.5-2
Kcnk12	9.61792e-74	0.490467	0.661	0.186	2.69283e-69	E13.5-2
Mif	3.15441e-68	0.483303	1	0.993	8.83171e-64	E13.5-2
Nr0b1	1.08008e-80	0.476598	0.545	0.105	3.024e-76	E13.5-2
Aldoa	1.26253e-55	0.467529	0.994	0.911	3.53484e-51	E13.5-2
Tagln2	1.83346e-23	0.465798	0.521	0.258	5.13333e-19	E13.5-2
Crtac1	1.0531e-78	0.456041	0.542	0.109	2.94846e-74	E13.5-2
Vat1l	2.84585e-49	0.451973	0.866	0.477	7.9678e-45	E13.5-2
Slc25a5	4.67456e-28	0.44887	0.994	0.942	1.30878e-23	E13.5-2
Magel2	5.80823e-52	0.448381	0.881	0.432	1.62619e-47	E13.5-2
Myc	1.48851e-59	0.442551	0.676	0.238	4.16754e-55	E13.5-2
Ap1s2	8.57775e-33	0.437389	0.899	0.648	2.4016e-28	E13.5-2
Pink1	1.10082e-45	0.433875	0.902	0.597	3.08208e-41	E13.5-2
H2-Ab1	6.65011e-45	0.432519	0.503	0.147	1.8619e-40	E13.5-2
Gm2694	2.56177e-37	0.430715	0.908	0.614	7.17244e-33	E13.5-2
Ppp1r14b	6.65279e-51	0.429596	0.997	0.903	1.86265e-46	E13.5-2
Cbln1	4.08169e-34	0.388621	0.759	0.391	1.14279e-29	E13.5-2
Klf6	6.17426e-33	0.387402	0.878	0.592	1.72867e-28	E13.5-2
Nnat	1.26824e-44	0.385477	1	1	3.55081e-40	E13.5-2
Mpped2	2.77326e-34	0.385018	0.973	0.759	7.76458e-30	E13.5-2
Rbfox1	1.19876e-35	0.383627	0.699	0.342	3.3563e-31	E13.5-2
Manf	7.55166e-31	0.383401	0.926	0.768	2.11431e-26	E13.5-2
Gapdh	1.42543e-67	0.381534	1	1	3.99091e-63	E13.5-2
Tpi1	6.06667e-29	0.379368	0.964	0.877	1.69855e-24	E13.5-2
Bcl11a	2.14673e-44	0.377466	0.949	0.634	6.01042e-40	E13.5-2
Eif4a1	1.04838e-59	0.376804	1	0.999	2.93526e-55	E13.5-2
Arhgdig	2.25628e-26	0.372153	0.72	0.424	6.31714e-22	E13.5-2
Rac3	5.77619e-31	0.371972	0.961	0.901	1.61722e-26	E13.5-2
Thra	7.7074e-38	0.365389	0.991	0.953	2.15792e-33	E13.5-2
Mapk3	1.22189e-35	0.364076	0.943	0.759	3.42105e-31	E13.5-2
Sox21	1.38701e-59	0.363059	0.446	0.086	3.88336e-55	E13.5-2
Acot7	1.25259e-27	0.362006	0.926	0.784	3.50701e-23	E13.5-2
Aprt	4.1446e-35	0.358584	0.926	0.709	1.16041e-30	E13.5-2
Fabp5	3.36829e-62	0.35806	1	0.993	9.43055e-58	E13.5-2
Thsd4	1.7156e-48	0.357889	0.646	0.233	4.80333e-44	E13.5-2
Gnai2	9.8232e-39	0.355809	0.994	0.923	2.7503e-34	E13.5-2
Sox11	1.18295e-28	0.354575	1	0.984	3.31201e-24	E13.5-2
Islr2	2.1613e-26	0.354498	0.958	0.698	6.05122e-22	E13.5-2
Lxn	7.12317e-20	0.348175	0.616	0.376	1.99434e-15	E13.5-2
Acat2	2.03983e-27	0.34804	0.946	0.846	5.71111e-23	E13.5-2
Bcl11b	6.559e-32	0.347832	0.548	0.234	1.83639e-27	E13.5-2
Fam131c	8.98892e-37	0.346256	0.598	0.256	2.51672e-32	E13.5-2
Reep5	1.22617e-33	0.343868	0.976	0.91	3.43304e-29	E13.5-2
Eno1	1.0147e-25	0.343448	0.955	0.875	2.84096e-21	E13.5-2
Stmn2	2.11225e-50	0.337237	1	0.962	5.91387e-46	E13.5-2
Zdhhc2	1.3016e-39	0.336235	0.69	0.316	3.64422e-35	E13.5-2
Tle4	5.25286e-30	0.336035	0.899	0.579	1.4707e-25	E13.5-2
Sema6a	5.96372e-29	0.334304	0.818	0.51	1.66972e-24	E13.5-2
Dpysl4	2.76512e-25	0.332153	0.938	0.752	7.74179e-21	E13.5-2
Calm2	7.95834e-39	0.330608	1	0.997	2.22817e-34	E13.5-2
Stmn3	1.20182e-44	0.329587	1	0.962	3.36487e-40	E13.5-2
Prdx1	1.45224e-32	0.328502	0.985	0.832	4.06598e-28	E13.5-2
Klf7	1.37062e-26	0.325932	0.973	0.853	3.83746e-22	E13.5-2
Uchl1	7.34012e-32	0.32581	0.994	0.945	2.05509e-27	E13.5-2
Eif5a	2.94382e-48	0.325612	1	0.994	8.24212e-44	E13.5-2
Aes	6.21322e-24	0.315823	0.997	0.922	1.73958e-19	E13.5-2
Tox	1.01388e-34	0.314283	0.714	0.347	2.83867e-30	E13.5-2
Arhgdia	3.01114e-31	0.311325	0.994	0.92	8.43059e-27	E13.5-2
Serpine2	7.33842e-18	0.311088	0.503	0.26	2.05461e-13	E13.5-2
Calm3	1.92722e-47	0.308188	1	0.993	5.39583e-43	E13.5-2
S100g	1.15823e-47	0.304645	0.333	0.06	3.24282e-43	E13.5-2
Hint1	4.18019e-46	0.304037	1	0.993	1.17037e-41	E13.5-2
Tox3	3.10494e-27	0.302738	0.878	0.563	8.69322e-23	E13.5-2
Nme1	3.91615e-42	0.301722	1	0.992	1.09644e-37	E13.5-2
Prr5	4.25262e-39	0.301248	0.607	0.258	1.19065e-34	E13.5-2
Rab3a	4.52936e-25	0.295816	0.982	0.913	1.26813e-20	E13.5-2
Coro1c	2.87701e-25	0.291868	0.964	0.778	8.05504e-21	E13.5-2
Mrps11	2.89202e-20	0.291468	0.789	0.578	8.09707e-16	E13.5-2
Tspan17	2.59016e-23	0.285878	0.756	0.454	7.25194e-19	E13.5-2
Carhsp1	1.49288e-23	0.284979	0.979	0.857	4.17976e-19	E13.5-2
Ranbp1	6.48936e-35	0.280784	1	0.976	1.81689e-30	E13.5-2
Morf4l2	3.91414e-37	0.279871	1	0.986	1.09588e-32	E13.5-2
Mvd	3.00831e-19	0.279599	0.667	0.438	8.42267e-15	E13.5-2
Ppp1r1a	1.15059e-28	0.278933	0.938	0.705	3.22142e-24	E13.5-2
Klhl5	1.05001e-35	0.276792	0.497	0.182	2.93982e-31	E13.5-2
Prdx6	1.99887e-18	0.276413	0.857	0.683	5.59642e-14	E13.5-2
Kcnk2	9.27377e-21	0.275575	0.708	0.416	2.59647e-16	E13.5-2
Tkt	1.04723e-18	0.274349	0.917	0.788	2.93204e-14	E13.5-2
Ptn	9.18146e-43	0.273456	0.952	0.602	2.57063e-38	E13.5-2
Prkce	1.62674e-26	0.273292	0.688	0.361	4.55454e-22	E13.5-2
Cnp	6.28684e-30	0.272922	0.607	0.292	1.76019e-25	E13.5-2
Psme1	2.50112e-15	0.271857	0.869	0.707	7.00264e-11	E13.5-2
Hs3st5	1.22833e-30	0.268563	0.476	0.182	3.43907e-26	E13.5-2
Gng5	1.20088e-21	0.268438	0.997	0.905	3.36222e-17	E13.5-2
Rap1gap	9.52475e-33	0.267522	0.598	0.261	2.66674e-28	E13.5-2
Tpm3	1.1557e-16	0.267482	0.946	0.842	3.23572e-12	E13.5-2
Peg12	1.67811e-37	0.266679	0.429	0.129	4.69837e-33	E13.5-2
Mrps6	3.26906e-18	0.266644	0.842	0.621	9.1527e-14	E13.5-2
Mbip	3.144e-26	0.266567	0.595	0.305	8.80256e-22	E13.5-2
Tbcb	9.98163e-28	0.266348	0.985	0.935	2.79466e-23	E13.5-2
Srrm4	4.5178e-31	0.264985	0.702	0.342	1.26489e-26	E13.5-2
Rnd3	9.49041e-22	0.26459	0.845	0.56	2.65713e-17	E13.5-2
Xpr1	6.27416e-19	0.264202	0.952	0.762	1.75664e-14	E13.5-2
Fdft1	8.62692e-15	0.263925	0.902	0.782	2.41536e-10	E13.5-2
Txndc17	2.88154e-20	0.26315	0.952	0.855	8.06774e-16	E13.5-2
Coro1a	8.31139e-22	0.261697	0.741	0.479	2.32702e-17	E13.5-2
Sez6	1.14544e-21	0.260433	0.589	0.316	3.20702e-17	E13.5-2
Plp1	3.53454e-24	0.259975	0.476	0.208	9.896e-20	E13.5-2
Arf6	1.49913e-14	0.259321	0.741	0.518	4.19725e-10	E13.5-2
Mvk	1.14056e-20	0.258897	0.688	0.447	3.19335e-16	E13.5-2
Anp32a	8.03219e-20	0.258425	0.935	0.761	2.24885e-15	E13.5-2
Robo2	1.12913e-25	0.257543	0.845	0.499	3.16133e-21	E13.5-2
Ssbp2	2.84358e-19	0.257516	0.938	0.76	7.96145e-15	E13.5-2
Fbxo44	1.58682e-23	0.255889	0.833	0.542	4.44278e-19	E13.5-2
Cdk4	4.0606e-25	0.252719	0.997	0.982	1.13689e-20	E13.5-2
Cyp51	8.04727e-14	0.252535	0.818	0.688	2.25307e-09	E13.5-2
Cckar	8.04044e-28	0.250657	0.408	0.145	2.25116e-23	E13.5-2
Atf4	2.09287e-14	0.250536	0.946	0.796	5.85962e-10	E13.5-2
Pomc	2.80118e-57	0.936283	1	1	7.84273e-53	E13.5-3
Tagln2	1.22702e-79	0.916555	0.752	0.229	3.43541e-75	E13.5-3
Ap1s2	1.01489e-80	0.885267	0.952	0.649	2.84148e-76	E13.5-3
S100a10	1.31486e-69	0.88154	0.981	0.566	3.68135e-65	E13.5-3
Cd44	1.18017e-107	0.855824	0.589	0.079	3.30424e-103	E13.5-3
Arhgdig	1.19778e-87	0.849439	0.904	0.404	3.35354e-83	E13.5-3
Tspan17	3.50966e-86	0.840894	0.9	0.442	9.82635e-82	E13.5-3
Lxn	4.40855e-81	0.807197	0.859	0.343	1.23431e-76	E13.5-3
Nkx2-1	6.86142e-69	0.802987	0.985	0.406	1.92106e-64	E13.5-3
Chchd10	8.47422e-67	0.703138	0.952	0.402	2.37261e-62	E13.5-3
Igfbp5	3.28327e-68	0.687598	0.726	0.231	9.19249e-64	E13.5-3
Snca	2.46219e-31	0.674618	0.578	0.266	6.89365e-27	E13.5-3
H2-Ab1	6.31822e-90	0.670465	0.667	0.133	1.76898e-85	E13.5-3
Snhg11	7.96543e-27	0.669203	0.874	0.714	2.23016e-22	E13.5-3
Six3	4.8404e-63	0.664086	0.956	0.386	1.35522e-58	E13.5-3
Cbln1	4.33712e-71	0.662807	0.911	0.38	1.21431e-66	E13.5-3
Sox2	1.25862e-66	0.622388	0.93	0.332	3.52388e-62	E13.5-3
Sox14	5.80461e-84	0.599427	0.911	0.249	1.62518e-79	E13.5-3
Pea15a	3.07454e-59	0.598527	0.996	0.71	8.60811e-55	E13.5-3
Rac3	3.57958e-62	0.596409	0.993	0.898	1.00221e-57	E13.5-3
Gm2694	1.54509e-47	0.56321	0.974	0.615	4.32594e-43	E13.5-3
Kcnk2	4.64316e-64	0.552374	0.9	0.394	1.29999e-59	E13.5-3
Nptx2	1.98307e-69	0.544497	0.807	0.25	5.55219e-65	E13.5-3
Hpcal1	2.84222e-47	0.542744	0.933	0.66	7.95766e-43	E13.5-3
Isl1	4.75806e-51	0.535213	0.93	0.384	1.33216e-46	E13.5-3
Mpped2	9.56458e-48	0.530766	0.963	0.77	2.67789e-43	E13.5-3
Robo2	5.25102e-58	0.525354	0.941	0.497	1.47018e-53	E13.5-3
Vat1l	1.96872e-51	0.511247	0.915	0.486	5.51202e-47	E13.5-3
Nkain3	9.18117e-54	0.510334	0.737	0.292	2.57054e-49	E13.5-3
Prkce	1.16021e-56	0.509891	0.8	0.355	3.24836e-52	E13.5-3
Rbfox1	1.47969e-64	0.489992	0.885	0.325	4.14284e-60	E13.5-3
Gng5	2.77694e-48	0.48877	0.989	0.911	7.77486e-44	E13.5-3
Nefl	5.20177e-21	0.486493	0.867	0.565	1.45639e-16	E13.5-3
Tle4	9.73431e-48	0.478425	0.959	0.582	2.72541e-43	E13.5-3
Ubash3b	5.76751e-41	0.477825	0.607	0.24	1.61479e-36	E13.5-3
Vstm2a	1.21969e-54	0.477743	0.822	0.337	3.41488e-50	E13.5-3
Mapk3	1.86698e-44	0.472877	0.959	0.764	5.22717e-40	E13.5-3
Vim	2.69158e-28	0.460327	0.941	0.751	7.53587e-24	E13.5-3
Rps26	1.22962e-78	0.459423	1	0.996	3.44269e-74	E13.5-3
Rpl32	5.51578e-97	0.458054	1	0.998	1.54431e-92	E13.5-3
Nell2	7.81068e-38	0.450916	0.948	0.644	2.18683e-33	E13.5-3
Thsd4	2.59243e-72	0.448321	0.77	0.229	7.25829e-68	E13.5-3
Mif	2.64816e-48	0.446545	1	0.993	7.41432e-44	E13.5-3
Rps3a1	2.04035e-82	0.445066	1	0.999	5.71257e-78	E13.5-3
Xpr1	1.39507e-39	0.437862	0.985	0.764	3.90591e-35	E13.5-3
Enho	1.30516e-33	0.435889	0.893	0.644	3.65418e-29	E13.5-3
Hs3st5	1.57747e-71	0.435703	0.659	0.163	4.41661e-67	E13.5-3
Sepw1	7.20654e-64	0.433427	1	0.997	2.01769e-59	E13.5-3
Rplp0	2.19057e-77	0.432855	1	0.997	6.13315e-73	E13.5-3
Rps19	8.09065e-80	0.4268	1	0.999	2.26522e-75	E13.5-3
Nr5a1	7.64289e-67	0.4242	0.804	0.23	2.13986e-62	E13.5-3
Rpl10	5.68235e-77	0.420045	1	0.999	1.59095e-72	E13.5-3
Peg3	2.44075e-41	0.414943	0.985	0.752	6.8336e-37	E13.5-3
Eef2	2.44638e-70	0.413614	1	1	6.84938e-66	E13.5-3
Rpl37	2.17144e-87	0.413415	1	0.998	6.07958e-83	E13.5-3
Rps12	2.80457e-59	0.403325	1	0.991	7.85224e-55	E13.5-3
Rpl29	9.49521e-81	0.400477	1	0.999	2.65847e-76	E13.5-3
Syt4	1.31879e-35	0.399559	0.952	0.594	3.69235e-31	E13.5-3
Pink1	5.51052e-33	0.398754	0.9	0.61	1.54284e-28	E13.5-3
Rps7	1.14422e-86	0.398414	1	1	3.2036e-82	E13.5-3
Aim1	7.64316e-89	0.396853	0.493	0.06	2.13993e-84	E13.5-3
Rpl23	1.71392e-82	0.393257	1	0.999	4.79865e-78	E13.5-3
Prr13	1.23582e-32	0.392749	0.941	0.787	3.46005e-28	E13.5-3
Pcbd1	1.50051e-26	0.388141	0.837	0.55	4.20113e-22	E13.5-3
Ppp1r1a	8.28489e-37	0.38767	0.959	0.711	2.3196e-32	E13.5-3
Rps2	6.02204e-57	0.384332	1	0.999	1.68605e-52	E13.5-3
Stmn2	3.95329e-53	0.382326	1	0.964	1.10684e-48	E13.5-3
Rpl12	1.44728e-47	0.381316	1	0.974	4.05209e-43	E13.5-3
Cnr1	1.41655e-38	0.380251	0.881	0.441	3.96606e-34	E13.5-3
Ppp2r2c	3.25519e-42	0.380119	0.741	0.322	9.11389e-38	E13.5-3
Fezf1	5.23468e-39	0.380047	0.285	0.048	1.4656e-34	E13.5-3
Rps5	5.47745e-79	0.377229	1	0.999	1.53358e-74	E13.5-3
Fabp3	6.52701e-31	0.375166	0.8	0.476	1.82743e-26	E13.5-3
Rpl38	9.38312e-64	0.373966	1	0.997	2.62708e-59	E13.5-3
Kcnk12	4.93964e-55	0.373905	0.685	0.202	1.383e-50	E13.5-3
Rpl31	4.9174e-68	0.372236	1	1	1.37677e-63	E13.5-3
Rps3	1.97905e-63	0.37198	1	0.999	5.54094e-59	E13.5-3
Dpysl2	3.02038e-29	0.371193	0.996	0.978	8.45645e-25	E13.5-3
Clec2l	6.7341e-50	0.370286	0.67	0.237	1.88541e-45	E13.5-3
Mt3	3.13546e-32	0.370224	0.685	0.324	8.77867e-28	E13.5-3
Rps18	3.32654e-63	0.367846	1	1	9.31363e-59	E13.5-3
Eef1g	3.97846e-63	0.365669	1	0.997	1.11389e-58	E13.5-3
Stk32c	3.95966e-38	0.365201	0.733	0.345	1.10863e-33	E13.5-3
Clstn2	8.27428e-74	0.363443	0.485	0.076	2.31663e-69	E13.5-3
Sgk1	1.64519e-54	0.361524	0.633	0.191	4.60621e-50	E13.5-3
Alcam	3.27007e-25	0.355655	0.448	0.174	9.15556e-21	E13.5-3
Ank2	1.84322e-29	0.355455	0.967	0.826	5.16065e-25	E13.5-3
Bex1	1.17112e-32	0.353879	1	0.893	3.27891e-28	E13.5-3
Rpl17	1.11254e-69	0.352669	1	0.999	3.11488e-65	E13.5-3
Guk1	1.06401e-33	0.350436	0.963	0.794	2.97902e-29	E13.5-3
L1cam	3.16117e-29	0.348706	0.915	0.647	8.85065e-25	E13.5-3
Rpl21	9.78602e-75	0.348304	1	0.999	2.73989e-70	E13.5-3
Klf6	3.89672e-22	0.347964	0.863	0.607	1.091e-17	E13.5-3
Mgst3	4.95703e-20	0.347842	0.963	0.786	1.38787e-15	E13.5-3
Pcsk1n	1.91156e-29	0.344508	0.996	0.944	5.35199e-25	E13.5-3
Serf1	2.73122e-36	0.344294	1	0.973	7.64688e-32	E13.5-3
Eif3f	1.18785e-46	0.342953	1	0.993	3.32574e-42	E13.5-3
Tmeff1	1.06482e-35	0.342594	0.989	0.957	2.98129e-31	E13.5-3
Zdhhc2	1.07688e-31	0.341657	0.7	0.331	3.01504e-27	E13.5-3
Fgf12	4.69937e-72	0.339922	0.596	0.127	1.31573e-67	E13.5-3
Spock1	3.03908e-25	0.337526	0.552	0.258	8.50882e-21	E13.5-3
Rps8	3.12994e-66	0.336736	1	1	8.76321e-62	E13.5-3
Rpl13a	2.01685e-64	0.33649	1	0.999	5.64677e-60	E13.5-3
Ehd3	6.92838e-39	0.336448	0.696	0.298	1.93981e-34	E13.5-3
Rpsa	7.35675e-61	0.335115	1	1	2.05974e-56	E13.5-3
Fkbp1a	5.46497e-41	0.334489	1	0.99	1.53008e-36	E13.5-3
Sms	1.37513e-29	0.332984	0.989	0.875	3.85008e-25	E13.5-3
Calm2	4.15666e-23	0.332672	1	0.997	1.16378e-18	E13.5-3
Rpl10a	1.61438e-50	0.332403	1	0.996	4.51994e-46	E13.5-3
AI413582	1.15414e-30	0.332062	0.63	0.286	3.23137e-26	E13.5-3
Rplp2	6.26402e-60	0.332044	1	0.999	1.7538e-55	E13.5-3
Bex4	1.09579e-27	0.330992	0.974	0.839	3.06799e-23	E13.5-3
Gnao1	9.92141e-27	0.330676	0.981	0.818	2.7778e-22	E13.5-3
Rpl19	1.01374e-73	0.330416	1	0.999	2.83826e-69	E13.5-3
Rps11	7.7967e-67	0.329459	1	1	2.18292e-62	E13.5-3
Ppp1r16b	1.03566e-47	0.328948	0.537	0.148	2.89965e-43	E13.5-3
Rpl14	1.0085e-63	0.326282	1	1	2.82359e-59	E13.5-3
Rpl3	3.96898e-54	0.326116	1	0.999	1.11124e-49	E13.5-3
Shtn1	1.03981e-36	0.324066	0.781	0.357	2.91125e-32	E13.5-3
Rpl26	4.63073e-62	0.323508	1	0.997	1.29651e-57	E13.5-3
Rpl35	1.84849e-56	0.323155	1	0.996	5.1754e-52	E13.5-3
Gm8773	4.30191e-43	0.323078	0.611	0.211	1.20445e-38	E13.5-3
Lrrtm3	1.02039e-38	0.321762	0.596	0.212	2.8569e-34	E13.5-3
Gng3	4.68715e-27	0.321004	0.996	0.917	1.31231e-22	E13.5-3
Eef1a1	4.56847e-77	0.320545	1	1	1.27908e-72	E13.5-3
Fam63a	1.04319e-30	0.319705	0.674	0.32	2.92072e-26	E13.5-3
Rpl4	1.07299e-56	0.319458	1	1	3.00415e-52	E13.5-3
Chrna4	2.82968e-32	0.317506	0.778	0.396	7.92254e-28	E13.5-3
Nav2	2.87114e-27	0.314432	0.767	0.415	8.03863e-23	E13.5-3
Brinp2	9.74641e-49	0.314259	0.604	0.181	2.7288e-44	E13.5-3
Rpl39	6.15691e-58	0.313248	1	0.999	1.72381e-53	E13.5-3
Rpl18	1.37618e-55	0.309567	1	0.999	3.85303e-51	E13.5-3
Rps6	6.15193e-57	0.309504	1	0.999	1.72242e-52	E13.5-3
Rbp1	3.13611e-19	0.30946	0.841	0.472	8.78047e-15	E13.5-3
Cntnap2	1.98512e-22	0.30832	0.856	0.55	5.55793e-18	E13.5-3
Rps28	4.573e-50	0.305835	1	0.996	1.28035e-45	E13.5-3
Kctd13	1.46334e-29	0.304824	0.963	0.72	4.09706e-25	E13.5-3
Rpl27a	1.22445e-52	0.304475	1	0.999	3.42821e-48	E13.5-3
Eef1b2	4.10389e-38	0.303357	0.996	0.99	1.14901e-33	E13.5-3
Nnat	1.06491e-22	0.302203	1	1	2.98154e-18	E13.5-3
Reep5	2.06836e-24	0.300835	0.989	0.911	5.791e-20	E13.5-3
Prdm12	3.42614e-44	0.29937	0.719	0.239	9.59251e-40	E13.5-3
Fam131c	1.52357e-31	0.299099	0.637	0.264	4.26569e-27	E13.5-3
Cckar	6.97336e-49	0.298411	0.526	0.136	1.9524e-44	E13.5-3
Rplp1	3.30243e-45	0.29836	1	0.994	9.24615e-41	E13.5-3
Ppp1r9a	4.83659e-24	0.297098	0.811	0.493	1.35415e-19	E13.5-3
Rpl6	1.70562e-59	0.296837	1	1	4.7754e-55	E13.5-3
Myc	5.95804e-37	0.296281	0.67	0.258	1.66813e-32	E13.5-3
Doc2b	1.29736e-48	0.296189	0.541	0.146	3.63234e-44	E13.5-3
Rps24	1.34208e-55	0.296079	1	1	3.75755e-51	E13.5-3
Gpi1	1.20544e-23	0.295678	0.967	0.874	3.37498e-19	E13.5-3
Rps25	7.05005e-47	0.294834	1	0.995	1.97387e-42	E13.5-3
Pid1	3.37397e-28	0.293675	0.689	0.322	9.44643e-24	E13.5-3
Chga	8.46196e-16	0.293637	0.8	0.571	2.36918e-11	E13.5-3
Rpl13	1.7881e-57	0.293196	1	1	5.00634e-53	E13.5-3
Fau	5.15458e-57	0.292987	1	0.999	1.44318e-52	E13.5-3
Rpl36	3.41676e-48	0.292894	1	0.998	9.56625e-44	E13.5-3
Rps16	9.78516e-50	0.292154	1	0.999	2.73965e-45	E13.5-3
Tmem120a	5.88736e-22	0.28973	0.804	0.526	1.64834e-17	E13.5-3
Cox7a2l	7.55594e-26	0.289728	0.993	0.974	2.11551e-21	E13.5-3
Rpl36a	2.09963e-36	0.28936	1	0.983	5.87854e-32	E13.5-3
Rps17	3.8421e-50	0.28925	1	1	1.07571e-45	E13.5-3
Cnrip1	2.24884e-21	0.288712	0.952	0.771	6.2963e-17	E13.5-3
Pabpc1	4.11951e-29	0.288411	0.989	0.956	1.15338e-24	E13.5-3
Rpl9	4.65572e-59	0.287849	1	0.999	1.30351e-54	E13.5-3
Rps20	3.97306e-44	0.28774	1	0.994	1.11238e-39	E13.5-3
Grin3a	7.3697e-36	0.287179	0.544	0.187	2.06337e-31	E13.5-3
Rpl11	1.78959e-61	0.286388	1	1	5.01049e-57	E13.5-3
Hras	6.35822e-19	0.284691	0.97	0.887	1.78017e-14	E13.5-3
Rps27a	8.2707e-52	0.28466	1	0.999	2.31563e-47	E13.5-3
Tmsb10	1.14507e-48	0.283205	1	1	3.20597e-44	E13.5-3
Pgm2l1	4.66327e-15	0.282841	0.741	0.524	1.30562e-10	E13.5-3
Tmem65	3.8677e-25	0.282738	0.848	0.535	1.08288e-20	E13.5-3
Cacna2d2	1.47994e-27	0.282498	0.615	0.275	4.14355e-23	E13.5-3
Eif4b	7.34152e-21	0.282403	0.926	0.78	2.05548e-16	E13.5-3
Cnih3	2.49355e-49	0.282381	0.496	0.122	6.98143e-45	E13.5-3
Kidins220	8.99583e-22	0.282104	0.937	0.731	2.51865e-17	E13.5-3
Rpl8	2.21654e-46	0.279652	1	0.999	6.20588e-42	E13.5-3
Gap43	5.29148e-18	0.279641	0.993	0.975	1.48151e-13	E13.5-3
Aldoa	5.81804e-20	0.278846	0.974	0.918	1.62893e-15	E13.5-3
Zim1	1.3162e-57	0.278822	0.515	0.11	3.68509e-53	E13.5-3
Akap7	2.72348e-36	0.278154	0.637	0.242	7.62521e-32	E13.5-3
Rpl15	7.28622e-39	0.277514	0.996	0.995	2.04e-34	E13.5-3
Ucp2	7.05694e-12	0.277283	0.552	0.342	1.9758e-07	E13.5-3
Map4	5.16476e-21	0.277194	0.893	0.655	1.44603e-16	E13.5-3
Rps23	3.48078e-51	0.277139	1	1	9.74548e-47	E13.5-3
Rpl24	2.74638e-52	0.276109	1	0.999	7.68931e-48	E13.5-3
Pde10a	2.1933e-25	0.275378	0.63	0.294	6.14079e-21	E13.5-3
Nptx1	5.15382e-39	0.274995	0.515	0.161	1.44297e-34	E13.5-3
Ptprm	1.10186e-55	0.27238	0.533	0.126	3.08497e-51	E13.5-3
Rpl36al	9.21866e-27	0.272207	0.996	0.978	2.58104e-22	E13.5-3
Bach2	1.48133e-21	0.270659	0.752	0.436	4.14742e-17	E13.5-3
Fam19a5	1.69691e-23	0.270281	0.456	0.187	4.75101e-19	E13.5-3
Cend1	1.34388e-18	0.269983	0.863	0.584	3.76259e-14	E13.5-3
Gabarapl1	8.76032e-20	0.269981	0.967	0.826	2.45271e-15	E13.5-3
Khdrbs3	2.70346e-30	0.269116	0.685	0.311	7.56915e-26	E13.5-3
Nt5dc3	1.1088e-34	0.268617	0.604	0.231	3.10442e-30	E13.5-3
A730017C20Rik	1.92006e-19	0.2685	0.889	0.584	5.37577e-15	E13.5-3
Rab15	1.31921e-17	0.267231	0.53	0.277	3.69353e-13	E13.5-3
Adcy1	2.06662e-50	0.266751	0.437	0.092	5.78613e-46	E13.5-3
Rap1gap	1.97424e-30	0.265265	0.644	0.267	5.52749e-26	E13.5-3
Ret	1.38546e-45	0.264695	0.456	0.109	3.87902e-41	E13.5-3
Snhg12	1.61398e-22	0.264582	0.73	0.416	4.51881e-18	E13.5-3
Tango2	1.767e-23	0.263642	0.73	0.413	4.94725e-19	E13.5-3
Rpl23a	4.00926e-40	0.263564	0.996	0.997	1.12251e-35	E13.5-3
Ppp1r14b	5.87099e-18	0.263501	0.985	0.909	1.64376e-13	E13.5-3
Mtch1	7.83039e-29	0.263293	1	0.997	2.19235e-24	E13.5-3
Rps21	8.48541e-32	0.262888	1	0.993	2.37575e-27	E13.5-3
Rpl34	3.92004e-43	0.262761	1	0.997	1.09753e-38	E13.5-3
Rps10	6.86842e-38	0.262343	1	0.995	1.92302e-33	E13.5-3
Rell2	1.19038e-26	0.260526	0.626	0.28	3.33283e-22	E13.5-3
Rps4x	1.56902e-45	0.257274	1	0.999	4.39294e-41	E13.5-3
Cgref1	2.84292e-21	0.25717	0.733	0.414	7.95961e-17	E13.5-3
Rpl37a	2.17e-42	0.256842	1	0.999	6.07557e-38	E13.5-3
Rpl18a	3.52395e-42	0.255986	1	1	9.86636e-38	E13.5-3
Ppp2r2b	1.17718e-17	0.255596	0.744	0.477	3.29588e-13	E13.5-3
Brinp1	2.29381e-22	0.254371	0.778	0.436	6.4222e-18	E13.5-3
Arhgap21	4.07524e-24	0.254101	0.659	0.337	1.14098e-19	E13.5-3
Six6	1.06389e-26	0.253251	0.807	0.355	2.97867e-22	E13.5-3
Gng2	1.27282e-19	0.253039	0.996	0.938	3.56365e-15	E13.5-3
Calm3	6.91132e-26	0.251729	0.996	0.994	1.93503e-21	E13.5-3
Sst	4.45781e-49	2.90129	0.335	0.051	1.2481e-44	E13.5-4
Otp	5.58053e-111	2.21782	0.507	0.042	1.56244e-106	E13.5-4
Dlk1	9.81194e-73	1.96079	0.837	0.395	2.74715e-68	E13.5-4
Npy	2.47128e-52	1.49839	0.256	0.021	6.9191e-48	E13.5-4
Peg10	1.69553e-96	1.2368	0.851	0.292	4.74713e-92	E13.5-4
Cited1	3.50378e-75	1.2096	0.619	0.142	9.80989e-71	E13.5-4
Isl1	3.50998e-72	1.17584	0.912	0.405	9.82724e-68	E13.5-4
Tbx3	8.59124e-109	0.961638	0.591	0.069	2.40537e-104	E13.5-4
Calcr	2.66165e-77	0.954698	0.349	0.025	7.45208e-73	E13.5-4
Peg3	1.4624e-62	0.924345	0.944	0.766	4.09443e-58	E13.5-4
Magel2	1.78614e-48	0.910702	0.833	0.473	5.00085e-44	E13.5-4
Slc25a5	9.83519e-39	0.891984	0.981	0.948	2.75366e-34	E13.5-4
Hap1	1.01633e-59	0.852837	0.93	0.686	2.84552e-55	E13.5-4
Tox2	3.91589e-61	0.78789	0.86	0.45	1.09637e-56	E13.5-4
Nap1l5	7.30349e-38	0.741948	0.916	0.77	2.04483e-33	E13.5-4
Pomc	1.6451e-16	0.736567	1	1	4.60594e-12	E13.5-4
Tbca	5.111e-41	0.735478	0.991	0.979	1.43098e-36	E13.5-4
Meg3	4.9934e-47	0.688006	0.995	0.99	1.39805e-42	E13.5-4
Rgs4	1.22541e-43	0.658827	0.484	0.132	3.43091e-39	E13.5-4
Six6	9.89785e-38	0.652804	0.809	0.371	2.7712e-33	E13.5-4
Ecel1	1.06839e-35	0.644344	0.358	0.087	2.99129e-31	E13.5-4
Efna5	1.67518e-22	0.639121	0.74	0.548	4.69016e-18	E13.5-4
Zdbf2	3.27919e-33	0.615644	0.805	0.538	9.18107e-29	E13.5-4
Fxyd7	1.51097e-26	0.605203	0.581	0.297	4.23042e-22	E13.5-4
2900055J20Rik	1.90812e-58	0.540614	0.367	0.048	5.34234e-54	E13.5-4
Slc32a1	1.97662e-78	0.537123	0.353	0.024	5.53415e-74	E13.5-4
Ssbp2	5.09959e-34	0.520381	0.926	0.775	1.42778e-29	E13.5-4
Asb4	4.03497e-41	0.520246	0.479	0.134	1.12971e-36	E13.5-4
Zbtb20	1.21348e-19	0.510066	0.795	0.644	3.3975e-15	E13.5-4
Tshz2	1.5756e-21	0.509001	0.512	0.263	4.41138e-17	E13.5-4
Klhdc8b	8.28104e-25	0.507475	0.893	0.782	2.31853e-20	E13.5-4
Btg1	1.5983e-24	0.495962	0.865	0.734	4.47491e-20	E13.5-4
Nrxn3	3.72052e-24	0.490033	0.526	0.235	1.04167e-19	E13.5-4
Calb1	7.64027e-13	0.48997	0.419	0.211	2.13912e-08	E13.5-4
Cpa4	3.16189e-101	0.4852	0.349	0.01	8.85267e-97	E13.5-4
Wbp5	4.47107e-35	0.483493	0.995	0.98	1.25181e-30	E13.5-4
Tox	1.06281e-16	0.461842	0.586	0.392	2.97565e-12	E13.5-4
Celf6	1.46604e-17	0.460767	0.721	0.564	4.10463e-13	E13.5-4
Fam183b	1.30078e-31	0.455567	0.423	0.135	3.64192e-27	E13.5-4
Insm1	6.90317e-20	0.440251	0.54	0.275	1.93275e-15	E13.5-4
Pcdh19	6.94321e-17	0.439812	0.433	0.204	1.94396e-12	E13.5-4
Tub	2.5886e-25	0.439335	0.781	0.583	7.24756e-21	E13.5-4
Bex2	3.15882e-35	0.434778	1	0.948	8.84407e-31	E13.5-4
Nrsn2	1.11753e-24	0.431333	0.726	0.501	3.12887e-20	E13.5-4
Dbpht2	5.91776e-54	0.427218	0.358	0.052	1.65685e-49	E13.5-4
Kcne1l	1.63756e-31	0.422372	0.353	0.093	4.58485e-27	E13.5-4
Ahi1	1.36049e-21	0.417241	0.874	0.729	3.80909e-17	E13.5-4
Ppp1r9a	1.03682e-17	0.413179	0.684	0.522	2.90288e-13	E13.5-4
H3f3b	1.86269e-39	0.411123	1	1	5.21516e-35	E13.5-4
Hnrnpk	6.29632e-21	0.4051	0.995	0.998	1.76284e-16	E13.5-4
Ube2b	8.94342e-28	0.402723	0.991	0.953	2.50398e-23	E13.5-4
Celf3	1.46207e-21	0.394787	0.935	0.839	4.09349e-17	E13.5-4
Pnrc1	5.06104e-18	0.389409	0.777	0.612	1.41699e-13	E13.5-4
Dpys	6.3441e-27	0.387562	0.307	0.083	1.77622e-22	E13.5-4
Spsb4	2.38401e-12	0.370918	0.567	0.419	6.67474e-08	E13.5-4
Jam3	1.4012e-14	0.360224	0.544	0.37	3.92307e-10	E13.5-4
Pcdh17	6.85323e-11	0.360063	0.419	0.254	1.91877e-06	E13.5-4
Six3	1.87588e-16	0.358333	0.791	0.428	5.25208e-12	E13.5-4
Hmgn1	1.3003e-31	0.357397	1	0.999	3.64058e-27	E13.5-4
Atp1a1	6.40888e-15	0.355103	0.614	0.438	1.79436e-10	E13.5-4
Ngfrap1	5.19318e-30	0.35318	1	0.996	1.45399e-25	E13.5-4
Gm13889	9.19067e-44	0.350678	0.237	0.023	2.5732e-39	E13.5-4
Prox1	1.37113e-12	0.350542	0.372	0.195	3.83888e-08	E13.5-4
Cpne4	0.00194516	0.34838	0.358	0.299	1	E13.5-4
Pigp	2.2435e-14	0.346249	0.8	0.76	6.28135e-10	E13.5-4
Phip	8.08632e-15	0.344815	0.926	0.855	2.26401e-10	E13.5-4
Wdr6	1.45045e-15	0.342906	0.851	0.793	4.06098e-11	E13.5-4
Irf2bpl	7.11379e-11	0.340986	0.8	0.736	1.99172e-06	E13.5-4
Jund	7.45235e-14	0.339041	0.995	0.968	2.08651e-09	E13.5-4
Maged1	1.09011e-17	0.338908	0.991	0.984	3.0521e-13	E13.5-4
1500035N22Rik	3.56625e-29	0.338838	0.326	0.085	9.98478e-25	E13.5-4
Fam171b	2.29818e-11	0.335854	0.721	0.623	6.43444e-07	E13.5-4
Gadd45g	0.000121544	0.335038	0.353	0.264	1	E13.5-4
H1fx	1.00701e-13	0.334122	0.916	0.88	2.81942e-09	E13.5-4
Rrad	1.17756e-43	0.330239	0.312	0.047	3.29693e-39	E13.5-4
Ap3b1	6.17637e-07	0.32805	0.349	0.243	0.0172926	E13.5-4
Syt1	4.20001e-09	0.324249	0.735	0.637	0.000117592	E13.5-4
Nat14	1.78287e-18	0.323386	0.549	0.333	4.99167e-14	E13.5-4
Tro	5.37699e-11	0.320352	0.563	0.456	1.50545e-06	E13.5-4
Sdcbp	7.80416e-11	0.320168	0.847	0.818	2.18501e-06	E13.5-4
Ppp1r17	4.97641e-61	0.31676	0.307	0.027	1.39329e-56	E13.5-4
Sub1	4.11155e-25	0.315339	1	0.997	1.15115e-20	E13.5-4
Lmo1	1.27764e-08	0.312725	0.265	0.137	0.000357714	E13.5-4
Hmgn3	1.0312e-14	0.312592	0.656	0.463	2.88717e-10	E13.5-4
Lsm8	3.5377e-11	0.310615	0.749	0.703	9.90486e-07	E13.5-4
Lhx2	1.11789e-06	0.309579	0.293	0.173	0.0312988	E13.5-4
Chd4	2.07594e-12	0.308999	0.856	0.785	5.81221e-08	E13.5-4
Rps6ka6	8.28547e-08	0.307252	0.372	0.25	0.00231977	E13.5-4
Rcor2	9.16511e-07	0.304894	0.614	0.543	0.0256605	E13.5-4
Pnmal1	1.35598e-10	0.304541	0.488	0.35	3.79647e-06	E13.5-4
Tbx3os1	5.64245e-63	0.302742	0.223	0.007	1.57977e-58	E13.5-4
Hsph1	9.63241e-12	0.301733	0.563	0.41	2.69688e-07	E13.5-4
Dynll1	4.12322e-15	0.300943	0.995	0.997	1.15442e-10	E13.5-4
Mapre3	3.34245e-14	0.300653	0.772	0.675	9.35819e-10	E13.5-4
Tomm20	9.37022e-17	0.300405	0.977	0.98	2.62347e-12	E13.5-4
Camk2n1	2.00167e-06	0.299901	0.833	0.774	0.0560429	E13.5-4
Rgag4	4.64757e-11	0.29904	0.46	0.314	1.30123e-06	E13.5-4
Sh3kbp1	7.1938e-09	0.298945	0.577	0.456	0.000201412	E13.5-4
Efnb1	7.29532e-09	0.298821	0.544	0.416	0.000204254	E13.5-4
Peli1	8.44344e-12	0.297396	0.795	0.709	2.364e-07	E13.5-4
Klhdc10	2.20746e-11	0.297053	0.553	0.412	6.18045e-07	E13.5-4
Shfm1	4.61876e-18	0.295941	0.981	0.964	1.29316e-13	E13.5-4
H2afz	2.99255e-21	0.295617	1	0.997	8.37853e-17	E13.5-4
Gkap1	5.33192e-09	0.29278	0.516	0.406	0.000149283	E13.5-4
Gprasp2	2.11046e-09	0.292386	0.726	0.67	5.90886e-05	E13.5-4
Nin	2.84814e-10	0.292262	0.391	0.247	7.97423e-06	E13.5-4
Gt(ROSA)26Sor	9.16595e-11	0.289709	0.586	0.469	2.56628e-06	E13.5-4
Kcnip1	7.56844e-14	0.287565	0.391	0.197	2.11901e-09	E13.5-4
Zcchc11	1.08442e-10	0.286826	0.623	0.516	3.03615e-06	E13.5-4
Actl6a	2.97212e-13	0.284931	0.702	0.584	8.32134e-09	E13.5-4
Kdm6b	6.05984e-07	0.284913	0.679	0.61	0.0169663	E13.5-4
H2afv	7.76541e-12	0.281695	0.958	0.93	2.17416e-07	E13.5-4
Rbbp6	8.1493e-10	0.278698	0.819	0.808	2.28164e-05	E13.5-4
Chchd2	1.51793e-27	0.278363	1	0.999	4.24989e-23	E13.5-4
Efnb3	7.53566e-09	0.277639	0.767	0.75	0.000210983	E13.5-4
Tbpl1	3.73577e-13	0.277156	0.898	0.83	1.04594e-08	E13.5-4
Trp53	2.61427e-08	0.277023	0.577	0.467	0.000731944	E13.5-4
Mfng	5.32231e-12	0.27612	0.149	0.04	1.49014e-07	E13.5-4
Ptov1	5.37838e-24	0.275683	1	0.996	1.50584e-19	E13.5-4
Hmgn2	2.51536e-08	0.275287	0.902	0.919	0.000704252	E13.5-4
Tox3	5.19365e-08	0.274956	0.712	0.61	0.00145412	E13.5-4
Gck	5.90079e-13	0.274203	0.358	0.182	1.6521e-08	E13.5-4
Srsf6	2.03595e-12	0.272911	0.916	0.924	5.70025e-08	E13.5-4
Snrpg	6.36983e-18	0.268552	0.991	0.977	1.78342e-13	E13.5-4
Caly	4.39475e-08	0.267398	0.688	0.61	0.00123044	E13.5-4
Mbnl2	1.8697e-12	0.267243	0.381	0.202	5.23478e-08	E13.5-4
Cnbp	1.28171e-12	0.267068	0.981	0.951	3.58853e-08	E13.5-4
1700086L19Rik	5.08734e-34	0.266657	0.219	0.028	1.42435e-29	E13.5-4
Ntm	1.09008e-07	0.266363	0.6	0.457	0.00305201	E13.5-4
Mrfap1	1.75907e-13	0.266028	0.981	0.975	4.92504e-09	E13.5-4
Trp53bp1	6.62836e-11	0.265047	0.716	0.609	1.85581e-06	E13.5-4
Lrrn2	8.5677e-07	0.263727	0.535	0.438	0.0239879	E13.5-4
Rsrp1	2.77147e-13	0.263473	1	0.987	7.75955e-09	E13.5-4
Tagln3	4.27783e-13	0.262613	0.977	0.928	1.19771e-08	E13.5-4
Pou2f2	4.03196e-05	0.261147	0.851	0.805	1	E13.5-4
Msi1	4.52939e-09	0.260738	0.781	0.715	0.000126814	E13.5-4
Tmsb4x	4.9871e-13	0.259759	1	1	1.39629e-08	E13.5-4
6330403K07Rik	4.27526e-15	0.259501	0.995	0.984	1.19699e-10	E13.5-4
Sumo1	1.51231e-18	0.258962	0.991	0.986	4.23417e-14	E13.5-4
Pkib	1.27578e-10	0.25896	0.153	0.046	3.57193e-06	E13.5-4
Dnmt3a	3.37921e-08	0.258449	0.628	0.531	0.00094611	E13.5-4
Syt11	4.05174e-09	0.258346	0.842	0.808	0.000113441	E13.5-4
Gad1	5.66576e-46	0.258123	0.2	0.012	1.5863e-41	E13.5-4
Cnot7	6.1203e-10	0.256883	0.809	0.758	1.71356e-05	E13.5-4
Rsrc2	1.18299e-11	0.256788	0.884	0.879	3.31214e-07	E13.5-4
Rnf112	1.49541e-15	0.256673	0.321	0.13	4.18685e-11	E13.5-4
Cirbp	1.40826e-13	0.256602	0.981	0.982	3.94285e-09	E13.5-4
Lrrc58	3.46389e-06	0.25618	0.558	0.534	0.0969819	E13.5-4
Ube2i	1.14271e-09	0.255889	0.944	0.922	3.19935e-05	E13.5-4
RP24-236C17.2	3.64993e-11	0.2552	0.502	0.326	1.02191e-06	E13.5-4
Slc38a2	3.40659e-11	0.254503	0.791	0.679	9.53777e-07	E13.5-4
Cacybp	5.83918e-11	0.252708	0.944	0.918	1.63485e-06	E13.5-4
Fam216a	2.64636e-10	0.252603	0.847	0.768	7.40927e-06	E13.5-4
Rnf128	1.3593e-14	0.252543	0.205	0.061	3.80576e-10	E13.5-4
Tmem108	3.52672e-05	0.25227	0.414	0.321	0.987412	E13.5-4
Cbx3	3.64977e-05	0.251853	0.926	0.927	1	E13.5-4
Pycard	4.81865e-10	0.251708	0.409	0.247	1.34913e-05	E13.5-4
Bet1	9.76684e-12	0.251644	0.405	0.231	2.73452e-07	E13.5-4
Prox1os	1.97837e-13	0.25109	0.256	0.098	5.53903e-09	E13.5-4
Ssbp4	1.21574e-07	0.250679	0.795	0.789	0.00340384	E13.5-4
Necab2	1.86032e-108	2.09288	0.989	0.464	5.20852e-104	E13.5-5
Sncg	1.5594e-91	1.93573	0.914	0.319	4.36601e-87	E13.5-5
Nwd2	9.14568e-172	1.82894	0.973	0.152	2.56061e-167	E13.5-5
Pcp4	3.73657e-79	1.77274	0.935	0.426	1.04617e-74	E13.5-5
Lhx9	2.66401e-130	1.64993	0.989	0.276	7.45868e-126	E13.5-5
Gng8	2.13446e-155	1.59871	0.924	0.14	5.97605e-151	E13.5-5
Pou4f1	3.86554e-125	1.58484	1	0.27	1.08227e-120	E13.5-5
Tspan13	1.64087e-90	1.31408	1	0.953	4.59412e-86	E13.5-5
Tac1	2.82557e-31	1.1393	0.573	0.222	7.91104e-27	E13.5-5
Nrn1	4.33781e-94	1.07413	0.984	0.348	1.2145e-89	E13.5-5
Tesc	3.01029e-164	1.03575	0.886	0.107	8.4282e-160	E13.5-5
Nhlh2	1.12892e-64	1.01861	0.995	0.744	3.16076e-60	E13.5-5
Olfm1	3.90316e-78	0.999349	1	0.822	1.09281e-73	E13.5-5
Zic1	1.30334e-69	0.997175	0.989	0.387	3.6491e-65	E13.5-5
Vstm2b	3.58761e-83	0.988197	0.892	0.303	1.00446e-78	E13.5-5
Chst2	5.3431e-83	0.951077	0.881	0.274	1.49596e-78	E13.5-5
Tcf7l2	4.19201e-65	0.944219	1	0.706	1.17368e-60	E13.5-5
Vav3	8.44714e-105	0.897171	0.881	0.207	2.36503e-100	E13.5-5
St6galnac5	2.02543e-96	0.877819	0.768	0.16	5.67081e-92	E13.5-5
Irx2	5.66469e-72	0.863202	0.93	0.283	1.586e-67	E13.5-5
Cplx2	8.07726e-75	0.847506	0.957	0.43	2.26147e-70	E13.5-5
Mmd2	6.8574e-92	0.842112	0.881	0.235	1.91993e-87	E13.5-5
Msi2	2.40495e-63	0.816431	0.962	0.598	6.73337e-59	E13.5-5
Cbln2	1.05827e-51	0.811837	0.957	0.457	2.96294e-47	E13.5-5
Ebf1	4.16056e-62	0.809415	0.978	0.358	1.16487e-57	E13.5-5
Syt6	3.85025e-122	0.80432	0.676	0.073	1.07799e-117	E13.5-5
Tppp3	4.00238e-52	0.775189	0.941	0.537	1.12059e-47	E13.5-5
Thsd7a	2.57099e-75	0.769724	0.865	0.287	7.19827e-71	E13.5-5
Kctd8	8.00579e-83	0.768479	0.757	0.181	2.24146e-78	E13.5-5
1810041L15Rik	6.33516e-82	0.765454	0.865	0.24	1.77372e-77	E13.5-5
Zic4	5.34212e-65	0.751346	0.832	0.258	1.49569e-60	E13.5-5
Pou6f2	4.03947e-72	0.741403	0.859	0.253	1.13097e-67	E13.5-5
Mab21l2	1.21816e-68	0.741258	0.73	0.174	3.41061e-64	E13.5-5
Irx1	9.29698e-63	0.722841	0.822	0.242	2.60297e-58	E13.5-5
D930028M14Rik	3.27663e-34	0.718615	0.832	0.413	9.17391e-30	E13.5-5
Nr4a2	2.84261e-50	0.705788	0.968	0.428	7.95873e-46	E13.5-5
Cadm1	4.72224e-53	0.690348	0.946	0.479	1.32213e-48	E13.5-5
Gabbr1	1.79268e-43	0.677915	0.995	0.852	5.01915e-39	E13.5-5
Cxxc5	1.25995e-55	0.668355	0.957	0.463	3.52762e-51	E13.5-5
Cacnb3	7.07871e-53	0.665967	1	0.882	1.9819e-48	E13.5-5
Islr2	1.02634e-40	0.656222	0.989	0.719	2.87355e-36	E13.5-5
Nefl	2.08265e-34	0.65371	0.924	0.574	5.83101e-30	E13.5-5
Pcsk2	7.45635e-53	0.650298	0.87	0.335	2.08763e-48	E13.5-5
Parvb	1.34583e-54	0.64577	0.795	0.286	3.76805e-50	E13.5-5
Trp53i11	1.09981e-22	0.632087	0.951	0.866	3.07925e-18	E13.5-5
Nrxn1	1.20943e-23	0.61428	0.941	0.775	3.38615e-19	E13.5-5
Syt13	1.96816e-41	0.606275	0.8	0.382	5.51046e-37	E13.5-5
Homer2	9.95668e-52	0.604398	0.73	0.267	2.78767e-47	E13.5-5
Wif1	5.66356e-43	0.572289	0.47	0.107	1.58568e-38	E13.5-5
Rap1b	2.08605e-40	0.560714	0.957	0.799	5.84053e-36	E13.5-5
Ddah2	2.0351e-44	0.534267	1	0.958	5.69787e-40	E13.5-5
Cartpt	1.05226e-70	0.521964	0.297	0.015	2.94611e-66	E13.5-5
Dusp26	1.95902e-24	0.493949	0.93	0.701	5.48486e-20	E13.5-5
Map7d2	1.12746e-38	0.493721	0.8	0.391	3.15666e-34	E13.5-5
Atp1b1	3.8384e-27	0.490975	0.951	0.686	1.07468e-22	E13.5-5
Nefm	7.04028e-28	0.490674	0.832	0.455	1.97114e-23	E13.5-5
Plpp4	2.61337e-68	0.484259	0.405	0.042	7.31691e-64	E13.5-5
Ctnnd2	2.76591e-34	0.479526	0.849	0.504	7.744e-30	E13.5-5
Tmem163	6.83378e-36	0.47916	0.903	0.439	1.91332e-31	E13.5-5
Ina	3.01979e-40	0.47745	1	0.948	8.4548e-36	E13.5-5
Kif21a	2.35672e-29	0.472824	0.903	0.661	6.59833e-25	E13.5-5
Ube2e3	2.90442e-43	0.463157	1	0.984	8.13179e-39	E13.5-5
Nrp1	4.90718e-32	0.46228	0.616	0.235	1.37391e-27	E13.5-5
Onecut2	1.0544e-22	0.45892	0.735	0.407	2.95211e-18	E13.5-5
Ctnnb1	1.20553e-27	0.44896	0.989	0.857	3.37525e-23	E13.5-5
Plk2	3.69228e-18	0.440414	0.703	0.417	1.03377e-13	E13.5-5
Epha8	5.36787e-62	0.438925	0.6	0.128	1.5029e-57	E13.5-5
Cdk14	2.02053e-35	0.436083	0.697	0.299	5.65707e-31	E13.5-5
Cnih2	5.77964e-35	0.429344	0.995	0.953	1.61818e-30	E13.5-5
Nrg1	2.40035e-44	0.428932	0.643	0.215	6.7205e-40	E13.5-5
Rundc3a	6.77315e-34	0.424568	0.995	0.873	1.89635e-29	E13.5-5
Pkig	5.21902e-26	0.424161	0.892	0.574	1.46122e-21	E13.5-5
Tmem2	3.05636e-28	0.414943	0.795	0.424	8.55721e-24	E13.5-5
Robo3	6.39182e-42	0.414297	0.281	0.035	1.78958e-37	E13.5-5
R3hdm4	2.83644e-25	0.41413	0.978	0.857	7.94147e-21	E13.5-5
Susd4	3.67117e-24	0.409354	0.649	0.336	1.02785e-19	E13.5-5
Apba2	1.69584e-21	0.407676	0.924	0.677	4.748e-17	E13.5-5
Ccdc109b	2.14575e-42	0.407462	0.465	0.106	6.00767e-38	E13.5-5
Aifm3	8.00446e-54	0.407065	0.584	0.134	2.24109e-49	E13.5-5
Sulf2	2.0861e-12	0.405706	0.546	0.349	5.84067e-08	E13.5-5
Gareml	1.07046e-56	0.403707	0.557	0.114	2.99708e-52	E13.5-5
Dok5	3.06375e-30	0.40117	0.454	0.14	8.5779e-26	E13.5-5
Stmn4	1.71309e-22	0.400748	0.995	0.906	4.79631e-18	E13.5-5
Arl6	8.63369e-30	0.399853	0.719	0.349	2.41726e-25	E13.5-5
Celf4	4.92382e-22	0.397709	0.973	0.878	1.37857e-17	E13.5-5
Negr1	1.41611e-18	0.396822	0.784	0.5	3.96482e-14	E13.5-5
Lef1	5.41345e-34	0.396774	0.6	0.216	1.51566e-29	E13.5-5
Rtn4rl1	5.80034e-54	0.394345	0.589	0.137	1.62398e-49	E13.5-5
Robo1	1.49655e-27	0.390757	0.784	0.435	4.19005e-23	E13.5-5
Clstn1	3.67243e-18	0.389527	0.903	0.727	1.02821e-13	E13.5-5
Gng3	7.8456e-26	0.388591	1	0.921	2.19661e-21	E13.5-5
Cables1	1.76735e-35	0.386414	0.584	0.207	4.94823e-31	E13.5-5
Snhg11	5.97715e-11	0.386359	0.914	0.718	1.67348e-06	E13.5-5
Cotl1	1.15691e-26	0.382075	0.989	0.895	3.23912e-22	E13.5-5
Ctnnbip1	6.47774e-18	0.380806	0.935	0.838	1.81364e-13	E13.5-5
Ptprr	5.19675e-29	0.379522	0.486	0.154	1.45498e-24	E13.5-5
2510009E07Rik	1.94298e-24	0.377881	0.573	0.266	5.43996e-20	E13.5-5
Chrna3	1.1306e-44	0.376614	0.551	0.146	3.16546e-40	E13.5-5
Ndnl2	2.39701e-13	0.376598	0.741	0.583	6.71116e-09	E13.5-5
Cntn5	1.60357e-48	0.376481	0.514	0.11	4.48968e-44	E13.5-5
Cpne4	7.91848e-33	0.373724	0.686	0.262	2.21702e-28	E13.5-5
Asic1	8.38293e-30	0.371754	0.692	0.311	2.34705e-25	E13.5-5
Resp18	1.79934e-15	0.371595	0.897	0.714	5.03779e-11	E13.5-5
Tmem132a	2.3958e-17	0.370577	0.886	0.695	6.70777e-13	E13.5-5
Hsdl1	9.77402e-18	0.368435	0.849	0.672	2.73653e-13	E13.5-5
Osbpl3	4.74077e-70	0.365852	0.465	0.058	1.32732e-65	E13.5-5
Gpm6b	2.00822e-20	0.359297	0.876	0.677	5.6226e-16	E13.5-5
Eml5	2.52584e-31	0.35818	0.67	0.277	7.07184e-27	E13.5-5
Galnt16	2.47009e-34	0.35237	0.578	0.198	6.91575e-30	E13.5-5
Cntn2	9.09556e-29	0.351325	0.351	0.083	2.54657e-24	E13.5-5
Ap3s1	4.52036e-23	0.350371	0.973	0.9	1.26561e-18	E13.5-5
Fam78b	7.44112e-20	0.349176	0.686	0.419	2.08336e-15	E13.5-5
Bzw2	2.17252e-17	0.348822	0.968	0.893	6.08262e-13	E13.5-5
Elavl4	1.81542e-22	0.348589	1	0.913	5.08282e-18	E13.5-5
A930011G23Rik	1.00301e-31	0.346918	0.508	0.161	2.80823e-27	E13.5-5
Vav2	3.14547e-29	0.346324	0.557	0.212	8.80669e-25	E13.5-5
Rab3b	3.61565e-16	0.345784	0.735	0.481	1.01231e-11	E13.5-5
Nrsn1	1.70888e-08	0.345679	0.584	0.442	0.000478452	E13.5-5
RP24-402O2.2	3.63133e-69	0.345614	0.297	0.016	1.0167e-64	E13.5-5
Plxnc1	5.03568e-17	0.342365	0.557	0.304	1.40989e-12	E13.5-5
Plppr1	4.8333e-22	0.337277	0.805	0.448	1.35323e-17	E13.5-5
Chst8	3.0887e-18	0.337158	0.681	0.392	8.64775e-14	E13.5-5
Bmp7	3.58839e-29	0.336198	0.714	0.283	1.00468e-24	E13.5-5
Pam	2.0821e-16	0.334345	0.627	0.351	5.82946e-12	E13.5-5
Cntfr	6.93705e-17	0.334214	0.795	0.545	1.94223e-12	E13.5-5
Sstr2	1.24153e-53	0.333916	0.297	0.027	3.47602e-49	E13.5-5
Srrm3	9.5489e-19	0.328782	0.757	0.49	2.6735e-14	E13.5-5
Clybl	3.93576e-34	0.328038	0.373	0.083	1.10193e-29	E13.5-5
Cacng4	1.39637e-16	0.32283	0.832	0.629	3.90955e-12	E13.5-5
Map1lc3a	4.30782e-23	0.322321	1	0.977	1.2061e-18	E13.5-5
Lbh	2.03078e-14	0.322213	0.876	0.719	5.68579e-10	E13.5-5
Pcsk1n	3.08073e-07	0.317761	1	0.947	0.00862542	E13.5-5
Prnp	3.38633e-17	0.317583	0.854	0.637	9.48104e-13	E13.5-5
Car10	5.45053e-17	0.317272	0.405	0.165	1.52604e-12	E13.5-5
Rasgrp2	6.6141e-28	0.316101	0.481	0.165	1.85182e-23	E13.5-5
Vat1	2.17396e-18	0.315625	0.968	0.803	6.08665e-14	E13.5-5
Cited2	7.78062e-15	0.31503	0.859	0.646	2.17842e-10	E13.5-5
Cpne5	2.27905e-27	0.314968	0.584	0.224	6.3809e-23	E13.5-5
Tmeff2	8.43715e-07	0.314276	0.741	0.559	0.0236223	E13.5-5
Nek7	6.96574e-36	0.313974	0.411	0.097	1.95027e-31	E13.5-5
Lmo3	3.38015e-14	0.313299	0.811	0.552	9.46373e-10	E13.5-5
Cystm1	3.87549e-16	0.312598	0.616	0.376	1.08506e-11	E13.5-5
Ckb	2.07882e-14	0.3124	0.984	0.952	5.82029e-10	E13.5-5
Insm1	2.46511e-22	0.308989	0.638	0.268	6.9018e-18	E13.5-5
Rbms3	3.06988e-13	0.308062	0.465	0.252	8.59505e-09	E13.5-5
Mdga1	8.20366e-24	0.307701	0.476	0.173	2.29686e-19	E13.5-5
Dach1	5.54601e-20	0.30418	0.611	0.299	1.55277e-15	E13.5-5
Pag1	1.72875e-37	0.304104	0.416	0.094	4.84017e-33	E13.5-5
Kcnd3	1.01566e-25	0.303436	0.535	0.213	2.84363e-21	E13.5-5
Cttnbp2	6.0961e-18	0.300277	0.708	0.423	1.70679e-13	E13.5-5
Snx10	9.05995e-16	0.298271	0.789	0.541	2.53661e-11	E13.5-5
Zfand5	1.5574e-14	0.297439	0.978	0.934	4.36041e-10	E13.5-5
Clic1	8.22691e-13	0.296263	0.778	0.496	2.30337e-08	E13.5-5
Shisa4	2.07022e-16	0.29491	0.768	0.521	5.79621e-12	E13.5-5
Tmem130	2.05006e-16	0.294121	0.849	0.592	5.73976e-12	E13.5-5
Fat3	2.36553e-24	0.293092	0.541	0.207	6.62301e-20	E13.5-5
Scoc	2.54559e-17	0.29235	0.919	0.765	7.12715e-13	E13.5-5
Gfra1	2.27254e-24	0.291364	0.514	0.195	6.36265e-20	E13.5-5
Gap43	2.30592e-13	0.285706	1	0.975	6.4561e-09	E13.5-5
Ncald	1.05146e-12	0.284149	0.665	0.441	2.94386e-08	E13.5-5
Ttc9b	1.47757e-13	0.282869	0.951	0.752	4.1369e-09	E13.5-5
Gpr85	2.91445e-15	0.282464	0.854	0.625	8.15987e-11	E13.5-5
Spock1	1.74886e-20	0.28177	0.595	0.268	4.89647e-16	E13.5-5
Cntnap4	3.38887e-35	0.280803	0.335	0.063	9.48816e-31	E13.5-5
Ift22	7.0561e-14	0.279884	0.703	0.443	1.97557e-09	E13.5-5
Sdcbp	2.42955e-16	0.279503	0.935	0.808	6.80226e-12	E13.5-5
Kcnma1	1.23889e-32	0.278028	0.465	0.133	3.46864e-28	E13.5-5
Tprgl	4.48904e-16	0.277787	0.941	0.844	1.25684e-11	E13.5-5
Lrrn1	3.87817e-24	0.277745	0.584	0.236	1.08581e-19	E13.5-5
Bnip3l	4.58309e-15	0.276042	0.946	0.881	1.28317e-10	E13.5-5
Tmem30a	1.13315e-13	0.275777	0.87	0.728	3.1726e-09	E13.5-5
2310009B15Rik	8.4791e-18	0.275384	0.735	0.436	2.37398e-13	E13.5-5
Epb41l3	2.82105e-15	0.273528	0.665	0.412	7.89837e-11	E13.5-5
Mgat4c	9.8857e-27	0.27193	0.454	0.137	2.7678e-22	E13.5-5
Elfn1	4.1205e-41	0.271806	0.314	0.044	1.15366e-36	E13.5-5
Klc1	2.92646e-16	0.271637	0.995	0.959	8.19349e-12	E13.5-5
Col25a1	1.53093e-25	0.271023	0.297	0.069	4.28631e-21	E13.5-5
Spock2	1.86801e-15	0.270834	0.632	0.367	5.23005e-11	E13.5-5
Atp1a1	2.50337e-11	0.269826	0.654	0.437	7.00893e-07	E13.5-5
Kif26a	1.37898e-13	0.268449	0.611	0.354	3.86086e-09	E13.5-5
Gm1673	8.57969e-20	0.267113	1	0.988	2.40214e-15	E13.5-5
Rgmb	4.11508e-13	0.265464	0.578	0.331	1.15214e-08	E13.5-5
Nsg2	1.84886e-14	0.264933	0.989	0.903	5.17645e-10	E13.5-5
Ctxn1	2.02207e-15	0.264424	0.995	0.904	5.66139e-11	E13.5-5
Crip2	5.04854e-14	0.264371	0.995	0.89	1.41349e-09	E13.5-5
Prkcq	1.60217e-58	0.264067	0.232	0.01	4.48576e-54	E13.5-5
Tmem178	5.9089e-25	0.263048	0.465	0.155	1.65437e-20	E13.5-5
Mpzl1	1.01352e-09	0.262068	0.827	0.716	2.83765e-05	E13.5-5
Tnfrsf19	2.03603e-25	0.260509	0.595	0.216	5.70049e-21	E13.5-5
Ly6h	3.02623e-14	0.258903	1	0.931	8.47285e-10	E13.5-5
Gnao1	9.85095e-12	0.258554	0.978	0.827	2.75807e-07	E13.5-5
Cdh8	1.43666e-18	0.258398	0.465	0.185	4.02237e-14	E13.5-5
Cldnd1	1.77008e-11	0.257744	0.811	0.628	4.95586e-07	E13.5-5
Napb	7.59625e-12	0.255342	0.659	0.443	2.1268e-07	E13.5-5
Scn2a1	2.06362e-16	0.254663	0.616	0.35	5.77773e-12	E13.5-5
Klhl1	1.7572e-20	0.254218	0.362	0.113	4.91981e-16	E13.5-5
Cisd1	1.91243e-16	0.253607	0.962	0.836	5.35441e-12	E13.5-5
Tsc22d3	1.86829e-13	0.253317	0.87	0.657	5.23083e-09	E13.5-5
Celf6	2.22303e-15	0.253281	0.827	0.555	6.22404e-11	E13.5-5
Camk2n1	8.41609e-11	0.253273	0.903	0.767	2.35634e-06	E13.5-5
Arl4c	1.9508e-12	0.252373	0.957	0.77	5.46186e-08	E13.5-5
Ank2	7.91329e-13	0.252305	0.968	0.833	2.21556e-08	E13.5-5
Gabarap	3.541e-20	0.252194	1	0.994	9.91409e-16	E13.5-5
Ablim1	2.04533e-10	0.251743	0.514	0.326	5.72652e-06	E13.5-5
Iglon5	5.96381e-15	0.250231	0.692	0.424	1.66975e-10	E13.5-5
Col3a1	1.0571e-166	3.70067	1	0.176	2.95967e-162	E13.5-6
Vtn	5.76966e-207	3.50455	0.994	0.106	1.61539e-202	E13.5-6
Lgals1	2.33403e-196	3.39568	0.994	0.119	6.53481e-192	E13.5-6
Col1a2	1.90804e-211	3.12307	0.994	0.1	5.34214e-207	E13.5-6
Sparc	1.26215e-242	2.98667	1	0.072	3.53376e-238	E13.5-6
Cxcl12	2.43196e-228	2.89164	0.994	0.082	6.809e-224	E13.5-6
Col1a1	5.41388e-245	2.89052	0.994	0.068	1.51578e-240	E13.5-6
Serpinh1	1.25442e-126	2.8796	1	0.322	3.51211e-122	E13.5-6
Dcn	3.10179e-242	2.87551	0.994	0.07	8.6844e-238	E13.5-6
Pltp	7.28591e-254	2.68778	0.988	0.059	2.03991e-249	E13.5-6
H19	2.20718e-163	2.66446	0.851	0.089	6.17966e-159	E13.5-6
Igfbp2	1.00704e-103	2.56941	1	0.534	2.81951e-99	E13.5-6
Bgn	6.6838e-268	2.5284	0.988	0.049	1.87133e-263	E13.5-6
Col4a1	2.4933e-213	2.52782	0.988	0.094	6.98075e-209	E13.5-6
Lum	5.31166e-269	2.36392	0.994	0.05	1.48716e-264	E13.5-6
Sparcl1	2.08505e-226	2.36299	0.988	0.081	5.83773e-222	E13.5-6
Igfbp4	7.99445e-134	2.34571	0.994	0.271	2.23829e-129	E13.5-6
S100a6	1.31679e-278	2.26442	0.857	0.017	3.68674e-274	E13.5-6
Anxa2	5.51064e-237	2.21858	1	0.076	1.54287e-232	E13.5-6
Col4a2	1.88766e-205	2.15833	0.988	0.103	5.28506e-201	E13.5-6
Fbln1	6.15346e-224	2.14784	0.932	0.064	1.72285e-219	E13.5-6
Atp1a2	2.87184e-289	2.09698	1	0.04	8.04057e-285	E13.5-6
Cthrc1	1.04421e-239	2.09386	0.994	0.071	2.92359e-235	E13.5-6
Mdk	1.11785e-172	2.03666	1	0.152	3.12975e-168	E13.5-6
Gja1	1.67391e-273	2.02423	0.988	0.045	4.68661e-269	E13.5-6
Colec12	1.60267e-256	1.96106	0.988	0.057	4.48715e-252	E13.5-6
S100a11	2.19844e-136	1.86459	1	0.25	6.1552e-132	E13.5-6
Islr	2.8003e-284	1.85109	0.981	0.038	7.84029e-280	E13.5-6
Ifitm2	7.21075e-182	1.83786	0.994	0.14	2.01887e-177	E13.5-6
Phlda1	1.57412e-111	1.8302	0.969	0.319	4.40722e-107	E13.5-6
Serpinf1	2.76397e-302	1.82044	0.975	0.028	7.73858e-298	E13.5-6
Mfap2	7.69198e-91	1.80633	0.994	0.585	2.1536e-86	E13.5-6
Gpc3	3.04364e-219	1.80499	0.981	0.084	8.52158e-215	E13.5-6
Rcn3	9.4726e-198	1.8029	0.975	0.106	2.65214e-193	E13.5-6
Apod	0	1.80017	0.969	0.017	0	E13.5-6
Slc1a3	7.62279e-306	1.78639	0.994	0.029	2.13423e-301	E13.5-6
Slc6a13	1.22843e-280	1.76853	0.975	0.038	3.43935e-276	E13.5-6
Mfap4	4.42497e-213	1.74623	0.925	0.066	1.2389e-208	E13.5-6
Ramp2	2.65814e-236	1.74069	0.963	0.062	7.44227e-232	E13.5-6
Nbl1	1.85452e-248	1.73949	0.907	0.039	5.19229e-244	E13.5-6
Ptn	1.06916e-81	1.72857	1	0.635	2.99344e-77	E13.5-6
Col26a1	9.54641e-263	1.72626	0.988	0.052	2.6728e-258	E13.5-6
Igf2	3.45897e-281	1.72024	0.963	0.034	9.68444e-277	E13.5-6
Sepp1	4.63741e-235	1.71982	0.975	0.065	1.29838e-230	E13.5-6
Cldn11	4.72744e-226	1.71718	0.814	0.032	1.32359e-221	E13.5-6
Laptm4a	1.99472e-94	1.71005	1	0.893	5.58481e-90	E13.5-6
Mest	2.55411e-93	1.68964	0.975	0.486	7.151e-89	E13.5-6
Col18a1	3.92752e-241	1.68707	0.913	0.046	1.09963e-236	E13.5-6
Id3	3.27769e-174	1.6692	0.969	0.13	9.17687e-170	E13.5-6
Cd63	9.79392e-99	1.66584	0.988	0.494	2.7421e-94	E13.5-6
Hes1	1.36029e-253	1.65697	0.957	0.049	3.80853e-249	E13.5-6
Emp3	0	1.62832	0.975	0.021	0	E13.5-6
Nkd1	3.2635e-141	1.60195	0.981	0.201	9.13714e-137	E13.5-6
Nid2	9.78003e-299	1.59024	0.938	0.021	2.73821e-294	E13.5-6
Ppic	0	1.57893	0.963	0.022	0	E13.5-6
Anxa5	1.9763e-171	1.55683	0.988	0.15	5.53325e-167	E13.5-6
Slc22a6	2.13036e-292	1.54942	0.894	0.017	5.96457e-288	E13.5-6
Zfp36l1	8.04293e-301	1.5321	0.994	0.031	2.25186e-296	E13.5-6
Fbn2	7.71128e-248	1.47789	0.975	0.056	2.159e-243	E13.5-6
Col6a1	5.208e-286	1.47635	0.981	0.036	1.45814e-281	E13.5-6
Tbx18	0	1.47344	0.963	0.015	0	E13.5-6
Col6a2	4.49809e-276	1.43939	0.969	0.039	1.25937e-271	E13.5-6
Anxa6	9.12695e-217	1.437	0.975	0.084	2.55536e-212	E13.5-6
Wls	2.67711e-210	1.42538	0.981	0.09	7.49537e-206	E13.5-6
Fstl1	5.54436e-154	1.42494	1	0.193	1.55231e-149	E13.5-6
Jun	2.84611e-85	1.40804	0.932	0.342	7.96855e-81	E13.5-6
Cdkn1c	3.26647e-34	1.40643	0.988	0.9	9.14547e-30	E13.5-6
Itih5	1.12647e-301	1.39645	0.894	0.013	3.15388e-297	E13.5-6
Tpbg	6.22896e-145	1.39627	0.901	0.135	1.74398e-140	E13.5-6
Rdh10	1.5388e-217	1.39142	0.944	0.069	4.30833e-213	E13.5-6
Gpx8	0	1.38655	0.963	0.012	0	E13.5-6
Col5a2	3.81351e-285	1.37466	0.969	0.034	1.06771e-280	E13.5-6
Bmp7	6.46669e-119	1.36699	0.981	0.263	1.81054e-114	E13.5-6
Vim	7.90196e-83	1.35776	1	0.758	2.21239e-78	E13.5-6
Eva1b	0	1.3524	0.913	0.013	0	E13.5-6
Osr1	2.9776e-300	1.35233	0.876	0.011	8.3367e-296	E13.5-6
Flrt2	2.03872e-155	1.35207	0.969	0.163	5.708e-151	E13.5-6
Mmp2	1.2141e-246	1.34141	0.95	0.05	3.39922e-242	E13.5-6
1810058I24Rik	1.2384e-87	1.33761	0.994	0.789	3.46728e-83	E13.5-6
Hmgb2	3.56679e-37	1.33193	0.77	0.363	9.98629e-33	E13.5-6
Cnn2	1.44547e-282	1.3273	0.888	0.02	4.04702e-278	E13.5-6
Plat	7.89272e-187	1.30335	0.957	0.105	2.2098e-182	E13.5-6
Epha7	4.89231e-124	1.28657	0.969	0.228	1.36975e-119	E13.5-6
Gpx7	5.42906e-126	1.2806	0.901	0.176	1.52003e-121	E13.5-6
Vamp5	2.34466e-255	1.2768	0.77	0.012	6.56457e-251	E13.5-6
Cd81	4.31161e-88	1.27472	1	0.867	1.20717e-83	E13.5-6
Itm2b	3.43823e-86	1.26292	1	0.817	9.62635e-82	E13.5-6
Arhgap29	4.46868e-305	1.25347	0.95	0.021	1.25114e-300	E13.5-6
Myl12a	8.06139e-112	1.24743	0.994	0.343	2.25703e-107	E13.5-6
Dab2	2.78055e-269	1.24028	0.882	0.023	7.78499e-265	E13.5-6
Timp3	1.56685e-274	1.22365	0.888	0.023	4.38686e-270	E13.5-6
Lamb1	0	1.21875	0.925	0.015	0	E13.5-6
Nid1	3.16055e-287	1.21873	0.919	0.023	8.84891e-283	E13.5-6
Prdx4	5.50975e-79	1.20568	0.919	0.407	1.54262e-74	E13.5-6
Angptl4	4.18706e-307	1.20143	0.944	0.019	1.17229e-302	E13.5-6
Tpm4	9.02815e-85	1.19949	0.981	0.565	2.5277e-80	E13.5-6
Tpst1	4.10882e-114	1.19857	0.944	0.259	1.15039e-109	E13.5-6
Rbp1	4.36993e-72	1.19526	0.994	0.482	1.22349e-67	E13.5-6
Rcn1	5.5763e-125	1.18433	0.969	0.24	1.56125e-120	E13.5-6
Oaf	0	1.17963	0.913	0.011	0	E13.5-6
Apoe	1.31351e-188	1.17846	0.913	0.085	3.67756e-184	E13.5-6
Svil	2.9029e-234	1.16884	0.882	0.042	8.12754e-230	E13.5-6
Rhoc	1.21109e-181	1.16756	0.944	0.105	3.3908e-177	E13.5-6
Add3	3.59024e-261	1.1673	0.938	0.039	1.00519e-256	E13.5-6
Emp1	2.73565e-273	1.16611	0.845	0.017	7.65927e-269	E13.5-6
Lrrc17	3.20707e-265	1.15152	0.807	0.013	8.97916e-261	E13.5-6
Cmtm3	7.13628e-236	1.14987	0.932	0.051	1.99802e-231	E13.5-6
Col23a1	2.05751e-291	1.14715	0.925	0.022	5.76063e-287	E13.5-6
Ngfr	8.81077e-193	1.14459	0.783	0.042	2.46684e-188	E13.5-6
Tril	2.91295e-158	1.14272	0.913	0.118	8.15568e-154	E13.5-6
Tgm2	8.01619e-292	1.14263	0.857	0.012	2.24437e-287	E13.5-6
Txndc5	1.31892e-98	1.13394	0.981	0.389	3.69272e-94	E13.5-6
Hadh	1.89978e-210	1.1324	0.95	0.078	5.31899e-206	E13.5-6
Pcolce	3.01651e-191	1.13121	0.714	0.029	8.44563e-187	E13.5-6
Efemp2	3.86788e-212	1.13073	0.925	0.068	1.08293e-207	E13.5-6
Ppib	2.82017e-73	1.1223	1	0.868	7.89591e-69	E13.5-6
Tcf4	3.8934e-97	1.11689	0.988	0.382	1.09007e-92	E13.5-6
Vamp8	2.20819e-259	1.11125	0.845	0.021	6.18249e-255	E13.5-6
Selm	1.11285e-119	1.11065	0.876	0.17	3.11576e-115	E13.5-6
Zic1	7.65821e-74	1.10112	1	0.394	2.14414e-69	E13.5-6
Tfpi	1.52555e-256	1.09781	0.901	0.033	4.27123e-252	E13.5-6
Akap12	3.98144e-82	1.09663	0.957	0.404	1.11472e-77	E13.5-6
Lpar1	2.13293e-122	1.09657	0.938	0.203	5.97179e-118	E13.5-6
Plpp3	1.00167e-149	1.08211	0.907	0.123	2.80447e-145	E13.5-6
Fkbp10	3.49472e-297	1.0821	0.888	0.014	9.78452e-293	E13.5-6
Fcgrt	2.11645e-305	1.08127	0.901	0.012	5.92565e-301	E13.5-6
Aebp1	1.36523e-256	1.08056	0.77	0.011	3.82237e-252	E13.5-6
Fos	3.30033e-95	1.07697	0.807	0.161	9.24026e-91	E13.5-6
Copz2	1.54777e-303	1.07609	0.907	0.015	4.33345e-299	E13.5-6
Hmgn3	9.59133e-81	1.07412	0.969	0.439	2.68538e-76	E13.5-6
Slc9a3r1	5.60445e-197	1.07091	0.876	0.063	1.56913e-192	E13.5-6
Ifitm1	5.0526e-212	1.06688	0.658	0.011	1.41463e-207	E13.5-6
Tmem132c	8.73143e-206	1.06593	0.826	0.045	2.44462e-201	E13.5-6
Nap1l1	2.25512e-88	1.06524	1	0.931	6.31389e-84	E13.5-6
Stra6	3.88467e-225	1.06098	0.832	0.035	1.08763e-220	E13.5-6
Cald1	6.30712e-155	1.03882	0.919	0.12	1.76587e-150	E13.5-6
Rrbp1	1.85623e-116	1.03506	0.957	0.237	5.19709e-112	E13.5-6
Tubb6	5.35701e-208	1.02568	0.634	0.009	1.49986e-203	E13.5-6
Lamc3	1.58139e-293	1.02435	0.87	0.013	4.42758e-289	E13.5-6
Cd248	1.45156e-301	1.01849	0.888	0.012	4.06407e-297	E13.5-6
Grb10	1.78425e-71	1.01512	0.975	0.463	4.99554e-67	E13.5-6
Itm2a	2.55231e-231	1.01407	0.857	0.037	7.14595e-227	E13.5-6
Lmo4	1.04011e-92	1.00742	0.913	0.252	2.91211e-88	E13.5-6
Ptk7	5.64037e-140	1.00088	0.944	0.166	1.57919e-135	E13.5-6
Tgfb1i1	4.96071e-124	0.99402	0.901	0.165	1.3889e-119	E13.5-6
Wdr86	8.18328e-278	0.993023	0.832	0.012	2.29115e-273	E13.5-6
Ccnd3	1.0975e-122	0.985564	0.907	0.169	3.07279e-118	E13.5-6
Gjb6	1.16931e-168	0.981671	0.559	0.013	3.27383e-164	E13.5-6
2810417H13Rik	2.24647e-78	0.980475	0.323	0.015	6.28967e-74	E13.5-6
Arl4a	6.108e-72	0.979246	1	0.702	1.71012e-67	E13.5-6
Pdlim2	2.02201e-242	0.973062	0.82	0.024	5.66121e-238	E13.5-6
Emilin1	1.25801e-240	0.971681	0.789	0.02	3.52218e-236	E13.5-6
Ube2c	1.42398e-52	0.969366	0.286	0.023	3.98687e-48	E13.5-6
Ier3	6.01618e-175	0.968067	0.776	0.05	1.68441e-170	E13.5-6
Prss23	2.45509e-194	0.964394	0.665	0.018	6.87376e-190	E13.5-6
Grn	2.05739e-138	0.96067	0.919	0.154	5.76029e-134	E13.5-6
Rsu1	1.6202e-136	0.958511	0.907	0.15	4.53625e-132	E13.5-6
Cfh	8.25892e-213	0.957222	0.727	0.021	2.31233e-208	E13.5-6
Nkain4	3.18079e-97	0.939513	0.87	0.205	8.90558e-93	E13.5-6
Itm2c	7.53901e-73	0.938148	1	0.728	2.11077e-68	E13.5-6
P3h3	6.97519e-128	0.93332	0.882	0.145	1.95291e-123	E13.5-6
Bicc1	4.11538e-220	0.929958	0.795	0.029	1.15222e-215	E13.5-6
Gsn	2.54867e-93	0.928533	0.839	0.202	7.13578e-89	E13.5-6
Cyba	1.27134e-224	0.927726	0.801	0.028	3.55951e-220	E13.5-6
Fam174b	1.34863e-96	0.923648	0.901	0.25	3.7759e-92	E13.5-6
Col5a1	2.99272e-273	0.921735	0.826	0.013	8.37903e-269	E13.5-6
Nupr1	3.15898e-271	0.919503	0.752	0.004	8.84451e-267	E13.5-6
Slc41a1	8.49229e-199	0.914216	0.851	0.056	2.37767e-194	E13.5-6
Ctsz	7.41854e-86	0.909672	0.913	0.296	2.07704e-81	E13.5-6
Rbms1	9.40887e-83	0.906955	0.932	0.33	2.6343e-78	E13.5-6
Slc6a20a	4.01043e-253	0.90564	0.733	0.007	1.12284e-248	E13.5-6
Lhfp	2.77031e-170	0.898803	0.87	0.08	7.7563e-166	E13.5-6
Foxc1	2.74185e-302	0.898061	0.882	0.011	7.67664e-298	E13.5-6
Tmem100	2.82708e-182	0.892614	0.696	0.03	7.91525e-178	E13.5-6
Tpm1	4.59059e-60	0.8917	0.963	0.556	1.28527e-55	E13.5-6
Tpm2	1.766e-230	0.891686	0.801	0.026	4.94446e-226	E13.5-6
Ranbp3l	1.16699e-275	0.886853	0.783	0.007	3.26733e-271	E13.5-6
Ostf1	8.07774e-118	0.883659	0.888	0.17	2.2616e-113	E13.5-6
B2m	6.91159e-125	0.881671	0.863	0.141	1.93511e-120	E13.5-6
Fn1	4.72929e-231	0.879612	0.783	0.022	1.32411e-226	E13.5-6
Gramd3	8.90944e-269	0.873579	0.807	0.012	2.49447e-264	E13.5-6
Prkcdbp	1.06418e-188	0.872645	0.783	0.044	2.9795e-184	E13.5-6
Tead2	1.49214e-195	0.863993	0.876	0.057	4.17769e-191	E13.5-6
P4hb	1.78543e-72	0.863336	0.994	0.585	4.99885e-68	E13.5-6
Pcca	4.29258e-133	0.862087	0.839	0.113	1.20184e-128	E13.5-6
Birc5	9.75908e-68	0.85963	0.317	0.02	2.73235e-63	E13.5-6
Msx1	9.82962e-176	0.855709	0.634	0.02	2.7521e-171	E13.5-6
H1f0	6.22435e-23	0.852728	0.913	0.753	1.74269e-18	E13.5-6
Tmem150a	1.1573e-78	0.851684	0.783	0.202	3.2402e-74	E13.5-6
Ssr2	1.48301e-57	0.850714	0.994	0.769	4.15212e-53	E13.5-6
Nr2f2	1.67321e-68	0.84956	0.969	0.385	4.68465e-64	E13.5-6
Aldh7a1	6.49809e-121	0.845886	0.876	0.154	1.81934e-116	E13.5-6
Nr2f1	6.20276e-113	0.841759	0.925	0.179	1.73665e-108	E13.5-6
Arhgap20	4.57533e-137	0.839788	0.776	0.085	1.281e-132	E13.5-6
Id1	3.02022e-192	0.836047	0.758	0.035	8.45601e-188	E13.5-6
Tcf12	7.20347e-69	0.835524	0.963	0.494	2.01683e-64	E13.5-6
Cstb	1.59141e-64	0.831236	0.957	0.505	4.45563e-60	E13.5-6
Clic1	5.3127e-62	0.83113	0.981	0.48	1.48745e-57	E13.5-6
Gadd45b	7.59127e-207	0.827588	0.727	0.023	2.1254e-202	E13.5-6
Gng11	1.40517e-270	0.825833	0.807	0.011	3.93419e-266	E13.5-6
Cks2	7.72669e-41	0.825152	0.509	0.125	2.16332e-36	E13.5-6
Serf2	1.43709e-84	0.82437	1	0.99	4.02357e-80	E13.5-6
Maged2	3.81593e-59	0.824156	0.988	0.836	1.06839e-54	E13.5-6
Edn3	2.52603e-250	0.816727	0.745	0.01	7.07239e-246	E13.5-6
Pmp22	2.0832e-259	0.808485	0.758	0.009	5.83254e-255	E13.5-6
Ptgis	1.54599e-231	0.807685	0.683	0.008	4.32846e-227	E13.5-6
Fkbp9	5.36951e-174	0.802287	0.807	0.062	1.50335e-169	E13.5-6
Kdelr1	2.30925e-61	0.799275	0.981	0.747	6.46543e-57	E13.5-6
Cdh5	4.1261e-247	0.798889	0.733	0.009	1.15523e-242	E13.5-6
Rplp1	8.52749e-81	0.79544	1	0.994	2.38753e-76	E13.5-6
Rps20	6.46873e-83	0.793422	1	0.994	1.81112e-78	E13.5-6
Sp5	4.58537e-219	0.790344	0.702	0.014	1.28381e-214	E13.5-6
Ddost	5.2521e-67	0.790127	0.981	0.707	1.47048e-62	E13.5-6
Ctsk	5.09799e-173	0.789102	0.571	0.013	1.42734e-168	E13.5-6
Fth1	2.59211e-83	0.787539	1	0.998	7.2574e-79	E13.5-6
Pofut2	4.62193e-72	0.783099	0.944	0.413	1.29405e-67	E13.5-6
Kdelr2	1.49113e-54	0.781178	0.932	0.491	4.17488e-50	E13.5-6
Galk1	7.44674e-114	0.774916	0.857	0.156	2.08494e-109	E13.5-6
Tcn2	2.18797e-158	0.766373	0.77	0.062	6.12587e-154	E13.5-6
Eef1d	9.3831e-58	0.764083	0.981	0.655	2.62708e-53	E13.5-6
Egr1	2.11057e-110	0.764024	0.727	0.093	5.90917e-106	E13.5-6
Ost4	6.40106e-58	0.763837	0.981	0.722	1.79217e-53	E13.5-6
Flna	2.55344e-87	0.759844	0.863	0.221	7.14911e-83	E13.5-6
Pid1	5.18781e-65	0.756771	0.888	0.327	1.45248e-60	E13.5-6
Pdgfrb	2.91133e-260	0.754507	0.764	0.009	8.15113e-256	E13.5-6
Etfb	1.08772e-59	0.750757	0.95	0.519	3.04541e-55	E13.5-6
Fmod	8.87702e-138	0.750727	0.429	0.006	2.48539e-133	E13.5-6
Cd302	4.0618e-169	0.75033	0.727	0.044	1.13722e-164	E13.5-6
Tmed10	2.18474e-57	0.749953	0.969	0.689	6.11685e-53	E13.5-6
Tnfrsf19	1.46735e-85	0.749476	0.851	0.196	4.10829e-81	E13.5-6
Dap	1.93531e-65	0.749219	0.832	0.283	5.41848e-61	E13.5-6
Wnt4	2.76098e-78	0.748534	0.658	0.115	7.73019e-74	E13.5-6
Klf13	9.63042e-52	0.747689	0.901	0.488	2.69633e-47	E13.5-6
Cdc42ep5	3.17666e-143	0.746945	0.807	0.088	8.89402e-139	E13.5-6
Vstm4	6.85821e-252	0.746731	0.739	0.009	1.92016e-247	E13.5-6
Crip1	2.57562e-67	0.734895	0.578	0.101	7.21123e-63	E13.5-6
Sept2	1.07231e-64	0.734331	0.963	0.491	3.00225e-60	E13.5-6
Vkorc1	4.1597e-82	0.732733	0.82	0.21	1.16463e-77	E13.5-6
Gatm	3.19084e-78	0.732133	0.627	0.109	8.93371e-74	E13.5-6
Creb3l1	7.99512e-190	0.730366	0.745	0.035	2.23847e-185	E13.5-6
Pdia6	3.32912e-47	0.730075	0.957	0.709	9.32086e-43	E13.5-6
Ctsb	1.05427e-54	0.728537	0.975	0.656	2.95174e-50	E13.5-6
Zfp36l2	3.42778e-163	0.728011	0.783	0.061	9.5971e-159	E13.5-6
Col6a3	4.03486e-238	0.725372	0.708	0.009	1.12968e-233	E13.5-6
Arpc1b	3.29835e-131	0.725168	0.789	0.091	9.23472e-127	E13.5-6
Ppp1r1a	1.77298e-25	0.724087	0.957	0.728	4.964e-21	E13.5-6
Cenpa	5.29002e-23	0.724038	0.255	0.053	1.4811e-18	E13.5-6
Sri	5.1598e-52	0.723451	0.925	0.568	1.44464e-47	E13.5-6
Slc38a3	1.16076e-237	0.723403	0.733	0.012	3.24989e-233	E13.5-6
Hmgcs2	6.62152e-178	0.723173	0.516	0.004	1.85389e-173	E13.5-6
Myl9	9.12421e-173	0.722161	0.689	0.033	2.5546e-168	E13.5-6
Hic1	1.73223e-253	0.719222	0.739	0.008	4.84989e-249	E13.5-6
Mmp11	2.68357e-61	0.716366	0.727	0.202	7.51346e-57	E13.5-6
Rhoj	8.5365e-189	0.712794	0.584	0.009	2.39005e-184	E13.5-6
Lamp2	1.10358e-85	0.712225	0.839	0.204	3.0898e-81	E13.5-6
Foxd1	6.45094e-215	0.712127	0.689	0.014	1.80614e-210	E13.5-6
Tmem64	5.0628e-149	0.711366	0.739	0.059	1.41748e-144	E13.5-6
Crtap	1.0334e-195	0.710823	0.727	0.029	2.8933e-191	E13.5-6
Vcan	1.3493e-37	0.70938	0.882	0.503	3.77778e-33	E13.5-6
Notch2	1.71495e-179	0.708962	0.59	0.013	4.80151e-175	E13.5-6
Txnip	5.44697e-128	0.708693	0.764	0.084	1.52504e-123	E13.5-6
Tnfrsf1a	8.06994e-247	0.707313	0.758	0.012	2.25942e-242	E13.5-6
Prdx1	5.58998e-52	0.707288	1	0.847	1.56508e-47	E13.5-6
Top2a	1.49351e-68	0.707142	0.273	0.011	4.18152e-64	E13.5-6
Slc19a1	2.30494e-83	0.705627	0.708	0.135	6.45336e-79	E13.5-6
Sdc2	1.35668e-166	0.704461	0.745	0.047	3.79843e-162	E13.5-6
Angptl2	2.08062e-180	0.704094	0.634	0.018	5.82531e-176	E13.5-6
Pdgfra	2.33208e-258	0.703715	0.745	0.007	6.52935e-254	E13.5-6
Il11ra1	8.71038e-75	0.703638	0.72	0.161	2.43873e-70	E13.5-6
Mxra8	2.58833e-215	0.700949	0.714	0.018	7.24681e-211	E13.5-6
Slc3a2	6.05564e-39	0.699778	0.851	0.469	1.69546e-34	E13.5-6
Bmp5	4.31749e-222	0.696068	0.689	0.012	1.20881e-217	E13.5-6
Bsg	6.17847e-65	0.6949	1	0.977	1.72985e-60	E13.5-6
Acadl	1.9679e-119	0.694892	0.783	0.105	5.50973e-115	E13.5-6
Ahnak	3.95397e-234	0.694873	0.714	0.011	1.10703e-229	E13.5-6
Rps27	1.19985e-77	0.694637	1	0.999	3.35935e-73	E13.5-6
Aard	1.29721e-91	0.693122	0.497	0.043	3.63193e-87	E13.5-6
Col4a5	1.5689e-225	0.691984	0.702	0.012	4.39261e-221	E13.5-6
Cat	3.27855e-50	0.691266	0.876	0.431	9.17928e-46	E13.5-6
Mmp14	1.30206e-190	0.68968	0.745	0.032	3.6455e-186	E13.5-6
Ech1	1.6406e-57	0.689202	0.913	0.413	4.59336e-53	E13.5-6
Bcl7c	9.04641e-53	0.685362	0.95	0.564	2.53281e-48	E13.5-6
Acaa2	1.17871e-106	0.678056	0.807	0.136	3.30014e-102	E13.5-6
Parm1	5.09731e-218	0.674549	0.702	0.015	1.42714e-213	E13.5-6
Col13a1	2.76625e-216	0.673478	0.646	0.008	7.74493e-212	E13.5-6
Serpinb6a	6.02469e-73	0.673192	0.783	0.207	1.68679e-68	E13.5-6
Vimp	3.51255e-36	0.672003	0.894	0.557	9.83444e-32	E13.5-6
Pth1r	2.10587e-113	0.671549	0.708	0.084	5.89601e-109	E13.5-6
Smc4	3.94173e-61	0.67125	0.596	0.121	1.10361e-56	E13.5-6
Yap1	7.85026e-239	0.663667	0.72	0.01	2.19792e-234	E13.5-6
Lama2	1.185e-206	0.663462	0.64	0.01	3.31775e-202	E13.5-6
Tom1l1	1.50976e-124	0.662802	0.727	0.08	4.22703e-120	E13.5-6
Sulf2	7.42171e-47	0.662469	0.814	0.326	2.07793e-42	E13.5-6
Ifitm3	1.67297e-185	0.661834	0.553	0.006	4.68397e-181	E13.5-6
Raly	7.30282e-58	0.659795	1	0.952	2.04464e-53	E13.5-6
Ccnb2	8.90233e-71	0.658701	0.379	0.031	2.49247e-66	E13.5-6
Tmem176a	2.7516e-61	0.657698	0.783	0.243	7.70393e-57	E13.5-6
Ptbp1	1.46883e-85	0.655515	0.857	0.207	4.11242e-81	E13.5-6
Arhgef25	5.5103e-102	0.651726	0.795	0.138	1.54277e-97	E13.5-6
Siva1	8.08411e-61	0.650957	0.839	0.31	2.26339e-56	E13.5-6
Cpq	3.77071e-118	0.649189	0.801	0.111	1.05572e-113	E13.5-6
S1pr3	8.24326e-243	0.649066	0.714	0.008	2.30795e-238	E13.5-6
Prrx1	1.94418e-254	0.648541	0.708	0.004	5.44331e-250	E13.5-6
Cdk1	1.1323e-120	0.648133	0.416	0.01	3.1702e-116	E13.5-6
Enpp2	3.34725e-114	0.644777	0.571	0.043	9.37164e-110	E13.5-6
Man2a1	5.19835e-136	0.643778	0.677	0.054	1.45544e-131	E13.5-6
Rps4x	2.89925e-79	0.643186	1	0.999	8.11732e-75	E13.5-6
H2afv	2.52569e-39	0.642616	0.994	0.928	7.07144e-35	E13.5-6
Tmem165	2.00564e-54	0.640916	0.95	0.542	5.61539e-50	E13.5-6
Zcchc24	1.41304e-227	0.640819	0.702	0.011	3.95622e-223	E13.5-6
Lamc1	6.08509e-138	0.640108	0.683	0.054	1.7037e-133	E13.5-6
Rpl28	2.55093e-79	0.638322	1	0.996	7.1421e-75	E13.5-6
Cks1b	1.06391e-26	0.638216	0.745	0.418	2.97874e-22	E13.5-6
Nucb1	4.22111e-65	0.637708	0.839	0.294	1.18183e-60	E13.5-6
Eci2	1.57188e-46	0.636673	0.95	0.578	4.40095e-42	E13.5-6
Axl	3.18647e-211	0.636291	0.702	0.017	8.92148e-207	E13.5-6
Hsp90b1	2.61279e-32	0.635646	0.969	0.744	7.3153e-28	E13.5-6
Tmem167	7.41624e-41	0.634975	0.988	0.842	2.0764e-36	E13.5-6
Tmem176b	2.58137e-32	0.633455	0.932	0.678	7.22731e-28	E13.5-6
Calu	6.37464e-52	0.633106	0.87	0.404	1.78477e-47	E13.5-6
Tpcn1	9.81242e-175	0.631176	0.752	0.043	2.74728e-170	E13.5-6
Mt2	2.22083e-96	0.63108	0.46	0.031	6.21789e-92	E13.5-6
Pard6g	4.10711e-47	0.630355	0.925	0.519	1.14991e-42	E13.5-6
Fkbp7	1.8588e-173	0.630311	0.739	0.041	5.20428e-169	E13.5-6
Rbms2	1.52936e-145	0.628942	0.758	0.065	4.2819e-141	E13.5-6
Axin2	4.84648e-89	0.628803	0.745	0.136	1.35692e-84	E13.5-6
Wipi1	4.64594e-155	0.62756	0.702	0.045	1.30077e-150	E13.5-6
Impdh2	1.13828e-47	0.627521	0.969	0.615	3.18697e-43	E13.5-6
Isyna1	2.12965e-32	0.626986	0.913	0.652	5.96259e-28	E13.5-6
Epb41l2	3.92161e-77	0.626652	0.702	0.139	1.09797e-72	E13.5-6
Tcf3	3.29502e-51	0.62465	0.919	0.474	9.2254e-47	E13.5-6
Glmp	1.35591e-69	0.623125	0.826	0.236	3.79629e-65	E13.5-6
Ak3	6.80036e-61	0.621518	0.832	0.303	1.90397e-56	E13.5-6
Lama1	4.37976e-106	0.62121	0.596	0.059	1.22625e-101	E13.5-6
Npc2	1.53355e-47	0.619638	0.994	0.842	4.29364e-43	E13.5-6
Hnrnpf	6.17594e-45	0.61788	0.994	0.859	1.72914e-40	E13.5-6
Efnb1	8.03646e-44	0.61731	0.857	0.389	2.25005e-39	E13.5-6
Rab34	1.03073e-53	0.61714	0.814	0.308	2.88583e-49	E13.5-6
Cyp1b1	1.50345e-232	0.61636	0.671	0.006	4.20936e-228	E13.5-6
Serping1	6.73081e-87	0.616024	0.665	0.103	1.88449e-82	E13.5-6
Uaca	1.60014e-190	0.615897	0.646	0.017	4.48007e-186	E13.5-6
Tuba1b	2.32184e-23	0.615551	1	0.985	6.50068e-19	E13.5-6
Pon2	4.86492e-135	0.615367	0.689	0.056	1.36208e-130	E13.5-6
Rnf181	1.50474e-26	0.614682	0.789	0.499	4.21296e-22	E13.5-6
S100a13	3.22636e-202	0.611752	0.683	0.018	9.03317e-198	E13.5-6
Scarf2	1.47838e-240	0.609584	0.708	0.008	4.13917e-236	E13.5-6
Hspa5	4.49116e-42	0.608015	0.981	0.742	1.25743e-37	E13.5-6
Kank2	1.56222e-242	0.606489	0.702	0.007	4.37389e-238	E13.5-6
Rpl36a	3.98602e-61	0.605025	1	0.984	1.11601e-56	E13.5-6
B3gnt9	7.96483e-170	0.603549	0.646	0.026	2.22999e-165	E13.5-6
Rpn2	4.79593e-33	0.598191	0.932	0.706	1.34276e-28	E13.5-6
Prrx2	1.82344e-212	0.596887	0.621	0.006	5.10526e-208	E13.5-6
Egflam	7.72782e-192	0.593962	0.59	0.009	2.16364e-187	E13.5-6
Vcam1	7.50518e-214	0.593372	0.609	0.004	2.1013e-209	E13.5-6
Fbn1	5.85102e-204	0.592639	0.72	0.023	1.63817e-199	E13.5-6
1190002N15Rik	1.06971e-64	0.592007	0.739	0.191	2.99496e-60	E13.5-6
Anp32b	6.82947e-33	0.591768	0.944	0.746	1.91212e-28	E13.5-6
Ctdsp2	1.31031e-65	0.589761	0.783	0.223	3.6686e-61	E13.5-6
Kdelr3	3.97497e-181	0.587695	0.54	0.006	1.11291e-176	E13.5-6
Rps12	3.40953e-62	0.587481	1	0.992	9.54599e-58	E13.5-6
a	7.2549e-219	0.587115	0.615	0.004	2.03123e-214	E13.5-6
Plp2	3.98261e-73	0.585292	0.677	0.138	1.11505e-68	E13.5-6
Zic5	1.73771e-108	0.582088	0.733	0.09	4.86523e-104	E13.5-6
Cd164	3.66484e-93	0.58167	0.758	0.132	1.02608e-88	E13.5-6
Hspa1a	9.10495e-89	0.581113	0.522	0.052	2.5492e-84	E13.5-6
Ror2	7.20838e-144	0.580906	0.708	0.053	2.0182e-139	E13.5-6
Cdc20	1.01739e-49	0.580837	0.298	0.028	2.84849e-45	E13.5-6
Oat	3.73864e-56	0.57963	0.801	0.279	1.04674e-51	E13.5-6
Fam114a1	1.81841e-174	0.579421	0.665	0.027	5.09117e-170	E13.5-6
Foxc2	3.73467e-199	0.57861	0.559	0.003	1.04563e-194	E13.5-6
Elovl1	2.253e-77	0.577432	0.739	0.161	6.30795e-73	E13.5-6
Spc25	1.44227e-99	0.576876	0.335	0.007	4.03807e-95	E13.5-6
Cpxm1	1.81454e-103	0.575443	0.671	0.083	5.08034e-99	E13.5-6
Cdh11	5.20536e-59	0.572789	0.714	0.181	1.4574e-54	E13.5-6
Stt3a	2.27958e-54	0.572705	0.783	0.27	6.38237e-50	E13.5-6
Ghr	6.56227e-183	0.571529	0.627	0.017	1.8373e-178	E13.5-6
Rab3il1	1.04166e-74	0.570582	0.758	0.174	2.91645e-70	E13.5-6
Capzb	4.38446e-43	0.569647	1	0.946	1.22756e-38	E13.5-6
Ccna2	1.10652e-69	0.56948	0.298	0.015	3.09802e-65	E13.5-6
Dpm3	2.10155e-46	0.569379	0.851	0.394	5.88391e-42	E13.5-6
Zic4	3.49943e-59	0.568579	0.907	0.259	9.79771e-55	E13.5-6
Ostc	1.14973e-38	0.568069	0.994	0.818	3.21901e-34	E13.5-6
Anxa7	1.85013e-93	0.566481	0.665	0.097	5.18e-89	E13.5-6
Krtcap2	1.32556e-45	0.565908	0.994	0.885	3.71129e-41	E13.5-6
Snx5	1.05107e-53	0.564726	0.913	0.409	2.9428e-49	E13.5-6
Blvrb	7.675e-120	0.564723	0.64	0.056	2.14885e-115	E13.5-6
Rpl22	7.40034e-50	0.56423	1	0.969	2.07195e-45	E13.5-6
Itgb1	8.12452e-41	0.562879	0.87	0.487	2.2747e-36	E13.5-6
Cnpy2	7.80284e-37	0.561998	0.975	0.807	2.18464e-32	E13.5-6
Maf	6.12859e-118	0.56074	0.59	0.044	1.71588e-113	E13.5-6
Abca1	5.54558e-183	0.556344	0.652	0.02	1.55265e-178	E13.5-6
Tnfaip8	2.89135e-187	0.555063	0.602	0.012	8.09519e-183	E13.5-6
Aldh1a2	3.8498e-156	0.554158	0.46	0.004	1.07787e-151	E13.5-6
Gsta4	4.7031e-169	0.551629	0.516	0.007	1.31677e-164	E13.5-6
Lpp	5.1911e-108	0.550528	0.646	0.069	1.45341e-103	E13.5-6
Mfge8	5.64842e-98	0.550219	0.64	0.078	1.58144e-93	E13.5-6
Rplp0	5.41491e-65	0.5502	1	0.998	1.51607e-60	E13.5-6
Snai1	9.17507e-215	0.549047	0.665	0.01	2.56884e-210	E13.5-6
Cmtm7	3.16927e-194	0.548851	0.64	0.014	8.87333e-190	E13.5-6
Ctdsp1	4.00616e-166	0.548402	0.683	0.034	1.12164e-161	E13.5-6
Mdfi	2.15221e-145	0.547995	0.584	0.026	6.02575e-141	E13.5-6
Rps29	6.09831e-73	0.547275	1	1	1.7074e-68	E13.5-6
Pfn1	2.22484e-53	0.546953	1	0.991	6.2291e-49	E13.5-6
Gjb2	8.06858e-122	0.546029	0.391	0.007	2.25904e-117	E13.5-6
Nfib	9.48958e-131	0.54556	0.677	0.051	2.65689e-126	E13.5-6
Twist1	1.55341e-133	0.545558	0.602	0.036	4.34923e-129	E13.5-6
Rpl13a	2.63702e-72	0.544922	1	0.999	7.38312e-68	E13.5-6
Atp6v0e	4.11549e-40	0.543517	0.876	0.456	1.15226e-35	E13.5-6
Stx4a	9.69447e-83	0.543305	0.665	0.108	2.71426e-78	E13.5-6
Rhoa	5.18327e-39	0.542734	0.981	0.809	1.45121e-34	E13.5-6
Rpl13	8.38758e-73	0.542073	1	1	2.34835e-68	E13.5-6
Eif4ebp1	6.16534e-94	0.541929	0.708	0.106	1.72617e-89	E13.5-6
Tram1	8.80874e-55	0.541366	0.82	0.286	2.46627e-50	E13.5-6
Serp1	8.45933e-37	0.541141	0.87	0.531	2.36844e-32	E13.5-6
Gng5	3.38536e-43	0.540396	1	0.915	9.47834e-39	E13.5-6
Fut8	1.09644e-33	0.540071	0.727	0.314	3.06981e-29	E13.5-6
H2afz	6.32556e-05	0.539833	1	0.997	1	E13.5-6
Ilk	2.377e-40	0.538614	0.969	0.623	6.65514e-36	E13.5-6
Rps27l	1.74034e-38	0.538556	0.969	0.838	4.87261e-34	E13.5-6
Tmed3	4.41485e-46	0.538519	0.82	0.34	1.23607e-41	E13.5-6
Mcm6	3.02115e-84	0.536774	0.497	0.049	8.4586e-80	E13.5-6
Nfia	2.52622e-137	0.536389	0.609	0.034	7.07291e-133	E13.5-6
Rps18	1.07065e-61	0.535965	1	1	2.99762e-57	E13.5-6
C1qtnf2	1.7739e-159	0.535698	0.584	0.02	4.96656e-155	E13.5-6
St6galnac3	3.30239e-89	0.535156	0.677	0.104	9.24603e-85	E13.5-6
Surf4	4.86114e-38	0.534995	0.863	0.461	1.36102e-33	E13.5-6
Rpl39	7.32824e-62	0.534623	1	0.999	2.05176e-57	E13.5-6
Tle1	4.97271e-48	0.532815	0.714	0.213	1.39226e-43	E13.5-6
Ier2	7.4255e-49	0.532215	0.752	0.244	2.07899e-44	E13.5-6
Col27a1	1.22591e-196	0.53199	0.602	0.009	3.4323e-192	E13.5-6
Plin3	2.72796e-131	0.530262	0.59	0.035	7.63774e-127	E13.5-6
Rab13	5.29641e-97	0.530185	0.64	0.08	1.48289e-92	E13.5-6
Plxdc2	4.15814e-106	0.529862	0.652	0.071	1.1642e-101	E13.5-6
Ifi27	5.15986e-115	0.528604	0.429	0.015	1.44466e-110	E13.5-6
Bola3	3.45093e-52	0.527276	0.77	0.259	9.66192e-48	E13.5-6
Sept11	6.89218e-33	0.526574	0.932	0.614	1.92967e-28	E13.5-6
Mfsd10	8.27137e-58	0.525748	0.758	0.23	2.31582e-53	E13.5-6
Tmem45a	2.68103e-194	0.525676	0.565	0.005	7.50636e-190	E13.5-6
Tgfbr2	4.23706e-188	0.522767	0.584	0.009	1.18629e-183	E13.5-6
Ddr2	4.01308e-184	0.521252	0.565	0.008	1.12358e-179	E13.5-6
Junb	1.9593e-53	0.518892	0.571	0.122	5.48565e-49	E13.5-6
Foxf2	2.88828e-204	0.515826	0.571	0.003	8.08659e-200	E13.5-6
Ssr4	9.73833e-36	0.514625	0.969	0.745	2.72654e-31	E13.5-6
Fzd2	5.35907e-143	0.514263	0.609	0.032	1.50043e-138	E13.5-6
Cp	3.06443e-185	0.513105	0.547	0.006	8.5798e-181	E13.5-6
Loxl1	7.01519e-154	0.512645	0.54	0.015	1.96411e-149	E13.5-6
Chst14	2.35955e-174	0.510457	0.596	0.016	6.60628e-170	E13.5-6
Itgb5	2.94573e-196	0.510239	0.584	0.006	8.24747e-192	E13.5-6
Slc22a23	1.13774e-72	0.510044	0.652	0.122	3.18546e-68	E13.5-6
Paics	9.27315e-35	0.50967	0.894	0.565	2.5963e-30	E13.5-6
Slc29a1	1.59738e-114	0.508086	0.447	0.018	4.47235e-110	E13.5-6
Ctsd	3.75688e-36	0.508073	0.907	0.579	1.05185e-31	E13.5-6
Hist1h2ap	2.49739e-15	0.507756	0.267	0.081	6.99221e-11	E13.5-6
Glipr2	3.8236e-44	0.507377	0.776	0.297	1.07053e-39	E13.5-6
Fam20a	5.39676e-189	0.505441	0.547	0.004	1.51099e-184	E13.5-6
Ddit4	1.10714e-54	0.505139	0.646	0.155	3.09977e-50	E13.5-6
Cped1	1.33341e-206	0.504067	0.596	0.005	3.73327e-202	E13.5-6
Ckap4	3.71773e-31	0.503707	0.957	0.763	1.04089e-26	E13.5-6
Hdac1	4.99969e-40	0.503473	0.851	0.407	1.39981e-35	E13.5-6
Lamp1	3.74988e-37	0.501751	1	0.908	1.04989e-32	E13.5-6
Lox	5.24978e-148	0.501693	0.422	0.002	1.46983e-143	E13.5-6
Dbi	3.38371e-28	0.50165	0.919	0.64	9.47371e-24	E13.5-6
Rnh1	4.65754e-45	0.501619	0.758	0.289	1.30402e-40	E13.5-6
Thbs4	2.44021e-153	0.500557	0.447	0.004	6.83211e-149	E13.5-6
Gmds	7.55367e-56	0.500495	0.764	0.232	2.11488e-51	E13.5-6
Heyl	1.72973e-179	0.500407	0.503	0.002	4.8429e-175	E13.5-6
Npr3	6.36401e-163	0.500288	0.478	0.004	1.7818e-158	E13.5-6
Wwtr1	9.39818e-202	0.500084	0.578	0.004	2.6313e-197	E13.5-6
Tmem123	1.52159e-115	0.500081	0.609	0.05	4.26016e-111	E13.5-6
Zfyve21	2.44467e-91	0.499702	0.652	0.092	6.84459e-87	E13.5-6
Hmgn2	5.94882e-14	0.498656	0.944	0.914	1.66555e-09	E13.5-6
Idh2	2.26339e-30	0.497873	0.919	0.707	6.33704e-26	E13.5-6
Hdlbp	7.76665e-41	0.497764	0.845	0.396	2.17451e-36	E13.5-6
Zyx	6.25955e-39	0.496833	0.776	0.358	1.75255e-34	E13.5-6
Actn4	1.94226e-40	0.496504	0.727	0.27	5.43795e-36	E13.5-6
9430020K01Rik	1.15934e-172	0.495763	0.596	0.017	3.24591e-168	E13.5-6
Cebpb	1.17205e-145	0.49378	0.565	0.023	3.28149e-141	E13.5-6
Arhgap28	2.38504e-121	0.493729	0.602	0.045	6.67765e-117	E13.5-6
Parva	1.11793e-82	0.493448	0.696	0.117	3.12997e-78	E13.5-6
Gprc5b	3.0344e-94	0.492698	0.491	0.039	8.49571e-90	E13.5-6
Pdzrn3	8.73902e-106	0.491982	0.714	0.082	2.44675e-101	E13.5-6
Zic2	3.75955e-113	0.491825	0.658	0.064	1.0526e-108	E13.5-6
Itga11	1.75939e-180	0.489191	0.534	0.006	4.92595e-176	E13.5-6
Slc1a5	7.99958e-100	0.48867	0.534	0.043	2.23972e-95	E13.5-6
Ctsl	6.87415e-26	0.488628	0.913	0.63	1.92463e-21	E13.5-6
Ginm1	8.1635e-61	0.488548	0.702	0.174	2.28562e-56	E13.5-6
Pttg1ip	2.73558e-47	0.486025	0.683	0.207	7.65909e-43	E13.5-6
Shc1	1.00577e-108	0.48593	0.596	0.054	2.81594e-104	E13.5-6
H2afx	0.00904285	0.485789	0.677	0.645	1	E13.5-6
Ext2	1.2424e-39	0.485528	0.783	0.346	3.47847e-35	E13.5-6
Ergic3	4.66149e-38	0.484387	0.994	0.895	1.30512e-33	E13.5-6
Sptbn1	1.09073e-30	0.484268	0.994	0.795	3.05382e-26	E13.5-6
Rasl11b	1.90753e-118	0.484136	0.565	0.037	5.34069e-114	E13.5-6
Il13ra1	1.14023e-167	0.484103	0.609	0.02	3.19242e-163	E13.5-6
Ccnb1	2.15071e-50	0.484049	0.23	0.013	6.02157e-46	E13.5-6
Col11a1	1.54903e-88	0.484033	0.54	0.054	4.33696e-84	E13.5-6
Tpm3-rs7	1.37162e-33	0.481991	0.807	0.33	3.84027e-29	E13.5-6
Amotl1	6.19441e-61	0.481351	0.689	0.161	1.73431e-56	E13.5-6
Vamp3	2.03472e-51	0.48126	0.758	0.239	5.6968e-47	E13.5-6
Fam174a	3.75087e-43	0.481012	0.652	0.209	1.05017e-38	E13.5-6
Ccnd2	2.66208e-110	0.48081	0.484	0.025	7.45329e-106	E13.5-6
Smo	8.21375e-82	0.480161	0.683	0.113	2.29969e-77	E13.5-6
Klf4	5.31957e-114	0.48003	0.472	0.021	1.48937e-109	E13.5-6
Sec11a	1.60312e-34	0.479101	0.957	0.768	4.48842e-30	E13.5-6
Rassf8	1.25646e-119	0.478879	0.578	0.04	3.51784e-115	E13.5-6
Fermt2	2.27167e-63	0.477406	0.714	0.172	6.36022e-59	E13.5-6
Marc2	5.42745e-38	0.476719	0.739	0.303	1.51958e-33	E13.5-6
Rps27a	3.33295e-64	0.476083	1	0.999	9.33158e-60	E13.5-6
Rpl3	1.79999e-56	0.475967	1	0.999	5.03962e-52	E13.5-6
Smad3	4.28093e-148	0.475859	0.559	0.021	1.19857e-143	E13.5-6
Gas1	1.36176e-103	0.47571	0.466	0.027	3.81267e-99	E13.5-6
Trf	2.26614e-100	0.475182	0.484	0.032	6.34474e-96	E13.5-6
Olfml3	3.8335e-131	0.474399	0.447	0.01	1.0733e-126	E13.5-6
Hadha	3.04245e-38	0.474364	0.764	0.339	8.51826e-34	E13.5-6
Slc50a1	2.37171e-63	0.473963	0.683	0.152	6.6403e-59	E13.5-6
Rps9	1.79457e-62	0.473398	1	0.999	5.02443e-58	E13.5-6
Plxnb2	4.21427e-40	0.47319	0.758	0.3	1.17991e-35	E13.5-6
Ugp2	1.16526e-33	0.470267	0.801	0.412	3.2625e-29	E13.5-6
Laptm4b	1.48162e-66	0.470009	0.634	0.121	4.14825e-62	E13.5-6
P3h1	3.40336e-109	0.468443	0.534	0.037	9.52874e-105	E13.5-6
Akr7a5	9.6829e-30	0.468303	0.764	0.374	2.71102e-25	E13.5-6
Fuca1	1.02618e-39	0.468163	0.764	0.325	2.8731e-35	E13.5-6
Rpl22l1	8.37316e-32	0.467927	1	0.969	2.34432e-27	E13.5-6
Sfr1	5.81589e-34	0.46784	0.969	0.806	1.62833e-29	E13.5-6
Fosb	2.82048e-82	0.46756	0.472	0.043	7.89678e-78	E13.5-6
Tjp1	7.98632e-79	0.467451	0.627	0.098	2.23601e-74	E13.5-6
Rps15a	1.77043e-58	0.466271	1	0.998	4.95685e-54	E13.5-6
Snx6	5.86348e-28	0.465686	0.95	0.704	1.64166e-23	E13.5-6
Pcdh18	2.26945e-125	0.46551	0.553	0.03	6.35401e-121	E13.5-6
Rcsd1	2.60558e-172	0.465169	0.534	0.008	7.29512e-168	E13.5-6
Lta4h	4.37858e-48	0.464674	0.72	0.226	1.22591e-43	E13.5-6
Lman1	1.44155e-42	0.464623	0.758	0.285	4.03605e-38	E13.5-6
Dock6	1.58919e-168	0.46256	0.571	0.014	4.44942e-164	E13.5-6
Spc24	2.33144e-71	0.462079	0.317	0.017	6.52757e-67	E13.5-6
Tmbim6	8.41466e-29	0.461871	0.932	0.693	2.35594e-24	E13.5-6
Gng12	2.09525e-122	0.461733	0.54	0.031	5.86628e-118	E13.5-6
Calr	2.7006e-21	0.460968	0.981	0.905	7.56113e-17	E13.5-6
Pald1	8.32184e-116	0.460703	0.565	0.04	2.32995e-111	E13.5-6
Yif1a	2.3167e-43	0.46041	0.77	0.286	6.48629e-39	E13.5-6
Bcl2l12	5.38279e-161	0.460173	0.522	0.01	1.50707e-156	E13.5-6
Rpl37a	1.26263e-57	0.458728	1	0.999	3.5351e-53	E13.5-6
Copb2	1.8287e-31	0.458303	0.888	0.483	5.12e-27	E13.5-6
Rps8	3.90215e-57	0.457157	1	1	1.09252e-52	E13.5-6
Etfa	5.32721e-43	0.457126	0.801	0.305	1.49151e-38	E13.5-6
Slc7a11	2.2977e-116	0.456858	0.447	0.017	6.43311e-112	E13.5-6
Hmg20b	5.85543e-38	0.456364	0.714	0.275	1.6394e-33	E13.5-6
Snhg18	1.24608e-98	0.456212	0.478	0.033	3.48878e-94	E13.5-6
Sned1	9.07443e-149	0.456108	0.478	0.009	2.54066e-144	E13.5-6
Rrm2	8.48604e-19	0.4561	0.292	0.083	2.37592e-14	E13.5-6
Hebp1	4.3274e-133	0.456047	0.522	0.021	1.21159e-128	E13.5-6
Flnc	9.84682e-185	0.455791	0.534	0.004	2.75691e-180	E13.5-6
Ssr3	1.678e-26	0.455786	0.963	0.755	4.69808e-22	E13.5-6
Lrp1	3.8666e-29	0.455591	0.832	0.457	1.08257e-24	E13.5-6
Capn2	2.20026e-28	0.455281	0.857	0.513	6.1603e-24	E13.5-6
Fundc2	1.63175e-26	0.455154	0.919	0.714	4.56857e-22	E13.5-6
Rnf26	4.73507e-34	0.454857	0.553	0.185	1.32572e-29	E13.5-6
Fabp7	2.91337e-23	0.454671	0.348	0.089	8.15684e-19	E13.5-6
Anp32a	4.05641e-25	0.454392	0.95	0.778	1.13571e-20	E13.5-6
Phldb2	4.10868e-111	0.454365	0.534	0.035	1.15035e-106	E13.5-6
Syngr2	6.9039e-183	0.454341	0.565	0.008	1.93295e-178	E13.5-6
Wisp1	1.12868e-138	0.454318	0.441	0.007	3.16008e-134	E13.5-6
Erp44	2.40616e-36	0.453509	0.814	0.378	6.73675e-32	E13.5-6
Rbpms	1.33115e-188	0.453081	0.578	0.008	3.72696e-184	E13.5-6
Trip6	2.19491e-112	0.452927	0.559	0.04	6.14532e-108	E13.5-6
Rps3a1	6.80291e-50	0.45279	1	0.999	1.90468e-45	E13.5-6
Nkd2	1.40176e-68	0.452519	0.447	0.051	3.92464e-64	E13.5-6
Rarres2	6.21025e-157	0.452285	0.484	0.007	1.73874e-152	E13.5-6
Ninj1	1.1644e-115	0.451686	0.571	0.042	3.2601e-111	E13.5-6
Siah2	1.38995e-39	0.451214	0.72	0.261	3.89158e-35	E13.5-6
P3h4	1.79092e-50	0.451158	0.683	0.196	5.01422e-46	E13.5-6
Tmed1	4.73722e-45	0.451055	0.77	0.281	1.32633e-40	E13.5-6
Rpl14	7.36617e-61	0.450818	1	1	2.06238e-56	E13.5-6
Rps16	6.9942e-56	0.450568	1	0.999	1.95824e-51	E13.5-6
Mpzl1	3.06124e-25	0.449554	0.925	0.708	8.57085e-21	E13.5-6
Rps14	1.74015e-54	0.449531	1	0.999	4.87207e-50	E13.5-6
Dcdc2a	5.28044e-138	0.44926	0.54	0.022	1.47842e-133	E13.5-6
Gm10073	2.41168e-31	0.448363	0.888	0.507	6.75221e-27	E13.5-6
Nes	1.53227e-83	0.44804	0.584	0.072	4.29004e-79	E13.5-6
Hexa	3.89398e-33	0.447938	0.826	0.418	1.09024e-28	E13.5-6
Rps27rt	1.63997e-25	0.447844	0.963	0.76	4.59159e-21	E13.5-6
Snx21	3.98454e-44	0.447604	0.683	0.221	1.11559e-39	E13.5-6
Fmo1	4.93777e-119	0.447309	0.379	0.006	1.38248e-114	E13.5-6
Fat1	3.19456e-96	0.447245	0.571	0.057	8.94413e-92	E13.5-6
Sdc1	4.765e-37	0.446907	0.596	0.201	1.3341e-32	E13.5-6
Sept9	1.29792e-30	0.446277	0.882	0.552	3.63392e-26	E13.5-6
Rfc1	5.05051e-43	0.44592	0.652	0.209	1.41404e-38	E13.5-6
Mrfap1	2.62719e-38	0.444318	1	0.973	7.35559e-34	E13.5-6
Tbrg1	2.83122e-25	0.444035	0.857	0.594	7.92685e-21	E13.5-6
Nr2f6	5.21679e-36	0.442081	0.733	0.3	1.4606e-31	E13.5-6
Echdc2	8.21109e-130	0.440546	0.528	0.024	2.29894e-125	E13.5-6
Bcap31	4.00277e-27	0.43986	0.814	0.48	1.12069e-22	E13.5-6
Qk	6.85677e-35	0.439811	0.634	0.22	1.91976e-30	E13.5-6
Fxyd1	2.18476e-147	0.439216	0.491	0.01	6.11688e-143	E13.5-6
Suclg2	5.83915e-121	0.439072	0.596	0.043	1.63484e-116	E13.5-6
Tpd52l1	1.28856e-34	0.438792	0.602	0.21	3.60771e-30	E13.5-6
Ctnna1	2.82233e-49	0.438745	0.683	0.193	7.90196e-45	E13.5-6
2610001J05Rik	4.14159e-25	0.437476	0.826	0.497	1.15956e-20	E13.5-6
Mgst1	1.51142e-94	0.437333	0.516	0.043	4.23168e-90	E13.5-6
Creg1	3.60889e-94	0.437123	0.59	0.064	1.01042e-89	E13.5-6
Rpap3	4.92734e-31	0.436394	0.733	0.338	1.37956e-26	E13.5-6
Pttg1	3.47712e-73	0.436109	0.64	0.112	9.73523e-69	E13.5-6
Arhgap31	1.7788e-149	0.436089	0.553	0.019	4.98027e-145	E13.5-6
Pdia3	5.26621e-24	0.435909	0.981	0.859	1.47443e-19	E13.5-6
Rpl23	8.16588e-53	0.434537	1	0.999	2.28628e-48	E13.5-6
Dact1	5.81806e-33	0.434129	0.677	0.273	1.62894e-28	E13.5-6
Hexim1	3.79763e-50	0.43361	0.665	0.176	1.06326e-45	E13.5-6
Magt1	2.62449e-72	0.432335	0.59	0.092	7.34805e-68	E13.5-6
Limd2	1.77602e-24	0.432263	0.963	0.831	4.97251e-20	E13.5-6
Pgd	1.60039e-27	0.431869	0.839	0.497	4.48076e-23	E13.5-6
Plod1	1.0694e-155	0.430187	0.553	0.016	2.99411e-151	E13.5-6
Tm4sf1	1.08377e-136	0.429725	0.416	0.005	3.03435e-132	E13.5-6
Tns1	2.78611e-95	0.429382	0.534	0.05	7.80056e-91	E13.5-6
Phlda3	6.65367e-71	0.429311	0.596	0.096	1.86289e-66	E13.5-6
Slc9a3r2	1.01107e-39	0.428207	0.615	0.193	2.83078e-35	E13.5-6
Gaa	2.09043e-31	0.428182	0.733	0.337	5.85277e-27	E13.5-6
Rest	2.67954e-111	0.427179	0.522	0.034	7.50218e-107	E13.5-6
Degs1	1.38185e-32	0.425744	0.702	0.288	3.86891e-28	E13.5-6
Nudcd2	9.15265e-29	0.424861	0.758	0.38	2.56256e-24	E13.5-6
Rbbp7	5.40723e-22	0.424515	0.876	0.637	1.51392e-17	E13.5-6
Dse	1.80936e-84	0.423744	0.578	0.072	5.06584e-80	E13.5-6
Chmp4b	1.635e-26	0.423111	0.957	0.777	4.57767e-22	E13.5-6
Kcnq1ot1	8.76709e-12	0.422588	0.814	0.654	2.45461e-07	E13.5-6
Fam64a	5.01632e-08	0.422022	0.217	0.093	0.00140447	E13.5-6
Sec24d	3.06732e-168	0.421908	0.553	0.012	8.58787e-164	E13.5-6
Cr1l	3.60624e-51	0.421813	0.584	0.137	1.00968e-46	E13.5-6
Sfrp1	1.36895e-49	0.421764	0.534	0.114	3.8328e-45	E13.5-6
Coro1b	6.2478e-26	0.421537	0.795	0.466	1.74926e-21	E13.5-6
Frem1	3.97921e-139	0.421394	0.453	0.009	1.1141e-134	E13.5-6
Qsox1	1.8686e-50	0.419503	0.584	0.135	5.23172e-46	E13.5-6
Rps13	9.64336e-53	0.419356	1	0.998	2.69995e-48	E13.5-6
Rpl7	2.2469e-58	0.419268	1	0.999	6.29088e-54	E13.5-6
Tmed9	4.48908e-28	0.418684	0.981	0.803	1.25685e-23	E13.5-6
Pdia4	6.01876e-31	0.418295	0.789	0.382	1.68513e-26	E13.5-6
Srpx2	2.25108e-148	0.417984	0.429	0.003	6.30256e-144	E13.5-6
Rps5	1.30924e-50	0.417952	1	0.999	3.6656e-46	E13.5-6
Tob1	6.61971e-34	0.417837	0.683	0.255	1.85339e-29	E13.5-6
Snx3	3.51347e-28	0.416736	0.981	0.768	9.83702e-24	E13.5-6
Rps28	9.47229e-47	0.416668	1	0.996	2.65205e-42	E13.5-6
Slc39a1	9.01999e-37	0.415678	0.528	0.147	2.52542e-32	E13.5-6
Creb3l2	6.32858e-148	0.415264	0.491	0.01	1.77188e-143	E13.5-6
Acaa1a	2.53406e-28	0.413903	0.863	0.505	7.09486e-24	E13.5-6
Rpl18a	1.51599e-51	0.412016	1	1	4.24448e-47	E13.5-6
Tmem37	9.50852e-158	0.41139	0.46	0.004	2.6622e-153	E13.5-6
Tmem119	4.80305e-139	0.41113	0.416	0.004	1.34476e-134	E13.5-6
Rpl12	1.32329e-34	0.410675	1	0.976	3.70496e-30	E13.5-6
Cmc2	9.76922e-31	0.410132	0.646	0.27	2.73519e-26	E13.5-6
Npm1	3.36431e-41	0.410085	1	0.998	9.4194e-37	E13.5-6
Gins2	9.22711e-74	0.410068	0.41	0.035	2.58341e-69	E13.5-6
Socs3	1.77502e-70	0.409732	0.435	0.043	4.96971e-66	E13.5-6
Ptgr1	2.52721e-129	0.409707	0.447	0.012	7.07567e-125	E13.5-6
Rps23	2.77918e-50	0.409449	1	1	7.78116e-46	E13.5-6
Lpcat3	1.55461e-50	0.408046	0.621	0.151	4.35259e-46	E13.5-6
Sipa1	1.46808e-72	0.407668	0.547	0.076	4.11032e-68	E13.5-6
Gm10837	9.46555e-112	0.407395	0.472	0.023	2.65016e-107	E13.5-6
Cdca8	1.55773e-14	0.407091	0.236	0.07	4.36132e-10	E13.5-6
Csrp1	6.57368e-119	0.406923	0.503	0.024	1.8405e-114	E13.5-6
Ndufa13	9.45743e-32	0.405663	1	0.952	2.64789e-27	E13.5-6
Ogn	2.84239e-61	0.40459	0.205	0.004	7.95814e-57	E13.5-6
Nenf	6.53373e-22	0.404422	0.988	0.856	1.82931e-17	E13.5-6
Chsy1	3.33669e-58	0.404121	0.584	0.116	9.34205e-54	E13.5-6
Ssr1	1.1709e-22	0.403667	0.87	0.614	3.27828e-18	E13.5-6
Shisa5	1.60626e-30	0.402975	0.745	0.354	4.49721e-26	E13.5-6
Pbxip1	1.32887e-139	0.402573	0.497	0.014	3.72058e-135	E13.5-6
Tmem39a	9.77208e-65	0.402407	0.578	0.1	2.73599e-60	E13.5-6
Pros1	2.67942e-149	0.402121	0.491	0.01	7.50185e-145	E13.5-6
Dkk3	6.6981e-137	0.401031	0.484	0.013	1.87533e-132	E13.5-6
Jag1	2.99021e-88	0.400929	0.441	0.031	8.372e-84	E13.5-6
Lockd	1.43212e-62	0.400818	0.236	0.008	4.00964e-58	E13.5-6
Col9a2	1.01372e-25	0.400762	0.41	0.116	2.8382e-21	E13.5-6
Rpl9	5.95367e-55	0.400493	1	0.999	1.66691e-50	E13.5-6
Hmbs	2.1374e-31	0.400277	0.72	0.325	5.98428e-27	E13.5-6
Il6st	6.15207e-62	0.399615	0.509	0.079	1.72246e-57	E13.5-6
Rpl35a	3.05591e-47	0.399177	1	1	8.55593e-43	E13.5-6
Casp6	1.36726e-62	0.398668	0.609	0.115	3.82805e-58	E13.5-6
Nfic	8.12794e-50	0.398114	0.559	0.123	2.27566e-45	E13.5-6
Rpl41	1.61232e-51	0.398088	1	1	4.51419e-47	E13.5-6
Comt	2.06358e-17	0.397446	0.907	0.758	5.7776e-13	E13.5-6
Ptpn14	6.60335e-144	0.397399	0.522	0.017	1.84881e-139	E13.5-6
Crispld2	1.08543e-102	0.397354	0.348	0.008	3.03898e-98	E13.5-6
Ccdc102a	2.12425e-144	0.397297	0.435	0.005	5.94748e-140	E13.5-6
Serinc3	6.28085e-23	0.395599	0.925	0.643	1.75851e-18	E13.5-6
Ctnnb1	2.60515e-26	0.394706	1	0.858	7.29389e-22	E13.5-6
Hsd17b10	1.63156e-20	0.394701	0.913	0.634	4.56804e-16	E13.5-6
Tmem9	3.00718e-24	0.393823	0.907	0.647	8.41949e-20	E13.5-6
Ddb1	4.89791e-22	0.393058	0.975	0.762	1.37132e-17	E13.5-6
Cenpf	2.23874e-33	0.393013	0.199	0.018	6.26802e-29	E13.5-6
Obsl1	4.79704e-55	0.392536	0.59	0.127	1.34307e-50	E13.5-6
Sgce	6.97866e-28	0.392196	0.783	0.39	1.95389e-23	E13.5-6
Rps3	1.32893e-44	0.391937	1	0.999	3.72073e-40	E13.5-6
Frmd6	9.37069e-136	0.391847	0.484	0.014	2.62361e-131	E13.5-6
Cryz	2.5868e-50	0.390768	0.509	0.101	7.24253e-46	E13.5-6
Smc2	1.65425e-15	0.39058	0.484	0.232	4.63156e-11	E13.5-6
Chmp2b	3.59344e-45	0.39024	0.677	0.208	1.00609e-40	E13.5-6
Chchd7	5.37084e-24	0.39023	0.764	0.424	1.50373e-19	E13.5-6
Fdx1	5.36609e-39	0.389933	0.714	0.256	1.5024e-34	E13.5-6
Lhfpl2	2.14149e-97	0.389569	0.503	0.037	5.99575e-93	E13.5-6
Arap1	1.89196e-127	0.389496	0.46	0.013	5.29711e-123	E13.5-6
Rarb	2.76753e-96	0.388777	0.447	0.026	7.74853e-92	E13.5-6
Lage3	5.32549e-30	0.38868	0.783	0.385	1.49103e-25	E13.5-6
Fam212a	1.76449e-68	0.387652	0.516	0.073	4.94021e-64	E13.5-6
Nkx6-1	1.05176e-148	0.387584	0.447	0.005	2.94472e-144	E13.5-6
Rpl10a	3.18456e-41	0.38754	1	0.996	8.91614e-37	E13.5-6
Ccdc8	2.5902e-68	0.386902	0.571	0.09	7.25204e-64	E13.5-6
Mlec	1.53411e-31	0.386614	0.646	0.26	4.29521e-27	E13.5-6
Mid1ip1	2.81883e-16	0.386028	0.801	0.558	7.89216e-12	E13.5-6
Ephb4	1.22024e-172	0.385682	0.503	0.004	3.41643e-168	E13.5-6
Plod2	5.68457e-56	0.385376	0.534	0.1	1.59157e-51	E13.5-6
Hlf	5.10993e-127	0.385303	0.491	0.018	1.43068e-122	E13.5-6
Dlc1	2.15048e-133	0.385193	0.516	0.02	6.02091e-129	E13.5-6
Rnaseh2c	3.28745e-20	0.385063	0.646	0.33	9.20421e-16	E13.5-6
Nab2	9.16338e-135	0.384869	0.478	0.013	2.56556e-130	E13.5-6
Fam20c	2.58574e-17	0.383699	0.758	0.484	7.23956e-13	E13.5-6
Bmp4	5.37929e-146	0.382991	0.441	0.005	1.50609e-141	E13.5-6
Clic4	2.58631e-28	0.382637	0.696	0.315	7.24114e-24	E13.5-6
Tpp1	1.10096e-49	0.382273	0.54	0.113	3.08247e-45	E13.5-6
Snap23	2.62401e-76	0.382126	0.559	0.075	7.34671e-72	E13.5-6
Csrp2	1.34637e-19	0.381978	0.913	0.643	3.76956e-15	E13.5-6
Tex264	7.18912e-26	0.381358	0.764	0.391	2.01281e-21	E13.5-6
Tmem86a	4.83447e-66	0.381325	0.559	0.088	1.35356e-61	E13.5-6
Crispld1	4.01406e-89	0.380899	0.472	0.037	1.12386e-84	E13.5-6
Slc7a5	2.36723e-29	0.380439	0.509	0.166	6.62777e-25	E13.5-6
Slc48a1	8.44881e-22	0.379489	0.826	0.517	2.3655e-17	E13.5-6
Sdf4	3.6226e-20	0.379107	0.87	0.613	1.01426e-15	E13.5-6
Rpl17	7.9599e-39	0.378976	1	0.999	2.22861e-34	E13.5-6
Trim62	1.94621e-22	0.378216	0.559	0.235	5.44899e-18	E13.5-6
Bmpr1a	5.59553e-47	0.378059	0.615	0.157	1.56664e-42	E13.5-6
Wnt6	3.18354e-18	0.37767	0.261	0.069	8.91327e-14	E13.5-6
Bak1	5.78055e-37	0.377438	0.596	0.187	1.61844e-32	E13.5-6
Gstm2	7.93883e-139	0.376795	0.441	0.007	2.22271e-134	E13.5-6
Atp5o	2.79121e-22	0.376785	1	0.968	7.81483e-18	E13.5-6
Lamtor3	3.5645e-18	0.376765	0.845	0.606	9.97989e-14	E13.5-6
Kctd12	1.161e-42	0.376388	0.466	0.097	3.25057e-38	E13.5-6
Slc35b2	2.17639e-28	0.375882	0.652	0.278	6.09345e-24	E13.5-6
Lman2	9.60335e-28	0.375355	0.758	0.35	2.68875e-23	E13.5-6
Abracl	1.36014e-21	0.375058	0.863	0.58	3.80813e-17	E13.5-6
Hadhb	2.42086e-33	0.374104	0.702	0.281	6.77792e-29	E13.5-6
Col4a6	2.51824e-160	0.373957	0.472	0.004	7.05056e-156	E13.5-6
Tpt1	6.87868e-52	0.373799	1	0.999	1.92589e-47	E13.5-6
Hexb	3.30701e-63	0.373065	0.534	0.086	9.25897e-59	E13.5-6
Hmgb1	4.91953e-15	0.372769	1	0.998	1.37737e-10	E13.5-6
Map2k3	1.63115e-53	0.372491	0.565	0.119	4.56689e-49	E13.5-6
P2ry1	1.11586e-137	0.371873	0.484	0.013	3.12418e-133	E13.5-6
Lama4	9.05713e-140	0.371633	0.435	0.006	2.53582e-135	E13.5-6
Hist1h2bc	1.01073e-11	0.370839	0.329	0.131	2.82985e-07	E13.5-6
Mesdc2	1.14008e-26	0.370636	0.814	0.427	3.19201e-22	E13.5-6
Cnn3	2.98835e-15	0.370524	0.925	0.802	8.36679e-11	E13.5-6
Itsn1	3.53751e-19	0.370431	0.752	0.44	9.90432e-15	E13.5-6
Rps15	3.27829e-44	0.370031	1	0.998	9.17857e-40	E13.5-6
Rpl27a	7.01203e-40	0.370028	1	0.999	1.96323e-35	E13.5-6
Arhgef40	8.5186e-31	0.36959	0.665	0.254	2.38504e-26	E13.5-6
Fam132a	5.75862e-60	0.369338	0.503	0.08	1.6123e-55	E13.5-6
Bst2	6.6368e-67	0.369117	0.348	0.026	1.85817e-62	E13.5-6
Prdx5	2.02313e-22	0.368104	0.988	0.897	5.66436e-18	E13.5-6
Plin2	5.40881e-31	0.368077	0.677	0.277	1.51436e-26	E13.5-6
Lrp10	6.41298e-36	0.367561	0.671	0.233	1.79551e-31	E13.5-6
Ccdc34	6.26392e-14	0.367487	0.801	0.589	1.75377e-09	E13.5-6
Ppp1r15a	5.92432e-45	0.366099	0.509	0.111	1.65869e-40	E13.5-6
Timp2	3.20409e-22	0.365109	0.733	0.387	8.97082e-18	E13.5-6
Nudt4	3.66938e-16	0.364342	0.801	0.595	1.02735e-11	E13.5-6
Acadvl	1.36951e-42	0.364113	0.615	0.166	3.83436e-38	E13.5-6
Aurkb	7.79598e-65	0.364105	0.23	0.006	2.18272e-60	E13.5-6
Nusap1	1.22568e-47	0.364013	0.18	0.006	3.43166e-43	E13.5-6
Fam84a	3.11106e-34	0.363638	0.559	0.162	8.71033e-30	E13.5-6
Cyr61	3.52723e-98	0.363443	0.36	0.011	9.87555e-94	E13.5-6
Cdca3	1.06736e-31	0.36334	0.236	0.031	2.9884e-27	E13.5-6
Cmbl	4.7285e-73	0.362833	0.391	0.031	1.32389e-68	E13.5-6
Rapgef3	2.25775e-117	0.362632	0.46	0.018	6.32124e-113	E13.5-6
Fam46a	3.96617e-36	0.362461	0.466	0.106	1.11045e-31	E13.5-6
Mrgprf	1.41765e-145	0.361943	0.422	0.003	3.96915e-141	E13.5-6
Hebp2	6.64518e-32	0.361492	0.559	0.194	1.86052e-27	E13.5-6
Cyp7b1	2.0995e-140	0.361134	0.435	0.006	5.87819e-136	E13.5-6
Rer1	5.1584e-23	0.360598	0.981	0.819	1.44425e-18	E13.5-6
Anxa3	1.28053e-80	0.360507	0.317	0.012	3.58523e-76	E13.5-6
Col9a1	1.14746e-78	0.35963	0.348	0.018	3.21264e-74	E13.5-6
Lmna	1.31289e-31	0.3591	0.503	0.147	3.67584e-27	E13.5-6
Wfikkn2	6.33346e-134	0.358372	0.379	0.002	1.77324e-129	E13.5-6
Myadm	1.24761e-33	0.358277	0.627	0.223	3.49305e-29	E13.5-6
Ier5	5.57909e-28	0.358061	0.727	0.301	1.56203e-23	E13.5-6
Xist	4.00989e-06	0.357795	0.621	0.469	0.112269	E13.5-6
Gmnn	5.00793e-44	0.357396	0.348	0.05	1.40212e-39	E13.5-6
Tacc3	6.87917e-23	0.357172	0.236	0.045	1.92603e-18	E13.5-6
Trp53i13	2.06191e-67	0.356576	0.478	0.059	5.77294e-63	E13.5-6
Nr3c1	1.99396e-107	0.356372	0.472	0.024	5.58268e-103	E13.5-6
Tpx2	4.3953e-61	0.356179	0.248	0.01	1.2306e-56	E13.5-6
Sec61b	6.98843e-25	0.35612	0.988	0.941	1.95662e-20	E13.5-6
Lsm2	2.07653e-16	0.355835	0.82	0.609	5.81387e-12	E13.5-6
Hat1	3.98408e-34	0.355732	0.571	0.174	1.11546e-29	E13.5-6
Zeb2	4.02843e-83	0.355314	0.478	0.042	1.12788e-78	E13.5-6
Rplp2	9.36735e-43	0.35517	1	0.999	2.62267e-38	E13.5-6
Pygb	7.12575e-22	0.353658	0.615	0.292	1.99507e-17	E13.5-6
Cib1	2.04766e-41	0.353187	0.571	0.151	5.73305e-37	E13.5-6
Npm3	6.34551e-23	0.353032	0.733	0.383	1.77662e-18	E13.5-6
Adam15	1.18545e-37	0.352138	0.528	0.145	3.31901e-33	E13.5-6
Tcf7	1.89993e-127	0.351589	0.435	0.01	5.31942e-123	E13.5-6
Yipf3	1.3362e-17	0.350953	0.795	0.536	3.74109e-13	E13.5-6
Apoa2	1.79317e-70	0.350801	0.41	0.038	5.0205e-66	E13.5-6
Rnf130	1.70511e-40	0.350394	0.615	0.177	4.77397e-36	E13.5-6
Capns1	5.14114e-20	0.350268	0.988	0.845	1.43941e-15	E13.5-6
Dhrs4	3.3823e-55	0.349024	0.509	0.089	9.46976e-51	E13.5-6
Ntm	5.90848e-13	0.34836	0.702	0.451	1.65426e-08	E13.5-6
Plekhg2	3.52715e-56	0.348296	0.516	0.09	9.87532e-52	E13.5-6
Postn	1.84999e-103	0.347741	0.292	0.001	5.1796e-99	E13.5-6
Glo1	3.15514e-19	0.347018	0.851	0.578	8.83375e-15	E13.5-6
Rpl26	8.20308e-41	0.34664	1	0.998	2.2967e-36	E13.5-6
Rps19	4.1934e-37	0.346497	1	0.999	1.17407e-32	E13.5-6
Nde1	6.38792e-83	0.346182	0.435	0.032	1.78849e-78	E13.5-6
Snx17	5.95212e-20	0.345877	0.894	0.679	1.66647e-15	E13.5-6
Slc39a7	2.23775e-16	0.345783	0.839	0.568	6.26526e-12	E13.5-6
Arhgef1	9.56335e-37	0.345426	0.578	0.168	2.67755e-32	E13.5-6
Shfm1	2.44392e-26	0.34527	1	0.963	6.84249e-22	E13.5-6
Tsc22d4	4.62582e-34	0.345212	0.59	0.19	1.29514e-29	E13.5-6
Nudt9	4.226e-17	0.345127	0.764	0.506	1.1832e-12	E13.5-6
Rpl4	2.64411e-38	0.345069	1	1	7.40298e-34	E13.5-6
Lmf2	2.02474e-43	0.344884	0.553	0.133	5.66887e-39	E13.5-6
Nfatc4	9.92938e-116	0.344401	0.472	0.021	2.78003e-111	E13.5-6
Snx2	6.83195e-24	0.34395	0.752	0.392	1.91281e-19	E13.5-6
Lamb2	2.6044e-135	0.343831	0.453	0.01	7.2918e-131	E13.5-6
Ptpn13	2.14373e-80	0.343473	0.466	0.042	6.00202e-76	E13.5-6
Vgll4	7.07686e-45	0.343339	0.646	0.166	1.98138e-40	E13.5-6
C1qtnf6	4.06138e-144	0.343202	0.441	0.006	1.13711e-139	E13.5-6
Rrm1	2.32566e-24	0.343026	0.46	0.154	6.51137e-20	E13.5-6
Anpep	1.09295e-138	0.342853	0.398	0.002	3.06005e-134	E13.5-6
Scara5	2.62623e-127	0.342671	0.379	0.004	7.35292e-123	E13.5-6
Rpl23a	4.3763e-33	0.342629	1	0.997	1.22528e-28	E13.5-6
Kdelc2	9.4082e-125	0.34226	0.422	0.01	2.63411e-120	E13.5-6
Rps11	2.53623e-39	0.342221	1	1	7.10095e-35	E13.5-6
Rbm3	1.5203e-19	0.34206	1	0.968	4.25654e-15	E13.5-6
Rps2	1.78263e-26	0.34153	1	0.999	4.991e-22	E13.5-6
Actn1	3.56025e-47	0.341509	0.46	0.084	9.96799e-43	E13.5-6
Eml4	1.31829e-28	0.341249	0.708	0.299	3.69095e-24	E13.5-6
Adamts1	1.39816e-114	0.341105	0.373	0.007	3.91456e-110	E13.5-6
Zfp385a	5.53413e-26	0.340909	0.683	0.308	1.54944e-21	E13.5-6
Slc30a10	1.06723e-106	0.340129	0.441	0.02	2.98802e-102	E13.5-6
Rpl8	1.04507e-38	0.339399	1	0.999	2.92599e-34	E13.5-6
Tgif1	4.84347e-117	0.339292	0.404	0.01	1.35608e-112	E13.5-6
Slc38a4	9.44726e-135	0.339266	0.404	0.004	2.64504e-130	E13.5-6
Litaf	9.97183e-90	0.33906	0.447	0.031	2.79191e-85	E13.5-6
Nrep	1.28783e-15	0.338765	0.994	0.911	3.60567e-11	E13.5-6
Mydgf	2.02369e-19	0.338581	0.882	0.646	5.66594e-15	E13.5-6
Agpat2	7.18306e-129	0.338545	0.466	0.014	2.01111e-124	E13.5-6
Hjurp	1.56986e-08	0.33843	0.484	0.293	0.000439528	E13.5-6
H2-T22	2.82719e-87	0.338204	0.453	0.034	7.91557e-83	E13.5-6
Gga2	3.51483e-19	0.338153	0.708	0.4	9.84083e-15	E13.5-6
Stk39	3.78018e-15	0.337926	0.578	0.306	1.05837e-10	E13.5-6
Fzd6	3.36754e-157	0.337664	0.46	0.004	9.42845e-153	E13.5-6
Sumf2	9.04655e-28	0.33762	0.59	0.226	2.53285e-23	E13.5-6
Nradd	1.66692e-25	0.33755	0.671	0.283	4.66703e-21	E13.5-6
Bbx	2.46928e-37	0.336835	0.571	0.157	6.91349e-33	E13.5-6
Mxd4	2.21536e-16	0.336463	0.739	0.475	6.20255e-12	E13.5-6
Tyms	4.32153e-11	0.335983	0.335	0.152	1.20994e-06	E13.5-6
Mrc2	1.41397e-152	0.335562	0.435	0.002	3.95885e-148	E13.5-6
Rbms3	9.53273e-27	0.335536	0.609	0.241	2.66897e-22	E13.5-6
Dnajc1	5.59996e-40	0.335319	0.559	0.144	1.56788e-35	E13.5-6
Stt3b	1.30115e-20	0.335274	0.801	0.479	3.64295e-16	E13.5-6
Fam120a	7.09164e-39	0.334949	0.559	0.155	1.98552e-34	E13.5-6
Cd82	5.11693e-98	0.33458	0.354	0.01	1.43264e-93	E13.5-6
1500009L16Rik	2.13421e-16	0.334566	0.807	0.576	5.97535e-12	E13.5-6
Scube1	1.73406e-25	0.334098	0.534	0.191	4.85502e-21	E13.5-6
Zeb1	1.0928e-21	0.333283	0.677	0.346	3.05961e-17	E13.5-6
Fads3	2.26983e-42	0.332226	0.571	0.15	6.35507e-38	E13.5-6
Nme4	1.74216e-33	0.331968	0.559	0.176	4.87769e-29	E13.5-6
Golim4	1.1591e-38	0.331403	0.491	0.116	3.24523e-34	E13.5-6
Dnajb14	2.03744e-20	0.33121	0.658	0.341	5.70443e-16	E13.5-6
Tns3	2.49011e-94	0.331103	0.41	0.021	6.9718e-90	E13.5-6
Ccdc109b	1.60625e-33	0.330763	0.46	0.112	4.49718e-29	E13.5-6
Zfp536	8.34219e-47	0.33069	0.54	0.111	2.33565e-42	E13.5-6
Plscr3	3.38165e-18	0.330012	0.714	0.423	9.46793e-14	E13.5-6
Uqcrc1	1.10743e-19	0.329147	0.975	0.892	3.10059e-15	E13.5-6
Rps10	6.9793e-32	0.329044	1	0.996	1.95406e-27	E13.5-6
Anapc11	3.43283e-20	0.328302	0.975	0.897	9.61123e-16	E13.5-6
Flrt3	3.42097e-36	0.328117	0.516	0.13	9.57804e-32	E13.5-6
Gm8730	7.1904e-18	0.328002	0.913	0.665	2.01317e-13	E13.5-6
Gab1	6.91139e-46	0.327769	0.441	0.08	1.93505e-41	E13.5-6
Dennd2a	3.87136e-28	0.327255	0.578	0.204	1.0839e-23	E13.5-6
Mif4gd	1.98026e-83	0.327204	0.466	0.04	5.54434e-79	E13.5-6
Cobl	8.51024e-27	0.326952	0.484	0.159	2.3827e-22	E13.5-6
Txndc12	6.64273e-25	0.326784	0.764	0.373	1.85983e-20	E13.5-6
Hbp1	5.41355e-31	0.326237	0.615	0.217	1.51569e-26	E13.5-6
Itgb3bp	1.7016e-33	0.325754	0.534	0.158	4.76414e-29	E13.5-6
Mcm5	3.12597e-37	0.325314	0.298	0.042	8.7521e-33	E13.5-6
Cyb5r3	4.07829e-13	0.324974	0.876	0.718	1.14184e-08	E13.5-6
Tnc	6.7188e-97	0.324903	0.292	0.003	1.88113e-92	E13.5-6
Lrpap1	2.32208e-14	0.324495	0.814	0.569	6.50136e-10	E13.5-6
Tmem59	2.25294e-17	0.323716	0.981	0.875	6.30779e-13	E13.5-6
Tanc1	1.1448e-119	0.323519	0.422	0.012	3.20521e-115	E13.5-6
Loxl2	1.44617e-90	0.322865	0.447	0.031	4.04899e-86	E13.5-6
Elavl1	2.19027e-19	0.322582	0.857	0.575	6.13231e-15	E13.5-6
Csf1	1.49113e-119	0.321997	0.391	0.007	4.17486e-115	E13.5-6
Map3k6	3.61296e-56	0.321615	0.404	0.053	1.01156e-51	E13.5-6
Aprt	1.45924e-11	0.321565	0.894	0.735	4.08558e-07	E13.5-6
Atp5g2	4.49489e-26	0.321362	1	0.98	1.25848e-21	E13.5-6
Evi5	2.0397e-40	0.321251	0.578	0.152	5.71074e-36	E13.5-6
A2m	2.41486e-108	0.321167	0.36	0.007	6.76112e-104	E13.5-6
Rpl31	3.34642e-33	0.32116	1	1	9.3693e-29	E13.5-6
Mcm3	7.72493e-104	0.32105	0.317	0.004	2.16283e-99	E13.5-6
Fau	4.12259e-38	0.321008	1	0.999	1.15424e-33	E13.5-6
Triobp	1.38345e-31	0.32081	0.553	0.176	3.8734e-27	E13.5-6
Foxq1	5.59416e-99	0.320673	0.286	0.002	1.56625e-94	E13.5-6
Reck	2.1677e-70	0.320386	0.453	0.048	6.06912e-66	E13.5-6
Rspo3	5.67662e-34	0.320237	0.447	0.103	1.58934e-29	E13.5-6
Cenpm	1.49983e-55	0.32016	0.304	0.024	4.19923e-51	E13.5-6
Sh3gl1	1.02076e-24	0.319904	0.789	0.402	2.85793e-20	E13.5-6
Mylip	5.0809e-82	0.318904	0.416	0.03	1.42255e-77	E13.5-6
Klf2	5.58135e-72	0.318776	0.23	0.004	1.56267e-67	E13.5-6
Fbln2	1.38766e-124	0.317187	0.36	0.002	3.88517e-120	E13.5-6
Iah1	1.05574e-25	0.316901	0.621	0.253	2.95586e-21	E13.5-6
Gpr180	2.45017e-26	0.316051	0.627	0.253	6.85998e-22	E13.5-6
Rpl34	9.919e-33	0.315598	1	0.997	2.77712e-28	E13.5-6
Tgfbr3	5.32767e-126	0.315447	0.398	0.006	1.49164e-121	E13.5-6
Rora	1.23297e-59	0.315296	0.453	0.061	3.45208e-55	E13.5-6
Phactr2	1.01715e-58	0.314976	0.41	0.048	2.84782e-54	E13.5-6
Mbtps1	6.40884e-20	0.314893	0.634	0.306	1.79435e-15	E13.5-6
Slc35f5	4.03949e-35	0.314758	0.516	0.139	1.13098e-30	E13.5-6
Krcc1	5.84413e-28	0.314666	0.621	0.238	1.63624e-23	E13.5-6
Ccs	2.25013e-22	0.314611	0.646	0.307	6.29991e-18	E13.5-6
Fkbp14	1.19496e-57	0.314557	0.441	0.061	3.34566e-53	E13.5-6
Enpp1	1.10758e-108	0.314465	0.36	0.007	3.10099e-104	E13.5-6
S1pr2	4.54609e-44	0.313979	0.429	0.078	1.27281e-39	E13.5-6
Kpnb1	1.31386e-13	0.312786	0.832	0.647	3.67856e-09	E13.5-6
Bckdk	3.44758e-17	0.312545	0.677	0.387	9.65254e-13	E13.5-6
Sep15	7.13678e-20	0.312504	0.988	0.946	1.99815e-15	E13.5-6
Lims1	1.39282e-22	0.312493	0.696	0.333	3.89962e-18	E13.5-6
9530068E07Rik	4.56266e-18	0.312452	0.845	0.574	1.27745e-13	E13.5-6
Dcaf8	5.79003e-17	0.312265	0.634	0.334	1.62109e-12	E13.5-6
Acot1	1.11761e-92	0.312122	0.391	0.018	3.12909e-88	E13.5-6
Carnmt1	6.19038e-27	0.311958	0.547	0.203	1.73318e-22	E13.5-6
Trp53	2.21968e-20	0.31191	0.795	0.45	6.21467e-16	E13.5-6
Rpl30	2.79554e-27	0.311215	1	0.991	7.82697e-23	E13.5-6
Nsa2	1.30495e-16	0.3102	0.925	0.723	3.65361e-12	E13.5-6
Zfp703	5.94931e-43	0.310179	0.453	0.09	1.66569e-38	E13.5-6
Rps21	1.09459e-26	0.309427	1	0.994	3.06464e-22	E13.5-6
Rps26	5.69588e-26	0.309071	1	0.996	1.59473e-21	E13.5-6
Peli2	2.97291e-60	0.308931	0.447	0.057	8.32356e-56	E13.5-6
Cacna1g	2.76173e-69	0.30844	0.46	0.05	7.73229e-65	E13.5-6
Sdha	3.15378e-15	0.308348	0.882	0.668	8.82996e-11	E13.5-6
Pear1	1.06127e-115	0.308253	0.36	0.005	2.97134e-111	E13.5-6
Rpl10	2.12229e-30	0.307792	1	0.999	5.94198e-26	E13.5-6
Wnk4	4.50303e-84	0.307386	0.354	0.017	1.26076e-79	E13.5-6
Wnt9a	5.68075e-118	0.30702	0.354	0.004	1.5905e-113	E13.5-6
Ptdss2	1.32951e-15	0.306948	0.72	0.44	3.72236e-11	E13.5-6
Cryl1	3.22593e-83	0.306556	0.404	0.026	9.03195e-79	E13.5-6
Ikbip	5.9701e-46	0.306197	0.466	0.09	1.67151e-41	E13.5-6
Tm9sf2	2.85216e-19	0.306104	0.696	0.364	7.98547e-15	E13.5-6
Tipin	3.07618e-15	0.305503	0.509	0.245	8.6127e-11	E13.5-6
Ptch1	3.94221e-26	0.305457	0.497	0.162	1.10374e-21	E13.5-6
Spr	4.02706e-36	0.305084	0.522	0.144	1.1275e-31	E13.5-6
Mbnl2	2.6599e-31	0.304313	0.59	0.187	7.4472e-27	E13.5-6
Copa	5.05254e-17	0.304167	0.845	0.583	1.41461e-12	E13.5-6
Sepn1	1.41535e-16	0.304155	0.696	0.401	3.96269e-12	E13.5-6
Tmco1	1.97303e-14	0.303535	0.882	0.638	5.52408e-10	E13.5-6
Tmem256	3.22566e-16	0.303403	0.963	0.832	9.0312e-12	E13.5-6
Tsen34	6.13156e-17	0.303185	0.975	0.872	1.71671e-12	E13.5-6
Antxr1	1.2904e-99	0.30285	0.404	0.017	3.61286e-95	E13.5-6
Gusb	1.24934e-25	0.302834	0.54	0.198	3.4979e-21	E13.5-6
Eln	2.07325e-99	0.302149	0.335	0.007	5.80469e-95	E13.5-6
Tmem214	3.48841e-19	0.302147	0.602	0.292	9.76686e-15	E13.5-6
Hspb11	9.6094e-20	0.302061	0.783	0.442	2.69044e-15	E13.5-6
Pcx	2.43127e-58	0.301952	0.398	0.045	6.80708e-54	E13.5-6
Cdc16	2.09441e-13	0.301846	0.882	0.687	5.86392e-09	E13.5-6
Rpl21	5.17018e-34	0.301809	1	0.999	1.44755e-29	E13.5-6
Rnaset2b	1.08082e-52	0.301749	0.435	0.064	3.02608e-48	E13.5-6
Fam101a	1.15568e-71	0.30162	0.354	0.024	3.23567e-67	E13.5-6
Knstrn	1.54837e-46	0.301305	0.217	0.013	4.33511e-42	E13.5-6
Fbxo38	5.76383e-32	0.301279	0.528	0.158	1.61376e-27	E13.5-6
Rps24	7.69587e-35	0.301262	1	1	2.15469e-30	E13.5-6
Cdkn1a	5.21623e-23	0.301216	0.385	0.112	1.46044e-18	E13.5-6
Colgalt1	6.83802e-17	0.30059	0.652	0.355	1.91451e-12	E13.5-6
Lsp1	2.76352e-87	0.300506	0.398	0.023	7.7373e-83	E13.5-6
Tpd52l2	6.95566e-19	0.300456	0.845	0.518	1.94745e-14	E13.5-6
Efna4	1.2179e-58	0.300217	0.46	0.064	3.40987e-54	E13.5-6
Mpv17	4.28038e-17	0.300063	0.696	0.404	1.19842e-12	E13.5-6
Ccnd1	1.83591e-62	0.300017	0.286	0.016	5.14018e-58	E13.5-6
Mcm2	9.20585e-46	0.299778	0.373	0.054	2.57745e-41	E13.5-6
Gabarap	1.13657e-23	0.299216	1	0.994	3.18217e-19	E13.5-6
Bet1	8.7799e-25	0.299117	0.578	0.22	2.4582e-20	E13.5-6
Gnb4	3.63682e-16	0.298705	0.72	0.413	1.01824e-11	E13.5-6
D10Jhu81e	1.7188e-19	0.298678	0.677	0.355	4.81229e-15	E13.5-6
Slc35a4	4.0585e-26	0.298322	0.646	0.267	1.1363e-21	E13.5-6
Ctsa	1.37914e-20	0.29792	0.627	0.3	3.86131e-16	E13.5-6
Fam96a	1.1716e-15	0.297319	0.894	0.677	3.28023e-11	E13.5-6
Rab22a	1.43746e-15	0.296807	0.727	0.426	4.0246e-11	E13.5-6
Pbk	2.45933e-70	0.296277	0.236	0.005	6.88562e-66	E13.5-6
Adam10	1.5956e-15	0.296184	0.739	0.459	4.46737e-11	E13.5-6
Grhpr	9.77101e-26	0.296035	0.491	0.171	2.73569e-21	E13.5-6
Plk1	6.24746e-56	0.295723	0.18	0.003	1.74916e-51	E13.5-6
Josd2	1.09079e-21	0.295226	0.658	0.295	3.054e-17	E13.5-6
Erlec1	4.51999e-19	0.295092	0.64	0.314	1.26551e-14	E13.5-6
Mrpl17	1.1381e-16	0.294988	0.863	0.593	3.18646e-12	E13.5-6
Mrps16	5.23506e-17	0.294944	0.882	0.618	1.46571e-12	E13.5-6
Lima1	7.01584e-42	0.294864	0.422	0.078	1.96429e-37	E13.5-6
Sar1a	3.68413e-15	0.294844	0.919	0.698	1.03148e-10	E13.5-6
Gxylt2	9.95617e-111	0.29481	0.366	0.007	2.78753e-106	E13.5-6
Mcm4	4.91951e-43	0.294806	0.373	0.057	1.37736e-38	E13.5-6
Prickle1	3.63651e-47	0.294249	0.41	0.067	1.01815e-42	E13.5-6
Ldha	6.26367e-15	0.294208	0.913	0.67	1.7537e-10	E13.5-6
Metrn	1.11089e-37	0.294138	0.466	0.103	3.11026e-33	E13.5-6
Adgra2	9.25426e-125	0.293668	0.373	0.004	2.59101e-120	E13.5-6
Dek	3.10008e-09	0.293654	0.708	0.531	8.67961e-05	E13.5-6
Spcs1	1.63266e-16	0.293223	0.988	0.873	4.57113e-12	E13.5-6
Esd	2.35321e-15	0.292454	0.957	0.857	6.58852e-11	E13.5-6
Pdk3	1.00718e-39	0.292063	0.516	0.123	2.8199e-35	E13.5-6
Cdk2	2.60467e-118	0.291988	0.404	0.009	7.29254e-114	E13.5-6
Cst3	3.53771e-14	0.291984	1	0.909	9.90488e-10	E13.5-6
Wasf2	5.88457e-37	0.291761	0.484	0.117	1.64756e-32	E13.5-6
Pold2	3.91988e-29	0.291705	0.596	0.218	1.09749e-24	E13.5-6
Arl1	2.62831e-11	0.291625	0.888	0.78	7.35873e-07	E13.5-6
Chpt1	9.23618e-45	0.291431	0.391	0.06	2.58594e-40	E13.5-6
Smarcd2	1.40571e-43	0.291286	0.435	0.08	3.9357e-39	E13.5-6
Foxo1	3.88505e-35	0.291155	0.447	0.102	1.08774e-30	E13.5-6
Eif4e2	4.67714e-16	0.291149	0.901	0.634	1.3095e-11	E13.5-6
Renbp	8.85264e-111	0.290953	0.373	0.008	2.47856e-106	E13.5-6
Rnaset2a	1.39236e-58	0.290948	0.435	0.056	3.89834e-54	E13.5-6
Rpa2	7.7911e-25	0.289872	0.435	0.133	2.18135e-20	E13.5-6
Dnajc3	8.23261e-27	0.289783	0.497	0.163	2.30497e-22	E13.5-6
Tm9sf3	5.63202e-17	0.289496	0.907	0.643	1.57685e-12	E13.5-6
Ece1	3.23567e-32	0.289366	0.478	0.13	9.05924e-28	E13.5-6
Hspg2	1.69314e-115	0.28933	0.385	0.008	4.74045e-111	E13.5-6
Prkd3	1.94411e-42	0.28917	0.472	0.096	5.44313e-38	E13.5-6
Tmem55a	2.58193e-17	0.289037	0.739	0.448	7.2289e-13	E13.5-6
9030624J02Rik	1.40982e-11	0.287606	0.658	0.441	3.94721e-07	E13.5-6
Slc6a9	8.59519e-76	0.287482	0.354	0.021	2.40648e-71	E13.5-6
Fam43a	3.46902e-107	0.287447	0.373	0.009	9.71255e-103	E13.5-6
D630033O11Rik	2.67952e-87	0.287298	0.248	0.001	7.50212e-83	E13.5-6
Tmod3	1.03909e-24	0.286979	0.609	0.25	2.90924e-20	E13.5-6
Slc35a2	1.20708e-25	0.286229	0.59	0.229	3.37958e-21	E13.5-6
Gulp1	2.092e-109	0.285599	0.391	0.011	5.85718e-105	E13.5-6
Chrd	2.09163e-49	0.285416	0.429	0.067	5.85614e-45	E13.5-6
Rnase4	3.4058e-65	0.285362	0.348	0.027	9.53556e-61	E13.5-6
Decr1	1.24369e-27	0.285241	0.547	0.191	3.48207e-23	E13.5-6
Papd4	1.29059e-33	0.284911	0.522	0.143	3.61339e-29	E13.5-6
Rpsa	3.59578e-27	0.284538	1	1	1.00675e-22	E13.5-6
Tor2a	1.96377e-18	0.284341	0.621	0.312	5.49817e-14	E13.5-6
B4galt4	3.95882e-28	0.28432	0.534	0.172	1.10839e-23	E13.5-6
Iqgap1	9.43872e-18	0.284112	0.503	0.223	2.64265e-13	E13.5-6
Plbd2	6.16741e-37	0.283932	0.509	0.128	1.72675e-32	E13.5-6
Rpl18	1.20043e-29	0.283926	1	0.999	3.36097e-25	E13.5-6
Rad23a	5.0942e-14	0.283454	0.689	0.406	1.42627e-09	E13.5-6
Bad	1.74467e-14	0.283441	0.826	0.605	4.88473e-10	E13.5-6
Aamdc	2.65659e-26	0.28342	0.634	0.259	7.43793e-22	E13.5-6
Cnih4	4.7763e-21	0.283339	0.677	0.323	1.33727e-16	E13.5-6
Ebpl	1.81972e-15	0.283074	0.758	0.47	5.09486e-11	E13.5-6
Fgfr1	2.09421e-16	0.282637	0.627	0.324	5.86336e-12	E13.5-6
Mfsd1	2.81685e-25	0.282283	0.472	0.153	7.88663e-21	E13.5-6
Sec31a	1.25997e-17	0.2822	0.702	0.383	3.52767e-13	E13.5-6
Efr3a	1.66426e-25	0.282152	0.516	0.18	4.6596e-21	E13.5-6
Ppfibp1	2.94277e-45	0.282135	0.472	0.093	8.23916e-41	E13.5-6
Eif3k	1.4039e-19	0.28204	1	0.976	3.93063e-15	E13.5-6
Atraid	8.71207e-12	0.281984	0.863	0.683	2.43921e-07	E13.5-6
Emc3	5.21516e-16	0.281894	0.826	0.538	1.46014e-11	E13.5-6
Xylt2	2.32768e-50	0.281705	0.435	0.069	6.51705e-46	E13.5-6
Jak1	1.63883e-20	0.281548	0.596	0.261	4.58838e-16	E13.5-6
Gltp	7.13612e-24	0.281486	0.528	0.193	1.99797e-19	E13.5-6
Mki67	2.07103e-44	0.281436	0.224	0.015	5.79847e-40	E13.5-6
Dnajc9	2.87523e-09	0.280554	0.609	0.428	8.05007e-05	E13.5-6
Prkcsh	3.42863e-14	0.28025	0.783	0.551	9.59948e-10	E13.5-6
Rps25	2.68695e-24	0.280051	1	0.995	7.52292e-20	E13.5-6
Dnajb11	1.17861e-15	0.279104	0.832	0.592	3.29986e-11	E13.5-6
Sh3d19	3.11927e-37	0.279049	0.441	0.097	8.73334e-33	E13.5-6
Rps17	7.02271e-28	0.278984	1	1	1.96622e-23	E13.5-6
Ecscr	2.25682e-93	0.278906	0.311	0.006	6.31865e-89	E13.5-6
Nsmce4a	2.04328e-11	0.278845	0.758	0.557	5.72078e-07	E13.5-6
App	6.10959e-17	0.278246	0.994	0.872	1.71056e-12	E13.5-6
Gprc5c	3.14188e-120	0.277833	0.366	0.004	8.79664e-116	E13.5-6
Glul	1.6962e-12	0.277798	0.745	0.515	4.74902e-08	E13.5-6
Tjp2	1.91543e-66	0.27777	0.348	0.026	5.36283e-62	E13.5-6
Rell1	1.30289e-35	0.277758	0.416	0.087	3.64782e-31	E13.5-6
Usp1	7.84743e-27	0.277676	0.422	0.119	2.19712e-22	E13.5-6
Samm50	3.81018e-17	0.277364	0.745	0.422	1.06677e-12	E13.5-6
Orai3	1.92811e-46	0.277052	0.435	0.073	5.39832e-42	E13.5-6
Srsf9	4.2777e-16	0.276909	0.783	0.489	1.19767e-11	E13.5-6
Vwa1	1.03577e-52	0.276886	0.329	0.034	2.89994e-48	E13.5-6
Tspan9	7.18662e-53	0.276836	0.398	0.051	2.01211e-48	E13.5-6
Zfp362	2.3309e-23	0.276594	0.602	0.249	6.52604e-19	E13.5-6
Cnpy4	1.7295e-30	0.276508	0.509	0.147	4.84226e-26	E13.5-6
Bmp2	1.37162e-106	0.276419	0.342	0.006	3.84026e-102	E13.5-6
Ifnar2	2.31371e-38	0.276311	0.441	0.094	6.47794e-34	E13.5-6
Ncln	6.92574e-20	0.27566	0.559	0.24	1.93907e-15	E13.5-6
Qars	6.75595e-16	0.275601	0.764	0.453	1.89153e-11	E13.5-6
Hsd17b4	2.74692e-18	0.275558	0.627	0.309	7.69082e-14	E13.5-6
Snx1	1.668e-19	0.27554	0.652	0.306	4.67007e-15	E13.5-6
Rap1a	5.32274e-14	0.275402	0.87	0.642	1.49026e-09	E13.5-6
Galnt1	2.91378e-17	0.275266	0.671	0.35	8.158e-13	E13.5-6
Tead1	1.37321e-20	0.275233	0.565	0.242	3.84471e-16	E13.5-6
Srpr	6.32303e-17	0.275009	0.615	0.311	1.77032e-12	E13.5-6
Tmem14c	7.60096e-13	0.274855	0.907	0.745	2.12812e-08	E13.5-6
Nit2	1.27394e-19	0.274821	0.571	0.262	3.56678e-15	E13.5-6
Lrrk1	1.3857e-95	0.274765	0.36	0.012	3.87967e-91	E13.5-6
Dync2li1	7.69542e-27	0.274628	0.466	0.141	2.15457e-22	E13.5-6
Athl1	1.53133e-107	0.274614	0.348	0.006	4.28743e-103	E13.5-6
Dtymk	2.76527e-13	0.274316	0.789	0.555	7.74221e-09	E13.5-6
Atox1	1.05627e-13	0.274217	0.975	0.877	2.95733e-09	E13.5-6
Pmf1	1.90834e-20	0.274182	0.441	0.155	5.34297e-16	E13.5-6
Sdf2	1.18971e-12	0.273468	0.882	0.693	3.33096e-08	E13.5-6
Adcy5	7.90023e-26	0.273218	0.466	0.151	2.21191e-21	E13.5-6
Tln2	1.88807e-40	0.272929	0.354	0.056	5.28621e-36	E13.5-6
Clmp	5.9399e-14	0.272756	0.863	0.621	1.66305e-09	E13.5-6
Aplp2	5.54477e-14	0.272687	0.851	0.632	1.55243e-09	E13.5-6
Cgnl1	3.99265e-120	0.272263	0.366	0.004	1.11786e-115	E13.5-6
Eng	2.75347e-113	0.271637	0.342	0.004	7.70916e-109	E13.5-6
Gorasp2	1.81396e-09	0.271636	0.752	0.561	5.07874e-05	E13.5-6
Necap2	7.2515e-26	0.271123	0.46	0.145	2.03027e-21	E13.5-6
Tle3	5.6003e-19	0.27102	0.596	0.255	1.56797e-14	E13.5-6
Rps12-ps3	2.8173e-16	0.270893	0.714	0.404	7.88788e-12	E13.5-6
Taf6l	4.5166e-17	0.270387	0.621	0.312	1.26456e-12	E13.5-6
Pxn	2.78426e-30	0.269614	0.453	0.123	7.79537e-26	E13.5-6
Cenpe	3.78974e-42	0.269596	0.186	0.01	1.06105e-37	E13.5-6
Thop1	2.23509e-15	0.269556	0.497	0.242	6.25781e-11	E13.5-6
Kit	2.62506e-56	0.269266	0.41	0.05	7.34963e-52	E13.5-6
Mob3b	3.59972e-52	0.269154	0.398	0.053	1.00785e-47	E13.5-6
Timp1	5.47982e-98	0.269138	0.311	0.005	1.53424e-93	E13.5-6
Aldh2	4.09389e-12	0.269074	0.745	0.506	1.14621e-07	E13.5-6
Lysmd2	2.0565e-22	0.269037	0.553	0.222	5.75779e-18	E13.5-6
Eif3m	2.35173e-12	0.268196	0.925	0.835	6.58437e-08	E13.5-6
Gnas	6.55886e-27	0.267814	1	0.999	1.83635e-22	E13.5-6
mt-Nd5	4.89587e-13	0.267469	0.969	0.834	1.37075e-08	E13.5-6
Klhl22	2.68646e-13	0.267378	0.609	0.348	7.52155e-09	E13.5-6
Rps6ka4	4.91874e-53	0.267212	0.373	0.046	1.37715e-48	E13.5-6
Glt8d1	4.83333e-13	0.266861	0.596	0.348	1.35324e-08	E13.5-6
Btg2	1.7803e-43	0.266852	0.435	0.076	4.98447e-39	E13.5-6
Slc43a3	1.50545e-94	0.266469	0.292	0.004	4.21497e-90	E13.5-6
Tmpo	2.05602e-05	0.266382	0.776	0.718	0.575646	E13.5-6
Pcbd2	1.89956e-26	0.266249	0.578	0.212	5.31838e-22	E13.5-6
Cln6	3.29196e-40	0.266248	0.36	0.059	9.21684e-36	E13.5-6
Snta1	3.07876e-52	0.266108	0.391	0.05	8.61992e-48	E13.5-6
Eci1	4.80839e-26	0.266094	0.522	0.174	1.34625e-21	E13.5-6
Sat1	2.93141e-11	0.266054	0.578	0.362	8.20735e-07	E13.5-6
Mprip	2.20333e-13	0.265823	0.776	0.53	6.16889e-09	E13.5-6
Mtap	4.33378e-57	0.265598	0.385	0.043	1.21337e-52	E13.5-6
Adamts7	4.23405e-65	0.265381	0.354	0.028	1.18545e-60	E13.5-6
[truncated: 1,016 more rows]

## Sheet: E15.5
Figure 4-Source Data 2 (corresponding to Figure4). Feature genes that define each
subcluster at each of the six developmental stages
Data are sorted from highest to lowest for each subcluster by average log fold-change > 0.25 (avg_logFC)
of gene expression levels in the indicated subcluster relative to all other subclusters.
pct.1, Percentage of cells in the indicated subcluster with significant differential gene expression
pct.2, Percentage of cells in all other subclusters with significant differential gene expression
p-val, p-value
p val adj, adjusted p value for multiple comparisons
The Wilcoxin test was performed to identify differentially expressed genes in each subcluster
Gene	p_val	avg_logFC	pct.1	pct.2	p_val_adj	SubCluster
Otp	9.84008e-284	2.37967	0.947	0.165	2.75503e-279	E15.5-1
Sst	8.75144e-42	2.06608	0.284	0.069	2.45023e-37	E15.5-1
Npy	4.6756e-46	1.82109	0.353	0.104	1.30907e-41	E15.5-1
Dlk1	1.86361e-159	1.38185	0.987	0.642	5.21774e-155	E15.5-1
Cited1	3.82852e-104	1.27907	0.84	0.413	1.07191e-99	E15.5-1
Calcr	2.16039e-103	0.969831	0.553	0.119	6.04866e-99	E15.5-1
Peg10	1.99147e-110	0.916952	0.927	0.584	5.57572e-106	E15.5-1
Agrp	1.02859e-52	0.851044	0.242	0.031	2.87984e-48	E15.5-1
Tbca	4.97434e-138	0.841114	0.993	0.983	1.39272e-133	E15.5-1
Isl1	1.54982e-77	0.796291	0.96	0.58	4.33918e-73	E15.5-1
Nap1l5	2.06806e-81	0.7373	0.982	0.876	5.79016e-77	E15.5-1
Cbln4	5.0782e-50	0.684008	0.387	0.111	1.42179e-45	E15.5-1
Tshz2	2.31724e-60	0.621008	0.722	0.388	6.48781e-56	E15.5-1
Ecel1	5.48815e-60	0.603335	0.484	0.154	1.53657e-55	E15.5-1
Ap3b1	1.01456e-78	0.601149	0.558	0.176	2.84057e-74	E15.5-1
2900055J20Rik	4.89534e-57	0.601121	0.587	0.251	1.3706e-52	E15.5-1
Ntm	1.66879e-50	0.600478	0.816	0.529	4.67228e-46	E15.5-1
Six6	2.12237e-60	0.562663	0.867	0.472	5.9422e-56	E15.5-1
Magel2	2.18586e-38	0.511728	0.867	0.679	6.11998e-34	E15.5-1
Cpa4	8.93889e-54	0.506285	0.389	0.099	2.50271e-49	E15.5-1
Zdbf2	7.63695e-51	0.505843	0.88	0.709	2.13819e-46	E15.5-1
Klhdc8b	2.37276e-54	0.493217	0.947	0.784	6.64326e-50	E15.5-1
Slc32a1	2.16338e-86	0.488914	0.5	0.097	6.05703e-82	E15.5-1
Peg3	1.75756e-46	0.471625	0.98	0.888	4.92081e-42	E15.5-1
Hap1	1.56729e-56	0.463112	0.978	0.909	4.38811e-52	E15.5-1
Rrad	1.76783e-37	0.454578	0.48	0.204	4.94957e-33	E15.5-1
Tox2	8.66308e-41	0.443576	0.84	0.667	2.42549e-36	E15.5-1
Gpx3	1.57522e-14	0.426353	0.46	0.307	4.41031e-10	E15.5-1
Syt1	5.2567e-34	0.418226	0.804	0.575	1.47177e-29	E15.5-1
Ndn	2.02884e-09	0.412323	0.86	0.849	5.68036e-05	E15.5-1
Nrxn3	6.31675e-37	0.407552	0.649	0.353	1.76856e-32	E15.5-1
Efna5	6.00328e-23	0.390492	0.829	0.668	1.6808e-18	E15.5-1
Klhdc10	6.35088e-32	0.390114	0.678	0.481	1.77812e-27	E15.5-1
Wbp5	7.04479e-50	0.377516	0.991	0.976	1.9724e-45	E15.5-1
Mest	3.40665e-22	0.370314	0.591	0.394	9.53793e-18	E15.5-1
Resp18	3.57243e-11	0.367107	0.76	0.704	1.00021e-06	E15.5-1
Cntfr	7.06963e-23	0.361344	0.609	0.424	1.97935e-18	E15.5-1
Baiap3	9.90051e-39	0.357446	0.504	0.217	2.77195e-34	E15.5-1
Jund	4.2642e-27	0.356505	0.978	0.964	1.19389e-22	E15.5-1
Celf3	1.98374e-31	0.347907	0.92	0.844	5.55408e-27	E15.5-1
Jun	6.97619e-15	0.343502	0.771	0.646	1.95319e-10	E15.5-1
Lmo1	5.85921e-31	0.340597	0.378	0.146	1.64046e-26	E15.5-1
Gad1	5.08255e-41	0.339838	0.402	0.128	1.42301e-36	E15.5-1
Dusp8	2.57926e-15	0.337979	0.658	0.55	7.22141e-11	E15.5-1
Hmgn3	4.04439e-27	0.335751	0.842	0.678	1.13235e-22	E15.5-1
Fam183b	4.08404e-26	0.335633	0.644	0.389	1.14345e-21	E15.5-1
Hnrnpk	1.54347e-34	0.333908	0.998	0.996	4.32141e-30	E15.5-1
Ssbp2	4.81061e-27	0.330999	0.907	0.815	1.34687e-22	E15.5-1
Celf6	3.86144e-25	0.323656	0.778	0.614	1.08112e-20	E15.5-1
Hmgn1	5.71089e-46	0.323598	0.996	0.994	1.59893e-41	E15.5-1
Tub	2.52369e-26	0.321166	0.838	0.728	7.06584e-22	E15.5-1
Lrch2	8.04739e-20	0.319568	0.556	0.397	2.25311e-15	E15.5-1
Chmp4b	9.87714e-20	0.316073	0.804	0.741	2.7654e-15	E15.5-1
Ppp1r9a	9.56998e-19	0.313293	0.711	0.606	2.6794e-14	E15.5-1
Bex2	9.97378e-40	0.312897	0.998	0.977	2.79246e-35	E15.5-1
Mad2l2	2.5092e-22	0.312421	0.811	0.718	7.02525e-18	E15.5-1
Kdm6b	4.89277e-08	0.312055	0.624	0.572	0.00136988	E15.5-1
Gm13889	5.78811e-20	0.310139	0.311	0.14	1.62055e-15	E15.5-1
Jam3	8.05303e-23	0.309248	0.627	0.451	2.25469e-18	E15.5-1
Asb4	1.71195e-21	0.309001	0.609	0.373	4.79312e-17	E15.5-1
Tmem176b	6.58172e-22	0.304462	0.878	0.762	1.84275e-17	E15.5-1
H3f3b	4.25592e-36	0.303853	1	1	1.19157e-31	E15.5-1
Scg2	1.71632e-13	0.300895	0.631	0.483	4.80535e-09	E15.5-1
Meg3	1.68953e-29	0.299467	0.984	0.99	4.73033e-25	E15.5-1
Irf2bpl	3.60339e-17	0.298768	0.822	0.739	1.00888e-12	E15.5-1
Ube2b	5.70784e-33	0.297152	0.969	0.949	1.59808e-28	E15.5-1
Hsph1	2.87178e-18	0.294427	0.649	0.504	8.04041e-14	E15.5-1
Snap25	8.40229e-12	0.292411	0.78	0.726	2.35247e-07	E15.5-1
Gabra5	2.57456e-16	0.29198	0.584	0.427	7.20826e-12	E15.5-1
Camk2n1	2.01612e-21	0.289285	0.796	0.639	5.64473e-17	E15.5-1
Maged1	5.91045e-18	0.289038	0.984	0.983	1.65481e-13	E15.5-1
Gpr179	2.16302e-25	0.284929	0.309	0.118	6.05602e-21	E15.5-1
Sh3kbp1	1.2641e-18	0.284482	0.598	0.445	3.53923e-14	E15.5-1
Gck	3.88472e-21	0.282907	0.533	0.343	1.08764e-16	E15.5-1
Nfkbia	3.20996e-08	0.282447	0.416	0.324	0.000898725	E15.5-1
Scn3a	1.47185e-15	0.281844	0.662	0.55	4.12089e-11	E15.5-1
Sox21	3.70269e-19	0.281119	0.424	0.225	1.03668e-14	E15.5-1
Phip	2.77003e-16	0.278205	0.858	0.804	7.75554e-12	E15.5-1
St8sia4	6.4037e-15	0.277548	0.391	0.243	1.79291e-10	E15.5-1
Hmgn2	3.1908e-28	0.275275	0.958	0.939	8.93361e-24	E15.5-1
Tpt1	2.88392e-35	0.273082	0.996	0.998	8.07441e-31	E15.5-1
Dbpht2	2.60498e-22	0.272242	0.424	0.216	7.29343e-18	E15.5-1
Ptprn	4.88774e-11	0.271458	0.458	0.348	1.36847e-06	E15.5-1
Efnb3	6.0141e-14	0.267147	0.878	0.83	1.68383e-09	E15.5-1
Malat1	1.83557e-19	0.264946	1	0.999	5.13922e-15	E15.5-1
Adgra1	8.74321e-16	0.264122	0.34	0.188	2.44792e-11	E15.5-1
Nr3c1	4.61308e-28	0.26204	0.293	0.101	1.29157e-23	E15.5-1
Ngfrap1	5.13523e-38	0.260877	0.998	0.994	1.43776e-33	E15.5-1
Tmem108	1.06352e-16	0.260063	0.502	0.336	2.97765e-12	E15.5-1
Cyth1	7.46612e-16	0.259667	0.504	0.361	2.09037e-11	E15.5-1
Ago2	1.40062e-11	0.259396	0.611	0.515	3.92146e-07	E15.5-1
Ntrk3	6.49756e-12	0.258983	0.429	0.295	1.81919e-07	E15.5-1
Tmem130	1.42998e-10	0.258781	0.727	0.653	4.00367e-06	E15.5-1
Prkar1a	9.21447e-25	0.25549	0.944	0.927	2.57987e-20	E15.5-1
Nol4	2.49323e-15	0.254542	0.476	0.314	6.98055e-11	E15.5-1
Rem2	1.82424e-12	0.251988	0.447	0.303	5.10752e-08	E15.5-1
Rps6ka6	2.09296e-13	0.250629	0.362	0.23	5.85987e-09	E15.5-1
Chchd10	7.13124e-108	1.14792	0.891	0.519	1.99661e-103	E15.5-2
S100a10	8.80389e-81	0.96415	0.82	0.425	2.46491e-76	E15.5-2
Prdm12	2.35985e-139	0.846681	0.73	0.16	6.60712e-135	E15.5-2
Lmo3	1.3707e-32	0.833511	0.637	0.41	3.83768e-28	E15.5-2
Calb1	1.53196e-47	0.817128	0.628	0.273	4.28919e-43	E15.5-2
Islr2	2.80657e-80	0.812936	0.856	0.424	7.85784e-76	E15.5-2
Six3	1.18521e-96	0.739324	0.968	0.566	3.31835e-92	E15.5-2
Nkx2-1	3.25643e-82	0.71837	0.981	0.65	9.11735e-78	E15.5-2
Nell2	4.32676e-70	0.711648	0.832	0.493	1.2114e-65	E15.5-2
Slc25a5	6.12734e-36	0.698984	0.966	0.933	1.71553e-31	E15.5-2
Nptx2	3.91891e-75	0.687441	0.616	0.196	1.09722e-70	E15.5-2
Sox2	1.60319e-85	0.676479	0.895	0.413	4.48862e-81	E15.5-2
Pomc	5.36286e-12	0.653868	1	1	1.50149e-07	E15.5-2
Six6	2.82742e-44	0.638597	0.837	0.488	7.91622e-40	E15.5-2
Sox14	1.01706e-42	0.60248	0.567	0.231	2.84756e-38	E15.5-2
Nr5a1	2.30788e-123	0.599547	0.569	0.085	6.4616e-119	E15.5-2
Sox3	4.31889e-60	0.551318	0.567	0.197	1.2092e-55	E15.5-2
Cnr1	9.34213e-57	0.544366	0.689	0.314	2.61561e-52	E15.5-2
Syt4	2.27052e-25	0.538889	0.847	0.695	6.35699e-21	E15.5-2
Bcl11b	1.31856e-80	0.519368	0.686	0.215	3.6917e-76	E15.5-2
Enc1	2.99737e-53	0.513158	0.781	0.428	8.39205e-49	E15.5-2
Rbp1	3.34548e-52	0.483498	0.786	0.416	9.36668e-48	E15.5-2
Serpine2	4.4546e-27	0.483219	0.652	0.393	1.2472e-22	E15.5-2
Gm2694	1.2252e-37	0.480245	0.645	0.314	3.43031e-33	E15.5-2
Nnat	3.81693e-77	0.45447	1	1	1.06866e-72	E15.5-2
Thsd4	8.97243e-60	0.443264	0.455	0.124	2.5121e-55	E15.5-2
Sox11	2.29797e-48	0.439651	1	0.982	6.43386e-44	E15.5-2
Ppp1r14b	3.41731e-43	0.421944	0.937	0.791	9.56777e-39	E15.5-2
Robo2	1.17843e-51	0.419664	0.65	0.26	3.29938e-47	E15.5-2
Hmgb3	4.66762e-61	0.419394	0.995	0.971	1.30684e-56	E15.5-2
Cacna2d1	1.53874e-46	0.411053	0.803	0.458	4.30818e-42	E15.5-2
Coro1c	1.96281e-36	0.394361	0.893	0.7	5.49547e-32	E15.5-2
Klf7	1.4785e-25	0.389421	0.869	0.734	4.13951e-21	E15.5-2
Eif4a1	2.65288e-57	0.380345	0.998	0.997	7.42753e-53	E15.5-2
Klf6	1.52029e-28	0.375631	0.696	0.463	4.25649e-24	E15.5-2
Bend5	5.83296e-27	0.3729	0.815	0.608	1.63311e-22	E15.5-2
Sox1	3.18173e-40	0.3645	0.759	0.403	8.9082e-36	E15.5-2
Arf6	1.15438e-29	0.363937	0.71	0.472	3.23203e-25	E15.5-2
Stmn2	2.17244e-48	0.361322	1	0.972	6.08241e-44	E15.5-2
Sox21	3.1106e-32	0.356528	0.494	0.212	8.70905e-28	E15.5-2
Rbfox1	9.04182e-34	0.354387	0.62	0.313	2.53153e-29	E15.5-2
Aes	2.50756e-26	0.351531	0.939	0.874	7.02066e-22	E15.5-2
Nhlh2	2.85587e-36	0.349897	0.808	0.475	7.99586e-32	E15.5-2
Nfib	2.47787e-17	0.34914	0.37	0.177	6.93753e-13	E15.5-2
Bcl11a	2.1453e-41	0.346142	0.864	0.539	6.00642e-37	E15.5-2
Tuba1a	7.45974e-34	0.344333	1	1	2.08858e-29	E15.5-2
Prox1	2.69087e-25	0.342721	0.545	0.288	7.5339e-21	E15.5-2
Rbm3	4.37043e-42	0.341854	0.995	0.956	1.22363e-37	E15.5-2
Dpysl4	1.81674e-23	0.33193	0.798	0.62	5.08652e-19	E15.5-2
Prmt8	3.7038e-41	0.327485	0.56	0.239	1.03699e-36	E15.5-2
Rnf165	5.67494e-23	0.3267	0.869	0.683	1.58887e-18	E15.5-2
Pea15a	5.31386e-34	0.326598	0.959	0.856	1.48777e-29	E15.5-2
Thra	9.59298e-35	0.323735	0.983	0.963	2.68584e-30	E15.5-2
Igfbpl1	1.6745e-36	0.321761	0.803	0.458	4.68826e-32	E15.5-2
Magel2	2.14265e-22	0.319707	0.898	0.676	5.999e-18	E15.5-2
Mycn	3.81309e-29	0.319556	0.543	0.275	1.06759e-24	E15.5-2
Celf2	3.32787e-33	0.318322	0.973	0.857	9.31738e-29	E15.5-2
Crtac1	2.28589e-33	0.314262	0.448	0.176	6.40002e-29	E15.5-2
Tagln2	2.90078e-25	0.313868	0.577	0.309	8.12161e-21	E15.5-2
Tubb3	3.64348e-39	0.313327	1	0.986	1.0201e-34	E15.5-2
Tubb5	1.60909e-56	0.308122	1	1	4.50512e-52	E15.5-2
Foxp2	2.34538e-33	0.303953	0.511	0.212	6.56658e-29	E15.5-2
Pcbp4	1.96701e-29	0.303071	0.981	0.9	5.50724e-25	E15.5-2
Tox3	1.05481e-21	0.302267	0.786	0.558	2.95326e-17	E15.5-2
Fscn1	1.21881e-29	0.299729	0.99	0.959	3.41243e-25	E15.5-2
Zbtb20	1.17876e-10	0.292568	0.847	0.798	3.3003e-06	E15.5-2
Sept6	2.08236e-21	0.291611	0.718	0.502	5.83018e-17	E15.5-2
Calm3	3.50312e-36	0.291503	0.995	0.985	9.80803e-32	E15.5-2
Rnd3	1.23583e-23	0.287625	0.652	0.407	3.46007e-19	E15.5-2
Akap7	1.47853e-12	0.286547	0.394	0.242	4.1396e-08	E15.5-2
Fabp5	8.23609e-32	0.286241	0.998	0.969	2.30594e-27	E15.5-2
Nav2	6.56284e-28	0.285097	0.584	0.305	1.83747e-23	E15.5-2
Mif	2.8789e-23	0.283684	0.993	0.986	8.06033e-19	E15.5-2
Mgst3	1.35665e-17	0.2815	0.818	0.666	3.79835e-13	E15.5-2
Cbln1	6.43121e-12	0.279099	0.411	0.254	1.80061e-07	E15.5-2
Eno1	4.46824e-19	0.278143	0.898	0.78	1.25102e-14	E15.5-2
Dpysl3	1.06643e-19	0.277686	0.971	0.923	2.98578e-15	E15.5-2
Ldha	4.39377e-16	0.277489	0.71	0.548	1.23017e-11	E15.5-2
Cnn3	1.93319e-14	0.27656	0.681	0.493	5.41255e-10	E15.5-2
Dstn	1.41165e-35	0.276206	0.988	0.962	3.95235e-31	E15.5-2
Shtn1	4.61444e-24	0.275711	0.586	0.337	1.29195e-19	E15.5-2
Tppp3	4.61361e-15	0.275169	0.737	0.535	1.29172e-10	E15.5-2
Arhgdia	4.7431e-27	0.271679	0.956	0.87	1.32797e-22	E15.5-2
Plp1	3.7156e-20	0.270456	0.499	0.281	1.04029e-15	E15.5-2
Peg12	2.50908e-37	0.268455	0.353	0.104	7.02493e-33	E15.5-2
Elavl4	4.11586e-14	0.267542	0.959	0.879	1.15236e-09	E15.5-2
Fam60a	2.07614e-18	0.266705	0.63	0.413	5.81278e-14	E15.5-2
Gstm7	4.96962e-21	0.266381	0.732	0.499	1.3914e-16	E15.5-2
Map1b	6.5622e-32	0.265866	1	0.981	1.83729e-27	E15.5-2
Lmnb1	3.39948e-21	0.263155	0.781	0.57	9.51788e-17	E15.5-2
Dazap1	1.27961e-20	0.262472	0.92	0.804	3.58264e-16	E15.5-2
Dpysl2	1.0065e-17	0.262052	0.995	0.986	2.81799e-13	E15.5-2
Elavl3	4.81596e-27	0.26198	0.99	0.931	1.34837e-22	E15.5-2
Prr5	4.08134e-30	0.258021	0.453	0.193	1.14269e-25	E15.5-2
Cdh22	2.15777e-26	0.255842	0.411	0.176	6.04132e-22	E15.5-2
Ass1	1.24511e-17	0.253298	0.358	0.173	3.48605e-13	E15.5-2
Nxn	6.30286e-22	0.251519	0.467	0.241	1.76467e-17	E15.5-2
Nup62cl	1.00652e-09	0.25124	0.178	0.078	2.81806e-05	E15.5-2
Pomc	9.12276e-81	1.38047	1	1	2.55419e-76	E15.5-3
Cpne4	1.57911e-95	0.766258	0.695	0.166	4.4212e-91	E15.5-3
Fam183b	3.95624e-67	0.675391	0.844	0.382	1.10767e-62	E15.5-3
D930028M14Rik	1.11745e-35	0.621026	0.496	0.177	3.12864e-31	E15.5-3
Tbx3os1	1.23527e-68	0.584647	0.638	0.172	3.4585e-64	E15.5-3
Tbx3	3.62535e-53	0.575096	0.915	0.47	1.01503e-48	E15.5-3
Calb1	1.42276e-43	0.563411	0.699	0.287	3.98344e-39	E15.5-3
Gpx3	4.14917e-50	0.520564	0.713	0.282	1.16168e-45	E15.5-3
Tmeff2	1.61521e-34	0.519417	0.848	0.519	4.52227e-30	E15.5-3
Rnf128	5.17151e-93	0.50373	0.511	0.071	1.44792e-88	E15.5-3
Nefl	5.53669e-20	0.496282	0.617	0.372	1.55016e-15	E15.5-3
Peg3	3.76197e-49	0.48796	0.993	0.894	1.05328e-44	E15.5-3
Mmd2	7.72841e-54	0.481817	0.553	0.169	2.1638e-49	E15.5-3
Rit2	6.1324e-38	0.476066	0.858	0.549	1.71695e-33	E15.5-3
Asb4	1.6265e-32	0.466485	0.745	0.374	4.55387e-28	E15.5-3
Prkce	2.35919e-48	0.46482	0.809	0.417	6.60526e-44	E15.5-3
Caly	2.89775e-32	0.454177	0.95	0.762	8.11311e-28	E15.5-3
Rgs4	5.65723e-39	0.432943	0.752	0.359	1.58391e-34	E15.5-3
Atp1b1	7.01173e-31	0.432076	0.947	0.739	1.96314e-26	E15.5-3
Tle4	3.7432e-34	0.409339	0.883	0.573	1.04802e-29	E15.5-3
Atp1a1	1.29873e-30	0.408749	0.777	0.479	3.63619e-26	E15.5-3
Fxyd6	4.00821e-48	0.404963	1	0.97	1.12222e-43	E15.5-3
Dpys	2.81919e-59	0.399022	0.486	0.107	7.89318e-55	E15.5-3
Isl1	1.6206e-32	0.392003	0.972	0.614	4.53737e-28	E15.5-3
Peg10	1.33441e-32	0.391223	0.961	0.61	3.73607e-28	E15.5-3
Slc25a5	1.14392e-20	0.379408	0.972	0.935	3.20274e-16	E15.5-3
Tox2	7.20405e-33	0.37535	0.943	0.667	2.01699e-28	E15.5-3
Tbx3os2	8.07226e-60	0.368356	0.429	0.08	2.26007e-55	E15.5-3
AW551984	5.07495e-27	0.368232	0.865	0.59	1.42088e-22	E15.5-3
Nap1l5	5.23843e-32	0.361791	0.996	0.884	1.46665e-27	E15.5-3
Bex2	2.54302e-44	0.356656	1	0.979	7.11994e-40	E15.5-3
Dbpht2	4.16801e-31	0.337309	0.539	0.218	1.16696e-26	E15.5-3
Baiap3	2.06986e-32	0.337244	0.578	0.232	5.79519e-28	E15.5-3
Lhx2	7.61614e-40	0.33293	0.454	0.129	2.13237e-35	E15.5-3
Sub1	1.73446e-41	0.327339	1	0.995	4.85614e-37	E15.5-3
Mpped2	4.39661e-22	0.321749	0.943	0.806	1.23096e-17	E15.5-3
Celf6	4.66863e-23	0.320238	0.876	0.614	1.30712e-18	E15.5-3
Ppp1r17	5.67151e-39	0.312565	0.518	0.166	1.58791e-34	E15.5-3
Nop10	1.90774e-24	0.309446	0.982	0.915	5.34128e-20	E15.5-3
Gas7	4.44183e-33	0.308815	0.479	0.172	1.24362e-28	E15.5-3
Hs6st2	5.43438e-21	0.306619	0.504	0.237	1.52152e-16	E15.5-3
Elavl4	2.70123e-22	0.30609	0.982	0.881	7.5629e-18	E15.5-3
Hmgn3	6.59566e-16	0.303113	0.84	0.693	1.84665e-11	E15.5-3
Pcsk2	8.5756e-15	0.301419	0.521	0.303	2.401e-10	E15.5-3
Igfbp5	2.3701e-27	0.29786	0.613	0.284	6.63581e-23	E15.5-3
Ndn	0.000125263	0.292299	0.851	0.851	1	E15.5-3
Etv1	2.32213e-38	0.291917	0.369	0.09	6.50151e-34	E15.5-3
Vat1l	2.69411e-19	0.289549	0.819	0.587	7.54296e-15	E15.5-3
Pou2f2	5.40483e-16	0.289102	0.943	0.76	1.51324e-11	E15.5-3
Ahi1	3.73908e-22	0.284831	0.979	0.862	1.04687e-17	E15.5-3
Calm2	1.31556e-34	0.28449	1	0.999	3.68331e-30	E15.5-3
Ncam1	7.38698e-20	0.281905	0.996	0.96	2.06821e-15	E15.5-3
Fxyd7	1.11981e-16	0.281004	0.826	0.587	3.13524e-12	E15.5-3
Prkar2a	1.58229e-18	0.27968	0.894	0.726	4.43008e-14	E15.5-3
Gprasp2	5.19216e-16	0.27855	0.883	0.751	1.4537e-11	E15.5-3
Rab3b	6.90429e-17	0.276704	0.663	0.437	1.93306e-12	E15.5-3
Gnaz	4.16879e-19	0.275747	0.904	0.714	1.16718e-14	E15.5-3
Serp2	1.61697e-20	0.2727	0.947	0.785	4.5272e-16	E15.5-3
Gpc6	1.60581e-23	0.272142	0.436	0.182	4.49594e-19	E15.5-3
Bpifb1	1.98673e-54	0.27187	0.355	0.059	5.56245e-50	E15.5-3
Pkib	2.70657e-36	0.271043	0.319	0.073	7.57786e-32	E15.5-3
Itm2c	9.55738e-18	0.270793	0.926	0.766	2.67588e-13	E15.5-3
Kcnip1	7.66313e-22	0.269517	0.638	0.346	2.14552e-17	E15.5-3
Syp	4.52252e-13	0.268734	0.872	0.7	1.26622e-08	E15.5-3
Hs2st1	8.25781e-17	0.268497	0.599	0.367	2.31202e-12	E15.5-3
Prokr1	7.63295e-66	0.268211	0.305	0.031	2.13707e-61	E15.5-3
Nenf	1.53189e-17	0.265444	0.95	0.841	4.28897e-13	E15.5-3
Ppp1r9a	1.06097e-17	0.265343	0.816	0.6	2.97051e-13	E15.5-3
Nrsn2	1.3703e-17	0.264497	0.862	0.605	3.83657e-13	E15.5-3
Tox	2.5713e-15	0.263147	0.695	0.457	7.19914e-11	E15.5-3
1500035N22Rik	6.23191e-22	0.262727	0.628	0.331	1.74481e-17	E15.5-3
Pigp	3.43425e-15	0.262094	0.872	0.737	9.6152e-11	E15.5-3
Scn9a	6.29235e-18	0.260375	0.691	0.424	1.76173e-13	E15.5-3
1700086L19Rik	5.05447e-26	0.25996	0.436	0.163	1.41515e-21	E15.5-3
Ammecr1	6.59857e-22	0.257267	0.443	0.193	1.84747e-17	E15.5-3
Gap43	5.08361e-16	0.256826	1	0.957	1.42331e-11	E15.5-3
Cda	3.30851e-32	0.254286	0.326	0.086	9.26318e-28	E15.5-3
Pitx2	5.82598e-148	1.97063	0.686	0.07	1.63116e-143	E15.5-4
Barhl1	1.66366e-169	1.56151	0.598	0.031	4.65791e-165	E15.5-4
Foxa1	2.09108e-109	1.45152	0.665	0.102	5.8546e-105	E15.5-4
Tac1	8.69046e-25	1.06873	0.407	0.145	2.43315e-20	E15.5-4
Foxp2	1.28872e-56	0.951769	0.675	0.23	3.60817e-52	E15.5-4
C130021I20Rik	1.14153e-124	0.945002	0.66	0.076	3.19606e-120	E15.5-4
Calb2	4.87371e-17	0.904858	0.541	0.313	1.36454e-12	E15.5-4
Nxph1	3.34064e-70	0.873963	0.562	0.113	9.35312e-66	E15.5-4
Igfbpl1	1.50572e-17	0.826266	0.737	0.504	4.21572e-13	E15.5-4
Ddah1	2.41157e-33	0.822465	0.629	0.303	6.7519e-29	E15.5-4
Lmx1a	1.63458e-94	0.802889	0.593	0.082	4.57649e-90	E15.5-4
Mir124-2hg	2.68057e-86	0.80265	0.722	0.153	7.50505e-82	E15.5-4
Tcf7l2	0.000388069	0.791087	0.237	0.394	1	E15.5-4
Irx5	6.9438e-50	0.759449	0.314	0.042	1.94413e-45	E15.5-4
Foxp1	3.01584e-26	0.75669	0.68	0.421	8.44376e-22	E15.5-4
Uncx	2.19653e-85	0.714099	0.521	0.067	6.14984e-81	E15.5-4
Pou3f4	1.0053e-91	0.704869	0.448	0.043	2.81463e-87	E15.5-4
Dmrtb1	3.61913e-50	0.6876	0.562	0.152	1.01328e-45	E15.5-4
Cd24a	1.0142e-59	0.652249	1	0.963	2.83955e-55	E15.5-4
Irx6	2.28286e-65	0.641883	0.268	0.017	6.39155e-61	E15.5-4
Bcl11a	6.49712e-29	0.641875	0.825	0.58	1.81906e-24	E15.5-4
Rab3c	1.77819e-34	0.594733	0.809	0.495	4.97858e-30	E15.5-4
Elavl2	7.63001e-36	0.591062	0.866	0.528	2.13625e-31	E15.5-4
C1ql1	4.11137e-60	0.590362	0.412	0.06	1.1511e-55	E15.5-4
Zic1	0.000422088	0.586362	0.247	0.157	1	E15.5-4
Tuba1a	2.23377e-42	0.585915	1	1	6.25411e-38	E15.5-4
Svbp	7.16249e-40	0.582786	0.943	0.772	2.00535e-35	E15.5-4
Sox4	7.96551e-31	0.573181	0.995	0.952	2.23018e-26	E15.5-4
Cck	5.7392e-40	0.555161	0.139	0.006	1.60686e-35	E15.5-4
Irx3	1.25255e-63	0.55074	0.289	0.022	3.5069e-59	E15.5-4
Vsnl1	7.50664e-35	0.544368	0.433	0.119	2.10171e-30	E15.5-4
Barhl2	7.00912e-62	0.542786	0.304	0.027	1.96241e-57	E15.5-4
Lsamp	3.4769e-17	0.525606	0.737	0.548	9.73463e-13	E15.5-4
Runx1t1	5.11e-10	0.525359	0.742	0.608	1.4307e-05	E15.5-4
Atat1	6.78627e-40	0.525181	0.959	0.831	1.90002e-35	E15.5-4
Rmst	3.90876e-19	0.513422	0.768	0.524	1.09438e-14	E15.5-4
Gm28050	1.32492e-52	0.51002	0.356	0.053	3.7095e-48	E15.5-4
Celf2	7.51362e-22	0.503672	0.969	0.87	2.10366e-17	E15.5-4
Lmx1b	1.11609e-66	0.501777	0.412	0.053	3.12484e-62	E15.5-4
Crnde	8.18977e-54	0.497031	0.325	0.041	2.29297e-49	E15.5-4
Rac3	3.15111e-28	0.489491	0.969	0.795	8.82247e-24	E15.5-4
Onecut2	3.13216e-09	0.489026	0.387	0.214	8.76941e-05	E15.5-4
Robo2	1.23362e-15	0.487613	0.562	0.314	3.45388e-11	E15.5-4
Stmn1	3.27978e-57	0.486604	1	1	9.18272e-53	E15.5-4
Plppr1	3.28939e-32	0.48183	0.629	0.267	9.20963e-28	E15.5-4
Tubb2b	1.57651e-42	0.461102	1	0.999	4.41391e-38	E15.5-4
Tubb3	6.89213e-37	0.460954	1	0.987	1.92966e-32	E15.5-4
Dpysl3	6.81215e-32	0.458841	0.995	0.926	1.90726e-27	E15.5-4
Celf4	1.63993e-25	0.45786	0.99	0.92	4.59147e-21	E15.5-4
Chl1	1.18796e-24	0.452206	0.68	0.355	3.32606e-20	E15.5-4
Nsg2	2.97588e-27	0.448877	0.964	0.901	8.33187e-23	E15.5-4
Nsg1	5.22792e-39	0.444	0.995	0.967	1.46371e-34	E15.5-4
Zfhx3	8.29746e-17	0.442019	0.876	0.729	2.32312e-12	E15.5-4
Pbx3	1.14278e-24	0.44187	0.479	0.182	3.19956e-20	E15.5-4
Tmem35	2.08952e-27	0.441651	0.814	0.466	5.85024e-23	E15.5-4
Nova1	1.18288e-25	0.438812	0.696	0.368	3.31182e-21	E15.5-4
Mapt	2.12027e-28	0.432216	0.99	0.927	5.93633e-24	E15.5-4
Pantr1	1.67828e-57	0.430847	0.402	0.059	4.69886e-53	E15.5-4
C1ql3	8.03999e-52	0.430507	0.222	0.015	2.25104e-47	E15.5-4
Cacna2d1	2.46419e-11	0.426538	0.691	0.51	6.89923e-07	E15.5-4
Serpini1	2.25112e-19	0.418654	0.582	0.317	6.30268e-15	E15.5-4
Tspan13	2.91484e-25	0.417214	0.964	0.915	8.16098e-21	E15.5-4
Olfm1	6.21108e-25	0.417177	0.918	0.693	1.73898e-20	E15.5-4
Gnai1	1.03425e-18	0.408769	0.572	0.315	2.8957e-14	E15.5-4
Ube2d1	4.56403e-25	0.401816	0.948	0.826	1.27784e-20	E15.5-4
Basp1	3.79179e-38	0.3977	1	0.985	1.06163e-33	E15.5-4
Nrep	1.00739e-22	0.394129	0.969	0.858	2.8205e-18	E15.5-4
Rgma	5.29018e-17	0.388005	0.454	0.212	1.48115e-12	E15.5-4
Opcml	1.32036e-07	0.384731	0.356	0.211	0.00369675	E15.5-4
Ntng1	1.03762e-10	0.382878	0.418	0.233	2.90512e-06	E15.5-4
Zfhx4	2.18168e-11	0.380521	0.582	0.397	6.10827e-07	E15.5-4
Sh3bp5	2.31875e-22	0.379738	0.876	0.6	6.49204e-18	E15.5-4
Nrn1	7.39228e-44	0.378012	0.418	0.082	2.06969e-39	E15.5-4
Kifap3	6.37976e-19	0.373498	0.835	0.657	1.78621e-14	E15.5-4
Snhg11	6.22149e-10	0.370345	0.835	0.643	1.74189e-05	E15.5-4
Actg1	1.11319e-39	0.365265	1	1	3.11672e-35	E15.5-4
Nkain3	6.02042e-23	0.363754	0.443	0.17	1.6856e-18	E15.5-4
Glra2	8.77238e-29	0.36294	0.443	0.137	2.45609e-24	E15.5-4
Map1b	2.22209e-29	0.36036	1	0.983	6.22141e-25	E15.5-4
Ckb	2.95732e-23	0.359387	0.964	0.882	8.2799e-19	E15.5-4
Crmp1	4.47163e-23	0.358498	0.99	0.942	1.25197e-18	E15.5-4
Zcchc12	1.75604e-10	0.357381	0.943	0.868	4.91655e-06	E15.5-4
Mllt11	1.53108e-29	0.351833	0.995	0.968	4.28672e-25	E15.5-4
Stmn4	2.20529e-13	0.351675	0.99	0.929	6.17437e-09	E15.5-4
Ebf3	1.20377e-10	0.340555	0.237	0.093	3.3703e-06	E15.5-4
Snn	1.03231e-16	0.337123	0.763	0.546	2.89025e-12	E15.5-4
Slc17a6	7.97458e-20	0.33625	0.562	0.261	2.23272e-15	E15.5-4
Sh3bp1	1.07166e-16	0.335828	0.871	0.726	3.00044e-12	E15.5-4
Ina	7.21077e-16	0.333998	0.974	0.908	2.01887e-11	E15.5-4
Clmp	9.63685e-17	0.332604	0.67	0.398	2.69812e-12	E15.5-4
Iqcj	2.84398e-42	0.330538	0.289	0.041	7.96259e-38	E15.5-4
Crip2	2.40325e-15	0.327698	0.948	0.882	6.72862e-11	E15.5-4
Ncs1	1.99684e-14	0.324164	0.83	0.658	5.59077e-10	E15.5-4
Ppp3ca	1.71314e-14	0.323553	0.918	0.811	4.79645e-10	E15.5-4
Adcyap1	1.0163e-19	0.319545	0.345	0.118	2.84545e-15	E15.5-4
Myt1l	2.42621e-11	0.319053	0.691	0.503	6.79291e-07	E15.5-4
Ddah2	2.65584e-11	0.316375	0.933	0.863	7.43581e-07	E15.5-4
Nr4a2	0.00100637	0.316015	0.33	0.229	1	E15.5-4
Nrxn1	1.46812e-11	0.314716	0.835	0.724	4.11045e-07	E15.5-4
Gpm6a	4.32617e-14	0.314191	0.948	0.832	1.21124e-09	E15.5-4
Evl	1.16919e-19	0.31337	0.995	0.945	3.2735e-15	E15.5-4
Tubb5	1.41775e-30	0.313148	1	1	3.96942e-26	E15.5-4
Gng2	4.33437e-17	0.312775	0.974	0.884	1.21354e-12	E15.5-4
Tubb2a	9.1798e-14	0.311888	1	0.964	2.57016e-09	E15.5-4
Cnn3	6.58866e-08	0.311709	0.68	0.515	0.00184469	E15.5-4
Hist3h2ba	1.13631e-14	0.30979	0.985	0.958	3.18143e-10	E15.5-4
Eno1	3.08971e-10	0.309426	0.871	0.796	8.65058e-06	E15.5-4
Tmem163	3.76353e-17	0.307013	0.572	0.285	1.05371e-12	E15.5-4
Ntm	0.000582281	0.30658	0.649	0.585	1	E15.5-4
Igsf21	1.71742e-24	0.305105	0.247	0.054	4.80842e-20	E15.5-4
Hist3h2a	1.02028e-09	0.303807	0.809	0.628	2.85657e-05	E15.5-4
Khdrbs2	2.70984e-12	0.303713	0.572	0.354	7.58701e-08	E15.5-4
Grm5	4.50269e-15	0.303445	0.376	0.165	1.26066e-10	E15.5-4
Zic4	0.0026477	0.302562	0.155	0.093	1	E15.5-4
Ccdc85a	1.25163e-15	0.302234	0.428	0.199	3.50432e-11	E15.5-4
Chd3os	7.62223e-15	0.302179	0.907	0.809	2.13407e-10	E15.5-4
Pole4	8.40889e-14	0.30115	0.552	0.325	2.35432e-09	E15.5-4
Ptpre	7.44775e-43	0.300383	0.299	0.044	2.08522e-38	E15.5-4
Tmeff1	3.82818e-17	0.30005	0.964	0.816	1.07181e-12	E15.5-4
Pkia	9.58479e-14	0.299495	0.835	0.701	2.68355e-09	E15.5-4
Bzw2	1.25399e-12	0.298234	0.897	0.818	3.51092e-08	E15.5-4
Wasf1	2.5289e-11	0.296278	0.727	0.562	7.08043e-07	E15.5-4
Iglon5	5.18373e-19	0.295294	0.495	0.221	1.45134e-14	E15.5-4
Bcl11b	2.61894e-07	0.292142	0.459	0.293	0.00733251	E15.5-4
Cntnap5a	8.09411e-13	0.290733	0.299	0.124	2.26619e-08	E15.5-4
Cd200	1.48564e-12	0.288213	0.943	0.821	4.1595e-08	E15.5-4
H2afy2	7.19637e-16	0.287829	0.979	0.926	2.01484e-11	E15.5-4
Uchl3	4.55505e-11	0.287749	0.876	0.751	1.27532e-06	E15.5-4
Akap9	2.28218e-12	0.287455	0.876	0.775	6.38965e-08	E15.5-4
Nr2f1	4.74839e-05	0.284172	0.175	0.089	1	E15.5-4
Elmo1	1.59069e-12	0.283219	0.536	0.315	4.45361e-08	E15.5-4
Atp1b1	3.19544e-07	0.280742	0.825	0.762	0.00894659	E15.5-4
C1qtnf4	3.28898e-10	0.280671	0.866	0.732	9.2085e-06	E15.5-4
Ppp1cb	1.55022e-12	0.277908	0.851	0.78	4.34029e-08	E15.5-4
Pxylp1	1.64088e-10	0.27747	0.387	0.206	4.59414e-06	E15.5-4
Podxl2	1.59472e-16	0.277099	0.979	0.924	4.46491e-12	E15.5-4
Actl6b	6.88275e-13	0.276367	0.918	0.791	1.92703e-08	E15.5-4
PISD	6.01399e-10	0.27634	0.722	0.559	1.6838e-05	E15.5-4
2010107G23Rik	1.36321e-12	0.275141	0.763	0.58	3.81673e-08	E15.5-4
Reep1	9.32756e-12	0.274926	0.892	0.753	2.61153e-07	E15.5-4
Cdh4	4.15178e-11	0.273545	0.366	0.18	1.16241e-06	E15.5-4
Hmgcs1	1.87999e-08	0.273197	0.887	0.775	0.000526359	E15.5-4
Tusc2	7.99797e-15	0.269603	0.716	0.473	2.23927e-10	E15.5-4
Dner	2.5203e-11	0.268949	0.881	0.716	7.05635e-07	E15.5-4
Kirrel3	1.32152e-16	0.268216	0.258	0.078	3.69999e-12	E15.5-4
Smarcd1	8.3282e-11	0.267836	0.727	0.563	2.33173e-06	E15.5-4
Mlf1	8.38098e-16	0.26771	0.222	0.063	2.34651e-11	E15.5-4
G3bp2	2.14126e-10	0.267	0.861	0.802	5.99511e-06	E15.5-4
Snx3	8.63049e-12	0.264666	0.851	0.689	2.41636e-07	E15.5-4
Ptpn5	1.74243e-10	0.262691	0.691	0.503	4.87845e-06	E15.5-4
Pid1	1.53907e-05	0.261423	0.479	0.332	0.430909	E15.5-4
Clcn4	6.20972e-10	0.259029	0.711	0.532	1.7386e-05	E15.5-4
Rfng	3.21634e-12	0.258828	0.598	0.371	9.00511e-08	E15.5-4
Fam171a2	3.52001e-09	0.258574	0.773	0.644	9.85532e-05	E15.5-4
Dpysl5	1.13747e-10	0.258194	0.84	0.718	3.18469e-06	E15.5-4
Ppib	1.89788e-13	0.257143	0.902	0.747	5.31369e-09	E15.5-4
Edil3	7.03097e-11	0.256855	0.356	0.175	1.96853e-06	E15.5-4
Tmem44	1.85821e-11	0.255166	0.49	0.286	5.20263e-07	E15.5-4
Lingo2	3.56251e-08	0.254484	0.392	0.231	0.00099743	E15.5-4
Chn1	2.16894e-12	0.253655	0.814	0.625	6.0726e-08	E15.5-4
Cpe	1.68365e-11	0.251981	0.99	0.93	4.7139e-07	E15.5-4
Tnrc6c	0.000395838	0.251679	0.825	0.823	1	E15.5-4
Id4	1.0691e-05	0.251198	0.418	0.274	0.299328	E15.5-4
Dcx	3.6105e-11	0.251141	0.959	0.883	1.01087e-06	E15.5-4
Hes6	2.24244e-09	0.250938	0.737	0.586	6.27837e-05	E15.5-4
Ccdc124	2.18218e-12	0.250927	0.851	0.752	6.10966e-08	E15.5-4
Wdr47	8.42525e-11	0.250767	0.526	0.318	2.3589e-06	E15.5-4
Phyhipl	3.72296e-07	0.250456	0.737	0.641	0.0104235	E15.5-4
Stau2	8.47102e-10	0.250192	0.639	0.476	2.37172e-05	E15.5-4
Rprm	5.6468e-66	1.67341	0.854	0.407	1.58099e-61	E15.5-5
Ap1s2	1.44459e-63	1.65773	0.93	0.622	4.04456e-59	E15.5-5
Tac2	3.19329e-172	1.56395	0.546	0.019	8.94056e-168	E15.5-5
Nhlh2	2.58822e-77	1.5155	0.935	0.502	7.24651e-73	E15.5-5
Gm27199	1.82461e-163	1.16254	0.859	0.109	5.10854e-159	E15.5-5
Sox14	7.38562e-81	1.02261	0.859	0.242	2.06783e-76	E15.5-5
Pgrmc1	5.39644e-57	0.992789	1	0.992	1.5109e-52	E15.5-5
Mrps11	3.98508e-51	0.97106	0.908	0.597	1.11574e-46	E15.5-5
Lhx5	2.25493e-144	0.942171	0.832	0.118	6.31334e-140	E15.5-5
Cited2	2.59432e-44	0.930235	0.854	0.515	7.26357e-40	E15.5-5
Gadd45g	3.67947e-35	0.917741	0.692	0.336	1.03018e-30	E15.5-5
B630019K06Rik	1.19722e-39	0.836845	0.935	0.786	3.35199e-35	E15.5-5
Pik3r1	1.78967e-24	0.801733	0.746	0.541	5.01072e-20	E15.5-5
Pou2f2	1.72277e-45	0.755382	0.968	0.767	4.82341e-41	E15.5-5
Etnk2	1.52157e-55	0.739828	0.568	0.149	4.26008e-51	E15.5-5
Rnf138rt1	1.91812e-43	0.703251	0.519	0.151	5.37036e-39	E15.5-5
Nrp2	1.02177e-38	0.697243	0.73	0.337	2.86075e-34	E15.5-5
Fos	4.69975e-17	0.695795	0.719	0.506	1.31583e-12	E15.5-5
Pcsk1n	3.1695e-41	0.676747	1	0.983	8.87398e-37	E15.5-5
App	9.55965e-36	0.660263	0.946	0.798	2.67651e-31	E15.5-5
Kcnk2	1.00704e-23	0.643894	0.703	0.452	2.81951e-19	E15.5-5
Pcp4	2.22757e-18	0.642429	0.784	0.595	6.23675e-14	E15.5-5
Nkx2-1	5.42087e-35	0.631424	0.984	0.689	1.51774e-30	E15.5-5
Mrap2	2.42135e-114	0.595321	0.476	0.032	6.77929e-110	E15.5-5
Tppp3	1.36664e-25	0.58553	0.832	0.55	3.82632e-21	E15.5-5
Efnb1	6.85621e-21	0.555065	0.719	0.466	1.9196e-16	E15.5-5
Zfhx3	1.52645e-32	0.552621	0.946	0.723	4.27376e-28	E15.5-5
Chst2	8.00474e-31	0.535874	0.541	0.188	2.24117e-26	E15.5-5
Gria1	6.52798e-23	0.524546	0.681	0.428	1.82771e-18	E15.5-5
H1f0	6.1721e-13	0.520133	0.762	0.683	1.72806e-08	E15.5-5
Chgb	2.41494e-36	0.512177	0.919	0.668	6.76136e-32	E15.5-5
Hs3st4	1.33432e-44	0.510516	0.378	0.071	3.73584e-40	E15.5-5
Ar	9.20085e-41	0.503	0.405	0.092	2.57605e-36	E15.5-5
Nup62cl	7.4066e-36	0.502724	0.351	0.073	2.0737e-31	E15.5-5
Adgrl3	2.11597e-23	0.501703	0.741	0.485	5.92428e-19	E15.5-5
Irs4	6.84936e-32	0.496458	0.389	0.103	1.91768e-27	E15.5-5
Hs6st2	1.1611e-22	0.49538	0.541	0.247	3.25086e-18	E15.5-5
Tmem163	1.08152e-40	0.495125	0.719	0.272	3.02803e-36	E15.5-5
Mum1l1	3.90557e-29	0.491513	0.281	0.059	1.09348e-24	E15.5-5
Tbx3	1.55742e-14	0.482139	0.719	0.512	4.36048e-10	E15.5-5
Gem	1.19016e-17	0.468049	0.324	0.113	3.3322e-13	E15.5-5
Btg1	4.84444e-19	0.45808	0.914	0.772	1.35635e-14	E15.5-5
Kcnc1	1.50139e-19	0.443057	0.665	0.421	4.20359e-15	E15.5-5
Fam155a	7.45181e-16	0.429753	0.654	0.436	2.08636e-11	E15.5-5
Ahi1	9.7958e-21	0.423186	0.968	0.87	2.74263e-16	E15.5-5
Zcchc12	1.37131e-14	0.398233	0.941	0.868	3.8394e-10	E15.5-5
Foxg1	1.34178e-23	0.395623	0.162	0.022	3.7567e-19	E15.5-5
Npas4	1.9916e-13	0.393836	0.314	0.13	5.57607e-09	E15.5-5
Btg2	8.04734e-13	0.392074	0.459	0.247	2.25309e-08	E15.5-5
Lin7a	1.23662e-14	0.380763	0.524	0.303	3.46228e-10	E15.5-5
Sox2	5.035e-11	0.37965	0.692	0.491	1.4097e-06	E15.5-5
Gm28040	8.26535e-80	0.37914	0.227	0.004	2.31413e-75	E15.5-5
Plp1	1.17042e-18	0.373253	0.584	0.298	3.27695e-14	E15.5-5
3632451O06Rik	7.88935e-27	0.371146	0.422	0.139	2.20886e-22	E15.5-5
Igfbpl1	1.7212e-12	0.362702	0.73	0.506	4.81901e-08	E15.5-5
Sorcs3	3.73957e-20	0.361483	0.357	0.126	1.04701e-15	E15.5-5
Srgap3	1.26765e-11	0.359423	0.67	0.524	3.54918e-07	E15.5-5
Pde10a	4.43074e-13	0.358343	0.514	0.305	1.24052e-08	E15.5-5
Nav2	1.08826e-12	0.357968	0.535	0.343	3.04692e-08	E15.5-5
Vwc2	1.28334e-16	0.355409	0.254	0.077	3.59311e-12	E15.5-5
Nr4a1	1.0696e-13	0.354201	0.292	0.111	2.99467e-09	E15.5-5
Xpr1	5.58436e-15	0.352987	0.914	0.795	1.56351e-10	E15.5-5
Dgkk	1.45428e-20	0.350807	0.286	0.082	4.07169e-16	E15.5-5
Unc5d	5.24227e-12	0.346585	0.454	0.265	1.46773e-07	E15.5-5
Socs2	9.06233e-09	0.341426	0.503	0.346	0.000253727	E15.5-5
Ramp3	8.78796e-25	0.335431	0.232	0.046	2.46045e-20	E15.5-5
Nr5a2	8.7228e-20	0.335235	0.292	0.087	2.44221e-15	E15.5-5
Rgs4	0.000153078	0.331815	0.508	0.403	1	E15.5-5
Resp18	1.20158e-09	0.330903	0.827	0.705	3.36419e-05	E15.5-5
Adcy1	2.09879e-17	0.330834	0.33	0.121	5.8762e-13	E15.5-5
Cdh8	4.16645e-20	0.326864	0.314	0.099	1.16652e-15	E15.5-5
Rap2c	8.25028e-12	0.326547	0.389	0.207	2.30991e-07	E15.5-5
H3f3b	5.04242e-25	0.319741	1	1	1.41178e-20	E15.5-5
Chl1	2.70941e-12	0.314514	0.605	0.363	7.5858e-08	E15.5-5
Plekha6	4.95659e-15	0.31412	0.422	0.201	1.38775e-10	E15.5-5
Zdbf2	7.54839e-13	0.312522	0.892	0.732	2.1134e-08	E15.5-5
Sema6a	1.09077e-12	0.312451	0.708	0.496	3.05393e-08	E15.5-5
Msi2	7.88572e-12	0.311753	0.719	0.532	2.20784e-07	E15.5-5
Ypel3	3.06733e-13	0.307465	0.924	0.876	8.5879e-09	E15.5-5
Arl6ip6	4.48679e-08	0.307354	0.611	0.472	0.00125621	E15.5-5
Mef2c	1.01389e-06	0.305337	0.222	0.109	0.0283869	E15.5-5
Esr1	6.36342e-42	0.304803	0.216	0.02	1.78163e-37	E15.5-5
Crtac1	7.71502e-17	0.303115	0.459	0.207	2.16005e-12	E15.5-5
Mad2l2	3.22617e-14	0.298167	0.876	0.725	9.03263e-10	E15.5-5
Zfos1	2.93639e-08	0.297424	0.914	0.886	0.000822132	E15.5-5
Miat	4.34964e-12	0.292373	0.757	0.584	1.21781e-07	E15.5-5
Junb	0.000106831	0.283646	0.438	0.316	1	E15.5-5
Fosb	3.34694e-09	0.280899	0.351	0.183	9.37075e-05	E15.5-5
Map2	2.5466e-12	0.279425	0.951	0.885	7.12998e-08	E15.5-5
Brinp1	2.4847e-07	0.278254	0.546	0.412	0.00695667	E15.5-5
6330403K07Rik	7.49391e-18	0.276277	0.995	0.985	2.09815e-13	E15.5-5
Kcnd2	5.2646e-08	0.276085	0.357	0.208	0.00147398	E15.5-5
Tmeff2	0.00156435	0.272179	0.632	0.557	1	E15.5-5
Tmem35	0.000145615	0.269499	0.595	0.489	1	E15.5-5
Htatsf1	7.39098e-07	0.269319	0.562	0.464	0.0206933	E15.5-5
Zbtb20	8.84762e-08	0.268937	0.87	0.801	0.00247716	E15.5-5
Sox1	4.31206e-08	0.268512	0.622	0.459	0.00120729	E15.5-5
Dusp26	2.18243e-09	0.266411	0.816	0.641	6.11037e-05	E15.5-5
Insm1	2.56049e-10	0.264049	0.4	0.207	7.16886e-06	E15.5-5
Zrsr2	2.67205e-06	0.260791	0.589	0.501	0.074812	E15.5-5
Lsamp	3.61222e-10	0.260544	0.735	0.549	1.01135e-05	E15.5-5
Sox3	1.93127e-06	0.259946	0.395	0.258	0.0540716	E15.5-5
Gng4	9.39443e-10	0.257686	0.486	0.307	2.63025e-05	E15.5-5
Tmx4	7.62539e-10	0.25689	0.849	0.746	2.13496e-05	E15.5-5
Sobp	2.57411e-08	0.256762	0.692	0.558	0.000720699	E15.5-5
Pja1	9.28765e-08	0.255823	0.914	0.883	0.00260035	E15.5-5
Pnmal1	1.87559e-10	0.253996	0.67	0.494	5.25127e-06	E15.5-5
Pi16	1.03149e-11	0.253628	0.438	0.247	2.88797e-07	E15.5-5
Cadm1	1.86259e-09	0.252825	0.827	0.621	5.21489e-05	E15.5-5
Zcchc16	6.07528e-51	0.251641	0.205	0.012	1.70096e-46	E15.5-5
Rnf32	2.36281e-12	0.251077	0.319	0.143	6.61539e-08	E15.5-5
S100a10	3.46772e-41	1.02798	0.857	0.475	9.70892e-37	E15.5-6
Arhgdig	1.78869e-30	0.820197	0.773	0.422	5.00797e-26	E15.5-6
Snca	4.88802e-23	0.793797	0.695	0.356	1.36855e-18	E15.5-6
Gm2694	7.83735e-50	0.730214	0.87	0.34	2.1943e-45	E15.5-6
Cbln1	4.48335e-61	0.724154	0.831	0.241	1.25525e-56	E15.5-6
Fezf1	2.25318e-57	0.723506	0.403	0.051	6.30846e-53	E15.5-6
Cd44	4.70328e-61	0.688826	0.383	0.043	1.31683e-56	E15.5-6
Rac3	2.32367e-33	0.67047	0.974	0.798	6.50581e-29	E15.5-6
Vim	6.2004e-17	0.664827	0.792	0.585	1.73599e-12	E15.5-6
Tagln2	1.87802e-13	0.631889	0.565	0.346	5.25807e-09	E15.5-6
Robo2	2.28294e-46	0.62724	0.812	0.299	6.39178e-42	E15.5-6
Lxn	1.49565e-33	0.626039	0.617	0.233	4.18753e-29	E15.5-6
Sox14	7.48623e-50	0.622804	0.864	0.252	2.09599e-45	E15.5-6
D930028M14Rik	3.38654e-08	0.622028	0.377	0.207	0.000948162	E15.5-6
Vstm2a	2.95585e-64	0.620507	0.695	0.161	8.27578e-60	E15.5-6
Nefl	2.6509e-16	0.62041	0.656	0.385	7.42198e-12	E15.5-6
Tspan17	7.38087e-30	0.585674	0.682	0.324	2.0665e-25	E15.5-6
Rbp1	3.63172e-20	0.584128	0.773	0.467	1.01681e-15	E15.5-6
Mgst3	3.54147e-23	0.575836	0.877	0.681	9.91542e-19	E15.5-6
Hpcal1	1.20983e-26	0.563969	0.799	0.443	3.38729e-22	E15.5-6
H2-Ab1	3.7895e-36	0.517417	0.338	0.058	1.06098e-31	E15.5-6
Snhg11	2.90312e-12	0.513141	0.818	0.648	8.12816e-08	E15.5-6
Nnat	1.71087e-38	0.512022	1	1	4.7901e-34	E15.5-6
Nr2f2	2.56309e-06	0.511702	0.279	0.144	0.0717615	E15.5-6
Rbfox1	3.7352e-34	0.505807	0.799	0.34	1.04578e-29	E15.5-6
Islr2	2.35055e-25	0.497661	0.851	0.482	6.58106e-21	E15.5-6
Pcbd1	1.0127e-19	0.47188	0.786	0.514	2.83536e-15	E15.5-6
Serf1	6.1571e-35	0.441119	0.994	0.953	1.72386e-30	E15.5-6
Stmn2	2.1685e-33	0.440905	0.994	0.976	6.07136e-29	E15.5-6
Ina	1.2297e-22	0.438808	0.948	0.911	3.44292e-18	E15.5-6
Gap43	3.02764e-22	0.433492	0.987	0.961	8.4768e-18	E15.5-6
Reep5	2.10149e-21	0.432785	0.968	0.867	5.88376e-17	E15.5-6
Rps26	2.08447e-38	0.432726	0.994	0.996	5.83609e-34	E15.5-6
Rplp0	4.94716e-46	0.42843	1	0.998	1.38511e-41	E15.5-6
Rpl10	4.48788e-42	0.422424	1	1	1.25652e-37	E15.5-6
Ap1s2	1.52098e-24	0.421566	0.89	0.63	4.25843e-20	E15.5-6
Nell2	2.0154e-21	0.421244	0.864	0.536	5.64271e-17	E15.5-6
Mapk3	1.36074e-22	0.420795	0.883	0.626	3.80979e-18	E15.5-6
Tmeff1	7.27074e-23	0.416951	0.935	0.821	2.03566e-18	E15.5-6
Arxes2	1.04686e-21	0.413685	0.935	0.823	2.93099e-17	E15.5-6
Fam131c	7.61408e-29	0.407012	0.682	0.269	2.13179e-24	E15.5-6
Sncb	1.81374e-13	0.405122	0.532	0.276	5.07812e-09	E15.5-6
Mapt	9.81693e-25	0.401623	0.987	0.928	2.74854e-20	E15.5-6
Nptx2	1.1247e-24	0.397998	0.643	0.249	3.14892e-20	E15.5-6
Cdh13	4.96348e-34	0.397042	0.617	0.19	1.38968e-29	E15.5-6
Rnd3	1.54311e-15	0.394818	0.779	0.429	4.32039e-11	E15.5-6
Spock1	1.30858e-24	0.389306	0.565	0.208	3.66376e-20	E15.5-6
Enho	1.38153e-17	0.38711	0.766	0.496	3.86801e-13	E15.5-6
Cnrip1	2.84215e-19	0.382943	0.922	0.755	7.95745e-15	E15.5-6
Mif	4.5985e-22	0.378604	1	0.986	1.28749e-17	E15.5-6
Nkain3	5.67869e-36	0.376215	0.578	0.165	1.58992e-31	E15.5-6
Pomc	1.14165e-06	0.374985	1	1	0.031964	E15.5-6
Stmn4	1.67578e-15	0.374137	0.981	0.931	4.69184e-11	E15.5-6
Stx1a	7.48864e-16	0.372047	0.747	0.44	2.09667e-11	E15.5-6
Nkx2-1	4.6031e-15	0.371227	0.955	0.696	1.28877e-10	E15.5-6
Ank2	2.0719e-17	0.369938	0.903	0.723	5.80091e-13	E15.5-6
Sms	1.15708e-20	0.369163	0.974	0.841	3.2396e-16	E15.5-6
Cntnap2	4.42528e-19	0.367314	0.779	0.446	1.23899e-14	E15.5-6
Kcnk2	7.92261e-19	0.364021	0.805	0.448	2.21817e-14	E15.5-6
Rps7	1.63441e-39	0.356039	1	0.998	4.57602e-35	E15.5-6
Sox2	1.09086e-18	0.353741	0.883	0.479	3.0542e-14	E15.5-6
Rpl38	6.03369e-38	0.350681	1	0.999	1.68931e-33	E15.5-6
Eef2	3.74144e-31	0.350017	1	0.999	1.04753e-26	E15.5-6
Shtn1	5.29432e-21	0.348457	0.74	0.358	1.4823e-16	E15.5-6
Rpl23	6.08869e-39	0.347832	1	0.998	1.70471e-34	E15.5-6
Sepw1	6.69636e-27	0.34526	1	0.998	1.87485e-22	E15.5-6
Ucp2	1.19348e-07	0.345014	0.532	0.352	0.00334151	E15.5-6
Eef1g	7.54814e-37	0.343009	1	0.996	2.11333e-32	E15.5-6
Pgm2l1	1.75213e-14	0.339409	0.636	0.367	4.90562e-10	E15.5-6
Atp6v1g2	7.52247e-16	0.339354	0.779	0.48	2.10614e-11	E15.5-6
Gnao1	1.87575e-17	0.339324	0.929	0.748	5.25171e-13	E15.5-6
Gm8773	3.56025e-40	0.333109	0.506	0.116	9.96798e-36	E15.5-6
Arxes1	6.71805e-15	0.329528	0.896	0.752	1.88092e-10	E15.5-6
Xpr1	4.95566e-17	0.328511	0.961	0.793	1.38748e-12	E15.5-6
Zfos1	2.79837e-13	0.327337	0.948	0.884	7.83488e-09	E15.5-6
Rpl36a	6.62487e-23	0.327246	1	0.987	1.85483e-18	E15.5-6
C1qtnf4	9.39573e-15	0.327197	0.929	0.73	2.63062e-10	E15.5-6
Rpl35	5.42367e-33	0.325124	1	0.996	1.51852e-28	E15.5-6
Snrpn	9.48998e-22	0.323309	0.987	0.973	2.657e-17	E15.5-6
Tubb2b	4.63561e-19	0.323221	1	0.999	1.29788e-14	E15.5-6
Gm8730	2.42558e-15	0.319506	0.916	0.729	6.79114e-11	E15.5-6
Fabp5	1.36058e-19	0.319358	1	0.973	3.80935e-15	E15.5-6
Tmsb10	1.07376e-26	0.318748	1	1	3.00632e-22	E15.5-6
Guk1	1.26048e-12	0.318581	0.877	0.758	3.52909e-08	E15.5-6
Rpl32	1.25187e-26	0.314782	1	0.997	3.50497e-22	E15.5-6
Calm3	9.30765e-19	0.313432	0.994	0.986	2.60596e-14	E15.5-6
Rpl17	3.41514e-30	0.31193	1	0.999	9.56172e-26	E15.5-6
Nt5dc3	3.07971e-31	0.311885	0.636	0.206	8.62257e-27	E15.5-6
Bok	7.09704e-16	0.310448	0.74	0.396	1.98703e-11	E15.5-6
Chrna4	1.78035e-29	0.309441	0.656	0.225	4.98462e-25	E15.5-6
Syt4	2.78772e-10	0.307647	0.864	0.714	7.80507e-06	E15.5-6
Dpysl4	1.01763e-13	0.305677	0.883	0.637	2.84917e-09	E15.5-6
Cnr1	3.87318e-19	0.304291	0.721	0.361	1.08441e-14	E15.5-6
Ubash3b	1.04053e-17	0.303506	0.468	0.186	2.91329e-13	E15.5-6
Camkv	1.44415e-21	0.302777	0.682	0.283	4.04334e-17	E15.5-6
Fabp3	3.73687e-10	0.301845	0.786	0.602	1.04625e-05	E15.5-6
Calm2	1.89666e-14	0.299839	1	0.999	5.31026e-10	E15.5-6
Rps3a1	1.06491e-26	0.299239	1	0.996	2.98152e-22	E15.5-6
Mpped2	1.36007e-07	0.299198	0.883	0.82	0.00380794	E15.5-6
Chga	1.63165e-10	0.29771	0.675	0.426	4.5683e-06	E15.5-6
Hs3st5	5.10572e-42	0.29687	0.474	0.094	1.4295e-37	E15.5-6
Cgref1	9.944e-14	0.295709	0.61	0.336	2.78412e-09	E15.5-6
Pebp1	5.26043e-27	0.292936	1	0.996	1.47282e-22	E15.5-6
Rpl39	1.19598e-23	0.2929	1	0.999	3.3485e-19	E15.5-6
Rps12	6.22971e-20	0.291863	1	0.992	1.74419e-15	E15.5-6
Rps8	3.14441e-27	0.29173	1	0.999	8.80371e-23	E15.5-6
Mien1	1.88918e-14	0.290806	0.903	0.801	5.28933e-10	E15.5-6
Nr5a1	1.37867e-39	0.290522	0.597	0.148	3.85999e-35	E15.5-6
Myl12b	2.53447e-13	0.288325	0.955	0.869	7.09602e-09	E15.5-6
Eif3f	2.85094e-21	0.288195	1	0.99	7.98207e-17	E15.5-6
Syt16	4.27262e-16	0.28781	0.805	0.476	1.19625e-11	E15.5-6
Eef1b2	1.40555e-17	0.287737	1	0.986	3.93526e-13	E15.5-6
Prr13	2.99107e-14	0.286985	0.896	0.653	8.37439e-10	E15.5-6
Gsto1	3.52421e-16	0.286688	0.76	0.428	9.86709e-12	E15.5-6
Snhg12	3.77135e-12	0.285246	0.825	0.569	1.0559e-07	E15.5-6
Gnai1	2.53585e-15	0.284415	0.61	0.317	7.09988e-11	E15.5-6
Eef1a1	5.91913e-33	0.283324	1	0.999	1.65724e-28	E15.5-6
Prkar1b	6.49483e-13	0.281859	0.844	0.633	1.81842e-08	E15.5-6
Stmn3	1.80494e-20	0.28082	1	0.987	5.05347e-16	E15.5-6
Rps19	5.49534e-23	0.280048	1	0.998	1.53859e-18	E15.5-6
Rpl37	1.64979e-24	0.27966	1	0.999	4.61907e-20	E15.5-6
Acot7	8.0425e-11	0.279298	0.903	0.753	2.25174e-06	E15.5-6
Hcfc1r1	1.08706e-12	0.279292	0.922	0.81	3.04355e-08	E15.5-6
Grb10	5.6875e-10	0.278452	0.552	0.316	1.59239e-05	E15.5-6
Nsg1	5.39261e-16	0.277557	0.994	0.968	1.50982e-11	E15.5-6
Rps6	3.28849e-23	0.277551	1	0.997	9.20712e-19	E15.5-6
Rtn1	6.12512e-23	0.277523	1	1	1.71491e-18	E15.5-6
Rprm	8.29778e-05	0.276876	0.604	0.435	1	E15.5-6
Rpl29	3.79428e-26	0.276607	1	0.996	1.06232e-21	E15.5-6
Ablim1	6.80842e-28	0.27417	0.487	0.144	1.90622e-23	E15.5-6
Plp1	9.20097e-13	0.273175	0.597	0.302	2.57609e-08	E15.5-6
Fam19a2	4.39264e-12	0.272788	0.506	0.24	1.22985e-07	E15.5-6
Rpl21	1.37054e-23	0.271368	1	0.999	3.83723e-19	E15.5-6
Pkia	2.23209e-11	0.270052	0.909	0.698	6.24942e-07	E15.5-6
Tspan7	1.9959e-08	0.269747	0.844	0.694	0.000558813	E15.5-6
Wbscr17	2.1694e-25	0.269545	0.526	0.166	6.07389e-21	E15.5-6
Alcam	1.23261e-12	0.268981	0.474	0.214	3.45107e-08	E15.5-6
Rpl31	2.06772e-22	0.268082	1	0.998	5.7892e-18	E15.5-6
Fam57b	2.22258e-12	0.267485	0.942	0.792	6.22278e-08	E15.5-6
Pea15a	1.26276e-15	0.266745	0.974	0.869	3.53548e-11	E15.5-6
Clec2l	2.96957e-20	0.265488	0.532	0.208	8.3142e-16	E15.5-6
Rpsa	1.34373e-23	0.265282	1	0.998	3.76217e-19	E15.5-6
Rps5	4.29863e-25	0.265213	1	1	1.20353e-20	E15.5-6
Mtch1	9.72924e-15	0.265059	0.974	0.96	2.72399e-10	E15.5-6
Sh3bgrl3	1.64366e-10	0.264105	0.935	0.832	4.60192e-06	E15.5-6
Rps24	5.6435e-25	0.26381	1	0.999	1.58007e-20	E15.5-6
Rpl23a	1.62797e-16	0.263155	0.994	0.995	4.55798e-12	E15.5-6
Uchl3	1.4091e-11	0.26061	0.896	0.752	3.9452e-07	E15.5-6
Rpl6	4.37134e-24	0.2603	1	0.998	1.22389e-19	E15.5-6
Stk32c	9.10993e-20	0.259077	0.578	0.237	2.5506e-15	E15.5-6
Rps18	7.48626e-20	0.258823	1	1	2.096e-15	E15.5-6
Map1lc3a	1.28818e-12	0.257849	0.987	0.976	3.60666e-08	E15.5-6
Rell2	2.32555e-17	0.256742	0.591	0.257	6.51108e-13	E15.5-6
Rpl12	5.18181e-16	0.256298	0.994	0.988	1.4508e-11	E15.5-6
Rps4x	2.14799e-20	0.255059	1	0.998	6.01393e-16	E15.5-6
Rpl14	2.45555e-23	0.254115	1	0.998	6.87505e-19	E15.5-6
Pfkp	2.50698e-26	0.252919	0.565	0.186	7.01905e-22	E15.5-6
Gng2	6.09433e-12	0.252337	0.981	0.885	1.70629e-07	E15.5-6
Cox7a2l	9.06659e-15	0.251513	0.994	0.976	2.53846e-10	E15.5-6
March1	7.21411e-15	0.25137	0.591	0.275	2.01981e-10	E15.5-6
Dlx5	1.4134e-237	1.41215	0.843	0.025	3.95724e-233	E15.5-7
Cited1	1.49091e-33	1.19536	0.912	0.485	4.17426e-29	E15.5-7
Dlx6	1.5328e-234	0.928943	0.745	0.015	4.29154e-230	E15.5-7
Dlx2	1.84745e-158	0.870435	0.676	0.029	5.17249e-154	E15.5-7
Hmx2	3.92315e-103	0.806095	0.471	0.022	1.0984e-98	E15.5-7
Pik3r1	5.33572e-14	0.768733	0.725	0.551	1.49389e-09	E15.5-7
Nrxn3	2.24881e-27	0.729141	0.824	0.396	6.29623e-23	E15.5-7
Pou2f2	1.87676e-29	0.723421	1	0.774	5.25455e-25	E15.5-7
Zfos1	4.81514e-20	0.717758	0.99	0.883	1.34814e-15	E15.5-7
Dlx1	1.12181e-112	0.70676	0.559	0.031	3.14084e-108	E15.5-7
Rgs4	1.94529e-24	0.679659	0.814	0.391	5.44642e-20	E15.5-7
Dlk1	2.19578e-17	0.678613	0.922	0.706	6.14774e-13	E15.5-7
Gad1	5.70107e-46	0.63615	0.696	0.161	1.59618e-41	E15.5-7
Asb4	2.28423e-21	0.607243	0.804	0.404	6.39538e-17	E15.5-7
Kcnip1	6.40723e-23	0.550468	0.775	0.365	1.7939e-18	E15.5-7
Slc32a1	1.60498e-35	0.516099	0.647	0.16	4.49362e-31	E15.5-7
Cd24a	2.66357e-23	0.514841	1	0.965	7.45747e-19	E15.5-7
Zdbf2	3.56233e-12	0.513362	0.941	0.736	9.9738e-08	E15.5-7
Csrp2	2.74944e-09	0.500604	0.725	0.597	7.69788e-05	E15.5-7
Barhl2	8.03902e-20	0.490557	0.245	0.043	2.25076e-15	E15.5-7
Frat2	3.42548e-13	0.474705	0.627	0.36	9.59066e-09	E15.5-7
Tekt1	9.6775e-36	0.465635	0.51	0.105	2.70951e-31	E15.5-7
Scg2	4.75426e-08	0.456698	0.696	0.506	0.0013311	E15.5-7
1500035N22Rik	3.94269e-16	0.445341	0.696	0.354	1.10388e-11	E15.5-7
Bub3	5.13323e-11	0.443412	0.863	0.726	1.4372e-06	E15.5-7
Nrsn2	4.75031e-14	0.43364	0.863	0.629	1.32999e-09	E15.5-7
Zcchc12	2.5594e-10	0.431658	0.99	0.869	7.1658e-06	E15.5-7
BC048546	2.19557e-38	0.429326	0.324	0.037	6.14714e-34	E15.5-7
Rem2	2.69776e-11	0.428114	0.569	0.322	7.55318e-07	E15.5-7
Chd3os	2.60447e-14	0.418212	0.951	0.811	7.29199e-10	E15.5-7
Zfhx3	1.86535e-12	0.415575	0.941	0.733	5.2226e-08	E15.5-7
H2afz	1.74551e-19	0.388709	1	0.995	4.88707e-15	E15.5-7
A730017C20Rik	6.91351e-10	0.380604	0.873	0.752	1.93564e-05	E15.5-7
Nrp2	8.5066e-13	0.37356	0.667	0.356	2.38168e-08	E15.5-7
Sesn3	1.04688e-11	0.371291	0.618	0.372	2.93106e-07	E15.5-7
Wbp5	4.77856e-14	0.369332	0.99	0.979	1.3379e-09	E15.5-7
Jun	3.57275e-05	0.368627	0.745	0.669	1	E15.5-7
Ecel1	1.621e-13	0.363791	0.51	0.211	4.53847e-09	E15.5-7
Ahi1	7.08119e-11	0.358502	0.971	0.873	1.98259e-06	E15.5-7
Btg1	2.07781e-06	0.352866	0.853	0.781	0.0581746	E15.5-7
Pkig	5.92512e-11	0.352788	0.843	0.681	1.65892e-06	E15.5-7
Tspan7	1.83107e-09	0.345016	0.873	0.696	5.12662e-05	E15.5-7
Sox4	2.64647e-10	0.338028	1	0.954	7.40959e-06	E15.5-7
Irs4	1.70759e-10	0.335018	0.324	0.118	4.78092e-06	E15.5-7
Ralyl	6.91192e-09	0.329617	0.667	0.459	0.00019352	E15.5-7
Zfhx4	5.13814e-09	0.328876	0.618	0.404	0.000143858	E15.5-7
Tbx3	1.54812e-09	0.324948	0.833	0.515	4.33444e-05	E15.5-7
Flywch2	1.07785e-08	0.31448	0.706	0.5	0.000301778	E15.5-7
Tagln3	1.15805e-10	0.307089	0.99	0.932	3.24231e-06	E15.5-7
Klf5	2.15819e-12	0.305733	0.324	0.109	6.04251e-08	E15.5-7
Eif4b	8.02136e-10	0.304939	0.931	0.753	2.24582e-05	E15.5-7
Hap1	1.80155e-10	0.302219	0.99	0.921	5.04398e-06	E15.5-7
Mad2l2	7.83885e-09	0.300688	0.892	0.73	0.000219472	E15.5-7
Zdhhc2	1.74521e-06	0.299866	0.5	0.339	0.0488623	E15.5-7
Nmral1	3.95182e-06	0.299677	0.549	0.402	0.110643	E15.5-7
Pak1	5.76869e-06	0.299135	0.814	0.695	0.161512	E15.5-7
Gnb2l1	8.68855e-14	0.297613	1	0.989	2.43262e-09	E15.5-7
Pou6f2	5.36092e-08	0.293742	0.294	0.121	0.00150095	E15.5-7
Tcf7l2	7.5127e-14	0.293548	0.686	0.363	2.10341e-09	E15.5-7
Tmem29	6.13925e-07	0.293142	0.765	0.604	0.0171887	E15.5-7
Cks1b	0.00073149	0.292648	0.49	0.387	1	E15.5-7
Celf6	2.04464e-10	0.288248	0.882	0.637	5.72458e-06	E15.5-7
Eef1a2	2.36561e-07	0.286281	0.775	0.614	0.00662323	E15.5-7
Pde2a	1.08055e-10	0.285155	0.461	0.199	3.02533e-06	E15.5-7
Hmgn1	7.48129e-15	0.283802	1	0.994	2.09461e-10	E15.5-7
Snrpg	7.03294e-13	0.282597	1	0.984	1.96908e-08	E15.5-7
Nudt11	8.47748e-07	0.279584	0.794	0.67	0.0237353	E15.5-7
Mtf2	2.70498e-07	0.277664	0.735	0.569	0.00757339	E15.5-7
Nrsn1	1.52892e-06	0.275692	0.627	0.452	0.0428068	E15.5-7
Pnmal2	9.38287e-06	0.274948	0.873	0.818	0.262702	E15.5-7
Ubash3b	6.92687e-07	0.274004	0.373	0.198	0.0193938	E15.5-7
Rnaseh2c	1.73366e-06	0.271602	0.598	0.446	0.0485391	E15.5-7
Rps5	2.26681e-14	0.270531	1	1	6.34662e-10	E15.5-7
Sh3gl3	4.60176e-06	0.267104	0.529	0.364	0.12884	E15.5-7
Nudt10	7.78713e-07	0.264486	0.745	0.609	0.0218024	E15.5-7
Gkap1	0.000665602	0.264363	0.569	0.493	1	E15.5-7
St7	0.000206646	0.258309	0.549	0.435	1	E15.5-7
Snhg12	0.00254767	0.257997	0.637	0.585	1	E15.5-7
Wdr34	1.19162e-06	0.257443	0.608	0.431	0.033363	E15.5-7
Nfkbia	0.000431168	0.257202	0.471	0.338	1	E15.5-7
Gad2	7.94194e-15	0.256539	0.294	0.076	2.22359e-10	E15.5-7
Ccdc34	6.38784e-06	0.256042	0.706	0.599	0.178847	E15.5-7
Smarcd3	3.13189e-05	0.255486	0.902	0.789	0.876868	E15.5-7
6330403K07Rik	4.47629e-08	0.252502	1	0.985	0.00125327	E15.5-7
Rtf1	7.01255e-06	0.251948	0.892	0.819	0.196337	E15.5-7
Col3a1	1.82438e-131	3.59446	0.753	0.06	5.1079e-127	E15.5-8
Fabp7	1.05419e-23	3.27563	0.381	0.088	2.95151e-19	E15.5-8
Col1a2	1.45773e-155	3.0971	0.742	0.043	4.08136e-151	E15.5-8
Vtn	2.63391e-177	2.89977	0.722	0.03	7.37442e-173	E15.5-8
Sparc	9.982e-192	2.89402	0.948	0.063	2.79476e-187	E15.5-8
Cxcl12	1.2728e-178	2.86803	0.742	0.032	3.56357e-174	E15.5-8
Lgals1	3.31291e-174	2.84532	0.784	0.04	9.27549e-170	E15.5-8
Col1a1	1.53137e-202	2.80558	0.732	0.023	4.28754e-198	E15.5-8
Dcn	3.09736e-200	2.80269	0.722	0.022	8.67198e-196	E15.5-8
H19	6.65544e-113	2.66986	0.588	0.037	1.86339e-108	E15.5-8
Igfbp2	1.10649e-50	2.51374	0.948	0.529	3.09796e-46	E15.5-8
Ptn	1.23607e-55	2.49534	0.979	0.643	3.46075e-51	E15.5-8
Serpinh1	1.49558e-85	2.47285	0.969	0.263	4.18733e-81	E15.5-8
S100a6	2.96306e-218	2.3869	0.67	0.012	8.29596e-214	E15.5-8
Pltp	6.9717e-217	2.35863	0.763	0.022	1.95194e-212	E15.5-8
Atp1a2	1.52028e-252	2.34016	0.866	0.024	4.25648e-248	E15.5-8
Bgn	8.54285e-205	2.1618	0.711	0.02	2.39183e-200	E15.5-8
Col4a1	1.04912e-135	2.11371	0.732	0.051	2.93732e-131	E15.5-8
Sparcl1	1.39413e-102	2.09485	0.753	0.089	3.90329e-98	E15.5-8
Slc6a13	3.68099e-223	1.96567	0.711	0.015	1.0306e-218	E15.5-8
Dbi	6.34917e-37	1.9518	0.938	0.534	1.77764e-32	E15.5-8
Gja1	8.60938e-270	1.93442	0.825	0.016	2.41045e-265	E15.5-8
Vim	8.36349e-60	1.89464	1	0.581	2.34161e-55	E15.5-8
Mdk	1.34746e-98	1.89413	0.979	0.198	3.77263e-94	E15.5-8
S100a11	3.62016e-92	1.88386	0.907	0.167	1.01357e-87	E15.5-8
Ptgds	3.45398e-14	1.85368	0.289	0.076	9.67046e-10	E15.5-8
Igf2	4.37862e-199	1.83751	0.68	0.018	1.22593e-194	E15.5-8
Cthrc1	1.49107e-126	1.8305	0.711	0.054	4.17469e-122	E15.5-8
Apod	6.31332e-223	1.82681	0.711	0.015	1.7676e-218	E15.5-8
Id3	3.57337e-154	1.82127	0.856	0.067	1.00047e-149	E15.5-8
Anxa2	6.85005e-207	1.80556	0.876	0.041	1.91788e-202	E15.5-8
Slc1a3	1.50558e-300	1.80522	0.918	0.018	4.21531e-296	E15.5-8
Sepp1	7.62092e-182	1.78985	0.856	0.046	2.1337e-177	E15.5-8
Ifitm2	1.71376e-94	1.77978	0.814	0.122	4.79818e-90	E15.5-8
Col4a2	1.44388e-136	1.75	0.701	0.045	4.04258e-132	E15.5-8
Lum	8.00938e-219	1.7389	0.68	0.013	2.24247e-214	E15.5-8
Nbl1	9.44846e-152	1.72172	0.763	0.047	2.64538e-147	E15.5-8
Rbp1	6.27517e-34	1.71844	0.856	0.471	1.75692e-29	E15.5-8
Igfbp4	1.67919e-68	1.71286	0.845	0.204	4.70139e-64	E15.5-8
Mfap4	4.20608e-107	1.69505	0.763	0.079	1.17762e-102	E15.5-8
Islr	1.39699e-261	1.68385	0.742	0.01	3.9113e-257	E15.5-8
Hes1	0	1.65605	0.918	0.014	0	E15.5-8
Hmgb2	5.77928e-20	1.62337	0.67	0.314	1.61808e-15	E15.5-8
Vamp5	5.08197e-250	1.60794	0.67	0.007	1.42285e-245	E15.5-8
Serpinf1	1.63375e-198	1.59776	0.66	0.016	4.57417e-194	E15.5-8
Phlda1	2.93069e-39	1.5598	0.763	0.306	8.20535e-35	E15.5-8
Laptm4a	2.69421e-40	1.54795	1	0.912	7.54325e-36	E15.5-8
Colec12	1.36372e-260	1.54109	0.701	0.007	3.81813e-256	E15.5-8
Rcn3	1.02698e-127	1.53889	0.814	0.077	2.87535e-123	E15.5-8
Itm2a	1.79253e-138	1.53482	0.825	0.069	5.01872e-134	E15.5-8
Ramp2	1.20421e-156	1.50985	0.701	0.034	3.37155e-152	E15.5-8
Mest	1.16291e-45	1.48901	0.918	0.413	3.25592e-41	E15.5-8
Gpc3	6.10612e-79	1.45772	0.763	0.128	1.70959e-74	E15.5-8
Col26a1	1.2489e-172	1.45267	0.742	0.034	3.49667e-168	E15.5-8
Gpx8	0	1.43229	0.959	0.009	0	E15.5-8
Emp3	6.37095e-231	1.42476	0.711	0.013	1.78374e-226	E15.5-8
Bmp7	5.18857e-101	1.418	0.732	0.082	1.4527e-96	E15.5-8
Myl12a	5.57227e-77	1.4123	0.938	0.246	1.56013e-72	E15.5-8
Col18a1	9.32744e-198	1.39693	0.66	0.016	2.6115e-193	E15.5-8
Mfap2	7.22416e-33	1.39404	0.918	0.672	2.02262e-28	E15.5-8
Cd63	6.88386e-46	1.38281	0.959	0.549	1.92734e-41	E15.5-8
Ppic	6.66513e-277	1.37365	0.814	0.013	1.8661e-272	E15.5-8
Anxa5	5.37835e-80	1.36535	0.887	0.182	1.50583e-75	E15.5-8
Zfp36l1	3.3355e-280	1.36225	0.907	0.021	9.33872e-276	E15.5-8
Fstl1	4.62086e-98	1.36075	0.938	0.172	1.29375e-93	E15.5-8
1810058I24Rik	1.99502e-37	1.36008	0.948	0.656	5.58565e-33	E15.5-8
Tbx18	3.77967e-294	1.30367	0.722	0.004	1.05823e-289	E15.5-8
Slc22a6	2.23554e-198	1.29787	0.588	0.009	6.25907e-194	E15.5-8
Nkd1	3.91057e-92	1.29589	0.722	0.086	1.09488e-87	E15.5-8
Cdkn1c	5.58594e-21	1.2821	0.866	0.65	1.56395e-16	E15.5-8
Nid2	7.79457e-254	1.27427	0.701	0.008	2.18232e-249	E15.5-8
Itih5	1.1478e-238	1.27169	0.639	0.006	3.2136e-234	E15.5-8
Col6a1	1.37883e-234	1.25361	0.67	0.009	3.86044e-230	E15.5-8
Zic1	4.23027e-82	1.24962	0.835	0.133	1.18439e-77	E15.5-8
Pcolce	1.91841e-188	1.24647	0.629	0.015	5.37116e-184	E15.5-8
Eva1b	3.87304e-214	1.24093	0.66	0.012	1.08437e-209	E15.5-8
Gjb6	3.16474e-194	1.2359	0.485	0.003	8.86065e-190	E15.5-8
Plat	3.75306e-138	1.22945	0.773	0.058	1.05078e-133	E15.5-8
Col6a2	3.4111e-225	1.19697	0.691	0.013	9.55039e-221	E15.5-8
Ier3	6.19777e-169	1.19151	0.68	0.026	1.73525e-164	E15.5-8
Cldn11	1.60857e-146	1.1759	0.495	0.012	4.50368e-142	E15.5-8
Timp3	1.83303e-201	1.17469	0.773	0.027	5.13212e-197	E15.5-8
Svil	5.8846e-185	1.15368	0.701	0.024	1.64757e-180	E15.5-8
Clic1	1.19799e-77	1.14743	0.938	0.209	3.35412e-73	E15.5-8
Fbln1	4.40573e-146	1.14588	0.629	0.028	1.23352e-141	E15.5-8
Arhgap29	2.05956e-234	1.13206	0.67	0.009	5.76635e-230	E15.5-8
Wnt4	9.37685e-114	1.12586	0.629	0.043	2.62533e-109	E15.5-8
Wls	5.32181e-156	1.12338	0.773	0.047	1.49e-151	E15.5-8
Nupr1	1.11126e-212	1.119	0.588	0.007	3.11129e-208	E15.5-8
Nkain4	1.15455e-74	1.11772	0.887	0.205	3.2325e-70	E15.5-8
Cd81	4.26485e-44	1.11632	1	0.891	1.19407e-39	E15.5-8
Rdh10	1.61306e-109	1.11377	0.639	0.048	4.51623e-105	E15.5-8
Fbn2	1.27077e-149	1.1007	0.649	0.029	3.55789e-145	E15.5-8
Fcgrt	1.3099e-234	1.0739	0.711	0.012	3.66746e-230	E15.5-8
Tmem150a	4.49031e-41	1.07168	0.691	0.208	1.2572e-36	E15.5-8
Copz2	5.86481e-288	1.06705	0.784	0.009	1.64203e-283	E15.5-8
Pmp22	1.50311e-249	1.06558	0.742	0.012	4.20839e-245	E15.5-8
Plpp3	2.74579e-122	1.06401	0.784	0.07	7.68765e-118	E15.5-8
Prdx4	7.55767e-39	1.06054	0.835	0.36	2.116e-34	E15.5-8
Mmp2	9.17778e-147	1.05308	0.691	0.037	2.56959e-142	E15.5-8
Ppib	3.12444e-41	1.04611	1	0.75	8.74782e-37	E15.5-8
Tpst1	3.51752e-60	1.04358	0.835	0.217	9.84834e-56	E15.5-8
Ube2c	3.37973e-40	1.03193	0.227	0.015	9.46258e-36	E15.5-8
Qk	5.25122e-33	1.03176	0.691	0.226	1.47024e-28	E15.5-8
Col5a2	2.818e-219	1.02691	0.722	0.017	7.88984e-215	E15.5-8
Apoe	5.23962e-93	1.0246	0.887	0.154	1.46699e-88	E15.5-8
Vamp8	1.01318e-205	1.01782	0.701	0.017	2.8367e-201	E15.5-8
Tpm4	6.88745e-41	1.01015	0.856	0.363	1.92835e-36	E15.5-8
Cald1	3.8169e-68	1.00511	0.763	0.145	1.06866e-63	E15.5-8
Flrt2	9.89336e-63	1.00424	0.67	0.116	2.76994e-58	E15.5-8
Ost4	3.09514e-48	0.997143	0.969	0.565	8.66578e-44	E15.5-8
Slc9a3r1	3.20265e-192	0.994766	0.711	0.023	8.96679e-188	E15.5-8
Lpar1	4.76494e-109	0.992998	0.732	0.07	1.33409e-104	E15.5-8
Rhoc	3.91453e-115	0.991885	0.856	0.098	1.09599e-110	E15.5-8
Tfpi	6.23488e-140	0.989015	0.66	0.035	1.74564e-135	E15.5-8
Tead2	1.99994e-209	0.982638	0.856	0.033	5.59944e-205	E15.5-8
Efemp2	3.31741e-155	0.980176	0.753	0.043	9.28807e-151	E15.5-8
Gpx7	2.07755e-61	0.979685	0.742	0.152	5.81673e-57	E15.5-8
Slc41a1	1.05882e-164	0.979543	0.763	0.04	2.96448e-160	E15.5-8
Hadh	1.37204e-143	0.979377	0.804	0.059	3.84144e-139	E15.5-8
Ccnd3	1.34536e-109	0.979182	0.918	0.127	3.76673e-105	E15.5-8
Cks2	6.92832e-24	0.975306	0.443	0.109	1.93979e-19	E15.5-8
Ifitm1	9.3228e-203	0.971251	0.536	0.005	2.6102e-198	E15.5-8
Vimp	1.08739e-32	0.970104	0.866	0.475	3.04447e-28	E15.5-8
Vstm4	9.10366e-239	0.961581	0.639	0.006	2.54884e-234	E15.5-8
Arl4a	1.36001e-26	0.959932	0.938	0.699	3.80777e-22	E15.5-8
Anxa6	8.91878e-136	0.958292	0.711	0.046	2.49708e-131	E15.5-8
Cnn3	1.43086e-38	0.956129	0.948	0.51	4.00612e-34	E15.5-8
Lamb1	3.3594e-240	0.950205	0.649	0.007	9.40565e-236	E15.5-8
Rplp1	8.7402e-51	0.946386	1	0.997	2.44708e-46	E15.5-8
Lhfp	1.26153e-161	0.943497	0.784	0.044	3.53204e-157	E15.5-8
Hist1h2ap	2.18899e-05	0.94092	0.237	0.105	0.612873	E15.5-8
Cnn2	6.37233e-197	0.940511	0.567	0.008	1.78413e-192	E15.5-8
Cst3	2.24652e-23	0.938887	0.99	0.92	6.28981e-19	E15.5-8
Olfml3	5.23799e-149	0.938698	0.567	0.018	1.46653e-144	E15.5-8
Rcn1	1.2949e-67	0.933162	0.907	0.241	3.62547e-63	E15.5-8
Grb10	3.05474e-52	0.921226	0.918	0.305	8.55266e-48	E15.5-8
Cmtm3	5.11549e-141	0.919714	0.732	0.046	1.43223e-136	E15.5-8
Acot1	2.30758e-90	0.915274	0.515	0.035	6.46075e-86	E15.5-8
Nr2f2	1.78344e-69	0.91028	0.753	0.125	4.99329e-65	E15.5-8
Rrbp1	3.84246e-54	0.910106	0.794	0.201	1.07581e-49	E15.5-8
Tmem100	1.00143e-174	0.909616	0.495	0.006	2.80382e-170	E15.5-8
Ngfr	3.28951e-127	0.908126	0.454	0.012	9.20997e-123	E15.5-8
Pdgfra	3.79651e-271	0.906043	0.68	0.004	1.06295e-266	E15.5-8
Itm2b	1.40264e-32	0.901034	0.969	0.849	3.92712e-28	E15.5-8
Angptl4	1.72832e-212	0.900087	0.608	0.008	4.83895e-208	E15.5-8
Mxra8	5.9224e-207	0.899986	0.639	0.012	1.65815e-202	E15.5-8
Tril	2.56081e-68	0.899214	0.722	0.121	7.16975e-64	E15.5-8
Rnf181	5.0638e-25	0.89733	0.773	0.42	1.41776e-20	E15.5-8
Add3	1.04944e-93	0.895833	0.784	0.1	2.93822e-89	E15.5-8
Cfh	3.68345e-214	0.889493	0.649	0.011	1.03129e-209	E15.5-8
Pcca	3.2399e-72	0.888946	0.691	0.106	9.07107e-68	E15.5-8
Fos	1.29577e-22	0.887614	0.856	0.508	3.6279e-18	E15.5-8
Fkbp10	1.24225e-253	0.887165	0.649	0.005	3.47805e-249	E15.5-8
Aldh1a2	1.73163e-211	0.886699	0.557	0.005	4.84821e-207	E15.5-8
Bicc1	2.50035e-158	0.885052	0.639	0.024	7.00047e-154	E15.5-8
Osr1	1.1352e-236	0.884915	0.588	0.003	3.17833e-232	E15.5-8
Nid1	2.26989e-235	0.875991	0.639	0.007	6.35523e-231	E15.5-8
Lmo4	1.46163e-47	0.873966	0.938	0.324	4.09228e-43	E15.5-8
Ttyh1	1.82892e-10	0.871665	0.299	0.109	5.12061e-06	E15.5-8
Txndc5	1.27237e-52	0.871638	0.876	0.27	3.56237e-48	E15.5-8
Dab2	4.39465e-198	0.871191	0.598	0.01	1.23041e-193	E15.5-8
Emp1	2.20576e-182	0.86811	0.505	0.006	6.17569e-178	E15.5-8
Mgst1	1.79757e-109	0.86799	0.577	0.035	5.03284e-105	E15.5-8
Serf2	4.51112e-48	0.863363	1	0.961	1.26302e-43	E15.5-8
Foxc1	9.30158e-233	0.857643	0.588	0.004	2.60426e-228	E15.5-8
P3h3	5.26239e-55	0.855446	0.691	0.139	1.47336e-50	E15.5-8
Zfp36l2	1.25899e-129	0.850701	0.732	0.05	3.52491e-125	E15.5-8
Cmbl	3.98791e-71	0.850518	0.526	0.054	1.11653e-66	E15.5-8
Cdh5	3.12005e-224	0.849621	0.577	0.004	8.73552e-220	E15.5-8
Nfib	2.81418e-52	0.838956	0.825	0.185	7.87915e-48	E15.5-8
Mt1	3.4882e-30	0.836732	0.402	0.075	9.76627e-26	E15.5-8
Sfrp2	1.41794e-28	0.836371	0.206	0.019	3.96995e-24	E15.5-8
Fkbp9	4.94641e-187	0.836195	0.722	0.025	1.3849e-182	E15.5-8
Enpp2	5.51854e-109	0.834504	0.526	0.027	1.54508e-104	E15.5-8
Slc7a11	1.02557e-157	0.830506	0.495	0.009	2.87139e-153	E15.5-8
Cebpb	7.13575e-108	0.828564	0.598	0.039	1.99787e-103	E15.5-8
Epha7	1.61042e-62	0.825982	0.68	0.117	4.50884e-58	E15.5-8
Tmem132c	1.69336e-102	0.824553	0.588	0.041	4.74107e-98	E15.5-8
Mt2	3.73898e-70	0.822161	0.474	0.041	1.04684e-65	E15.5-8
Aebp1	6.76462e-166	0.816451	0.454	0.005	1.89396e-161	E15.5-8
Prkcdbp	2.83747e-111	0.814887	0.722	0.065	7.94436e-107	E15.5-8
Nap1l1	3.2468e-37	0.813905	0.99	0.925	9.09039e-33	E15.5-8
Fmod	5.37399e-152	0.813566	0.381	0.002	1.50461e-147	E15.5-8
Wdr86	1.17869e-175	0.813499	0.536	0.009	3.3001e-171	E15.5-8
Selm	2.71413e-38	0.811599	0.68	0.187	7.59902e-34	E15.5-8
Jun	9.05965e-26	0.809958	0.979	0.658	2.53652e-21	E15.5-8
Pon2	1.2384e-134	0.804768	0.732	0.048	3.46727e-130	E15.5-8
Eef1d	2.12971e-39	0.804238	0.979	0.675	5.96276e-35	E15.5-8
Akap12	7.4151e-26	0.80355	0.68	0.281	2.07608e-21	E15.5-8
Cenpa	1.43493e-10	0.799432	0.165	0.035	4.01752e-06	E15.5-8
Stra6	5.24439e-136	0.793676	0.557	0.021	1.46833e-131	E15.5-8
Vcam1	1.6801e-230	0.791675	0.608	0.005	4.70395e-226	E15.5-8
Slc3a2	5.40773e-25	0.789832	0.804	0.399	1.51406e-20	E15.5-8
B2m	9.00418e-106	0.784328	0.814	0.093	2.52099e-101	E15.5-8
Tcf4	3.30628e-35	0.783404	0.959	0.471	9.25692e-31	E15.5-8
Emilin1	7.90586e-161	0.781386	0.577	0.016	2.21348e-156	E15.5-8
Cyr61	3.01267e-131	0.765867	0.526	0.019	8.43487e-127	E15.5-8
Lamp2	5.05034e-51	0.765535	0.784	0.199	1.414e-46	E15.5-8
Pdlim2	6.53739e-176	0.763357	0.577	0.013	1.83034e-171	E15.5-8
Ccnd2	3.47653e-64	0.761327	0.412	0.032	9.73358e-60	E15.5-8
Mfge8	1.00906e-96	0.755854	0.557	0.039	2.82518e-92	E15.5-8
Ptprz1	0.00925067	0.754195	0.32	0.248	1	E15.5-8
Cd302	1.55893e-142	0.752794	0.66	0.032	4.36469e-138	E15.5-8
Angptl2	1.23179e-175	0.752034	0.505	0.007	3.44878e-171	E15.5-8
Nr2f1	4.0498e-87	0.752012	0.67	0.069	1.13386e-82	E15.5-8
P4hb	1.69553e-34	0.751264	0.887	0.447	4.74715e-30	E15.5-8
Tpbg	1.76583e-53	0.751206	0.505	0.07	4.94398e-49	E15.5-8
Lrrc17	6.76615e-176	0.750493	0.505	0.007	1.89439e-171	E15.5-8
Fosb	1.62536e-42	0.750094	0.701	0.174	4.55069e-38	E15.5-8
Pdpn	7.80961e-189	0.748713	0.557	0.008	2.18654e-184	E15.5-8
Cp	2.34889e-219	0.747963	0.619	0.008	6.57643e-215	E15.5-8
Ech1	1.48363e-27	0.747213	0.825	0.415	4.15388e-23	E15.5-8
Itm2c	2.38547e-22	0.747032	0.918	0.781	6.67884e-18	E15.5-8
Edn3	7.91849e-218	0.746746	0.546	0.003	2.21702e-213	E15.5-8
Tpcn1	1.60403e-142	0.745834	0.66	0.033	4.49095e-138	E15.5-8
2810417H13Rik	1.18194e-46	0.740455	0.196	0.008	3.30919e-42	E15.5-8
Slc6a20a	3.02842e-203	0.739466	0.505	0.003	8.47898e-199	E15.5-8
Gng11	7.46677e-172	0.737932	0.598	0.015	2.09054e-167	E15.5-8
Ldha	1.35046e-16	0.735491	0.845	0.567	3.78101e-12	E15.5-8
Pantr1	4.17325e-07	0.735416	0.227	0.084	0.0116843	E15.5-8
H2afv	1.09978e-26	0.734361	0.99	0.906	3.07915e-22	E15.5-8
Hmgcs2	6.99521e-212	0.73303	0.515	0.002	1.95852e-207	E15.5-8
Tnfrsf19	6.20728e-120	0.732717	0.67	0.046	1.73791e-115	E15.5-8
Phgdh	9.22007e-21	0.727592	0.392	0.1	2.58144e-16	E15.5-8
Vkorc1	4.21727e-40	0.726571	0.773	0.26	1.18075e-35	E15.5-8
Oaf	3.04785e-217	0.726328	0.577	0.005	8.53337e-213	E15.5-8
Ifitm3	1.46712e-210	0.725459	0.557	0.005	4.10763e-206	E15.5-8
Col23a1	1.37913e-149	0.721299	0.557	0.017	3.86128e-145	E15.5-8
Prdx1	9.9062e-30	0.712996	0.948	0.88	2.77354e-25	E15.5-8
Birc5	1.43691e-37	0.712596	0.216	0.015	4.02305e-33	E15.5-8
Gsta4	3.07514e-182	0.710743	0.474	0.004	8.60979e-178	E15.5-8
Notch2	5.18497e-114	0.7086	0.505	0.022	1.45169e-109	E15.5-8
Nfia	1.33721e-54	0.708147	0.66	0.11	3.74393e-50	E15.5-8
Col13a1	2.30494e-172	0.708135	0.536	0.01	6.45336e-168	E15.5-8
Rplp0	8.32503e-44	0.707466	1	0.998	2.33084e-39	E15.5-8
Isyna1	5.27057e-14	0.707419	0.784	0.604	1.47566e-09	E15.5-8
Col5a1	9.12812e-227	0.706749	0.598	0.005	2.55569e-222	E15.5-8
Ccna2	2.58411e-39	0.705552	0.186	0.009	7.235e-35	E15.5-8
Cd248	7.34896e-191	0.698763	0.526	0.006	2.05756e-186	E15.5-8
Gjb2	3.62006e-183	0.697365	0.433	0.001	1.01354e-178	E15.5-8
Hic1	4.87988e-227	0.696345	0.567	0.003	1.36627e-222	E15.5-8
Col6a3	1.29032e-162	0.691774	0.588	0.017	3.61265e-158	E15.5-8
Tcf12	8.97556e-32	0.691032	0.907	0.439	2.51298e-27	E15.5-8
Glul	9.07853e-26	0.688615	0.753	0.362	2.54181e-21	E15.5-8
Fth1	1.63982e-33	0.688229	1	0.994	4.59116e-29	E15.5-8
Galk1	2.16739e-51	0.687788	0.701	0.162	6.06827e-47	E15.5-8
Abca1	1.27139e-148	0.687487	0.629	0.025	3.55965e-144	E15.5-8
Gadd45b	3.22294e-109	0.687346	0.536	0.028	9.0236e-105	E15.5-8
Top2a	4.55288e-63	0.686918	0.227	0.006	1.27471e-58	E15.5-8
Cstb	7.22114e-26	0.686363	0.897	0.514	2.02178e-21	E15.5-8
Tpm2	4.92447e-125	0.685095	0.567	0.027	1.37875e-120	E15.5-8
Rpl36a	2.08419e-39	0.680403	1	0.987	5.83532e-35	E15.5-8
Snhg18	4.03409e-84	0.675003	0.588	0.055	1.12946e-79	E15.5-8
Ptk7	3.58671e-55	0.673697	0.66	0.121	1.00421e-50	E15.5-8
Acaa2	4.28208e-69	0.672881	0.691	0.11	1.1989e-64	E15.5-8
Ssr2	7.37291e-26	0.672202	0.959	0.777	2.06427e-21	E15.5-8
Sept11	9.01495e-32	0.671311	0.876	0.461	2.524e-27	E15.5-8
Fmo1	1.23618e-155	0.670753	0.485	0.009	3.46107e-151	E15.5-8
Tmem64	5.04928e-71	0.667685	0.608	0.075	1.4137e-66	E15.5-8
Gng5	8.61772e-33	0.666068	1	0.856	2.41279e-28	E15.5-8
Fkbp7	4.70489e-89	0.663827	0.557	0.045	1.31728e-84	E15.5-8
Ctsk	2.09017e-161	0.663811	0.515	0.01	5.85206e-157	E15.5-8
Slc38a3	6.37429e-227	0.659518	0.567	0.003	1.78468e-222	E15.5-8
Myl9	1.79835e-86	0.657828	0.495	0.034	5.03503e-82	E15.5-8
Tcn2	2.30219e-83	0.656428	0.546	0.046	6.44567e-79	E15.5-8
Foxd1	2.40708e-141	0.655421	0.546	0.018	6.73935e-137	E15.5-8
Tpm1	1.27548e-14	0.65156	0.742	0.48	3.57108e-10	E15.5-8
Ranbp3l	3.50547e-216	0.651385	0.515	0.002	9.81462e-212	E15.5-8
Id1	4.39712e-98	0.651284	0.567	0.039	1.23111e-93	E15.5-8
Klf13	8.74105e-24	0.649858	0.742	0.339	2.44732e-19	E15.5-8
Rps12	4.57872e-37	0.64788	1	0.992	1.28195e-32	E15.5-8
Siva1	3.99884e-30	0.647398	0.742	0.289	1.1196e-25	E15.5-8
Rps20	1.9956e-40	0.646841	1	0.995	5.58728e-36	E15.5-8
Col4a5	2.35892e-196	0.644438	0.515	0.004	6.60452e-192	E15.5-8
Cdc20	1.38445e-36	0.644274	0.196	0.012	3.87618e-32	E15.5-8
Tgm2	5.33292e-216	0.643928	0.526	0.002	1.49311e-211	E15.5-8
Calu	7.01836e-38	0.643761	0.866	0.339	1.965e-33	E15.5-8
Ctsz	3.50103e-32	0.641908	0.732	0.265	9.80218e-28	E15.5-8
Crabp2	1.796e-08	0.641301	0.351	0.157	0.000502844	E15.5-8
Kdelr2	1.70123e-24	0.640483	0.845	0.472	4.76311e-20	E15.5-8
Tjp1	2.8283e-71	0.63527	0.588	0.067	7.91866e-67	E15.5-8
Ostf1	2.25983e-68	0.633216	0.598	0.076	6.32706e-64	E15.5-8
Tob1	7.0601e-37	0.632718	0.794	0.245	1.97669e-32	E15.5-8
Sox9	4.61373e-60	0.631588	0.443	0.042	1.29175e-55	E15.5-8
Ptch1	2.69161e-45	0.627904	0.629	0.129	7.53598e-41	E15.5-8
Sidt1	1.94965e-188	0.62151	0.526	0.006	5.45863e-184	E15.5-8
Sri	1.93899e-25	0.621254	0.784	0.409	5.4288e-21	E15.5-8
Ccnb1	2.65812e-49	0.620848	0.186	0.006	7.4422e-45	E15.5-8
Rps4x	1.30778e-43	0.618965	1	0.998	3.66153e-39	E15.5-8
Kdelr1	1.91515e-21	0.617701	0.876	0.683	5.36204e-17	E15.5-8
Klf4	6.64642e-84	0.617182	0.557	0.046	1.86086e-79	E15.5-8
a	2.09083e-188	0.615433	0.464	0.002	5.85392e-184	E15.5-8
C1qtnf2	1.28917e-99	0.614843	0.515	0.031	3.60941e-95	E15.5-8
Gsn	3.59512e-40	0.612919	0.526	0.104	1.00656e-35	E15.5-8
Rab34	1.05653e-26	0.612599	0.784	0.353	2.95807e-22	E15.5-8
Sp5	1.60755e-179	0.612072	0.515	0.007	4.50083e-175	E15.5-8
Etfb	8.42927e-25	0.611713	0.907	0.551	2.36003e-20	E15.5-8
Rarres2	4.52023e-170	0.609726	0.423	0.002	1.26557e-165	E15.5-8
Hmgn3	2.4941e-23	0.608819	0.979	0.7	6.98297e-19	E15.5-8
Junb	4.62907e-14	0.608326	0.629	0.312	1.29605e-09	E15.5-8
Cks1b	1.39478e-17	0.603867	0.722	0.376	3.90511e-13	E15.5-8
Smc4	4.45946e-16	0.602011	0.371	0.111	1.24856e-11	E15.5-8
Pard6g	2.36637e-30	0.601823	0.876	0.395	6.62537e-26	E15.5-8
Flna	1.71347e-41	0.601735	0.639	0.152	4.79738e-37	E15.5-8
Foxc2	6.24975e-188	0.601464	0.454	0.002	1.74981e-183	E15.5-8
Ptbp1	8.27559e-37	0.60005	0.742	0.229	2.317e-32	E15.5-8
Axin2	2.08467e-69	0.59923	0.546	0.059	5.83667e-65	E15.5-8
Rpl28	1.33079e-35	0.595506	1	0.996	3.72593e-31	E15.5-8
Gas1	3.39406e-104	0.594755	0.423	0.015	9.5027e-100	E15.5-8
Pdia6	3.99329e-22	0.594712	0.918	0.653	1.11804e-17	E15.5-8
Slc22a23	1.26726e-58	0.593981	0.588	0.087	3.54806e-54	E15.5-8
Tgfb1i1	1.17833e-45	0.593148	0.588	0.112	3.29909e-41	E15.5-8
Ogn	3.45603e-128	0.592338	0.309	0.001	9.67618e-124	E15.5-8
Gm10073	1.03221e-23	0.592195	0.907	0.59	2.88997e-19	E15.5-8
Ctdsp2	3.25825e-47	0.590391	0.691	0.154	9.12244e-43	E15.5-8
Metrn	6.29526e-64	0.589655	0.474	0.045	1.76255e-59	E15.5-8
Eci2	5.16947e-25	0.587809	0.928	0.562	1.44735e-20	E15.5-8
Prss23	5.21278e-117	0.587787	0.412	0.011	1.45948e-112	E15.5-8
Lox	1.59136e-144	0.587298	0.381	0.003	4.45548e-140	E15.5-8
Rsu1	3.8067e-43	0.585954	0.753	0.197	1.0658e-38	E15.5-8
Raly	1.28314e-23	0.582094	0.969	0.889	3.59254e-19	E15.5-8
Rpl13a	1.45692e-37	0.580738	1	1	4.07909e-33	E15.5-8
Pfn1	1.41911e-31	0.57975	1	0.983	3.97321e-27	E15.5-8
Cyba	7.86286e-118	0.578855	0.577	0.03	2.20144e-113	E15.5-8
Ahnak	1.31471e-207	0.578306	0.557	0.005	3.68093e-203	E15.5-8
Cat	1.82121e-33	0.575256	0.732	0.238	5.09901e-29	E15.5-8
Egr1	3.47433e-19	0.574909	0.598	0.229	9.72743e-15	E15.5-8
Arhgef25	2.18208e-51	0.573247	0.619	0.111	6.10939e-47	E15.5-8
Acadl	3.56906e-134	0.572546	0.619	0.03	9.99266e-130	E15.5-8
Ak3	1.55685e-37	0.572129	0.753	0.228	4.35886e-33	E15.5-8
Npc2	7.59643e-24	0.572024	0.979	0.728	2.12685e-19	E15.5-8
Cd164	2.92713e-45	0.571896	0.67	0.142	8.19538e-41	E15.5-8
Serp1	7.9859e-26	0.570151	0.845	0.432	2.23589e-21	E15.5-8
Mmp14	1.85512e-140	0.569279	0.567	0.02	5.19397e-136	E15.5-8
S100a10	7.76911e-11	0.567818	0.742	0.491	2.17519e-06	E15.5-8
Pdgfrl	1.97051e-179	0.565967	0.443	0.002	5.51705e-175	E15.5-8
Snai1	3.99066e-135	0.563828	0.454	0.01	1.11731e-130	E15.5-8
Hspa1a	7.38619e-23	0.562606	0.371	0.083	2.06798e-18	E15.5-8
Slc19a1	8.8616e-50	0.562555	0.588	0.103	2.48107e-45	E15.5-8
Plin3	4.94012e-129	0.562194	0.577	0.026	1.38314e-124	E15.5-8
Ndrg2	4.96492e-05	0.561716	0.495	0.321	1	E15.5-8
Tmed10	2.18399e-19	0.561447	0.928	0.688	6.11473e-15	E15.5-8
Ghr	7.47328e-93	0.559627	0.536	0.037	2.09237e-88	E15.5-8
Yap1	5.46798e-236	0.559455	0.588	0.003	1.53092e-231	E15.5-8
Aldh7a1	1.18822e-48	0.558698	0.598	0.109	3.32677e-44	E15.5-8
S100a13	1.07803e-161	0.557403	0.546	0.013	3.01828e-157	E15.5-8
Lamc3	2.47641e-168	0.556972	0.443	0.004	6.93344e-164	E15.5-8
Slc39a1	1.11085e-29	0.555239	0.515	0.122	3.11016e-25	E15.5-8
Anxa3	1.45743e-59	0.554921	0.309	0.017	4.0805e-55	E15.5-8
H1f0	2.05137e-11	0.55451	0.907	0.679	5.74344e-07	E15.5-8
Rpl39	1.16578e-32	0.553832	1	0.999	3.26394e-28	E15.5-8
Zic5	8.1173e-95	0.553618	0.526	0.033	2.27268e-90	E15.5-8
Bsg	7.29247e-26	0.553047	0.979	0.966	2.04174e-21	E15.5-8
Rpl22	1.06853e-25	0.552071	0.99	0.958	2.99167e-21	E15.5-8
Cdc42ep5	1.66148e-105	0.551167	0.536	0.03	4.65182e-101	E15.5-8
Rhoa	3.40652e-22	0.551107	0.938	0.757	9.53758e-18	E15.5-8
Sulf2	4.173e-28	0.550624	0.608	0.181	1.16836e-23	E15.5-8
Sdc2	1.16298e-51	0.550269	0.577	0.092	3.25611e-47	E15.5-8
Cyp1b1	7.41788e-212	0.550149	0.515	0.002	2.07686e-207	E15.5-8
Fxyd1	1.65712e-121	0.549583	0.526	0.022	4.63961e-117	E15.5-8
Cdk1	3.68076e-131	0.546523	0.381	0.005	1.03054e-126	E15.5-8
Ccnd1	2.03001e-53	0.546275	0.32	0.023	5.68361e-49	E15.5-8
Lamc1	2.23416e-83	0.545121	0.557	0.048	6.2552e-79	E15.5-8
Il11ra1	7.37098e-40	0.544938	0.474	0.081	2.06373e-35	E15.5-8
Tnfrsf1a	6.76007e-158	0.54149	0.567	0.015	1.89269e-153	E15.5-8
Ednrb	1.12723e-55	0.54144	0.186	0.004	3.15602e-51	E15.5-8
Itgb5	1.50496e-124	0.539391	0.474	0.014	4.21358e-120	E15.5-8
Pofut2	1.97099e-23	0.538962	0.732	0.354	5.51837e-19	E15.5-8
Maged2	6.18506e-13	0.538452	0.928	0.816	1.73169e-08	E15.5-8
Rhoj	9.8179e-133	0.538372	0.392	0.006	2.74882e-128	E15.5-8
Arpc1b	1.82845e-82	0.535955	0.619	0.062	5.1193e-78	E15.5-8
Rbms2	4.76002e-84	0.53593	0.608	0.058	1.33271e-79	E15.5-8
Maf	1.71421e-60	0.535799	0.454	0.043	4.79944e-56	E15.5-8
Gprc5b	6.72845e-147	0.534881	0.526	0.014	1.88383e-142	E15.5-8
Rab13	4.8129e-68	0.534129	0.505	0.05	1.34752e-63	E15.5-8
Sept2	1.03751e-26	0.533953	0.876	0.445	2.90481e-22	E15.5-8
Pxdc1	5.00195e-111	0.532418	0.32	0.004	1.40045e-106	E15.5-8
Tsc22d4	4.22792e-22	0.531212	0.639	0.218	1.18373e-17	E15.5-8
Lama2	1.26878e-190	0.530746	0.495	0.004	3.55232e-186	E15.5-8
Gng12	6.22617e-100	0.530262	0.485	0.025	1.7432e-95	E15.5-8
Postn	3.21414e-114	0.529205	0.32	0.004	8.99895e-110	E15.5-8
Tle1	2.54586e-31	0.528383	0.608	0.161	7.12789e-27	E15.5-8
Cdca3	9.90224e-21	0.527675	0.196	0.025	2.77243e-16	E15.5-8
Mdfi	9.87135e-140	0.526925	0.526	0.016	2.76378e-135	E15.5-8
Snx3	7.32477e-19	0.525219	0.907	0.694	2.05079e-14	E15.5-8
Rps27	1.02702e-24	0.522958	1	0.998	2.87544e-20	E15.5-8
Lrp1	3.17491e-16	0.522775	0.722	0.416	8.88912e-12	E15.5-8
Cd9	2.83864e-49	0.521929	0.454	0.056	7.94763e-45	E15.5-8
9430020K01Rik	1.51486e-168	0.521628	0.495	0.007	4.24132e-164	E15.5-8
Spc25	2.0434e-71	0.521077	0.237	0.005	5.7211e-67	E15.5-8
Zeb2	3.47599e-116	0.520774	0.577	0.03	9.73207e-112	E15.5-8
Ctsl	1.97989e-13	0.520228	0.866	0.693	5.5433e-09	E15.5-8
Idh2	1.8841e-20	0.519897	0.928	0.643	5.2751e-16	E15.5-8
Hsp90b1	5.26309e-15	0.516696	0.907	0.731	1.47356e-10	E15.5-8
Rps29	3.69608e-37	0.516475	1	0.998	1.03483e-32	E15.5-8
Ier2	4.51392e-21	0.514406	0.742	0.304	1.26381e-16	E15.5-8
Socs3	9.17971e-40	0.512767	0.443	0.068	2.57014e-35	E15.5-8
Glmp	3.91176e-34	0.511137	0.68	0.205	1.09521e-29	E15.5-8
1810037I17Rik	1.09324e-13	0.510379	0.856	0.623	3.06087e-09	E15.5-8
Gramd3	2.89782e-157	0.51037	0.495	0.009	8.1133e-153	E15.5-8
Wnt6	8.25725e-67	0.510219	0.278	0.011	2.31187e-62	E15.5-8
Atp6v0e	1.45948e-21	0.50937	0.845	0.471	4.08625e-17	E15.5-8
Dkk3	1.43042e-139	0.50917	0.495	0.013	4.0049e-135	E15.5-8
Psat1	1.7272e-10	0.509043	0.423	0.197	4.83582e-06	E15.5-8
Ddost	3.88856e-19	0.507886	0.948	0.68	1.08872e-14	E15.5-8
Glo1	1.13729e-23	0.507844	0.897	0.518	3.18419e-19	E15.5-8
Man2a1	9.43951e-67	0.5068	0.495	0.049	2.64287e-62	E15.5-8
Gatm	6.71666e-16	0.506004	0.351	0.103	1.88053e-11	E15.5-8
Ccnb2	1.07119e-24	0.505513	0.196	0.02	2.99912e-20	E15.5-8
Hspa5	1.7057e-18	0.504603	0.928	0.747	4.77561e-14	E15.5-8
Fam64a	1.01029e-14	0.502896	0.186	0.032	2.8286e-10	E15.5-8
Tmem167	5.53983e-19	0.501075	0.928	0.726	1.55104e-14	E15.5-8
A2m	2.56228e-167	0.500445	0.433	0.003	7.17388e-163	E15.5-8
Scarf2	1.59159e-139	0.49984	0.464	0.01	4.45613e-135	E15.5-8
Col9a2	2.02436e-32	0.499629	0.505	0.11	5.6678e-28	E15.5-8
Uaca	1.24207e-177	0.497829	0.557	0.01	3.47754e-173	E15.5-8
Cped1	3.96439e-176	0.497459	0.454	0.003	1.10995e-171	E15.5-8
Tcf3	2.06649e-19	0.49611	0.825	0.464	5.78575e-15	E15.5-8
Rps18	9.46992e-33	0.495907	1	1	2.65139e-28	E15.5-8
Pid1	1.42152e-22	0.495053	0.763	0.325	3.97998e-18	E15.5-8
Marc2	1.77885e-21	0.493674	0.68	0.29	4.98041e-17	E15.5-8
Ctdsp1	4.9762e-104	0.490878	0.546	0.032	1.39324e-99	E15.5-8
Txnip	5.04308e-42	0.490747	0.464	0.071	1.41196e-37	E15.5-8
Cpq	3.32986e-42	0.489426	0.557	0.104	9.32294e-38	E15.5-8
Fgfr1	1.54182e-25	0.48919	0.67	0.23	4.31678e-21	E15.5-8
Ctnnb1	1.01803e-18	0.487614	0.969	0.737	2.85027e-14	E15.5-8
Ostc	9.46019e-16	0.487462	0.948	0.782	2.64866e-11	E15.5-8
Rps3a1	5.33125e-31	0.487264	1	0.996	1.49264e-26	E15.5-8
Hmg20b	9.27925e-44	0.487212	0.691	0.155	2.598e-39	E15.5-8
Tubb6	4.8141e-108	0.48655	0.32	0.005	1.34785e-103	E15.5-8
Ssr3	3.9798e-18	0.485604	0.948	0.718	1.11427e-13	E15.5-8
Serping1	1.81953e-30	0.484988	0.474	0.106	5.09433e-26	E15.5-8
Bmp5	4.96519e-183	0.484392	0.423	0.001	1.39015e-178	E15.5-8
Blvrb	6.62497e-86	0.483935	0.526	0.039	1.85486e-81	E15.5-8
Shc1	6.5947e-101	0.483215	0.557	0.035	1.84638e-96	E15.5-8
Grn	7.63952e-46	0.483127	0.649	0.138	2.13891e-41	E15.5-8
Zfyve21	2.66076e-72	0.48255	0.577	0.063	7.44961e-68	E15.5-8
Zcchc24	4.6721e-178	0.481569	0.474	0.004	1.30809e-173	E15.5-8
Rps27a	9.8824e-33	0.481316	1	0.999	2.76687e-28	E15.5-8
Creb3l1	1.93456e-83	0.481268	0.454	0.028	5.41638e-79	E15.5-8
Rps8	2.58476e-33	0.481029	1	0.999	7.23681e-29	E15.5-8
Gm8730	3.11733e-17	0.48027	0.938	0.733	8.72789e-13	E15.5-8
Lama1	5.85184e-57	0.480125	0.381	0.033	1.6384e-52	E15.5-8
Suclg2	5.30233e-81	0.47941	0.567	0.051	1.48455e-76	E15.5-8
Anxa7	9.80582e-50	0.477346	0.485	0.066	2.74543e-45	E15.5-8
Rpn2	1.07925e-14	0.475538	0.887	0.642	3.02168e-10	E15.5-8
Fzd2	1.63279e-101	0.475508	0.485	0.024	4.5715e-97	E15.5-8
Zic4	6.43723e-59	0.473929	0.588	0.075	1.8023e-54	E15.5-8
Krtcap2	2.19184e-22	0.473847	0.979	0.859	6.13673e-18	E15.5-8
Rbms1	4.80595e-17	0.472986	0.701	0.357	1.34557e-12	E15.5-8
Rpl23	2.24491e-30	0.472736	1	0.998	6.28531e-26	E15.5-8
Plxdc2	9.87682e-39	0.4717	0.485	0.083	2.76531e-34	E15.5-8
Ppp1r15a	9.78882e-23	0.470925	0.557	0.17	2.74067e-18	E15.5-8
Aldoc	4.87126e-07	0.470188	0.134	0.035	0.0136385	E15.5-8
Rpl13	2.56802e-36	0.470051	1	0.999	7.18993e-32	E15.5-8
Tmem165	4.05684e-20	0.468685	0.794	0.404	1.13584e-15	E15.5-8
Rps15a	5.93472e-32	0.468305	1	0.997	1.6616e-27	E15.5-8
Hdlbp	6.12566e-21	0.466279	0.639	0.267	1.71506e-16	E15.5-8
Crtap	2.66001e-112	0.464796	0.485	0.02	7.4475e-108	E15.5-8
Hnrnpf	6.11439e-12	0.464118	0.969	0.835	1.71191e-07	E15.5-8
Tipin	2.37678e-10	0.463817	0.536	0.275	6.65452e-06	E15.5-8
Dap	5.74503e-19	0.463261	0.629	0.253	1.60849e-14	E15.5-8
Plp2	4.56188e-32	0.462825	0.485	0.099	1.27723e-27	E15.5-8
Serpine2	0.00528388	0.462563	0.577	0.438	1	E15.5-8
Ginm1	1.18815e-29	0.462479	0.68	0.212	3.32657e-25	E15.5-8
Gm14964	1.19474e-44	0.461412	0.433	0.056	3.34502e-40	E15.5-8
Wwtr1	8.91584e-185	0.460664	0.464	0.003	2.49626e-180	E15.5-8
Klf2	7.0873e-41	0.460275	0.309	0.03	1.9843e-36	E15.5-8
Cenpf	7.96467e-20	0.45902	0.186	0.023	2.22995e-15	E15.5-8
Bcl7c	3.96171e-12	0.458614	0.711	0.468	1.1092e-07	E15.5-8
Eln	9.92314e-93	0.458542	0.402	0.017	2.77828e-88	E15.5-8
Lamp1	1.8671e-14	0.458218	0.948	0.857	5.22751e-10	E15.5-8
Axl	4.44119e-119	0.457932	0.505	0.02	1.24345e-114	E15.5-8
Tff3	4.89561e-06	0.455023	0.103	0.025	0.137067	E15.5-8
Pdgfrb	2.86385e-174	0.453744	0.433	0.002	8.01821e-170	E15.5-8
Arhgap20	4.27248e-36	0.452974	0.474	0.087	1.19621e-31	E15.5-8
Rps9	6.65086e-32	0.452762	1	0.999	1.86211e-27	E15.5-8
Stx4a	1.60577e-57	0.452646	0.649	0.102	4.49585e-53	E15.5-8
Tmbim6	2.02382e-15	0.452224	0.918	0.704	5.66629e-11	E15.5-8
Smo	1.46642e-72	0.450098	0.598	0.064	4.10568e-68	E15.5-8
2610001J05Rik	8.8591e-21	0.44897	0.794	0.402	2.48037e-16	E15.5-8
Surf4	6.47644e-19	0.447488	0.773	0.395	1.81327e-14	E15.5-8
Htra1	5.97747e-110	0.447209	0.268	0.001	1.67357e-105	E15.5-8
Gm3764	5.14732e-06	0.446605	0.206	0.082	0.144115	E15.5-8
Mxd4	1.70817e-15	0.445993	0.701	0.359	4.78253e-11	E15.5-8
Sep15	1.19295e-19	0.445594	0.99	0.944	3.34002e-15	E15.5-8
Amotl1	2.93066e-30	0.444722	0.567	0.144	8.20525e-26	E15.5-8
Pttg1ip	1.3526e-25	0.443623	0.66	0.237	3.78701e-21	E15.5-8
Ifi27	3.55364e-48	0.442829	0.402	0.044	9.94949e-44	E15.5-8
Lockd	3.85143e-59	0.441722	0.216	0.006	1.07832e-54	E15.5-8
Fam174b	1.19935e-20	0.440507	0.567	0.202	3.35795e-16	E15.5-8
Rcsd1	1.48574e-138	0.440315	0.443	0.009	4.15978e-134	E15.5-8
Trf	5.86213e-21	0.439876	0.351	0.077	1.64128e-16	E15.5-8
Tmem119	7.47228e-85	0.439436	0.34	0.012	2.09209e-80	E15.5-8
Crip1	7.66026e-44	0.439187	0.423	0.056	2.14472e-39	E15.5-8
Rpl18a	7.27814e-29	0.439018	1	0.999	2.03773e-24	E15.5-8
Atp1b2	1.03368e-22	0.438987	0.495	0.148	2.8941e-18	E15.5-8
Impdh2	5.18377e-14	0.437914	0.887	0.67	1.45135e-09	E15.5-8
Pth1r	2.15292e-75	0.437629	0.423	0.027	6.02776e-71	E15.5-8
Cmtm7	1.33418e-112	0.43729	0.464	0.017	3.73544e-108	E15.5-8
Tpt1	2.78724e-29	0.436305	1	0.997	7.80373e-25	E15.5-8
Fhl2	1.18481e-13	0.436202	0.361	0.118	3.31723e-09	E15.5-8
Yif1a	2.65476e-24	0.436187	0.639	0.233	7.4328e-20	E15.5-8
Rrm2	3.96282e-07	0.435016	0.175	0.056	0.0110951	E15.5-8
Bad	7.8483e-13	0.43497	0.856	0.566	2.19737e-08	E15.5-8
Tmed3	2.09016e-16	0.434922	0.68	0.351	5.85203e-12	E15.5-8
Rpl12	3.15149e-20	0.43446	1	0.988	8.82355e-16	E15.5-8
Wisp1	6.46985e-142	0.433366	0.392	0.004	1.81143e-137	E15.5-8
Ctnna1	5.67118e-27	0.433299	0.629	0.198	1.58782e-22	E15.5-8
Tmem45a	3.87049e-165	0.430392	0.402	0.002	1.08366e-160	E15.5-8
Ptpn14	1.46012e-153	0.429595	0.402	0.003	4.08803e-149	E15.5-8
Nusap1	1.67526e-28	0.427742	0.134	0.007	4.69039e-24	E15.5-8
Tmem39a	2.45697e-40	0.427541	0.495	0.085	6.87904e-36	E15.5-8
Rps16	1.55493e-27	0.427241	1	0.999	4.35348e-23	E15.5-8
Ssr4	5.25871e-15	0.426415	0.928	0.754	1.47233e-10	E15.5-8
Slc50a1	2.79184e-30	0.426401	0.536	0.134	7.81658e-26	E15.5-8
Rpl22l1	7.53947e-19	0.426194	1	0.982	2.1109e-14	E15.5-8
Col4a6	2.00253e-155	0.424262	0.371	0.001	5.60668e-151	E15.5-8
Col11a1	7.23418e-57	0.423926	0.515	0.063	2.02543e-52	E15.5-8
Calr	2.5958e-10	0.422971	0.938	0.864	7.26773e-06	E15.5-8
Lman1	9.54847e-22	0.4227	0.67	0.263	2.67338e-17	E15.5-8
Wipi1	1.84458e-111	0.422427	0.567	0.031	5.16445e-107	E15.5-8
Dpm3	1.17336e-16	0.421367	0.866	0.531	3.28516e-12	E15.5-8
Dact1	3.88683e-15	0.420458	0.505	0.2	1.08824e-10	E15.5-8
Snx6	2.04189e-11	0.420303	0.845	0.622	5.71689e-07	E15.5-8
Kank2	6.49924e-140	0.419693	0.371	0.003	1.81966e-135	E15.5-8
Kdelr3	5.69821e-147	0.419179	0.371	0.002	1.59539e-142	E15.5-8
Sfrp1	3.60953e-22	0.418795	0.381	0.09	1.0106e-17	E15.5-8
Chchd7	6.86555e-17	0.418427	0.732	0.375	1.92222e-12	E15.5-8
Epb41l2	9.548e-51	0.417696	0.495	0.066	2.67325e-46	E15.5-8
Elovl1	1.53986e-33	0.417669	0.485	0.098	4.31131e-29	E15.5-8
Mid1ip1	2.52736e-11	0.417181	0.773	0.49	7.0761e-07	E15.5-8
Il13ra1	1.47675e-72	0.416737	0.423	0.029	4.13461e-68	E15.5-8
Rpl10a	1.95513e-23	0.41668	1	0.995	5.47397e-19	E15.5-8
Ror2	9.98294e-127	0.416371	0.433	0.01	2.79502e-122	E15.5-8
Hsd17b10	6.71753e-16	0.415763	0.918	0.606	1.88077e-11	E15.5-8
Hexim1	3.27666e-24	0.415529	0.577	0.178	9.17399e-20	E15.5-8
Tmem37	9.44538e-130	0.41535	0.392	0.006	2.64452e-125	E15.5-8
Rest	4.56315e-121	0.41523	0.474	0.016	1.27759e-116	E15.5-8
Spc24	1.75232e-34	0.413816	0.237	0.02	4.90614e-30	E15.5-8
Nes	1.84599e-41	0.413171	0.392	0.049	5.16842e-37	E15.5-8
Tpd52l1	2.11946e-15	0.413011	0.485	0.183	5.93406e-11	E15.5-8
Slc29a1	9.18613e-72	0.412698	0.381	0.022	2.57193e-67	E15.5-8
Fam114a1	5.18932e-97	0.412408	0.423	0.018	1.45291e-92	E15.5-8
Ctsb	1.43345e-23	0.412321	0.918	0.609	4.01338e-19	E15.5-8
Tceal8	2.25843e-15	0.412184	0.959	0.828	6.32316e-11	E15.5-8
Paics	2.05632e-12	0.411581	0.835	0.594	5.75729e-08	E15.5-8
Trip6	2.32264e-89	0.409712	0.474	0.028	6.50292e-85	E15.5-8
Cdca8	4.79253e-11	0.409204	0.216	0.057	1.34181e-06	E15.5-8
Mpzl1	6.06528e-14	0.408582	0.856	0.639	1.69816e-09	E15.5-8
Lpp	2.61392e-48	0.408138	0.474	0.064	7.31845e-44	E15.5-8
Peli2	6.01749e-90	0.4079	0.485	0.029	1.68478e-85	E15.5-8
Itgb1	2.28856e-18	0.407182	0.866	0.481	6.4075e-14	E15.5-8
Enpp1	3.9182e-80	0.406794	0.351	0.015	1.09702e-75	E15.5-8
Ninj1	1.51707e-50	0.405658	0.495	0.065	4.2475e-46	E15.5-8
Tmem256	1.55601e-14	0.405397	0.959	0.768	4.35652e-10	E15.5-8
Rpa3	6.14625e-16	0.405296	0.598	0.269	1.72083e-11	E15.5-8
Tmem47	1.40662e-06	0.405295	0.412	0.222	0.0393825	E15.5-8
S1pr3	2.12254e-134	0.404636	0.402	0.006	5.9427e-130	E15.5-8
Nucb1	7.02844e-20	0.403587	0.639	0.251	1.96782e-15	E15.5-8
Hlf	1.09529e-52	0.403466	0.423	0.044	3.06661e-48	E15.5-8
Rpl3	1.94575e-26	0.403014	1	0.998	5.44771e-22	E15.5-8
Tmed9	6.31554e-11	0.40221	0.866	0.63	1.76822e-06	E15.5-8
Aamdc	4.78926e-19	0.402175	0.639	0.256	1.3409e-14	E15.5-8
Pbk	1.52342e-63	0.401819	0.186	0.003	4.26528e-59	E15.5-8
Fgfbp1	8.19784e-67	0.401447	0.186	0.002	2.29523e-62	E15.5-8
Rbm3	6.87121e-12	0.401232	1	0.962	1.9238e-07	E15.5-8
Jag1	5.37225e-33	0.399304	0.32	0.041	1.50412e-28	E15.5-8
Cxcl16	8.53221e-71	0.398752	0.216	0.004	2.38885e-66	E15.5-8
Rpl7	1.09352e-27	0.398428	1	0.999	3.06164e-23	E15.5-8
Srpx2	2.8535e-146	0.398265	0.34	0.001	7.98922e-142	E15.5-8
Fgfr2	3.06493e-52	0.397947	0.464	0.055	8.58118e-48	E15.5-8
Tgfbr2	8.67241e-119	0.397599	0.402	0.009	2.4281e-114	E15.5-8
Fat1	4.49369e-56	0.396495	0.485	0.055	1.25814e-51	E15.5-8
Etfa	8.54306e-21	0.39612	0.711	0.299	2.39189e-16	E15.5-8
Prdx6	1.95361e-09	0.396055	0.804	0.604	5.46971e-05	E15.5-8
Cdh11	4.87911e-31	0.395471	0.464	0.095	1.36605e-26	E15.5-8
Cpxm1	4.60707e-45	0.395403	0.412	0.05	1.28989e-40	E15.5-8
Rps11	1.25252e-23	0.395017	1	0.997	3.50682e-19	E15.5-8
Cox6b2	9.4434e-34	0.39491	0.361	0.053	2.64396e-29	E15.5-8
Ilk	1.53517e-14	0.394756	0.804	0.503	4.29816e-10	E15.5-8
Hes5	2.35169e-16	0.393056	0.175	0.026	6.58426e-12	E15.5-8
Tram1	3.1688e-24	0.393047	0.701	0.253	8.872e-20	E15.5-8
B3gnt9	2.05374e-60	0.392941	0.412	0.036	5.75007e-56	E15.5-8
Ddit4	7.53898e-21	0.392805	0.505	0.153	2.11076e-16	E15.5-8
Pdzd11	1.55034e-12	0.392078	0.753	0.466	4.34065e-08	E15.5-8
Rpl23a	1.26305e-22	0.392	1	0.995	3.53628e-18	E15.5-8
Cdk6	9.73444e-77	0.391958	0.33	0.013	2.72545e-72	E15.5-8
Tom1l1	7.51466e-50	0.391957	0.443	0.052	2.10395e-45	E15.5-8
Ugp2	5.24343e-19	0.391857	0.67	0.289	1.46806e-14	E15.5-8
Tpi1	4.91649e-10	0.391811	0.979	0.81	1.37652e-05	E15.5-8
Vamp3	4.3558e-13	0.391684	0.68	0.361	1.21954e-08	E15.5-8
Adamts1	1.99956e-117	0.391656	0.381	0.008	5.59836e-113	E15.5-8
Pttg1	1.06814e-37	0.391208	0.515	0.097	2.99058e-33	E15.5-8
Hat1	3.22833e-17	0.391054	0.495	0.173	9.03868e-13	E15.5-8
Eif4ebp1	4.76734e-75	0.390727	0.485	0.039	1.33476e-70	E15.5-8
Elavl1	2.02867e-11	0.390138	0.773	0.544	5.67988e-07	E15.5-8
Snx5	1.68218e-19	0.387768	0.763	0.365	4.70977e-15	E15.5-8
Twist1	1.19128e-170	0.387478	0.433	0.003	3.33533e-166	E15.5-8
Ccdc34	4.23387e-07	0.387451	0.753	0.597	0.011854	E15.5-8
Clic4	2.30932e-22	0.387443	0.567	0.181	6.46563e-18	E15.5-8
Rps23	9.03656e-28	0.387165	1	0.999	2.53006e-23	E15.5-8
Cnpy2	5.27317e-13	0.386783	0.959	0.807	1.47638e-08	E15.5-8
Rps2	3.07744e-22	0.386736	1	0.999	8.61621e-18	E15.5-8
Rpl17	8.25679e-23	0.386361	1	0.999	2.31174e-18	E15.5-8
P3h4	1.09737e-19	0.386355	0.598	0.232	3.07242e-15	E15.5-8
Rab3il1	6.77758e-31	0.385793	0.526	0.118	1.89759e-26	E15.5-8
Nedd4	1.42048e-16	0.385758	1	0.923	3.97707e-12	E15.5-8
Rps15	8.6229e-27	0.38575	1	1	2.41424e-22	E15.5-8
Zfp385a	2.08567e-18	0.385593	0.526	0.188	5.83946e-14	E15.5-8
Prc1	1.32764e-34	0.385392	0.175	0.01	3.71712e-30	E15.5-8
Fam43a	4.53934e-65	0.383337	0.454	0.038	1.27092e-60	E15.5-8
Lamb2	9.87889e-134	0.382825	0.433	0.009	2.76589e-129	E15.5-8
Nrarp	4.24207e-30	0.382634	0.227	0.022	1.18769e-25	E15.5-8
Prrx1	1.939e-147	0.382625	0.381	0.003	5.42881e-143	E15.5-8
Tnc	5.70368e-127	0.382533	0.351	0.004	1.59692e-122	E15.5-8
Rell1	1.403e-50	0.381391	0.412	0.044	3.92811e-46	E15.5-8
Fn1	9.01935e-68	0.380602	0.351	0.02	2.52524e-63	E15.5-8
Acaa1a	4.8655e-15	0.380343	0.845	0.535	1.36224e-10	E15.5-8
Rap1a	6.51667e-14	0.380252	0.825	0.573	1.82454e-09	E15.5-8
Parva	5.44876e-37	0.37987	0.526	0.101	1.52554e-32	E15.5-8
Msx1	9.06748e-42	0.379761	0.216	0.012	2.53871e-37	E15.5-8
Obsl1	1.44544e-33	0.377823	0.464	0.086	4.04695e-29	E15.5-8
Spry1	1.66762e-13	0.37708	0.33	0.096	4.66899e-09	E15.5-8
Pdzrn3	1.25494e-49	0.376775	0.495	0.064	3.51357e-45	E15.5-8
Lhfpl2	9.42266e-52	0.376341	0.443	0.05	2.63816e-47	E15.5-8
Tmed1	2.81276e-16	0.376049	0.691	0.336	7.87516e-12	E15.5-8
Oat	8.08603e-21	0.375922	0.639	0.231	2.26393e-16	E15.5-8
Rasl11b	1.00966e-53	0.375834	0.371	0.031	2.82684e-49	E15.5-8
Ppp2r5a	2.0583e-58	0.375755	0.443	0.044	5.76282e-54	E15.5-8
Chd7	7.73125e-14	0.375698	0.711	0.351	2.1646e-09	E15.5-8
Col16a1	6.56792e-119	0.373081	0.412	0.01	1.83889e-114	E15.5-8
Nudcd2	1.9589e-12	0.372317	0.732	0.434	5.48454e-08	E15.5-8
Mmp11	6.11737e-21	0.371848	0.423	0.109	1.71274e-16	E15.5-8
E2f5	5.39225e-23	0.370839	0.464	0.12	1.50972e-18	E15.5-8
Rpl41	2.12084e-28	0.370336	1	1	5.93792e-24	E15.5-8
Sptbn1	2.54979e-07	0.369221	0.835	0.756	0.00713889	E15.5-8
Lamtor3	3.79535e-15	0.369003	0.825	0.513	1.06262e-10	E15.5-8
1500009L16Rik	5.60233e-10	0.368341	0.732	0.473	1.56854e-05	E15.5-8
Dcdc2a	1.01977e-44	0.368147	0.33	0.031	2.85515e-40	E15.5-8
Degs1	1.7262e-13	0.36811	0.557	0.259	4.833e-09	E15.5-8
Rpl14	1.00323e-28	0.367163	1	0.998	2.80884e-24	E15.5-8
Srgn	3.17468e-108	0.366685	0.381	0.01	8.88847e-104	E15.5-8
Abhd4	2.19308e-22	0.366176	0.371	0.081	6.14018e-18	E15.5-8
Ptpn13	1.08933e-75	0.365574	0.412	0.025	3.0499e-71	E15.5-8
Rps3	6.9571e-27	0.364653	1	0.998	1.94785e-22	E15.5-8
Rps27l	5.75908e-14	0.36442	0.99	0.869	1.61243e-09	E15.5-8
Trp53i13	4.98295e-69	0.364263	0.505	0.046	1.39513e-64	E15.5-8
Rpl21	2.0477e-23	0.363434	1	0.999	5.73314e-19	E15.5-8
Col27a1	1.55778e-86	0.363152	0.309	0.008	4.36147e-82	E15.5-8
Magt1	2.19832e-33	0.362499	0.433	0.077	6.15484e-29	E15.5-8
Mrc2	2.34872e-156	0.362279	0.392	0.002	6.57593e-152	E15.5-8
Adk	3.47274e-25	0.361818	0.485	0.126	9.72297e-21	E15.5-8
Sdf4	1.76858e-09	0.361714	0.784	0.542	4.95166e-05	E15.5-8
Slc6a9	2.81841e-55	0.361522	0.33	0.023	7.89098e-51	E15.5-8
Sec61b	4.90983e-16	0.360685	0.99	0.94	1.37465e-11	E15.5-8
Ckap4	2.92317e-09	0.360348	0.753	0.526	8.18428e-05	E15.5-8
Cib1	4.81044e-36	0.358875	0.485	0.088	1.34683e-31	E15.5-8
Prdx5	1.39755e-12	0.358351	0.979	0.881	3.91286e-08	E15.5-8
Lama4	2.39283e-138	0.357904	0.351	0.002	6.69946e-134	E15.5-8
Fuca1	5.39572e-16	0.357213	0.649	0.299	1.51069e-11	E15.5-8
Hist1h2bc	2.64485e-12	0.357079	0.392	0.136	7.40506e-08	E15.5-8
Plod1	9.35887e-80	0.356751	0.392	0.02	2.6203e-75	E15.5-8
Tpx2	2.16158e-26	0.356653	0.144	0.009	6.05199e-22	E15.5-8
Hmgb1	0.000563288	0.356615	1	0.994	1	E15.5-8
Gm10837	1.311e-100	0.355156	0.351	0.009	3.67054e-96	E15.5-8
Hdac1	7.41634e-14	0.354064	0.742	0.4	2.07643e-09	E15.5-8
Pbxip1	5.10145e-55	0.353698	0.412	0.038	1.42831e-50	E15.5-8
Rpl34	5.36308e-22	0.353189	1	0.996	1.50155e-17	E15.5-8
Phactr2	4.92442e-40	0.353062	0.485	0.079	1.37874e-35	E15.5-8
Anp32b	2.13562e-07	0.352993	0.897	0.788	0.00597931	E15.5-8
Fzd6	3.27282e-146	0.352816	0.351	0.001	9.16323e-142	E15.5-8
Pgpep1	6.51157e-07	0.352649	0.474	0.259	0.0182311	E15.5-8
E130114P18Rik	5.38287e-40	0.352617	0.227	0.015	1.50709e-35	E15.5-8
Snx21	6.17038e-11	0.352288	0.536	0.266	1.72758e-06	E15.5-8
Tns2	1.67002e-145	0.35201	0.392	0.004	4.67573e-141	E15.5-8
Rps27rt	1.67858e-09	0.351701	0.979	0.88	4.69969e-05	E15.5-8
Capzb	7.60358e-11	0.351638	0.99	0.889	2.12885e-06	E15.5-8
Nfic	7.02636e-26	0.351552	0.433	0.097	1.96724e-21	E15.5-8
Pgam1	6.70048e-07	0.35069	0.948	0.897	0.01876	E15.5-8
Rps5	5.81336e-23	0.349521	1	1	1.62763e-18	E15.5-8
Zeb1	2.25575e-15	0.348423	0.649	0.286	6.31565e-11	E15.5-8
Foxf2	7.17192e-160	0.347571	0.371	0.001	2.00799e-155	E15.5-8
Knstrn	1.99313e-24	0.347424	0.186	0.018	5.58036e-20	E15.5-8
Actn4	1.24727e-16	0.347261	0.608	0.251	3.49209e-12	E15.5-8
Fam174a	1.97024e-20	0.347029	0.557	0.181	5.51628e-16	E15.5-8
Golim4	1.26822e-40	0.347002	0.505	0.084	3.55076e-36	E15.5-8
Dek	3.94039e-05	0.346778	0.711	0.55	1	E15.5-8
Rpl26	8.6346e-23	0.346777	1	0.999	2.41751e-18	E15.5-8
Fermt2	1.40198e-16	0.345548	0.485	0.163	3.92525e-12	E15.5-8
Aplp2	3.66442e-09	0.344978	0.784	0.525	0.000102596	E15.5-8
Wfikkn2	5.06598e-111	0.344877	0.34	0.006	1.41837e-106	E15.5-8
Ptgis	7.20863e-95	0.344739	0.289	0.005	2.01827e-90	E15.5-8
Tmem123	1.20744e-75	0.344288	0.454	0.031	3.38059e-71	E15.5-8
Gstm1	3.9763e-14	0.344262	0.546	0.226	1.11329e-09	E15.5-8
Rspo3	3.47615e-21	0.344229	0.206	0.027	9.73252e-17	E15.5-8
Rnf26	5.81081e-16	0.343996	0.412	0.132	1.62691e-11	E15.5-8
Gnai2	2.88638e-11	0.342116	0.979	0.886	8.08129e-07	E15.5-8
Clmp	2.34775e-07	0.341005	0.608	0.414	0.00657323	E15.5-8
Smim15	2.1627e-14	0.340547	0.557	0.235	6.05513e-10	E15.5-8
Rps10	1.67496e-21	0.340522	1	0.997	4.68955e-17	E15.5-8
Dhrs3	6.14853e-75	0.339804	0.309	0.011	1.72146e-70	E15.5-8
Nde1	6.06684e-55	0.339684	0.258	0.012	1.69859e-50	E15.5-8
Rassf8	1.40276e-49	0.339278	0.443	0.052	3.92746e-45	E15.5-8
Glipr2	5.79929e-14	0.338803	0.485	0.195	1.62369e-09	E15.5-8
BC028528	6.03888e-100	0.338555	0.361	0.01	1.69076e-95	E15.5-8
Krcc1	2.88313e-17	0.33848	0.588	0.218	8.07219e-13	E15.5-8
Fkbp14	5.75011e-34	0.337987	0.392	0.061	1.60992e-29	E15.5-8
Bet1	6.72978e-14	0.337405	0.526	0.216	1.8842e-09	E15.5-8
Rpl27a	1.03639e-21	0.337211	1	0.997	2.90168e-17	E15.5-8
Rpl8	4.96826e-24	0.337065	1	0.998	1.39101e-19	E15.5-8
Hexa	1.85102e-13	0.336958	0.711	0.401	5.18248e-09	E15.5-8
Rbpms	1.12108e-115	0.336874	0.371	0.007	3.13881e-111	E15.5-8
Atf3	1.21981e-65	0.33686	0.34	0.019	3.41522e-61	E15.5-8
Rplp2	1.67503e-23	0.336802	1	0.999	4.68974e-19	E15.5-8
Sept9	1.71999e-13	0.336146	0.835	0.485	4.81562e-09	E15.5-8
Evi5	2.87399e-17	0.336143	0.567	0.207	8.04659e-13	E15.5-8
Myadm	8.56854e-21	0.33608	0.423	0.113	2.39902e-16	E15.5-8
Scp2	1.21255e-07	0.335546	0.876	0.72	0.00339491	E15.5-8
Plagl1	8.46227e-18	0.335368	0.443	0.132	2.36927e-13	E15.5-8
Bcap31	4.71654e-12	0.335246	0.784	0.488	1.32054e-07	E15.5-8
Phldb2	1.49466e-68	0.334992	0.361	0.021	4.18474e-64	E15.5-8
Camk2n1	8.14132e-05	0.33483	0.825	0.665	1	E15.5-8
Sepn1	1.41496e-13	0.334434	0.577	0.264	3.96161e-09	E15.5-8
Rbms3	2.71865e-13	0.334251	0.454	0.171	7.61166e-09	E15.5-8
Llgl1	1.19871e-11	0.333906	0.485	0.208	3.35615e-07	E15.5-8
Il34	6.02555e-114	0.333095	0.32	0.004	1.68703e-109	E15.5-8
Slc35b2	1.43532e-15	0.332922	0.546	0.218	4.01862e-11	E15.5-8
P2ry1	5.93508e-72	0.332398	0.381	0.022	1.6617e-67	E15.5-8
Slc30a10	4.1504e-58	0.330053	0.381	0.031	1.16203e-53	E15.5-8
Rpl10	4.30467e-17	0.330023	1	1	1.20522e-12	E15.5-8
Reep3	1.32583e-17	0.329461	0.536	0.184	3.71205e-13	E15.5-8
Abracl	5.28102e-10	0.329056	0.732	0.446	1.47858e-05	E15.5-8
Tjp2	5.89066e-88	0.329045	0.423	0.021	1.64927e-83	E15.5-8
Nr2f6	1.61282e-14	0.328612	0.515	0.205	4.51557e-10	E15.5-8
Ddr2	9.09154e-131	0.328605	0.351	0.003	2.54545e-126	E15.5-8
Pear1	3.26879e-116	0.327794	0.309	0.003	9.15195e-112	E15.5-8
Parm1	1.43191e-56	0.327554	0.351	0.026	4.00907e-52	E15.5-8
Plekhg1	1.86561e-60	0.326944	0.33	0.02	5.22332e-56	E15.5-8
Mrfap1	5.1506e-13	0.326718	1	0.98	1.44206e-08	E15.5-8
Rnh1	1.33359e-13	0.326695	0.649	0.314	3.73378e-09	E15.5-8
Tmem59	4.73967e-11	0.326348	0.959	0.867	1.32701e-06	E15.5-8
Prorsd1	4.77696e-22	0.326184	0.423	0.105	1.33745e-17	E15.5-8
Dnajc3	3.0389e-22	0.326023	0.485	0.134	8.50832e-18	E15.5-8
Ndufa13	2.30511e-11	0.325639	0.99	0.962	6.45383e-07	E15.5-8
Anp32e	0.000113672	0.32539	0.732	0.573	1	E15.5-8
Csrp1	2.70869e-60	0.325335	0.289	0.014	7.58378e-56	E15.5-8
P3h1	4.65588e-79	0.325286	0.423	0.025	1.30355e-74	E15.5-8
Rpl31	3.75778e-20	0.324614	1	0.998	1.0521e-15	E15.5-8
Crispld2	4.87791e-120	0.324366	0.309	0.002	1.36572e-115	E15.5-8
Acadm	1.4831e-08	0.324168	0.536	0.297	0.000415239	E15.5-8
Tnfaip8	6.05227e-119	0.323974	0.392	0.008	1.69452e-114	E15.5-8
Arhgap31	2.65838e-73	0.323542	0.371	0.02	7.44293e-69	E15.5-8
Fam20c	2.67242e-05	0.323403	0.536	0.384	0.748223	E15.5-8
Yipf5	2.77652e-06	0.322827	0.67	0.499	0.0777371	E15.5-8
Fbn1	8.84622e-72	0.322632	0.361	0.019	2.47676e-67	E15.5-8
Aga	1.64484e-23	0.322605	0.474	0.124	4.60523e-19	E15.5-8
Bmpr1a	3.69252e-21	0.322184	0.526	0.16	1.03383e-16	E15.5-8
Zic2	5.77845e-79	0.322147	0.361	0.016	1.61785e-74	E15.5-8
Rpl5	2.2881e-14	0.321711	1	0.986	6.40621e-10	E15.5-8
Rpl9	2.35631e-22	0.321631	1	0.998	6.5972e-18	E15.5-8
Npr3	2.88475e-114	0.321412	0.268	0.001	8.07672e-110	E15.5-8
Bcl2l12	9.36883e-116	0.321129	0.371	0.007	2.62309e-111	E15.5-8
Rpl35a	6.9025e-18	0.321063	1	0.998	1.93256e-13	E15.5-8
Ptrf	5.26565e-112	0.320904	0.299	0.003	1.47428e-107	E15.5-8
Ccdc102a	3.64238e-166	0.320579	0.423	0.003	1.01979e-161	E15.5-8
Npas3	3.8473e-07	0.31974	0.289	0.122	0.0107717	E15.5-8
Rps12-ps3	4.02993e-10	0.319576	0.784	0.509	1.1283e-05	E15.5-8
Rnf13	1.40222e-10	0.319522	0.546	0.268	3.92594e-06	E15.5-8
Msrb1	4.187e-13	0.319387	0.577	0.273	1.17228e-08	E15.5-8
Fam162a	2.12198e-09	0.318229	0.773	0.504	5.94111e-05	E15.5-8
Tgif2	1.8053e-86	0.317536	0.34	0.011	5.05449e-82	E15.5-8
Eny2	3.7231e-10	0.317289	0.907	0.731	1.04239e-05	E15.5-8
Emc7	6.55829e-12	0.31695	0.794	0.524	1.83619e-07	E15.5-8
Pnrc1	1.34372e-07	0.316661	0.732	0.528	0.00376213	E15.5-8
Sec24d	5.09594e-71	0.316588	0.361	0.02	1.42676e-66	E15.5-8
Dlc1	7.29263e-81	0.316524	0.402	0.021	2.04179e-76	E15.5-8
Agtrap	7.32937e-124	0.31579	0.371	0.006	2.05208e-119	E15.5-8
Ssr1	5.89982e-11	0.315739	0.866	0.595	1.65183e-06	E15.5-8
Hbp1	1.34747e-17	0.315598	0.485	0.156	3.77263e-13	E15.5-8
Cd82	9.66681e-37	0.31493	0.227	0.017	2.70651e-32	E15.5-8
Ccdc8	2.37185e-35	0.314759	0.412	0.062	6.64071e-31	E15.5-8
Col2a1	1.03715e-13	0.314691	0.299	0.082	2.90381e-09	E15.5-8
Frmd6	3.44987e-104	0.314503	0.371	0.01	9.65893e-100	E15.5-8
Spcs1	1.20018e-10	0.313925	0.969	0.886	3.36026e-06	E15.5-8
Sned1	1.60817e-86	0.313335	0.247	0.003	4.50255e-82	E15.5-8
Smad3	4.05835e-104	0.31326	0.371	0.01	1.13626e-99	E15.5-8
Mesdc2	4.11027e-12	0.313219	0.68	0.386	1.15079e-07	E15.5-8
Anpep	1.63744e-146	0.313147	0.351	0.001	4.58449e-142	E15.5-8
Pdlim4	6.82843e-34	0.312323	0.278	0.029	1.91182e-29	E15.5-8
Fundc2	2.79015e-09	0.312317	0.897	0.701	7.81185e-05	E15.5-8
Atraid	9.61701e-10	0.312067	0.918	0.718	2.69257e-05	E15.5-8
Snap23	1.49002e-40	0.311494	0.433	0.062	4.17177e-36	E15.5-8
Hspb11	7.95822e-13	0.311282	0.68	0.34	2.22814e-08	E15.5-8
Mro	1.43904e-96	0.311266	0.299	0.005	4.02902e-92	E15.5-8
Comt	3.34462e-06	0.310683	0.845	0.68	0.0936427	E15.5-8
Atox1	5.2579e-09	0.309863	0.938	0.776	0.000147211	E15.5-8
Rps25	3.24501e-17	0.309367	1	0.997	9.08537e-13	E15.5-8
Ext2	4.94038e-08	0.309151	0.588	0.351	0.00138321	E15.5-8
Rps14	1.17977e-16	0.308955	1	1	3.30311e-12	E15.5-8
Sertad1	3.6092e-43	0.308573	0.34	0.034	1.01051e-38	E15.5-8
Cmc2	1.28314e-11	0.308104	0.505	0.232	3.59254e-07	E15.5-8
Spr	8.4026e-23	0.308104	0.402	0.095	2.35256e-18	E15.5-8
Ccdc80	6.09015e-78	0.307713	0.247	0.005	1.70512e-73	E15.5-8
B230118H07Rik	1.38778e-09	0.307367	0.515	0.266	3.88551e-05	E15.5-8
Itgb3bp	1.80473e-21	0.306915	0.464	0.129	5.05288e-17	E15.5-8
Litaf	1.03965e-46	0.306825	0.351	0.033	2.9108e-42	E15.5-8
Mrgprf	8.38157e-101	0.306781	0.247	0.001	2.34667e-96	E15.5-8
Arl1	7.19039e-08	0.306373	0.897	0.738	0.00201317	E15.5-8
Toporsos	1.82808e-20	0.306209	0.515	0.152	5.11826e-16	E15.5-8
Dock6	1.39475e-107	0.306086	0.351	0.007	3.90502e-103	E15.5-8
Creb3l2	4.8105e-121	0.305569	0.371	0.006	1.34684e-116	E15.5-8
Efcc1	2.23782e-80	0.30539	0.299	0.009	6.26544e-76	E15.5-8
Topors	9.51168e-10	0.305299	0.557	0.294	2.66308e-05	E15.5-8
Pnrc2	1.82128e-09	0.305273	0.691	0.398	5.09921e-05	E15.5-8
Serpinb6a	2.01821e-12	0.304982	0.474	0.199	5.65057e-08	E15.5-8
Wasf2	2.51176e-25	0.304916	0.392	0.08	7.03241e-21	E15.5-8
Cdk2	1.34769e-100	0.303026	0.351	0.009	3.77325e-96	E15.5-8
Sh3d19	2.89539e-38	0.302757	0.392	0.055	8.10653e-34	E15.5-8
Laptm4b	7.26538e-18	0.302717	0.536	0.178	2.03416e-13	E15.5-8
Stt3a	5.41744e-12	0.302338	0.577	0.278	1.51677e-07	E15.5-8
Racgap1	0.00219178	0.301924	0.186	0.097	1	E15.5-8
Jtb	1.49504e-07	0.301811	0.701	0.501	0.00418581	E15.5-8
Mrps14	8.81839e-10	0.301505	0.825	0.647	2.46897e-05	E15.5-8
Rps13	5.21071e-18	0.301057	1	0.998	1.4589e-13	E15.5-8
Rps24	3.78313e-21	0.301026	1	0.999	1.0592e-16	E15.5-8
Fam132a	1.95881e-30	0.301015	0.361	0.058	5.48429e-26	E15.5-8
C1qtnf6	4.61289e-94	0.300796	0.34	0.009	1.29152e-89	E15.5-8
Wdr61	7.50406e-09	0.30052	0.773	0.521	0.000210099	E15.5-8
Lta4h	2.11652e-10	0.299707	0.495	0.218	5.92582e-06	E15.5-8
Tmem230	1.0578e-12	0.298982	0.588	0.267	2.96162e-08	E15.5-8
9530068E07Rik	1.04559e-09	0.298957	0.804	0.537	2.92745e-05	E15.5-8
Rps26	4.40659e-12	0.29873	1	0.995	1.23376e-07	E15.5-8
Pabpc1	5.50721e-09	0.298442	0.969	0.937	0.000154191	E15.5-8
Qars	1.08394e-09	0.297689	0.701	0.404	3.0348e-05	E15.5-8
Capn2	3.90194e-07	0.297649	0.588	0.382	0.0109246	E15.5-8
Tcf7	7.1862e-122	0.297551	0.33	0.003	2.01199e-117	E15.5-8
Prrx2	1.47759e-141	0.297147	0.34	0.001	4.13695e-137	E15.5-8
Slc9a3r2	2.77129e-14	0.296975	0.474	0.183	7.75906e-10	E15.5-8
H2-T22	7.43831e-56	0.296883	0.351	0.026	2.08258e-51	E15.5-8
Taf6l	5.5253e-10	0.29669	0.536	0.268	1.54697e-05	E15.5-8
Ergic3	2.26783e-09	0.29616	0.969	0.887	6.34946e-05	E15.5-8
Foxq1	6.68888e-119	0.294448	0.289	0.001	1.87275e-114	E15.5-8
Atf1	6.6813e-21	0.294243	0.443	0.117	1.87063e-16	E15.5-8
Creb5	1.6539e-55	0.294214	0.34	0.024	4.6306e-51	E15.5-8
Egflam	1.16197e-110	0.294146	0.32	0.004	3.25328e-106	E15.5-8
Ephb4	2.74254e-137	0.29407	0.34	0.002	7.67856e-133	E15.5-8
Flnc	1.1074e-132	0.293728	0.32	0.001	3.10051e-128	E15.5-8
Wnt5a	1.61516e-28	0.293365	0.381	0.066	4.52212e-24	E15.5-8
Rdx	1.45617e-08	0.293277	0.866	0.615	0.000407697	E15.5-8
Fgd6	1.30061e-70	0.293251	0.32	0.014	3.64144e-66	E15.5-8
Fau	8.29992e-18	0.293019	1	0.998	2.32381e-13	E15.5-8
Lsr	3.49373e-24	0.292981	0.289	0.047	9.78174e-20	E15.5-8
Map2k3	1.98577e-21	0.292753	0.351	0.076	5.55975e-17	E15.5-8
Nfix	4.4486e-15	0.29254	0.33	0.085	1.24552e-10	E15.5-8
Txndc12	9.94076e-11	0.292461	0.701	0.42	2.78321e-06	E15.5-8
Twsg1	1.31808e-08	0.292005	0.557	0.299	0.000369036	E15.5-8
Stk39	2.38014e-11	0.291179	0.495	0.213	6.66391e-07	E15.5-8
Igf2bp1	6.15469e-24	0.291155	0.495	0.125	1.72319e-19	E15.5-8
Pcdh18	1.0797e-44	0.29113	0.32	0.028	3.02296e-40	E15.5-8
Rarb	6.04727e-25	0.290881	0.361	0.068	1.69311e-20	E15.5-8
Smc2	0.00861855	0.290723	0.278	0.192	1	E15.5-8
Mif4gd	1.73718e-48	0.290633	0.371	0.036	4.86376e-44	E15.5-8
Smim11	1.08915e-10	0.290308	0.691	0.377	3.04939e-06	E15.5-8
Hspg2	2.22339e-95	0.289883	0.309	0.006	6.22504e-91	E15.5-8
Plod2	1.13649e-23	0.289852	0.371	0.078	3.18194e-19	E15.5-8
Fdx1	9.81767e-10	0.289668	0.515	0.261	2.74875e-05	E15.5-8
Slc1a5	8.1218e-37	0.288897	0.289	0.029	2.27394e-32	E15.5-8
Chmp2b	4.13549e-09	0.288837	0.546	0.297	0.000115786	E15.5-8
Hebp1	3.41758e-32	0.288833	0.351	0.051	9.56854e-28	E15.5-8
Lgr4	2.1876e-13	0.288804	0.371	0.12	6.12485e-09	E15.5-8
Tpp1	1.79134e-20	0.2884	0.474	0.132	5.01538e-16	E15.5-8
Pmf1	5.97235e-11	0.288345	0.412	0.166	1.67214e-06	E15.5-8
Serinc3	6.42578e-08	0.288273	0.742	0.545	0.00179909	E15.5-8
Rpl37a	4.67211e-17	0.288209	1	1	1.3081e-12	E15.5-8
Spata6	3.90627e-58	0.288181	0.381	0.03	1.09368e-53	E15.5-8
Pcna	0.00154857	0.288163	0.402	0.265	1	E15.5-8
Pdia4	3.13522e-09	0.288027	0.598	0.336	8.77798e-05	E15.5-8
Ptgr1	9.47003e-93	0.286641	0.33	0.009	2.65142e-88	E15.5-8
Rps21	2.11785e-14	0.286514	1	0.996	5.92955e-10	E15.5-8
Anapc13	2.98785e-08	0.286301	0.938	0.806	0.000836537	E15.5-8
Glt8d1	1.39038e-11	0.286075	0.629	0.315	3.89278e-07	E15.5-8
Lix1l	3.28792e-11	0.2859	0.526	0.235	9.20552e-07	E15.5-8
Rps28	2.37106e-13	0.285855	1	0.998	6.63848e-09	E15.5-8
Erp44	2.31446e-07	0.285751	0.649	0.418	0.00648001	E15.5-8
Capns1	3.66702e-06	0.285565	0.897	0.798	0.102669	E15.5-8
Efnb1	1.30446e-06	0.28528	0.691	0.479	0.0365223	E15.5-8
Pdlim3	4.63722e-40	0.285202	0.134	0.003	1.29833e-35	E15.5-8
Iah1	2.96476e-13	0.285165	0.505	0.197	8.30075e-09	E15.5-8
Tns1	3.48878e-49	0.284977	0.33	0.027	9.76789e-45	E15.5-8
Lpcat3	1.32804e-20	0.284753	0.433	0.115	3.71826e-16	E15.5-8
Nek6	1.10262e-36	0.28461	0.381	0.052	3.08712e-32	E15.5-8
Aurkb	2.10806e-49	0.284484	0.144	0.002	5.90214e-45	E15.5-8
Pdcd4	1.72629e-08	0.2844	0.567	0.297	0.000483328	E15.5-8
Eif1ax	2.93773e-06	0.28434	0.773	0.613	0.0822507	E15.5-8
Olig2	6.47516e-42	0.284202	0.144	0.004	1.81292e-37	E15.5-8
Plekhg2	1.77086e-46	0.284177	0.381	0.039	4.95805e-42	E15.5-8
Sec31a	2.11379e-08	0.283781	0.567	0.317	0.000591819	E15.5-8
Tob2	1.5609e-20	0.283611	0.423	0.108	4.3702e-16	E15.5-8
Tnfsf12	9.6711e-42	0.283093	0.299	0.027	2.70771e-37	E15.5-8
Gins2	7.47009e-18	0.282969	0.206	0.032	2.09148e-13	E15.5-8
Plin2	4.4476e-20	0.282716	0.536	0.171	1.24524e-15	E15.5-8
Dhrs4	1.51846e-15	0.282536	0.402	0.128	4.2514e-11	E15.5-8
Gmds	1.31528e-10	0.282231	0.464	0.212	3.68252e-06	E15.5-8
Hadha	1.72012e-09	0.282193	0.639	0.347	4.816e-05	E15.5-8
Rps6	3.83624e-15	0.281767	1	0.997	1.07407e-10	E15.5-8
Pdia3	3.69522e-06	0.28171	0.887	0.812	0.103459	E15.5-8
Eif3k	9.20059e-10	0.281675	0.99	0.96	2.57598e-05	E15.5-8
Notch1	1.594e-62	0.281096	0.268	0.011	4.46288e-58	E15.5-8
Asgr1	6.18498e-42	0.280888	0.165	0.006	1.73167e-37	E15.5-8
Slc35a1	3.77611e-08	0.280023	0.598	0.354	0.00105723	E15.5-8
Qsox1	5.87259e-16	0.279947	0.454	0.146	1.64421e-11	E15.5-8
2310022B05Rik	7.04886e-05	0.279893	0.433	0.28	1	E15.5-8
Cnih4	4.52106e-12	0.279816	0.608	0.29	1.26581e-07	E15.5-8
Sfr1	3.71068e-06	0.279786	0.887	0.767	0.103892	E15.5-8
Npm3	2.62103e-07	0.279582	0.701	0.44	0.00733837	E15.5-8
Heg1	7.64973e-96	0.279116	0.361	0.011	2.14177e-91	E15.5-8
Arhgap28	6.30858e-47	0.279005	0.34	0.031	1.76628e-42	E15.5-8
Rgcc	4.76817e-21	0.27892	0.206	0.027	1.33499e-16	E15.5-8
Mrpl17	1.32646e-08	0.27839	0.845	0.6	0.000371383	E15.5-8
Tmco1	1.29448e-08	0.278005	0.876	0.617	0.000362429	E15.5-8
Siah2	1.26463e-08	0.277739	0.505	0.261	0.00035407	E15.5-8
Cope	1.55039e-06	0.277714	0.876	0.767	0.0434078	E15.5-8
Zyx	3.12729e-08	0.277598	0.515	0.277	0.000875578	E15.5-8
Rpl18	4.32378e-17	0.277565	1	0.998	1.21057e-12	E15.5-8
Pmm1	3.39973e-07	0.277536	0.608	0.365	0.00951857	E15.5-8
Wnt7b	7.69306e-08	0.277155	0.175	0.05	0.0021539	E15.5-8
Gabarap	3.49321e-10	0.277111	1	0.98	9.7803e-06	E15.5-8
Pdcd6	1.13325e-07	0.277083	0.804	0.558	0.00317287	E15.5-8
Aldh2	1.44045e-08	0.27697	0.691	0.396	0.000403296	E15.5-8
Sipa1	1.73368e-31	0.276926	0.392	0.066	4.85395e-27	E15.5-8
H2-Ke6	0.000379725	0.27671	0.577	0.406	1	E15.5-8
Tpd52l2	2.30443e-10	0.276548	0.804	0.548	6.45194e-06	E15.5-8
Chpf	1.51224e-07	0.276543	0.495	0.262	0.00423398	E15.5-8
Snta1	3.22561e-26	0.276179	0.412	0.084	9.03105e-22	E15.5-8
Anp32a	1.95265e-06	0.276116	0.948	0.794	0.0546703	E15.5-8
Arap1	6.10514e-33	0.27559	0.309	0.038	1.70932e-28	E15.5-8
Acyp2	1.51182e-18	0.274889	0.474	0.144	4.23279e-14	E15.5-8
Antxr1	2.42046e-63	0.274829	0.299	0.014	6.7768e-59	E15.5-8
Acsf2	2.2627e-103	0.274618	0.309	0.005	6.3351e-99	E15.5-8
Lage3	1.38191e-09	0.274095	0.722	0.452	3.86907e-05	E15.5-8
Tmem106b	3.41817e-12	0.274095	0.526	0.237	9.57019e-08	E15.5-8
Gm2a	7.8758e-23	0.273678	0.423	0.1	2.20507e-18	E15.5-8
Foxo1	5.90724e-21	0.273601	0.371	0.085	1.65391e-16	E15.5-8
Rpl30	2.60465e-15	0.273582	1	0.997	7.2925e-11	E15.5-8
Tmem55a	7.0526e-10	0.273441	0.691	0.385	1.97459e-05	E15.5-8
Dnajc1	2.07101e-14	0.272942	0.423	0.14	5.7984e-10	E15.5-8
Nme4	1.23329e-15	0.272475	0.443	0.147	3.45298e-11	E15.5-8
Tmod3	2.99251e-16	0.272191	0.536	0.198	8.37844e-12	E15.5-8
Limd1	1.61915e-18	0.272146	0.412	0.113	4.5333e-14	E15.5-8
Lsm2	0.000130915	0.271992	0.732	0.564	1	E15.5-8
Dhfr	2.83671e-15	0.271983	0.258	0.057	7.94221e-11	E15.5-8
Ifnar2	1.08428e-25	0.271903	0.381	0.075	3.03576e-21	E15.5-8
Igbp1	3.3778e-09	0.271861	0.639	0.353	9.45716e-05	E15.5-8
Coro1b	7.31748e-09	0.271816	0.639	0.372	0.000204875	E15.5-8
Bcl2	2.77494e-11	0.271747	0.392	0.148	7.76927e-07	E15.5-8
Dnajb9	1.73451e-09	0.271529	0.588	0.309	4.85627e-05	E15.5-8
Tacc3	3.8712e-15	0.270994	0.227	0.046	1.08386e-10	E15.5-8
Rbbp7	2.18483e-06	0.270979	0.845	0.674	0.061171	E15.5-8
Frem1	7.52419e-84	0.270429	0.268	0.005	2.10662e-79	E15.5-8
Lfng	6.57011e-46	0.270304	0.186	0.007	1.8395e-41	E15.5-8
Tgif1	2.4897e-92	0.270284	0.32	0.008	6.97066e-88	E15.5-8
Ccs	8.6811e-10	0.269977	0.567	0.289	2.43053e-05	E15.5-8
Cnbp	1.54648e-08	0.26996	0.99	0.947	0.000432983	E15.5-8
Ramp1	1.7948e-22	0.269922	0.134	0.01	5.02508e-18	E15.5-8
Dse	5.79159e-40	0.269918	0.351	0.04	1.62153e-35	E15.5-8
Echdc2	1.10759e-59	0.269619	0.309	0.017	3.10102e-55	E15.5-8
Selenbp1	3.75192e-40	0.269593	0.392	0.048	1.05046e-35	E15.5-8
Ier5	1.35724e-08	0.269346	0.577	0.302	0.000380001	E15.5-8
Bola3	1.46585e-11	0.269302	0.588	0.271	4.1041e-07	E15.5-8
Loxl1	1.28192e-80	0.269203	0.299	0.009	3.58911e-76	E15.5-8
Fut8	6.41563e-09	0.269013	0.526	0.272	0.000179625	E15.5-8
Aldh4a1	2.49994e-35	0.268893	0.361	0.048	6.99934e-31	E15.5-8
Tmem9	2.39695e-08	0.268776	0.876	0.638	0.000671098	E15.5-8
Cd151	3.454e-14	0.268705	0.567	0.235	9.6705e-10	E15.5-8
Eef2kmt	7.36496e-72	0.268605	0.361	0.019	2.06204e-67	E15.5-8
Rps19	7.11728e-16	0.268335	1	0.998	1.99269e-11	E15.5-8
Ltbr	2.67601e-17	0.267874	0.392	0.106	7.49228e-13	E15.5-8
Sept7	2.48972e-07	0.267694	0.938	0.821	0.00697072	E15.5-8
Mpst	2.177e-09	0.267294	0.495	0.232	6.09518e-05	E15.5-8
Nkx6-1	7.17904e-128	0.267284	0.299	0.001	2.00999e-123	E15.5-8
Mfsd10	2.57325e-12	0.267168	0.505	0.213	7.20458e-08	E15.5-8
Wdr89	3.33125e-08	0.266994	0.948	0.873	0.000932684	E15.5-8
Tm9sf2	1.82656e-09	0.266871	0.608	0.32	5.114e-05	E15.5-8
Cenpw	0.000239307	0.266047	0.237	0.123	1	E15.5-8
Spred1	3.49091e-11	0.266015	0.608	0.301	9.77385e-07	E15.5-8
Atp1b3	4.80616e-07	0.265794	0.691	0.464	0.0134563	E15.5-8
Gpsm2	1.22648e-37	0.265676	0.299	0.03	3.43391e-33	E15.5-8
Lrrk1	5.89871e-77	0.265375	0.289	0.009	1.65152e-72	E15.5-8
Rps17	4.2997e-15	0.265141	1	0.998	1.20383e-10	E15.5-8
Cenpe	1.61961e-21	0.264843	0.144	0.012	4.53459e-17	E15.5-8
Lman2	1.66125e-08	0.264211	0.577	0.319	0.000465117	E15.5-8
Rnaseh2c	2.90905e-06	0.2642	0.68	0.443	0.0814475	E15.5-8
Mapk4	1.10567e-22	0.263926	0.289	0.049	3.09564e-18	E15.5-8
Dag1	9.62282e-11	0.263404	0.598	0.294	2.6942e-06	E15.5-8
Syngr2	4.32884e-54	0.263136	0.34	0.025	1.21199e-49	E15.5-8
Rpl10-ps3	2.00836e-08	0.263108	0.876	0.731	0.000562302	E15.5-8
Clcn2	8.68049e-18	0.262733	0.412	0.119	2.43036e-13	E15.5-8
Ggh	1.10982e-11	0.262671	0.557	0.258	3.10728e-07	E15.5-8
Gltp	2.05081e-14	0.26211	0.433	0.147	5.74185e-10	E15.5-8
Bmp2	3.86481e-47	0.262093	0.237	0.013	1.08207e-42	E15.5-8
Nxn	1.59054e-11	0.261819	0.577	0.271	4.4532e-07	E15.5-8
Pycard	1.56737e-11	0.261709	0.443	0.174	4.38832e-07	E15.5-8
St6galnac3	3.85127e-14	0.261687	0.309	0.084	1.07828e-09	E15.5-8
Eya2	1.13895e-72	0.261476	0.278	0.009	3.18885e-68	E15.5-8
Hadhb	1.19227e-09	0.261372	0.577	0.304	3.33811e-05	E15.5-8
Ebpl	1.6504e-08	0.261339	0.639	0.387	0.000462079	E15.5-8
Gpx1	1.62936e-06	0.261045	0.928	0.735	0.0456187	E15.5-8
Rpl4	7.3319e-15	0.26091	1	0.998	2.05279e-10	E15.5-8
Tspan31	1.14717e-08	0.260651	0.753	0.514	0.000321184	E15.5-8
Alx3	3.18991e-114	0.260557	0.268	0.001	8.93111e-110	E15.5-8
Ube2a	3.36135e-07	0.26043	0.701	0.449	0.00941112	E15.5-8
B9d1	8.55957e-12	0.259745	0.546	0.234	2.39651e-07	E15.5-8
Rer1	2.59009e-07	0.259428	0.918	0.756	0.00725173	E15.5-8
Scara5	1.65885e-91	0.259042	0.216	0.001	4.64444e-87	E15.5-8
Shisa5	1.7859e-07	0.258876	0.515	0.283	0.00500016	E15.5-8
Tmpo	0.00538306	0.258763	0.722	0.631	1	E15.5-8
Trps1	8.78548e-16	0.258637	0.412	0.124	2.45976e-11	E15.5-8
Jak1	5.85902e-09	0.258608	0.526	0.269	0.000164041	E15.5-8
Psrc1	1.38523e-24	0.258512	0.144	0.01	3.87836e-20	E15.5-8
Sar1a	3.52618e-07	0.258299	0.825	0.66	0.0098726	E15.5-8
Pygb	3.10338e-10	0.257921	0.485	0.212	8.68885e-06	E15.5-8
Kbtbd11	1.44564e-16	0.257066	0.351	0.094	4.0475e-12	E15.5-8
Mydgf	4.55439e-07	0.256993	0.794	0.606	0.0127514	E15.5-8
Cacna1g	8.96448e-14	0.25681	0.309	0.086	2.50988e-09	E15.5-8
Rfc1	9.09879e-13	0.25668	0.485	0.187	2.54748e-08	E15.5-8
S100a1	2.25997e-24	0.256451	0.258	0.037	6.32747e-20	E15.5-8
Chst14	1.21882e-71	0.256126	0.32	0.014	3.41244e-67	E15.5-8
Galnt1	3.68652e-08	0.255823	0.546	0.289	0.00103215	E15.5-8
Mgat2	1.54677e-08	0.255779	0.619	0.371	0.000433065	E15.5-8
Ctsa	1.45514e-12	0.255565	0.608	0.287	4.07409e-08	E15.5-8
Slc16a12	1.9487e-101	0.255365	0.258	0.002	5.45596e-97	E15.5-8
Mbtps1	4.1767e-09	0.255207	0.588	0.3	0.000116939	E15.5-8
Pros1	2.11946e-62	0.254677	0.289	0.013	5.93407e-58	E15.5-8
Sdf2	1.61952e-07	0.254322	0.876	0.729	0.00453432	E15.5-8
Ext1	4.24703e-11	0.254257	0.381	0.143	1.18908e-06	E15.5-8
Nudt4	1.75171e-08	0.254219	0.68	0.403	0.000490443	E15.5-8
Clec3b	3.9827e-46	0.254217	0.247	0.015	1.11508e-41	E15.5-8
Gusb	1.38873e-17	0.253995	0.505	0.163	3.88817e-13	E15.5-8
Adam12	1.05415e-52	0.253921	0.227	0.009	2.95142e-48	E15.5-8
Prdx3	1.03827e-06	0.253738	0.732	0.503	0.0290696	E15.5-8
Eef1a1	4.45149e-14	0.253631	1	0.999	1.24633e-09	E15.5-8
Sp3	4.66471e-10	0.253104	0.619	0.314	1.30603e-05	E15.5-8
Spsb2	5.87619e-18	0.253035	0.381	0.101	1.64522e-13	E15.5-8
Rnft1	1.54631e-49	0.252981	0.351	0.031	4.32936e-45	E15.5-8
Emg1	4.75671e-08	0.252639	0.856	0.663	0.00133178	E15.5-8
Pacsin3	5.99687e-92	0.25196	0.33	0.009	1.679e-87	E15.5-8
Msl3	1.01592e-23	0.251899	0.433	0.099	2.84438e-19	E15.5-8
Gmnn	9.8872e-11	0.251858	0.196	0.047	2.76822e-06	E15.5-8
Lipa	1.32615e-16	0.251473	0.34	0.089	3.71294e-12	E15.5-8
S1pr2	1.37911e-32	0.251461	0.32	0.041	3.86122e-28	E15.5-8
Cops7a	1.04814e-08	0.251168	0.68	0.397	0.000293457	E15.5-8
Bckdk	2.6356e-09	0.251023	0.619	0.333	7.37916e-05	E15.5-8
Serhl	1.72617e-72	0.250974	0.34	0.016	4.83293e-68	E15.5-8
Sypl	1.97604e-10	0.25047	0.412	0.164	5.53253e-06	E15.5-8
Rpsa	3.27862e-10	0.25023	1	0.998	9.17949e-06	E15.5-8
Smco4	3.59189e-34	0.250189	0.309	0.037	1.00566e-29	E15.5-8
Josd2	1.26065e-08	0.250101	0.639	0.346	0.000352957	E15.5-8
Nr4a2	5.87648e-84	1.9818	1	0.208	1.6453e-79	E15.5-9
Mt3	1.47218e-24	1.77931	0.848	0.432	4.12182e-20	E15.5-9
C1ql1	2.6319e-30	1.71684	0.443	0.079	7.3688e-26	E15.5-9
Snca	7.25491e-43	1.71042	0.899	0.361	2.03123e-38	E15.5-9
Dmrta2	1.69847e-206	1.39985	0.911	0.037	4.75537e-202	E15.5-9
Ebf2	5.33045e-128	1.28139	0.797	0.057	1.49242e-123	E15.5-9
Cbln2	5.11954e-30	1.28075	0.696	0.214	1.43337e-25	E15.5-9
Tcf4	1.39501e-30	1.12196	0.886	0.479	3.90576e-26	E15.5-9
Neurod1	1.83562e-59	1.07772	0.633	0.087	5.13937e-55	E15.5-9
Snhg11	2.73417e-22	1.06861	0.949	0.649	7.65512e-18	E15.5-9
Elavl2	5.08522e-38	1.06226	0.962	0.543	1.42376e-33	E15.5-9
Bcl11a	2.51837e-28	1.0519	0.937	0.59	7.05094e-24	E15.5-9
Phlda1	2.90951e-33	1.0449	0.835	0.307	8.14605e-29	E15.5-9
Pbx3	5.6201e-56	1.02383	0.848	0.185	1.57352e-51	E15.5-9
Lmx1a	3.56224e-86	1.01451	0.835	0.102	9.97355e-82	E15.5-9
Foxa1	2.04319e-59	0.993652	0.797	0.129	5.72052e-55	E15.5-9
Nxph4	1.98889e-186	0.993472	0.709	0.02	5.56848e-182	E15.5-9
Rmst	4.64217e-35	0.955384	0.975	0.53	1.29971e-30	E15.5-9
Cadm1	9.2225e-26	0.944897	0.962	0.627	2.58212e-21	E15.5-9
Pdzrn4	4.23945e-61	0.932387	0.747	0.121	1.18696e-56	E15.5-9
Lmo4	2.0622e-12	0.929812	0.658	0.34	5.77374e-08	E15.5-9
Ebf3	8.84396e-66	0.908496	0.671	0.085	2.47613e-61	E15.5-9
Pdzrn3	4.3349e-106	0.864861	0.734	0.058	1.21369e-101	E15.5-9
Sybu	6.71729e-28	0.862799	0.772	0.319	1.88071e-23	E15.5-9
Cd47	1.74264e-15	0.859583	0.759	0.495	4.87905e-11	E15.5-9
Chst2	1.60692e-31	0.853707	0.696	0.201	4.49905e-27	E15.5-9
Slc17a6	1.49328e-30	0.850124	0.759	0.27	4.18088e-26	E15.5-9
Klhl1	1.0756e-64	0.837947	0.608	0.07	3.01148e-60	E15.5-9
Nova1	3.54801e-33	0.821486	0.873	0.38	9.93372e-29	E15.5-9
Neurod2	4.30327e-156	0.787232	0.519	0.01	1.20483e-151	E15.5-9
Mab21l2	2.54402e-45	0.779154	0.392	0.039	7.12276e-41	E15.5-9
Glra2	7.22027e-40	0.773289	0.671	0.146	2.02153e-35	E15.5-9
Tmem163	1.68894e-27	0.770564	0.81	0.292	4.7287e-23	E15.5-9
Uncx	7.48942e-69	0.746748	0.709	0.086	2.09689e-64	E15.5-9
Epha5	2.75964e-23	0.738672	0.696	0.255	7.72645e-19	E15.5-9
Prkcb	2.05452e-16	0.738406	0.582	0.247	5.75225e-12	E15.5-9
Dner	2.26538e-23	0.730899	0.937	0.723	6.3426e-19	E15.5-9
Nfia	1.36336e-24	0.721161	0.506	0.121	3.81714e-20	E15.5-9
Myt1l	2.77807e-25	0.715137	0.911	0.505	7.77803e-21	E15.5-9
Id2	1.89619e-06	0.710672	0.481	0.278	0.0530895	E15.5-9
Auts2	5.95662e-22	0.706263	0.911	0.642	1.66773e-17	E15.5-9
Mir124-2hg	4.33247e-40	0.697431	0.785	0.184	1.21301e-35	E15.5-9
Pid1	1.27228e-23	0.694182	0.797	0.328	3.56213e-19	E15.5-9
Cbln1	6.21649e-24	0.691764	0.734	0.267	1.74049e-19	E15.5-9
Chl1	8.12672e-24	0.677708	0.835	0.367	2.27532e-19	E15.5-9
Serpine2	8.65303e-21	0.670957	0.899	0.426	2.42267e-16	E15.5-9
Lingo2	6.08938e-30	0.669642	0.734	0.227	1.70491e-25	E15.5-9
Hpcal1	4.29182e-14	0.65357	0.734	0.459	1.20162e-09	E15.5-9
RP23-291B1.2	1.47669e-63	0.647627	0.684	0.092	4.13443e-59	E15.5-9
Serpini1	4.05859e-28	0.629897	0.81	0.323	1.13632e-23	E15.5-9
Zfp536	2.45249e-34	0.627905	0.646	0.153	6.86648e-30	E15.5-9
Alcam	1.04175e-24	0.627828	0.684	0.216	2.9167e-20	E15.5-9
Lingo1	1.53926e-26	0.62373	0.835	0.335	4.30962e-22	E15.5-9
Cdk14	3.21728e-26	0.621612	0.734	0.259	9.00775e-22	E15.5-9
Tmem158	7.01565e-18	0.619815	0.785	0.412	1.96424e-13	E15.5-9
Bhlhe22	4.72877e-73	0.614266	0.392	0.02	1.32396e-68	E15.5-9
Enc1	1.42427e-19	0.605786	0.924	0.481	3.98767e-15	E15.5-9
Olfm1	5.10947e-12	0.603092	0.899	0.707	1.43055e-07	E15.5-9
Lamp5	2.80849e-114	0.594704	0.367	0.006	7.8632e-110	E15.5-9
Vsnl1	1.86386e-16	0.578065	0.456	0.136	5.21844e-12	E15.5-9
Ppp1r14c	1.80087e-31	0.574422	0.646	0.166	5.04207e-27	E15.5-9
Nfix	5.50905e-16	0.572571	0.354	0.087	1.54242e-11	E15.5-9
Sncb	7.0159e-20	0.570423	0.709	0.279	1.96431e-15	E15.5-9
Csrp2	1.07123e-14	0.567371	0.848	0.593	2.99922e-10	E15.5-9
Fjx1	2.94784e-33	0.5577	0.633	0.147	8.25335e-29	E15.5-9
Elmo1	1.97009e-09	0.552563	0.582	0.326	5.51585e-05	E15.5-9
Plppr1	3.58833e-23	0.551496	0.759	0.283	1.00466e-18	E15.5-9
Necab2	1.98293e-14	0.551141	0.747	0.407	5.5518e-10	E15.5-9
C130021I20Rik	3.0674e-39	0.546012	0.62	0.111	8.5881e-35	E15.5-9
Nxph1	2.19864e-25	0.545268	0.557	0.139	6.15576e-21	E15.5-9
Pcdh17	1.8615e-09	0.543536	0.608	0.358	5.21183e-05	E15.5-9
Tshz1	1.8124e-22	0.537257	0.494	0.129	5.07436e-18	E15.5-9
Celf4	7.89574e-13	0.537245	0.975	0.924	2.21065e-08	E15.5-9
Fam19a5	1.40864e-11	0.532464	0.519	0.222	3.9439e-07	E15.5-9
Cadm2	1.11547e-19	0.532005	0.608	0.211	3.12308e-15	E15.5-9
Fdps	4.03328e-07	0.531175	0.924	0.755	0.0112924	E15.5-9
Podxl2	8.25106e-20	0.53068	1	0.926	2.31013e-15	E15.5-9
Tubb2a	1.68965e-15	0.527182	1	0.966	4.73068e-11	E15.5-9
Chgb	0.00040542	0.519995	0.797	0.686	1	E15.5-9
Nfib	2.93886e-12	0.507396	0.519	0.203	8.22823e-08	E15.5-9
Mapt	3.24687e-20	0.507035	1	0.93	9.0906e-16	E15.5-9
Adra1b	1.05111e-51	0.503727	0.329	0.022	2.94291e-47	E15.5-9
Syt13	8.83473e-14	0.493767	0.646	0.306	2.47355e-09	E15.5-9
Nefl	1.74174e-09	0.489022	0.709	0.393	4.87651e-05	E15.5-9
Tspan13	8.16662e-18	0.485561	0.987	0.917	2.28649e-13	E15.5-9
Camk2n1	3.41287e-10	0.484375	0.873	0.665	9.55534e-06	E15.5-9
Gm2694	6.3249e-12	0.484313	0.722	0.366	1.77084e-07	E15.5-9
Mab21l1	2.31867e-85	0.48279	0.481	0.026	6.49182e-81	E15.5-9
Aplp1	1.09033e-16	0.476603	0.987	0.942	3.0527e-12	E15.5-9
Lrrn3	5.15417e-07	0.475813	0.582	0.372	0.0144306	E15.5-9
App	7.46267e-14	0.474719	0.975	0.805	2.0894e-09	E15.5-9
Cdh13	1.01789e-16	0.47426	0.582	0.208	2.84989e-12	E15.5-9
Pde1a	2.02e-102	0.473362	0.468	0.018	5.65559e-98	E15.5-9
6330403A02Rik	8.89021e-64	0.468408	0.443	0.033	2.48908e-59	E15.5-9
Kcnb2	7.44829e-15	0.463587	0.532	0.201	2.08537e-10	E15.5-9
Bend6	2.07745e-20	0.459373	0.506	0.15	5.81644e-16	E15.5-9
Fgf13	3.49172e-10	0.458233	0.747	0.45	9.77611e-06	E15.5-9
Sez6	3.80553e-15	0.454991	0.595	0.238	1.06547e-10	E15.5-9
Magi1	2.55375e-13	0.452927	0.722	0.395	7.15e-09	E15.5-9
C130071C03Rik	1.06089e-32	0.452398	0.468	0.078	2.97027e-28	E15.5-9
Cspg5	6.66356e-09	0.450479	0.785	0.543	0.000186566	E15.5-9
Gpr162	3.53087e-15	0.449229	0.797	0.429	9.88573e-11	E15.5-9
Rac3	2.62922e-14	0.448731	1	0.803	7.3613e-10	E15.5-9
Tuba1a	7.45399e-16	0.447907	1	1	2.08697e-11	E15.5-9
Gpm6a	2.32901e-15	0.44442	0.975	0.838	6.52076e-11	E15.5-9
Pde3a	1.12241e-69	0.44337	0.418	0.025	3.14253e-65	E15.5-9
BC048546	5.01654e-54	0.441949	0.43	0.037	1.40453e-49	E15.5-9
Ckb	3.21464e-14	0.441706	0.962	0.886	9.00034e-10	E15.5-9
Ebf1	5.00399e-08	0.43904	0.278	0.092	0.00140102	E15.5-9
Foxa2	1.81551e-74	0.438335	0.405	0.021	5.08305e-70	E15.5-9
Meg3	1.02873e-10	0.427208	0.987	0.989	2.88024e-06	E15.5-9
Tubb2b	1.94124e-18	0.426974	1	0.999	5.43509e-14	E15.5-9
Ntng1	1.03947e-10	0.424086	0.532	0.239	2.91032e-06	E15.5-9
Tmem229b	2.08917e-13	0.423015	0.658	0.299	5.84927e-09	E15.5-9
Hmgcs1	5.85594e-08	0.422417	0.962	0.779	0.00163955	E15.5-9
Nsg2	8.12077e-14	0.421629	0.975	0.904	2.27365e-09	E15.5-9
PISD	1.65031e-08	0.42102	0.81	0.565	0.000462053	E15.5-9
G3bp2	2.81618e-12	0.419443	0.949	0.802	7.88474e-08	E15.5-9
Lin7a	4.65838e-10	0.419223	0.608	0.311	1.30425e-05	E15.5-9
Fam110b	2.10048e-10	0.418725	0.772	0.522	5.88091e-06	E15.5-9
Sqle	3.02998e-08	0.418456	0.886	0.632	0.000848334	E15.5-9
Gria3	3.03731e-29	0.415007	0.418	0.07	8.50385e-25	E15.5-9
Lypd1	4.31451e-10	0.414764	0.329	0.111	1.20798e-05	E15.5-9
Nrn1	2.35897e-11	0.414452	0.342	0.104	6.60463e-07	E15.5-9
Atat1	3.6969e-13	0.413848	0.975	0.837	1.03506e-08	E15.5-9
Spint2	4.1086e-10	0.410795	0.759	0.539	1.15033e-05	E15.5-9
Rell2	7.28896e-14	0.408368	0.608	0.269	2.04076e-09	E15.5-9
Cnr1	4.71851e-08	0.408163	0.633	0.378	0.00132109	E15.5-9
Cisd1	6.46044e-12	0.407966	0.924	0.829	1.80879e-07	E15.5-9
Gap43	2.21495e-11	0.406484	1	0.961	6.20141e-07	E15.5-9
Wnt5a	1.81672e-17	0.405811	0.329	0.071	5.08644e-13	E15.5-9
Nsg1	3.20028e-17	0.405048	1	0.968	8.96015e-13	E15.5-9
Plcb1	1.2879e-19	0.40424	0.532	0.158	3.60587e-15	E15.5-9
Stau2	4.14348e-11	0.40416	0.81	0.478	1.16009e-06	E15.5-9
[truncated: 2,045 more rows]

## Sheet: E17.5
Figure 4-Source Data 2 (corresponding to Figure4). Feature genes that define each
subcluster at each of the six developmental stages
Data are sorted from highest to lowest for each subcluster by average log fold-change > 0.25 (avg_logFC)
of gene expression levels in the indicated subcluster relative to all other subclusters.
pct.1, Percentage of cells in the indicated subcluster with significant differential gene expression
pct.2, Percentage of cells in all other subclusters with significant differential gene expression
p-val, p-value
p val adj, adjusted p value for multiple comparisons
The Wilcoxin test was performed to identify differentially expressed genes in each subcluster
Gene	p_val	avg_logFC	pct.1	pct.2	p_val_adj	SubCluster
Pomc	5.49248e-64	1.082	1	1	1.53778e-59	E17.5-1
Cpne4	2.75353e-64	0.724095	0.604	0.132	7.70934e-60	E17.5-1
Calb1	9.42546e-42	0.684098	0.733	0.307	2.63894e-37	E17.5-1
Rnf128	2.92901e-56	0.550791	0.552	0.109	8.20063e-52	E17.5-1
Alcam	3.25216e-37	0.544331	0.569	0.194	9.1054e-33	E17.5-1
D930028M14Rik	7.55197e-15	0.503493	0.236	0.073	2.1144e-10	E17.5-1
Tmeff2	2.43188e-32	0.492215	0.847	0.442	6.80877e-28	E17.5-1
Tbx3os1	8.09841e-17	0.486026	0.604	0.349	2.26739e-12	E17.5-1
Pcsk2	7.0154e-23	0.471175	0.587	0.282	1.96417e-18	E17.5-1
Lhx2	1.04278e-39	0.436246	0.434	0.089	2.91957e-35	E17.5-1
Runx1t1	8.73835e-22	0.42561	0.795	0.509	2.44656e-17	E17.5-1
Slc25a5	2.7574e-15	0.423784	0.896	0.792	7.72016e-11	E17.5-1
Peg3	1.64296e-32	0.420113	0.976	0.897	4.59997e-28	E17.5-1
Etv1	8.3006e-39	0.398913	0.33	0.047	2.324e-34	E17.5-1
Tle4	7.21313e-24	0.388549	0.809	0.517	2.01953e-19	E17.5-1
Tenm1	7.12623e-25	0.361352	0.396	0.121	1.9952e-20	E17.5-1
Ammecr1	1.73439e-20	0.359861	0.458	0.195	4.85595e-16	E17.5-1
Mpped2	1.84252e-17	0.347603	0.844	0.671	5.1587e-13	E17.5-1
Atp1a1	7.07916e-15	0.333282	0.747	0.488	1.98202e-10	E17.5-1
Nefl	6.56534e-11	0.321557	0.5	0.297	1.83817e-06	E17.5-1
Mmd2	6.23429e-20	0.318408	0.462	0.192	1.74548e-15	E17.5-1
Gpc6	3.32092e-31	0.316447	0.372	0.083	9.2979e-27	E17.5-1
Nkx2-4	3.48693e-14	0.308481	0.431	0.207	9.76271e-10	E17.5-1
Isl1	1.35411e-20	0.299332	0.941	0.579	3.79124e-16	E17.5-1
Syt4	2.35474e-13	0.299279	0.872	0.652	6.59281e-09	E17.5-1
Pkib	2.47449e-25	0.296174	0.309	0.074	6.92808e-21	E17.5-1
Igfbp5	3.4878e-14	0.292974	0.503	0.273	9.76515e-10	E17.5-1
Tuba1b	3.07096e-13	0.289466	0.969	0.908	8.59807e-09	E17.5-1
Dbpht2	1.31527e-13	0.288348	0.646	0.417	3.6825e-09	E17.5-1
Pcdh17	1.96994e-14	0.286714	0.681	0.405	5.51543e-10	E17.5-1
Gas7	2.79843e-13	0.284771	0.462	0.251	7.83503e-09	E17.5-1
Tox2	6.34457e-12	0.276767	0.872	0.671	1.77635e-07	E17.5-1
Cda	5.32478e-19	0.275235	0.333	0.112	1.49083e-14	E17.5-1
Ssbp2	2.0471e-11	0.271718	0.795	0.638	5.73148e-07	E17.5-1
Tbx3os2	3.5495e-18	0.267613	0.424	0.172	9.93789e-14	E17.5-1
Camk2d	5.52907e-12	0.266137	0.597	0.38	1.54803e-07	E17.5-1
Atp1b1	1.31618e-11	0.26502	0.899	0.743	3.68504e-07	E17.5-1
Tox	7.7112e-10	0.26481	0.632	0.434	2.15898e-05	E17.5-1
Prokr1	1.14184e-36	0.262972	0.26	0.024	3.19693e-32	E17.5-1
Fam184b	4.31581e-28	0.261931	0.326	0.072	1.20834e-23	E17.5-1
Zim1	2.96846e-10	0.261656	0.493	0.293	8.31109e-06	E17.5-1
Olfm1	1.667e-11	0.261015	0.667	0.456	4.66725e-07	E17.5-1
Gm13889	2.28761e-08	0.258979	0.399	0.229	0.000640486	E17.5-1
Ppp1r1a	7.82197e-11	0.257816	0.868	0.737	2.19e-06	E17.5-1
Grin2b	4.77457e-15	0.256024	0.639	0.373	1.33678e-10	E17.5-1
Ppp1r17	3.18174e-12	0.255089	0.399	0.199	8.90822e-08	E17.5-1
Dpys	1.96974e-25	0.252339	0.271	0.052	5.51487e-21	E17.5-1
Nhlh2	2.38338e-78	1.11288	0.976	0.467	6.67298e-74	E17.5-2
Gm27199	2.64738e-83	1.02712	0.737	0.149	7.41213e-79	E17.5-2
Sox14	3.93958e-84	1.0137	0.789	0.163	1.103e-79	E17.5-2
Tac2	6.66425e-65	0.995632	0.595	0.109	1.86586e-60	E17.5-2
Pgrmc1	9.79644e-76	0.956845	1	0.992	2.74281e-71	E17.5-2
Cited2	3.7672e-60	0.950201	0.883	0.491	1.05474e-55	E17.5-2
Scg2	1.82887e-29	0.89272	0.858	0.717	5.12048e-25	E17.5-2
Ap1s2	1.59458e-43	0.882034	0.891	0.624	4.46449e-39	E17.5-2
Kcnk2	2.428e-44	0.853213	0.846	0.516	6.79792e-40	E17.5-2
Rprm	2.00946e-20	0.812778	0.66	0.395	5.6261e-16	E17.5-2
Lhx5	3.62992e-62	0.795531	0.551	0.1	1.01631e-57	E17.5-2
Tmem35	5.4047e-36	0.767678	0.7	0.349	1.51321e-31	E17.5-2
Mrps11	5.71613e-37	0.665878	0.858	0.592	1.6004e-32	E17.5-2
Esr1	9.09345e-54	0.646556	0.494	0.09	2.54598e-49	E17.5-2
Pde4d	3.49586e-29	0.645629	0.393	0.114	9.78771e-25	E17.5-2
Nr5a2	1.04887e-36	0.635204	0.506	0.159	2.93662e-32	E17.5-2
B630019K06Rik	1.96423e-21	0.628644	0.919	0.851	5.49945e-17	E17.5-2
Btg1	1.00028e-26	0.618014	0.879	0.72	2.80059e-22	E17.5-2
App	2.42907e-30	0.609173	0.915	0.75	6.80091e-26	E17.5-2
Mrap2	6.33767e-50	0.604247	0.466	0.086	1.77442e-45	E17.5-2
Etnk2	1.646e-26	0.582339	0.441	0.161	4.60848e-22	E17.5-2
Adgrl3	9.31077e-30	0.571203	0.769	0.48	2.60683e-25	E17.5-2
Trpc5	9.1111e-42	0.559307	0.421	0.078	2.55092e-37	E17.5-2
Chst2	1.13762e-26	0.546887	0.498	0.185	3.1851e-22	E17.5-2
Pik3r1	1.04629e-25	0.517256	0.838	0.591	2.9294e-21	E17.5-2
Pak3	4.08717e-19	0.512835	0.874	0.807	1.14433e-14	E17.5-2
Fos	1.92425e-10	0.498602	0.579	0.41	5.3875e-06	E17.5-2
Zfos1	1.05256e-21	0.474462	0.943	0.902	2.94695e-17	E17.5-2
Nrep	4.91617e-17	0.465048	0.785	0.684	1.37643e-12	E17.5-2
Nav2	2.78446e-15	0.45804	0.538	0.322	7.79594e-11	E17.5-2
Sox2	1.04874e-13	0.44732	0.737	0.493	2.93626e-09	E17.5-2
Zfp462	4.13529e-15	0.444031	0.599	0.406	1.1578e-10	E17.5-2
Tppp3	1.41612e-13	0.440128	0.789	0.656	3.96485e-09	E17.5-2
Hs3st4	8.35748e-27	0.434556	0.364	0.095	2.33993e-22	E17.5-2
Zbtb20	3.2944e-18	0.433456	0.943	0.848	9.22367e-14	E17.5-2
Igf1r	1.12119e-17	0.425533	0.49	0.238	3.1391e-13	E17.5-2
Cdh8	5.90382e-29	0.423919	0.332	0.072	1.65295e-24	E17.5-2
Pid1	1.00773e-18	0.422367	0.453	0.196	2.82143e-14	E17.5-2
Dgkk	2.78128e-16	0.420103	0.368	0.157	7.78702e-12	E17.5-2
Rap2c	4.1195e-17	0.417898	0.397	0.175	1.15338e-12	E17.5-2
Slit2	6.31758e-21	0.413386	0.368	0.13	1.76879e-16	E17.5-2
Brinp2	1.77414e-16	0.406044	0.385	0.165	4.96723e-12	E17.5-2
Tmem163	8.09806e-16	0.393397	0.372	0.159	2.26729e-11	E17.5-2
Tmem47	7.02482e-17	0.386936	0.486	0.234	1.96681e-12	E17.5-2
Mta3	1.02338e-24	0.382654	0.312	0.076	2.86526e-20	E17.5-2
Chgb	1.64149e-14	0.378683	0.785	0.636	4.59584e-10	E17.5-2
Sox11	2.51772e-23	0.377972	0.992	0.963	7.04912e-19	E17.5-2
Akap7	2.7642e-11	0.375581	0.466	0.277	7.73921e-07	E17.5-2
Vcan	3.96971e-11	0.372859	0.466	0.278	1.11144e-06	E17.5-2
Cacna2d1	3.48058e-13	0.368623	0.611	0.406	9.74493e-09	E17.5-2
Vwc2	4.23906e-18	0.36202	0.348	0.123	1.18685e-13	E17.5-2
Csmd1	2.33212e-17	0.361961	0.304	0.101	6.52946e-13	E17.5-2
Kcnc1	2.76883e-09	0.357995	0.595	0.457	7.75218e-05	E17.5-2
Zdbf2	2.0316e-14	0.35662	0.883	0.79	5.68808e-10	E17.5-2
Unc5d	1.70246e-09	0.355554	0.563	0.417	4.76655e-05	E17.5-2
Msi2	3.80912e-13	0.345141	0.672	0.481	1.06648e-08	E17.5-2
Ar	1.85636e-20	0.343115	0.377	0.122	5.19743e-16	E17.5-2
Chl1	6.82953e-10	0.342503	0.583	0.433	1.91213e-05	E17.5-2
Brinp1	9.17381e-11	0.342199	0.583	0.419	2.56848e-06	E17.5-2
Fam114a2	8.93874e-10	0.338056	0.575	0.422	2.50267e-05	E17.5-2
Wnt7b	2.54901e-27	0.337689	0.19	0.016	7.13672e-23	E17.5-2
Hnrnpk	8.76868e-22	0.332344	0.996	0.984	2.45505e-17	E17.5-2
Nkx2-1	1.11263e-13	0.328402	0.887	0.748	3.11514e-09	E17.5-2
Zcchc16	6.48226e-22	0.327894	0.227	0.041	1.8149e-17	E17.5-2
Rbms1	8.01766e-10	0.319452	0.425	0.242	2.24478e-05	E17.5-2
Sobp	2.5692e-09	0.316553	0.632	0.512	7.19323e-05	E17.5-2
Pcdh11x	1.50767e-09	0.313357	0.312	0.152	4.22118e-05	E17.5-2
Zfhx3	1.09569e-09	0.310492	0.834	0.717	3.06772e-05	E17.5-2
Kcnd2	1.86823e-05	0.304606	0.405	0.303	0.523066	E17.5-2
Fam155a	9.88301e-08	0.30397	0.543	0.424	0.00276705	E17.5-2
Tmx4	1.99593e-11	0.299985	0.826	0.785	5.5882e-07	E17.5-2
Ucp2	3.46909e-08	0.297471	0.49	0.342	0.000971275	E17.5-2
Miat	7.02734e-08	0.297252	0.668	0.582	0.00196751	E17.5-2
Insm1	2.78775e-08	0.293801	0.429	0.278	0.000780514	E17.5-2
Igfbpl1	2.25806e-11	0.292776	0.457	0.247	6.3221e-07	E17.5-2
3632451O06Rik	3.73407e-16	0.291519	0.259	0.078	1.04547e-11	E17.5-2
Ptprg	1.86214e-10	0.290624	0.3	0.14	5.21363e-06	E17.5-2
Nrp2	5.05744e-11	0.287152	0.567	0.368	1.41598e-06	E17.5-2
Necab2	4.71881e-07	0.285622	0.522	0.399	0.0132117	E17.5-2
Sphkap	2.18908e-17	0.284566	0.255	0.068	6.12898e-13	E17.5-2
Ppp3ca	9.41229e-09	0.284059	0.818	0.775	0.000263525	E17.5-2
Tmeff2	0.000132994	0.280428	0.619	0.524	1	E17.5-2
Gm28040	7.9609e-12	0.280375	0.219	0.07	2.22889e-07	E17.5-2
Fgf13	0.000486012	0.276565	0.425	0.337	1	E17.5-2
Map2	1.11228e-13	0.273702	0.927	0.898	3.11415e-09	E17.5-2
Cxxc5	9.11887e-07	0.272375	0.498	0.36	0.025531	E17.5-2
Gkap1	1.11514e-05	0.271362	0.628	0.557	0.312218	E17.5-2
Aes	3.39454e-10	0.269471	0.883	0.837	9.50404e-06	E17.5-2
Luc7l2	3.06546e-07	0.262216	0.854	0.841	0.00858267	E17.5-2
Cadps2	1.47882e-13	0.262177	0.206	0.059	4.14041e-09	E17.5-2
Tbl1x	2.26576e-05	0.261294	0.437	0.337	0.634366	E17.5-2
Nav1	1.23383e-06	0.259765	0.741	0.713	0.0345447	E17.5-2
BC030500	1.65508e-13	0.259687	0.239	0.078	4.63391e-09	E17.5-2
Srgap3	2.25466e-09	0.258927	0.619	0.493	6.3126e-05	E17.5-2
Ldhb	4.15029e-07	0.258861	0.717	0.629	0.01162	E17.5-2
Wdr6	8.25808e-07	0.253097	0.777	0.76	0.023121	E17.5-2
Mad2l2	3.7668e-05	0.251702	0.64	0.555	1	E17.5-2
H3f3b	1.37416e-21	0.251138	1	0.999	3.84736e-17	E17.5-2
Phldb1	2.24887e-06	0.251009	0.381	0.258	0.0629638	E17.5-2
Npy	5.31918e-30	2.87517	0.587	0.305	1.48926e-25	E17.5-3
Agrp	1.44687e-51	2.25132	0.502	0.108	4.05095e-47	E17.5-3
Otp	1.32498e-176	1.97039	0.983	0.119	3.70969e-172	E17.5-3
Cited1	1.40993e-49	1.47793	0.868	0.657	3.94752e-45	E17.5-3
Sst	4.82906e-20	1.43987	0.204	0.037	1.35204e-15	E17.5-3
Cbln4	1.074e-65	1.10552	0.498	0.062	3.00698e-61	E17.5-3
Dlk1	1.61817e-70	1.02381	0.987	0.685	4.53055e-66	E17.5-3
Calcr	1.73581e-59	0.909375	0.672	0.19	4.85993e-55	E17.5-3
Tbca	5.39555e-74	0.666167	1	0.958	1.51065e-69	E17.5-3
Ap3b1	8.71417e-62	0.641207	0.532	0.085	2.43979e-57	E17.5-3
Peg10	1.41717e-33	0.5701	0.979	0.819	3.9678e-29	E17.5-3
Gpx3	6.80771e-17	0.531104	0.736	0.548	1.90602e-12	E17.5-3
Isl1	1.24273e-18	0.527465	0.881	0.616	3.47938e-14	E17.5-3
Slc32a1	1.56593e-54	0.506118	0.447	0.056	4.38429e-50	E17.5-3
2900055J20Rik	8.93978e-20	0.473763	0.647	0.357	2.50296e-15	E17.5-3
Nap1l5	5.94091e-29	0.452381	0.979	0.947	1.66334e-24	E17.5-3
Tmsb4x	1.0495e-45	0.452205	0.996	0.998	2.93839e-41	E17.5-3
Resp18	2.18399e-12	0.411562	0.881	0.822	6.11475e-08	E17.5-3
Gad1	1.56323e-27	0.400954	0.549	0.202	4.37672e-23	E17.5-3
Ngb	1.03251e-24	0.376056	0.434	0.143	2.89083e-20	E17.5-3
Dbpht2	6.89428e-20	0.375978	0.736	0.407	1.93026e-15	E17.5-3
Tshz2	1.51529e-09	0.353095	0.702	0.533	4.24252e-05	E17.5-3
Prune2	2.02599e-09	0.34857	0.409	0.237	5.67236e-05	E17.5-3
Six6	2.84537e-17	0.347331	0.762	0.439	7.96647e-13	E17.5-3
Chmp4b	1.78412e-15	0.322102	0.902	0.723	4.99517e-11	E17.5-3
Nrxn3	9.08039e-14	0.321369	0.698	0.427	2.54233e-09	E17.5-3
Atp1b1	3.62448e-10	0.318593	0.843	0.767	1.01478e-05	E17.5-3
Foxp1	0.0020939	0.304403	0.421	0.33	1	E17.5-3
Gfra2	2.03406e-15	0.299831	0.332	0.124	5.69497e-11	E17.5-3
Dfna5	1.94566e-09	0.296016	0.472	0.293	5.44747e-05	E17.5-3
Dynll1	2.71611e-17	0.283151	0.987	0.948	7.60456e-13	E17.5-3
Camk1	4.019e-10	0.27744	0.715	0.53	1.12524e-05	E17.5-3
Ntm	0.0002331	0.276435	0.698	0.604	1	E17.5-3
Rai2	6.1349e-24	0.275493	0.315	0.073	1.71765e-19	E17.5-3
Cpa4	4.42488e-10	0.275386	0.217	0.081	1.23888e-05	E17.5-3
Hmgn3	1.28607e-10	0.275114	0.885	0.768	3.60074e-06	E17.5-3
Apbb2	2.81461e-08	0.272061	0.54	0.367	0.000788035	E17.5-3
Itm2a	6.50164e-06	0.270694	0.132	0.051	0.182033	E17.5-3
Tmem255a	1.43504e-15	0.269004	0.319	0.114	4.01782e-11	E17.5-3
Gstp1	1.2051e-08	0.26726	0.791	0.684	0.000337403	E17.5-3
N4bp2l1	5.468e-07	0.26113	0.447	0.294	0.0153093	E17.5-3
Pcsk2	4.18283e-10	0.260979	0.528	0.315	1.17111e-05	E17.5-3
Gabra5	8.81577e-10	0.260546	0.698	0.524	2.46824e-05	E17.5-3
Ecel1	7.42855e-10	0.259541	0.383	0.197	2.07985e-05	E17.5-3
Nr3c1	5.27646e-18	0.259165	0.349	0.116	1.4773e-13	E17.5-3
Ghr	7.88124e-14	0.257803	0.217	0.062	2.20659e-09	E17.5-3
Gabrb3	6.97302e-08	0.25645	0.736	0.602	0.00195231	E17.5-3
Tmie	1.70845e-17	0.256433	0.391	0.144	4.78331e-13	E17.5-3
Ctnnb1	2.61753e-10	0.254155	0.651	0.439	7.32855e-06	E17.5-3
Cadm1	3.0157e-07	0.252994	0.821	0.746	0.00844336	E17.5-3
Efnb2	3.0861e-11	0.252859	0.311	0.135	8.64045e-07	E17.5-3
Nfib	2.03066e-40	1.2512	0.496	0.097	5.68544e-36	E17.5-4
Lmo3	1.01681e-45	1.16323	0.723	0.238	2.84687e-41	E17.5-4
Nfix	1.88841e-55	0.987983	0.475	0.052	5.28717e-51	E17.5-4
Nnat	2.41751e-64	0.894203	1	1	6.76856e-60	E17.5-4
Bcl11b	9.33672e-84	0.887808	0.603	0.049	2.61409e-79	E17.5-4
S100a10	1.1502e-33	0.838177	0.631	0.196	3.22032e-29	E17.5-4
Rbp1	1.94286e-35	0.837409	0.631	0.194	5.43963e-31	E17.5-4
Islr2	8.04395e-46	0.791979	0.638	0.157	2.25214e-41	E17.5-4
Six3	1.7341e-37	0.779845	0.957	0.536	4.85513e-33	E17.5-4
Sox2	4.12611e-34	0.734231	0.915	0.494	1.15523e-29	E17.5-4
Cd24a	2.00721e-30	0.720807	0.972	0.739	5.61977e-26	E17.5-4
Sox4	3.39875e-26	0.672921	1	0.926	9.51583e-22	E17.5-4
Ptn	3.59522e-21	0.66886	0.858	0.522	1.00659e-16	E17.5-4
Enc1	6.8571e-33	0.661853	0.702	0.262	1.91985e-28	E17.5-4
Sox11	8.90778e-20	0.652771	0.993	0.966	2.494e-15	E17.5-4
Prdm12	6.61519e-46	0.642419	0.56	0.103	1.85212e-41	E17.5-4
Cnr1	8.85932e-34	0.636721	0.617	0.188	2.48043e-29	E17.5-4
Tcf4	2.17284e-12	0.617018	0.589	0.366	6.08353e-08	E17.5-4
Tuba1a	1.73849e-22	0.598199	1	1	4.86741e-18	E17.5-4
Igfbpl1	1.61329e-20	0.57315	0.617	0.246	4.51689e-16	E17.5-4
Nkx2-1	6.25754e-21	0.571165	0.95	0.754	1.75199e-16	E17.5-4
Nptx2	6.23207e-27	0.541653	0.504	0.139	1.74485e-22	E17.5-4
Pomc	0.000111018	0.527829	1	1	1	E17.5-4
Celf2	1.60493e-23	0.52425	0.95	0.685	4.49349e-19	E17.5-4
Nfia	1.09915e-18	0.521	0.241	0.044	3.07741e-14	E17.5-4
Slc25a5	1.15442e-10	0.512733	0.908	0.806	3.23214e-06	E17.5-4
Hist3h2a	1.53245e-12	0.510506	0.539	0.271	4.29055e-08	E17.5-4
Eno1	3.48207e-12	0.501423	0.83	0.617	9.74911e-08	E17.5-4
Zbtb20	2.90935e-10	0.488412	0.929	0.86	8.14559e-06	E17.5-4
Chchd10	1.47743e-08	0.473402	0.752	0.587	0.00041365	E17.5-4
Six6	0.00108806	0.47099	0.567	0.497	1	E17.5-4
Rbfox1	1.34865e-18	0.470873	0.624	0.29	3.77594e-14	E17.5-4
Tmeff1	6.78278e-16	0.461332	0.922	0.737	1.89904e-11	E17.5-4
Mt3	5.38189e-08	0.448794	0.709	0.482	0.00150682	E17.5-4
Robo2	3.06172e-24	0.444384	0.376	0.086	8.57221e-20	E17.5-4
Ina	2.50145e-11	0.427263	0.872	0.813	7.00355e-07	E17.5-4
Map1b	1.2082e-27	0.424601	0.993	0.992	3.38271e-23	E17.5-4
Nell2	8.04482e-17	0.424259	0.61	0.292	2.25239e-12	E17.5-4
Tubb2b	1.25432e-23	0.423399	1	1	3.51185e-19	E17.5-4
Rbm3	1.04074e-16	0.414933	0.957	0.831	2.91386e-12	E17.5-4
Serf2	4.16455e-19	0.412423	0.979	0.896	1.16599e-14	E17.5-4
Cacna2d1	5.63952e-14	0.411966	0.709	0.414	1.57895e-09	E17.5-4
Igfbp2	2.0397e-08	0.404195	0.433	0.237	0.000571075	E17.5-4
Klf7	3.25051e-12	0.397819	0.858	0.609	9.10077e-08	E17.5-4
Cdh13	1.72749e-26	0.394044	0.397	0.085	4.83662e-22	E17.5-4
Mapt	6.92871e-18	0.390911	0.993	0.963	1.9399e-13	E17.5-4
Tubb3	2.23091e-19	0.388732	1	0.993	6.24611e-15	E17.5-4
Tubb5	2.80896e-26	0.386929	1	1	7.86451e-22	E17.5-4
Thsd4	1.59685e-22	0.381786	0.34	0.073	4.47087e-18	E17.5-4
Dstn	1.35249e-16	0.374515	0.972	0.889	3.78669e-12	E17.5-4
Ptgds	3.76507e-16	0.373483	0.305	0.079	1.05414e-11	E17.5-4
Sox21	4.61525e-12	0.37271	0.418	0.182	1.29218e-07	E17.5-4
Sox1	7.53998e-11	0.366799	0.652	0.362	2.11104e-06	E17.5-4
Eif4a1	5.20196e-17	0.363135	0.979	0.97	1.45645e-12	E17.5-4
Id2	1.74227e-12	0.356929	0.333	0.114	4.87801e-08	E17.5-4
Rmst	1.02958e-07	0.354328	0.589	0.39	0.00288262	E17.5-4
Srrm4	1.36236e-11	0.352775	0.582	0.323	3.81435e-07	E17.5-4
Bok	1.96987e-13	0.352579	0.546	0.261	5.51524e-09	E17.5-4
Tox3	1.87835e-09	0.344315	0.702	0.49	5.259e-05	E17.5-4
Snn	6.8302e-11	0.342134	0.546	0.288	1.91232e-06	E17.5-4
Ckb	5.9063e-08	0.341004	0.794	0.669	0.00165365	E17.5-4
Ppp1r14b	2.19768e-09	0.339686	0.837	0.63	6.15307e-05	E17.5-4
Stmn1	1.22652e-25	0.331467	1	1	3.434e-21	E17.5-4
Arf6	2.77731e-06	0.329048	0.525	0.338	0.0777591	E17.5-4
Ppib	5.32618e-10	0.328569	0.766	0.548	1.49122e-05	E17.5-4
Mt1	5.03813e-11	0.327976	0.121	0.018	1.41058e-06	E17.5-4
Hn1	3.18822e-20	0.327576	1	0.992	8.92638e-16	E17.5-4
Gm2694	1.11968e-08	0.325845	0.298	0.121	0.000313487	E17.5-4
Hmgb3	1.09482e-14	0.317942	0.993	0.953	3.06528e-10	E17.5-4
Actg1	2.28958e-17	0.317766	1	1	6.41037e-13	E17.5-4
Fscn1	5.50459e-08	0.316304	0.872	0.763	0.00154117	E17.5-4
Fam168b	2.40555e-10	0.315975	0.603	0.349	6.73506e-06	E17.5-4
Rac3	8.85986e-06	0.315632	0.858	0.811	0.248058	E17.5-4
Dpysl2	5.75809e-10	0.31481	1	0.991	1.61215e-05	E17.5-4
Tmem65	3.37371e-10	0.313778	0.61	0.371	9.44572e-06	E17.5-4
Cdkn1c	2.06471e-08	0.313183	0.518	0.289	0.000578076	E17.5-4
Lmo1	1.22391e-10	0.309202	0.248	0.079	3.4267e-06	E17.5-4
Lmnb1	1.85984e-07	0.306933	0.596	0.386	0.00520719	E17.5-4
Sez6	9.85034e-10	0.305215	0.298	0.112	2.7579e-05	E17.5-4
Hmgcs1	1.38099e-07	0.303053	0.83	0.641	0.00386649	E17.5-4
Svbp	7.8383e-10	0.302711	0.816	0.637	2.19457e-05	E17.5-4
Mllt11	1.01202e-17	0.301565	0.993	0.993	2.83346e-13	E17.5-4
Chd7	1.33438e-10	0.301449	0.404	0.178	3.736e-06	E17.5-4
Epha5	9.8728e-06	0.300952	0.39	0.227	0.276419	E17.5-4
Dpysl3	1.7234e-07	0.292921	0.922	0.869	0.00482518	E17.5-4
Zfp422	6.15382e-08	0.292034	0.674	0.464	0.00172295	E17.5-4
Bzw1	7.00595e-08	0.28995	0.801	0.64	0.00196153	E17.5-4
Sbk1	2.96728e-08	0.287729	0.957	0.891	0.000830778	E17.5-4
Nkx2-4	5.51031e-07	0.283433	0.433	0.239	0.0154278	E17.5-4
Calm1	1.61445e-07	0.281859	0.993	0.973	0.00452014	E17.5-4
Actb	4.07778e-07	0.281548	1	0.999	0.011417	E17.5-4
Hpcal1	1.5335e-08	0.281324	0.475	0.263	0.00042935	E17.5-4
Ctnnbip1	4.27547e-08	0.280148	0.794	0.614	0.00119705	E17.5-4
H2-Ab1	1.05622e-37	0.278452	0.191	0.004	2.9572e-33	E17.5-4
Rab18	6.42674e-10	0.278361	0.879	0.678	1.79936e-05	E17.5-4
Elavl4	1.06267e-07	0.277015	0.929	0.869	0.00297526	E17.5-4
Cfl1	4.21597e-18	0.275938	1	0.993	1.18039e-13	E17.5-4
Sept6	1.89949e-07	0.268243	0.475	0.273	0.00531819	E17.5-4
Prmt8	6.71956e-15	0.267907	0.376	0.125	1.88134e-10	E17.5-4
Nudt21	2.19549e-06	0.26735	0.716	0.494	0.0614694	E17.5-4
Crcp	1.24724e-08	0.2664	0.546	0.314	0.000349203	E17.5-4
Apba2	8.81045e-09	0.265493	0.56	0.319	0.000246675	E17.5-4
Rnd3	1.11444e-05	0.263404	0.546	0.386	0.312022	E17.5-4
Carhsp1	1.30857e-06	0.260762	0.645	0.451	0.0366374	E17.5-4
Grm5	1.95799e-05	0.260015	0.348	0.195	0.548199	E17.5-4
Pdap1	1.70613e-07	0.259438	0.943	0.884	0.00477681	E17.5-4
Acat2	0.000507138	0.258118	0.667	0.558	1	E17.5-4
Sox3	1.27315e-11	0.258043	0.376	0.146	3.56458e-07	E17.5-4
Nsg1	1.57924e-09	0.257264	0.993	0.964	4.42154e-05	E17.5-4
Pkm	0.000126386	0.255589	0.901	0.838	1	E17.5-4
Lbh	6.50465e-05	0.253196	0.667	0.529	1	E17.5-4
Mif	2.40769e-08	0.252729	0.993	0.968	0.000674105	E17.5-4
Calm3	1.51108e-10	0.252603	0.986	0.96	4.23073e-06	E17.5-4
Cnn3	4.5979e-07	0.252557	0.362	0.185	0.0128732	E17.5-4
Cdh22	1.90376e-06	0.252127	0.319	0.156	0.0533015	E17.5-4
Prdx2	3.11671e-11	0.250635	0.993	0.991	8.72618e-07	E17.5-4
Fgfr2	2.61365e-32	0.250113	0.191	0.008	7.31769e-28	E17.5-4
Calb2	8.72371e-32	1.06398	0.843	0.287	2.44246e-27	E17.5-5
Tspan7	1.19593e-19	0.715374	0.914	0.529	3.34836e-15	E17.5-5
Id4	8.07253e-17	0.664085	0.671	0.238	2.26015e-12	E17.5-5
Gap43	5.00024e-21	0.588351	1	0.946	1.39997e-16	E17.5-5
Syt4	1.86287e-15	0.582336	0.971	0.69	5.21565e-11	E17.5-5
Nefl	9.40206e-16	0.576209	0.771	0.321	2.63239e-11	E17.5-5
Tubb2a	2.89384e-11	0.537489	0.986	0.96	8.10216e-07	E17.5-5
Nrsn1	4.74653e-12	0.523876	0.857	0.574	1.32893e-07	E17.5-5
Csrp2	2.48073e-08	0.522361	0.771	0.489	0.000694555	E17.5-5
Fabp5	5.6977e-19	0.512693	1	0.951	1.59524e-14	E17.5-5
Fdps	2.31404e-08	0.489374	0.9	0.703	0.000647886	E17.5-5
Uchl1	8.33856e-19	0.465129	1	0.976	2.33463e-14	E17.5-5
Snca	5.07486e-11	0.456676	0.614	0.281	1.42086e-06	E17.5-5
Atp1b1	8.18424e-10	0.446728	0.986	0.769	2.29142e-05	E17.5-5
Kcnip1	1.89324e-12	0.44456	0.729	0.36	5.30069e-08	E17.5-5
Gsto1	1.55241e-10	0.443331	0.671	0.323	4.34643e-06	E17.5-5
Alcam	7.01037e-14	0.423696	0.7	0.262	1.96276e-09	E17.5-5
AI593442	3.38613e-09	0.420325	0.571	0.261	9.4805e-05	E17.5-5
Rgs4	2.84029e-07	0.415462	0.786	0.458	0.00795225	E17.5-5
Arxes2	2.01156e-10	0.407101	0.957	0.758	5.63197e-06	E17.5-5
Cntnap2	3.8857e-12	0.407062	0.771	0.361	1.08792e-07	E17.5-5
Stmn4	2.23323e-10	0.404015	1	0.923	6.2526e-06	E17.5-5
Snhg11	7.66163e-08	0.400854	1	0.841	0.0021451	E17.5-5
Ndn	0.000415591	0.39958	0.886	0.84	1	E17.5-5
Gstp1	9.18709e-08	0.394674	0.929	0.691	0.0025722	E17.5-5
Psma6	4.9468e-12	0.392703	0.971	0.704	1.385e-07	E17.5-5
Mgst3	4.50073e-08	0.387987	0.843	0.572	0.00126011	E17.5-5
Gapdh	1.27277e-13	0.383198	1	0.975	3.5635e-09	E17.5-5
Uchl3	5.12046e-09	0.378769	0.914	0.646	0.000143363	E17.5-5
Snap47	1.47041e-06	0.378202	0.829	0.681	0.0411686	E17.5-5
Ubb	9.55337e-16	0.372366	1	1	2.67475e-11	E17.5-5
Psmb5	3.21372e-09	0.372267	0.986	0.801	8.99779e-05	E17.5-5
Gpr101	5.97885e-13	0.370248	0.457	0.133	1.67396e-08	E17.5-5
Zwint	8.16426e-12	0.368082	1	0.913	2.28583e-07	E17.5-5
Tecr	2.41114e-09	0.367992	1	0.948	6.75072e-05	E17.5-5
Gabra2	3.25355e-12	0.36676	0.657	0.253	9.10928e-08	E17.5-5
Caly	6.37834e-10	0.365213	1	0.867	1.78581e-05	E17.5-5
Ppia	1.71316e-16	0.364919	1	0.998	4.79651e-12	E17.5-5
Mgat4c	4.63282e-14	0.364797	0.429	0.115	1.2971e-09	E17.5-5
Vdac3	1.48801e-10	0.357987	0.971	0.849	4.16612e-06	E17.5-5
Morf4l2	4.71818e-09	0.357281	1	0.943	0.0001321	E17.5-5
Mcts1	2.22576e-07	0.355473	0.929	0.67	0.00623169	E17.5-5
Prmt1	4.75391e-07	0.354672	0.971	0.886	0.01331	E17.5-5
Rit2	1.44573e-06	0.345452	0.929	0.693	0.0404775	E17.5-5
Arpc3	1.78531e-08	0.343763	0.9	0.746	0.00049985	E17.5-5
Calm1	1.53226e-10	0.343269	1	0.974	4.29002e-06	E17.5-5
Rraga	1.07796e-06	0.342888	0.857	0.602	0.0301808	E17.5-5
Aprt	1.61204e-07	0.342612	0.971	0.733	0.0045134	E17.5-5
Ppa1	2.29182e-07	0.341997	0.743	0.465	0.00641664	E17.5-5
Ecel1	1.85076e-09	0.340247	0.543	0.215	5.18174e-05	E17.5-5
Gpm6b	3.03515e-06	0.339206	0.729	0.503	0.0849781	E17.5-5
Itm2c	2.03238e-07	0.336835	0.929	0.722	0.00569026	E17.5-5
Ywhaq	1.36261e-10	0.335789	1	0.964	3.81503e-06	E17.5-5
Ppp1r14c	6.61747e-07	0.334059	0.514	0.243	0.0185276	E17.5-5
Psme1	5.18977e-06	0.333341	0.814	0.548	0.145303	E17.5-5
2900055J20Rik	7.6632e-07	0.332415	0.7	0.399	0.0214554	E17.5-5
Cst3	6.08092e-07	0.331717	1	0.861	0.0170254	E17.5-5
Nipsnap3b	4.27924e-07	0.329594	0.843	0.561	0.011981	E17.5-5
Idi1	1.87662e-07	0.327976	0.614	0.326	0.00525417	E17.5-5
Pafah1b3	5.03513e-10	0.327699	0.986	0.945	1.40974e-05	E17.5-5
Stmn1	4.6964e-16	0.326642	1	1	1.3149e-11	E17.5-5
Stmn3	2.2471e-15	0.325302	1	0.997	6.29143e-11	E17.5-5
Emc4	9.06838e-07	0.32383	0.814	0.528	0.0253897	E17.5-5
Tuba1a	0.000107978	0.322412	1	1	1	E17.5-5
Cox5a	3.65791e-08	0.321766	1	0.895	0.00102414	E17.5-5
Cd200	2.79518e-07	0.321491	0.986	0.866	0.00782594	E17.5-5
Tonsl	6.18892e-07	0.321472	0.957	0.798	0.0173277	E17.5-5
Pou2f2	2.62528e-07	0.321188	0.971	0.842	0.00735026	E17.5-5
Tsc22d1	1.13009e-08	0.320442	1	0.944	0.000316403	E17.5-5
Irs4	5.48208e-07	0.315878	0.686	0.372	0.0153487	E17.5-5
Mdh1	4.29636e-07	0.31565	0.914	0.794	0.0120289	E17.5-5
Fkbp3	4.68003e-06	0.312727	0.971	0.822	0.131031	E17.5-5
Arxes1	1.69808e-05	0.310643	0.871	0.667	0.475428	E17.5-5
Pnck	1.52418e-07	0.310135	0.914	0.616	0.0042674	E17.5-5
A730017C20Rik	4.5992e-05	0.308459	0.857	0.727	1	E17.5-5
Rhob	3.24052e-06	0.306449	0.857	0.586	0.0907281	E17.5-5
Vsnl1	4.77823e-14	0.305612	0.429	0.112	1.33781e-09	E17.5-5
Zcchc12	1.49086e-06	0.304207	1	0.868	0.0417412	E17.5-5
Pcbd1	8.78993e-06	0.301546	0.829	0.601	0.2461	E17.5-5
Psmb2	3.48627e-06	0.301429	0.986	0.853	0.0976085	E17.5-5
Ywhah	7.44456e-09	0.30009	1	0.948	0.000208433	E17.5-5
Pomc	7.21607e-06	0.298964	1	1	0.202036	E17.5-5
Ctsl	0.000245863	0.296902	0.657	0.472	1	E17.5-5
Rrp1	1.05399e-05	0.295427	0.914	0.74	0.295097	E17.5-5
Cited2	2.25149e-06	0.294705	0.886	0.556	0.0630371	E17.5-5
Rbbp7	0.000508946	0.292803	0.714	0.521	1	E17.5-5
Atp5g3	1.40119e-09	0.29254	0.986	0.948	3.92306e-05	E17.5-5
Psmc2	9.97979e-06	0.292378	0.714	0.445	0.279414	E17.5-5
Pdhb	1.31727e-05	0.292296	0.657	0.393	0.368809	E17.5-5
Nkap	2.57084e-08	0.291883	0.7	0.361	0.000719784	E17.5-5
Tspan6	5.93108e-06	0.29125	0.871	0.625	0.166058	E17.5-5
Ndufa4	3.20824e-11	0.290828	1	0.993	8.98244e-07	E17.5-5
Ckb	1.66707e-06	0.290772	0.9	0.671	0.0466746	E17.5-5
Idh1	3.25944e-05	0.290311	0.9	0.707	0.912579	E17.5-5
Asb4	1.49096e-05	0.290094	0.814	0.535	0.417439	E17.5-5
Ndufs3	1.1567e-06	0.290068	0.9	0.663	0.0323852	E17.5-5
Prdx2	5.20805e-12	0.290031	1	0.991	1.45815e-07	E17.5-5
Ntm	5.59896e-07	0.289575	0.9	0.605	0.015676	E17.5-5
Tmeff2	4.94056e-07	0.288264	0.829	0.526	0.0138326	E17.5-5
Cacybp	3.61331e-07	0.287413	0.957	0.82	0.0101166	E17.5-5
Ldhb	0.000273454	0.287261	0.814	0.637	1	E17.5-5
Tceal8	2.7629e-06	0.286255	0.9	0.629	0.0773555	E17.5-5
Calb1	4.98425e-05	0.284174	0.686	0.397	1	E17.5-5
Atp5b	0.00060965	0.283985	0.986	0.937	1	E17.5-5
Ociad1	2.51534e-06	0.281602	0.9	0.723	0.0704245	E17.5-5
Syt1	1.8687e-06	0.279819	0.9	0.59	0.05232	E17.5-5
Myl12b	4.854e-06	0.279646	0.914	0.714	0.135902	E17.5-5
Dtnbp1	5.98225e-06	0.278424	0.743	0.451	0.167491	E17.5-5
Zcchc18	1.96318e-05	0.278154	0.957	0.765	0.549652	E17.5-5
Smim18	7.52649e-06	0.274511	0.757	0.486	0.210727	E17.5-5
Nsfl1c	0.000233731	0.274381	0.729	0.522	1	E17.5-5
Scg5	7.01606e-06	0.274059	1	0.812	0.196436	E17.5-5
Crip2	1.83747e-05	0.273505	0.971	0.837	0.514455	E17.5-5
Timm9	3.52616e-05	0.272468	0.8	0.524	0.987255	E17.5-5
Nefm	3.58618e-08	0.272404	0.343	0.116	0.00100406	E17.5-5
Gcsh	2.1538e-07	0.272401	0.643	0.314	0.00603021	E17.5-5
Atp6v1d	1.93037e-05	0.272242	0.871	0.685	0.540466	E17.5-5
Psmd7	0.000242799	0.271988	0.871	0.664	1	E17.5-5
Tmsb4x	3.50129e-07	0.270707	1	0.997	0.00980291	E17.5-5
Mdh2	1.08909e-05	0.270596	0.914	0.823	0.304922	E17.5-5
Psmd6	0.000583973	0.270535	0.714	0.486	1	E17.5-5
Trappc4	3.50877e-06	0.268573	1	0.849	0.0982385	E17.5-5
Ssu72	4.41121e-05	0.267355	0.886	0.657	1	E17.5-5
Dad1	1.74399e-06	0.266678	0.971	0.867	0.0488283	E17.5-5
Myl6	1.04738e-06	0.266514	0.986	0.956	0.0293245	E17.5-5
Dctn3	1.80087e-07	0.266103	0.986	0.853	0.00504209	E17.5-5
Magi1	9.142e-06	0.265854	0.729	0.447	0.255958	E17.5-5
Rbfox2	2.30695e-06	0.265594	0.986	0.849	0.0645898	E17.5-5
Tsen34	0.00101335	0.265593	0.929	0.765	1	E17.5-5
Rtn3	2.70422e-06	0.264872	0.986	0.904	0.0757128	E17.5-5
Vps29	1.8462e-05	0.264643	0.914	0.676	0.516899	E17.5-5
Uqcrc1	0.0001659	0.263667	0.843	0.642	1	E17.5-5
Rap1b	0.000130417	0.263282	0.829	0.616	1	E17.5-5
Mageh1	3.25872e-07	0.262475	0.986	0.763	0.00912378	E17.5-5
Bzw2	1.43548e-05	0.262457	0.886	0.67	0.401906	E17.5-5
Gpx3	0.000104216	0.260595	0.829	0.571	1	E17.5-5
Apex1	1.85875e-05	0.260043	0.814	0.508	0.520413	E17.5-5
Tmem50a	0.000205149	0.259243	0.886	0.644	1	E17.5-5
Gstm6	7.88512e-07	0.258877	0.571	0.285	0.0220768	E17.5-5
Nme1	2.33161e-08	0.258403	1	0.982	0.000652805	E17.5-5
Sin3b	6.63097e-05	0.257141	0.829	0.565	1	E17.5-5
Ndufb8	6.78741e-07	0.256838	1	0.917	0.0190034	E17.5-5
Gdi1	4.48674e-05	0.256675	0.957	0.853	1	E17.5-5
6330403K07Rik	6.29342e-06	0.255386	1	0.988	0.176203	E17.5-5
Resp18	3.59749e-05	0.255378	0.943	0.827	1	E17.5-5
Tmem59	0.000114251	0.25493	0.914	0.746	1	E17.5-5
Mtx2	3.71826e-05	0.254104	0.757	0.531	1	E17.5-5
Basp1	1.1597e-09	0.253396	1	0.993	3.24692e-05	E17.5-5
Cbr1	9.28452e-06	0.252916	0.829	0.548	0.259948	E17.5-5
Calm2	3.72983e-09	0.252516	1	0.999	0.000104428	E17.5-5
Fxyd6	5.24184e-09	0.251934	1	0.989	0.000146761	E17.5-5
Dtd1	2.07949e-06	0.250815	0.886	0.594	0.0582217	E17.5-5
Pdcl3	3.42389e-05	0.25076	0.743	0.471	0.95862	E17.5-5
Rrad	2.77785e-08	0.250615	0.5	0.2	0.000777742	E17.5-5
Ap2m1	1.05718e-06	0.250501	1	0.927	0.029599	E17.5-5
Fdft1	0.000769772	0.250405	0.7	0.512	1	E17.5-5
Ap1s2	4.23741e-37	1.65987	1	0.663	1.18639e-32	E17.5-6
Tac2	3.29704e-26	1.41605	0.708	0.184	9.23105e-22	E17.5-6
Pcdh19	8.10125e-31	1.31382	0.892	0.386	2.26819e-26	E17.5-6
Rprm	1.17702e-29	1.26449	0.954	0.422	3.29542e-25	E17.5-6
Gadd45g	4.70003e-19	1.15952	0.754	0.351	1.31591e-14	E17.5-6
Gm12027	5.72981e-56	1.081	0.769	0.105	1.60423e-51	E17.5-6
Pcdh11x	3.58803e-34	1.08017	0.708	0.155	1.00458e-29	E17.5-6
Hs6st2	2.61684e-28	1.0442	0.938	0.478	7.32662e-24	E17.5-6
Pid1	3.61176e-35	1.02448	0.815	0.218	1.01122e-30	E17.5-6
Pcp4	1.34602e-20	0.979734	0.985	0.79	3.76858e-16	E17.5-6
Gm28040	1.26716e-53	0.952865	0.646	0.069	3.54779e-49	E17.5-6
Mrps11	3.06942e-19	0.891978	0.908	0.634	8.59377e-15	E17.5-6
Rgs2	3.31493e-14	0.88282	0.646	0.304	9.28114e-10	E17.5-6
Kcnk2	2.56622e-20	0.879388	0.938	0.566	7.18489e-16	E17.5-6
Snhg11	1.03567e-17	0.877858	0.954	0.845	2.89968e-13	E17.5-6
Pik3r1	1.18621e-20	0.852369	0.985	0.624	3.32115e-16	E17.5-6
Sox14	3.10579e-23	0.825556	0.785	0.269	8.69559e-19	E17.5-6
Ramp3	3.52723e-58	0.807746	0.631	0.059	9.87555e-54	E17.5-6
Kcnip4	5.88808e-31	0.790711	0.646	0.139	1.64855e-26	E17.5-6
Ar	5.07575e-25	0.761497	0.615	0.151	1.42111e-20	E17.5-6
Nhlh2	1.80751e-17	0.739553	0.954	0.555	5.06067e-13	E17.5-6
Chst2	5.4659e-13	0.716146	0.585	0.233	1.53034e-08	E17.5-6
Nell1	2.57492e-19	0.700831	0.662	0.224	7.20927e-15	E17.5-6
Gm27199	1.62216e-23	0.693371	0.8	0.245	4.54173e-19	E17.5-6
Rnf138rt1	9.93752e-19	0.687243	0.646	0.223	2.78231e-14	E17.5-6
Efnb1	7.93249e-13	0.668557	0.785	0.487	2.22094e-08	E17.5-6
Hs3st4	1.42053e-16	0.661165	0.492	0.133	3.97721e-12	E17.5-6
1500009L16Rik	5.70102e-13	0.646014	0.769	0.459	1.59617e-08	E17.5-6
Edil3	4.42782e-18	0.640544	0.569	0.17	1.2397e-13	E17.5-6
Arhgap36	9.77074e-21	0.636882	0.431	0.085	2.73561e-16	E17.5-6
Khdrbs2	6.94118e-13	0.634725	0.692	0.336	1.94339e-08	E17.5-6
Tmem47	2.8413e-11	0.617731	0.6	0.27	7.95508e-07	E17.5-6
Brinp3	2.24382e-18	0.617256	0.6	0.173	6.28225e-14	E17.5-6
Irs4	8.41385e-12	0.599891	0.708	0.372	2.35571e-07	E17.5-6
Pou2f2	1.72685e-12	0.599199	0.985	0.842	4.83483e-08	E17.5-6
Pcdh7	1.80318e-12	0.599022	0.738	0.383	5.04854e-08	E17.5-6
Nrp2	4.78978e-15	0.593859	0.8	0.387	1.34104e-10	E17.5-6
Sphkap	1.33949e-22	0.590086	0.462	0.088	3.75032e-18	E17.5-6
Pcdh10	1.30826e-07	0.578752	0.6	0.389	0.00366288	E17.5-6
App	4.75232e-13	0.577829	0.985	0.774	1.33055e-08	E17.5-6
Adcy1	3.10793e-18	0.549805	0.462	0.109	8.70158e-14	E17.5-6
Pcsk1n	4.87037e-20	0.544691	1	1	1.36361e-15	E17.5-6
Zrsr2	1.05358e-10	0.540717	0.769	0.486	2.9498e-06	E17.5-6
Cdh4	1.61222e-12	0.537824	0.477	0.164	4.51389e-08	E17.5-6
Pgrmc1	1.00388e-15	0.536166	1	0.993	2.81066e-11	E17.5-6
Ctxn2	1.32555e-09	0.523107	0.538	0.251	3.71128e-05	E17.5-6
Pdcd4	6.74297e-06	0.514997	0.585	0.385	0.18879	E17.5-6
Plcxd3	6.73392e-07	0.507244	0.538	0.326	0.0188536	E17.5-6
Dner	1.42862e-11	0.5025	0.877	0.638	3.99985e-07	E17.5-6
Shisa9	4.16862e-12	0.502022	0.523	0.194	1.16713e-07	E17.5-6
Htatsf1	8.00337e-07	0.50063	0.6	0.387	0.0224078	E17.5-6
Xpr1	5.80114e-11	0.49991	0.969	0.784	1.6242e-06	E17.5-6
Mum1l1	5.28181e-10	0.497003	0.369	0.119	1.4788e-05	E17.5-6
Gkap1	1.77414e-09	0.490911	0.815	0.558	4.96725e-05	E17.5-6
Tcf12	5.43614e-08	0.490204	0.615	0.355	0.00152201	E17.5-6
Tmem164	5.55503e-17	0.484165	0.492	0.129	1.5553e-12	E17.5-6
Unc5d	2.91969e-08	0.482407	0.708	0.433	0.000817454	E17.5-6
Tmem163	4.60052e-09	0.479724	0.462	0.19	0.000128805	E17.5-6
Zfhx3	3.72252e-11	0.47674	0.954	0.73	1.04223e-06	E17.5-6
Btg1	4.29285e-08	0.473019	0.954	0.742	0.00120191	E17.5-6
Olfm2	5.60422e-07	0.455299	0.4	0.179	0.0156907	E17.5-6
Pitpnc1	7.35369e-09	0.454338	0.692	0.416	0.000205889	E17.5-6
Frmpd3	1.82055e-09	0.437976	0.369	0.124	5.09716e-05	E17.5-6
Sema6d	3.35956e-12	0.433033	0.4	0.117	9.40609e-08	E17.5-6
Uqcc2	2.73606e-09	0.42752	0.969	0.838	7.66041e-05	E17.5-6
Crtac1	2.25822e-08	0.42638	0.415	0.167	0.000632258	E17.5-6
Lrrtm3	1.68635e-08	0.426103	0.569	0.291	0.000472145	E17.5-6
Trpc5	1.19276e-06	0.417909	0.354	0.141	0.033395	E17.5-6
Slc24a5	0.00017776	0.406482	0.815	0.677	1	E17.5-6
H1f0	2.27716e-05	0.401848	0.692	0.521	0.637559	E17.5-6
Selm	3.94547e-06	0.398831	0.508	0.274	0.110465	E17.5-6
Baiap2	3.41147e-11	0.397147	0.4	0.125	9.55144e-07	E17.5-6
Nav2	2.32945e-07	0.397049	0.615	0.354	0.006522	E17.5-6
Map2	1.73375e-08	0.39566	0.985	0.899	0.000485415	E17.5-6
Ntrk3	1.2179e-07	0.394443	0.615	0.345	0.00340989	E17.5-6
Cited2	7.38837e-07	0.389102	0.815	0.561	0.020686	E17.5-6
Erc2	1.46052e-07	0.387235	0.508	0.259	0.00408916	E17.5-6
H3f3b	2.82169e-17	0.38565	1	0.999	7.90016e-13	E17.5-6
Chgb	0.000261154	0.383042	0.769	0.662	1	E17.5-6
Fam155a	6.32885e-06	0.373756	0.631	0.439	0.177195	E17.5-6
Necab2	0.000107205	0.37193	0.585	0.416	1	E17.5-6
Atp2c1	0.000120793	0.370863	0.569	0.399	1	E17.5-6
Tspan12	1.92401e-07	0.369932	0.323	0.114	0.00538685	E17.5-6
Dclk1	7.13132e-06	0.362928	0.923	0.865	0.199663	E17.5-6
Tmem158	7.82003e-05	0.359419	0.631	0.45	1	E17.5-6
Kcnd2	1.28745e-06	0.35845	0.554	0.311	0.036046	E17.5-6
Ucp2	6.36487e-11	0.354985	0.754	0.351	1.78204e-06	E17.5-6
Ogfrl1	6.74418e-05	0.351709	0.477	0.303	1	E17.5-6
Nup62cl	7.18625e-08	0.350986	0.292	0.091	0.00201201	E17.5-6
Ntm	1.26097e-05	0.348222	0.785	0.614	0.353046	E17.5-6
Socs2	0.00220845	0.345634	0.477	0.341	1	E17.5-6
Erdr1	0.000338072	0.344675	0.708	0.528	1	E17.5-6
Myef2	0.00101392	0.336212	0.846	0.752	1	E17.5-6
Cib2	0.000153549	0.33324	0.692	0.573	1	E17.5-6
Msi2	0.000288781	0.317388	0.677	0.513	1	E17.5-6
Nptxr	0.0026944	0.316627	0.646	0.581	1	E17.5-6
Dlgap2	3.24237e-11	0.315848	0.262	0.056	9.07799e-07	E17.5-6
Prrc2c	0.000503841	0.315701	0.785	0.69	1	E17.5-6
Sorcs3	1.48896e-07	0.315481	0.338	0.124	0.00416879	E17.5-6
Nacad	9.59767e-05	0.313526	0.523	0.342	1	E17.5-6
Fam19a5	3.42452e-05	0.312736	0.415	0.229	0.958796	E17.5-6
Top1	3.80819e-05	0.310352	0.862	0.838	1	E17.5-6
Greb1	3.274e-15	0.309453	0.246	0.035	9.16655e-11	E17.5-6
Meg3	2.18927e-08	0.309365	1	0.989	0.000612953	E17.5-6
Per3	1.66661e-05	0.309165	0.277	0.11	0.466618	E17.5-6
Unc5a	4.92574e-07	0.300887	0.338	0.134	0.0137911	E17.5-6
Slc40a1	7.79922e-15	0.298865	0.215	0.027	2.18363e-10	E17.5-6
Camk2n1	0.000809599	0.298281	0.785	0.64	1	E17.5-6
C1qtnf4	0.00134226	0.296887	0.846	0.757	1	E17.5-6
Snhg6	1.04691e-05	0.294482	0.785	0.582	0.293114	E17.5-6
Hnrnpk	8.44655e-07	0.293546	1	0.986	0.0236486	E17.5-6
Adrbk2	0.000775655	0.292971	0.385	0.235	1	E17.5-6
Slc35b2	1.59489e-05	0.292043	0.308	0.133	0.446536	E17.5-6
Nrxn2	9.53779e-06	0.29191	0.954	0.888	0.267039	E17.5-6
Rap2c	0.00332857	0.291704	0.338	0.216	1	E17.5-6
Mcmbp	0.00270267	0.289601	0.523	0.411	1	E17.5-6
Cisd2	3.92286e-05	0.286201	0.815	0.658	1	E17.5-6
Kcnk13	5.85746e-08	0.283802	0.308	0.096	0.00163997	E17.5-6
Sox1	0.00119489	0.283285	0.554	0.388	1	E17.5-6
Nbr1	0.000111144	0.282372	0.4	0.235	1	E17.5-6
Diaph2	1.81281e-12	0.28022	0.262	0.049	5.0755e-08	E17.5-6
Chchd4	0.00102488	0.279916	0.692	0.596	1	E17.5-6
Clstn1	0.00292583	0.279817	0.6	0.485	1	E17.5-6
Dusp26	0.0005662	0.279186	0.908	0.779	1	E17.5-6
Stag1	0.000527956	0.278902	0.415	0.262	1	E17.5-6
Cables1	4.49049e-05	0.278125	0.262	0.106	1	E17.5-6
Hs2st1	0.00238043	0.277448	0.615	0.516	1	E17.5-6
Plekha6	2.1834e-05	0.277129	0.4	0.207	0.611307	E17.5-6
Pop5	4.93259e-05	0.276832	0.723	0.557	1	E17.5-6
Map7d2	0.00295935	0.275368	0.6	0.483	1	E17.5-6
B3gat2	8.82572e-07	0.273061	0.323	0.122	0.0247102	E17.5-6
Camk4	6.26281e-05	0.270907	0.385	0.195	1	E17.5-6
Prkce	1.06424e-05	0.270447	0.692	0.457	0.297967	E17.5-6
Xylt1	5.96184e-11	0.270231	0.215	0.039	1.6692e-06	E17.5-6
B2m	1.18266e-05	0.269788	0.169	0.047	0.33112	E17.5-6
Tspan7	0.00268663	0.269256	0.662	0.546	1	E17.5-6
Etnk2	4.46041e-05	0.268525	0.415	0.21	1	E17.5-6
Smc6	0.00165013	0.267179	0.646	0.547	1	E17.5-6
Zfp280d	0.00821663	0.265713	0.415	0.298	1	E17.5-6
Snrpn	9.49415e-07	0.265592	1	0.989	0.0265817	E17.5-6
6030419C18Rik	9.02992e-08	0.26522	0.262	0.076	0.0025282	E17.5-6
Gria1	0.00025942	0.26482	0.738	0.621	1	E17.5-6
Aes	3.41489e-05	0.264803	0.923	0.843	0.9561	E17.5-6
Rplp0	2.16252e-08	0.264255	1	1	0.000605462	E17.5-6
Tnik	0.00037433	0.261898	0.723	0.585	1	E17.5-6
Auts2	0.000992986	0.260096	0.708	0.559	1	E17.5-6
Ikzf4	0.000703856	0.259849	0.4	0.252	1	E17.5-6
Gng5	0.00185262	0.259561	0.862	0.793	1	E17.5-6
Fry	0.000483267	0.258239	0.6	0.431	1	E17.5-6
Med13l	0.00118702	0.257965	0.415	0.262	1	E17.5-6
RP23-316J6.4	3.85517e-09	0.257669	0.169	0.029	0.000107937	E17.5-6
Chd3	0.00063621	0.257181	0.692	0.565	1	E17.5-6
Anp32b	0.00106111	0.256892	0.831	0.731	1	E17.5-6
Tspan6	0.00363339	0.256224	0.708	0.636	1	E17.5-6
Diaph3	2.33062e-07	0.256192	0.308	0.106	0.00652526	E17.5-6
Gm11713	5.51405e-05	0.25584	0.231	0.088	1	E17.5-6
Ahi1	9.81791e-05	0.254989	1	0.961	1	E17.5-6
Plekhb1	1.88676e-08	0.251843	0.277	0.077	0.000528254	E17.5-6
Spint2	0.000658154	0.250662	0.785	0.637	1	E17.5-6
Prrg1	1.59911e-06	0.250097	0.215	0.062	0.0447719	E17.5-6
Serf1	2.24813e-05	0.250081	0.985	0.963	0.629432	E17.5-6
Tcf7l2	1.80111e-31	1.02509	0.75	0.166	5.04276e-27	E17.5-7
Cd24a	3.13628e-20	0.951706	1	0.757	8.78097e-16	E17.5-7
Dlx5	1.02304e-152	0.927962	0.75	0.007	2.86432e-148	E17.5-7
Nrxn3	1.61134e-13	0.82565	0.846	0.466	4.51144e-09	E17.5-7
Dlx6	1.14284e-82	0.799912	0.519	0.013	3.19973e-78	E17.5-7
Dlx2	1.65582e-76	0.742279	0.481	0.012	4.63597e-72	E17.5-7
Gad1	5.05946e-13	0.686133	0.635	0.257	1.41655e-08	E17.5-7
BC048546	1.98237e-21	0.655499	0.385	0.053	5.55024e-17	E17.5-7
Sox4	3.65845e-11	0.651433	0.942	0.935	1.02429e-06	E17.5-7
Hmx2	1.22187e-64	0.629557	0.365	0.006	3.42099e-60	E17.5-7
Pou2f2	3.96374e-14	0.618609	0.981	0.844	1.10977e-09	E17.5-7
Dlx1	8.04935e-60	0.597164	0.404	0.012	2.25366e-55	E17.5-7
Pik3r1	2.74183e-05	0.575247	0.712	0.641	0.767656	E17.5-7
Zfos1	1.94778e-07	0.558673	0.923	0.911	0.00545339	E17.5-7
Csrp2	2.25202e-06	0.556311	0.692	0.498	0.0630519	E17.5-7
Klf5	1.21263e-15	0.551822	0.481	0.119	3.39513e-11	E17.5-7
Pou6f2	5.18885e-15	0.524026	0.385	0.08	1.45278e-10	E17.5-7
Slc32a1	3.3937e-12	0.518686	0.442	0.122	9.50168e-08	E17.5-7
Asb4	3.3357e-08	0.504305	0.827	0.539	0.000933929	E17.5-7
Cited1	1.26262e-10	0.500041	0.942	0.689	3.53507e-06	E17.5-7
Kcnip1	3.03306e-09	0.497663	0.712	0.367	8.49196e-05	E17.5-7
Bub3	3.37106e-06	0.481839	0.731	0.503	0.094383	E17.5-7
Mef2c	5.8632e-08	0.475079	0.385	0.133	0.00164158	E17.5-7
H2afz	3.38674e-11	0.466947	1	0.984	9.48221e-07	E17.5-7
Vsnl1	4.72298e-07	0.448078	0.346	0.121	0.0132234	E17.5-7
Id4	0.00167623	0.430157	0.423	0.257	1	E17.5-7
Zdbf2	0.000554149	0.429496	0.885	0.807	1	E17.5-7
Barhl2	1.27661e-18	0.428444	0.154	0.007	3.57426e-14	E17.5-7
Adgrl2	5.65379e-09	0.421184	0.404	0.134	0.000158295	E17.5-7
Cks1b	1.36405e-06	0.414822	0.558	0.296	0.0381907	E17.5-7
Zfhx4	1.37187e-06	0.40084	0.596	0.35	0.0384095	E17.5-7
Gm42851	2.95935e-06	0.398564	0.385	0.161	0.082856	E17.5-7
Tekt1	2.55769e-11	0.397548	0.365	0.091	7.16101e-07	E17.5-7
Zfhx3	4.36384e-05	0.392108	0.865	0.737	1	E17.5-7
Slitrk4	1.05953e-13	0.386262	0.346	0.069	2.96647e-09	E17.5-7
Tmem57	6.22586e-07	0.385785	0.75	0.478	0.0174312	E17.5-7
Ecel1	9.33792e-06	0.372935	0.462	0.224	0.261443	E17.5-7
Cks2	2.86488e-14	0.370628	0.288	0.045	8.02109e-10	E17.5-7
Grm5	7.70772e-07	0.364922	0.462	0.202	0.0215801	E17.5-7
Nrep	5.20195e-05	0.351024	0.885	0.697	1	E17.5-7
Gab2	5.1605e-06	0.34723	0.385	0.169	0.144484	E17.5-7
Nrg1	9.42938e-09	0.346216	0.327	0.09	0.000264004	E17.5-7
Nt5dc2	0.00163311	0.34594	0.673	0.532	1	E17.5-7
Dlk1	0.00156401	0.329524	0.865	0.741	1	E17.5-7
Rgs4	0.000338451	0.327554	0.654	0.47	1	E17.5-7
Rbmxl1	0.000905523	0.326148	0.731	0.633	1	E17.5-7
Flywch2	0.000164761	0.326106	0.731	0.534	1	E17.5-7
Prdm4	0.000503938	0.323969	0.288	0.134	1	E17.5-7
Chd3os	6.14385e-06	0.322635	0.923	0.884	0.172015	E17.5-7
Zbtb38	0.00205941	0.320537	0.423	0.272	1	E17.5-7
Eef1d	0.00268165	0.314913	0.654	0.582	1	E17.5-7
Hjurp	8.39048e-05	0.311053	0.481	0.274	1	E17.5-7
Syt1	0.000772951	0.30504	0.788	0.601	1	E17.5-7
Mis18a	1.7816e-07	0.300284	0.385	0.136	0.00498812	E17.5-7
Nrsn1	0.00112345	0.291993	0.731	0.585	1	E17.5-7
Adgrb3	0.000174327	0.291767	0.654	0.417	1	E17.5-7
Snrpg	8.09751e-08	0.289855	1	0.977	0.00226714	E17.5-7
Ccnt1	0.00347531	0.287561	0.481	0.328	1	E17.5-7
Uchl3	0.00305642	0.28543	0.731	0.66	1	E17.5-7
Irf2bpl	0.000353099	0.283485	0.788	0.615	1	E17.5-7
Tsc22d1	0.000155926	0.280152	1	0.945	1	E17.5-7
Lsm3	0.00426586	0.27654	0.827	0.638	1	E17.5-7
Sesn3	0.00403479	0.27589	0.538	0.387	1	E17.5-7
Med25	0.00160408	0.273311	0.654	0.489	1	E17.5-7
Calb2	0.00910962	0.273113	0.462	0.315	1	E17.5-7
Hes6	0.00428856	0.270092	0.538	0.409	1	E17.5-7
Arf2	0.00374291	0.269118	0.558	0.397	1	E17.5-7
Pabpc1	7.492e-05	0.268291	1	0.876	1	E17.5-7
Lsm5	0.00184865	0.264197	0.865	0.739	1	E17.5-7
D430019H16Rik	0.000635866	0.263285	0.788	0.606	1	E17.5-7
Apc2	0.00955254	0.261489	0.596	0.472	1	E17.5-7
mt-Nd4l	0.000132235	0.260046	0.923	0.827	1	E17.5-7
Aard	8.43093e-09	0.259901	0.308	0.079	0.000236049	E17.5-7
Tmeff1	0.00107325	0.258787	0.885	0.754	1	E17.5-7
Grin2b	0.00754972	0.257199	0.558	0.434	1	E17.5-7
Cdk5r1	0.000382358	0.256988	0.904	0.804	1	E17.5-7
Dlx6os1	2.46902e-35	0.254144	0.212	0.005	6.91277e-31	E17.5-7
Gle1	0.000402858	0.254051	0.481	0.285	1	E17.5-7
Klhl7	0.00361966	0.253104	0.654	0.511	1	E17.5-7
Tnfrsf21	0.00328282	0.252066	0.423	0.272	1	E17.5-7
Macf1	0.00245357	0.251177	0.808	0.702	1	E17.5-7
Pak1	0.00327556	0.250869	0.712	0.566	1	E17.5-7
Tmsb15b2	0.000390574	0.250292	0.308	0.141	1	E17.5-7
Dctpp1	0.00435891	0.629395	0.64	0.597	1	E17.5-8
Uqcr11	1.05392e-06	0.571191	0.96	0.958	0.0295076	E17.5-8
Rps26	1.20031e-10	0.537441	1	0.994	3.36062e-06	E17.5-8
Pcp4	0.000357695	0.537297	0.92	0.798	1	E17.5-8
Rps27rt	2.34016e-05	0.520017	0.92	0.952	0.655198	E17.5-8
Rps15a	1.93078e-10	0.519709	1	0.996	5.4058e-06	E17.5-8
Rpl36al	1.01208e-05	0.513883	1	0.965	0.283362	E17.5-8
Rps15	4.2384e-09	0.513572	1	0.998	0.000118667	E17.5-8
Ndufb4	0.00906189	0.509538	0.72	0.822	1	E17.5-8
Rpl23a	3.99704e-08	0.496115	1	0.994	0.00111909	E17.5-8
Rpl36	5.33042e-10	0.495053	1	0.996	1.49241e-05	E17.5-8
Rpl38	5.52322e-11	0.494003	1	0.997	1.54639e-06	E17.5-8
Rpl23a-ps3	4.93178e-05	0.488897	0.92	0.947	1	E17.5-8
Rpl37	1.61978e-08	0.482416	1	0.999	0.000453507	E17.5-8
Rpl35	1.3004e-09	0.476775	1	0.992	3.64086e-05	E17.5-8
Rps28	3.73446e-08	0.475616	1	0.999	0.00104557	E17.5-8
Myl6	0.00102675	0.463856	0.96	0.958	1	E17.5-8
Rpl31	1.10225e-07	0.459065	1	0.993	0.00308608	E17.5-8
Rpl41	4.68943e-08	0.453428	1	1	0.00131295	E17.5-8
Ttr	0.0026116	0.453234	0.2	0.061	1	E17.5-8
Huwe1	0.00412807	0.448314	0.72	0.73	1	E17.5-8
Rpl39	3.46149e-06	0.447555	1	0.996	0.0969149	E17.5-8
Rps5	8.39849e-09	0.445027	1	1	0.000235141	E17.5-8
Shfm1	0.000112251	0.444696	0.92	0.971	1	E17.5-8
Rpl37a	1.34633e-07	0.44294	1	0.999	0.00376946	E17.5-8
Rps27	8.74333e-07	0.442402	1	0.997	0.0244796	E17.5-8
Rpl6	2.16511e-08	0.440893	1	0.999	0.000606187	E17.5-8
Rps17	2.1384e-08	0.438286	1	0.995	0.000598708	E17.5-8
Cox7a2	3.0445e-05	0.437703	1	0.988	0.852398	E17.5-8
Rpl18a	3.42465e-07	0.436708	1	1	0.00958833	E17.5-8
Rps8	2.88638e-09	0.435935	1	0.998	8.08129e-05	E17.5-8
Fxyd6	0.000424149	0.435073	0.92	0.991	1	E17.5-8
Atp5g2	0.00148351	0.433963	0.96	0.969	1	E17.5-8
Rpl22	0.00314423	0.430581	0.8	0.923	1	E17.5-8
Rps16	5.839e-08	0.430211	1	0.996	0.0016348	E17.5-8
Rpl24	1.78555e-10	0.43012	1	0.997	4.99919e-06	E17.5-8
Rps27a	3.70202e-08	0.429975	1	0.997	0.00103649	E17.5-8
Rps7	1.75045e-06	0.427918	1	0.996	0.0490092	E17.5-8
Gm10076	0.000697329	0.42219	0.88	0.941	1	E17.5-8
Wrb	0.00416511	0.421219	0.64	0.56	1	E17.5-8
Rps29	1.84185e-08	0.41947	1	0.998	0.000515681	E17.5-8
Rpl9-ps6	0.000440703	0.41757	1	0.943	1	E17.5-8
Rps14	3.54911e-07	0.417489	1	0.999	0.00993679	E17.5-8
Ap2s1	0.00861388	0.412812	0.8	0.904	1	E17.5-8
Psmb5	0.00744052	0.412083	0.76	0.813	1	E17.5-8
Rpl10a	1.37136e-07	0.411476	1	0.992	0.00383952	E17.5-8
Ppia	1.19652e-06	0.409855	1	0.998	0.0335002	E17.5-8
Atp5j2	7.69492e-05	0.404064	1	0.987	1	E17.5-8
Rps24	8.76735e-06	0.402177	1	0.994	0.245468	E17.5-8
Dio3	6.70965e-05	0.401773	0.16	0.027	1	E17.5-8
Rps21	4.61863e-06	0.399841	1	0.99	0.129312	E17.5-8
Rpl17	0.000299331	0.399424	1	0.992	1	E17.5-8
Snrpd3	0.00345046	0.395223	0.84	0.802	1	E17.5-8
Mrpl33	0.000726163	0.393162	0.84	0.828	1	E17.5-8
mt-Nd1	3.11842e-06	0.389253	1	1	0.0873095	E17.5-8
Sepw1	2.65977e-07	0.388613	1	0.995	0.00744684	E17.5-8
Rpl27a	0.000118956	0.387722	1	0.997	1	E17.5-8
Nenf	0.000885278	0.387123	0.84	0.907	1	E17.5-8
Evl	0.00153081	0.384073	0.92	0.954	1	E17.5-8
Rpl13	3.42191e-09	0.383657	1	1	9.58065e-05	E17.5-8
Rpl14	7.35955e-08	0.383491	1	0.996	0.00206053	E17.5-8
Ndufs5	0.0031819	0.383232	1	0.952	1	E17.5-8
mt-Atp6	2.21282e-06	0.381976	1	1	0.0619547	E17.5-8
Rpl13a	1.381e-05	0.381637	1	0.998	0.386652	E17.5-8
Timm8b	0.00331017	0.380346	0.88	0.918	1	E17.5-8
Rpl34	1.93318e-05	0.37983	1	0.996	0.541252	E17.5-8
mt-Co2	5.8879e-06	0.37945	1	1	0.16485	E17.5-8
Gm9493	0.00102527	0.379289	0.88	0.921	1	E17.5-8
Romo1	0.0059699	0.376727	0.92	0.96	1	E17.5-8
Tomm7	0.00286595	0.376602	0.84	0.941	1	E17.5-8
Rps18	5.3399e-06	0.374945	1	0.997	0.149507	E17.5-8
Myeov2	0.000896429	0.374374	0.88	0.966	1	E17.5-8
mt-Co3	4.35459e-06	0.374	1	1	0.12192	E17.5-8
Rpl32	1.96543e-05	0.372823	1	0.997	0.55028	E17.5-8
Usmg5	0.00292145	0.367077	1	0.991	1	E17.5-8
Rpl10	2.56684e-05	0.363677	1	0.998	0.718664	E17.5-8
Rps20	0.00144031	0.362863	1	0.993	1	E17.5-8
Vamp2	0.00211554	0.360153	0.88	0.86	1	E17.5-8
Ndufb5	0.00482265	0.352612	0.92	0.953	1	E17.5-8
Rps9	1.17647e-05	0.352602	1	0.994	0.329387	E17.5-8
Rps19	9.19336e-07	0.352024	1	0.998	0.0257396	E17.5-8
Rpl12	0.0020521	0.349663	1	0.97	1	E17.5-8
Eef1g	7.20596e-05	0.347629	1	0.996	1	E17.5-8
Gm1673	7.15963e-05	0.347089	1	0.996	1	E17.5-8
Rps6	4.22802e-06	0.346577	1	0.995	0.118376	E17.5-8
Eef1b2	0.00324001	0.346368	0.92	0.962	1	E17.5-8
Pomc	0.000163728	0.346022	1	1	1	E17.5-8
Fau	1.84842e-08	0.345604	1	0.998	0.000517522	E17.5-8
Rpl29	0.000334921	0.345013	1	0.994	1	E17.5-8
Ndufc1	0.00189842	0.344939	0.84	0.925	1	E17.5-8
Rps23	1.8494e-06	0.343344	1	0.998	0.0517796	E17.5-8
Rps4x	2.02309e-05	0.343009	1	0.996	0.566424	E17.5-8
Fkbp3	0.00227746	0.338823	0.84	0.831	1	E17.5-8
Rpl23	1.41624e-05	0.337338	1	0.998	0.39652	E17.5-8
Atp5g3	0.00887036	0.335713	0.92	0.951	1	E17.5-8
Tubb2a	0.00698059	0.33195	0.92	0.962	1	E17.5-8
Rpl9	1.7022e-05	0.329798	1	0.996	0.476581	E17.5-8
2010107E04Rik	0.00839692	0.328685	0.96	0.961	1	E17.5-8
Rpl15	0.000154696	0.326356	1	0.995	1	E17.5-8
Rps11	0.000140969	0.323632	1	0.995	1	E17.5-8
Ndufa3	0.000684097	0.32284	0.96	0.962	1	E17.5-8
Gm11808	0.00773063	0.322561	0.88	0.937	1	E17.5-8
[truncated: 552 more rows]

## Sheet: P5
Figure 4-Source Data 2 (corresponding to Figure4). Feature genes that define each
[truncated: 5,393 more rows]

[truncated: 1 more sheets: P12]
