# Supplementary material for: Developmental single-cell transcriptomics of hypothalamic POMC neurons reveal the genetic trajectories of multiple neuropeptidergic phenotypes
Source: eLife. 2022 Jan 19;11:e72883. doi: 10.7554/eLife.72883 (PMC8806186; doi:10.7554/eLife.72883)
Supplement: Figure 5—source data 1. [file elife-72883-fig5-data1.xlsx]

## Sheet: p12_final_combine_mean_stat
Figure 5-Source Data 1(corresponding to Figure 5).
Differentially expressed genes by RNA TRAP-seq between pull-down vs. supernatant at age P12. Raw reads were normalized to counts per million (CPM). DESeq2 with a mixed model of pair and treatment (pulldown vs. supernatant) was used for statistical analysis.
The data are ordered by log2FoldChange from greatest to lowest and presented as the means and individual results from three experimental replicates.
gene	baseMean	log2FoldChange	lfcSE	stat	pvalue	padj	Pull_Down_CPM_Mean	Supernatant_CPM_Mean	Pull_Down_CPM_1	Supernatant_CPM_1	Pull_Down_CPM_2	Supernatant_CPM_2	Pull_Down_CPM_3	Supernatant_CPM_3
Fndc7	10.3797	6.61829	3.37204	1.9627	0.0496816	0.209072	1.04722	0	2.23951	0	0	0	0.90214	0
4930407I10Rik	19.1446	5.95608	2.64272	2.25377	0.0242106	0.133995	1.93152	0	5.51264	0	0	0	0.281919	0
A130040M12Rik	27131.5	5.92379	0.543806	10.8932	1.24205e-27	1.65104e-25	2698.57	38.7474	3069.85	35.059	1009.48	37.4067	4016.38	43.7764
Vmn1r212	12.5018	5.76803	3.14145	1.8361	0.0663424	0.248855	1.26132	0	0.34454	0	0	0	3.43941	0
Sspo	44.2256	5.76166	1.43804	4.00661	6.15964e-05	0.00116377	4.36187	0.100089	8.95805	0.034575	1.75945	0.240988	2.36812	0.0247045
Arid1b	54883.7	5.48135	0.13848	39.5821	0	0	5416.71	120.558	5558.47	125.3	4448.46	130.589	6243.2	105.785
Yeats2	12522.4	4.86826	0.169549	28.713	2.62332e-181	4.882e-178	1222.41	40.9919	904.418	43.6682	1545.93	37.1121	1216.87	42.1953
Olfr1033	195.794	4.85525	0.674301	7.20042	6.00255e-13	3.43715e-11	19.1358	0.618008	8.95805	0.760649	17.7202	0.401646	30.7291	0.691727
Avpr1b	575.093	4.84627	0.371442	13.0472	6.59353e-39	1.25852e-36	56.0825	1.93919	57.1937	1.7979	63.4659	2.14211	47.5879	1.87754
Tgm7	12.0899	4.68297	2.6181	1.78869	0.0736643	0.26376	1.19436	0.0253952	0	0	1.94796	0.0267764	1.63513	0.0494091
1700020D05Rik	48.4327	4.66687	1.72268	2.70908	0.00674709	0.0554451	4.73807	0.148352	9.64713	0.311175	0	0.133882	4.56708	0
Gsdma	10.6592	4.63025	3.02652	1.52989	0.126043	0.356417	1.05895	0.0164697	0	0	0.188513	0	2.98834	0.0494091
Uroc1	21.8996	4.62859	2.05522	2.25211	0.024315	0.134373	2.14768	0.0617877	0	0	5.08984	0.160659	1.35321	0.0247045
Pnliprp1	33.5197	4.46389	1.71426	2.60397	0.00921497	0.0693592	3.32186	0.0599701	8.26897	0.103725	1.69661	0.0267764	0	0.0494091
Tnrc18	61528.4	4.30559	0.167038	25.7761	1.64195e-146	2.44453e-143	5925.42	282.232	3620.77	278.882	8538.36	285.196	5617.12	282.62
7530416G11Rik	31.7473	4.24586	1.41821	2.99381	0.00275513	0.0279095	3.04217	0.160841	5.1681	0.2766	1.75945	0.107106	2.19897	0.0988181
Syne1	73478.5	4.1765	0.140151	29.7999	3.91605e-195	8.32889e-192	7038.12	375.185	5693.18	372.096	5573.88	364.24	9847.31	389.22
Mlph	668.375	4.16683	0.362986	11.4793	1.67622e-30	2.42288e-28	64.005	3.42797	88.7191	3.4575	46.1227	3.61482	57.1731	3.21159
Olfr561	60.9004	4.08576	2.00806	2.03468	0.0418833	0.189523	6.1443	0	18.4329	0	0	0	0	0
Bahcc1	12351.1	4.06057	0.535617	7.5811	3.42628e-14	2.09059e-12	1185.85	60.271	526.63	57.8785	2100.97	60.0863	929.937	62.8483
Prl	37.1313	4.05043	2.11068	1.91902	0.0549823	0.222742	3.72836	0.017851	0	0	11.1851	0.0535529	0	0
Oasl1	10.263	4.04308	2.94749	1.3717	0.170156	0.420597	0.92632	0.109125	0.51681	0	2.26215	0.0803293	0	0.247045
Hoxb8	57.4855	4.02244	2.04179	1.97006	0.0488315	0.207123	5.79976	0	17.3993	0	0	0	0	0
Spink5	23.2858	3.84546	2.74792	1.39941	0.161691	0.408853	2.34932	0	0	0	0	0	7.04797	0
Spna2	147935	3.80134	0.115729	32.8468	1.26528e-236	6.27917e-233	13935.2	990.149	11835.1	968.653	13403.9	1031.05	16566.5	970.74
Plec	31472.4	3.79969	0.110326	34.4405	6.2583e-260	4.65868e-256	2964.26	211.019	2359.24	188.814	3120.01	217.505	3413.53	226.738
Vmn2r118	44.3947	3.76741	2.20654	1.70738	0.0877514	0.289741	4.47902	0	13.4371	0	0	0	0	0
Cchcr1	124.818	3.74307	0.84393	4.43528	9.19529e-06	0.00020711	11.8516	0.741454	23.7733	0.968099	3.26755	0.910399	8.51395	0.345863
Pmp2	20.2243	3.74235	2.18081	1.71604	0.0861546	0.286894	1.99789	0.0425555	0	0	5.65538	0.0535529	0.338303	0.0741136
Ucn	19.0012	3.73708	2.96284	1.26132	0.207194	0.463609	1.91705	0	0	0	0	0	5.75114	0
Bcor	4358.19	3.65367	0.256287	14.2562	4.10458e-46	1.00179e-43	409.617	30.0848	200.006	32.7771	470.025	29.5612	558.819	27.9161
Ank2	51456.4	3.65057	0.121931	29.9398	5.98026e-197	1.78068e-193	4814.52	376.964	3664.87	361.516	4918.54	367.855	5860.13	401.523
Spnb2	113696	3.63362	0.117086	31.0337	1.89534e-211	7.05444e-208	10629.2	841.678	8149.75	791.767	10654.9	848.893	13082.8	884.373
Ccnb3	14.7166	3.62436	3.26943	1.10856	0.26762	0.531117	1.48477	0	0	0	0	0	4.45432	0
Olfr419	13.7852	3.59926	3.35485	1.07285	0.283337	0.546486	1.3908	0	0	0	0	0	4.1724	0
Klk5	13.2263	3.58393	3.41114	1.05065	0.293417	0.556138	1.33442	0	0	0	0	0	4.00325	0
Mapk8ip2	12581.9	3.57432	0.119871	29.818	2.28077e-195	5.65935e-192	1171.14	98.2538	1092.36	95.1849	1196.8	102.018	1224.26	97.5582
Aim1l	38.5584	3.56345	1.30041	2.74025	0.0061392	0.0519616	3.62395	0.26624	6.54626	0.34575	0.942563	0.107106	3.38303	0.345863
Adamtsl5	18.887	3.55401	2.35795	1.50725	0.131748	0.364597	1.807	0.0985259	0	0.242025	0.628375	0.0535529	4.79262	0
Fam187b	36.7408	3.54533	1.33475	2.65619	0.00790302	0.0622212	3.4124	0.294416	2.23951	0.172875	5.40403	0.240988	2.59365	0.469386
LOC629393	11.5497	3.538	3.60187	0.982268	0.325968	0.585335	1.16526	0	0	0	0	0	3.49579	0
Olfr168	11.5497	3.538	3.60187	0.982268	0.325968	0.585335	1.16526	0	0	0	0	0	3.49579	0
Tprn	1222.5	3.53619	0.279236	12.6638	9.38352e-37	1.70368e-34	113.608	9.73052	129.375	9.43897	91.2401	11.0319	120.21	8.7207
Tcf23	9.0873	3.52948	3.02365	1.16729	0.243092	0.505138	0.848875	0.0679506	0.51681	0	0	0.0803293	2.02982	0.123523
4932416K20Rik	11.1772	3.52778	3.6501	0.966489	0.3338	0.591972	1.12768	0	0	0	0	0	3.38303	0
Olfr730	11.1772	3.52778	3.6501	0.966489	0.3338	0.591972	1.12768	0	0	0	0	0	3.38303	0
Ceacam14	10.8046	3.51747	3.70085	0.950451	0.341883	0.59952	1.09009	0	0	0	0	0	3.27026	0
Cd14	23.3754	3.50266	2.19434	1.59622	0.110439	0.331029	2.13194	0.226428	0	0.518625	1.88513	0.160659	4.5107	0
Lif	11.1287	3.4909	2.58808	1.34884	0.177388	0.428656	1.06611	0.05668	2.06724	0.06915	1.13108	0.0267764	0	0.0741136
Lyzl1	8.94174	3.47084	3.9598	0.87652	0.380747	0.632511	0.90214	0	0	0	0	0	2.70642	0
Rhox4f	8.94174	3.47084	3.9598	0.87652	0.380747	0.632511	0.90214	0	0	0	0	0	2.70642	0
Tnks1bp1	6899.87	3.45366	0.161791	21.3464	4.2094e-101	2.84862e-98	638.674	57.4608	566.424	56.8758	550.582	59.5508	799.014	55.9558
Gfi1	29.0273	3.42734	2.53786	1.35049	0.17686	0.428208	2.92859	0	8.78578	0	0	0	0	0
Myh9	7622.2	3.42165	0.146046	23.4286	2.18658e-121	2.17026e-118	704.238	64.7735	528.008	59.1924	800.801	67.9318	783.903	67.1963
Aqp1	14.3928	3.35959	2.33339	1.43979	0.149927	0.39168	1.37099	0.0811112	0	0.1383	1.06824	0.0803293	3.04472	0.0247045
Hoxd10	26.1815	3.35914	2.63109	1.27671	0.201705	0.458612	2.64147	0	7.92442	0	0	0	0	0
Tnfsf11	17.5695	3.34194	2.73072	1.22383	0.221016	0.481257	1.7479	0.0247045	0	0	0	0	5.24369	0.0741136
Gse1	10918.3	3.33725	0.15177	21.9888	3.68527e-107	3.04813e-104	1003.5	98.0548	820.006	103.448	1225.77	94.4672	964.726	96.2489
Dsp	156.904	3.3339	0.675392	4.93625	7.96383e-07	2.22449e-05	14.3718	1.45844	15.1598	1.21012	13.0702	1.95468	14.8853	1.21052
Ttn	2176.35	3.32141	0.22443	14.7993	1.48059e-49	3.97531e-47	199.895	19.679	234.115	17.8061	148.548	19.1451	217.021	22.0859
Olfr1356	24.474	3.31733	2.69508	1.23088	0.218367	0.478589	2.4692	0	7.40761	0	0	0	0	0
Ereg	15.334	3.24889	2.87904	1.12846	0.259125	0.523328	1.52236	0.0247045	0	0	0	0	4.56708	0.0741136
Myoz3	671.531	3.2123	0.540275	5.94568	2.75311e-09	1.07019e-07	63.8386	3.91277	149.186	3.38835	11.9391	3.82903	30.3908	4.52093
Cxcl9	19.5578	3.20683	1.73802	1.8451	0.0650223	0.245761	1.78626	0.186946	1.7227	0.103725	0.816888	0.160659	2.81919	0.296454
Txndc2	17.7654	3.18291	2.08215	1.52867	0.126347	0.356666	1.68846	0.103907	0	0.103725	3.20471	0.133882	1.86066	0.0741136
Cgn	1775.16	3.16188	0.221211	14.2935	2.4012e-46	6.16363e-44	161.069	18.0293	162.968	16.3194	159.544	19.4129	160.694	18.3555
Svil	1089.82	3.14646	0.305997	10.2826	8.43833e-25	9.81483e-23	99.3178	10.6346	63.2231	10.5108	91.1772	10.5231	143.553	10.87
Crocc	3809.46	3.1275	0.20927	14.9448	1.68273e-50	4.72687e-48	346.17	38.1704	432.053	39.6229	222.256	38.7455	384.199	36.1427
Oas1d	38.0169	3.10142	1.69638	1.82825	0.0675117	0.251295	3.56265	0.272911	3.27313	0.06915	7.41483	0.428423	0	0.321159
Ifnz	15.9366	3.09837	3.16313	0.979525	0.327321	0.58679	1.60785	0	4.82356	0	0	0	0	0
Atg7	1426.72	3.08327	0.262726	11.7357	8.36187e-32	1.27032e-29	128.956	14.9863	95.9544	15.8699	156.214	15.4768	134.701	13.6122
Spink14	15.3674	3.08309	3.20828	0.96098	0.336562	0.59444	1.55043	0	4.65129	0	0	0	0	0
Irf4	26.4539	3.06281	1.52708	2.00566	0.0448923	0.196807	2.32695	0.342008	2.23951	0.2766	1.69661	0.107106	3.04472	0.642318
Pabpc6	14.2291	3.05225	3.30701	0.922964	0.356026	0.611405	1.43558	0	4.30675	0	0	0	0	0
1700001K19Rik	47.1948	3.04311	1.22391	2.48638	0.012905	0.0873319	4.36276	0.398759	1.20589	0.172875	9.73982	0.455199	2.14258	0.568204
Macf1	52668.5	3.03435	0.110605	27.4342	1.07368e-165	1.77611e-162	4738.35	575.421	3962.9	559.285	4507.27	502.031	5744.88	664.947
Plac8l1	11.9524	2.98945	3.54712	0.842781	0.399351	0.646957	1.20589	0	3.61767	0	0	0	0	0
Dpcr1	64.0776	2.97366	1.00711	2.95268	0.00315028	0.0310605	5.76242	0.702428	6.20172	0.760649	3.07904	0.481976	8.00649	0.864659
Fbxw16	11.3833	2.97359	3.61819	0.821846	0.411164	0.655875	1.14847	0	3.4454	0	0	0	0	0
Myh14	2627.06	2.95482	0.196007	15.075	2.36362e-51	7.03792e-49	234.902	30.1445	198.283	29.3887	263.352	28.7311	243.07	32.3135
4933417E11Rik	10.2449	2.94161	3.77803	0.778611	0.436209	0.676136	1.03362	0	3.10086	0	0	0	0	0
Dst	55721.7	2.93981	0.11927	24.6483	3.83685e-134	4.76025e-131	4983.9	637.909	3745.32	598.527	4875	590.715	6331.39	724.485
Plcb2	132.946	2.92364	0.877701	3.33103	0.000865261	0.0113398	12.5188	0.894262	29.1136	1.34842	7.5405	0.642634	0.90214	0.691727
Gnrhr	9.10661	2.91	3.96236	0.734411	0.462698	0.696386	0.918774	0	2.75632	0	0	0	0	0
Pold1	192.051	2.90903	0.608979	4.7769	1.78017e-06	4.69082e-05	17.0314	2.34478	18.9497	2.66227	16.5263	2.86508	15.6183	1.50698
Dync1h1	53314	2.90056	0.376266	7.70881	1.27e-14	7.97797e-13	4799.85	579.041	3095.69	518.037	8070.6	631.094	3233.27	587.993
Spnb3	17270.3	2.8878	0.133816	21.5804	2.74623e-103	2.15189e-100	1538.53	203.883	1286.51	203.163	1331.34	191.853	1997.73	216.634
4921513I03Rik	11.7716	2.87693	3.18769	0.902513	0.366785	0.619056	1.14647	0.0411742	0	0	0	0	3.43941	0.123523
Tnfsf15	34.0065	2.87071	1.47235	1.94974	0.0512069	0.212952	3.18716	0.243789	7.57988	0.1383	0.628375	0.321317	1.35321	0.27175
Lyg2	12.276	2.85277	3.13273	0.910631	0.36249	0.616701	1.19391	0.0446274	0	0	3.58174	0.133882	0	0
Sema3g	74.78	2.85236	1.04445	2.73096	0.00631493	0.0530568	6.77059	0.774033	13.2648	0.380325	3.83309	0.830069	3.21387	1.1117
Shroom3	851.378	2.83736	0.348484	8.14201	3.88771e-16	2.74314e-14	75.9461	9.95021	39.7944	9.85387	86.7786	9.39853	101.265	10.5982
Aoah	45.3599	2.83103	1.4854	1.9059	0.0566629	0.227166	4.37161	0.204797	10.853	0.103725	0.0628375	0.214211	2.19897	0.296454
Amot	973.126	2.8151	0.309772	9.08765	1.01205e-19	8.91559e-18	86.193	11.9865	61.1559	12.8965	89.1664	11.0319	108.257	12.0311
Ppp1r9a	24398.6	2.80669	0.118657	23.6538	1.07762e-123	1.14597e-120	2154.13	307.467	2132.19	305.574	1987.11	324.771	2343.08	292.057
Txndc6	29.6743	2.74936	1.8153	1.51455	0.129887	0.361587	2.72148	0.272384	0	0.518625	0.439863	0.0267764	7.72458	0.27175
Ccbp2	14.7992	2.74376	2.3254	1.17991	0.238038	0.500066	1.3145	0.178601	2.92859	0.1383	0	0.348094	1.01491	0.0494091
Pdxk-ps	37.7594	2.74202	1.34045	2.04559	0.0407964	0.18668	3.44543	0.364147	7.75215	0.4149	1.0054	0.455199	1.57875	0.222341
Cdrt4	13.4392	2.73858	2.61823	1.04597	0.295577	0.558375	1.24815	0.107744	0	0	3.5189	0.0267764	0.225535	0.296454
Gcm1	55.3268	2.72271	1.12213	2.42638	0.0152505	0.098247	4.95678	0.625187	6.54626	0.6915	1.44526	0.615858	6.87882	0.568204
Fgfr4	14.7599	2.70452	2.24313	1.20569	0.227937	0.48954	1.38333	0.105816	0	0.1383	0.879725	0.0803293	3.27026	0.0988181
Hist1h2bh	8.80683	2.704	2.78813	0.969827	0.332133	0.590675	0.760172	0.128357	1.03362	0	0.0628375	0.187435	1.18406	0.197636
Ehd2	259.401	2.68854	0.546317	4.92121	8.60123e-07	2.38021e-05	22.7494	3.42173	28.5968	3.14632	14.9553	3.88258	24.6961	3.23629
Myoc	47.4485	2.68747	1.16856	2.29982	0.0214585	0.124246	4.18087	0.606247	1.7227	0.449475	4.33579	0.455199	6.48413	0.914068
Actn4	3780	2.68421	0.164624	16.3051	9.07209e-60	3.29428e-57	330.021	51.3466	333.687	49.5114	320.723	53.0441	335.653	51.4842
6030408B16Rik	13.5499	2.67908	2.29518	1.16727	0.243103	0.505138	1.2615	0.105561	0	0.034575	2.26215	0.133882	1.52236	0.148227
Gdf5	49.1294	2.674	1.48342	1.80259	0.0714531	0.259033	4.6317	0.32501	4.47902	0.242025	0	0.214211	9.41609	0.518795
Myh13	129.004	2.66679	0.835299	3.19262	0.00140988	0.0167387	11.7611	1.25423	26.0128	1.1064	5.71821	1.12461	3.55218	1.53168
Dnttip2	2060.39	2.65859	0.208315	12.7624	2.66046e-37	4.88999e-35	179.822	28.0526	152.976	24.7903	240.793	34.1935	145.696	25.1739
Prpf8	14137.8	2.63702	0.137168	19.2248	2.29729e-82	1.36808e-79	1232.56	193.81	1169.02	194.623	1592.24	207.303	936.421	179.503
Snord100	12.5552	2.62945	2.513	1.04634	0.295404	0.558332	1.08963	0.177076	0	0	1.63378	0.160659	1.63513	0.370568
Myo18a	18449.5	2.62858	0.112591	23.3463	1.50141e-120	1.39706e-117	1602.8	258.592	1394.7	237.841	1712.2	278.02	1701.49	259.916
Supt6h	14091.3	2.62701	0.122008	21.5314	7.91456e-103	5.61105e-100	1224.73	196.948	1169.89	201.987	1450.16	209.526	1054.15	179.33
Mprip	17444.4	2.62305	0.138639	18.92	7.81154e-80	4.30734e-77	1517.58	242.404	1153.52	239.881	1609.21	246.29	1790.02	241.042
Ank3	16877.8	2.62191	0.125237	20.9355	2.54544e-97	1.64767e-94	1467.47	235.349	1220.71	228.368	1349.56	220.852	1832.13	256.828
Cenpe	305.213	2.60302	0.575077	4.52638	6.00022e-06	0.000141347	27.1057	3.68748	16.3657	4.11442	13.6986	3.90936	51.2528	3.03866
Usp18	68.4865	2.59891	1.43125	1.81583	0.069397	0.255233	6.52339	0.386271	15.8488	0.20745	0	0.481976	3.72133	0.469386
Snrnp200	9003.59	2.59182	0.151616	17.0946	1.62681e-65	6.54593e-63	781.423	126.957	943.868	125.231	836.619	139.184	563.781	116.457
Myh10	32801.2	2.57012	0.107551	23.8968	3.30279e-126	3.78246e-123	2833.77	475.58	2507.39	462.371	3101.53	493.329	2892.37	471.041
Limch1	5753.45	2.56045	0.14688	17.4322	4.6972e-68	2.11915e-65	496.58	83.8906	453.587	82.5305	478.068	83.1944	558.086	85.9471
Akap2	11343.1	2.54093	0.140744	18.0535	7.40218e-73	3.55496e-70	977.762	166.656	943.179	165.13	839.823	172.949	1150.29	161.889
Prr12	12145.9	2.53516	0.17942	14.1298	2.48896e-45	5.78995e-43	1049.8	175.607	688.391	188.33	1207.05	167.487	1253.97	171.005
Apbb1ip	281.419	2.53331	0.523181	4.84213	1.28456e-06	3.46459e-05	24.2469	4.14568	22.3951	3.8724	19.1654	5.00719	31.1802	3.55745
Bag3	662.753	2.50806	0.429009	5.84617	5.03024e-09	1.89117e-07	58.2335	8.63218	111.114	8.67832	30.6019	10.8445	32.9845	6.37377
Flnc	172.697	2.50646	0.692176	3.62113	0.000293324	0.004568	15.2925	2.13108	6.8908	1.86705	8.48306	2.30277	30.5036	2.22341
Capn3	84.4863	2.49061	0.976084	2.55164	0.0107218	0.077077	7.7755	0.748399	19.6388	1.1064	1.31959	0.669411	2.36812	0.469386
Mical3	3409.03	2.4882	0.203479	12.2283	2.19501e-34	3.63104e-32	293.137	50.8026	200.522	50.0991	315.947	52.455	362.942	49.8537
Actn1	2847.23	2.48672	0.19052	13.0523	6.1677e-39	1.19253e-36	243.913	43.3458	262.195	46.0884	208.432	43.7795	261.113	40.1696
Hydin	301.232	2.48336	0.500913	4.95766	7.13456e-07	2.00793e-05	25.9685	4.42312	16.7102	4.32187	37.514	4.84653	23.6812	4.10095
Hectd1	10765.4	2.47738	0.136553	18.1422	1.479e-73	7.33978e-71	923.041	163.088	879.783	156.106	1161.43	179.027	727.914	154.132
Myo6	3308.61	2.46953	0.178152	13.8619	1.07756e-43	2.32504e-41	282.972	50.837	322.317	54.421	283.02	47.0997	243.578	50.9902
Gprasp1	63647.6	2.45605	0.10552	23.2757	7.81899e-120	6.8476e-117	5439.19	982.273	4392.03	897.739	6629.86	1122.39	5295.68	926.692
Cd86	10.147	2.45373	2.74166	0.894981	0.370797	0.622515	0.869987	0.153752	0	0	1.25675	0.214211	1.35321	0.247045
BC027072	9.30496	2.44822	3.65848	0.669192	0.503373	0.727312	0.920935	0.017851	0	0	0	0.0535529	2.7628	0
Pdia2	8.55981	2.43623	3.77848	0.644765	0.519079	0.739739	0.845756	0.017851	0	0	0	0.0535529	2.53727	0
Peg3	106040	2.42863	0.0980737	24.7633	2.22955e-135	3.0176e-132	9024.37	1674.06	8452.95	1674.74	10353	1854.7	8267.1	1492.75
Syne2	1520.88	2.42478	0.2395	10.1243	4.30891e-24	4.68256e-22	129.365	24.0788	119.728	26.1387	124.418	23.2955	143.948	22.8023
Mn1	2257	2.41488	0.197176	12.2473	1.73591e-34	2.93684e-32	191.75	35.9612	188.119	36.6149	208.055	38.2635	179.075	33.0053
H2-Eb2	15.7405	2.41185	2.14785	1.12292	0.261472	0.524761	1.443	0.145081	0	0.103725	2.07364	0.133882	2.25535	0.197636
Ubr4	24623.1	2.41074	0.145213	16.6015	6.80074e-62	2.53124e-59	2097.4	386.844	1935.11	389.556	2678.83	370.639	1678.26	400.337
Cd300lf	165.895	2.41021	0.653798	3.68647	0.000227388	0.00364409	14.3181	2.41921	5.85718	1.21012	9.29995	2.16889	27.7972	3.87861
Prkag3	117.329	2.40065	0.901897	2.66178	0.00777284	0.0614562	10.7802	1.05725	26.7019	0.933524	2.19931	0.830069	3.43941	1.40816
Flna	1620.59	2.39703	0.227255	10.5478	5.20076e-26	6.34663e-24	137.282	26.2214	119.039	23.3727	129.068	22.3851	163.738	32.9064
E2f7	101.858	2.3881	0.862165	2.76989	0.00560755	0.0483264	8.63412	1.64241	9.8194	0.864374	4.5243	2.06178	11.5587	2.00107
Unc13a	9188.03	2.38737	0.128637	18.559	6.89851e-77	3.66804e-74	778.44	148.548	717.16	147.359	847.113	154.902	771.048	143.385
Mki67	401.459	2.38524	0.433199	5.50612	3.66832e-08	1.24405e-06	34.0209	6.48273	38.933	6.32722	34.9377	5.78371	28.1919	7.33725
Ly6c2	14.7331	2.38361	3.09281	0.770693	0.440889	0.679919	1.44526	0.0411742	0	0	4.33579	0	0	0.123523
6030407O03Rik	18.9758	2.36452	2.00338	1.18027	0.237894	0.500066	1.75979	0.154697	0	0.103725	1.44526	0.187435	3.8341	0.172932
Vwa5b1	2212.51	2.36347	0.204521	11.5561	6.87348e-31	1.01319e-28	187.205	36.0174	225.157	37.7904	157.722	33.2295	178.737	37.0321
Arhgap21	10919.4	2.36142	0.167045	14.1365	2.26385e-45	5.34988e-43	926.554	175.116	658.589	178.753	913.783	175.493	1207.29	171.104
Prpf6	4083.56	2.35937	0.192151	12.2788	1.17797e-34	2.01582e-32	345.579	66.4147	429.986	59.7456	333.29	75.5631	273.461	63.9353
Bmp8a	13.2986	2.35711	2.91943	0.807386	0.419444	0.662566	1.31562	0.0260858	0	0	0	0.0535529	3.94686	0.0247045
D030018L15Rik	15.7629	2.35596	1.93586	1.21701	0.2236	0.484374	1.27937	0.310958	1.7227	0.48405	1.38243	0.0535529	0.732989	0.395273
Itpr3	171.988	2.34422	1.12154	2.09018	0.0366013	0.173818	15.8485	1.50353	27.5632	1.41757	19.9823	1.66014	0	1.43286
Hic2	670.035	2.33347	0.356653	6.54269	6.04233e-11	2.84678e-09	56.6978	10.9027	45.307	10.6145	46.7511	11.5942	78.0351	10.4994
Actn2	526.527	2.33221	0.426952	5.46246	4.69573e-08	1.58526e-06	44.8091	8.31264	22.3951	8.47087	57.622	7.20286	54.4103	9.2642
Hcst	16.5074	2.32165	2.95552	0.785529	0.432144	0.672565	1.65392	0.011525	0	0.034575	0	0	4.96177	0
Cks1b	98.235	2.31577	0.876687	2.6415	0.0082539	0.0641357	8.37824	1.53277	13.6093	1.6596	3.5189	1.90113	8.00649	1.03759
Loxhd1	10.709	2.30988	2.53043	0.912842	0.361326	0.616201	0.981737	0.0987079	0	0.034575	2.32499	0.187435	0.620221	0.0741136
Fez1	13626.4	2.30723	0.161491	14.287	2.6354e-46	6.65015e-44	1146.43	228.354	1273.42	216.716	859.177	250.922	1306.69	217.425
Fam78a	78.362	2.29513	0.991863	2.31396	0.0206701	0.121204	6.89717	1.00884	10.5085	1.5213	0.879725	0.615858	9.30332	0.889363
Ylpm1	13186.4	2.29099	0.117054	19.5721	2.6731e-85	1.65822e-82	1104.83	225.56	1049.3	213.812	1221.25	244.951	1043.95	217.919
Tnni3k	19.2355	2.28439	2.02631	1.12737	0.259588	0.523674	1.81252	0.128175	4.47902	0.20745	0	0.0535529	0.958524	0.123523
Cspg4	763.219	2.27755	0.374814	6.07647	1.2286e-09	5.12365e-08	64.4692	12.5327	71.4921	9.85387	87.9725	14.3789	33.943	13.3652
Atp6v0a4	12.7878	2.27609	2.69804	0.84361	0.398887	0.646665	1.14327	0.146899	2.58405	0	0	0.267764	0.845756	0.172932
Prrc2c	28102.4	2.2696	0.105302	21.5532	4.94376e-103	3.68013e-100	2348.86	486.423	2201.61	456.943	2607.32	521.873	2237.65	480.454
Ranbp2	5986.72	2.25954	0.15639	14.4481	2.57753e-47	6.73232e-45	500.814	103.191	518.878	105.661	590.233	105.044	393.333	98.8675
C6	10.6026	2.25314	2.23682	1.00729	0.313794	0.575836	0.881545	0.188164	1.03362	0.1383	0.314188	0.0803293	1.29683	0.345863
Gprasp2	17372.5	2.253	0.118218	19.0579	5.64703e-81	3.23357e-78	1447.14	305.587	1448.27	279.642	1548.63	362.874	1344.53	274.245
Ncor2	17477.9	2.22019	0.138962	15.977	1.84929e-57	6.40283e-55	1455.56	307.802	1211.23	319.853	1819.65	307.42	1335.79	296.133
Zan	147.726	2.2113	0.678072	3.26116	0.00110958	0.0139287	12.1824	2.7218	14.4707	3.90697	10.1797	2.03501	11.897	2.22341
Dbn1	10210	2.20778	0.142123	15.5343	2.03425e-54	6.44383e-52	849.585	180.516	635.16	166.859	864.519	184.463	1049.08	190.225
Arhgap23	6489.61	2.19965	0.138784	15.8494	1.41946e-56	4.69619e-54	537.77	116.973	554.021	115.757	506.785	115.246	552.504	119.916
Mpdz	1876.15	2.1979	0.216426	10.1554	3.1341e-24	3.45633e-22	155.455	33.831	159.005	33.8835	164.823	32.4798	142.538	35.1298
Sf3b1	7170.4	2.19181	0.215261	10.1821	2.38342e-24	2.75073e-22	601.353	122.076	452.898	128.619	941.306	113.987	409.854	123.621
Mylk	424.807	2.19084	0.418102	5.23997	1.60601e-07	5.01264e-06	35.2864	7.57276	25.6682	7.1916	44.0491	8.14003	36.142	7.38665
Capn6	218.379	2.18418	0.616516	3.54278	0.000395931	0.00588286	18.7618	3.27067	37.2103	3.80325	7.85469	2.94541	11.2204	3.06336
Trio	13419.6	2.18396	0.125857	17.3527	1.8805e-67	7.9991e-65	1111.47	242.441	1107.35	232.793	1311.1	263.319	915.954	231.21
Myb	136.46	2.17681	0.742003	2.93369	0.00334957	0.03253	11.6492	2.11835	12.748	2.59312	3.14188	1.3656	19.0577	2.39634
4933425H06Rik	9.6846	2.16804	2.94059	0.737282	0.460951	0.69525	0.937568	0.0395197	2.75632	0.06915	0	0	0.0563838	0.0494091
Polr2a	6609.65	2.16706	0.183985	11.7785	5.03893e-32	7.81454e-30	549.175	117.678	497.344	124.954	759.894	114.71	390.288	113.369
Fn1	712.808	2.16613	0.388867	5.57037	2.54199e-08	8.84231e-07	60.163	11.7529	33.5927	10.4762	105.567	11.862	41.3293	12.9205
Gsn	1204.81	2.16441	0.274591	7.8823	3.21417e-15	2.10804e-13	99.7967	21.7575	69.7694	21.1599	114.993	22.2244	114.628	21.8882
Btg4	14.5864	2.16222	2.78869	0.775353	0.438131	0.677774	1.42839	0.0432461	0	0	0	0.0803293	4.28517	0.0494091
Aqp7	74.9267	2.16113	0.963404	2.24322	0.0248825	0.136748	6.18909	1.37033	7.57988	0.933524	3.77025	1.79402	7.21712	1.38345
Avil	167.441	2.15662	0.682182	3.16136	0.00157037	0.0182226	14.0664	2.82692	24.2901	2.59312	9.67698	3.61482	8.23203	2.27282
Cd96	21.2617	2.14421	2.48723	0.862089	0.388639	0.638711	2.12466	0.0204505	6.37399	0.034575	0	0.0267764	0	0
Doc2g	63.3977	2.14407	1.24456	1.72275	0.0849336	0.284514	5.72169	0.674558	13.0925	1.03725	0.125675	0.615858	3.94686	0.370568
Tspan1	13.7189	2.1435	2.37663	0.901906	0.367107	0.619319	1.16613	0.217976	1.55043	0.06915	1.94796	0.214211	0	0.370568
Eif4g1	16289.6	2.13892	0.121811	17.5593	5.05031e-69	2.34966e-66	1340.6	302.867	1129.4	293.68	1557.18	336.526	1335.22	278.395
BC039771	105.908	2.13863	1.06019	2.01721	0.0436737	0.194152	10.0882	0.596938	27.9078	0.5532	0.439863	0.669411	1.91705	0.568204
Spnb1	8733.57	2.13855	0.141547	15.1084	1.42575e-51	4.33196e-49	719.425	161.712	605.529	161.638	681.787	153.804	870.96	169.695
Cc2d1a	4119.64	2.13656	0.215364	9.9207	3.38385e-23	3.4744e-21	340.332	75.3019	314.048	79.3496	250.973	80.8916	455.975	65.6646
Erv3	8.84327	2.11303	2.43174	0.868937	0.384882	0.635661	0.689935	0.20227	0.68908	0.380325	0.816888	0.0535529	0.563838	0.172932
Akap6	17439.2	2.08456	0.139012	14.9956	7.84662e-51	2.24655e-48	1427.27	332.19	1095.29	333.752	1555.73	309.616	1630.79	353.201
Pim1	199.396	2.07493	0.617484	3.36029	0.000778609	0.0103499	16.6412	3.47605	29.6305	3.90697	8.73442	2.54376	11.5587	3.97743
4931440F15Rik	42.8863	2.07361	1.22714	1.68979	0.0910684	0.296615	3.62549	0.701354	7.06307	0.864374	1.44526	0.696187	2.36812	0.5435
Cd300ld	24.726	2.06445	1.62791	1.26816	0.204741	0.462011	2.19736	0.29727	5.51264	0.311175	0.628375	0.160659	0.45107	0.419977
Zfp318	5701.07	2.06296	0.157648	13.0859	3.96684e-39	7.77083e-37	464.502	110.685	506.646	106.802	401.846	116.799	485.013	108.453
Phldb2	218.65	2.06069	0.626967	3.28676	0.00101348	0.0129406	18.434	3.62577	16.3657	3.90697	6.34659	3.23995	32.5898	3.73038
Tmem38b	6701.71	2.05808	0.23386	8.80048	1.36236e-18	1.09047e-16	537.496	138.645	679.95	91.3471	415.105	97.3323	517.434	227.257
Fasn	13301.6	2.05638	0.120142	17.1162	1.12282e-65	4.6435e-63	1082.87	259.142	1060.67	261.56	1240.92	275.047	947.022	240.82
Nedd4	30627.3	2.04786	0.122868	16.6671	2.27191e-62	8.9011e-60	2483.86	606.155	2447.27	605.2	2482.21	706.55	2522.1	506.715
Il21r	18.8157	2.04408	1.77837	1.14941	0.250386	0.514172	1.60115	0.297179	0.861351	0.172875	0.5027	0.348094	3.43941	0.370568
Pomc	489.034	2.0418	0.508714	4.01364	5.97884e-05	0.00113248	42.2413	7.09772	10.6807	6.5001	24.758	6.64055	91.2853	8.1525
Spnb4	7235.07	2.02977	0.13716	14.7986	1.49528e-49	3.97531e-47	586.862	143.091	513.882	133.079	575.906	145.396	670.798	150.796
Prrc2b	31526.1	2.02875	0.109328	18.5566	7.21525e-77	3.70416e-74	2557.34	623.352	2303.08	616.679	2992.32	667.831	2376.63	585.547
E130306D19Rik	17.9376	2.02545	2.08006	0.973742	0.330184	0.589423	1.652	0.157733	0	0.034575	4.33579	0.240988	0.620221	0.197636
Colq	19.0904	2.01742	2.33173	0.865203	0.386927	0.637399	1.83339	0.0926552	4.82356	0	0	0.0803293	0.676605	0.197636
Pole	90.0955	2.01628	0.86707	2.3254	0.0200508	0.11865	7.38951	1.7003	11.8866	1.97077	4.58714	1.8208	5.69476	1.30934
Slco1c1	149.698	2.01542	0.739861	2.72405	0.00644875	0.0538469	12.6084	2.49479	3.4454	1.90162	11.9391	3.18639	22.4407	2.39634
Adamtsl1	351.417	2.01384	0.587831	3.42589	0.000612785	0.00851039	29.6455	5.80929	57.0214	4.21815	21.4276	6.29246	10.4874	6.91727
Klri2	12.2757	2.01184	2.42642	0.829137	0.407027	0.652332	0.968829	0.269674	0	0.518625	1.94796	0.240988	0.958524	0.0494091
C230081A13Rik	2312.5	2.00757	0.213224	9.4153	4.7172e-21	4.36209e-19	187.311	45.9994	206.552	44.3597	208.558	46.4035	146.823	47.2351
N4bp2	2051.9	2.00741	0.266172	7.54177	4.63618e-14	2.81728e-12	168.359	38.6585	118.35	36.0271	268.379	38.6919	118.35	41.2566
Kdm6b	5119.49	2.00649	0.199646	10.0503	9.16102e-24	9.88328e-22	415.63	100.88	328.002	107.805	556.678	89.9152	362.209	104.92
Fbxo34	2064.95	1.99803	0.205031	9.74504	1.93695e-22	1.93539e-20	166.709	41.6253	147.635	39.7266	183.171	43.9669	169.32	41.1825
Gbp7	155.347	1.99425	0.66744	2.98791	0.00280888	0.0283132	12.551	3.12212	11.0253	3.38835	11.1222	3.18639	15.5055	2.79161
1810021B22Rik	53.917	1.99136	1.17841	1.68987	0.0910536	0.296615	4.64423	0.7955	9.8194	0.829799	3.26755	0.642634	0.845756	0.914068
Mks1	161.855	1.97827	0.664466	2.97724	0.00290861	0.0291605	13.2443	3.08537	17.3993	3.28462	6.09524	2.46343	16.2385	3.50804
Kif5a	46666	1.97522	0.126622	15.5993	7.36197e-55	2.38272e-52	3766.25	941.92	3779.95	902.614	4613.47	987.14	2905.34	936.005
Nefm	9444.12	1.97449	0.141732	13.9312	4.09486e-44	9.09916e-42	760.273	192.552	627.58	179.963	789.553	217.103	863.686	180.59
Zp1	42.2321	1.969	1.53173	1.28547	0.198627	0.454634	3.91097	0.349859	0	0.380325	1.69661	0.348094	10.0363	0.321159
Adra2b	58.0534	1.96399	1.43396	1.36963	0.170801	0.420939	5.26536	0.591705	9.8194	0.311175	0	0.401646	5.97668	1.06229
Ift172	1520.14	1.96094	0.233332	8.40407	4.31248e-17	3.22634e-15	121.99	31.3781	117.488	33.3994	124.607	31.1142	123.875	29.6207
Acss3	122.814	1.95959	0.875274	2.23883	0.0251671	0.137753	10.77	1.62079	23.7733	1.76332	1.31959	1.41915	7.21712	1.67991
Mapk8ip3	15453.1	1.95773	0.130405	15.0126	6.06823e-51	1.77145e-48	1241.2	317.872	1265.67	321.271	1070.06	327.69	1387.89	304.656
Egf	87.1071	1.94506	1.02848	1.89121	0.0585964	0.23095	7.69976	1.08855	16.8825	0.829799	0.691213	0.830069	5.52561	1.60579
Tssk1	9.9224	1.94224	3.19286	0.608307	0.542984	0.755579	0.958524	0.0425555	0	0	0	0.0535529	2.87557	0.0741136
4922501L14Rik	763.113	1.94104	0.352137	5.51216	3.54457e-08	1.20483e-06	61.9292	15.062	47.202	13.9683	96.0157	15.5303	42.5697	15.6874
Cltc	27322.6	1.93967	0.121522	15.9614	2.37241e-57	8.02738e-55	2191.06	565.541	2611.96	565.474	2215.02	626.113	1746.21	505.035
Pprc1	1198.61	1.93817	0.28105	6.89616	5.34272e-12	2.8408e-10	96.064	24.8644	79.5888	28.5244	119.517	23.2419	89.0863	22.827
Lmo7	696.801	1.9296	0.372169	5.18475	2.1631e-07	6.52211e-06	55.8274	14.4735	65.4626	11.3406	63.3402	14.8609	38.6793	17.2191
Lcp1	210.923	1.92652	0.580315	3.31978	0.000900897	0.0116936	16.9881	4.29211	19.122	5.2554	9.73982	3.34705	22.1024	4.27388
Xirp2	58.791	1.92394	1.45231	1.32475	0.185254	0.438321	5.6708	0.260676	15.5043	0.20745	1.5081	0.401646	0	0.172932
Itpkb	1621.74	1.92356	0.240899	7.98494	1.40596e-15	9.51452e-14	129.822	33.7961	160.9	34.6441	120.648	30.5519	107.919	36.1921
4930447K03Rik	12.6554	1.92196	2.10657	0.912365	0.361577	0.616204	1.07039	0.206433	1.89497	0.20745	0.188513	0.214211	1.12768	0.197636
Fry	9943.72	1.92163	0.155344	12.3702	3.79007e-35	6.63841e-33	798.401	204.83	643.257	195.176	1080.87	212.685	671.08	206.629
Alx4	167.279	1.92161	0.711999	2.69889	0.00695709	0.0566265	13.997	2.87994	26.1851	2.66227	4.0216	2.22244	11.7842	3.75509
4930544O15Rik	31.1022	1.92145	1.71779	1.11856	0.263328	0.526023	2.8107	0.327226	0	0.380325	1.94796	0.428423	6.48413	0.172932
Kalrn	8951.67	1.89809	0.179191	10.5926	3.22677e-26	3.97025e-24	718.645	184.497	616.899	176.402	1024.82	186.123	514.22	190.966
Cul7	3761.69	1.89799	0.165009	11.5023	1.28395e-30	1.87407e-28	299.448	80.0722	270.12	77.1368	340.894	85.631	287.332	77.4487
Ltbp4	904.845	1.8966	0.386287	4.90981	9.1163e-07	2.5134e-05	73.9011	17.3895	115.593	16.2848	75.7192	17.726	30.3908	18.1578
2900026A02Rik	1977.17	1.89569	0.228914	8.28122	1.21924e-16	8.85464e-15	157.831	41.6472	184.674	40.1761	117.695	41.8783	171.125	42.8871
1110037F02Rik	2039.9	1.89359	0.214206	8.84006	9.56678e-19	7.91158e-17	162.181	43.6267	144.707	46.9874	170.541	42.4139	171.294	41.4789
Actbl2	29.7734	1.89221	2.42723	0.779574	0.435641	0.675467	2.98602	0.017851	8.95805	0	0	0.0535529	0	0
Ogdhl	2642.97	1.89007	0.227287	8.31578	9.11472e-17	6.68472e-15	212.148	54.5036	311.464	55.5966	173.871	60.0863	151.108	47.828
Setx	5604.58	1.88649	0.152584	12.3637	4.11022e-35	7.11545e-33	445.452	120	392.604	122.81	500.124	121.324	443.627	115.864
Fgl1	26.2806	1.88508	1.91173	0.986057	0.324105	0.584304	2.5584	0.0930725	7.23534	0.06915	0.439863	0.160659	0	0.0494091
Dync2h1	3381.86	1.88462	0.234199	8.04706	8.48045e-16	5.84523e-14	271.347	69.8517	320.767	75.3043	336.809	62.9782	156.465	71.2726
Rai1	5158.95	1.88421	0.155777	12.0956	1.11471e-33	1.8039e-31	410.075	110.416	364.179	110.951	476.434	112.488	389.612	107.811
Itprip	57.5738	1.87882	1.20057	1.56495	0.117595	0.342299	5.24364	0.565035	13.7816	0.795224	0.314188	0.455199	1.63513	0.444682
Ezr	847.549	1.87725	0.310355	6.04872	1.46005e-09	5.97175e-08	67.175	18.3349	69.5971	15.2821	59.1929	20.4036	72.7351	19.3189
Spef2	40.4634	1.87414	1.24709	1.50281	0.132887	0.366332	3.1663	0.916093	2.58405	1.383	3.64458	0.722964	3.27026	0.642318
Cad	898.374	1.8736	0.291982	6.41682	1.39151e-10	6.33543e-09	71.2418	19.396	76.1434	21.5748	76.9131	18.8506	60.6689	17.7626
Dnahc6	280.3	1.87335	0.579425	3.23312	0.00122446	0.0150163	23.761	4.51876	54.4374	6.18892	8.10604	2.62409	8.73948	4.74327
Hoxd9	13.6411	1.87257	3.16344	0.591942	0.553889	0.763015	1.35321	0.02305	0	0.06915	0	0	4.05963	0
C330005M16Rik	15.0311	1.87215	2.20952	0.847314	0.39682	0.645192	1.33068	0.185819	0	0.20745	0.439863	0.0535529	3.55218	0.296454
Pyhin1	14.0926	1.87145	2.28112	0.820407	0.411984	0.656775	1.17013	0.251679	0	0.380325	0.691213	0.0535529	2.81919	0.321159
Col11a2	185.624	1.87127	0.686427	2.7261	0.0064088	0.0536336	15.66	3.06779	3.78994	2.24737	10.431	3.37383	32.759	3.58216
Pja1	12634.5	1.86725	0.133213	14.017	1.22655e-44	2.7668e-42	999.587	275.121	1092.36	271.033	954.188	314.918	952.209	239.412
Parp1	3080.82	1.86409	0.183356	10.1665	2.79784e-24	3.15562e-22	243.939	66.8883	214.132	65.9691	252.23	72.2428	265.455	62.4531
Ctnnb1	15766.5	1.86306	0.141393	13.1765	1.19858e-39	2.37926e-37	1248.99	341.71	1333.72	336.726	1043.86	372.112	1369.39	316.292
Clip1	6901.11	1.85995	0.182921	10.1681	2.75328e-24	3.12908e-22	548.625	147.634	632.92	142.069	383.937	157.82	629.017	143.015
E330023G01	48.9712	1.85963	1.14941	1.61791	0.105682	0.322546	3.86174	1.07901	4.82356	0.656925	2.70201	1.09783	4.05963	1.48227
Bpifc	27.6177	1.85593	1.4787	1.25511	0.209438	0.466861	2.20434	0.582032	3.27313	0.829799	2.32499	0.348094	1.01491	0.568204
Dnahc10	249.62	1.85405	0.56147	3.30214	0.000959498	0.0123147	20.2382	4.94615	17.5716	4.94422	9.42563	4.311	33.7175	5.58322
Myo5a	21723.8	1.85164	0.111495	16.6073	6.17316e-62	2.35656e-59	1717.03	474.701	1590.91	472.087	1878.53	483.1	1681.65	468.917
Myo10	2379.88	1.85049	0.20284	9.1229	7.31383e-20	6.52026e-18	188.365	51.7433	163.312	47.8172	228.854	52.9638	172.929	54.4488
Fbxl13	9.55572	1.84849	2.65572	0.696043	0.486402	0.714989	0.851944	0.112142	1.55043	0.103725	1.0054	0.133882	0	0.0988181
Pdcd11	1121.27	1.84322	0.265418	6.94457	3.79607e-12	2.05512e-10	88.5257	24.6003	88.2023	26.2078	99.2833	24.7414	78.0915	22.8517
Phkg1	141.066	1.84161	0.717883	2.56533	0.0103077	0.074839	11.2796	2.95261	17.3993	2.69685	8.5459	2.67764	7.89373	3.48334
Smc3	4060.12	1.84019	0.165308	11.1319	8.77493e-29	1.22095e-26	319.956	89.6734	311.12	82.1156	317.267	101.081	331.48	85.8235
Ptk6	10.4504	1.83542	2.56207	0.716384	0.473754	0.704849	0.877459	0.176894	0	0.20745	0.377025	0.0267764	2.25535	0.296454
Eif4g3	10893.5	1.83255	0.129579	14.1424	2.07986e-45	4.99435e-43	859.916	239.144	738.866	231.652	1054.66	262.945	786.215	222.835
Morc2b	39.051	1.82881	1.67247	1.09348	0.274184	0.537324	3.2734	0.666491	4.47902	0.48405	5.34119	0.428423	0	1.087
Ascc3	1574.77	1.82504	0.235982	7.73382	1.04364e-14	6.58377e-13	123.893	34.9865	112.665	38.3091	123.413	32.5334	135.603	34.117
Sec22c	1836.29	1.82261	0.218745	8.33216	7.93828e-17	5.85075e-15	144.612	40.6525	158.833	43.1841	152.821	39.1471	122.184	39.6261
Dna2	75.045	1.82019	0.970929	1.87469	0.0608348	0.236189	6.10797	1.46339	9.99167	1.6596	2.07364	1.44593	6.2586	1.28464
Smarca4	12186.5	1.81947	0.133014	13.6788	1.35866e-42	2.88967e-40	958.394	271.111	817.938	268.924	1050.45	301.663	1006.79	242.747
Magee1	7917.45	1.819	0.131078	13.8772	8.70817e-44	1.90658e-41	622.272	176.528	582.79	168.138	688.951	198.172	595.074	163.272
Ccdc11	36.1657	1.81324	1.33674	1.35646	0.174952	0.425951	2.89211	0.756671	1.03362	0.2766	1.94796	1.17816	5.69476	0.81525
Nos3	117.758	1.81282	0.806172	2.24868	0.0245327	0.135375	9.43399	2.44676	17.0547	2.83515	6.84929	1.39237	4.39793	3.11277
Kcnj8	51.4344	1.79772	1.56794	1.14655	0.251569	0.515393	4.76357	0.425699	11.7144	0.1383	2.57634	0.669411	0	0.469386
Eftud2	2490.11	1.7974	0.199123	9.02658	1.77124e-19	1.53315e-17	195.124	56.1053	190.531	51.4476	178.836	61.5055	216.006	55.3629
Cnga2	23.4072	1.79488	1.93538	0.927406	0.353716	0.609435	2.09032	0.271256	4.13448	0.1383	2.13648	0.428423	0	0.247045
Herc2	13992.1	1.79307	0.168379	10.649	1.7624e-26	2.20493e-24	1104.96	306.715	869.792	311.348	1554.79	297.593	890.3	311.203
Heatr1	657.748	1.78969	0.345828	5.17509	2.27802e-07	6.83773e-06	51.82	14.5408	67.1853	16.354	53.0349	13.9773	35.2398	13.291
Lrpprc	3773.13	1.78761	0.164601	10.8602	1.78283e-27	2.32601e-25	295.373	85.3009	278.216	84.6741	335.175	90.6918	272.728	80.5368
Srrm2	21077.6	1.78532	0.152675	11.6936	1.37463e-31	2.04654e-29	1660.9	465.637	1380.92	498.813	2313.8	472.39	1287.97	425.708
Ccdc86	408.204	1.78306	0.427967	4.16635	3.09515e-05	0.000621031	31.9959	9.1881	38.0717	8.29799	32.487	10.175	25.4291	9.09127
Tfip11	1783.37	1.78175	0.219566	8.11491	4.8615e-16	3.39803e-14	139.517	40.4091	154.009	40.1761	139.876	41.1286	124.664	39.9225
Tnn	22.1084	1.78074	1.95127	0.912604	0.361451	0.616204	2.03468	0.195852	0	0.2766	0.691213	0.187435	5.41284	0.123523
Lrp1	11806.2	1.78034	0.143915	12.3707	3.76355e-35	6.63841e-33	926.52	264.615	752.648	252.743	1189.39	270.71	837.524	270.391
Acsm2	87.1338	1.76619	0.900693	1.96092	0.0498885	0.209636	7.03967	1.75133	12.9203	1.72875	3.5189	1.49948	4.67985	2.02577
Hltf	665.208	1.76586	0.362172	4.87574	1.08401e-06	2.97764e-05	52.6519	14.4615	81.3115	15.4204	37.514	13.7095	39.1303	14.2545
Cdh5	112.579	1.76443	0.820375	2.15076	0.0314948	0.158646	8.99113	2.3671	5.1681	3.0426	15.7722	2.00823	6.03306	2.05048
Mthfd1	1431.74	1.76313	0.286313	6.15806	7.36417e-10	3.14148e-08	113.772	30.6775	184.501	32.7079	80.809	31.0874	76.0053	28.2373
Slc16a6	123.932	1.75581	0.794011	2.21132	0.0270138	0.144632	10.1649	2.33873	18.4329	2.59312	2.70201	1.9279	9.3597	2.49516
Gucy2g	31.4829	1.75337	2.10308	0.833713	0.404443	0.650057	3.10086	0.0754759	9.30259	0.172875	0	0.0535529	0	0
Micall2	418.018	1.75272	0.495408	3.53794	0.000403268	0.00596804	33.4214	8.75282	57.0214	7.3299	17.5317	9.96083	25.711	8.96775
Nes	297.065	1.7479	0.509512	3.43054	0.000602373	0.00837361	23.239	6.73217	14.643	5.73945	31.1674	5.81048	23.9067	8.64659
Kndc1	5845.22	1.74698	0.160346	10.895	1.21703e-27	1.63236e-25	456.042	133.688	570.042	135.949	424.09	136.774	373.993	128.34
Col1a1	361.172	1.74309	0.448888	3.88313	0.00010312	0.00184082	28.1625	8.27646	29.6305	7.50277	33.9951	9.37175	20.862	7.95486
Notch2	448.28	1.74097	0.407243	4.27501	1.91128e-05	0.000402548	35.036	10.1913	25.8405	9.61184	30.6647	9.10399	48.6028	11.8582
Mcm3ap	2381.68	1.74009	0.207547	8.38407	5.11284e-17	3.806e-15	185.364	54.9249	161.934	54.179	224.895	53.5529	169.264	57.0428
A430092G05Rik	12.7666	1.73322	2.14348	0.808602	0.418744	0.662163	1.15284	0.135192	3.10086	0.172875	0.188513	0.133882	0.169151	0.0988181
Chd7	1568.98	1.73263	0.245894	7.04626	1.83787e-12	1.00968e-10	121.808	36.488	136.61	33.5377	125.801	35.5591	103.013	40.3672
Phldb1	3888.17	1.73135	0.163447	10.5927	3.22065e-26	3.97025e-24	301.593	90.6886	312.326	88.6848	278.056	90.3437	314.396	93.0373
Tfap2a	113.275	1.73076	0.88378	1.95836	0.0501876	0.210477	9.54299	1.88545	21.5338	1.5213	3.20471	2.35633	3.89048	1.77873
4931406B18Rik	90.6567	1.72676	0.863364	2.00004	0.0454957	0.198497	7.12056	2.02588	8.61351	1.90162	3.89593	1.9279	8.85225	2.24811
Lima1	593.959	1.72649	0.396054	4.35923	1.30519e-05	0.00028534	46.9185	13.0065	27.7355	12.1012	38.1424	13.9237	74.8776	12.9946
Tenc1	370.426	1.72355	0.470032	3.66688	0.000245524	0.00390113	29.1561	8.21652	46.3407	9.05864	18.3486	8.9701	22.779	6.62081
Aco1	1267.19	1.72127	0.295571	5.82356	5.76075e-09	2.1388e-07	99.5244	28.3238	150.047	28.0403	80.809	28.2491	67.7169	28.682
Erbb2	79.003	1.72017	1.21402	1.41693	0.156505	0.401386	7.19687	0.773813	18.0884	0.933524	0.0628375	0.696187	3.43941	0.691727
St6galnac1	9.76748	1.72002	2.73021	0.629995	0.528698	0.746028	0.927389	0.0580613	0	0.06915	0.188513	0.0803293	2.59365	0.0247045
Apc	17599.1	1.71931	0.120584	14.2582	3.98754e-46	9.89442e-44	1364.04	411.558	1149.9	399.099	1410.2	413.053	1532	422.522
Odz2	5339.07	1.71893	0.178844	9.61134	7.16142e-22	6.96857e-20	414.956	123.708	478.05	114.996	462.798	130.133	304.021	125.993
Ppargc1b	1473.89	1.71477	0.234729	7.30533	2.76592e-13	1.61486e-11	114.1	34.6015	114.043	35.8543	95.136	30.177	133.122	37.7732
Gbp5	40.4539	1.71306	1.3182	1.29955	0.193757	0.448919	3.12365	0.957776	1.03362	1.59045	3.77025	0.615858	4.56708	0.667022
Col4a2	680.326	1.71241	0.332306	5.15309	2.56223e-07	7.64457e-06	52.4625	16.1762	51.681	13.7263	60.2612	20.6714	45.4453	14.131
Bmf	124.996	1.71092	0.754785	2.26677	0.0234043	0.131339	9.92095	2.69	17.0547	3.14632	5.15268	2.65087	7.55542	2.27282
Ptgdr	40.3542	1.7108	1.27988	1.33669	0.181324	0.433941	3.29203	0.779338	6.8908	0.933524	1.06824	0.910399	1.91705	0.494091
Slc7a13	24.4198	1.70606	1.60048	1.06596	0.286441	0.549553	2.07079	0.392942	4.65129	0.4149	0.377025	0.294541	1.18406	0.469386
Fam154b	60.6573	1.70591	1.05827	1.61197	0.106967	0.325139	4.84152	1.27824	8.44124	1.1064	2.13648	1.09783	3.94686	1.6305
4932411E22Rik	462.034	1.70147	0.404929	4.20191	2.64678e-05	0.000539059	35.7575	10.8575	36.8658	9.75014	27.837	11.4335	42.5697	11.3888
Lama4	132.728	1.70027	0.804454	2.11357	0.034552	0.168163	10.6411	2.74999	18.2606	2.0745	10.054	2.86508	3.60856	3.31041
Podn	92.4592	1.69767	0.989065	1.71644	0.0860819	0.286773	7.79799	1.5303	11.7144	1.90162	0.628375	1.23172	11.0512	1.45757
Tjp2	843.267	1.6974	0.324132	5.23674	1.63434e-07	5.06917e-06	65.3105	19.7675	75.1098	20.2609	47.1281	21.1802	73.6936	17.8614
Popdc3	12.9655	1.69543	2.60744	0.650228	0.515545	0.737455	1.17082	0.137283	0	0	3.45606	0.214211	0.0563838	0.197636
Ctnnd1	2266.2	1.69357	0.22039	7.68441	1.53704e-14	9.57468e-13	175.423	53.2162	226.018	54.6285	139.499	56.8464	160.75	48.1738
Mcf2l	5361.16	1.69329	0.149328	11.3394	8.3685e-30	1.18657e-27	413.671	127.222	347.297	115.688	421.388	132.624	472.327	133.355
Kif27	317.283	1.69068	0.493819	3.42368	0.0006178	0.00856406	24.7533	7.25766	29.2859	7.67564	14.0756	6.90832	30.8983	7.18902
Fam161b	895.621	1.68936	0.341862	4.94164	7.74669e-07	2.16791e-05	69.9861	20.3738	75.1098	18.9817	38.7707	20.9927	96.0779	21.1471
Kif1a	37032.5	1.68933	0.10459	16.152	1.09902e-58	3.89578e-56	2851.67	884.569	2731.34	834.951	2996.47	880.007	2827.19	938.748
Cyp4a31	76.3472	1.68898	1.08295	1.55961	0.118853	0.344103	6.80289	0.899844	17.3993	0.829799	0.75405	0.856846	2.25535	1.01289
Atp6v1a	13992.6	1.68893	0.124882	13.5242	1.12616e-41	2.29674e-39	1078.14	333.584	1232.59	343.295	1009.92	356.876	991.903	300.58
Gfpt2	193.879	1.68603	0.642625	2.62367	0.00869892	0.0667981	15.2979	4.26273	25.6682	3.76867	9.17428	4.81976	11.0512	4.19977
Baiap3	10839.5	1.68574	0.123987	13.5961	4.22476e-42	8.73587e-40	835.344	258.262	980.734	283.826	809.787	257.75	715.51	233.211
Dnmt1	4215.45	1.67918	0.177524	9.45888	3.1127e-21	2.95171e-19	324.967	100.334	390.364	95.0466	316.827	108.15	267.71	97.8052
Tjp1	2941.39	1.6779	0.19492	8.60811	7.42721e-18	5.67058e-16	225.884	70.8756	240.834	71.1207	204.913	80.4364	231.906	61.0696
Dhx9	4328.74	1.67716	0.155639	10.7759	4.47227e-27	5.69087e-25	332.671	104.059	312.843	99.9217	396.316	123.493	288.854	88.7634
Senp7	2341.34	1.67606	0.210794	7.95117	1.84761e-15	1.24467e-13	180.091	56.1297	197.077	56.703	151.941	60.6218	191.254	51.0643
1300017J02Rik	13.0918	1.67567	2.9262	0.572644	0.566886	0.772351	1.27803	0.0428098	0	0.103725	0	0	3.8341	0.0247045
Utrn	3570.61	1.67381	0.170707	9.80519	1.06944e-22	1.07579e-20	274.48	85.7619	294.582	87.5438	244.626	86.1665	284.231	83.5754
Emx2os	79.1952	1.67246	1.05976	1.57815	0.114532	0.337222	6.87295	1.11713	16.1934	0.898949	0.816888	1.04428	3.60856	1.40816
4933403O08Rik	237.078	1.66968	0.620581	2.69051	0.00713439	0.0576638	19.1867	4.73233	36.0045	5.70487	16.0864	4.07002	5.46922	4.42211
Tln2	9052.23	1.66917	0.134084	12.4486	1.42233e-35	2.55127e-33	695.307	217.98	599.845	206.032	725.459	237.105	760.617	210.804
Pls3	2379.94	1.66889	0.211162	7.90336	2.71473e-15	1.80433e-13	182.689	57.4245	192.253	55.7003	158.979	64.3973	196.836	52.176
Eomes	19.1365	1.66662	1.72079	0.968522	0.332784	0.591238	1.4732	0.457492	1.7227	0.4149	1.0054	0.562305	1.69151	0.395273
Pik3cg	67.2209	1.66478	1.01655	1.63768	0.101488	0.315702	5.27805	1.50393	8.95805	1.14097	3.26755	1.41915	3.60856	1.95166
Smc1a	3083.25	1.6626	0.176392	9.42561	4.27612e-21	4.00395e-19	236.362	74.71	223.779	66.5568	261.97	82.4714	223.336	75.1018
Esf1	1433.8	1.66178	0.24862	6.68403	2.32461e-11	1.14979e-09	109.819	34.8378	118.866	29.9765	109.777	40.2717	100.814	34.2652
Bcl6	764.647	1.65651	0.333883	4.96135	7.00044e-07	1.97766e-05	59.0215	18.1244	82.0006	18.7396	46.1227	19.6003	48.9411	16.0332
Pcdha12	136.109	1.65565	0.71645	2.3109	0.0208382	0.121738	10.5797	3.15248	16.0211	3.1809	8.10604	3.21317	7.61181	3.06336
Ctr9	2374.26	1.65543	0.210757	7.85469	4.00773e-15	2.60555e-13	182.63	56.9115	200.178	55.7694	212.391	59.5776	135.321	55.3876
Hecw2	2764.68	1.65509	0.192186	8.61193	7.18421e-18	5.51333e-16	212.18	66.7513	252.376	66.6951	190.146	66.8072	194.017	66.7516
Tpx2	158.102	1.65232	0.75236	2.19618	0.0280792	0.14819	12.8327	3.11834	25.1514	2.4894	9.17428	3.80225	4.1724	3.06336
Birc6	10233.3	1.65145	0.160271	10.3041	6.75153e-25	7.91471e-23	788.221	244.228	684.429	252.536	1054.04	241.898	626.198	238.251
Phox2a	16.6827	1.65089	2.94611	0.560361	0.575233	0.77721	1.66528	0.017851	4.99583	0	0	0.0535529	0	0
Dub1	124.484	1.65	0.78824	2.09328	0.0363244	0.173299	9.81476	2.7445	16.1934	2.24737	4.39863	2.97218	8.85225	3.01395
Ttc12	129.561	1.64435	0.758905	2.16675	0.0302542	0.155004	10.2866	2.78488	6.37399	3.25005	5.08984	2.11534	19.396	2.98925
Iqgap1	827.04	1.64364	0.392301	4.18974	2.79274e-05	0.000564923	65.3638	18.077	23.9455	17.2183	70.8807	18.9042	101.265	18.1084
Parp4	162.304	1.6364	0.653005	2.50595	0.0122123	0.0841356	12.4938	3.88113	15.6766	4.07985	13.5729	3.88258	8.23203	3.68098
Matr3	12374.8	1.63638	0.138714	11.7968	4.05488e-32	6.35463e-30	943.141	305.368	1030.86	288.01	906.117	362.151	892.442	265.944
Ogdh	10823.9	1.63533	0.121486	13.4611	2.65097e-41	5.33347e-39	825.986	266.046	900.284	294.06	819.087	260.294	758.587	243.784
Chat	82.5463	1.63489	0.916845	1.78316	0.0745596	0.265377	6.45373	1.87443	10.853	1.69417	4.33579	2.24922	4.1724	1.67991
Utp20	851.224	1.63485	0.343062	4.76545	1.88434e-06	4.93909e-05	65.8211	20.0596	51.1642	18.8779	98.6549	19.0916	47.6443	22.2094
Nup98	1325.42	1.63478	0.379675	4.30573	1.66434e-05	0.000355542	104.788	28.9344	33.5927	31.2212	139.248	27.0977	141.523	28.4843
Aqr	1581.21	1.63458	0.238227	6.86144	6.81685e-12	3.56103e-10	121.169	38.3615	155.388	40.591	106.007	39.7094	102.111	34.784
Hhat	39.0205	1.63247	1.3258	1.23131	0.218206	0.478525	3.06324	0.873575	4.30675	0.5532	0.879725	1.17816	4.00325	0.889363
Oplah	356.33	1.62908	0.443571	3.67265	0.000240047	0.00381819	27.1831	8.76731	25.6682	8.47087	30.7904	9.50563	25.0908	8.32543
Mical1	349.985	1.6278	0.525313	3.09872	0.0019436	0.0213867	27.4664	7.84394	35.1431	8.50544	10.4939	8.0597	36.7622	6.96668
Epas1	2153.7	1.62726	0.217757	7.4728	7.85057e-14	4.71287e-12	165.178	52.1111	213.27	54.6976	120.837	48.2243	161.427	53.4112
Asb3	548.248	1.62648	0.447057	3.6382	0.000274552	0.00430719	43.7817	11.5316	83.2065	11.7555	28.9681	12.2904	19.1705	10.5488
Prdm10	550.567	1.62464	0.438592	3.7042	0.000212055	0.00343722	43.2799	12.2673	74.7652	11.2369	22.9357	12.7188	32.1387	12.8464
4930579G22Rik	22.1547	1.62402	1.94004	0.837106	0.402533	0.648931	1.99551	0.239698	0	0.1383	1.19391	0.481976	4.79262	0.0988181
Crnkl1	774.118	1.62243	0.320082	5.06879	4.0036e-07	1.16417e-05	59.0165	19.085	64.7736	20.4684	49.0133	19.8146	63.2626	16.972
Arhgef11	3857.53	1.62172	0.16807	9.64909	4.95961e-22	4.92258e-20	294.027	95.162	275.977	96.1184	272.652	94.6011	333.454	94.7666
AW551984	10905.8	1.61906	0.126252	12.8241	1.20247e-37	2.2378e-35	829.193	271.102	833.443	272.001	852.642	302.413	801.495	238.893
Speer8-ps1	40.2137	1.61838	1.53425	1.05483	0.291501	0.554624	3.30152	0.755673	4.82356	0.172875	0.0628375	0.883622	5.01815	1.21052
Vim	1575.14	1.61802	0.244279	6.62364	3.50467e-11	1.67774e-09	120.022	38.8951	137.644	34.6441	102.551	40.5127	119.872	41.5283
Ttc25	71.0945	1.61639	1.01037	1.5998	0.109644	0.329599	5.79399	1.3788	11.7144	1.69417	1.38243	1.23172	4.28517	1.21052
Zfp473	38.8158	1.61567	1.25324	1.28919	0.197331	0.452606	2.96834	0.947815	4.13448	1.34842	3.07904	0.803293	1.69151	0.691727
4930413F20Rik	25.6917	1.60685	1.56954	1.02377	0.305943	0.568397	2.12111	0.470945	0.34454	0.311175	1.5081	0.508752	4.5107	0.592909
Klk14	18.1677	1.60425	1.86442	0.86046	0.389536	0.639617	1.50051	0.332444	1.89497	0.2766	0.125675	0.37487	2.48089	0.345863
Pnmal2	39360.4	1.60119	0.104512	15.3206	5.57027e-53	1.72771e-50	2984.43	986.677	2943.92	978.195	3112.09	1092.1	2897.28	889.734
Ubr5	7893.61	1.59723	0.132259	12.0765	1.40506e-33	2.24931e-31	598.579	197.815	602.256	187.95	641.257	215.443	552.223	190.052
Acer1	31.1031	1.59448	1.46703	1.08687	0.277093	0.539894	2.68469	0.45333	6.71853	0.587775	0.377025	0.401646	0.958524	0.370568
Apeh	1143.86	1.5938	0.317426	5.02102	5.13972e-07	1.47154e-05	87.7528	27.6525	119.728	25.9658	53.0349	30.3109	90.4959	26.6809
Tln1	1153.77	1.5933	0.295029	5.40048	6.64628e-08	2.20378e-06	88.5	27.9053	71.3198	28.0057	129.508	28.1152	64.6722	27.595
Synm	1727.4	1.59297	0.256904	6.20062	5.62419e-10	2.42003e-08	132.291	41.988	80.7947	40.4527	170.101	42.8958	145.978	42.6153
Ddb1	7200.74	1.592	0.135929	11.712	1.10626e-31	1.66363e-29	545.547	180.942	558.844	173.013	588.725	201.278	489.073	168.534
Ptpn18	43.9098	1.59066	1.56602	1.01573	0.309756	0.572378	3.95423	0.475871	9.47486	0.449475	2.38783	0.508752	0	0.469386
Fndc3b	1860.46	1.58961	0.261155	6.08685	1.15155e-09	4.85675e-08	143.707	43.9967	230.325	48.7161	91.8056	43.9937	108.99	39.2802
Lamc2	127.852	1.58805	0.781957	2.03087	0.0422682	0.19029	10.0713	2.82772	4.13448	2.55855	7.98036	3.45416	18.0992	2.47045
Rxfp2	56.3475	1.58774	1.35465	1.17207	0.24117	0.502927	5.21799	0.466964	0	0.2766	1.44526	0.481976	14.2087	0.642318
Sh2d2a	30.543	1.58541	1.57895	1.00409	0.315334	0.577523	2.47682	0.604683	4.82356	0.172875	2.32499	0.776516	0.281919	0.864659
Skap1	109.601	1.58504	0.796359	1.99036	0.0465513	0.201294	8.4852	2.57255	3.78994	2.00535	8.92293	2.94541	12.7427	2.76691
Mylk4	214.998	1.58355	0.588145	2.69245	0.00709284	0.0573903	16.4352	5.25609	15.332	4.04527	10.1797	5.59627	23.7939	6.12672
Ttf2	89.245	1.58146	0.912662	1.7328	0.0831318	0.281267	7.098	1.90601	1.7227	1.5213	8.29455	2.19567	11.2768	2.00107
Zdbf2	16421.7	1.58145	0.178908	8.83946	9.61846e-19	7.91158e-17	1257.89	398.909	1044.47	426.344	1843.53	379.904	885.676	390.48
Xrn2	1588.17	1.57676	0.228627	6.89662	5.32555e-12	2.8408e-10	120.13	40.1022	116.799	37.9287	137.363	43.2707	106.227	39.1073
Zfp648	64.1478	1.57593	1.09288	1.442	0.149303	0.390999	5.31094	1.16099	10.3362	1.07182	0.691213	0.830069	4.90539	1.58109
Cdr1	9283.22	1.57554	0.156901	10.0416	1.00011e-23	1.0712e-21	703.222	233.371	560.567	251.395	849.94	235.418	699.159	213.299
Ppp1r3d	347.817	1.57519	0.455498	3.45817	0.000543866	0.00766043	26.399	8.69253	21.5338	8.26342	23.4384	8.64879	34.2249	9.16538
Thbs4	53.2302	1.57085	1.44578	1.08651	0.277252	0.539894	4.74639	0.62406	11.0253	0.795224	0	0.508752	3.21387	0.568204
Mllt4	6431.91	1.57052	0.160019	9.81456	9.74588e-23	9.8922e-21	484.875	164.047	486.146	145.976	445.518	191.639	522.959	154.527
Nefh	5079.25	1.56994	0.171581	9.14983	5.70233e-20	5.11423e-18	385.312	127.138	300.784	128.861	503.768	136.64	351.384	115.914
Ckap5	6693.41	1.56643	0.136747	11.455	2.22049e-30	3.17871e-28	505.064	170.24	465.646	160.462	583.761	192.148	465.786	158.109
Polr3a	984.965	1.56545	0.280085	5.58921	2.28102e-08	8.02832e-07	74.3276	25.0465	80.4501	25.8621	66.922	25.1163	75.6106	24.161
Slc4a5	15.0643	1.56481	2.71452	0.576458	0.564306	0.771013	1.3908	0.129048	0	0	0	0.214211	4.1724	0.172932
5031426D15Rik	88.2052	1.55201	0.897683	1.72891	0.0838253	0.282735	6.85568	2.04342	11.8866	1.7979	3.26755	1.71369	5.41284	2.61868
Sipa1l1	6174.47	1.5513	0.142852	10.8595	1.79669e-27	2.32601e-25	464.853	158.094	522.495	167.412	450.482	150.269	421.581	156.602
Sorbs2	2557.15	1.55006	0.189947	8.16049	3.33667e-16	2.36554e-14	192.382	65.6113	202.59	70.2909	201.457	62.9782	173.098	63.5648
Ap3b2	6509.69	1.54934	0.179867	8.61384	7.06539e-18	5.45024e-16	494.044	162.724	664.618	161.05	475.492	170.271	342.024	156.849
Abcb1a	105.716	1.54592	0.986076	1.56775	0.116939	0.341371	9.23595	1.42985	4.47902	1.7979	22.4958	1.23172	0.732989	1.25993
Med12	690.014	1.54241	0.335469	4.59777	4.27029e-06	0.000104223	51.8716	17.7445	52.0256	17.0455	58.3132	16.8691	45.2762	19.3189
Plcd4	446.646	1.54217	0.443644	3.47615	0.000508674	0.00724702	34.0237	11.0388	47.7188	10.0613	20.2965	11.8887	34.0558	11.1664
Zc3h7a	655.33	1.5421	0.363187	4.24601	2.17608e-05	0.000451848	50.056	16.0608	50.6474	16.0082	71.949	17.9938	27.5717	14.1804
Ckb	17207	1.54176	0.151674	10.165	2.84227e-24	3.18163e-22	1299.22	436.803	1649.66	448.541	968.326	459.43	1279.69	402.437
Syt15	63.7995	1.54064	1.03886	1.48301	0.138072	0.374429	4.83683	1.59996	5.1681	1.34842	2.57634	2.14211	6.76605	1.30934
Plagl2	420.49	1.53884	0.473631	3.24902	0.00115802	0.0143433	32.4632	9.96039	43.2398	10.0613	13.3844	9.66629	40.7655	10.1536
Cenpj	159.945	1.53574	0.64771	2.37104	0.0177383	0.108968	12.0107	4.12621	13.9539	4.5639	10.7452	3.93613	11.3331	3.87861
2810442I21Rik	84.1837	1.5351	0.978076	1.56951	0.11653	0.340576	6.88879	1.60458	15.1598	1.383	2.0108	1.87435	3.49579	1.55639
Tekt2	191.029	1.53386	0.602277	2.54677	0.0108725	0.0778969	14.3223	4.95087	13.0925	5.01337	13.6357	5.51594	16.2385	4.32329
Ly75	73.9417	1.53348	1.06592	1.43865	0.150249	0.392165	6.00338	1.45666	0.68908	1.45215	9.99117	1.31204	7.32989	1.60579
Nek3	178.556	1.5328	0.663004	2.3119	0.0207834	0.121581	13.8003	4.21438	23.2565	3.83782	10.8709	4.60555	7.27351	4.19977
Cbx2	132.431	1.53126	0.755082	2.02794	0.0425662	0.191054	10.0633	3.29778	6.02945	4.21815	15.6465	2.78475	8.51395	2.89043
Kif4	75.8372	1.52962	0.965799	1.58379	0.113241	0.335376	5.78156	1.86973	8.09669	1.97077	6.59794	1.3656	2.65004	2.27282
Xab2	995.106	1.5281	0.282036	5.41811	6.02324e-08	2.01707e-06	74.724	25.6732	88.8914	26.4844	69.8753	24.7682	65.4052	25.7668
Tro	10103.7	1.52774	0.126303	12.0958	1.1115e-33	1.8039e-31	757.67	261.697	756.438	255.889	856.036	281.688	660.536	247.515
Herc1	12633.9	1.52707	0.150177	10.1685	2.74111e-24	3.12908e-22	951.518	323.13	912.687	340.598	1214.46	317.515	727.407	311.277
Pex5	2101.12	1.52601	0.205192	7.43699	1.03004e-13	6.10966e-12	157.517	54.4668	129.203	48.4741	169.913	60.3541	173.436	54.5723
Akap8l	1414.15	1.52511	0.251233	6.07051	1.27502e-09	5.28762e-08	105.697	36.9778	82.5174	29.0084	111.599	47.3139	122.973	34.611
Acaa2	353.218	1.52472	0.501491	3.04038	0.00236279	0.0248602	27.3822	8.25426	48.9247	8.88577	14.3898	8.83622	18.8322	7.04079
Sema3f	262.146	1.5244	0.52442	2.90682	0.00365119	0.0346236	19.7537	6.69448	26.1851	6.915	17.9087	6.07825	15.1672	7.0902
Satb2	261.886	1.52365	0.56242	2.70909	0.00674685	0.0554451	20.0172	6.40478	30.3195	6.81127	10.054	7.0422	19.6779	5.36088
A3galt2	29.0857	1.52345	1.80868	0.842298	0.399621	0.647254	2.61112	0.323356	6.8908	0.311175	0.942563	0.214211	0	0.444682
Neb	126.105	1.52329	0.731585	2.08217	0.0373267	0.176028	9.45944	3.26344	11.1976	2.9043	9.17428	3.42738	8.00649	3.45863
Dnmbp	630.505	1.52304	0.34157	4.45893	8.23684e-06	0.000187795	47.219	16.3932	48.7524	15.697	42.6667	16.3872	50.2379	17.0955
Ifitm7	21.6441	1.52009	1.63168	0.93161	0.351538	0.607642	1.62262	0.561073	1.37816	0.587775	2.13648	0.428423	1.35321	0.667022
Kifap3	8904.87	1.51804	0.136951	11.0845	1.49101e-28	2.03652e-26	666.046	232.374	740.934	235.421	618.321	250.601	638.884	211.1
Nefl	22396.3	1.51691	0.111064	13.658	1.80871e-42	3.79268e-40	1674.97	584.62	1505.99	568.758	1856.72	640.465	1662.19	544.636
Gfap	5573.65	1.51691	0.16827	9.01476	1.97309e-19	1.698e-17	418.767	143.563	438.6	142.034	312.617	141.54	505.086	147.115
Ints1	3494.86	1.5153	0.237628	6.37678	1.80851e-10	8.1591e-09	266.449	86.151	134.715	82.4959	372.564	89.8617	292.068	86.0953
Ysk4	325.822	1.5151	0.496468	3.05177	0.00227498	0.0241256	25.0932	7.77934	43.5843	8.98949	17.0918	6.96187	14.6034	7.38665
Syde2	286.51	1.51493	0.601505	2.51857	0.0117833	0.0822841	23.138	5.76823	48.9247	5.6703	7.35199	5.40884	13.1374	6.22554
Gcn1l1	3908.81	1.51369	0.196908	7.68732	1.50245e-14	9.39849e-13	294.162	100.201	299.405	103.621	374.574	97.2252	208.507	99.7569
Wdr81	1111.49	1.51118	0.314811	4.80028	1.58447e-06	4.20491e-05	84.1459	27.9933	123.69	25.3435	68.3044	29.5344	60.4434	29.1019
Tfec	9.33258	1.50986	3.28355	0.459826	0.645641	0.818836	0.900671	0.0409009	0	0.06915	2.70201	0.0535529	0	0
Ash1l	7815.18	1.50945	0.13889	10.868	1.6384e-27	2.15863e-25	584.278	204.203	662.895	204.615	561.453	203.367	528.485	204.628
Mll3	6960.86	1.5085	0.13686	11.0222	2.98685e-28	4.04257e-26	519.439	182.848	541.617	185.944	492.332	166.175	524.369	196.426
Ikbkap	3285.08	1.50733	0.185398	8.13024	4.2843e-16	3.00871e-14	246.369	85.0654	229.292	78.9347	316.701	93.7978	193.114	82.4637
Hdac6	2233.45	1.50667	0.197576	7.62579	2.42539e-14	1.49211e-12	166.64	58.6949	163.657	59.2615	173.934	61.8803	162.329	54.9429
Nod1	99.4542	1.50658	0.84408	1.78488	0.0742806	0.264907	7.512	2.52202	11.7144	2.0745	4.90133	2.00823	5.92029	3.48334
Plekhg1	1364.36	1.50573	0.241824	6.22653	4.76875e-10	2.05789e-08	101.856	35.7952	101.812	34.7479	111.851	38.3974	91.9055	34.2405
Cecr2	244.75	1.50403	0.557311	2.69873	0.0069604	0.0566265	18.716	5.97712	30.6641	7.12245	9.86549	5.59627	15.6183	5.21266
Atrx	8841.59	1.50212	0.159426	9.4221	4.42142e-21	4.11413e-19	663.826	228.21	481.839	219.067	859.366	231.857	650.274	233.705
AI197445	69.4527	1.50128	1.01546	1.47842	0.139296	0.37624	5.63594	1.37121	12.748	1.69417	2.07364	0.937175	2.0862	1.48227
Snd1	2012.08	1.49645	0.207358	7.21675	5.32457e-13	3.0607e-11	149.768	53.2328	155.904	58.9503	144.715	51.7588	148.684	48.9891
Spn	12.4214	1.49371	3.27758	0.455737	0.648579	0.820605	1.18406	0.06915	0	0.20745	0	0	3.55218	0
Shpk	84.4971	1.48885	0.9576	1.55477	0.120001	0.346505	6.83354	1.69145	15.1598	1.76332	3.14188	1.28527	2.19897	2.02577
Iqca	71.3771	1.48846	1.27412	1.16823	0.242714	0.504825	6.20093	1.00037	9.13032	0.726075	0	0.348094	9.47247	1.92695
Gli3	409.607	1.48708	0.435558	3.4142	0.000639688	0.00880192	30.9187	10.4069	43.4121	12.3087	31.9215	9.74662	17.4226	9.16538
Fmo5	123.691	1.48615	0.807493	1.84045	0.0657016	0.247365	9.5381	2.94115	11.0253	3.00802	3.26755	3.32028	14.3215	2.49516
Trim12c	167.645	1.4861	0.715697	2.07644	0.0378537	0.177669	13.0968	3.81706	24.8069	3.14632	5.96956	4.2039	8.51395	4.10095
Prep	1441.52	1.48521	0.268973	5.52176	3.35623e-08	1.14342e-06	108.336	37.1007	154.354	37.0989	89.2921	39.7898	81.3618	34.4134
Mphosph8	1652.35	1.48423	0.225197	6.5908	4.37452e-11	2.08743e-09	122.905	43.8027	115.421	39.1043	143.458	48.9473	109.836	43.3565
Zfml	4453.43	1.48065	0.166278	8.90466	5.355e-19	4.47894e-17	331.659	117.652	301.3	119.941	402.286	120.066	291.391	112.949
Cd300lg	97.1341	1.47753	1.1253	1.31301	0.18918	0.442992	8.93172	0.868232	24.4624	0.34575	0.75405	1.09783	1.57875	1.16111
1700029G01Rik	84.6506	1.47453	0.942817	1.56396	0.117828	0.342621	6.7494	1.79107	14.1261	1.76332	2.5135	1.95468	3.60856	1.6552
F830016B08Rik	73.1177	1.47423	0.981002	1.50278	0.132896	0.366332	5.88629	1.49062	1.55043	0.864374	2.57634	1.28527	13.5321	2.32223
Lama2	239.039	1.47346	0.564226	2.61147	0.0090153	0.06834	18.0117	6.10513	27.5632	5.91232	13.4472	7.0422	13.0246	5.36088
Sf3b3	2605.57	1.4729	0.213151	6.91013	4.84207e-12	2.60248e-10	194.795	68.0832	220.85	69.5303	232.499	69.9936	131.036	64.7259
Top2a	199.974	1.47245	0.664251	2.21671	0.0266426	0.143352	15.2127	4.9628	10.1639	5.70487	25.8891	3.42738	9.58524	5.75616
Wfikkn2	42.0697	1.47241	1.24461	1.18303	0.236797	0.499131	3.35217	0.89228	7.06307	1.00267	1.69661	0.883622	1.29683	0.790545
Actn3	54.9482	1.47201	1.0896	1.35097	0.176706	0.428068	4.25321	1.29057	3.4454	1.14097	7.79185	1.76724	1.52236	0.963477
Tbx2	103.124	1.47068	0.861621	1.70688	0.087845	0.289831	8.17301	2.2313	16.7102	2.17822	3.0162	1.84757	4.79262	2.66809
Gtf3c1	4974.65	1.4647	0.151925	9.6409	5.37175e-22	5.29633e-20	368.498	133.399	375.377	127.72	384.88	136.131	345.238	136.344
Gigyf1	1668.83	1.46464	0.234658	6.2416	4.33112e-10	1.87447e-08	124.224	44.1458	145.396	43.8065	137.74	48.7331	89.5374	39.8978
Prss42	31.612	1.46431	1.37167	1.06753	0.285731	0.548544	2.34361	0.845744	2.41178	0.968099	2.70201	0.803293	1.91705	0.76584
Sec23b	1080.99	1.463	0.279825	5.22828	1.71093e-07	5.26892e-06	79.9177	29.1445	75.1098	32.5005	77.9814	30.2038	86.6618	24.7292
Scara5	65.1402	1.46288	1.04286	1.40276	0.160689	0.407542	5.10008	1.47197	8.09669	1.41757	5.90673	1.71369	1.29683	1.28464
4732416N19Rik	11.4799	1.45767	2.41324	0.604031	0.545823	0.757971	0.964526	0.193689	0	0.1383	1.82229	0.294541	1.07129	0.148227
Ephb4	123.238	1.45724	0.964061	1.51156	0.130645	0.363151	10.4952	1.93844	24.4624	1.7979	6.34659	1.79402	0.676605	2.22341
Usp19	3083.58	1.45667	0.184294	7.90406	2.69967e-15	1.80236e-13	228.382	82.723	270.981	85.6768	207.238	88.2551	206.928	74.2371
Snx9	576.287	1.45353	0.384282	3.78246	0.000155284	0.00263323	43.0266	15.1154	59.7777	13.9683	31.3559	15.0484	37.9463	16.3297
Vps8	1701.65	1.45253	0.225212	6.44961	1.12138e-10	5.16874e-09	125.732	45.9493	116.11	48.9582	126.555	43.4581	134.532	45.4316
Exoc1	1353.59	1.45209	0.286058	5.0762	3.85053e-07	1.12405e-05	101.622	34.9427	150.047	35.5085	65.2253	34.7826	89.5938	34.5369
Nbr1	3385.38	1.44922	0.192607	7.52424	5.3029e-14	3.19634e-12	251.036	90.5186	186.396	90.0678	288.738	96.529	277.972	84.9589
T	14.5556	1.44784	3.09827	0.467306	0.640281	0.815989	1.43558	0.0329394	4.30675	0	0	0	0	0.0988181
Dnahc9	427.333	1.447	0.450525	3.2118	0.00131905	0.0159271	32.0085	11.1055	47.5465	9.64642	21.3019	10.5767	27.177	13.0934
Pcnt	1873.76	1.44679	0.27853	5.19438	2.054e-07	6.2281e-06	141.785	47.2607	65.2904	42.0432	155.334	51.4911	204.729	48.248
Obfc1	270.323	1.44675	0.516782	2.79953	0.00511767	0.0453793	19.9667	7.30642	17.9161	6.81127	23.9411	6.56022	18.0428	8.54777
Gtf3c3	1015.78	1.44511	0.313404	4.61103	4.00682e-06	9.84383e-05	75.7194	26.7634	103.879	26.2078	51.841	29.106	71.4382	24.9763
Mycbp2	17452.4	1.44417	0.153756	9.39264	5.85168e-21	5.37777e-19	1294.83	465.955	1038.79	484.153	1678.33	440.151	1167.37	473.561
Cc2d2a	811.361	1.44373	0.336612	4.289	1.79478e-05	0.000381724	60.8477	21.0112	92.509	21.8168	44.3633	19.6003	45.6708	21.6165
Exo1	48.6331	1.44296	1.23007	1.17307	0.240768	0.502672	4.10976	0.796882	10.1639	0.829799	1.31959	0.696187	0.845756	0.864659
Tnxb	89.664	1.44212	0.971565	1.48433	0.137723	0.373822	6.82944	2.21684	1.7227	3.1809	7.0378	1.41915	11.7278	2.05048
Triobp	868.205	1.44169	0.325707	4.42632	9.58534e-06	0.000215569	64.7534	22.8405	52.3701	22.8541	49.1389	23.1616	92.7513	22.5058
Ptpn23	2835.27	1.43966	0.211316	6.81284	9.56882e-12	4.91244e-10	210.041	76.0123	152.115	78.9692	241.422	75.9915	236.586	73.076
Dusp27	55.3782	1.43915	1.10536	1.30198	0.192923	0.44781	4.2972	1.28997	5.85718	1.27927	5.90673	1.55303	1.12768	1.03759
Dmxl2	11497.7	1.43365	0.137984	10.3899	2.75536e-25	3.3082e-23	849.774	310.241	1017.43	315.428	857.544	316.792	674.35	298.505
Ehhadh	129.796	1.43332	0.79231	1.80904	0.0704442	0.257368	9.84179	3.25343	3.61767	3.52665	11.2479	3.93613	14.6598	2.29752
Ddx3x	11577.8	1.43217	0.142865	10.0246	1.18788e-23	1.26323e-21	850.646	317.449	943.523	295.236	818.647	381.805	789.767	275.307
Ccdc39	530.291	1.43207	0.391719	3.65587	0.000256309	0.00405519	39.3604	14.1412	52.3701	13.2076	28.7796	14.2451	36.9314	14.9709
Copa	7045.89	1.43067	0.140969	10.1489	3.35265e-24	3.67017e-22	518.954	191.913	601.05	200.95	497.862	205.563	457.949	169.226
Cutc	144.618	1.429	0.737029	1.93886	0.0525186	0.216412	10.9706	3.62002	14.9875	3.49207	4.33579	3.90936	13.5885	3.45863
Socs1	101.73	1.42891	0.83098	1.71955	0.0855138	0.285711	7.75384	2.50978	13.6093	2.73142	5.59254	2.30277	4.05963	2.49516
Spen	6348.38	1.42835	0.150473	9.49242	2.25739e-21	2.18234e-19	467.6	172.894	523.184	172.322	408.193	179.456	471.425	166.904
Dhx29	1278.93	1.42598	0.252976	5.6368	1.73237e-08	6.15549e-07	93.897	35.1352	93.1981	37.0644	94.4448	38.1029	94.0481	30.2383
Eno4	88.7391	1.42539	0.922163	1.54571	0.122176	0.350607	6.89387	2.05909	8.44124	1.83247	1.69661	1.87435	10.5438	2.47045
Mdn1	4069.19	1.42494	0.237398	6.00234	1.94494e-09	7.70113e-08	302.369	108.175	340.406	119.076	385.822	88.5229	180.879	116.927
3110047P20Rik	1417.23	1.42458	0.247782	5.74933	8.95984e-09	3.26946e-07	104.305	38.6807	88.7191	40.6602	117.066	38.1029	107.129	37.2791
Lrrc6	177.097	1.42365	0.656054	2.17001	0.0300058	0.154047	13.1175	4.75001	7.23534	4.87507	15.7094	3.34705	16.4077	6.02791
9130023H24Rik	152.719	1.42046	0.758917	1.8717	0.0612483	0.236941	11.9544	3.45355	19.4665	3.7341	2.63918	3.26672	13.7576	3.35982
Fanci	43.8842	1.41972	1.52094	0.933451	0.350587	0.606994	3.55094	0.876574	0	1.31385	7.10064	0.722964	3.55218	0.592909
Gbf1	3373.02	1.41954	0.171823	8.26169	1.43625e-16	1.038e-14	247.784	92.5235	264.607	98.0201	226.089	91.6022	252.656	87.9481
Rgs12	776.53	1.41814	0.323698	4.38106	1.18103e-05	0.000261376	57.3049	21.0399	47.3743	21.5402	50.3957	20.4572	74.1446	21.1224
Acvrl1	48.4876	1.41685	1.4163	1.00039	0.317121	0.578568	4.07662	0.815332	0	0.6915	6.5351	0.963951	5.69476	0.790545
Bahd1	844.028	1.41669	0.318444	4.4488	8.63514e-06	0.000195677	62.0699	23.0849	51.1642	24.7211	60.4497	24.1523	74.5957	20.3812
Pcx	832.396	1.41614	0.334338	4.23564	2.279e-05	0.000471247	62.2396	21.7416	91.4754	22.7503	59.947	23.4026	35.2962	19.0719
Itpr1	2532.82	1.4157	0.209927	6.74378	1.54319e-11	7.76185e-10	186.663	68.8762	235.149	67.5595	158.225	73.5281	166.614	65.5411
Cer1	49.6083	1.41405	1.12213	1.26015	0.207614	0.464205	3.6102	1.39482	3.27313	1.45215	2.76485	0.830069	4.79262	1.90225
Cdkl5	1769.45	1.41396	0.221535	6.38255	1.74158e-10	7.90508e-09	130.023	48.4986	149.014	48.6124	128.063	50.9823	112.993	45.901
Trrap	6387.88	1.41373	0.179331	7.88337	3.1867e-15	2.09927e-13	471.487	172.992	424.818	184.838	617.567	161.355	372.076	172.783
Arhgef2	1540.49	1.41353	0.241748	5.84713	5.00133e-09	1.88506e-07	113.081	42.34	121.45	44.8783	96.4556	44.3685	121.338	37.7732
Tpp2	2143.26	1.41344	0.215915	6.54627	5.899e-11	2.78807e-09	157.735	58.5004	193.804	57.6711	140.191	62.1213	139.212	55.7087
Acsbg2	30.6673	1.41176	1.43052	0.986888	0.323698	0.583915	2.42727	0.666779	5.1681	0.760649	0.816888	0.696187	1.29683	0.5435
Nfkbia	624.712	1.41057	0.354726	3.97651	6.99329e-05	0.00130471	45.7639	17.2639	39.9667	13.7263	41.7869	20.6982	55.538	17.3673
Msn	511.629	1.408	0.387564	3.63294	0.000280209	0.00438209	37.7184	13.9003	26.1851	13.2422	44.1748	14.9948	42.7953	13.464
Pja2	22985.2	1.40765	0.118369	11.8921	1.3013e-32	2.06103e-30	1684.83	634.174	1856.9	636.18	1547.06	676.051	1650.52	590.29
Son	9499.23	1.40694	0.135859	10.3559	3.93647e-25	4.65128e-23	697.803	260.582	764.19	267.092	768.314	267.363	560.906	247.292
Lat2	19.2729	1.40618	1.75366	0.801853	0.422638	0.665281	1.47493	0.469526	1.03362	0.656925	0.628375	0.455199	2.7628	0.296454
Rad50	447.276	1.40437	0.419789	3.34542	0.000821578	0.0108341	33.0225	12.1035	22.3951	12.3433	42.7295	12.1833	33.943	11.7841
4932418E24Rik	164.339	1.40212	0.658396	2.1296	0.0332047	0.163918	12.3603	4.22002	21.5338	5.2554	7.5405	3.10607	8.00649	4.29859
Rbm6	2188.69	1.40088	0.210507	6.65476	2.83767e-11	1.38971e-09	159.972	60.847	172.442	55.9077	154.392	70.8504	153.082	55.7828
Ptpn14	475.56	1.39983	0.428433	3.26734	0.00108565	0.0136628	35.2443	12.7354	47.0297	13.5188	37.9539	10.9516	20.7492	13.7357
Synpo2	507.413	1.39863	0.384708	3.63555	0.00027739	0.00434256	36.8462	14.3471	31.3532	10.7182	40.8444	19.6003	38.341	12.7228
Reln	1536.83	1.39683	0.26741	5.22356	1.75519e-07	5.37682e-06	113.16	41.892	127.824	37.2718	134.409	43.8866	77.2458	44.5176
1700007J10Rik	107.025	1.39651	0.808861	1.72651	0.084255	0.283413	8.12267	2.67521	10.5085	2.86972	2.63918	1.8208	11.2204	3.33511
Myo1b	704.474	1.39554	0.35196	3.96504	7.33826e-05	0.00135886	51.7246	19.3505	57.0214	18.0481	37.7653	21.796	60.387	18.2072
Card11	34.6439	1.39418	1.32148	1.05502	0.291418	0.554624	2.49674	0.998518	1.89497	0.6915	2.32499	0.722964	3.27026	1.58109
Pygb	4395.01	1.39397	0.154886	8.99999	2.25729e-19	1.92037e-17	321.335	122.082	355.221	131.35	323.425	124.243	285.358	110.652
Mthfd1l	539.81	1.39393	0.412138	3.3822	0.000719078	0.00970219	40.2075	14.2544	60.4668	13.2422	35.6289	14.9948	24.5269	14.5263
Dnase1l2	29.6989	1.39322	1.6344	0.852439	0.393971	0.64321	2.44567	0.550675	2.75632	0.449475	4.5243	0.535529	0.0563838	0.667022
Hspa2	647.335	1.39064	0.352049	3.95014	7.81054e-05	0.0014356	47.36	17.9502	58.3996	16.596	43.9863	21.3944	39.6942	15.8603
Ptprz1	3947.54	1.39032	0.166541	8.34823	6.92934e-17	5.13254e-15	288.681	109.59	237.044	97.6397	327.572	109.757	301.428	121.373
Kdm5b	3030.35	1.38998	0.179362	7.74954	9.22288e-15	5.89314e-13	221.328	84.4074	235.838	82.9454	212.139	89.2458	216.006	81.0309
Stap2	22.4904	1.38938	1.99966	0.694811	0.487174	0.715009	1.76869	0.500393	3.4454	0.172875	0	0.883622	1.86066	0.444682
Ddx4	46.3913	1.38928	1.25758	1.10473	0.269278	0.532651	3.84036	0.840109	1.20589	1.00267	1.06824	0.776516	9.24694	0.741136
Trf	236.71	1.38865	0.548384	2.53225	0.0113333	0.0800609	17.4548	6.4271	16.5379	5.84317	11.7506	6.05147	24.0759	7.38665
Plcb3	331.698	1.38736	0.464186	2.98879	0.00280081	0.028296	24.3007	9.1646	28.9414	9.95759	25.0722	8.56846	18.8886	8.96775
Vcp	13760.8	1.38571	0.143954	9.62601	6.20925e-22	6.08179e-20	1006.85	381.49	1247.06	367.739	959.089	439.589	814.407	337.143
5031425F14Rik	9.96694	1.38453	3.24024	0.427293	0.669166	0.833546	0.976197	0.0293759	2.92859	0.034575	0	0.0535529	0	0
Ppp6r3	2396.14	1.38302	0.201456	6.86513	6.64287e-12	3.48236e-10	175.475	66.2734	217.577	72.5037	138.682	62.9246	170.166	63.3918
Hoxb9	8.84181	1.38292	2.60439	0.530997	0.595421	0.790334	0.805039	0.0870199	2.23951	0.034575	0.0628375	0.0535529	0.112768	0.172932
Prom2	9.65946	1.38178	3.22158	0.428914	0.667986	0.832634	0.826962	0.147589	0	0	0	0.294541	2.48089	0.148227
Zfhx2as	22.2714	1.37999	1.61144	0.856372	0.391792	0.641482	1.67439	0.572598	2.58405	0.62235	0.691213	0.428423	1.7479	0.667022
Prickle1	1541.57	1.37916	0.233071	5.91734	3.27187e-09	1.26196e-07	112.283	43.2477	105.774	46.1576	136.295	49.6167	94.7811	33.9687
Lama1	379.25	1.37845	0.471274	2.92495	0.00344515	0.033127	28.2899	9.97295	12.9203	8.88577	34.6235	10.9783	37.326	10.0547
Tns3	2875.43	1.37812	0.18732	7.35705	1.88021e-13	1.10207e-11	210.128	79.9769	252.031	82.6342	207.678	84.9616	170.674	72.3349
Slc2a6	250.952	1.37787	0.569504	2.41942	0.0155454	0.0995868	18.6573	6.66142	28.9414	5.63572	11.7506	6.96187	15.28	7.38665
Palld	121.327	1.37335	0.742941	1.84854	0.0645249	0.244876	8.83403	3.40674	7.57988	3.76867	9.11144	3.23995	9.81077	3.21159
Cc2d1b	500.659	1.37239	0.434878	3.15579	0.00160061	0.0184585	37.4788	13.0331	57.0214	13.7954	17.4688	12.8527	37.9463	12.4511
Aldh1a7	35.9909	1.37137	1.34173	1.02209	0.306738	0.56899	2.84407	0.787083	0.68908	0.5532	6.09524	1.0175	1.7479	0.790545
Sorl1	1605.76	1.36999	0.24355	5.6251	1.85404e-08	6.57213e-07	117.202	44.8047	144.19	42.4235	105.756	48.7331	101.66	43.2576
Dctn1	15628.9	1.36914	0.121349	11.2827	1.59797e-29	2.2444e-27	1137.46	439.35	1244.82	424.097	1188.07	489.071	979.499	404.883
Rfc1	1166.01	1.36788	0.270924	5.04894	4.4426e-07	1.2843e-05	84.8616	32.7781	82.6897	34.0218	75.028	34.5684	96.8673	29.7443
Blm	208.47	1.36728	0.579907	2.35775	0.018386	0.111393	15.2622	5.77057	11.0253	5.63572	20.0452	6.26568	14.7162	5.41029
5330411J11Rik	18.68	1.3664	2.02612	0.674395	0.50006	0.724687	1.51546	0.369183	0	0.518625	1.44526	0.267764	3.10111	0.321159
Ddx46	3274.04	1.3645	0.189768	7.19038	6.46122e-13	3.67155e-11	238.526	91.7955	192.081	83.6714	234.698	103.866	288.798	87.8493
Vps16	1158.97	1.36432	0.258805	5.27164	1.35211e-07	4.28304e-06	84.1903	32.7396	85.9628	34.333	85.5847	33.5241	81.0235	30.3619
Cd36	56.0281	1.36396	1.43929	0.947663	0.343301	0.600839	4.74959	0.903134	8.44124	0.864374	0	0.856846	5.80753	0.988181
Pspn	14.729	1.36384	2.22624	0.612621	0.540127	0.753859	1.28497	0.201052	3.10086	0.34575	0.75405	0.133882	0	0.123523
Hs3st3a1	23.7253	1.36318	1.80486	0.755279	0.450081	0.686827	1.98487	0.408793	0	0.242025	3.07904	0.589081	2.87557	0.395273
Fndc1	466.458	1.36227	0.425207	3.20378	0.00135637	0.016272	33.899	13.1624	42.3784	9.88844	28.0255	13.7631	31.293	15.8356
Ccdc42	62.3647	1.36159	1.38125	0.985765	0.324248	0.584304	5.34158	0.950452	9.99167	1.03725	0	0.776516	6.03306	1.03759
Jup	669.521	1.36123	0.360579	3.77512	0.000159928	0.00269346	49.0132	18.5354	51.3365	18.2556	33.6809	19.761	62.0221	17.5896
Camsap1	7464.3	1.36062	0.161404	8.42988	3.46025e-17	2.60183e-15	542.611	210.468	602.256	194.104	454.692	234.106	570.886	203.195
Pcm1	8874.58	1.35856	0.126923	10.7037	9.77558e-27	1.23338e-24	644.197	251.167	610.008	238.464	692.721	268.46	629.863	246.576
Ubr1	2913.67	1.35745	0.198103	6.85224	7.27003e-12	3.78448e-10	212.454	81.5097	166.585	80.9054	265.426	82.4446	205.35	81.1791
Erc2	7999.42	1.35588	0.13341	10.1633	2.89085e-24	3.21186e-22	580.024	227.045	563.84	219.067	589.165	248.003	587.068	214.065
Dock10	1378.47	1.35585	0.28129	4.82011	1.4348e-06	3.85584e-05	100.927	38.148	68.0467	40.6602	134.032	36.9247	100.701	36.8592
Kif1b	23930	1.35369	0.11497	11.7743	5.29845e-32	8.1323e-30	1736.66	677.652	1501.16	646.621	1868.41	648.016	1840.42	738.32
Plekha6	6254.2	1.35207	0.145899	9.26717	1.91142e-20	1.73519e-18	453.677	177.315	492.348	171.25	418.121	181.464	450.563	179.231
Olfml2b	104.054	1.35153	0.853723	1.58311	0.113397	0.335571	8.1161	2.38205	17.0547	2.9043	4.58714	1.8208	2.70642	2.42104
Fam123b	1193.51	1.35091	0.299445	4.51139	6.44052e-06	0.000150292	87.4587	32.9561	71.4921	34.2984	66.6706	34.3809	124.213	30.1889
Otof	548.71	1.3499	0.382197	3.53194	0.000412517	0.00609281	40.3379	15.0219	59.7777	16.354	30.2248	14.7538	31.0111	13.9581
Paox	253.392	1.34972	0.610379	2.21128	0.0270164	0.144632	19.2835	6.2815	32.9036	6.56925	6.28375	6.66733	18.663	5.60793
Fam115a	6171.2	1.34871	0.142241	9.48187	2.49774e-21	2.38374e-19	447.565	175.053	460.995	174.569	492.709	185.266	388.992	165.323
Plscr3	211.703	1.34685	0.618462	2.17774	0.0294252	0.152308	15.9207	5.43823	10.1639	5.8086	9.23712	5.19463	28.361	5.31147
Hk1	9821.71	1.34682	0.124934	10.7802	4.26767e-27	5.47733e-25	711.18	279.742	727.497	283.411	706.545	289.721	699.497	266.093
Ccdc164	947.648	1.34674	0.339101	3.9715	7.14213e-05	0.00132749	70.0338	25.5753	109.219	25.7238	43.4836	28.2491	57.3987	22.7529
Apc2	4190.49	1.34644	0.188264	7.15185	8.56175e-13	4.792e-11	305.353	117.429	249.447	117.14	400.086	114.416	266.526	120.731
Topors	1567.84	1.34299	0.235962	5.69156	1.25882e-08	4.51596e-07	113.475	44.7063	118.694	46.9528	101.294	46.7249	120.436	40.4413
Notch3	273.005	1.34298	0.52503	2.55791	0.0105302	0.0759563	20.0361	7.50764	27.5632	7.12245	12.1905	6.82799	20.3545	8.57247
Plod1	130.34	1.34102	0.774888	1.7306	0.0835235	0.281972	9.96551	3.18463	2.41178	2.0745	10.6824	4.39133	16.8024	3.08807
Lrch3	1906.18	1.33933	0.240139	5.57733	2.44241e-08	8.51583e-07	139.503	52.8137	198.972	55.0779	102.991	49.1615	116.545	54.2017
Slc35a2	181.494	1.33893	0.639924	2.09232	0.0364098	0.173462	13.2002	5.11094	17.227	4.11442	13.0702	5.14107	9.30332	6.07731
Arid1a	7194.48	1.33891	0.134629	9.94515	2.64782e-23	2.73755e-21	520.474	205.384	529.558	207.415	561.453	214.881	470.41	193.856
Cdhr2	177.299	1.33888	0.632692	2.11617	0.0343306	0.167469	13.1472	4.74067	21.1892	5.70487	11.3736	4.71265	6.87882	3.8045
Lrp4	260.26	1.33885	0.516948	2.58992	0.00959984	0.0711411	18.8104	7.44756	19.9833	7.0533	18.3486	6.98865	18.0992	8.30072
Peg10	17564.4	1.33784	0.136314	9.81434	9.76728e-23	9.8922e-21	1276.35	495.742	1059.98	509.186	1650.87	521.23	1118.2	456.811
Ccdc114	78.6489	1.3371	1.0862	1.23099	0.218325	0.478567	6.23845	1.69651	13.2648	0.726075	4.21011	2.11534	1.24044	2.24811
4921528I01Rik	17.0623	1.33583	2.68192	0.498085	0.618424	0.803412	1.66528	0.0561524	4.99583	0.034575	0	0.133882	0	0
Col11a1	158.076	1.33541	0.681521	1.95946	0.0500588	0.210055	11.7577	4.19075	15.6766	4.25272	14.5783	4.71265	5.01815	3.60686
Anxa6	1252.44	1.32836	0.274045	4.84723	1.25196e-06	3.38894e-05	91.8338	34.5258	138.85	39.9687	61.2666	30.9	75.3851	32.7088
Clca2	33.6577	1.32654	1.64319	0.807299	0.419494	0.662575	2.87942	0.516336	0	0.62235	1.75945	0.481976	6.87882	0.444682
Swap70	356.994	1.32654	0.536227	2.47383	0.0133673	0.0896453	27.7907	8.22673	58.055	9.02407	14.8297	7.57773	10.4874	8.07838
Setd2	6069.74	1.32499	0.174096	7.61073	2.72563e-14	1.66992e-12	441.288	171.093	365.04	167.308	598.025	173.163	360.8	172.808
Kbtbd7	1020.28	1.32402	0.298143	4.4409	8.95828e-06	0.000202384	74.1164	28.8205	87.3409	31.6015	50.2072	28.3027	84.8012	26.5574
Zfp58	132.898	1.32378	0.736641	1.79704	0.0723288	0.260923	9.79669	3.61154	15.6766	3.35377	6.15808	3.13284	7.55542	4.348
Pcdhb15	82.7707	1.32352	0.948503	1.39537	0.162903	0.410432	6.26023	2.09057	9.8194	1.55587	7.10064	2.8383	1.86066	1.87754
Azi1	1544.53	1.32351	0.253994	5.2108	1.88033e-07	5.73655e-06	111.753	44.0766	124.379	38.6894	126.303	47.3675	84.5756	46.1728
Mcm4	323.396	1.31995	0.536631	2.4597	0.0139054	0.0921988	24.2326	8.39509	34.9708	9.47354	29.1566	7.65806	8.57033	8.05368
3830408C21Rik	142.716	1.31971	0.729734	1.80849	0.0705308	0.257368	10.6179	3.78083	17.0547	4.11442	4.64998	4.01646	10.1491	3.21159
Ccr4	37.9376	1.31862	1.26336	1.04374	0.296608	0.558989	2.73185	1.09572	2.41178	0.933524	2.5135	1.04428	3.27026	1.30934
Heatr5b	2491.57	1.31549	0.242851	5.41684	6.06617e-08	2.02496e-06	182.545	68.8319	214.304	73.8521	234.321	68.387	99.0099	64.2565
Rusc2	6020.39	1.31422	0.158681	8.28214	1.20979e-16	8.8291e-15	433.106	174.296	408.797	179.755	411.146	188.212	479.375	154.922
2310021P13Rik	2649.16	1.31409	0.202996	6.47344	9.57958e-11	4.42922e-09	191.156	76.12	151.598	78.5543	221.314	78.1872	200.557	71.6184
Irs2	3353.32	1.31266	0.187748	6.99157	2.71824e-12	1.48239e-10	240.715	97.6042	263.573	102.688	220.183	110.774	238.391	79.351
1700030K09Rik	381.23	1.31259	0.52315	2.50901	0.0121069	0.0836802	28.7948	9.6678	35.1431	9.26609	8.67158	9.23787	42.5697	10.4994
Aldh2	1168.73	1.31197	0.302482	4.33734	1.44217e-05	0.000312078	85.5179	32.3959	128.686	33.1574	56.9936	34.1132	70.8744	29.9172
Ewsr1	3928.69	1.31157	0.222567	5.89294	3.79394e-09	1.44967e-07	282.806	113.564	270.12	101.823	220.937	142.397	357.36	96.4712
Tns1	1310.56	1.31108	0.253004	5.18206	2.19446e-07	6.60022e-06	94.2853	37.9382	104.051	37.583	85.2077	41.1018	93.597	35.1298
Ahnak	736.953	1.31023	0.323897	4.04522	5.22735e-05	0.000999035	53.3984	20.9534	31.87	15.6279	54.8572	19.761	73.468	27.4714
Myt1l	12564.4	1.30916	0.131603	9.9478	2.57826e-23	2.68427e-21	903.998	363.637	1013.81	347.79	829.141	383.546	869.043	359.574
Wwp2	1186.95	1.30865	0.277371	4.71806	2.38105e-06	6.08781e-05	85.5663	34.1858	96.299	34.4021	66.8591	36.9782	93.5407	31.1771
Gldc	134.298	1.30799	0.753875	1.73502	0.082737	0.280824	10.1928	3.35667	19.6388	3.4575	6.59794	4.04324	4.34155	2.56927
Gli2	221.637	1.30272	0.735153	1.77204	0.0763883	0.26831	17.1955	5.1657	2.58405	6.15435	30.7904	4.84653	18.212	4.49622
Acly	5526.6	1.30109	0.157972	8.23623	1.77721e-16	1.27207e-14	397.12	160.464	380.545	159.01	357.545	168.397	453.269	153.983
Urb2	448.658	1.3	0.428324	3.03507	0.00240478	0.0251598	32.6994	12.5661	39.9667	13.1731	39.5248	12.3707	18.6066	12.1546
Pcdhga2	67.8318	1.29933	1.1229	1.15712	0.247222	0.510083	5.04973	1.79387	5.51264	0.898949	8.73442	1.74047	0.90214	2.7422
Flii	2031.65	1.29845	0.212521	6.10974	9.97932e-10	4.2208e-08	146.101	58.8737	156.421	57.4982	162.686	61.9071	119.195	57.2157
Plcg1	2147.24	1.29778	0.210189	6.17433	6.64449e-10	2.84262e-08	154.089	62.548	168.652	56.9796	156.151	67.3963	137.464	63.2683
4930579G18Rik	63.6987	1.29752	1.04237	1.24478	0.213212	0.472225	4.76898	1.65764	5.85718	1.48672	1.57094	1.63336	6.87882	1.85284
Hecw1	3946.46	1.29614	0.169417	7.65055	2.0012e-14	1.23626e-12	283.334	114.828	255.132	119.526	328.515	116.504	266.357	108.453
Fus	2720.88	1.29605	0.233424	5.55237	2.81828e-08	9.66787e-07	193.791	80.7213	221.367	67.4904	169.033	108.712	190.972	65.9611
Vps18	1426.76	1.29563	0.241238	5.37074	7.84121e-08	2.57704e-06	102.3	41.6467	120.589	47.8518	89.6691	41.6373	96.6418	35.451
Ndufs1	3770.68	1.29537	0.179116	7.23203	4.75832e-13	2.74581e-11	270.96	109.468	324.04	109.672	234.887	116.826	253.952	101.906
Shprh	2545.51	1.29529	0.188015	6.88928	5.60736e-12	2.96037e-10	182.465	74.3539	190.186	76.8602	176.95	75.3489	180.259	70.8526
Zfp326	983.707	1.29506	0.316906	4.08657	4.37804e-05	0.000849808	71.384	27.863	100.089	25.8275	64.2199	30.0432	49.8432	27.7185
Mtap1a	57691	1.29502	0.105766	12.2442	1.80414e-34	3.01798e-32	4136.85	1683.64	4065.23	1624.71	4476.17	1671.22	3869.17	1754.99
Ccnjl	184.975	1.29482	0.68498	1.89031	0.0587165	0.231079	14.5763	4.08602	32.3868	4.80592	5.027	3.40061	6.31498	4.05154
Odz1	2824.02	1.2921	0.188829	6.84271	7.77087e-12	4.03111e-10	202.639	82.2791	171.236	80.456	227.158	80.4096	209.522	85.9718
Kif22	129.022	1.29204	0.831996	1.55294	0.120437	0.347368	9.82237	3.19474	9.8194	2.93887	2.45066	3.82903	17.197	2.81632
Dvl2	339.537	1.29203	0.460877	2.80342	0.0050563	0.0449637	24.4358	9.82044	23.2565	8.71289	19.0398	9.85373	31.0111	10.8947
Cat	1220.56	1.29155	0.278872	4.63134	3.63308e-06	9.02993e-05	88.2197	34.9235	115.249	37.8596	60.324	34.9432	89.0863	31.9677
Bclaf1	6614.93	1.29147	0.147241	8.77118	1.76807e-18	1.39275e-16	474.431	192.955	386.919	183.628	562.019	223.664	474.357	171.573
Ppp1r1c	21.7389	1.29112	2.01988	0.639209	0.522687	0.742356	1.92736	0.265894	4.82356	0.103725	0	0.348094	0.958524	0.345863
Pnkp	346.265	1.29104	0.496445	2.60057	0.009307	0.0698896	25.1335	9.80147	31.6977	9.71557	14.327	11.1658	29.3759	8.52306
Tmod1	141.343	1.29029	0.691936	1.86476	0.0622154	0.239003	10.1464	4.11382	10.3362	4.73677	7.98036	3.77548	12.1225	3.8292
Rab3gap2	3008.96	1.28771	0.189652	6.78983	1.12262e-11	5.70431e-10	215.928	87.648	252.548	84.8124	212.328	90.8256	182.909	87.3058
Hspa9	7365.91	1.28767	0.145854	8.82849	1.06097e-18	8.63156e-17	527.18	215.974	526.974	212.705	487.682	234.294	566.882	200.922
Abr	18578.2	1.28609	0.135596	9.48475	2.42954e-21	2.33361e-19	1331.61	542.759	1341.98	587.014	1118.82	544.874	1534.03	496.388
Caskin2	740.168	1.28597	0.342683	3.75265	0.000174975	0.00289447	53.7688	20.9074	68.7358	24.9977	29.5336	17.8867	63.037	19.8377
S1pr4	9.62985	1.28576	2.34788	0.547627	0.583948	0.783041	0.726557	0.245007	0.17227	0.172875	0.879725	0.240988	1.12768	0.321159
Pcdha10	49.824	1.28563	1.4163	0.907733	0.364019	0.61782	4.24611	0.780685	0	0.760649	2.70201	0.642634	10.0363	0.938772
Ppp1r9b	20139.5	1.28554	0.122487	10.4953	9.07584e-26	1.09855e-23	1443.78	588.108	1303.91	544.037	1309.6	615.001	1717.84	605.286
Trp53bp2	1000.52	1.28521	0.285735	4.49792	6.86202e-06	0.000158636	71.8043	29.1388	64.429	28.3169	87.7212	29.1328	63.2626	29.9666
Cpt2	172.081	1.28519	0.785678	1.63577	0.101888	0.316476	13.1591	4.20238	23.9455	4.2873	2.45066	5.35529	13.081	2.96454
Hsd17b4	1843.41	1.28462	0.235552	5.45367	4.93413e-08	1.66198e-06	132.799	53.1848	160.556	50.514	146.16	60.2737	91.68	48.7667
Ppil6	94.3141	1.28394	0.872572	1.47145	0.141171	0.379446	6.9396	2.57583	11.1976	2.2128	3.64458	2.94541	5.97668	2.56927
Tnfrsf1a	74.6562	1.28118	0.949815	1.34887	0.177379	0.428656	5.39217	2.13996	7.92442	1.72875	4.58714	2.8383	3.66494	1.85284
Ctsh	51.24	1.27806	1.51391	0.844213	0.39855	0.646434	4.34208	0.827567	9.13032	0.5532	3.89593	0.990728	0	0.938772
Dcaf15	440.366	1.27731	0.425418	3.00249	0.00267777	0.0273434	31.5457	12.8833	25.1514	14.5215	29.8478	12.9866	39.6378	11.1417
1110031I02Rik	122.3	1.27707	0.768732	1.66127	0.0966591	0.306313	9.06986	3.26911	8.44124	3.00802	3.77025	2.94541	14.9981	3.85391
Incenp	472.009	1.27644	0.402901	3.16813	0.00153422	0.0179009	34.0359	13.5855	23.2565	12.8619	46.3741	15.0484	32.477	12.8464
Prpf40a	1853.56	1.27635	0.237274	5.37923	7.48035e-08	2.46935e-06	133.234	53.7734	89.7527	50.6869	167.525	63.2995	142.425	47.3339
Aff2	1819.2	1.27559	0.213722	5.96842	2.39556e-09	9.3609e-08	129.908	53.6325	146.602	60.1605	123.476	50.661	119.646	50.0761
Cpm	135.443	1.27553	0.78979	1.61503	0.106305	0.323854	10.3638	3.30119	20.1556	3.07717	3.26755	3.61482	7.66819	3.21159
Mocs1	196.569	1.27233	0.612626	2.07684	0.037816	0.177548	14.2811	5.55089	8.78578	5.1171	21.4276	5.40884	12.63	6.12672
Pde4dip	9546.65	1.27199	0.137974	9.21907	2.997e-20	2.7042e-18	681.833	281.336	591.403	278.156	697.371	300.378	756.726	265.475
Thrap3	5475	1.27174	0.176793	7.19334	6.32244e-13	3.60645e-11	394.041	158.338	293.376	159.149	535.501	167.835	353.244	148.03
Jmjd1c	3355.17	1.27091	0.186042	6.83132	8.41384e-12	4.34949e-10	240.028	98.4777	191.737	98.0546	275.354	95.0028	252.994	102.376
Dysf	291.706	1.26925	0.577366	2.19834	0.0279248	0.147689	21.9902	7.44026	37.7272	7.67564	21.3648	7.28319	6.87882	7.36195
Aldh4a1	448.64	1.26585	0.424093	2.98484	0.00283729	0.0285224	32.2923	12.9714	44.618	11.9284	26.2661	13.2008	25.9929	13.7851
Cd74	42.1548	1.26569	1.23292	1.02658	0.30462	0.567181	3.03094	1.22209	4.99583	1.1064	2.0108	1.79402	2.0862	0.76584
Aldh18a1	748.407	1.26482	0.323481	3.91002	9.22897e-05	0.00166749	53.4322	22.0752	44.7902	23.1307	52.4693	20.8856	63.037	22.2094
Coro7	961.748	1.26367	0.280656	4.50257	6.71364e-06	0.000155447	68.5495	28.4821	78.0384	31.4632	67.1105	28.142	60.4998	25.8409
Arhgef3	1130.17	1.26169	0.353828	3.56584	0.000362688	0.00546528	83.5107	30.5132	145.741	31.0829	41.4728	34.5416	63.319	25.9151
Lonp2	1917.26	1.26074	0.213187	5.91378	3.3435e-09	1.28625e-07	136.5	56.9341	128.513	60.0913	150.684	57.9174	130.303	52.7936
Cdc42bpb	8456.36	1.25949	0.156141	8.06637	7.24202e-16	5.01485e-14	603.14	250.029	716.299	233.312	519.98	272.102	573.141	244.674
Hrc	34.3133	1.25855	1.69299	0.74339	0.457246	0.692168	2.99233	0.469564	6.8908	0.311175	0	0.455199	2.0862	0.642318
Cyfip1	1083.39	1.25807	0.268922	4.67821	2.89394e-06	7.31494e-05	77.1738	32.1305	89.7527	35.958	75.405	29.4541	66.3637	30.9795
Ppp1r18	368.401	1.25797	0.47987	2.62148	0.00875496	0.0669804	26.6155	10.5528	14.643	11.3406	28.7796	9.07721	36.4239	11.2406
Supt16h	3936.23	1.25792	0.162424	7.74468	9.5822e-15	6.09657e-13	279.935	117.195	279.078	108.565	286.476	125.18	274.251	117.841
Copb2	3478.09	1.25674	0.189413	6.63493	3.24658e-11	1.56932e-09	249.51	101.398	293.031	105.35	289.053	107.882	166.445	90.9621
Wdr90	159.152	1.25642	0.695169	1.80736	0.0707058	0.257565	11.8643	4.19265	21.017	4.2873	9.61414	4.6591	4.96177	3.63157
Abcc9	108.396	1.25543	0.924847	1.35745	0.174638	0.425744	8.71409	2.22206	18.6052	2.10907	6.40943	2.3831	1.12768	2.174
Chd2	4609.55	1.25428	0.153376	8.1778	2.89061e-16	2.05911e-14	327.567	137.495	301.128	124.643	342.087	150.805	339.487	137.036
Aplp2	6567.98	1.25339	0.142659	8.7859	1.55122e-18	1.23501e-16	466.633	196.016	466.507	175.191	503.014	217.371	430.377	195.487
Gga2	726.003	1.25332	0.332759	3.76646	0.00016558	0.00276747	51.7673	21.4798	62.8786	19.9498	45.1173	22.9474	47.306	21.5424
Rnpepl1	680.396	1.25254	0.331977	3.77297	0.000161314	0.0027109	48.5132	20.1325	61.1559	22.3009	40.4045	17.2708	43.9793	20.8259
Kdm4b	2170.96	1.25205	0.2065	6.06321	1.3343e-09	5.51809e-08	154.655	64.3747	175.716	63.4105	165.954	72.0286	122.296	57.6851
Tmc3	35.06	1.25001	1.32275	0.945008	0.344655	0.602114	2.58583	0.951397	4.65129	1.14097	1.69661	0.74974	1.40959	0.963477
Sgsm1	6410.89	1.24989	0.146346	8.54065	1.33466e-17	1.0138e-15	456.417	190.384	466.68	189.989	522.431	198.226	380.139	182.937
Ppfia3	4793.37	1.249	0.154336	8.09278	5.83191e-16	4.05727e-14	340.302	143.305	352.637	135.188	340.454	154.875	327.815	139.852
Wdr6	17192.8	1.2485	0.112551	11.0927	1.36127e-28	1.87654e-26	1221.5	513.1	1256.19	536.05	1334.86	537.001	1073.43	466.249
Aldh1l1	607.62	1.2483	0.414883	3.00879	0.00262287	0.026912	44.3048	16.9986	57.5382	18.4976	55.3599	15.1555	20.0162	17.3426
Camsap3	1828.88	1.24777	0.252804	4.93574	7.98478e-07	2.22617e-05	131.716	52.8011	187.43	53.0034	119.14	54.4097	88.5789	50.9902
Myo5b	1401.7	1.24262	0.282863	4.39303	1.11781e-05	0.000248388	100.413	41.0062	76.8325	45.7427	141.07	37.9958	83.3352	39.2802
Dhx30	3652.16	1.24222	0.216621	5.73451	9.77965e-09	3.5512e-07	262.879	105.591	385.885	103.517	204.787	112.461	197.963	100.794
Cntn4	635.374	1.24112	0.353087	3.51506	0.000439651	0.00642348	45.1617	18.9418	53.4037	16.838	37.1998	19.038	44.8815	20.9494
Six5	56.8684	1.24097	1.24944	0.993226	0.3206	0.58167	4.74238	0.995118	6.8908	1.17555	0.0628375	0.401646	7.27351	1.40816
Huwe1	17285.5	1.24057	0.124362	9.97545	1.95206e-23	2.04664e-21	1227.25	516.703	1256.54	510.327	1362.32	512.983	1062.89	526.799
Top3b	567.455	1.24041	0.363376	3.41358	0.000641156	0.00881397	40.328	16.9231	45.307	18.221	32.487	16.762	43.19	15.7862
Smarca2	10353.5	1.23991	0.14337	8.64832	5.22626e-18	4.05253e-16	736.515	308.056	565.39	299.523	876.206	342.149	767.947	282.496
Rnf112	2290.87	1.23988	0.212658	5.83038	5.53017e-09	2.05833e-07	162.799	68.3296	187.43	62.9265	167.336	72.939	133.63	69.1233
Insc	62.8555	1.2383	1.1103	1.11529	0.264728	0.527966	4.98914	1.35241	8.26897	1.59045	0.439863	0.910399	6.2586	1.55639
Phka1	843.644	1.2373	0.382802	3.23223	0.00122827	0.0150506	61.5615	23.5545	95.7822	22.8886	59.6956	21.6621	29.2068	26.1127
Cbll1	699.199	1.2373	0.340906	3.62944	0.000284036	0.00443729	49.9925	20.5504	62.8786	22.5775	53.6632	19.6807	33.4356	19.3931
Fbxl12	173.616	1.23613	0.633808	1.95033	0.051137	0.212721	12.2803	5.23591	11.1976	6.43095	10.8709	4.63232	14.7725	4.64445
Piwil1	35.4202	1.2353	1.35386	0.912428	0.361543	0.616204	2.60497	0.96861	2.75632	1.14097	0.942563	1.09783	4.11601	0.667022
Skiv2l	1455.51	1.23307	0.239273	5.15338	2.55833e-07	7.64457e-06	103.081	43.7667	93.5427	44.7054	102.991	44.1276	112.711	42.4671
Mtap1b	129956	1.23071	0.0954896	12.8885	5.22836e-38	9.85315e-36	9195.25	3916.13	9112.05	3785.1	9870.27	4176.48	8603.43	3786.81
1110012J17Rik	2662.56	1.23038	0.211628	5.81387	6.10453e-09	2.2608e-07	189.196	79.4317	206.38	72.1926	142.327	82.873	218.882	83.2296
Wdr19	499.561	1.22907	0.403807	3.04369	0.00233693	0.0246928	35.7316	14.6695	24.9792	15.3859	31.9215	13.6024	50.2943	15.0204
Copg	7331.45	1.2282	0.140859	8.71936	2.79766e-18	2.19219e-16	519.39	220.287	615.004	230.65	496.605	233.169	446.559	197.043
Hbp1	701.419	1.22679	0.36359	3.37411	0.000740539	0.00994152	51.0303	19.7365	84.4124	21.8168	30.2248	17.4315	38.4537	19.9613
Znfx1	1235.97	1.22652	0.292149	4.19827	2.68959e-05	0.00054703	88.4971	36.2015	125.068	34.1947	63.4031	37.0318	77.0202	37.378
Zfp828	1779.08	1.22567	0.219696	5.57891	2.42032e-08	8.45863e-07	125.671	53.8216	119.728	55.4237	127.434	56.6321	129.852	49.4091
Ankfn1	555.133	1.2256	0.363844	3.36847	0.000755874	0.010098	39.2557	16.7521	42.8953	16.7689	35.6289	17.726	39.2431	15.7615
Ddx42	3737.35	1.22485	0.184243	6.64803	2.97037e-11	1.44519e-09	265.432	111.633	331.103	109.879	254.429	118.593	210.762	106.427
Myo1d	217.71	1.22475	0.607432	2.01627	0.0437713	0.194296	15.9483	6.01665	26.3573	6.67297	14.327	5.27496	7.16074	6.10202
Trim56	64.8125	1.22299	1.01059	1.21018	0.22621	0.487312	4.61477	1.92423	4.82356	2.0745	6.0324	1.49948	2.98834	2.1987
Cep76	193.781	1.22275	0.644435	1.8974	0.0577751	0.229279	13.7344	5.81635	9.30259	7.67564	12.5047	5.62305	19.396	4.15036
Frmd4a	5315.7	1.221	0.155755	7.83921	4.53381e-15	2.92205e-13	375.907	160.399	427.402	160.428	367.034	155.571	333.284	165.199
Rpa1	1103.74	1.22019	0.312501	3.9046	9.43803e-05	0.00170319	78.6024	32.7548	98.5385	30.0802	51.9038	37.0318	85.365	31.1524
Vwa2	22.4703	1.21982	2.33155	0.523179	0.60085	0.792923	2.01102	0.256024	0	0	0	0.348094	6.03306	0.419977
Fam83h	191.679	1.21916	0.617295	1.975	0.0482681	0.205848	14.0437	5.29503	23.9455	6.53467	5.78105	3.66837	12.4044	5.68204
Ighmbp2	402.098	1.21846	0.438265	2.78019	0.00543279	0.0474389	28.7707	11.7974	41.5171	12.1704	23.3127	11.4871	21.4822	11.7347
Sema3d	231.332	1.21809	0.569877	2.13747	0.0325597	0.162124	16.5816	6.75763	21.1892	6.60382	18.9141	6.80121	9.64162	6.86786
Ipo4	3026.2	1.21792	0.192884	6.31427	2.71445e-10	1.20276e-08	214.532	90.7844	263.918	91.4508	206.861	90.8792	172.816	90.0233
Kctd10	547.525	1.21777	0.39068	3.11706	0.00182664	0.0203828	38.9308	16.3095	45.6516	14.072	44.866	17.8599	26.2748	16.9967
Umodl1	85.4352	1.21773	1.31619	0.925189	0.354868	0.610404	7.63944	0.980193	20.8447	1.14097	2.07364	0.589081	0	1.21052
Bptf	7330.01	1.21767	0.133926	9.09212	9.71268e-20	8.60729e-18	517.266	222.266	485.457	217.753	524.379	219.861	541.961	229.184
Nipbl	2505.45	1.21705	0.192918	6.30863	2.81516e-10	1.24368e-08	176.879	75.8982	180.884	74.1287	189.455	76.0183	160.299	77.5475
Armc2	428.349	1.21629	0.460074	2.64368	0.00820092	0.0638908	31.2161	12.0004	44.2734	11.4789	13.0074	10.416	36.3675	14.1063
Hcn4	700.101	1.21505	0.345342	3.51839	0.000434178	0.00635599	49.6592	20.9746	60.2945	19.0854	36.6971	21.555	51.9858	22.2835
Pik3c3	1281.71	1.21431	0.252681	4.80569	1.54217e-06	4.1073e-05	90.4269	38.8858	98.883	37.4447	83.7624	40.9947	88.6353	38.2179
Hsph1	7297.59	1.21334	0.137399	8.83079	1.0394e-18	8.50254e-17	515.351	220.909	607.08	238.152	473.921	217.773	465.053	206.802
Ubc	2709.03	1.2129	0.205744	5.89522	3.74175e-09	1.43575e-07	191.306	82.0098	207.069	88.9614	153.889	84.8813	212.961	72.1866
Eif3c	7038.62	1.21259	0.136312	8.89571	5.80479e-19	4.82803e-17	495.757	214.376	488.73	209.87	515.33	235.177	483.209	198.081
Scrn2	131.581	1.212	0.963341	1.25813	0.208346	0.465115	11.2568	2.0185	27.3909	1.34842	0.628375	1.76724	5.75114	2.93984
Arvcf	2252.85	1.21166	0.209736	5.77705	7.60208e-09	2.78768e-07	159.252	68.0399	128.341	64.7935	159.796	72.698	189.619	66.6281
Wdfy3	11159.2	1.21016	0.13379	9.04522	1.49365e-19	1.30809e-17	787.2	338.666	672.715	338.524	863.765	323.111	825.12	354.362
Cherp	2113.46	1.20924	0.210671	5.73993	9.47168e-09	3.44778e-07	148.96	64.268	129.203	66.626	160.424	66.2449	157.254	59.9332
C330027C09Rik	134.687	1.20917	0.783907	1.54249	0.122956	0.351524	10.2177	3.371	20.1556	3.11175	3.39323	3.32028	7.10435	3.68098
Klhl34	375.759	1.20886	0.475353	2.54307	0.0109884	0.0783499	27.1129	10.7977	41.8616	10.2688	23.6897	11.3532	15.7875	10.7712
Acaca	4025.12	1.20845	0.177461	6.80964	9.78402e-12	5.00565e-10	284.569	121.528	348.847	119.457	242.113	120.494	262.748	124.634
Pan2	280.819	1.20837	0.567043	2.131	0.0330889	0.163654	20.7181	7.61395	34.1095	8.50544	7.35199	7.44385	20.6928	6.89256
Stag3	56.6669	1.20721	1.42225	0.848805	0.39599	0.644677	4.7476	0.969574	6.8908	1.07182	7.35199	1.07106	0	0.76584
Ctnna1	1102.05	1.20539	0.274099	4.39766	1.09422e-05	0.00024351	77.6187	33.5676	83.7233	31.1521	68.053	36.175	81.0798	33.3758
Erc1	5697.51	1.2046	0.150424	8.00806	1.16536e-15	7.92232e-14	401.107	173.72	376.41	165.787	381.424	184.838	445.488	170.535
Fryl	2212.57	1.20435	0.236142	5.10012	3.39442e-07	1.00072e-05	156.634	66.5938	197.938	71.0862	160.55	56.6321	111.414	72.0631
Fcgbp	33.0084	1.20373	1.67235	0.719783	0.471658	0.703401	2.77683	0.553419	3.61767	0.62235	4.71281	0.642634	0	0.395273
Dsn1	118.017	1.20369	0.803259	1.49851	0.134001	0.36754	8.93426	2.97258	18.2606	3.21547	5.21551	3.45416	3.32664	2.24811
Qrfp	75.3171	1.20302	0.940493	1.27914	0.200848	0.457734	5.32225	2.27656	3.61767	2.69685	6.59794	2.00823	5.75114	2.12459
Pou2af1	20.6942	1.20099	2.61044	0.460072	0.645464	0.81868	2.0674	0.0204505	0	0.034575	0	0.0267764	6.20221	0
Aff1	456.567	1.2005	0.464809	2.58279	0.00980052	0.07209	33.0444	13.019	48.2356	12.0667	15.2067	13.897	35.6909	13.0934
Sh3bp2	242.395	1.19997	0.532023	2.25548	0.0241032	0.13355	17.058	7.39744	17.0547	7.22617	14.8925	6.96187	19.2269	8.00427
Lgals3bp	120.933	1.19969	0.741595	1.61771	0.105724	0.322546	8.47734	3.72373	8.09669	2.97345	8.48306	4.09679	8.85225	4.10095
Tsc22d1	16703.8	1.19906	0.531201	2.25726	0.0239916	0.13315	1215.47	469.792	1686.7	484.983	491.641	471.212	1468.06	453.18
Cpsf2	1854.54	1.19703	0.23742	5.0418	4.61182e-07	1.33064e-05	131.296	55.8106	95.0931	53.5912	128.628	58.4529	170.166	55.3876
Aldh1b1	424.835	1.19479	0.509914	2.34312	0.0191234	0.115081	32.3908	10.4712	67.8744	10.8911	15.7094	10.7641	13.5885	9.75829
Dhx38	1491.3	1.19368	0.255345	4.67476	2.94301e-06	7.42635e-05	105.405	45.054	72.5257	43.4607	126.806	50.0987	116.884	41.6024
Nup205	862.315	1.19364	0.310282	3.84694	0.0001196	0.00209978	60.5856	26.4141	49.7861	28.8355	65.0997	23.4294	66.8711	26.9773
Aars	5540.66	1.19226	0.153004	7.79232	6.57892e-15	4.22185e-13	389.271	169.731	443.079	166.824	394.494	189.818	330.24	152.55
Camk1g	1096.91	1.19109	0.284818	4.18195	2.89019e-05	0.000582859	77.548	33.1207	82.1728	31.567	54.7315	32.6405	95.7396	35.1545
Fam199x	1600.51	1.18952	0.239566	4.96531	6.85928e-07	1.94146e-05	112.764	48.713	127.135	49.9263	124.607	48.0637	86.5491	48.1491
Hdc	1727.58	1.18768	0.252079	4.71153	2.45868e-06	6.24655e-05	121.351	52.9458	97.6771	62.3041	152.255	50.9288	114.121	45.6046
Lipi	56.7879	1.18735	1.09443	1.0849	0.277966	0.540382	4.21124	1.51814	7.57988	1.34842	1.44526	1.20494	3.60856	2.00107
Gimap1	241.636	1.18732	0.616985	1.92439	0.0543061	0.220943	18.0837	6.29518	17.0547	5.35912	4.77565	5.59627	32.4207	7.93015
Slx4	1581.97	1.18699	0.236764	5.01337	5.3485e-07	1.52838e-05	111.213	48.3939	118.35	47.6097	90.7374	48.7063	124.552	48.8656
H2-Ke6	377.272	1.18645	0.527243	2.25029	0.0244304	0.134861	27.8056	10.2577	40.828	11.7209	8.42023	9.96083	34.1686	9.09127
Frem2	120.874	1.18595	0.760148	1.56015	0.118723	0.34394	8.50711	3.68792	11.8866	3.4575	7.0378	2.8383	6.5969	4.76797
Nr6a1	289.072	1.18576	0.606806	1.9541	0.0506897	0.212045	22.2365	6.9282	6.71853	7.3299	12.0648	6.26568	47.9262	7.18902
Glis1	64.0287	1.18508	1.04332	1.13588	0.256007	0.519821	4.64483	1.81508	7.23534	1.27927	4.83849	2.43665	1.86066	1.72932
Nup133	1060.04	1.18371	0.284732	4.15728	3.22064e-05	0.000644474	74.719	32.2293	55.2987	31.7744	94.3191	34.0328	74.5393	30.8807
GFP	900.401	1.18359	0.29879	3.96128	7.45504e-05	0.00137719	63.5452	27.2971	83.7233	32.293	44.5518	24.4737	62.3604	25.1245
Ddx5	19823.6	1.18083	0.117877	10.0175	1.27714e-23	1.34852e-21	1386.52	613.499	1419.51	602.884	1356.91	679.586	1383.15	558.026
Cacna1f	14.2185	1.1791	2.26029	0.521656	0.60191	0.793155	1.20805	0.226466	0.861351	0.172875	0	0.160659	2.7628	0.345863
Cul9	2067.62	1.1785	0.246447	4.78195	1.73606e-06	4.58272e-05	146.695	61.9093	171.753	61.9929	179.527	63.0853	88.8044	60.6496
Eif5b	3518.18	1.17725	0.174349	6.75223	1.45586e-11	7.34743e-10	245.818	109.135	239.283	100.129	242.301	124.109	255.87	103.166
Prepl	13074.2	1.17715	0.126634	9.29569	1.46252e-20	1.33583e-18	913.94	405.124	976.771	414.727	868.603	441.195	896.445	359.451
Gpr157	172.119	1.17693	0.68028	1.73007	0.0836183	0.282228	12.5732	4.79198	22.5674	4.39102	7.5405	4.52522	7.61181	5.4597
Usp35	448.873	1.17541	0.464246	2.53187	0.0113455	0.0800609	32.4885	12.7987	54.4374	11.8592	25.3235	12.8259	17.7045	13.711
Dnahc5	254.937	1.17529	0.526489	2.23232	0.0255937	0.139269	17.9192	7.8016	13.2648	7.57192	17.6573	6.98865	22.8354	8.84422
6430562O15Rik	56.8243	1.17513	1.06277	1.10573	0.268844	0.532324	4.04588	1.68718	3.27313	1.48672	6.15808	1.8208	2.70642	1.75402
Nat10	936.678	1.17194	0.311945	3.75687	0.00017205	0.00285243	65.7439	28.7584	55.9878	30.1148	57.1193	30.7393	84.1246	25.421
Skiv2l2	1942.01	1.17121	0.257887	4.54155	5.58421e-06	0.000133447	137.3	58.6308	192.77	54.9051	99.5975	64.6115	119.534	56.3757
Msh6	827.085	1.1706	0.303106	3.86204	0.000112446	0.00198824	57.7614	25.6839	52.5424	25.8275	62.272	27.9278	58.47	23.2964
Ap3d1	8444.41	1.17051	0.130048	9.00062	2.24444e-19	1.92037e-17	590.24	261.725	569.87	260.419	648.232	271.781	552.617	252.974
Zfp97	37.9389	1.1703	1.28588	0.910113	0.362763	0.616904	2.75355	1.07414	1.20589	1.00267	2.26215	0.910399	4.79262	1.30934
F3	253.912	1.16807	0.527759	2.21326	0.0268795	0.144158	17.7862	7.83122	14.643	6.7767	16.2749	8.83622	22.4407	7.88075
Bcar3	252.577	1.16786	0.570241	2.04801	0.0405592	0.185913	18.0842	7.39859	23.7733	7.81394	8.5459	7.71161	21.9333	6.67022
Gpr174	64.4089	1.16739	1.02282	1.14134	0.25373	0.517149	4.65076	1.84751	3.78994	1.55587	2.32499	2.03501	7.83734	1.95166
Szt2	1123.43	1.16688	0.301757	3.86696	0.0001102	0.00195084	79.546	33.7983	47.5465	32.8462	104.373	33.1224	86.7182	35.4263
Kremen2	26.6799	1.16555	1.51469	0.769494	0.4416	0.680172	1.93797	0.753799	0.68908	0.795224	2.13648	0.74974	2.98834	0.716431
Ddx3y	627.481	1.16551	0.342318	3.40476	0.000662234	0.00906189	43.897	19.4101	48.7524	21.8514	49.3903	19.9752	33.5483	16.4038
Zfp658	306.275	1.16503	0.517159	2.25276	0.0242743	0.134248	21.9407	8.95957	32.9036	8.57459	11.4364	8.59523	21.4822	9.70888
A830080D01Rik	355.348	1.1637	0.481788	2.41538	0.0157189	0.100118	25.2466	10.6048	32.559	11.6172	13.6357	10.7106	29.5451	9.48654
Cgnl1	618.019	1.16351	0.383979	3.03013	0.00244446	0.0254189	44.0124	18.3401	68.0467	18.5322	29.5965	19.7878	34.3941	16.7003
9830001H06Rik	9790.95	1.16159	0.13166	8.82269	1.11738e-18	9.04108e-17	683.853	303.965	730.598	297.068	744.436	323.807	576.524	291.019
E130003G02Rik	44.6367	1.16111	1.4218	0.816642	0.414133	0.659213	3.72473	0.778704	0	0.4149	3.39323	0.883622	7.78096	1.03759
Slit2	1729	1.16068	0.242087	4.79447	1.63105e-06	4.32084e-05	121.504	52.936	135.404	54.0407	144.589	53.2583	84.5193	51.5089
Mtr	476.593	1.15861	0.446863	2.59277	0.00952072	0.0709077	34.8001	13.2838	61.1559	15.0747	28.5282	12.7456	14.7162	12.0311
Zfp111	360.274	1.15711	0.450162	2.57043	0.0101572	0.0741274	25.2844	11.064	33.4204	11.4443	21.1762	11.2729	21.2567	10.4747
Vars	870.094	1.15695	0.360987	3.20495	0.00135084	0.0162451	62.4525	25.3321	35.8322	25.378	49.0761	26.4819	102.449	24.1363
Rrm1	483.01	1.15563	0.402421	2.87169	0.00408288	0.0377553	33.7248	15.0064	26.1851	15.8353	35.1262	16.0659	39.8633	13.1181
B4galt1	106.232	1.1552	0.848673	1.36119	0.173455	0.424596	7.72093	2.99696	8.26897	3.28462	2.82769	3.18639	12.0661	2.51986
Ninl	282.045	1.155	0.560048	2.06232	0.0391773	0.181704	20.6568	7.79898	38.4162	7.71022	11.9391	7.01542	11.6151	8.67129
Hspa4	9734.53	1.15491	0.131125	8.8077	1.27735e-18	1.02795e-16	677.801	304.325	699.244	298.347	635.224	321.853	698.933	292.773
Tbc1d2	53.7276	1.15465	1.14619	1.00738	0.313752	0.575831	4.11395	1.30667	6.37399	1.55587	5.40403	1.49948	0.563838	0.864659
Sh2d3c	1014.36	1.15389	0.308455	3.74087	0.000183381	0.00301678	71.5327	30.8075	101.639	29.6653	57.3078	32.0246	55.6508	30.7324
Eif3a	12418.6	1.15379	0.143568	8.03651	9.24316e-16	6.34158e-14	871.78	381.144	706.48	351.316	1186.25	415.249	722.614	376.868
5430416O09Rik	21.765	1.15272	1.66597	0.691926	0.488984	0.716112	1.57923	0.616664	3.10086	0.4149	0.565538	0.348094	1.07129	1.087
4930556M19Rik	37.7395	1.15272	1.30498	0.883324	0.377061	0.628328	2.78103	1.02655	0.861351	0.898949	2.57634	1.04428	4.90539	1.13641
Fat1	3401.96	1.15108	0.175368	6.5638	5.24531e-11	2.48701e-09	236.9	106.326	203.106	101.305	259.393	102.206	248.201	115.469
Larp4	2014.84	1.1507	0.259027	4.44241	8.89557e-06	0.000201272	143.59	59.6893	226.191	62.0275	112.731	59.8989	91.8491	57.1416
2610301G19Rik	3490.61	1.1505	0.171885	6.69347	2.17942e-11	1.08883e-09	243.262	108.909	279.422	112.023	240.165	112.675	210.199	102.03
Csmd1	2122.62	1.14803	0.242522	4.73371	2.2045e-06	5.70792e-05	149.072	65.0807	134.371	69.5649	203.405	60.7289	109.441	64.9482
Atp6v0a1	8944.82	1.14797	0.127131	9.02982	1.71953e-19	1.4971e-17	621.732	280.719	582.962	258.655	634.722	295.398	647.511	288.104
Aox1	55.2075	1.14751	1.46079	0.785543	0.432135	0.672565	4.49625	1.07368	6.8908	1.27927	6.59794	0.830069	0	1.1117
Rictor	2324.78	1.1475	0.206546	5.55567	2.76554e-08	9.53086e-07	162.33	72.2192	196.216	75.6155	128.503	70.6094	162.272	70.4326
Ift88	954.602	1.14727	0.292821	3.91799	8.92902e-05	0.00162314	66.4517	29.859	66.6685	29.0084	57.245	32.1585	75.4415	28.4102
Ube2o	6847.41	1.14503	0.142644	8.02716	9.97544e-16	6.81258e-14	477.233	213.608	519.911	215.368	541.911	235.874	369.877	189.583
Recql	309.541	1.14487	0.522364	2.19172	0.0283997	0.149299	22.1036	9.12631	35.8322	8.29799	14.5783	10.0144	15.9002	9.06656
Fam40b	946.015	1.14392	0.332533	3.44003	0.000581658	0.00813119	67.5679	27.8765	109.047	29.3196	40.6559	27.2584	53.0007	27.0515
Nexn	213.418	1.14379	0.797986	1.43334	0.15176	0.394587	16.3167	5.21526	1.37816	6.25807	21.8046	4.15035	25.7674	5.23736
Polr2b	2397.46	1.14338	0.198592	5.75742	8.54092e-09	3.12426e-07	166.792	75.0897	139.883	73.5755	183.674	78.6424	176.819	73.0513
Pepd	998.868	1.14207	0.338479	3.37413	0.000740504	0.00994152	71.0802	29.6965	109.564	27.5563	41.5984	29.936	62.0785	31.5971
Gigyf2	3669.16	1.14202	0.18875	6.05045	1.44443e-09	5.92413e-08	255.962	114.222	317.838	109.257	237.651	116.879	212.398	116.531
Clip2	5176.04	1.14118	0.167894	6.79708	1.06764e-11	5.44352e-10	360.003	162.212	338.166	156.832	317.329	175.573	424.513	154.23
Plch2	963.379	1.14039	0.302445	3.77056	0.000162884	0.00272781	67.1599	30.0363	70.803	28.6281	51.4011	32.453	79.2756	29.0278
Prph	645.739	1.13915	0.341515	3.33557	0.000851241	0.0111659	44.94	20.2092	53.576	20.2609	40.0275	19.7878	41.2165	20.5789
Sdc1	36.1242	1.13863	1.31127	0.868342	0.385207	0.635744	2.56927	1.07534	1.55043	0.726075	1.75945	1.33882	4.39793	1.16111
Prkdc	650.225	1.1382	0.396857	2.86804	0.00413023	0.0381466	46.1013	19.5005	27.7355	20.7796	70.8179	17.2172	39.7506	20.5048
Myo7a	1003.18	1.13805	0.306875	3.70853	0.00020847	0.00339202	70.3152	30.8964	70.9753	30.0111	91.9313	30.6858	48.039	31.9924
Pcdhga3	104.943	1.13604	0.833825	1.36244	0.173059	0.424142	7.44617	3.14164	7.57988	2.66227	3.70741	3.7487	11.0512	3.01395
Epha2	46.0297	1.13587	1.51658	0.748968	0.453877	0.689663	4.1097	0.534278	2.06724	0.760649	0	0.348094	10.2618	0.494091
Scaf4	1550.07	1.13464	0.274991	4.12607	3.69008e-05	0.000727654	109.515	46.8725	84.2401	44.0485	166.834	47.8763	77.4713	48.6926
Prrc2a	17237.1	1.13436	0.144502	7.85011	4.15671e-15	2.69066e-13	1199.2	539.866	1381.78	549.638	934.897	570.284	1280.93	499.674
Kif16b	579.144	1.13376	0.394619	2.87304	0.00406549	0.0377068	41.0924	17.338	61.6727	17.1838	38.2052	18.4757	23.3993	16.3544
Pcdhgc5	177.744	1.13223	0.641679	1.76448	0.0776515	0.270744	12.3993	5.53343	8.09669	6.3618	14.8925	5.24818	14.2087	4.99032
Prkcc	1732.35	1.13168	0.245862	4.60291	4.16625e-06	0.000102018	120.923	53.8554	164.862	57.4982	93.8793	58.9081	104.028	45.1599
Acsbg1	1185.17	1.13091	0.269677	4.19357	2.74593e-05	0.000556314	82.768	36.8051	110.425	42.7347	58.9416	34.3542	78.9373	33.3264
Ccdc151	180.274	1.12877	0.631563	1.78726	0.0738953	0.264079	12.6459	5.54212	16.5379	5.08252	7.98036	5.51594	13.4193	6.02791
3110056O03Rik	338.465	1.12753	0.46851	2.40662	0.0161008	0.10183	23.3508	10.7972	25.1514	8.22884	21.0506	12.1565	23.8503	12.0064
Nol8	797.264	1.12702	0.313529	3.59463	0.000324851	0.00499111	55.2193	25.2174	47.8911	27.0722	64.597	26.3212	53.1699	22.2588
Dlg5	3961.33	1.12672	0.186666	6.03605	1.57933e-09	6.38944e-08	275.932	123.73	216.544	122.707	255.246	125.207	356.007	123.276
Gstt2	103.556	1.12294	0.926838	1.21159	0.225671	0.486996	8.24405	2.20383	18.0884	2.17822	1.0054	1.74047	5.63838	2.69279
Smtn	144.869	1.12244	0.804445	1.3953	0.162927	0.410432	10.7887	3.82727	8.61351	3.52665	2.89053	4.79298	20.862	3.16218
Cdk20	198.953	1.12144	0.622511	1.80148	0.0716267	0.259459	13.9378	6.13477	14.2984	5.04795	8.23171	7.22964	19.2832	6.12672
Ldlr	329.573	1.12084	0.540659	2.0731	0.038163	0.178783	23.5521	9.69877	32.7313	9.23152	28.3397	8.9701	9.58524	10.8947
Cep350	4629.59	1.12081	0.184275	6.08224	1.18514e-09	4.9594e-08	322.078	145.005	245.14	143.348	411.209	139.291	309.885	152.378
Rusc1	3844.83	1.12079	0.184236	6.08344	1.17632e-09	4.94719e-08	267.991	119.917	359.355	126.406	238.029	124.028	206.59	109.318
Fras1	898.173	1.12048	0.293332	3.81983	0.000133543	0.00231724	61.9513	28.6661	64.2567	32.1202	61.2666	24.554	60.3306	29.3243
Lamb2	158.826	1.11943	0.797902	1.40296	0.160628	0.407542	12.4781	3.54598	9.13032	2.83515	26.8945	4.73943	1.40959	3.06336
Cdk5rap1	232.916	1.11905	0.590086	1.89642	0.0579039	0.229567	16.6215	6.87761	12.748	6.98415	9.48847	7.17608	27.628	6.47259
Cttn	4855.7	1.11761	0.168628	6.62769	3.40975e-11	1.63756e-09	335.165	154.731	347.641	150.332	302.186	174.181	355.669	139.679
Fbn1	385.297	1.11722	0.477106	2.34165	0.0191985	0.115439	27.3273	11.5456	29.1136	11.306	39.3363	11.621	13.5321	11.7099
Wdr47	3712.12	1.11692	0.167988	6.64883	2.95437e-11	1.44212e-09	256.62	117.899	282.523	117.002	256.503	121.351	230.835	115.345
Tbx5	103.33	1.11673	0.810504	1.37782	0.168258	0.418228	7.31488	3.11018	4.13448	2.766	5.96956	2.78475	11.8406	3.77979
Tubd1	149.594	1.11646	0.733386	1.52233	0.127926	0.358972	10.8746	4.21807	19.9833	3.5958	5.59254	4.36456	7.04797	4.69386
Nek11	83.1511	1.11589	1.18275	0.943471	0.34544	0.602535	7.05307	1.33612	0	0.898949	5.08984	1.55303	16.0694	1.55639
Zfc3h1	1479.37	1.115	0.235983	4.72491	2.30217e-06	5.90943e-05	102.184	47.0713	91.3032	47.0911	108.458	47.2336	106.791	46.8892
Ruvbl1	1092.55	1.1142	0.279776	3.98249	6.81961e-05	0.00127551	75.6843	34.5442	91.82	32.7771	64.4713	35.4788	70.7616	35.3769
Lig3	645.92	1.11402	0.338746	3.28866	0.00100664	0.0128753	44.5436	20.6238	42.723	22.4392	47.3795	20.484	43.5283	18.9484
Apobec3	25.0407	1.11034	1.54989	0.716399	0.473745	0.704849	1.75742	0.768959	1.03362	1.1064	1.19391	0.508752	3.04472	0.691727
Nemf	1731.93	1.11018	0.230057	4.82565	1.39548e-06	3.75694e-05	119.76	54.9754	95.9544	55.1471	131.896	55.454	131.431	54.3253
Jak1	4336.06	1.11012	0.160737	6.90645	4.96943e-12	2.66132e-10	299.346	138.123	343.162	141.446	295.399	148.93	259.478	123.992
Setdb1	1172.99	1.1097	0.262503	4.22737	2.36441e-05	0.000486878	80.9959	37.3483	70.9753	37.9287	93.188	38.3438	78.8245	35.7722
Dars2	352.003	1.10963	0.495154	2.24098	0.0250276	0.137191	25.005	10.509	40.828	10.4071	14.4526	11.4603	19.7343	9.65947
Atad2b	1643.44	1.1094	0.228501	4.85512	1.20316e-06	3.26874e-05	113.365	52.4437	123.001	49.4076	111.599	53.8206	105.494	54.1029
Msh2	1076.07	1.1087	0.271181	4.08843	4.3431e-05	0.000844127	74.218	34.3472	65.2904	34.5058	80.1178	36.1482	77.2458	32.3876
Trappc9	2254.91	1.10857	0.259412	4.27341	1.92506e-05	0.000404806	158.619	68.881	235.493	68.8734	96.0786	72.698	144.286	65.0717
Eps8	2207.17	1.10725	0.209447	5.28655	1.24644e-07	3.97366e-06	152.087	70.5963	167.963	66.1765	141.699	78.9101	146.598	66.7022
Scaf11	3058.71	1.10667	0.190794	5.80037	6.61698e-09	2.44451e-07	212.264	96.3317	193.459	92.9375	279.313	105.392	164.02	90.6656
Ccdc22	407.573	1.10602	0.515452	2.14572	0.0318952	0.159949	29.8559	11.2645	57.8828	10.6491	13.6986	13.3614	17.9864	9.78299
Pik3r4	948.515	1.10184	0.301293	3.65704	0.000255141	0.004041	65.5693	30.1272	52.0256	29.043	81.8144	28.0617	62.8679	33.277
Cbs	319.089	1.10112	0.469794	2.34382	0.0190871	0.11495	22.018	10.1751	25.6682	10.165	23.7526	11.862	16.6332	8.49836
Zfr2	1484.48	1.10023	0.258428	4.25738	2.06838e-05	0.000431894	103.067	46.7043	105.774	51.9316	70.755	42.9226	132.671	45.2587
Copz2	81.7486	1.0985	0.985571	1.11459	0.265028	0.528234	6.39921	1.84848	14.1261	1.97077	1.06824	1.49948	4.00325	2.07518
Adam21	61.4222	1.09694	1.46971	0.746365	0.455447	0.691273	5.10811	1.08883	12.748	0.760649	2.57634	0.776516	0	1.72932
Tubb2a	12115.2	1.09389	0.138682	7.88777	3.07644e-15	2.03565e-13	833.537	388.78	923.712	362.553	717.667	409.947	859.232	393.84
Ptpn13	486.29	1.09366	0.417454	2.61984	0.00879702	0.0672314	34.2228	14.8394	27.2187	15.455	21.4904	13.5489	53.9593	15.5144
Chd9	4233.84	1.09251	0.16619	6.57388	4.90203e-11	2.33167e-09	291.494	135.662	301.128	138.404	329.269	135.623	244.085	132.96
Laptm5	72.5198	1.09242	0.944055	1.15715	0.247209	0.510083	5.02825	2.28834	6.71853	2.31652	2.95336	1.63336	5.41284	2.91513
Tnik	10772.8	1.09217	0.121605	8.98128	2.67634e-19	2.26394e-17	739.87	347.002	746.963	344.298	770.388	363.865	702.26	332.844
Srcin1	15177.9	1.09189	0.12174	8.96908	2.98998e-19	2.51497e-17	1044.21	487.097	1005.71	469.079	1204.6	508.324	922.326	483.888
Evpl	753.645	1.09162	0.322684	3.38292	0.000717185	0.00968916	51.8912	24.1447	47.202	20.8487	44.3633	25.8928	64.1083	25.6927
Anxa7	495.563	1.09149	0.414314	2.63445	0.00842734	0.065245	34.3851	15.6127	42.8953	14.7981	22.3702	17.2172	37.8899	14.8227
Dido1	3125.17	1.09122	0.18697	5.83632	5.3365e-09	1.99635e-07	215.199	100.103	178.472	101.339	253.487	101.509	213.638	97.4594
Eif3d	2707.63	1.0899	0.224446	4.85597	1.19798e-06	3.26062e-05	187.786	85.3888	260.645	82.4959	153.072	95.4312	149.642	78.2393
Iqsec1	13039.9	1.0897	0.127702	8.53313	1.42444e-17	1.0765e-15	897.532	418.079	1066.87	439.31	851.071	400.682	774.656	414.246
Bbs5	193.243	1.08962	0.608172	1.79164	0.073191	0.262797	13.3265	6.17	13.0925	4.9788	9.80265	6.93509	17.0843	6.59611
Fam184b	624.629	1.08936	0.372008	2.92833	0.00340791	0.0329034	43.5168	19.5026	62.0172	18.8779	38.1424	20.1627	30.3908	19.4672
Nav1	14182.1	1.08854	0.125547	8.67039	4.30655e-18	3.35685e-16	975.326	455.518	940.423	467.661	1135.85	461.893	849.703	436.998
Lama5	132.714	1.08781	1.20871	0.899976	0.368133	0.620277	10.498	2.89157	11.1976	2.17822	20.2965	2.54376	0	3.95273
Pdzrn3	331.717	1.08753	0.52228	2.08227	0.0373182	0.176028	23.3962	10.0711	11.0253	11.0294	24.3181	9.74662	34.8452	9.43713
Abcf2	2178.7	1.08583	0.224099	4.84531	1.26414e-06	3.41569e-05	150.442	69.37	192.081	69.9452	115.747	72.0554	143.497	66.1093
Tubb4a	17869	1.08523	0.123619	8.77887	1.65127e-18	1.30767e-16	1227.4	575.419	1471.01	613.464	1108.14	609.191	1103.04	503.602
Col9a2	309.301	1.08433	0.531379	2.04059	0.0412914	0.187996	21.7786	9.42703	27.0464	7.74479	9.92833	9.66629	28.361	10.87
Top2b	4950.43	1.08229	0.172646	6.26885	3.63721e-10	1.57874e-08	340.252	159.202	266.33	163.609	397.573	171.798	356.853	142.199
Kif26b	2866.17	1.08083	0.179493	6.02156	1.72747e-09	6.91361e-08	196.329	92.8417	193.459	93.7673	194.294	89.6207	201.234	95.1372
Abcf3	1571.89	1.08064	0.257027	4.20438	2.61795e-05	0.000536122	108.429	50.1601	137.472	53.3838	77.9814	53.0977	109.836	43.9988
Zfp92	1376.54	1.08008	0.247704	4.36038	1.29837e-05	0.000284266	94.3379	44.5421	107.497	52.2082	77.353	42.039	98.1641	39.379
Arap1	513.583	1.07938	0.399848	2.69947	0.00694511	0.0565948	36.163	15.6529	59.6055	18.3939	22.4958	13.174	26.3876	15.3909
Trank1	8565.15	1.07842	0.169222	6.3728	1.85602e-10	8.34818e-09	590.5	273.646	578.655	268.648	748.709	263.667	444.135	288.623
Tfeb	254.129	1.07825	0.624636	1.7262	0.0843115	0.283539	17.9974	7.64188	24.6346	8.12512	6.40943	9.29142	22.9482	5.50911
Gys1	543.352	1.07789	0.461281	2.33673	0.0194532	0.116407	38.8541	15.9652	49.9583	16.7689	52.8464	14.6735	13.7576	16.4532
Akap11	6845.06	1.07742	0.161192	6.68406	2.32419e-11	1.14979e-09	470.406	220.199	433.948	224.322	577.225	210.623	400.043	225.651
Zc3h13	3473.65	1.07725	0.177818	6.05816	1.37689e-09	5.66275e-08	239.032	111.428	192.426	103.068	306.521	122.663	218.149	108.552
Tbc1d4	530.56	1.07609	0.452461	2.37831	0.017392	0.10762	38.8744	14.6543	76.8325	15.5933	19.6053	13.8434	20.1854	14.5263
Glg1	2288.08	1.07576	0.20409	5.271	1.35685e-07	4.28893e-06	156.885	73.962	156.766	65.6233	185.559	84.3725	128.329	71.8902
Zbbx	87.2382	1.07555	0.883909	1.21681	0.223675	0.484395	6.13189	2.66964	7.40761	3.25005	8.16888	2.43665	2.81919	2.32223
Nisch	17815.3	1.07527	0.113815	9.44746	3.47148e-21	3.2711e-19	1219.67	577.724	1324.07	582.934	1221.94	601.425	1113.02	548.811
Rsad2	23.8556	1.07518	1.79751	0.59815	0.54974	0.760431	1.8978	0.509011	0	0.06915	1.63378	0.642634	4.05963	0.81525
Pfkp	6147.84	1.07515	0.144322	7.44968	9.35667e-14	5.57208e-12	420.801	199.46	441.356	190.37	387.456	200.368	433.591	207.642
Def6	224.567	1.07499	0.710037	1.51399	0.130028	0.361909	16.7925	5.8643	31.87	4.52932	14.9553	6.31924	3.55218	6.74434
Ryr2	6464.49	1.07339	0.177549	6.04563	1.4883e-09	6.07063e-08	445.218	206.99	326.796	204.234	563.653	191.8	445.206	224.935
Nol6	2813.59	1.07293	0.205262	5.22711	1.72179e-07	5.28537e-06	194.518	89.3477	191.909	91.0705	259.142	95.6454	132.502	81.3273
Slc26a9	16.8616	1.07039	2.59963	0.411746	0.680526	0.841515	1.60785	0.0933269	4.82356	0.172875	0	0.107106	0	0
Dak	298.952	1.0703	0.493184	2.17018	0.0299934	0.154047	20.6882	9.47333	28.4246	9.88844	20.108	10.5767	13.5321	7.95486
Arhgap39	2060.09	1.07015	0.283719	3.77187	0.000162031	0.00271964	143.79	64.0544	73.2148	68.0436	185.622	66.7804	172.534	57.3392
Il16	87.0005	1.06965	0.956348	1.11847	0.263365	0.526023	6.89327	1.88429	16.7102	2.45482	1.31959	1.74047	2.65004	1.45757
4932438A13Rik	3975.32	1.06934	0.192745	5.54796	2.89022e-08	9.89184e-07	273.026	128.048	308.88	129.76	306.144	119.102	204.053	135.282
Nfe2l2	188.286	1.06828	0.624791	1.70982	0.0872984	0.289015	13.1431	5.85322	18.2606	7.1916	14.5155	5.00719	6.65328	5.36088
Odz4	3562.66	1.0679	0.186319	5.73159	9.94935e-09	3.60404e-07	244.05	115.39	267.535	115.411	266.934	109.435	197.681	121.324
Atic	919.155	1.06767	0.364961	2.92542	0.00343989	0.033127	66.0304	26.704	121.278	28.2478	35.3147	27.2584	41.4984	24.6057
Hapln4	900.93	1.06638	0.377232	2.82685	0.00470089	0.0423753	64.788	26.1076	118.866	28.5935	29.0938	27.4458	46.4038	22.2835
Lrriq1	165.758	1.06562	0.760047	1.40204	0.160903	0.407748	12.9233	3.8001	29.4582	3.7341	2.82769	3.2935	6.48413	4.3727
Slit1	1448.34	1.06485	0.247312	4.30571	1.66451e-05	0.000355542	99.1587	46.9661	92.8536	46.9182	118.637	45.7074	85.9852	48.2727
9130014G24Rik	28.2383	1.06483	1.44671	0.736035	0.461709	0.695972	1.93713	0.911858	2.23951	1.2447	2.38783	0.74974	1.18406	0.741136
4933409K07Rik	46.7517	1.0648	1.2573	0.846894	0.397054	0.645484	3.47005	1.24678	6.20172	1.2447	3.64458	0.963951	0.563838	1.53168
Ints9	310.923	1.0643	0.476149	2.23523	0.0254023	0.138633	21.2234	10.1459	24.4624	11.9975	21.6161	8.75589	17.5917	9.68418
Dhx15	2212.11	1.06427	0.220963	4.81649	1.46108e-06	3.91938e-05	151.789	71.3929	190.703	67.767	139.436	75.8308	125.228	70.5808
C920006O11Rik	45.512	1.06423	1.27043	0.837691	0.402204	0.648913	3.29673	1.29502	0.68908	1.69417	5.59254	0.856846	3.60856	1.33404
Uso1	2719.46	1.06365	0.199579	5.32944	9.85137e-08	3.18842e-06	186.68	87.6883	139.539	83.3948	190.963	88.3622	229.538	91.3079
Pikfyve	1794.57	1.06294	0.22446	4.73552	2.18492e-06	5.66708e-05	122.73	58.3258	140.572	57.8094	105.379	59.9524	122.24	57.2157
Mybbp1a	1391.37	1.06262	0.240187	4.42412	9.68342e-06	0.000217375	95.0068	45.3696	89.7527	43.599	89.0408	44.9041	106.227	47.6056
Jph2	192.508	1.06224	0.615788	1.72501	0.084526	0.283876	13.4505	5.9718	21.017	6.25807	8.73442	6.0247	10.6001	5.63263
Jag2	866.564	1.0607	0.299931	3.53647	0.000405513	0.00599531	59.3055	28.123	69.2526	28.2478	47.8822	26.4016	60.7817	29.7196
Ckmt1	8372.82	1.06004	0.133483	7.94144	1.99849e-15	1.34025e-13	571.063	273.678	627.925	274.422	574.146	299.146	511.119	247.465
Ctnna2	5729.38	1.05965	0.17989	5.8905	3.85025e-09	1.46231e-07	392.973	185.069	493.898	179.721	302.625	199.591	382.395	175.896
Chd6	4668.37	1.05953	0.16645	6.36544	1.9473e-10	8.73237e-09	319.738	151.258	392.087	155.691	262.598	147.806	304.529	150.278
Lemd2	527.765	1.05932	0.378693	2.79729	0.00515329	0.045604	36.1428	17.1039	26.5296	13.5534	34.8748	19.9217	47.0241	17.8367
2210039B01Rik	139.278	1.05845	0.721435	1.46715	0.142336	0.380903	9.90633	4.14553	4.65129	3.83782	6.91213	3.21317	18.1556	5.38559
Gadd45b	86.2797	1.0583	0.868879	1.218	0.223223	0.483958	5.98302	2.72182	9.47486	3.7341	3.45606	2.03501	5.01815	2.39634
Tbl3	431.749	1.05818	0.417215	2.53629	0.0112034	0.0794567	29.4625	14.097	24.1178	15.5933	32.864	13.3079	31.4058	13.3899
Akap8	1578.17	1.05814	0.22767	4.64767	3.35704e-06	8.39994e-05	107.442	51.7817	94.5763	45.2932	121.465	61.5322	106.283	48.5197
C2	52.848	1.058	1.18238	0.894804	0.370892	0.622515	4.07348	1.25841	8.78578	1.76332	0.5027	1.09783	2.93196	0.914068
Agrn	2106.13	1.0562	0.243936	4.32982	1.49229e-05	0.000322456	144.508	67.9805	184.674	60.7137	141.384	69.1635	107.467	74.0642
Cnksr2	1845.84	1.05616	0.234257	4.50854	6.52745e-06	0.000151845	126.416	59.8126	107.841	59.1578	110.657	62.4962	160.75	57.7839
Kdm5a	2056.77	1.05584	0.230181	4.587	4.49663e-06	0.00010921	141.552	65.9577	192.598	67.0409	110.72	64.7722	121.338	66.0599
Tek	58.075	1.05582	1.35041	0.781851	0.434302	0.674655	4.61464	1.2446	0	1.27927	5.78105	1.07106	8.06288	1.38345
Ahr	488.081	1.05526	0.389852	2.70683	0.00679293	0.0556288	33.2257	16.0172	37.0381	15.9391	30.162	18.1544	32.477	13.9581
Cnot1	4094.33	1.05521	0.162043	6.51191	7.4202e-11	3.47396e-09	278.849	134.232	269.603	136.744	274.537	138.648	292.406	127.302
Mast4	4154.37	1.0544	0.187921	5.61084	2.01343e-08	7.10331e-07	284.79	134.348	204.657	135.43	332.725	134.926	316.989	132.688
Cep120	2312.35	1.05331	0.215487	4.88803	1.01852e-06	2.8029e-05	157.735	75.5601	181.4	69.1154	133.593	82.3643	158.213	75.2006
Ahdc1	3614.5	1.05293	0.175159	6.01125	1.84097e-09	7.30889e-08	246.776	117.895	285.107	135.568	263.855	110.453	191.366	107.662
Madd	6028.46	1.05289	0.143074	7.35906	1.85216e-13	1.08992e-11	410.673	197.543	433.087	193.654	435.087	212.926	363.844	186.05
Eprs	2809.45	1.05218	0.207981	5.05902	4.21415e-07	1.22301e-05	193.226	90.222	167.791	84.1901	265.74	96.1809	146.147	90.2951
Kank1	1683.75	1.05062	0.245342	4.28227	1.84996e-05	0.000392899	115.969	53.9063	162.968	56.9796	91.6799	50.9823	93.2587	53.7571
Zfp462	4297.3	1.04947	0.173731	6.04074	1.53408e-09	6.24025e-08	293.27	140.288	233.598	139.683	311.8	146.467	334.412	134.714
Supt5h	4923.95	1.04936	0.166764	6.2925	3.12394e-10	1.37601e-08	335.134	161.648	379.167	146.529	347.869	190.113	278.367	148.301
Rnf31	600.095	1.04932	0.365992	2.86705	0.00414323	0.0381711	41.0946	19.4495	51.1642	19.0508	41.2214	18.7435	30.8983	20.5542
Ldha	4439.56	1.049	0.239791	4.37464	1.21634e-05	0.000268677	313.514	134.398	532.487	136.744	231.179	138.702	176.876	127.747
Sil1	278.044	1.04889	0.567915	1.84691	0.0647605	0.245394	19.7045	8.34765	34.454	7.0533	12.8189	9.63951	11.8406	8.35013
Ythdc2	836.623	1.04809	0.306438	3.42023	0.000625672	0.00864903	57.0203	27.3873	47.0297	27.7637	60.2612	27.1245	63.77	27.2738
Gem	159.088	1.04713	0.67108	1.56037	0.118673	0.343892	10.9852	5.06525	9.64713	4.5639	7.35199	5.54272	15.9566	5.08913
Epor	15.087	1.04581	2.17972	0.479789	0.631377	0.811389	1.25392	0.26822	0	0.20745	0.942563	0.37487	2.81919	0.222341
Ranbp6	1600.1	1.04542	0.227863	4.58793	4.47671e-06	0.000108904	108.947	52.489	120.245	54.6285	114.239	53.5529	92.3566	49.2855
Tigit	280.342	1.04531	0.587892	1.77806	0.0753943	0.266667	19.9859	8.29807	32.9036	6.15435	7.0378	7.20286	20.0162	11.537
Kdm4a	2036.44	1.0445	0.215311	4.85112	1.22768e-06	3.32928e-05	139.064	66.3941	145.741	64.7935	165.451	71.7876	106.001	62.6013
6330439K17Rik	12574.5	1.0423	0.126172	8.2609	1.44573e-16	1.03981e-14	853.951	414.706	860.489	419.222	803.566	436.59	897.799	388.306
Exoc4	1548.39	1.04223	0.229313	4.54501	5.49334e-06	0.000131487	105.157	51.0615	105.085	52.3465	101.734	51.0091	108.652	49.829
Melk	18.7293	1.0418	1.85602	0.561309	0.574587	0.776996	1.44505	0.444567	0.17227	0.5532	1.0054	0.508752	3.15749	0.27175
Ccdc88b	73.9763	1.04103	0.932779	1.11605	0.264401	0.527568	5.03543	2.42811	6.20172	2.42025	4.90133	2.8383	4.00325	2.02577
Dlgap2	1451.61	1.04075	0.323562	3.21654	0.00129746	0.0157301	102.192	44.2613	160.9	46.5033	45.9342	45.8145	99.7429	40.466
Ccnt1	713.814	1.04051	0.348196	2.98829	0.00280545	0.028305	49.5157	22.5016	77.177	25.5509	37.7653	19.8681	33.6047	22.0859
Ddx11	68.184	1.03996	1.09258	0.951838	0.341179	0.598995	5.01772	1.86142	7.75215	1.17555	0.816888	2.06178	6.48413	2.34693
Scaf8	2061.87	1.03971	0.244903	4.24537	2.18229e-05	0.000452507	142.309	65.7149	117.66	62.9265	209.186	67.9854	100.081	66.2328
Slco4a1	51.5191	1.03908	1.22012	0.851618	0.394426	0.643601	4.33125	0.866559	11.3698	1.07182	0.439863	0.589081	1.18406	0.938772
Cabin1	2866.92	1.03882	0.204211	5.08697	3.6382e-07	1.06416e-05	195.68	93.5658	238.766	91.3817	197.561	93.2891	150.714	96.0265
Pdzd3	45.9416	1.03877	1.17243	0.886003	0.375616	0.627406	3.20775	1.42734	4.65129	1.41757	3.39323	1.57981	1.57875	1.28464
Fam65a	2583.53	1.03762	0.198388	5.23027	1.69261e-07	5.22814e-06	176.175	84.4799	220.161	88.6157	163.063	82.6321	145.301	82.192
Plcz1	99.5479	1.03731	0.932282	1.11266	0.265856	0.529317	7.58522	2.45825	9.64713	2.73142	0.816888	1.90113	12.2917	2.7422
Myo1c	472.6	1.03636	0.407699	2.54196	0.0110231	0.0785228	32.4455	15.2355	21.1892	14.1757	32.6755	16.0659	43.4719	15.465
Lmtk3	2869.46	1.03634	0.215471	4.80967	1.51182e-06	4.0482e-05	197.429	92.0729	124.551	85.5731	269.322	97.7072	198.414	92.9384
Wdr67	217.011	1.03616	0.572467	1.81	0.0702961	0.25689	14.7355	7.15894	12.9203	5.8086	18.5999	7.09575	12.6863	8.57247
Ap1g2	83.428	1.03557	1.05425	0.982286	0.325959	0.585335	6.29014	2.12699	0.51681	2.3511	9.61414	1.95468	8.73948	2.07518
D130017N08Rik	124.873	1.03494	0.766419	1.35036	0.176899	0.428208	8.58066	4.01791	12.4034	4.32187	8.5459	2.86508	4.79262	4.86679
Tnrc6a	4137.01	1.03269	0.172844	5.97471	2.30503e-09	9.03086e-08	281.409	135.977	342.301	138.092	260.21	129.839	241.717	140.001
Marveld1	201.68	1.03183	0.614051	1.68037	0.0928861	0.299976	14.223	6.12472	24.8069	6.60382	8.67158	5.5695	9.19055	6.20084
Kdm6a	733.092	1.03147	0.334873	3.08019	0.00206866	0.0224477	49.7575	24.2048	56.1601	25.7584	53.4747	20.6446	39.6378	26.2115
Phip	2825.81	1.0311	0.226155	4.55926	5.13336e-06	0.000123466	193.752	91.3464	143.156	90.621	270.641	86.354	167.46	97.0641
Apba2	5562.97	1.03053	0.160127	6.43568	1.22919e-10	5.64821e-09	377.635	183.618	451.864	181.657	352.267	202.912	328.774	166.286
3425401B19Rik	36.5104	1.03047	1.58728	0.649208	0.516204	0.738025	3.00748	0.676088	0	0.656925	6.59794	0.481976	2.4245	0.889363
Msl3l2	454.786	1.03038	0.470716	2.18896	0.0285995	0.149926	32.3622	13.5216	51.3365	13.6225	11.7506	12.3172	33.9994	14.6251
Phf20	2547.46	1.02969	0.190053	5.41794	6.02899e-08	2.01707e-06	172.528	84.4871	181.228	81.9081	167.713	89.1387	168.644	82.4143
Nkrf	1374.74	1.02931	0.264898	3.88567	0.000102046	0.00182604	93.6864	45.0122	113.871	47.6789	68.1787	46.6445	99.0099	40.7131
Wdr7	6681.24	1.02885	0.163782	6.28185	3.34568e-10	1.46934e-08	455.941	218.136	551.953	218.099	492.395	230.545	323.474	205.764
Prickle2	5197.89	1.02668	0.162042	6.33592	2.3593e-10	1.04852e-08	352.599	171.82	411.036	172.771	302.877	180.232	343.885	162.457
Vkorc1	158.878	1.02651	0.833297	1.23186	0.218001	0.478419	12.7636	3.26572	30.4918	2.4894	1.82229	2.81152	5.97668	4.49622
St5	586.696	1.02583	0.373202	2.74872	0.00598282	0.0508984	40.2359	18.9564	25.1514	17.3221	53.6632	19.4129	41.8931	20.1342
Wbp7	2225.55	1.02536	0.203699	5.03371	4.81074e-07	1.38267e-05	150.6	73.9375	139.539	78.7964	146.663	70.2613	165.599	72.7548
Sh3tc1	52.8768	1.02514	1.43729	0.713244	0.475695	0.706069	4.4414	0.893388	9.30259	1.07182	4.0216	0.990728	0	0.617613
Ankrd44	643.16	1.02503	0.355859	2.88045	0.00397102	0.0369966	43.9692	20.9198	59.7777	20.8833	34.1836	20.7785	37.9463	21.0977
Ncor1	8723.08	1.0245	0.137365	7.45825	8.76794e-14	5.24245e-12	590.821	289.258	511.987	291.882	624.919	292.184	635.558	283.707
Dhx36	2164.93	1.02402	0.24075	4.25345	2.105e-05	0.000438311	148.543	69.878	204.657	68.8734	142.076	72.0821	98.8971	68.6786
Dmd	2592.83	1.0233	0.194264	5.26755	1.38254e-07	4.35162e-06	175.875	85.7183	188.808	89.9641	141.699	81.2932	197.118	85.8977
Dlg3	4596.18	1.02186	0.166912	6.12216	9.23127e-10	3.92672e-08	310.728	152.985	320.939	153.582	279.313	165.719	331.931	139.655
Ttc21b	472.791	1.02117	0.389368	2.62263	0.00872545	0.0668577	31.9275	15.7728	33.2481	17.0455	30.7904	16.0926	31.7441	14.1804
D10Bwg1379e	6945.02	1.01967	0.153594	6.63874	3.1638e-11	1.53429e-09	471.407	229.283	520.6	230.857	529.155	233.169	364.465	223.823
Zfp28	462.889	1.01944	0.43882	2.32315	0.0201713	0.119218	31.7533	14.9479	36.5213	14.5561	18.5371	16.6014	40.2016	13.6863
Cand2	330.546	1.01918	0.472152	2.15858	0.0308827	0.156683	22.5359	10.8132	24.9792	11.4789	15.3952	10.3625	27.2334	10.5982
Ppp1r12a	3435.34	1.01892	0.190069	5.36078	8.28613e-08	2.70535e-06	232.757	113.837	256.51	111.988	187.696	120.922	254.065	108.601
Pvrl2	359.539	1.01818	0.457999	2.22311	0.0262085	0.141579	24.4288	11.8454	31.0086	10.6145	17.4688	10.4696	24.8089	14.4522
Rccd1	146.094	1.01664	0.760778	1.33632	0.181445	0.433999	10.5798	4.1597	18.4329	4.4256	10.431	3.82903	2.87557	4.22447
4933403G14Rik	182.486	1.01639	0.628176	1.61801	0.105661	0.322546	12.3811	6.0301	9.47486	7.08787	11.3736	5.54272	16.2949	5.4597
Sec14l5	46.9993	1.01408	1.39994	0.724376	0.468835	0.701509	3.83263	0.909172	0	0.5532	2.70201	0.642634	8.79587	1.53168
Smchd1	1202.83	1.01256	0.256795	3.94306	8.04476e-05	0.00147479	81.298	40.0568	87.6855	43.4262	89.732	40.7002	66.4765	36.0439
Pcdhgb1	56.8203	1.01191	1.10376	0.916789	0.359253	0.614424	4.21738	1.51527	1.20589	0.898949	2.19931	1.79402	9.24694	1.85284
Nos1	1733.19	1.01186	0.2212	4.5744	4.77588e-06	0.000115615	116.871	57.9927	123.001	65.1047	123.978	55.2398	103.633	53.6335
Tpst2	223.469	1.0115	0.569687	1.77554	0.0758087	0.26745	15.3552	7.19076	18.2606	7.77937	19.2911	7.44385	8.51395	6.34906
Megf8	2767.78	1.0115	0.188386	5.36929	7.90465e-08	2.59217e-06	187.054	92.1897	169.514	83.7406	168.593	94.9492	223.054	97.8794
Ltn1	1476.33	1.01131	0.248995	4.06159	4.87399e-05	0.000937518	99.9067	49.042	113.698	49.3039	106.07	46.5107	79.9522	51.3113
Ahctf1	1284.98	1.01027	0.251996	4.00908	6.09547e-05	0.0011531	86.6427	42.9997	89.925	42.3198	89.5435	40.7537	80.4596	45.9257
Rtn4r	354.239	1.01002	0.463071	2.18114	0.0291728	0.151702	24.2294	11.5101	34.7986	11.7901	18.6627	11.9691	19.2269	10.7712
Daam1	4618.09	1.00931	0.192183	5.25184	1.5059e-07	4.71996e-06	314.169	151.755	221.195	154.827	316.701	150.778	404.61	149.66
Uba1	8483.68	1.00928	0.130427	7.73827	1.00782e-14	6.38483e-13	572.41	283.516	558.5	291.398	660.862	307.929	497.869	251.22
Zfp804b	273.19	1.00782	0.513068	1.96431	0.0494943	0.208624	18.3366	9.22576	18.0884	8.88577	19.6681	7.55095	17.2534	11.2406
Klc4	471.464	1.00706	0.434068	2.32005	0.0203381	0.119966	32.4983	15.0681	49.6138	14.3486	20.4222	16.2801	27.4589	14.5757
Hcfc1	4686.74	1.00495	0.17335	5.79724	6.74156e-09	2.47823e-07	317.608	155.242	328.175	159.321	386.765	156.99	237.883	149.413
Plekha5	1583.06	1.00404	0.253149	3.96622	7.30214e-05	0.00135554	106.914	52.8031	128.858	46.1922	88.4752	56.3108	103.408	55.9064
Fancd2	73.1979	1.00387	1.38342	0.725648	0.468054	0.700975	5.60824	1.77677	10.1639	1.86705	6.66078	1.0175	0	2.44575
Nudt17	145.947	1.00386	0.783905	1.28059	0.200337	0.457176	10.7948	3.92991	22.0506	3.56122	7.28915	3.85581	3.04472	4.3727
Rere	11260.6	1.00339	0.131082	7.65473	1.93724e-14	1.20174e-12	760.435	375.653	905.107	389.038	738.781	385.313	637.418	352.608
Atg16l2	124.966	1.00336	0.769386	1.30411	0.192197	0.44689	8.82104	3.7869	11.5421	3.97612	11.8763	4.12357	3.04472	3.261
Raver2	461.057	1.00199	0.416688	2.40466	0.0161874	0.102199	31.5627	14.9538	46.3407	15.3859	25.512	14.4057	22.8354	15.0698
Erap1	110.414	1.00083	0.958738	1.0439	0.296532	0.558989	8.83452	2.30528	18.2606	2.42025	7.79185	2.86508	0.45107	1.6305
1700017B05Rik	450.884	1	0.462618	2.16161	0.0306482	0.15605	31.4021	14.0881	16.0211	15.2821	51.9666	13.7899	26.2184	13.1922
Fgd6	380.12	0.999543	0.453006	2.20647	0.0273511	0.14569	26.0984	12.2523	15.6766	11.2023	23.3756	11.9423	39.2431	13.6122
Trim25	258.152	0.999201	0.537943	1.85745	0.0632473	0.241814	17.3142	8.73104	20.3279	7.84852	17.406	7.20286	14.2087	11.1417
Zfp433	33.7954	0.999199	1.41132	0.70799	0.478952	0.708465	2.43389	0.975757	4.65129	1.383	2.19931	0.481976	0.45107	1.06229
Myof	109.524	0.999027	1.10842	0.901305	0.367426	0.619577	8.98959	2.06038	0	1.69417	7.85469	2.11534	19.1141	2.37164
Fig4	1043.93	0.998352	0.30297	3.29521	0.000983467	0.0126006	70.8141	34.5087	92.1645	32.4659	51.7153	37.1657	68.5627	33.8946
Polrmt	463.149	0.997592	0.401608	2.484	0.0129917	0.0878516	31.3146	15.4129	39.2776	15.2476	28.8424	15.4768	25.8238	15.5144
Lmf2	225.434	0.996687	0.640969	1.55497	0.119953	0.346434	16.1835	6.56073	12.0589	5.2554	30.8532	7.01542	5.63838	7.41136
E030019B06Rik	66.738	0.99628	1.03381	0.963693	0.3352	0.593427	4.82903	1.90423	6.20172	1.76332	1.06824	1.55303	7.21712	2.39634
Dnahc2	231.174	0.996169	0.615524	1.61841	0.105575	0.32252	16.7244	6.59903	33.0759	7.26075	10.5567	5.89081	6.54052	6.64552
Cox16	279.436	0.995622	0.556102	1.79036	0.0733964	0.263307	19.3369	8.85569	12.0589	9.19694	14.2641	9.93405	31.6877	7.43606
Stc1	143.585	0.995363	0.739241	1.34647	0.178152	0.429564	9.93177	4.55468	6.20172	4.149	16.7148	3.56126	6.87882	5.95379
Cebpz	1074.34	0.994376	0.312111	3.18597	0.0014427	0.0170198	73.8389	34.5526	111.803	34.7824	63.5916	35.7465	46.1219	33.1288
Phrf1	2533.03	0.994157	0.187954	5.28936	1.22746e-07	3.92157e-06	170.185	85.3744	168.308	85.0544	180.595	87.9873	161.652	83.0813
Bcas3	876.969	0.994084	0.303529	3.27508	0.00105631	0.0133387	59.2913	29.1869	75.282	29.8382	55.7369	30.177	46.8549	27.5456
Nbea	9754.85	0.993823	0.134846	7.37007	1.70543e-13	1.00756e-11	657.002	327.173	613.282	319.092	780.693	338.427	577.031	324
Dkk1	160.255	0.993055	0.688422	1.44251	0.149159	0.390895	11.1476	5.02064	16.1934	4.87507	4.90133	4.90009	12.348	5.28677
Pgd	745.014	0.99283	0.362156	2.74144	0.006117	0.0518326	51.0938	24.0713	74.7652	23.1307	47.5052	24.2059	31.0111	24.8775
Unc13c	2652.41	0.992746	0.187809	5.28592	1.25075e-07	3.97889e-06	178.292	89.3112	196.905	89.3072	165.326	88.2819	172.647	90.3445
Tbc1d17	899.66	0.991078	0.373885	2.65075	0.00803126	0.0629976	63.0763	27.6912	103.879	25.9312	57.4963	30.9803	27.8536	26.1621
Mms19	547.597	0.990935	0.398321	2.48778	0.0128544	0.0871079	38.0431	17.2045	64.429	19.6732	23.3127	15.2893	26.3876	16.6509
Pion	125.752	0.990565	0.890093	1.11288	0.265761	0.529247	10.0278	2.65943	24.6346	2.38567	3.64458	2.35633	1.80428	3.23629
Parp2	391.816	0.990172	0.431206	2.29629	0.0216596	0.125048	26.3745	13.1562	23.2565	14.072	32.2985	13.0937	23.5684	12.3029
Ttc28	1470.6	0.990009	0.263795	3.75294	0.000174772	0.00289434	99.7663	48.6042	80.9669	51.4476	79.7408	45.8948	138.591	48.4703
Sgk2	54.6948	0.989884	1.13748	0.870244	0.384167	0.635215	3.98724	1.53097	6.20172	2.0745	5.027	1.25849	0.732989	1.25993
Cdk12	1964.28	0.989815	0.219215	4.51526	6.32381e-06	0.000148266	132.189	65.9892	140.228	71.1553	149.49	62.6301	106.847	64.1824
Sec23ip	1603.46	0.988928	0.237238	4.16851	3.06599e-05	0.000616012	107.563	54.2116	104.568	56.9104	99.0948	57.3283	119.026	48.3962
Pdlim1	20.7197	0.9877	1.94922	0.506715	0.612355	0.799714	1.7606	0.329826	3.96221	0.4149	1.31959	0.401646	0	0.172932
Plekha7	720.559	0.987538	0.322977	3.05761	0.0022311	0.0237261	48.4442	24.2536	50.1306	24.4099	54.6058	24.9556	40.5963	23.3952
Exoc2	867.695	0.986725	0.311794	3.16467	0.0015526	0.0180804	58.8354	28.7071	81.4838	30.5643	49.0133	26.4551	46.0091	29.1019
Hist2h2be	66.1745	0.986083	1.01062	0.97572	0.329203	0.588236	4.634	2.0424	7.57988	2.38567	4.46146	1.74047	1.86066	2.00107
4930417O22Rik	26.9278	0.985027	1.48127	0.664989	0.506057	0.729209	1.85725	0.859523	1.7227	0.795224	2.89053	1.0175	0.958524	0.76584
Amotl1	5036.09	0.984372	0.172885	5.69381	1.24233e-08	4.46759e-07	338.658	169.438	336.616	165.165	277.679	179.804	401.678	163.346
Nanos3	65.4572	0.983841	1.03571	0.94992	0.342153	0.599784	4.81318	1.79085	4.30675	1.83247	9.17428	2.32955	0.958524	1.21052
Pbrm1	3338.95	0.98367	0.176676	5.56766	2.58183e-08	8.95997e-07	224.176	112.693	258.061	112.956	222.256	120.896	192.212	104.228
Scaper	2024.49	0.983239	0.213052	4.61503	3.93043e-06	9.67212e-05	136.085	68.1684	109.047	62.719	138.682	72.5641	160.525	69.2221
Clmn	1706.66	0.982673	0.219338	4.48017	7.45833e-06	0.000171357	114.33	57.8562	114.904	58.2588	112.668	57.007	115.418	58.3027
Pfkm	5378.78	0.982567	0.148173	6.63122	3.32929e-11	1.60409e-09	360.236	182.435	383.129	183.697	355.723	195.789	341.855	167.818
Vwa5a	244.092	0.981332	0.534547	1.83582	0.0663841	0.248949	16.3745	8.25221	21.5338	10.6837	12.2533	7.55095	15.3364	6.522
Tmtc4	246.546	0.980729	0.546081	1.79594	0.0725037	0.261301	16.9238	7.95045	12.9203	6.25807	10.054	7.39029	27.7972	10.203
Mga	3625.72	0.980627	0.198261	4.94613	7.5702e-07	2.12251e-05	244.026	121.776	242.901	121.047	299.107	114.014	190.07	130.267
Atp6v1b2	12513.7	0.980438	0.140725	6.96703	3.23702e-12	1.75886e-10	840.097	422.422	1004.16	429.94	712.829	452.923	803.299	384.403
Padi2	569.857	0.980333	0.421746	2.32446	0.0201008	0.118896	40.1709	17.3225	24.9792	18.9471	21.0506	14.2451	74.4829	18.7754
Pfas	756.293	0.980285	0.325059	3.01572	0.00256373	0.0264327	51.009	25.2941	64.7736	27.1759	50.0815	23.8042	38.1718	24.9022
Gpr21	76.5319	0.979573	0.952831	1.02807	0.303919	0.566443	5.26006	2.46131	8.09669	2.4894	5.08984	1.95468	2.59365	2.93984
Atxn2l	3785.95	0.97935	0.162487	6.02725	1.66771e-09	6.71052e-08	253.419	128.548	265.468	132.56	263.729	136.158	231.061	116.927
Lypd6b	362.705	0.979293	0.479946	2.04042	0.0413082	0.188015	24.545	12.0486	31.87	10.5799	15.7722	14.0041	25.9929	11.5617
4933421E11Rik	385.376	0.978807	0.477799	2.04858	0.0405035	0.185715	26.6257	12.2552	40.6557	12.8273	26.1404	11.4871	13.081	12.4511
Sel1l3	353.338	0.978773	0.498284	1.96429	0.0494969	0.208624	24.2311	11.4175	33.7649	11.548	26.5803	10.2286	12.348	12.4758
Agl	1568.09	0.978574	0.288412	3.39298	0.000691376	0.00941743	107.608	50.5981	153.32	52.8306	112.668	48.8134	56.8348	50.1502
G3bp2	8548.29	0.977818	0.136767	7.14952	8.70797e-13	4.85559e-11	573.255	289.189	659.795	291.571	565.035	301.851	494.937	274.146
Aco2	5787.96	0.977102	0.155555	6.28139	3.35566e-10	1.46938e-08	388.626	195.327	468.919	197.665	343.093	194.879	353.864	193.436
I830012O16Rik	42.2399	0.976954	1.27	0.769252	0.441744	0.68021	2.9579	1.30373	4.82356	0.760649	1.0054	1.44593	3.04472	1.70461
Dnahc1	307.657	0.97564	0.497097	1.96267	0.0496842	0.209072	20.8801	10.1597	15.8488	10.822	16.4006	9.47886	30.3908	10.1783
Ltbp1	110.128	0.975307	0.796188	1.22497	0.220586	0.480853	7.51131	3.59961	10.6807	5.08252	8.35739	2.67764	3.49579	3.03866
Gemin4	366.377	0.975275	0.550399	1.77194	0.0764042	0.26831	26.9549	10.0091	56.5046	10.3725	15.3952	9.13076	8.96502	10.5241
Lars	1019.01	0.973982	0.293512	3.31837	0.000905431	0.0117351	68.4875	34.3209	51.3365	35.3356	72.2003	34.6219	81.9256	33.0053
Casp8	36.0326	0.97398	1.29202	0.753844	0.450943	0.687239	2.416	1.21936	2.75632	1.2447	2.0108	1.17816	2.48089	1.23523
Pard3	1144.23	0.973603	0.277233	3.51186	0.00044499	0.00648875	76.8689	38.5731	90.6141	35.8888	80.6205	41.316	59.3721	38.5144
C77370	4907.59	0.973465	0.159209	6.1144	9.69225e-10	4.11106e-08	328.973	166.159	357.116	170.04	358.991	166.523	270.811	161.914
Wdr75	576.484	0.972853	0.392302	2.47986	0.0131435	0.0884257	39.4557	18.7062	60.9836	18.9125	26.2032	19.1719	31.1802	18.0343
Capn5	2369.02	0.971512	0.202136	4.80624	1.53797e-06	4.10346e-05	158.33	80.6828	171.064	79.7645	143.458	87.4786	160.468	74.8053
Dlgap5	22.1702	0.971239	2.00107	0.48536	0.627421	0.808851	1.64575	0.591015	3.61767	0.311175	1.31959	0.37487	0	1.087
Plin3	98.8255	0.970433	0.834264	1.16322	0.24474	0.507465	6.79819	3.1724	9.30259	3.66495	3.14188	2.8383	7.95011	3.01395
Atad5	247.432	0.970092	0.583933	1.66131	0.096652	0.306313	17.2851	7.67847	26.3573	7.84852	18.7884	7.89905	6.70967	7.28784
Isyna1	1249.56	0.968942	0.297541	3.2565	0.00112794	0.0140997	85.5432	40.5265	133.337	42.8384	54.1659	40.9679	69.1265	37.7732
Jarid2	2045.54	0.968198	0.21816	4.43801	9.07937e-06	0.000204809	136.703	69.6727	136.438	71.9851	120.082	73.3942	153.589	63.6389
Sulf1	533.476	0.968023	0.433018	2.23552	0.025383	0.138578	37.267	16.5559	65.6349	16.3885	25.135	16.6282	21.0311	16.6509
Gpr156	67.2872	0.967545	1.00424	0.963457	0.335318	0.593458	4.76869	2.01997	7.23534	2.4894	1.31959	1.44593	5.75114	2.12459
Slc5a7	111.038	0.967518	0.946257	1.02247	0.306559	0.568905	8.58547	2.61727	18.6052	2.14365	1.0054	2.89185	6.14583	2.81632
Zbtb7c	851.895	0.966546	0.29747	3.24922	0.0011572	0.0143433	56.9304	29.0181	61.845	29.2159	60.5125	31.3552	48.4336	26.4833
Kank4	181.916	0.966077	0.612387	1.57756	0.114667	0.337449	12.1233	6.23032	12.2312	5.28997	10.4939	5.89081	13.6449	7.51018
Tyw3	333.39	0.965444	0.488252	1.97735	0.0480021	0.205125	22.5371	11.0989	29.2859	10.7528	24.0039	10.3893	14.3215	12.1546
Pskh1	366.152	0.964359	0.52035	1.85329	0.0638408	0.243396	25.5284	11.4131	11.1976	12.9656	21.2391	10.2554	44.1485	11.0182
Zfp568	222.069	0.963849	0.576286	1.67252	0.0944219	0.302633	15.0666	7.33808	9.8194	6.84585	13.4472	7.97938	21.9333	7.18902
Spata2l	583.899	0.963815	0.358422	2.68905	0.00716561	0.0577907	39.3357	19.5744	54.7819	23.0269	29.2823	17.2172	33.943	18.479
Rbm14	755.636	0.963387	0.31901	3.01993	0.00252832	0.02614	50.5408	25.696	57.0214	25.3089	52.595	26.1606	42.0059	25.6186
Zfp385c	30.9758	0.963288	1.647	0.584873	0.558633	0.766396	2.43707	0.688102	0	0.587775	4.21011	0.883622	3.10111	0.592909
Ubr2	2247.48	0.962627	0.228334	4.21588	2.4881e-05	0.000511642	151.286	75.464	104.912	75.7883	193.665	76.6877	155.281	73.916
Dock3	6269.8	0.962351	0.143713	6.69633	2.13717e-11	1.07132e-09	418.468	214.098	419.478	213.397	458.211	215.523	377.715	213.373
Fam40a	2213.87	0.961485	0.20342	4.72659	2.28319e-06	5.87084e-05	147.816	75.5431	154.354	76.5144	128.063	75.1614	161.032	74.9535
Ecd	888.344	0.960318	0.295322	3.25177	0.00114689	0.0142529	59.3462	30.2796	69.0803	30.7717	56.2396	29.5076	52.7188	30.5595
Arhgef18	1731.5	0.958563	0.234253	4.09199	4.27685e-05	0.000833426	115.702	58.99	91.82	59.1232	122.785	62.6568	132.502	55.1899
Loxl1	139.373	0.958016	0.718891	1.33263	0.182653	0.435265	9.39064	4.67083	13.4371	4.52932	6.22091	5.70338	8.51395	3.77979
Chd4	6780.76	0.957477	0.13891	6.8928	5.47032e-12	2.8983e-10	451.454	232.663	457.033	216.854	454.378	240.908	442.951	240.227
Polr1a	1223.63	0.957177	0.305394	3.13423	0.00172304	0.0195267	82.7472	40.7064	52.3701	44.6017	116.878	39.522	78.9936	37.9956
Suclg2	217.331	0.95696	0.586568	1.63146	0.102794	0.317662	14.7205	7.20624	19.9833	7.15702	15.2695	6.82799	8.90863	7.6337
Wif1	133.597	0.956901	0.796777	1.20096	0.229765	0.491839	10.2147	3.26402	24.4624	4.39102	3.64458	2.11534	2.53727	3.2857
Tnr	2220.88	0.956278	0.224355	4.26234	2.02301e-05	0.000423608	149.007	75.0594	104.74	72.3309	181.475	71.8412	160.806	81.0062
Ncln	419.826	0.955435	0.444144	2.15118	0.0314619	0.158566	28.4151	13.9415	41.0003	12.689	19.6053	13.8434	24.6397	15.2921
Scamp2	157.416	0.95536	0.691064	1.38245	0.166835	0.415843	10.8514	5.03043	4.65129	4.32187	16.4006	4.7662	11.5023	6.0032
Fam53b	423.877	0.95531	0.427206	2.23618	0.0253401	0.138444	28.7148	14.0506	40.1389	15.3513	17.5317	12.7188	28.4738	14.0816
Capn2	1960.03	0.954973	0.210396	4.53892	5.65421e-06	0.000134904	130.66	67.0895	148.841	69.5994	120.334	66.9678	122.804	64.7012
Stat1	341.078	0.954963	0.455407	2.09694	0.0359987	0.172204	22.655	11.7567	19.4665	10.3379	23.6897	10.6035	24.8089	14.3286
Phka2	353.904	0.953654	0.496536	1.92062	0.0547802	0.222105	24.1768	11.5289	12.2312	11.4789	35.3775	10.3357	24.9216	12.7722
Nap1l2	4776.23	0.953499	0.159571	5.97538	2.29548e-09	9.01717e-08	318.039	163.84	287.174	155.553	309.412	176.992	357.529	158.974
Tuba1c	596.11	0.953244	0.363378	2.62328	0.0087087	0.0667981	39.9208	20.2213	45.4793	20.0189	29.3451	20.5107	44.9379	20.1342
D2hgdh	237.466	0.953113	0.622716	1.53057	0.125875	0.356278	17.0486	6.9096	33.7649	7.3299	11.1222	5.86404	6.2586	7.53488
Tbx22	19.4824	0.953105	1.72031	0.55403	0.579558	0.77991	1.31632	0.649273	2.06724	0.518625	0.75405	0.910399	1.12768	0.518795
Tubb4b	7719.52	0.952574	0.16327	5.83434	5.40053e-09	2.01511e-07	516.914	261.915	652.559	272.935	392.42	271.941	505.762	240.869
Hectd3	1440.92	0.951919	0.258379	3.68419	0.00022943	0.0036689	96.1887	49.1872	81.4838	46.0193	86.5901	55.6414	120.492	45.901
L1cam	3933.73	0.951326	0.178754	5.32198	1.02643e-07	3.31484e-06	263.618	133.26	194.665	124.677	341.333	145.503	254.855	129.6
Nf1	8181.79	0.950553	0.132622	7.16738	7.6447e-13	4.29488e-11	544.059	281.409	517.844	289.911	540.403	275.155	573.93	279.161
Ik	3940.87	0.950167	0.185155	5.13175	2.87059e-07	8.49648e-06	261.953	135.646	241.006	125.438	240.605	158.249	304.247	123.251
Ppil2	1073.43	0.94997	0.277883	3.4186	0.000629453	0.00867712	71.8058	36.4939	85.2737	37.0644	53.3491	33.9525	76.7947	38.465
Kif3a	8240.5	0.949164	0.133224	7.12458	1.04399e-12	5.77804e-11	547.586	283.805	542.651	281.164	534.747	300.083	565.36	270.169
Gart	843.125	0.948743	0.315347	3.00857	0.00262478	0.026913	56.1807	28.8829	53.2315	29.2159	47.8194	31.2213	67.4914	26.2115
D17H6S56E-3	43.8823	0.948405	1.38369	0.685418	0.49308	0.718928	3.48246	0.944869	0.17227	1.07182	2.32499	1.07106	7.95011	0.691727
Hadha	1187.27	0.94829	0.267786	3.54123	0.000398268	0.00590579	79.4061	40.3783	96.6435	42.1469	81.7516	40.3253	59.8232	38.6626
Ccdc18	48.1917	0.947987	1.2181	0.778253	0.43642	0.676251	3.78879	1.07332	9.30259	1.21012	0.879725	1.07106	1.18406	0.938772
Dip2c	4747.34	0.947504	0.179803	5.26969	1.36656e-07	4.31044e-06	317.717	161.246	412.587	158.215	277.365	168.799	263.199	156.726
Tpk1	75.3373	0.947215	0.944412	1.00297	0.315877	0.578152	5.13293	2.46792	5.34037	2.73142	7.35199	2.276	2.70642	2.39634
Ifi203	181.859	0.94699	0.701766	1.34944	0.177196	0.428524	12.926	5.42199	24.9792	4.21815	5.34119	4.68587	8.45756	7.36195
Ptbp1	648.64	0.946755	0.378642	2.5004	0.0124054	0.0849549	43.9238	21.518	59.0886	20.6413	47.2538	21.8763	25.4291	22.0364
Sun2	198.87	0.946608	0.629734	1.50319	0.132791	0.366177	13.4408	6.62332	19.4665	5.22082	12.5675	7.01542	8.28841	7.6337
Snhg8	96.4946	0.945893	0.961018	0.984262	0.324987	0.58478	7.04566	2.68977	11.8866	1.86705	1.13108	2.89185	8.11926	3.31041
Utp6	1266.29	0.945576	0.282014	3.35294	0.000799581	0.0105721	85.0687	42.6884	111.286	44.0831	57.3707	44.2079	86.5491	39.7743
Myo9a	5418.56	0.944657	0.148532	6.35994	2.01832e-10	9.02366e-09	359.785	186.899	339.544	188.053	377.151	178.786	362.66	193.856
Usp3	382.588	0.943834	0.437903	2.15535	0.0311345	0.157431	25.5766	13.023	33.2481	13.3805	22.056	12.0762	21.4258	13.6122
Pkm2	16495.6	0.943529	0.13613	6.93108	4.17654e-12	2.25291e-10	1101.1	563.16	1414.51	590.783	943.003	592.428	945.781	506.27
1300001I01Rik	3331.65	0.943277	0.177262	5.32137	1.02987e-07	3.31876e-06	221.376	114.757	258.061	124.228	196.996	118.78	209.071	101.264
Mc4r	79.5667	0.943062	1.02678	0.918465	0.358376	0.613477	6.29533	1.73223	15.5043	1.55587	1.63378	2.03501	1.7479	1.60579
Hspa1a	42.0873	0.942981	1.31349	0.71792	0.472806	0.704125	3.08531	1.16092	1.37816	0.795224	0.942563	1.84757	6.9352	0.839954
Itpr2	790.08	0.94293	0.375389	2.51188	0.0120092	0.0832366	53.815	25.8968	27.7355	26.761	78.7354	23.1616	54.9742	27.7679
Nr4a3	261.238	0.94285	0.538596	1.75057	0.0800202	0.275773	17.6079	8.74865	24.1178	9.99217	10.4939	8.91655	18.212	7.33725
Mtap1s	1418.11	0.941612	0.296658	3.17407	0.00150319	0.0175939	96.3665	46.7076	127.824	51.2401	49.5788	45.6003	111.696	43.2823
Rrbp1	931.131	0.941146	0.327576	2.87307	0.0040651	0.0377068	63.4616	30.481	31.6977	26.4153	66.1051	31.9978	92.5821	33.03
Cd3d	124.423	0.941102	0.753788	1.2485	0.211849	0.470256	8.55399	3.99915	5.34037	3.90697	5.71821	3.66837	14.6034	4.42211
Uhrf2	1207.36	0.939305	0.290761	3.2305	0.00123574	0.0151048	80.8931	40.9182	110.597	37.825	64.5341	45.2789	67.5477	39.6508
Ift122	910.797	0.939008	0.309878	3.03025	0.00244348	0.0254189	61.1222	30.769	41.6894	30.0457	57.4963	28.4901	84.181	33.7711
Nbeal2	387.92	0.938963	0.440545	2.13137	0.0330589	0.163654	25.8338	13.3038	25.496	14.0029	31.4816	12.0494	20.5237	13.8592
Arhgef6	305.512	0.937789	0.528736	1.77364	0.0761221	0.267731	21.2464	9.577	37.0381	9.71557	16.7776	10.7641	9.92354	8.25131
Mvd	471.87	0.937323	0.440554	2.1276	0.0333701	0.164399	32.7196	14.8878	55.9878	16.2157	15.3324	13.2543	26.8387	15.1933
Nono	4653.62	0.936894	0.189848	4.93498	8.01607e-07	2.22655e-05	309.608	159.899	387.263	148.015	256.88	182.615	284.682	149.067
Sdad1	982.55	0.936439	0.30439	3.07644	0.00209487	0.0226496	66.0055	33.1249	85.7905	32.8462	69.9382	35.7465	42.2878	30.7818
Specc1l	2989.92	0.934971	0.214709	4.3546	1.33311e-05	0.000290166	199.953	101.703	268.397	95.7381	165.074	103.437	166.388	105.933
Ncoa3	1939.9	0.934491	0.286318	3.26382	0.00109921	0.0138219	131.787	63.9317	185.363	58.3971	68.8699	66.0039	141.129	67.394
Prss56	35.1773	0.933983	1.8176	0.513856	0.607353	0.796465	3.38407	0.165004	0.17227	0.103725	0	0.267764	9.97993	0.123523
Magel2	1378.1	0.933671	0.273691	3.41141	0.000646282	0.00887625	92.8489	46.1885	131.442	48.6124	87.2813	45.7074	59.8232	44.2458
Ebf2	199.857	0.933589	0.628378	1.48571	0.137355	0.373166	13.8023	6.36151	19.9833	6.60382	5.46686	5.81048	15.9566	6.67022
Usp14	2182	0.933576	0.199308	4.68408	2.81222e-06	7.1326e-05	144.663	75.4808	167.791	84.1555	138.997	73.2871	127.202	68.9998
Tmem86b	23.9697	0.932002	1.56679	0.594849	0.551944	0.761648	1.71072	0.707608	3.4454	1.00267	0.5027	0.428423	1.18406	0.691727
Atxn2	5096.01	0.931722	0.155614	5.98738	2.13249e-09	8.42135e-08	337.441	176.7	347.297	180.447	307.778	183.392	357.248	166.261
S1pr3	122.998	0.931625	0.748688	1.24434	0.213373	0.472301	8.39068	4.01865	13.4371	4.8405	4.46146	3.53449	7.27351	3.68098
Ncstn	572.822	0.93149	0.471903	1.9739	0.0483928	0.206154	40.1106	17.6819	72.8703	15.9045	16.3378	21.2069	31.1238	15.9344
Dicer1	4040.75	0.931055	0.213657	4.35772	1.31426e-05	0.000286902	272.654	135.021	394.843	139.89	171.421	135.623	251.697	129.551
Gga3	1336.72	0.930931	0.257889	3.60981	0.000306416	0.00474705	89.0859	45.7769	117.316	51.6204	68.2415	45.7877	81.7001	39.9225
Smg6	2006.01	0.930914	0.205569	4.52848	5.94083e-06	0.000140789	132.744	69.6442	132.993	71.0516	140.63	73.18	124.608	64.7012
Tcea3	61.2913	0.929358	1.0869	0.855054	0.392521	0.641864	4.26073	1.923	2.06724	2.55855	2.76485	1.90113	7.95011	1.30934
Rest	341.112	0.929297	0.502029	1.85108	0.0641576	0.244166	23.5275	10.8876	41.5171	11.3406	13.4472	8.64879	15.6183	12.6734
Zswim5	542.467	0.929173	0.43826	2.12014	0.0339943	0.166373	37.6055	17.1244	59.0886	16.9417	14.7668	15.8784	38.9612	18.5531
Foxl2	48.2318	0.928446	1.53979	0.602969	0.546529	0.758336	4.39196	0.474197	11.5421	0.20745	1.63378	1.0175	0	0.197636
Sgsh	71.2413	0.927875	0.946385	0.980441	0.326869	0.586457	4.71446	2.47314	5.34037	2.6277	4.46146	2.22244	4.34155	2.56927
Dhx57	2370.19	0.92772	0.20018	4.63443	3.57916e-06	8.9108e-05	157.047	82.0836	135.577	82.7725	180.846	84.078	154.717	79.4004
4931408A02Rik	29.7236	0.927212	1.75718	0.527671	0.597728	0.791649	2.25558	0.743257	0	1.00267	4.39863	0.214211	2.36812	1.01289
Adprhl2	324.596	0.925961	0.473738	1.95459	0.050632	0.211923	21.6223	11.1265	25.8405	11.7555	15.458	10.9516	23.5684	10.6724
Wdr33	1555.02	0.925921	0.237607	3.89686	9.74477e-05	0.00175103	102.847	54.0399	89.925	57.3599	109.966	50.9288	108.652	53.8312
Phlda1	1253.35	0.925815	0.315375	2.9356	0.00332906	0.032373	85.9509	40.5011	137.127	46.4342	40.1532	38.21	80.5724	36.8592
Clstn3	4855.75	0.925158	0.173534	5.33127	9.7529e-08	3.16343e-06	321.647	168.254	380.545	153.444	303.38	184.141	281.017	167.176
Myh11	63.7306	0.924978	1.28432	0.720206	0.471398	0.703397	5.05394	1.3759	0	1.07182	6.5351	1.49948	8.62672	1.55639
Snai2	161.622	0.924965	0.733347	1.26129	0.207204	0.463609	11.6171	4.68911	22.9119	4.0107	3.70741	3.85581	8.23203	6.20084
Nespas	59.0843	0.924393	1.14779	0.805368	0.420607	0.663436	4.34525	1.61582	9.13032	1.14097	2.89053	1.60659	1.01491	2.09989
Sacs	1041.7	0.924209	0.326207	2.83319	0.00460856	0.0417604	70.6648	34.4335	49.097	33.6069	112.039	33.5509	50.8582	36.1427
Rhpn1	166.963	0.923938	0.741995	1.24521	0.213055	0.472037	11.9554	4.88965	17.227	5.18625	2.5135	4.73943	16.1258	4.74327
Kank2	343.92	0.923811	0.469654	1.967	0.0491829	0.207925	23.0868	11.6116	30.3195	11.5826	14.0756	10.6035	24.8652	12.6487
Ythdc1	2801.81	0.923702	0.20598	4.48442	7.3112e-06	0.000168237	185.762	96.9147	202.762	97.4669	146.411	103.303	208.112	89.9739
Arhgap11a	127.392	0.923566	0.799154	1.15568	0.247812	0.51086	9.18114	3.67152	18.7774	3.3192	4.64998	3.98969	4.11601	3.70568
Osbpl7	475.532	0.923534	0.46759	1.97509	0.0482575	0.205848	34.0581	13.9187	69.0803	16.5268	19.731	12.2101	13.363	13.0193
Scfd1	928.972	0.922384	0.304151	3.03265	0.00242414	0.0252735	61.5278	32.197	76.8325	33.2266	50.5214	36.3624	57.2295	27.0021
App	16174.4	0.9222	0.11711	7.87462	3.41774e-15	2.23172e-13	1066.17	565.685	974.36	476.374	1159.73	651.711	1064.41	568.97
Pyroxd2	53.5073	0.922068	1.13466	0.812641	0.416424	0.660388	3.64553	1.75288	1.37816	2.17822	3.58174	1.17816	5.97668	1.90225
Gxylt1	635.681	0.921999	0.357036	2.58237	0.00981234	0.0721057	42.1384	21.996	51.3365	19.5694	39.839	22.6529	35.2398	23.7658
Ift140	976.545	0.921472	0.286416	3.21725	0.00129426	0.0157041	64.7303	33.7942	55.2987	32.3968	79.2381	34.6219	59.654	34.364
Ubtf	2988.42	0.921267	0.213186	4.32142	1.55029e-05	0.000333056	198.438	103.066	245.829	98.3312	151.69	113.853	197.794	97.0147
Add3	3171.57	0.920748	0.17832	5.16345	2.42435e-07	7.2623e-06	209.171	110.812	194.148	108.22	218.486	124.162	214.879	100.053
Naaa	243.366	0.919967	0.694641	1.32438	0.185377	0.438321	18.5432	6.0102	41.5171	5.42827	3.45606	6.10503	10.6565	6.49729
Bdh2	68.1331	0.919639	1.35843	0.676988	0.498414	0.723234	5.89485	0.979156	14.4707	0.898949	0	0.803293	3.21387	1.23523
Anxa2	216.341	0.91962	0.565003	1.62764	0.103602	0.31934	14.2356	7.59132	14.2984	8.98949	13.6357	7.01542	14.7725	6.76904
Pdcd6ip	2697.71	0.919573	0.193783	4.74536	2.08133e-06	5.40782e-05	178.93	93.2444	221.195	97.3286	171.986	97.5197	143.609	84.8848
Wdr25	149.053	0.919501	0.68754	1.33738	0.181099	0.433613	9.85388	5.18425	7.23534	6.11977	9.86549	4.09679	12.4608	5.33618
Foxf2	71.544	0.91861	0.968877	0.948119	0.343069	0.600754	4.73844	2.4797	4.13448	2.3511	6.47226	1.90113	3.60856	3.18688
Pdk4	120.466	0.91802	0.761456	1.20561	0.227967	0.48954	8.15356	4.00035	12.2312	4.63305	4.33579	3.90936	7.89373	3.45863
Mll1	6038.56	0.916691	0.194329	4.7172	2.39109e-06	6.08781e-05	401.024	208.212	271.498	215.99	464.998	172.842	466.576	235.805
Cndp2	1068.88	0.916163	0.282994	3.2374	0.00120625	0.0148296	70.6909	37.1493	71.3198	37.9287	58.3761	38.9329	82.3767	34.5863
Ndrg1	771.548	0.915066	0.387042	2.36426	0.0180663	0.110461	53.9406	23.9015	101.467	25.6201	30.9789	25.3573	29.3759	20.7271
AA467197	9.23924	0.914399	3.26845	0.279765	0.779658	0.896634	0.861351	0.0708045	2.58405	0.1383	0	0	0	0.0741136
Thnsl2	59.2666	0.9143	1.17569	0.777669	0.436764	0.676432	4.38988	1.58958	5.51264	1.5213	0.439863	1.74047	7.21712	1.50698
Psmc3ip	211.972	0.914193	0.566194	1.61463	0.106391	0.323982	13.9991	7.38692	17.7438	9.12779	13.2587	6.88154	10.9948	6.15143
Thop1	796.327	0.913818	0.307792	2.96895	0.00298822	0.0298181	52.6159	27.7262	47.8911	27.2451	63.2145	30.0432	46.7421	25.8903
Orc1	29.9291	0.913745	1.60744	0.568448	0.569731	0.774222	2.35434	0.665234	4.99583	0.795224	2.0108	0.508752	0.0563838	0.691727
Spata13	602.385	0.913599	0.378514	2.41365	0.0157936	0.100442	40.3508	20.4244	29.4582	21.3673	59.0044	20.2162	32.5898	19.6895
Mcm7	268.302	0.913579	0.509127	1.7944	0.0727489	0.261678	17.6585	9.41077	17.3993	8.19427	18.0972	9.61274	17.479	10.4253
Plekhg5	858.52	0.913486	0.330695	2.76232	0.00573921	0.0492196	57.1718	29.4451	65.1181	29.3542	37.891	31.4355	68.5063	27.5456
Fastkd5	165.793	0.912872	0.737744	1.23738	0.215945	0.475589	11.9867	4.74037	23.7733	4.59847	8.86009	4.63232	3.32664	4.99032
Ambra1	1921.57	0.912668	0.211027	4.32488	1.52614e-05	0.000328341	126.718	67.1507	111.976	64.1366	133.027	70.0204	135.152	67.2951
Npas2	357.461	0.912456	0.478765	1.90585	0.0566695	0.227166	24.2521	11.8125	35.1431	12.4816	12.1276	10.9248	25.4855	12.0311
Zpbp	136.812	0.911889	0.704361	1.29463	0.195447	0.451134	9.08133	4.72172	11.5421	5.1171	9.0486	4.23068	6.65328	4.81738
Slc35d3	135.811	0.911803	0.862719	1.0569	0.290559	0.553856	10.6635	3.03863	24.8069	2.6277	1.31959	2.43665	5.86391	4.05154
Neurl4	3306.07	0.911679	0.204274	4.46302	8.08138e-06	0.000184533	218.87	114.682	227.397	112.092	167.65	124.243	261.564	107.712
Tbc1d8b	93.1914	0.911631	0.963603	0.946065	0.344116	0.601526	6.98973	2.41244	4.30675	2.38567	1.38243	2.67764	15.28	2.174
Crat	806.967	0.910989	0.30333	3.00329	0.00267077	0.0272906	53.1647	28.2509	56.8491	29.9765	46.3741	24.9824	56.271	29.7937
4922501C03Rik	526.105	0.910744	0.400521	2.2739	0.022972	0.129893	35.5065	17.5726	50.992	18.5322	36.1316	18.449	19.396	15.7368
Hspg2	264.974	0.910049	0.769364	1.18286	0.236865	0.499131	21.8274	4.90603	1.20589	4.0107	53.7889	4.28423	10.4874	6.42318
Ikbke	31.1563	0.908962	1.49942	0.60621	0.544375	0.756911	2.52112	0.622262	0.34454	0.726075	0.565538	0.37487	6.65328	0.76584
Ccdc65	406.579	0.90849	0.4489	2.02381	0.0429895	0.192258	27.3445	13.6756	39.1053	15.9391	15.0182	13.2543	27.91	11.8335
Ilf3	2741.47	0.908309	0.200499	4.53024	5.89155e-06	0.000139894	180.857	95.7319	212.237	94.0785	154.643	104.428	175.692	88.6893
Ankle1	57.4603	0.908122	1.2194	0.744731	0.456434	0.691713	4.28008	1.51714	6.71853	1.27927	0.314188	1.74047	5.80753	1.53168
Baiap2l1	82.4999	0.908109	1.30652	0.695062	0.487016	0.714989	6.97344	1.35005	16.7102	1.34842	4.21011	1.39237	0	1.30934
Zfp287	730.503	0.907736	0.317541	2.85864	0.00425456	0.0390517	48.0701	25.6311	47.7188	25.2052	47.945	24.9824	48.5464	26.7056
Ecm1	31.7848	0.906458	1.51016	0.60024	0.548346	0.75928	2.40303	0.803769	0.34454	1.00267	1.5081	0.963951	5.35646	0.444682
Sart3	1335.09	0.905644	0.252956	3.58024	0.000343279	0.00523047	87.9006	46.7976	76.1434	40.7293	83.6996	53.0709	103.859	46.5927
Xpnpep1	1057.3	0.902728	0.278716	3.23888	0.00120002	0.0147651	69.4845	37.1872	66.4963	37.1335	65.1625	40.7805	76.7947	33.6476
Synj1	12155.8	0.902571	0.125892	7.16942	7.53168e-13	4.24741e-11	800.105	426.302	909.414	433.086	752.668	442.347	738.233	403.474
Arid3a	419.266	0.902461	0.464449	1.94308	0.0520069	0.215018	29.1624	13.1378	12.748	10.6837	20.6107	13.3882	54.1284	15.3415
Hif1a	3771.32	0.902385	0.168427	5.35773	8.42742e-08	2.74546e-06	248.24	132.251	291.481	141.827	227.535	137.31	225.704	117.618
Slc22a8	121.06	0.9022	0.851709	1.05928	0.289471	0.552519	8.62387	3.58999	12.0589	3.5958	12.0648	3.32028	1.7479	3.85391
Ftsjd2	2118.98	0.901404	0.212118	4.24955	2.14202e-05	0.000445396	139.669	74.1167	152.287	74.2325	114.427	74.5724	152.293	73.5454
Asah2	239.198	0.901222	0.61781	1.45874	0.144637	0.384185	16.5429	7.58993	29.975	6.15435	10.7452	7.52418	8.90863	9.09127
Nop58	1307.25	0.900958	0.260084	3.46411	0.000531995	0.007536	86.3601	45.5298	102.845	49.2348	65.2882	45.0112	90.947	42.3436
Pi4ka	4393.69	0.900549	0.161214	5.58605	2.32287e-08	8.13714e-07	288.734	154.549	277.183	164.508	316.01	149.627	273.01	149.512
Spon1	1414.77	0.900079	0.260084	3.46073	0.000538715	0.00762394	93.3816	49.356	92.6813	44.1522	114.616	50.5539	72.8478	53.3618
Arhgap36	1587.47	0.899997	0.25752	3.49487	0.000474294	0.00685797	105.997	54.1643	148.841	56.046	99.9117	57.0873	69.2393	49.3597
Ipw	2284.31	0.899812	0.225846	3.98418	6.7714e-05	0.00126968	150.165	80.301	151.425	87.5784	174.123	67.1553	124.946	86.1694
Cct3	2666.98	0.899327	0.214749	4.1878	2.81675e-05	0.000569007	177.062	92.0122	242.212	93.1796	143.898	96.6629	145.075	86.1941
Adamts17	394.191	0.899056	0.444029	2.02477	0.0428912	0.191992	26.1585	13.6117	20.5001	11.3406	20.9877	15.6107	36.9877	13.8839
Fez2	1073.1	0.898884	0.355093	2.5314	0.0113607	0.0800609	73.0087	35.257	87.5132	34.8862	31.5444	36.4963	99.9684	34.3887
Specc1	2000.53	0.898831	0.246905	3.64039	0.000272227	0.0042824	133.005	68.8299	184.501	66.6606	99.6603	74.4117	114.854	65.4176
AY512931	116.521	0.89874	0.80078	1.12233	0.261722	0.524761	7.9966	3.75931	9.99167	3.14632	2.89053	3.56126	11.1076	4.57034
Tuba1b	1751.19	0.898641	0.234156	3.83779	0.000124146	0.00216935	115.541	61.1388	134.371	62.4424	122.093	58.3726	90.1576	62.6013
Rars2	332.731	0.897915	0.472793	1.89917	0.057542	0.228938	22.1008	11.4687	31.0086	11.7555	15.8979	9.53241	19.396	13.1181
Hspa12b	149.724	0.896997	0.797665	1.12453	0.260789	0.524326	11.3711	3.73471	2.23951	3.63037	5.65538	3.69515	26.2184	3.87861
Usp11	5977.75	0.895616	0.147761	6.06123	1.35085e-09	5.57105e-08	392.449	210.652	422.923	224.634	350.885	212.23	403.539	195.092
Usp5	4644.5	0.895606	0.168333	5.32045	1.03511e-07	3.32845e-06	305.766	162.822	371.414	169.659	260.524	171.717	285.358	147.091
Gad1	5992.37	0.894288	0.144538	6.18721	6.12371e-10	2.62737e-08	393.207	211.369	429.986	212.532	389.341	227.198	360.292	194.375
Vps13b	2032.32	0.893567	0.239048	3.73802	0.000185478	0.00304454	134.79	70.2527	169.858	71.0862	143.395	68.5477	91.1162	71.1243
Polr1b	341.793	0.89355	0.509182	1.75487	0.079281	0.273923	23.6209	10.8629	41.0003	12.4124	9.67698	10.1215	20.1854	10.0547
Zfhx4	5074.05	0.89352	0.152051	5.87647	4.19113e-09	1.58773e-07	333.794	178.131	402.078	195.556	277.805	160.444	321.5	178.391
Gla	104.403	0.893076	0.807173	1.10642	0.268543	0.531943	7.00342	3.52986	8.95805	3.52665	3.70741	3.15962	8.3448	3.90332
Gucy1b3	2963.41	0.892674	0.187316	4.7656	1.88291e-06	4.93909e-05	194.302	104.679	189.842	108.877	181.852	109.676	211.214	95.483
Ghsr	134.262	0.89231	0.773353	1.15382	0.248574	0.511793	9.63394	3.91187	18.9497	4.77135	7.41483	3.48094	2.53727	3.48334
Hnrnpu	11698.3	0.892248	0.125887	7.08767	1.36386e-12	7.52043e-11	767.062	413.187	691.492	406.844	816.825	449.228	792.868	383.488
Tubb3	17380.7	0.892225	0.137444	6.49156	8.49539e-11	3.95248e-09	1143.69	609.866	1376.44	593.514	968.955	644.535	1085.67	591.55
Wdr11	1413.97	0.891402	0.255699	3.48614	0.000490037	0.00704215	93.4619	49.1949	103.534	50.4795	110.657	50.0184	66.1945	47.0868
Nup155	721.25	0.890718	0.328352	2.7127	0.00667385	0.0550068	47.548	25.2196	59.95	25.7929	40.9701	24.4201	41.724	25.4457
Zzef1	1738.42	0.890505	0.2842	3.13338	0.00172807	0.0195646	116.198	59.1927	121.106	59.4344	160.11	54.9988	67.3786	63.1448
Rdh18-ps	104.431	0.890211	0.888465	1.00196	0.316361	0.578408	7.38973	3.14644	12.748	3.49207	1.69661	3.42738	7.72458	2.51986
Map3k3	476.656	0.890126	0.3921	2.27015	0.0231985	0.130529	31.4012	16.6891	25.1514	15.5242	29.4708	16.6817	39.5814	17.8614
Ppm1m	324.609	0.889681	0.513676	1.73199	0.0832759	0.281392	21.7897	10.9604	22.7397	10.1305	11.5621	12.1029	31.0675	10.6477
Nedd4l	5006.35	0.889567	0.150967	5.89245	3.80508e-09	1.44967e-07	328.372	176.723	324.212	182.66	368.668	183.767	292.237	163.742
Zmiz1	8154.92	0.889443	0.137158	6.48481	8.88466e-11	4.12071e-09	534.561	288.196	582.273	287.145	497.547	304.903	523.862	272.54
Adar	5677.71	0.889352	0.159962	5.55978	2.70116e-08	9.3523e-07	374.074	198.755	468.919	204.234	342.967	202.671	310.336	189.36
Ttc30a1	69.7369	0.889223	1.07681	0.82579	0.408923	0.65397	5.48282	1.55301	13.2648	1.72875	2.45066	1.4727	0.732989	1.45757
Enc1	6378.89	0.88916	0.14956	5.94516	2.76183e-09	1.07079e-07	418.277	225.295	368.83	235.767	449.477	222.941	436.523	217.178
Iars2	796.091	0.889159	0.306734	2.8988	0.00374594	0.0353196	52.1452	28.1732	51.8533	28.1786	50.9612	29.5612	53.621	26.7797
Runx3	11.9574	0.88896	2.15908	0.41173	0.680537	0.841515	0.848114	0.358276	1.7227	0.172875	0.314188	0.481976	0.507454	0.419977
Chd5	15326.8	0.888485	0.122679	7.24235	4.40979e-13	2.55459e-11	1004.23	542.096	1017.77	520.907	930.121	574.729	1064.81	530.653
Lrwd1	217.829	0.887399	0.580923	1.52757	0.12662	0.357138	14.5647	7.41221	10.853	7.15702	10.6824	7.47062	22.1588	7.609
Nek6	563.325	0.886445	0.415498	2.13345	0.0328878	0.163157	38.3202	18.5142	63.5677	20.0535	19.4796	19.0113	31.9132	16.4779
Noc2l	1471.95	0.886263	0.276436	3.20604	0.00134577	0.0162102	97.5463	50.9603	127.48	46.6416	99.4718	53.1244	65.6871	53.1147
Ubap2	2061.54	0.885798	0.204658	4.32818	1.50343e-05	0.000324393	135.225	72.7657	161.762	82.1847	126.241	68.5209	117.673	67.5916
Tsc2	2432.22	0.885767	0.238899	3.7077	0.000209149	0.00339936	161.535	83.8535	206.38	82.3922	176.511	83.2211	101.716	85.9471
Uba6	812.083	0.885745	0.326477	2.71304	0.00666693	0.0550068	53.7038	28.228	67.7022	32.1547	35.5032	27.5529	57.9061	24.9763
Bsn	8404.68	0.88527	0.129921	6.81393	9.4969e-12	4.89238e-10	550.2	297.756	544.546	284.206	524.568	299.119	581.486	309.943
Dpysl5	6860.77	0.884813	0.137869	6.4178	1.38262e-10	6.33367e-09	448.882	243.308	438.6	250.219	453.31	250.199	454.735	229.505
Fat4	1168.78	0.883597	0.266086	3.32072	0.000897851	0.0116744	76.4427	41.4767	82.5174	36.8915	72.8915	41.9587	73.9191	45.5799
Ets2	1503.06	0.883337	0.231243	3.81994	0.000133482	0.00231724	98.3535	53.2913	102.845	55.1471	101.043	54.6507	91.1725	50.0761
Tmc6	21.3086	0.883126	1.95624	0.45144	0.651673	0.822582	1.88671	0.263131	0	0.103725	5.15268	0.240988	0.507454	0.444682
Lamc3	44.6705	0.882921	1.42118	0.621259	0.53443	0.75019	3.60144	0.905407	0	0.48405	7.47766	1.07106	3.32664	1.16111
Sipa1l3	2717.73	0.882154	0.191724	4.60118	4.20107e-06	0.000102702	177.475	96.7194	173.993	108.531	172.929	95.1366	185.503	86.4906
Chd1	1244.4	0.881974	0.286473	3.07874	0.00207878	0.022492	82.4352	43.1135	104.223	42.2852	89.2921	43.0565	53.7901	43.9988
1110032F04Rik	112.38	0.880952	0.923856	0.95356	0.340306	0.597956	8.27542	3.06271	11.5421	2.97345	0.879725	3.05251	12.4044	3.16218
Sik3	5827.18	0.880799	0.148006	5.9511	2.66354e-09	1.03808e-07	381.952	205.957	409.314	216.543	421.64	209.177	314.903	192.152
Mybpc1	23.3455	0.880392	1.86804	0.471291	0.637433	0.814679	1.98929	0.366055	0	0.449475	5.40403	0.401646	0.563838	0.247045
Farp1	2641.17	0.87847	0.19479	4.50983	6.48804e-06	0.000151164	173.057	93.4133	140.917	91.7966	185.308	90.6382	192.945	97.8052
Odz3	3613.59	0.877225	0.172041	5.09894	3.41557e-07	1.00496e-05	236.567	128.011	204.312	125.196	271.961	130.669	233.429	128.167
Nynrin	1339.74	0.876861	0.248482	3.52887	0.000417346	0.00615192	87.6252	47.5422	89.7527	48.5087	95.7644	45.8948	77.3585	48.2232
Wdr91	777.508	0.876724	0.411125	2.1325	0.0329657	0.16338	54.5772	23.8663	106.118	23.7184	31.7329	23.0277	25.8801	24.8528
Tnfaip3	74.8601	0.875893	0.950824	0.921193	0.356949	0.612313	4.93445	2.61825	3.4454	3.38835	4.08444	2.16889	7.27351	2.29752
Tgs1	1061.21	0.874695	0.268719	3.25505	0.00113372	0.0141127	69.2574	37.8087	72.3534	40.5564	67.9274	36.9247	67.4914	35.9451
Cryl1	150.087	0.874683	0.676132	1.29366	0.195784	0.451262	9.92067	5.22173	13.7816	5.3937	7.91753	5.35529	8.06288	4.9162
Dnajc13	2235.4	0.874102	0.203647	4.29224	1.76882e-05	0.00037674	146.043	79.4884	142.123	79.315	134.409	82.4178	161.596	76.7323
Usp15	2636.82	0.87321	0.196235	4.44983	8.59398e-06	0.000195339	172.312	93.7191	183.64	98.4695	147.794	96.0738	185.503	86.6141
Fancm	488.119	0.87279	0.392666	2.22273	0.0262342	0.141666	31.9127	17.334	37.3826	16.6997	30.7275	15.9588	27.628	19.3436
Cbr1	1236.22	0.871624	0.312263	2.79131	0.00524947	0.0462724	82.9755	41.748	130.236	39.9341	67.5503	44.1276	51.1401	41.1825
Hhipl1	157.707	0.87159	0.659603	1.32138	0.186373	0.439108	10.4372	5.47403	8.78578	5.42827	7.41483	4.79298	15.1108	6.20084
Dock4	2671.56	0.871477	0.184734	4.71747	2.38801e-06	6.08781e-05	174.387	95.1492	187.774	99.5759	175.819	94.1191	159.566	91.7526
Dnm3	8499.02	0.870326	0.133483	6.52014	7.0244e-11	3.29903e-09	555.132	302.341	595.882	307.13	586.588	306.108	482.927	293.786
Acadvl	687.132	0.86945	0.327851	2.65197	0.0080024	0.0628394	44.8539	24.4715	49.9583	24.9977	42.541	24.8485	42.0623	23.5681
Qpctl	247.308	0.8692	0.599028	1.45102	0.146775	0.387219	16.9404	8.01069	29.8027	6.70755	12.5047	9.34497	8.51395	7.97956
Taf15	996.389	0.868851	0.334974	2.59379	0.00949256	0.0708042	65.6837	34.8429	75.7988	28.0403	40.3417	39.6291	80.9107	36.8592
D030016E14Rik	1712.29	0.868554	0.240314	3.61425	0.000301218	0.00467626	112.468	60.2867	81.1392	59.6764	143.835	66.1913	112.429	54.9923
Ddit4l	107.644	0.867199	0.804712	1.07765	0.281189	0.543681	7.1975	3.66276	9.13032	3.76867	8.79725	3.58804	3.66494	3.63157
Kpna6	2721.94	0.866053	0.202587	4.27497	1.91161e-05	0.000402548	178.687	95.9313	229.292	100.544	168.405	91.8164	138.366	95.4336
Rpa2	243.315	0.865151	0.654268	1.32232	0.186062	0.438891	18.0913	6.45694	41.0003	6.46552	5.71821	6.82799	7.55542	6.07731
Stat3	1364.57	0.864984	0.246748	3.50553	0.000455699	0.00663191	88.9816	48.6911	104.74	52.7268	79.4895	50.9288	82.715	42.4177
Crim1	2034.69	0.864693	0.227766	3.79642	0.000146803	0.00251798	133.236	72.046	162.278	68.4585	105.379	74.974	132.051	72.7054
Gpr45	370.525	0.861319	0.472042	1.82466	0.0680517	0.252531	24.9427	12.4399	40.828	12.9656	14.8297	11.4335	19.1705	12.9205
Myo16	2463.6	0.860587	0.204578	4.20665	2.59183e-05	0.000531503	161.359	87.1955	164.862	90.5519	198.441	90.1027	120.774	80.932
Nrd1	3897.92	0.86011	0.168528	5.10368	3.33119e-07	9.84023e-06	253.936	139.328	228.43	134.151	244.187	145.958	289.192	137.876
Ap1g1	3934.01	0.85974	0.16217	5.30149	1.14863e-07	3.6855e-06	255.825	141.081	248.413	146.598	266.18	143.736	252.881	132.91
Rnf39	37.916	0.859608	1.27935	0.671912	0.50164	0.726075	2.51896	1.30642	1.20589	0.933524	3.64458	1.23172	2.70642	1.75402
Sdk2	638.007	0.859502	0.345641	2.48669	0.0128939	0.0872961	41.6339	22.7352	46.1684	21.9205	44.6775	23.1616	34.0558	23.1234
Raph1	5162.57	0.859282	0.154646	5.55645	2.75316e-08	9.51021e-07	335.316	185.54	330.586	207.519	345.292	170.512	330.071	178.589
Trpc2	205.499	0.859077	0.777545	1.10486	0.269221	0.532645	15.5115	5.22144	34.6263	5.08252	9.99117	4.25745	1.91705	6.32436
Lta4h	847.672	0.858783	0.298597	2.87606	0.00402679	0.0373992	55.0773	30.4452	57.0214	32.8117	53.3491	30.9536	54.8614	27.5703
Sik1	1330.05	0.858779	0.243455	3.52746	0.000419571	0.00617861	86.5076	47.682	94.5763	51.7242	80.9347	44.8773	84.0118	46.4445
Aqp3	11.2512	0.858665	2.16649	0.396338	0.691855	0.848885	0.722182	0.412956	0.51681	0.5532	0.691213	0.240988	0.958524	0.444682
Six2	52.5134	0.858467	1.14683	0.748554	0.454126	0.689901	3.83108	1.46704	1.20589	1.27927	8.48306	1.71369	1.80428	1.40816
Dock1	761.092	0.858395	0.316902	2.70871	0.00675457	0.0554672	49.5091	27.2782	45.6516	28.9393	48.0707	26.8568	54.805	26.0386
Fads6	145.455	0.857988	0.872031	0.983897	0.325166	0.584883	11.032	3.64313	23.4287	3.0426	8.48306	3.90936	1.18406	3.97743
Fastkd1	407.754	0.857925	0.433926	1.97712	0.0480276	0.205156	27.0949	14.0438	42.2062	16.6997	18.16	13.5489	20.9184	11.8829
Srgap2	3663.9	0.85766	0.190362	4.5054	6.6247e-06	0.000153627	240.1	129.554	303.195	127.893	236.395	134.578	180.71	126.191
Vps53	1552.63	0.857289	0.283232	3.0268	0.00247154	0.0256734	104.053	52.5924	168.136	54.8359	69.3726	53.2851	74.6521	49.6561
Sqstm1	8487.58	0.856545	0.145365	5.89236	3.80722e-09	1.44967e-07	553.699	302.62	685.118	311.935	509.235	328.868	466.745	267.056
Trim32	4833.77	0.85645	0.160579	5.33353	9.63235e-08	3.13115e-06	314.394	173.289	346.091	172.633	283.711	184.998	313.381	162.235
Yap1	254.312	0.856234	0.526738	1.62554	0.104047	0.31998	16.6582	8.99949	15.1598	9.36982	12.8817	8.16681	21.9333	9.46184
Ptk7	246.193	0.856155	0.564489	1.51669	0.129345	0.360885	16.2019	8.63678	16.5379	6.5001	9.73982	9.80017	22.328	9.61006
Dclk1	17134.6	0.855974	0.113645	7.53202	4.99612e-14	3.02367e-12	1114.32	614.403	1119.76	638.462	1224.14	634.789	999.064	569.958
Ezh1	1010.62	0.855576	0.281956	3.03443	0.0024099	0.0251957	65.8688	36.0935	72.3534	37.0644	54.0403	35.9875	71.2127	35.2287
Nrp1	1207.94	0.853842	0.322728	2.6457	0.00815228	0.0637119	81.5769	40.2929	137.127	40.5219	47.4423	40.1379	60.1615	40.219
Scrib	919.774	0.853453	0.307519	2.77528	0.00551541	0.0478476	59.869	32.9278	47.202	36.6149	69.8753	32.7208	62.5296	29.4478
Cd84	105.7	0.852877	0.887802	0.960662	0.336722	0.59444	7.93161	2.73258	4.30675	2.45482	1.44526	2.3831	18.0428	3.35982
Hspa1b	54.4001	0.852557	1.38413	0.61595	0.537927	0.75221	4.16097	1.3275	0	1.48672	7.35199	1.28527	5.13092	1.21052
Rnu11	51.5172	0.852154	1.13008	0.754069	0.450808	0.687174	3.51612	1.68149	6.20172	1.5213	1.69661	1.4727	2.65004	2.05048
Sorcs3	936.461	0.851762	0.324608	2.62397	0.00869104	0.0667981	61.9275	32.553	90.0973	31.2904	52.7207	33.0421	42.9644	33.3264
Notch4	100.411	0.851344	0.873516	0.974617	0.32975	0.589001	7.11934	3.0112	14.4707	2.80057	2.82769	2.65087	4.05963	3.58216
BC031353	1371.21	0.851143	0.24603	3.45951	0.00054115	0.00765114	89.0996	49.2434	94.5763	48.889	79.2381	51.0626	93.4843	47.7786
Aldh1l2	283.083	0.851123	0.497492	1.71083	0.0871132	0.288625	18.4635	10.097	14.4707	9.05864	17.9715	10.3625	22.9482	10.87
Nav2	3150.97	0.851101	0.174583	4.87506	1.08778e-06	2.98247e-05	204.403	113.501	204.657	110.502	198.692	106.356	209.86	123.646
Las1l	1215.49	0.850385	0.290021	2.93215	0.00336629	0.0326497	80.553	42.0785	120.245	44.0831	67.1733	40.9947	54.2412	41.1577
Pld2	550.862	0.849725	0.440361	1.92961	0.0536551	0.219094	37.6254	17.9516	62.0172	17.5295	35.6917	19.279	15.1672	17.0461
Abca7	152.627	0.849134	0.679512	1.24962	0.211437	0.469692	10.1206	5.27806	6.8908	5.22082	15.5209	5.62305	7.95011	4.99032
Lrrc16b	2545.23	0.848666	0.191838	4.42387	9.69486e-06	0.000217375	165.178	91.6118	150.909	92.004	167.525	94.735	177.101	88.0964
Fam123c	1161.79	0.848501	0.27464	3.08951	0.0020049	0.0219316	75.7182	41.4954	94.404	40.349	66.1051	45.2522	66.6456	38.8849
Atg2a	1150.19	0.847956	0.269	3.15225	0.0016202	0.0186411	74.7428	41.301	86.1351	38.8277	69.8125	43.9669	68.2807	41.1083
Epb4.1l4a	574.279	0.847921	0.406128	2.08782	0.0368144	0.174374	37.843	20.0965	34.454	20.3992	24.9465	22.5725	54.1284	17.3179
Ankfy1	1752.17	0.847727	0.218526	3.8793	0.000104757	0.00186557	113.62	63.1587	109.908	65.6233	111.474	60.1399	119.477	63.713
Csf2rb2	100.81	0.847419	0.867078	0.977326	0.328408	0.587315	7.035	3.13581	11.7144	3.0426	1.94796	2.75797	7.44266	3.60686
Mta3	1611.73	0.846578	0.235649	3.59254	0.000327472	0.00502619	104.729	57.88	124.379	57.8785	94.6333	63.1656	95.1758	52.5959
Solh	604.181	0.845624	0.373166	2.26608	0.0234465	0.131526	39.75	21.2063	49.4415	21.2982	24.758	20.7785	45.0506	21.5424
Nup153	1695.33	0.845074	0.284503	2.97035	0.00297463	0.0297024	111.848	59.1952	63.9122	63.618	125.487	57.5425	146.147	56.4252
Rcc1	274.77	0.844896	0.522737	1.61629	0.106031	0.32315	18.0555	9.66624	25.6682	10.3725	12.3162	10.5231	16.1821	8.10309
Pom121	1662.13	0.844429	0.279365	3.02267	0.00250553	0.0259224	109.622	58.0712	139.367	55.0434	125.109	58.0513	64.3903	61.119
Immt	3261.8	0.844142	0.17579	4.80199	1.57098e-06	4.17655e-05	211.553	117.533	231.876	114.754	207.301	122.154	195.482	115.691
Ptpn21	292.423	0.843869	0.54082	1.56035	0.118677	0.343892	19.8448	9.65805	9.99167	9.95759	14.6411	8.863	34.9015	10.1536
Sim1	954.865	0.84359	0.28556	2.95416	0.00313523	0.0309737	61.841	34.4962	58.7441	34.817	65.6024	31.8372	61.1764	36.8345
Astn2	868.075	0.8433	0.317873	2.65295	0.00797924	0.0627217	56.1567	31.4241	63.5677	25.378	49.1389	36.6302	55.7635	32.2641
Tab3	737.386	0.843135	0.32955	2.55845	0.0105141	0.075877	48.2678	26.1277	64.9458	27.5217	43.5464	27.071	36.3111	23.7905
Pdzd2	1827.08	0.843112	0.239358	3.52239	0.000427668	0.00627921	119.153	65.1827	129.203	64.344	140.128	63.5137	88.1278	67.6904
Nsf	17589.9	0.842693	0.131322	6.41698	1.39006e-10	6.33543e-09	1143.87	630.798	1417.96	649.387	1022.37	675.542	991.283	567.463
Acr	101.05	0.842123	0.998805	0.843131	0.399155	0.646851	7.5415	2.65352	6.54626	2.00535	15.458	2.89185	0.620221	3.06336
Naa15	1596.11	0.841942	0.24641	3.41683	0.000633545	0.00872546	104.071	56.9617	115.249	58.8466	76.4733	56.8731	120.492	55.1652
Snhg9	13.3328	0.841922	2.26559	0.371613	0.710181	0.85891	1.02838	0.316776	0	0.242025	0.942563	0.214211	2.14258	0.494091
Aptx	945.41	0.841371	0.312391	2.69333	0.00707426	0.0573335	61.9144	33.4688	41.5171	33.8835	80.1178	33.1224	64.1083	33.4005
Emd	557.602	0.841233	0.383336	2.1945	0.0281993	0.148665	36.492	19.765	44.4457	23.3035	23.2499	18.7971	41.7804	17.1944
Esam	41.2235	0.839691	1.22626	0.684758	0.493497	0.719395	2.72939	1.42968	1.7227	1.34842	4.21011	1.60659	2.25535	1.33404
AU023762	160.932	0.839438	0.857626	0.978792	0.327683	0.58679	12.7838	3.45271	32.0422	2.59312	4.33579	3.2935	1.97343	4.47152
Hspb1	140.613	0.839276	0.994497	0.84392	0.398714	0.646488	10.5468	3.63976	14.2984	3.21547	0.314188	4.41811	17.0279	3.2857
Hspa12a	5914.08	0.839092	0.151657	5.53281	3.1514e-08	1.0761e-06	384.115	212.562	468.919	225.014	343.093	217.21	340.332	195.462
Mkrn3	595.254	0.839054	0.373879	2.24419	0.0248204	0.136508	39.0586	20.9971	23.601	19.7769	53.0349	24.9824	40.5399	18.2319
Myo1e	234.273	0.837854	0.632511	1.32465	0.185288	0.438321	15.918	7.71809	5.1681	8.40172	19.9195	8.03293	22.6663	6.71963
Sf3a2	923.217	0.8375	0.299877	2.79281	0.00522517	0.0461128	59.6593	33.4849	66.1517	29.6653	54.92	39.0936	57.9061	31.6959
Mbd1	655.891	0.83726	0.340405	2.4596	0.0139091	0.0921988	42.4609	23.7125	37.2103	23.3381	42.4153	25.8125	47.757	21.987
Sart1	1532.17	0.837148	0.257822	3.247	0.00116629	0.0144337	98.9092	55.6732	92.3368	51.9662	89.4806	67.7444	114.91	47.3092
Kif21b	6514.44	0.836937	0.162558	5.14855	2.62507e-07	7.81641e-06	423.025	234.223	470.47	221.314	334.735	243.13	463.869	238.226
Cbr4	170.235	0.836055	0.714714	1.16978	0.242091	0.503881	11.6899	5.48531	11.0253	5.73945	4.08444	5.99792	19.9599	4.71857
Dpysl3	5442.38	0.835064	0.147286	5.66968	1.43062e-08	5.11998e-07	352.407	196.68	298.372	173.082	410.455	212.873	348.395	204.084
Hsp90ab1	53710.4	0.835047	0.11639	7.17455	7.25446e-13	4.10663e-11	3467.81	1951.08	3704.15	1762.6	3379.84	2222.98	3319.42	1867.66
Rbm26	2068.68	0.834394	0.211625	3.9428	8.05351e-05	0.00147479	134.188	74.5228	158.488	75.4772	130.011	74.8669	114.064	73.2242
Htatip2	142.595	0.834177	0.7337	1.13695	0.255561	0.519174	9.59965	4.78694	9.64713	4.80592	4.21011	5.03397	14.9417	4.52093
Ehbp1	2807.5	0.834091	0.205347	4.06186	4.86836e-05	0.000937518	182.018	101.233	216.716	97.9509	150.433	111.845	178.906	93.9019
Hmgcs1	6398.17	0.833864	0.13832	6.02853	1.65455e-09	6.67558e-08	413.71	231.807	454.793	250.53	411.272	229.072	375.065	215.819
Fgd5	805.021	0.833702	0.346136	2.4086	0.016014	0.101454	53.0464	28.1729	78.3829	26.4153	42.4153	29.9896	38.341	28.1138
Mon2	2031.58	0.833537	0.232832	3.58	0.000343592	0.00523047	132.427	72.5414	160.9	73.1607	141.824	70.4488	94.5556	74.0148
Rgl2	270.028	0.833011	0.534951	1.55717	0.119429	0.3455	18.1537	9.08974	31.3532	10.4416	11.4364	7.71161	11.6714	9.11597
Tie1	14.9527	0.83299	2.16709	0.384381	0.700696	0.854744	1.15949	0.349096	0	0.06915	2.57634	0.508752	0.90214	0.469386
Dhx8	1359.88	0.832622	0.250605	3.32245	0.000892311	0.0116227	88.2664	48.9335	67.5299	46.2267	104.687	53.3386	92.5821	47.2351
Ptpn22	36.0886	0.832327	1.60275	0.519311	0.603544	0.794128	3.21444	0.426572	0	0.4149	0.565538	0.321317	9.07779	0.5435
Corin	24.1107	0.832312	1.88523	0.44149	0.658858	0.827352	1.84387	0.588684	3.4454	0.726075	0	0.669411	2.0862	0.370568
Sv2a	6306.97	0.832223	0.149844	5.55392	2.79333e-08	9.60443e-07	407.594	228.722	438.944	211.53	375.957	241.55	407.88	233.087
Tmem74	123.629	0.831948	0.748554	1.11141	0.266393	0.529727	8.219	4.25404	13.0925	4.52932	6.09524	4.23068	5.46922	4.00213
2810468N07Rik	328.01	0.831794	0.492953	1.68737	0.0915322	0.2978	21.6029	11.4903	31.6977	10.5799	14.9553	11.8352	18.1556	12.0558
Ofd1	359.675	0.831654	0.454736	1.82887	0.0674187	0.251246	23.5616	12.7264	15.6766	10.7874	21.7418	13.656	33.2664	13.7357
Kcnk4	50.8088	0.831557	1.14494	0.726287	0.467663	0.70053	3.36917	1.75697	5.34037	1.21012	1.94796	2.03501	2.81919	2.02577
Ina	4778.51	0.831114	0.151989	5.46824	4.54519e-08	1.53793e-06	308.532	173.576	303.368	174.223	311.611	181.973	310.618	164.532
Mus81	244.664	0.830816	0.543286	1.52924	0.126205	0.356666	15.9714	8.71298	14.8152	9.30067	21.4276	8.48813	11.6714	8.35013
3110002H16Rik	581.172	0.83081	0.392059	2.1191	0.0340823	0.166694	38.1351	20.4999	39.4499	20.745	23.8154	21.6086	51.1401	19.146
Rdx	3212.75	0.830565	0.175668	4.72804	2.26698e-06	5.84937e-05	207.367	116.77	221.195	113.925	212.642	131.044	188.265	105.34
Grid2ip	154.407	0.829923	0.671773	1.23542	0.216673	0.476771	10.2131	5.36513	6.20172	4.77135	16.1492	6.50667	8.28841	4.81738
Tmem145	848.562	0.829907	0.305423	2.71724	0.00658292	0.0545693	54.9309	30.6813	44.618	30.9792	61.1409	31.8639	59.0338	29.2008
Cpsf3	1655.39	0.829278	0.273682	3.03008	0.00244491	0.0254189	109.753	57.2615	168.652	58.7429	93.5651	58.3458	67.0403	54.6958
Tmem120b	96.4055	0.82909	0.841639	0.98509	0.32458	0.584563	6.33386	3.39258	9.13032	3.0426	5.5297	3.45416	4.34155	3.68098
Ppox	85.9384	0.828745	0.909681	0.911027	0.362281	0.61665	5.91498	2.75542	2.75632	2.93887	11.4364	3.07929	3.55218	2.24811
Fzr1	2242.45	0.828647	0.237399	3.49053	0.000482072	0.00695454	146.145	80.0983	169.342	79.2804	99.6603	84.8009	169.433	76.2135
Hr	794.974	0.828122	0.322822	2.56526	0.01031	0.074839	51.8722	28.3335	66.8408	28.4552	52.972	30.6055	35.8037	25.9398
Flot1	3449.58	0.82806	0.174108	4.75602	1.97446e-06	5.15714e-05	222.513	125.519	211.031	126.648	222.57	134.712	233.936	115.197
Cpa4	34.4738	0.827794	1.41074	0.586778	0.557353	0.765662	2.48954	0.988552	5.1681	0.968099	0.439863	1.23172	1.86066	0.76584
Phlpp1	2441.38	0.827771	0.219396	3.77295	0.000161329	0.0027109	158.361	87.9517	136.955	93.8711	137.74	88.6568	200.388	81.3273
Atp5a1	19654.7	0.827397	0.141767	5.83631	5.33684e-09	1.99635e-07	1272.02	710.96	1534.41	697.516	1064.15	787.093	1217.49	648.272
Sugp1	1159.81	0.826781	0.365549	2.26175	0.0237126	0.13247	79.678	37.3363	25.6682	33.6415	132.399	39.0133	80.9671	39.3543
Ftsj2	232.359	0.826474	0.605519	1.3649	0.172284	0.423121	15.7722	7.67076	16.1934	8.36714	6.0324	7.28319	25.0908	7.36195
AI467606	74.3338	0.826319	1.21857	0.678105	0.497705	0.722683	5.81489	1.68471	0	1.2447	7.35199	1.66014	10.0927	2.14929
AW555464	14121	0.82625	0.131576	6.27963	3.39373e-10	1.4817e-08	912.26	512.417	1023.63	496.393	806.331	542.196	906.82	498.661
Dkk2	71.8397	0.825858	0.999765	0.826052	0.408774	0.653899	5.09403	2.15394	10.5085	2.14365	2.0108	2.16889	2.7628	2.14929
Ddx1	3898.89	0.825456	0.169898	4.85855	1.1825e-06	3.22436e-05	251.125	142.238	265.641	128.861	260.901	166.228	226.832	131.626
Prpf40b	1710.15	0.824826	0.243883	3.38206	0.000719453	0.00970219	111.508	61.0305	150.909	63.2031	84.8306	61.5858	98.7843	58.3027
Tufm	1618.53	0.82445	0.253702	3.24967	0.00115537	0.0143343	105.439	57.8558	140.572	56.6684	94.9475	56.7928	80.7979	60.1061
Adam11	987.961	0.824446	0.306513	2.68976	0.0071503	0.0577297	64.1356	35.5407	82.6897	31.4978	56.4909	37.3263	53.2263	37.7979
Herc6	93.5276	0.824425	0.878824	0.9381	0.348193	0.605336	6.57077	2.86531	13.4371	3.25005	3.45606	2.99896	2.81919	2.34693
3110082D06Rik	248.066	0.824229	0.586371	1.40564	0.15983	0.406274	16.6573	8.3703	23.9455	7.84852	6.91213	8.54168	19.1141	8.7207
Mccc1	382.123	0.824125	0.442578	1.8621	0.0625892	0.239976	24.8436	13.7091	29.8027	14.1412	17.7202	13.8434	27.0078	13.1428
Rrp12	1007.23	0.824105	0.284819	2.89343	0.00381061	0.0357933	65.1675	36.4528	77.177	35.059	62.9004	38.4777	55.4252	35.8216
Usp9x	13610	0.823651	0.123254	6.68252	2.34862e-11	1.15615e-09	878.881	494.242	855.321	506.039	999.054	500.853	782.268	475.834
Rims1	4856.05	0.823234	0.155536	5.29287	1.2041e-07	3.8552e-06	313.099	176.833	324.212	167.447	291.44	184.784	323.643	178.268
Wrnip1	1783.74	0.822828	0.229525	3.58491	0.000337197	0.00514891	115.26	64.7022	137.299	62.1658	106.258	71.4395	102.224	60.5014
Alk	607.426	0.821611	0.387786	2.11872	0.0341139	0.166739	40.1398	21.1439	40.828	19.604	21.7418	20.7785	57.8497	23.0493
Ctu1	198.575	0.82134	0.610581	1.34518	0.178567	0.4301	12.9885	7.04595	11.5421	7.60649	8.98577	7.25641	18.4375	6.27495
Zbtb34	596.122	0.821129	0.4111	1.9974	0.0457822	0.199297	39.8374	20.3058	65.4626	20.2609	32.1728	18.7435	21.8769	21.9129
A230046K03Rik	1246.41	0.820906	0.322569	2.5449	0.010931	0.0779829	82.8871	42.8646	134.026	39.4846	54.4173	45.9751	60.2179	43.1341
Vps39	2305.84	0.819872	0.200378	4.09163	4.28349e-05	0.000833629	148.909	83.7288	177.783	89.1343	133.341	85.1223	135.603	76.9299
Fkbp15	1295.79	0.819864	0.249499	3.28605	0.00101604	0.0129421	83.4489	47.2842	77.6938	49.2693	87.3442	47.7691	85.3086	44.814
Msx2	53.0457	0.819744	1.12156	0.730896	0.464842	0.698413	3.62697	1.72486	2.41178	1.83247	1.75945	1.68691	6.70967	1.6552
Psmg2	212.799	0.818998	0.59996	1.36509	0.172225	0.423048	14.1199	7.34963	21.017	7.67564	14.0128	6.96187	7.32989	7.41136
Rbm22	688.893	0.818946	0.339446	2.41259	0.0158395	0.100648	44.4832	25.0199	44.1011	24.3754	37.137	27.0174	52.2114	23.6669
Dis3l2	686.261	0.818847	0.370618	2.20941	0.0271464	0.144962	45.1103	24.1271	66.324	22.1626	39.462	26.4283	29.5451	23.7905
Ccnd2	787.094	0.818768	0.36778	2.22624	0.025998	0.140851	52.5437	26.8669	86.3073	26.4844	30.7275	27.312	40.5963	26.8044
Glt8d2	27.7551	0.818622	1.49753	0.546649	0.58462	0.783352	1.97026	0.829984	0.861351	0.795224	4.14728	0.830069	0.90214	0.864659
Cep290	954.346	0.817546	0.305622	2.67502	0.00747247	0.0597156	61.9211	34.3637	63.5677	32.5696	76.976	34.3542	45.2198	36.1674
Tuba4a	5537.56	0.815737	0.186682	4.36966	1.24439e-05	0.000274059	360.51	198.18	499.411	198.979	281.198	214.452	300.92	181.109
Chaf1a	201.799	0.815629	0.713633	1.14292	0.25307	0.516548	14.2547	6.10503	17.9161	5.3937	2.57634	6.07825	22.2716	6.84316
Sybu	3256.43	0.815335	0.199905	4.07862	4.53043e-05	0.000878242	211.405	117.139	280.628	116.206	189.455	127.697	164.133	107.514
Tfdp2	732.022	0.815257	0.378221	2.1555	0.0311225	0.157431	48.9797	24.8747	82.1728	27.7983	25.0722	25.6786	39.6942	21.1471
Rpgrip1l	1033.46	0.81517	0.320217	2.54568	0.0109065	0.0779517	68.0355	36.2316	103.707	34.817	49.7673	35.5859	50.6326	38.292
Sema4c	223.468	0.815101	0.552476	1.47536	0.140116	0.37736	14.3824	8.16345	15.5043	8.57459	13.3216	8.0597	14.3215	7.85604
Crmp1	8948.64	0.815036	0.151698	5.37277	7.75359e-08	2.55388e-06	576.797	326.04	689.08	308.132	532.108	368.765	509.202	301.222
Dcaf12l1	1570.35	0.814214	0.228808	3.55851	0.000372965	0.00559185	101.219	57.2151	117.488	62.1658	100.352	57.007	85.8161	52.4724
Helz	1958.72	0.81417	0.21445	3.79654	0.000146728	0.00251798	126.044	71.5732	122.829	77.2751	140.505	68.4941	114.797	68.9503
Kcnh5	352.964	0.813802	0.461652	1.7628	0.0779337	0.271093	22.9349	12.676	24.9792	11.6518	15.5209	12.6653	28.3046	13.711
Bre	407.292	0.813635	0.438921	1.85372	0.0637795	0.243287	26.7467	14.3453	39.2776	15.3167	23.8783	14.0576	17.0843	13.6616
Dram2	163.557	0.813511	0.725852	1.12077	0.262387	0.52508	11.142	5.35939	16.8825	4.80592	3.5189	5.83726	13.0246	5.435
Tdrd1	47.2582	0.813465	1.21432	0.669893	0.502926	0.72686	3.26174	1.50618	0.68908	1.41757	4.0216	1.12461	5.07454	1.97636
Zfp82	192.062	0.813338	0.69079	1.1774	0.239035	0.500669	13.7597	5.61767	28.4246	5.56657	3.83309	5.38206	9.0214	5.90438
Rax	50.8619	0.813138	1.47724	0.550444	0.582015	0.78169	4.15827	0.973229	9.64713	1.17555	2.82769	0.830069	0	0.914068
Fstl5	774.52	0.812705	0.337134	2.41062	0.0159252	0.101063	50.0868	28.0552	61.1559	23.4764	53.9774	34.3542	35.1271	26.335
Sars	4722.52	0.812188	0.189811	4.27894	1.87789e-05	0.000397695	305.269	171.19	363.318	161.88	230.425	186.739	322.064	164.952
Irs1	2741.68	0.812094	0.203675	3.9872	6.68572e-05	0.00125519	177.345	99.2662	213.615	98.919	135.792	100.037	182.627	98.8428
Gpaa1	266.455	0.811932	0.570095	1.4242	0.154387	0.398287	18.0225	8.86037	32.0422	8.19427	11.8763	9.34497	10.1491	9.04186
Sirt6	208.669	0.811885	0.623511	1.30212	0.192876	0.44781	13.9022	7.15063	6.02945	7.46819	14.1384	6.07825	21.5386	7.90545
Chd8	3916.73	0.811389	0.166928	4.86072	1.16958e-06	3.195e-05	252.528	142.635	302.334	150.816	227.346	137.631	227.903	139.457
Cand1	4830	0.811063	0.178757	4.53724	5.69949e-06	0.000135766	314.157	173.146	419.478	183.075	303.38	175.734	219.615	160.629
Eftud1	648.351	0.811047	0.356758	2.27339	0.023003	0.130018	42.2243	23.1884	26.3573	21.0907	46.7511	25.2769	53.5646	23.1976
Sdha	7158.41	0.811022	0.13652	5.94069	2.8383e-09	1.09757e-07	459.844	262.375	481.15	273.696	445.958	271.62	452.423	241.808
2610101N10Rik	2559.86	0.810927	0.208328	3.89255	9.9196e-05	0.00177717	166.135	92.1314	222.918	96.3605	132.273	86.6753	143.215	93.3584
Otog	36.2189	0.810859	1.52197	0.532768	0.594194	0.789706	2.90763	0.746528	6.71853	0.726075	1.94796	0.722964	0.0563838	0.790545
Rtkn	528.392	0.810677	0.407249	1.99062	0.0465229	0.201288	34.675	18.635	42.3784	21.0216	18.8513	17.8867	42.7953	16.9967
Cobl	2523.22	0.810584	0.222674	3.64023	0.000272396	0.0042824	163.585	90.985	113.526	93.6982	202.777	93.5568	174.451	85.7
Slc37a1	94.449	0.810214	0.914829	0.885646	0.375808	0.62751	6.51976	3.00929	2.41178	3.76867	12.6932	2.51698	4.45432	2.7422
Caskin1	7013.67	0.810102	0.157363	5.148	2.63282e-07	7.82383e-06	451.782	255.833	431.192	264.983	391.666	263.748	532.488	238.769
Tkt	2613.3	0.810021	0.210509	3.84792	0.000119127	0.00209394	169.652	94.0057	227.052	95.9456	153.575	98.6176	128.329	87.454
Vipar	1080.27	0.809867	0.378275	2.14095	0.0322782	0.161153	75.3319	33.6578	150.392	34.1947	39.462	34.1935	36.142	32.5853
Has3	110.608	0.809508	0.994225	0.81421	0.415525	0.660087	8.10138	3.05801	14.1261	2.766	9.61414	2.67764	0.563838	3.73038
Mtmr12	448.563	0.808743	0.452126	1.78876	0.0736538	0.26376	29.6806	15.5753	47.7188	14.1066	20.7992	14.8074	20.5237	17.812
Fam65b	1379	0.808464	0.239999	3.36862	0.000755468	0.010098	88.6066	50.5218	96.6435	53.7295	87.5327	49.8845	81.6437	47.9515
Cdc5l	2151.55	0.808379	0.254455	3.1769	0.00148858	0.0174504	140.04	77.0317	198.283	71.1207	103.996	88.2819	117.842	71.6926
Dpysl4	2204.06	0.808238	0.215404	3.75219	0.000175298	0.0028966	142.472	79.8975	183.64	81.8044	128.754	86.5414	115.023	71.3467
Ap3b1	1227.84	0.80789	0.308477	2.61897	0.00881969	0.0673027	80.4931	43.3845	48.2356	45.2586	115.998	41.316	77.2458	43.5788
Psmd2	6605.59	0.807786	0.149488	5.4037	6.5279e-08	2.16936e-06	423.88	242.564	403.457	242.198	412.151	265.97	456.032	219.524
Xpnpep3	181.369	0.807553	0.619659	1.30322	0.192499	0.447312	11.5813	6.71718	10.853	8.26342	11.3736	6.45312	12.5172	5.435
9930013L23Rik	687.306	0.807149	0.383441	2.10502	0.03529	0.170473	45.2282	24.1147	63.7399	22.6466	24.6951	25.4376	47.2496	24.2599
Hspa8	56120.3	0.80714	0.117274	6.88252	5.88035e-12	3.09352e-10	3606.17	2055.85	4126.56	1971.43	3408.56	2273.37	3283.4	1922.75
Rangap1	6257.55	0.805708	0.161345	4.99369	5.92366e-07	1.68304e-05	404.225	227.105	511.987	228.402	375.014	238.23	325.673	214.682
Arid4b	3060.25	0.805162	0.205823	3.91191	9.15699e-05	0.00165851	197.403	111.348	242.901	103.206	158.225	119.396	191.085	111.442
Rspo4	55.2189	0.805057	1.45995	0.551428	0.58134	0.781131	4.69936	0.87172	12.5757	1.00267	0	1.04428	1.52236	0.568204
Axin1	955.973	0.804785	0.321358	2.50433	0.0122684	0.0843272	62.1235	34.3255	81.8283	31.7744	41.7869	36.764	62.7551	34.4381
Synj2	477.182	0.804765	0.40314	1.99624	0.0459078	0.199524	30.878	17.2653	32.0422	16.8034	22.3073	17.6992	38.2846	17.2932
Leprel2	170.348	0.804281	0.649341	1.23861	0.215489	0.475305	11.3065	5.88013	16.5379	6.46552	5.08984	4.57877	12.2917	6.59611
Matn2	176.876	0.803014	0.634944	1.2647	0.205979	0.462671	11.5087	6.33644	15.6766	6.05062	7.85469	6.56022	10.9948	6.39847
Magee2	399.356	0.802935	0.474605	1.6918	0.0906845	0.295818	27.0442	13.2472	48.9247	14.7635	18.7884	12.1565	13.4193	12.8217
Impdh2	1689.31	0.802767	0.255037	3.14765	0.00164589	0.0188664	108.973	61.4622	121.795	62.8919	79.6151	66.7001	125.51	54.7947
Fgfrl1	102.956	0.802671	0.811044	0.989676	0.322332	0.582704	6.60543	3.78193	6.8908	5.15167	4.5243	3.10607	8.40118	3.08807
Larp1	6691.79	0.802664	0.143657	5.58737	2.30528e-08	8.09458e-07	429.498	245.643	473.743	238.325	422.771	262.034	391.98	236.571
Nav3	3469.42	0.802448	0.208845	3.84231	0.000121883	0.00213733	225.232	124.8	154.699	123.778	220.811	128.928	300.187	121.695
Fcho1	1368.82	0.802432	0.242049	3.31516	0.000915894	0.0118367	87.8855	50.2156	100.089	53.7641	80.6834	49.697	82.8841	47.1857
Ddx24	6708.71	0.80177	0.140193	5.71904	1.07127e-08	3.86175e-07	430.694	246.154	458.755	242.129	464.181	266.854	369.144	229.48
Dock7	1384.7	0.80093	0.249922	3.20471	0.00135197	0.0162454	89.0727	50.631	106.463	50.3066	82.9455	48.867	77.8096	52.7195
Zfp281	938.169	0.800653	0.284742	2.81185	0.00492574	0.0440447	60.0956	34.5571	60.4668	36.5112	59.8842	34.97	59.9359	32.19
Klf2	153.134	0.800287	0.714362	1.12028	0.262594	0.525248	10.4989	4.95091	18.6052	5.1171	3.64458	4.17712	9.24694	5.55852
Zmat1	756.64	0.800159	0.326229	2.45275	0.0141769	0.0933678	49.012	27.326	66.324	29.1467	38.1424	26.6693	42.5697	26.1621
Hsdl2	718.779	0.799913	0.354703	2.25516	0.0241231	0.13361	46.8584	25.6599	42.0339	26.2424	31.6701	25.7857	66.8711	24.9516
Cyp2j9	168.573	0.799892	0.711041	1.12496	0.260606	0.524312	11.6275	5.37992	22.0506	4.63305	4.71281	5.35529	8.11926	6.15143
G3bp1	2174.16	0.799714	0.21612	3.70033	0.000215324	0.0034845	140.272	79.0812	171.926	80.9054	141.761	78.9637	107.129	77.3746
Slc2a1	257.481	0.798985	0.596593	1.33925	0.18049	0.432781	17.4395	8.538	17.0547	8.60917	28.7796	8.08648	6.48413	8.91834
Ky	211.8	0.79884	0.601818	1.32738	0.184384	0.437137	14.0381	7.33056	9.64713	7.64107	9.23712	6.98865	23.2301	7.36195
Rab11fip5	3485.9	0.798734	0.171508	4.65713	3.20653e-06	8.0504e-05	223.448	128.248	244.107	126.13	218.8	136.747	207.436	121.867
Utp3	1528.36	0.79754	0.257405	3.09839	0.00194575	0.0213946	98.06	56.1379	119.039	49.8571	85.7732	65.7629	89.3683	52.7936
Fen1	223.33	0.797515	0.563796	1.41455	0.157202	0.402149	14.3882	8.14377	18.7774	8.22884	11.8135	9.21109	12.5736	6.99138
Ubap2l	4692.87	0.797291	0.168924	4.71982	2.36057e-06	6.04891e-05	301.001	172.468	338.855	174.742	257.194	184.972	306.953	157.689
Rtf1	3774.2	0.797154	0.177412	4.49323	7.01509e-06	0.000161673	242.02	138.762	279.25	130.728	235.766	156.107	211.044	129.452
Arhgap12	1985.28	0.795756	0.239451	3.32326	0.000889718	0.0116092	127.419	72.8777	129.375	71.1207	102.111	82.7124	150.77	64.8
Hic1	148.601	0.795727	1.12597	0.706701	0.479752	0.709431	11.696	3.29654	19.6388	3.35377	0	3.05251	15.4492	3.48334
Ccdc108	86.4452	0.795061	0.999001	0.795856	0.426116	0.668635	6.38866	2.33288	0.68908	2.17822	4.77565	1.95468	13.7013	2.86573
Thoc2	1746.12	0.794172	0.269993	2.94146	0.00326672	0.0318918	113.677	62.4906	155.732	60.852	113.862	60.4612	71.4382	66.1587
Mag	781.526	0.794088	0.373413	2.12657	0.0334561	0.164714	51.2737	27.5751	78.7274	23.3035	32.2985	27.5529	42.7953	31.8688
Nalcn	2322.26	0.79397	0.222527	3.56797	0.000359758	0.00543212	149.867	84.4272	189.669	83.1874	111.474	86.5682	148.458	83.526
Ercc6	799.339	0.793496	0.343085	2.31282	0.0207323	0.121473	52.0999	28.5461	71.8366	28.3861	52.1551	28.2491	32.3079	29.0031
Tnrc6c	3268.26	0.793352	0.181847	4.36273	1.28447e-05	0.000282469	209.693	120.045	177.955	117.52	205.29	123.118	245.833	119.496
Prtg	90.3022	0.792958	0.951358	0.833501	0.404562	0.650094	5.89721	3.21347	1.89497	4.66762	7.22631	2.00823	8.57033	2.96454
Paf1	1920.17	0.792069	0.215381	3.67753	0.000235505	0.00375288	122.977	70.7505	104.051	67.4904	130.011	76.8483	134.87	67.9128
Tanc2	8165.74	0.792025	0.131444	6.02557	1.68519e-09	6.76255e-08	522.219	301.63	525.768	309.481	535.69	290.605	505.198	304.805
9830132P13	76.8819	0.792013	1.08311	0.731239	0.464633	0.698225	6.33374	1.42294	16.7102	1.31385	1.44526	1.4727	0.845756	1.48227
H19	442.519	0.791813	0.47244	1.67601	0.0937365	0.301219	29.1601	15.4861	30.4918	20.4684	13.5729	14.0576	43.4155	11.9323
Fam38a	37.1662	0.791384	1.31641	0.601168	0.547728	0.758918	2.43946	1.31027	1.03362	1.6596	2.45066	0.937175	3.8341	1.33404
Htra1	393.905	0.791352	0.439353	1.80117	0.0716754	0.259573	25.5761	14.1653	21.1892	11.4443	37.891	16.8959	17.6481	14.1557
Pyroxd1	182.845	0.790499	0.684487	1.15488	0.24814	0.511253	12.8463	5.60107	26.3573	5.77402	7.16348	5.5695	5.01815	5.4597
Jrk	400.18	0.790037	0.459313	1.72004	0.0854251	0.285635	26.2434	14.1311	37.3826	13.83	14.4526	14.1112	26.8951	14.4522
Zfp689	492.701	0.789807	0.397219	1.98834	0.046774	0.201964	31.8685	17.8405	41.5171	17.9098	22.1188	17.0834	31.9696	18.5284
0610030E20Rik	369.553	0.789381	0.447696	1.76321	0.0778651	0.270937	23.9201	13.3644	18.4329	13.4497	19.1026	11.6477	34.2249	14.9957
D630037F22Rik	654.813	0.788981	0.342446	2.30396	0.0212251	0.123293	42.0232	24.0415	48.5802	22.8195	33.1154	22.9206	44.374	26.3844
4933407H18Rik	486.318	0.788526	0.403855	1.9525	0.0508794	0.212302	31.319	17.746	21.3615	17.979	34.8748	15.7178	37.7207	19.5413
Psg28	102.759	0.788039	0.826983	0.952908	0.340637	0.598375	6.88038	3.48703	12.0589	3.5958	3.95876	3.15962	4.62347	3.70568
Gapvd1	3363.73	0.78786	0.187847	4.19416	2.73884e-05	0.000556286	215.809	123.561	223.434	129.38	251.853	118.298	172.14	123.004
Nars	3565.18	0.787231	0.165833	4.74714	2.06314e-06	5.36994e-05	227.68	132.015	220.506	128.826	253.801	147.993	208.733	119.224
Msx1	42.6057	0.786839	1.33942	0.587447	0.556904	0.765293	3.3873	0.911225	8.26897	0.726075	0.314188	0.722964	1.57875	1.28464
Zfp781	33.3694	0.786659	1.62503	0.48409	0.628322	0.80956	2.57282	0.793846	0	0.898949	2.13648	0.642634	5.58199	0.839954
Mtor	4221.75	0.786379	0.187111	4.20274	2.63703e-05	0.000538548	272.082	153.854	264.607	151.784	350.068	155.571	201.572	154.206
Mre11a	245.388	0.786137	0.528982	1.48613	0.137244	0.373067	15.6797	9.07778	16.8825	9.54269	15.8351	8.64879	14.3215	9.04186
Afap1	1848.14	0.785932	0.220312	3.56736	0.000360595	0.00543925	118.234	68.2257	134.371	66.0728	107.452	70.3952	112.88	68.2092
Zer1	4241.45	0.785506	0.17619	4.45828	8.26191e-06	0.000188079	273.897	154.026	373.654	173.774	249.905	148.181	198.133	140.124
Rae1	840.033	0.785404	0.320271	2.45231	0.0141942	0.0933678	54.1191	30.6326	59.2609	29.9419	38.1424	31.2481	64.9541	30.7077
Serpina1a	40.6407	0.784644	1.35737	0.578063	0.563222	0.770066	3.016	1.08428	6.8908	0.5532	0.691213	1.3656	1.46598	1.33404
D330045A20Rik	57.978	0.784619	1.10583	0.709528	0.477997	0.70782	3.86975	1.9797	4.65129	1.97077	1.31959	2.43665	5.63838	1.53168
Setmar	83.8072	0.784448	0.90225	0.869435	0.384609	0.635382	5.42575	3.02963	3.78994	3.35377	4.64998	3.23995	7.83734	2.49516
Mcm6	259.231	0.783795	0.514835	1.52242	0.127904	0.358972	16.5435	9.6106	15.5043	9.02407	17.1546	10.1483	16.9715	9.65947
Ampd2	1291.15	0.783674	0.248311	3.15601	0.00159942	0.0184585	82.3806	47.8848	80.1056	50.03	82.0658	46.5374	84.9703	47.0868
Tubb2b	5297.39	0.78339	0.167772	4.66937	3.0213e-06	7.59815e-05	340.703	193.756	287.347	164.681	275.291	199.779	459.471	216.807
Tpr	4973.23	0.78301	0.150651	5.1975	2.01983e-07	6.13699e-06	317.795	183.959	288.725	174.777	367.348	199.351	297.312	177.749
Btbd11	1908.97	0.782961	0.25028	3.12834	0.00175796	0.0197678	123.744	68.8538	171.064	67.5595	116.438	70.422	83.7299	68.5798
D6Wsu163e	613.813	0.782415	0.347127	2.25397	0.024198	0.133975	39.1915	22.7366	36.0045	20.8833	44.3005	22.8938	37.2697	24.4328
Zfhx3	9540.99	0.781329	0.138044	5.65998	1.51392e-08	5.40509e-07	609.286	353.312	533.348	361.239	669.722	335.294	624.788	363.404
Rsph3b	62.282	0.781193	1.11246	0.702222	0.48254	0.711857	4.69814	1.58555	10.853	1.48672	0.816888	1.39237	2.4245	1.87754
S100pbp	838.99	0.780783	0.300683	2.59669	0.00941257	0.0703839	53.5838	31.0626	59.95	31.6361	52.0295	30.177	48.772	31.3748
Bnip2	507.825	0.780516	0.40882	1.90919	0.0562372	0.226225	33.169	18.066	43.5843	20.3301	17.4688	16.5746	38.4537	17.2932
Sh3bp4	1059.91	0.780385	0.318199	2.45251	0.0141864	0.0933678	68.8665	38.0689	40.6557	37.0644	70.8807	42.3335	95.063	34.8087
Naip6	27.4899	0.780259	2.40925	0.323859	0.746045	0.879145	2.75632	0.0171603	8.26897	0	0	0.0267764	0	0.0247045
Aim2	87.3467	0.780095	0.863877	0.903017	0.366517	0.618903	5.62027	3.19222	5.68491	3.1809	3.95876	2.8383	7.21712	3.55745
Dpysl2	26855.6	0.779763	0.109341	7.13151	9.92766e-13	5.51504e-11	1714.68	994.811	1939.07	1032.79	1665.51	1011.91	1539.45	939.736
Zfp212	414.836	0.779415	0.417221	1.86811	0.0617466	0.237787	26.4898	15.3633	24.2901	14.6598	24.5066	16.3604	30.6728	15.0698
Stxbp5l	3979.85	0.778639	0.178701	4.35723	1.31719e-05	0.000287121	254.583	146.947	250.136	155.415	302.625	140.041	210.988	145.386
Plekhg3	328.766	0.778596	0.555791	1.40088	0.16125	0.408281	22.5276	10.6418	43.9289	9.54269	11.8135	9.26464	11.8406	13.1181
Mipep	579.707	0.778587	0.376557	2.06765	0.0386733	0.180378	37.375	21.1123	41.3448	22.3354	24.8837	20.9659	45.8964	20.0354
F13a1	119	0.778262	0.747727	1.04084	0.297951	0.559991	7.66638	4.33962	6.54626	4.11442	10.8709	5.24818	5.58199	3.65627
Zmym3	2950.68	0.778225	0.179402	4.33787	1.43868e-05	0.000311776	188.276	109.42	189.669	113.925	210.631	113.666	164.528	100.671
Srp54a	234.366	0.777729	0.622824	1.24871	0.211769	0.470177	16.3089	7.33652	32.3868	7.53734	10.6195	7.28319	5.92029	7.18902
Igsf3	816.554	0.777478	0.331733	2.34369	0.019094	0.11495	52.3622	30.0206	56.8491	26.1733	62.4605	30.6858	37.7771	33.2029
Phgdh	496.522	0.777245	0.43439	1.78928	0.0735694	0.26376	32.7941	17.3004	17.0547	17.5641	28.214	16.5746	53.1135	17.7626
Cecr6	287.739	0.776419	0.552019	1.40651	0.159574	0.405692	19.0786	9.95164	29.1136	10.8911	8.10604	10.416	20.0162	8.54777
Cpsf7	1624.86	0.776374	0.240456	3.22876	0.00124329	0.0151722	104.483	59.451	138.677	62.6844	91.4914	58.1316	83.2788	57.5369
Per1	1442.05	0.776008	0.248867	3.11816	0.00181981	0.0203251	92.531	52.9585	114.215	53.5566	94.759	56.8731	68.619	48.4456
Wdr36	629.377	0.774615	0.357795	2.16497	0.0303899	0.15543	40.2562	23.2422	49.9583	22.4046	32.864	26.0267	37.9463	21.2953
Eno2	13741.7	0.774128	0.135316	5.72087	1.05978e-08	3.8296e-07	880.755	505.659	1161.45	578.266	698.439	498.845	782.381	439.864
Unc5a	838.595	0.773514	0.30225	2.55919	0.0104916	0.0758251	53.5206	31.086	52.1978	31.1175	46.0599	30.1235	62.3041	32.0171
Rassf1	221.829	0.772632	0.69541	1.11105	0.266549	0.529824	16.4782	5.90236	37.7272	5.77402	3.64458	5.75693	8.06288	6.17613
Stxbp2	124.867	0.772081	0.741074	1.04184	0.297486	0.559561	7.99723	4.60072	8.61351	5.32455	9.73982	3.88258	5.63838	4.59504
Ikzf4	460.288	0.77199	0.393031	1.96419	0.0495076	0.208624	29.2781	17.1608	34.454	20.0881	26.2032	14.6199	27.177	16.7744
Tars	868.798	0.771649	0.295443	2.61183	0.00900582	0.0683029	55.4415	32.2123	54.6096	32.6388	66.6078	35.6126	45.107	28.3855
Gpr37l1	376.993	0.770194	0.499039	1.54335	0.122745	0.351486	25.0474	12.9878	40.1389	11.2023	10.8709	11.4068	24.1322	16.3544
Ncapg2	143.314	0.77001	0.761841	1.01072	0.312149	0.5741	9.59621	4.8629	13.0925	6.3618	2.95336	4.79298	12.7427	3.43393
Zswim1	671.654	0.769863	0.351541	2.18997	0.0285267	0.149726	43.4178	24.346	62.3618	25.4472	35.189	24.3933	32.7026	23.1976
Pogz	2247.24	0.769366	0.198146	3.88281	0.000103254	0.00184102	142.825	83.9008	146.085	90.863	146.788	80.6238	135.603	80.2156
Nin	1427.92	0.768915	0.245089	3.13729	0.00170516	0.0193938	91.2012	52.8629	98.5385	51.1364	70.755	49.9648	104.31	57.4874
Zdhhc7	715.324	0.768538	0.386829	1.98677	0.0469481	0.202376	47.5227	24.647	75.282	26.035	46.3113	24.6343	20.9748	23.2717
Tuba1a	12017.6	0.768463	0.153964	4.99118	6.00107e-07	1.70179e-05	768.586	443.882	953.515	420.674	612.037	461.251	740.206	449.721
Hspd1	4520.1	0.76808	0.166079	4.6248	3.74961e-06	9.30403e-05	287.595	168.443	312.153	172.08	251.853	177.956	298.778	155.293
Snx14	531.029	0.767761	0.381905	2.01035	0.0443945	0.195937	33.9579	19.6181	25.1514	19.604	40.4674	18.7703	36.2548	20.4801
Anapc2	2780.4	0.767437	0.184687	4.15535	3.24796e-05	0.000648199	176.702	103.815	170.375	99.4722	171.861	110.56	187.871	101.412
Rapgef3	525.739	0.76616	0.541673	1.41443	0.157235	0.402149	35.8683	17.174	8.09669	20.5721	55.3599	14.9412	44.1485	16.0085
Zfp935	252.102	0.766025	0.548987	1.39534	0.162913	0.410432	16.4793	8.95543	25.496	9.05864	9.67698	7.92582	14.2651	9.88181
Rnf40	1509.11	0.765821	0.264789	2.8922	0.00382559	0.0358622	97.4976	54.758	59.2609	50.9981	130.388	57.5425	102.844	55.7334
Pdzrn4	440.976	0.765019	0.432012	1.77083	0.076589	0.268549	28.4733	16.0171	37.3826	14.2795	30.7275	18.5293	17.3098	15.2427
Snrnp40	479.632	0.764858	0.440781	1.73524	0.0826992	0.280824	31.8935	16.497	55.2987	17.0109	18.2229	16.5211	22.1588	15.9591
Dot1l	1473.67	0.764343	0.266055	2.87288	0.00406752	0.0377068	94.6299	54.05	124.207	51.897	68.1159	55.8289	91.5672	54.4241
Bcan	1145.67	0.764083	0.279302	2.73569	0.00622497	0.0523897	73.4284	42.1594	50.8197	38.9314	91.9941	41.7445	77.4713	45.8022
Tcf20	11812.9	0.763857	0.120322	6.34842	2.17538e-10	9.69671e-09	750.152	441.662	745.068	456.943	794.895	448.907	710.492	419.137
Cacna1e	4441.1	0.76357	0.168639	4.52785	5.95877e-06	0.000140816	281.775	166.291	281.489	161.88	301.934	151.314	261.903	185.679
Smc2	301.363	0.763492	0.483425	1.57934	0.114258	0.33693	19.244	11.1607	13.7816	9.61184	21.6789	11.5674	22.2716	12.3029
Ddr2	66.6676	0.763375	0.987966	0.772673	0.439716	0.678533	4.29948	2.42668	2.23951	1.90162	4.96416	2.14211	5.69476	3.23629
Trim66	2739.66	0.763313	0.195886	3.89673	9.75017e-05	0.00175103	175.217	101.191	202.762	108.081	196.87	103.812	126.018	91.6785
5430411K18Rik	1778.09	0.762825	0.247217	3.08564	0.00203111	0.0221208	113.742	65.6513	80.1056	68.3547	131.268	66.2449	129.852	62.3542
Serpinh1	140.893	0.762562	0.714129	1.06782	0.285601	0.548511	9.19567	5.01917	4.82356	4.73677	13.5729	5.03397	9.19055	5.28677
Smarca1	2509.6	0.762054	0.197884	3.85101	0.000117634	0.00207504	159.637	93.559	184.501	91.0705	151.25	98.6444	143.158	90.9621
Zfp36	73.1389	0.761693	1.03138	0.738516	0.460201	0.694876	5.20538	2.17367	8.09669	2.52397	6.78645	2.16889	0.732989	1.82814
Ism1	154.62	0.761606	0.945686	0.805348	0.420619	0.663436	11.6243	3.97548	21.1892	4.18357	0.377025	4.28423	13.3066	3.45863
Rbbp6	3245.18	0.761024	0.214073	3.55498	0.000378013	0.00565852	208.965	118.444	207.241	111.539	282.078	124.323	137.576	119.471
Ctla2a	181.054	0.76052	0.641418	1.18569	0.235746	0.497942	11.8013	6.4654	15.6766	5.87775	5.96956	6.1318	13.7576	7.38665
Usp4	2391.92	0.759813	0.195073	3.89502	9.81902e-05	0.00176127	151.784	89.5389	137.299	88.0625	158.036	94.3601	160.017	86.1941
Ahi1	29192.4	0.759446	0.104047	7.29907	2.89761e-13	1.68514e-11	1851.19	1094.06	1888.77	1102.56	1931	1164.02	1733.8	1015.6
Syn1	15103.3	0.759086	0.116584	6.51105	7.46279e-11	3.48295e-09	958.704	565.077	1109.25	619.272	909.887	575.051	856.977	500.909
Cobll1	228.575	0.758936	0.551689	1.37566	0.168927	0.419166	14.4941	8.56701	15.6766	7.60649	13.2587	9.39853	14.547	8.696
LOC100504703	42.3327	0.758726	1.49882	0.506217	0.612704	0.799819	3.1464	1.12458	0	1.2447	3.5189	0.696187	5.92029	1.43286
Rif1	1574.72	0.758599	0.271577	2.79331	0.00521719	0.0460697	101.146	57.729	109.908	56.3918	127.56	55.454	65.969	61.3414
Cyth4	137.248	0.758495	0.700597	1.08264	0.278967	0.541213	8.81341	5.03363	10.3362	5.18625	5.27835	3.93613	10.8257	5.9785
Dync1i1	2422.11	0.758359	0.191718	3.95559	7.63473e-05	0.00140502	153.709	90.66	164.346	92.3498	165.577	99.0192	131.205	80.6109
Rap1gap	5529.89	0.758007	0.144988	5.22807	1.71289e-07	5.26892e-06	350.622	207.294	370.725	210.734	349.942	216.648	331.198	194.499
Atad2	114.533	0.75797	0.932256	0.813049	0.41619	0.660291	8.64527	2.91009	0.68908	2.3511	18.5371	2.62409	6.70967	3.75509
Mtap7	1357.6	0.757466	0.243145	3.11529	0.00183767	0.0204748	86.1788	50.7906	88.7191	51.2055	75.6564	48.5457	94.1609	52.6207
Upf1	1860.58	0.756958	0.229009	3.30537	0.000948517	0.0121948	119.348	68.3674	87.1687	63.4451	166.959	78.2407	103.915	63.4165
Ivd	764.859	0.756885	0.346517	2.18426	0.0289429	0.151051	50.1805	26.9868	82.6897	30.91	38.6451	27.1245	29.2068	22.9258
Cts8-ps	29.7075	0.75672	1.54208	0.490715	0.623628	0.806372	2.20239	0.794829	0.17227	0.656925	4.46146	0.615858	1.97343	1.1117
Chml	800.713	0.756673	0.309946	2.44131	0.0146341	0.0955161	50.903	29.8817	52.7147	31.2212	41.9755	28.7043	58.0189	29.7196
Enpp2	600.274	0.756657	0.365165	2.07209	0.0382568	0.179053	38.5545	22.0076	24.6346	20.1226	50.2072	23.6168	40.8218	22.2835
Prex2	507.319	0.756607	0.421932	1.7932	0.0729415	0.262118	32.5349	18.649	23.7733	20.3301	45.8086	15.2358	28.0227	20.3812
Ppp2r1a	9903.36	0.756512	0.177565	4.26047	2.03993e-05	0.000426552	641.177	357.981	974.704	385.753	461.165	374.468	487.663	313.723
D2Wsu81e	565.389	0.756443	0.36857	2.05238	0.0401331	0.184699	36.0852	20.9574	33.5927	20.4338	28.6539	21.0195	46.0091	21.4188
Lrp1b	2234.01	0.756442	0.253902	2.97926	0.00288942	0.0289877	144.434	80.9576	95.2654	81.9427	211.511	76.6877	126.525	84.2425
Mybl1	112.93	0.756358	0.807935	0.936162	0.34919	0.606036	7.56317	3.83045	13.6093	3.56122	4.96416	4.15035	4.11601	3.77979
Sec24a	1091.59	0.75619	0.317514	2.3816	0.0172376	0.106933	71.6668	38.4642	117.488	40.591	54.0403	38.5848	43.4719	36.2168
Taco1	260.58	0.755917	0.523219	1.44474	0.14853	0.389865	16.7928	9.49735	24.6346	10.822	12.9445	8.70234	12.7991	8.96775
Col6a3	230.728	0.755389	0.617372	1.22356	0.22112	0.481257	15.3561	7.92225	8.09669	8.09054	27.1458	6.56022	10.8257	9.11597
Rpap3	910.702	0.75523	0.290527	2.59951	0.00933562	0.0699842	57.6159	34.2656	54.9542	35.059	60.8896	37.6477	57.004	30.0901
Mcf2	261.121	0.755147	0.629083	1.20039	0.229986	0.49203	18.2984	8.04643	30.1473	9.33524	21.3648	8.0597	3.38303	6.74434
Adnp	4926.13	0.755069	0.149854	5.03869	4.68737e-07	1.34982e-05	312.234	184.767	315.082	184.665	332.033	190.702	289.587	178.935
Pkn1	996.94	0.754545	0.294416	2.56285	0.0103816	0.0753222	63.528	37.0542	52.0256	38.6202	57.8734	36.523	80.6852	36.0192
Aff3	2817.28	0.754411	0.239173	3.15425	0.00160909	0.0185419	183.889	100.349	290.792	105.108	114.616	96.8236	146.259	99.1146
Itih5	214.13	0.754169	0.585952	1.28708	0.198065	0.45373	13.6779	7.92592	11.7144	7.0533	18.6627	7.33674	10.6565	9.38772
Cpsf1	987.682	0.754003	0.299556	2.51707	0.0118336	0.0825581	63.0213	36.6269	45.307	37.5484	76.0962	36.3624	67.6605	35.9698
Gtf2i	6604.94	0.753962	0.139949	5.38741	7.14791e-08	2.36485e-06	418.724	247.654	459.789	250.599	400.401	246.798	395.983	245.563
Zfp324	592.21	0.753878	0.43176	1.74606	0.0808008	0.277437	39.9094	19.8393	24.9792	20.2609	20.5479	19.4932	74.201	19.7636
Mcam	89.0486	0.753734	1.01153	0.745143	0.456185	0.691672	5.93354	3.05065	8.44124	2.52397	8.23171	2.00823	1.12768	4.61975
Tchp	475.11	0.753618	0.413622	1.822	0.0684556	0.253272	30.6159	17.3184	19.122	16.0428	42.7295	17.1369	29.9962	18.7754
Nmd3	474.17	0.753251	0.432862	1.74016	0.0818301	0.279515	30.5693	17.2701	17.0547	18.3247	37.891	18.0205	36.7622	15.465
Trib3	30.5556	0.753093	1.68126	0.447934	0.654201	0.824142	2.54996	0.532824	0	0.449475	6.40943	0.481976	1.24044	0.667022
Plcd3	225.161	0.752665	0.577593	1.30311	0.192539	0.447334	14.2792	8.43756	15.5043	6.39637	10.3054	10.1215	17.0279	8.79481
Cul4b	1593.6	0.751859	0.239745	3.13609	0.00171219	0.0194548	100.948	59.8313	87.6855	61.7163	101.545	63.9957	113.613	53.7818
Sec31a	2963.02	0.751412	0.191696	3.91982	8.86161e-05	0.00161286	187.708	111.234	188.463	115.273	165.703	116.745	208.958	101.684
Mkrn1	4690.97	0.75125	0.175998	4.26851	1.96784e-05	0.000412636	298.464	174.812	377.444	173.221	263.038	192.094	254.911	159.122
Mapk7	528.555	0.751025	0.372559	2.01586	0.0438151	0.194432	33.6243	19.7021	28.08	18.8434	29.6593	18.1276	43.1336	22.1353
Mib2	2271.84	0.750445	0.222795	3.36833	0.000756264	0.010098	144.599	84.6095	174.165	82.2193	111.285	90.183	148.346	81.4261
Lgr5	60.0894	0.750179	1.07393	0.698534	0.484843	0.713769	4.04327	2.01921	7.06307	1.69417	1.57094	2.11534	3.49579	2.24811
BC068281	249.26	0.750126	0.527998	1.4207	0.155404	0.399871	15.7814	9.36665	15.8488	9.88844	17.3432	8.67556	14.1523	9.53595
Serpinb1c	13.9901	0.749447	1.97314	0.379824	0.704076	0.856246	0.920246	0.491233	0.861351	0.380325	0.377025	0.401646	1.52236	0.691727
Gne	975.992	0.749441	0.323869	2.31402	0.0206665	0.121204	63.8755	34.5932	98.3662	38.2745	60.9524	35.2913	32.3079	30.2136
Letm1	2142.49	0.748804	0.226163	3.3109	0.000929965	0.0119873	137.263	78.895	126.102	74.025	188.198	85.9523	97.4875	76.7076
Nedd9	528.103	0.748238	0.421637	1.7746	0.0759635	0.267724	34.4433	18.8375	54.6096	18.6013	20.3594	20.6178	28.361	17.2932
Srrm1	4145.68	0.748213	0.160806	4.65289	3.2732e-06	8.20393e-05	262.477	155.784	237.905	153.063	292.697	160.578	256.828	153.712
Pitrm1	802.017	0.748212	0.329681	2.26951	0.0232376	0.13065	51.1733	29.7429	48.2356	31.1521	38.5822	30.2841	66.702	27.7926
Ap2b1	7690.77	0.747812	0.142402	5.25141	1.50942e-07	4.72106e-06	487.957	287.972	562.806	291.847	496.228	294.835	404.835	277.234
Tarsl2	1097.46	0.745855	0.278817	2.67507	0.00747138	0.0597156	69.8495	40.874	83.3787	39.2772	75.5935	46.1893	50.5762	37.1556
Fdx1l	49.1079	0.745651	1.16296	0.641165	0.521415	0.741507	3.36277	1.59176	4.82356	1.97077	0.75405	1.12461	4.5107	1.67991
Ganab	706.634	0.745522	0.351759	2.11941	0.0340556	0.166618	45.1741	26.1189	32.559	26.3461	41.7869	27.5529	61.1764	24.4575
Egr2	51.2222	0.745494	1.42034	0.524871	0.599673	0.792396	3.82539	1.34246	0	1.69417	7.98036	1.41915	3.49579	0.914068
Alox5	28.6284	0.74543	1.43784	0.518437	0.604154	0.79479	1.83876	1.04958	2.41178	1.14097	1.13108	1.04428	1.97343	0.963477
Slc4a4	1679.73	0.745275	0.225212	3.30922	0.000935572	0.0120491	106.061	63.4084	111.631	58.7429	89.6691	55.6146	116.884	75.8676
S100a11	98.8498	0.745099	0.842469	0.884422	0.376468	0.627706	6.37258	3.60046	8.26897	3.07717	3.5189	4.04324	7.32989	3.68098
Casp6	104.779	0.744992	0.998099	0.746411	0.455419	0.691273	8.97625	1.59496	24.8069	1.86705	1.44526	1.31204	0.676605	1.60579
Sf3a3	1009.54	0.744878	0.305726	2.43642	0.0148333	0.0964782	64.4178	37.4354	67.3576	34.9553	44.9288	39.9237	80.9671	37.4274
Pcdha5	52.0926	0.744631	1.12951	0.659249	0.509736	0.732325	3.49292	1.76275	1.55043	1.31385	2.38783	2.19567	6.54052	1.77873
Auts2	3925.14	0.744302	0.164623	4.52126	6.14724e-06	0.000144582	247.996	148.014	236.527	151.473	244.375	150.939	263.087	141.631
Hspa5	2452.11	0.743394	0.201545	3.68848	0.000225599	0.0036193	155.152	92.2431	171.236	87.0252	134.598	96.0738	159.622	93.6302
Pgm2	1554.72	0.742204	0.254903	2.91171	0.00359455	0.0342091	99.2955	57.5612	120.761	57.1524	110.028	59.5508	67.0967	55.9805
Btg2	413.731	0.741294	0.42256	1.75429	0.0793805	0.274137	26.1128	15.6289	23.4287	17.979	30.6647	15.0484	24.245	13.8592
Cir1	1122.15	0.741197	0.35629	2.08032	0.0374963	0.176772	72.3892	40.8255	104.74	35.3702	38.9593	50.42	73.468	36.6862
Robo2	1583.86	0.741163	0.22765	3.25571	0.00113111	0.0141059	100.051	59.7468	104.74	58.9503	103.619	61.6661	91.7928	58.6239
Sec16a	2406.57	0.740812	0.194286	3.81301	0.000137286	0.00237388	151.777	91.0241	148.841	97.6743	156.34	91.5754	150.15	83.8225
Atl1	2145.41	0.739863	0.206723	3.57901	0.000344895	0.00523958	135.875	80.5772	126.274	74.5436	165.765	87.9606	115.587	79.2274
Kdm5d	351.719	0.739156	0.550931	1.34165	0.17971	0.431675	23.4259	12.0593	8.61351	13.6917	39.3363	10.2821	22.328	12.204
Ncan	2732.4	0.738609	0.195521	3.77764	0.000158321	0.0026694	173.275	102.399	135.749	95.5652	211.26	104.562	172.816	107.069
Spats2l	2129.84	0.738031	0.246836	2.98996	0.00279012	0.0282196	136.972	77.9094	202.762	77.5517	108.018	84.8545	100.138	71.322
Ncdn	14315.3	0.737521	0.125989	5.85384	4.80364e-09	1.81514e-07	901.98	542.3	951.448	535.324	860.246	600.006	894.246	491.571
Mpp5	1306.65	0.737405	0.253141	2.91302	0.00357953	0.0341488	82.8297	48.9995	102.845	51.8625	70.3152	48.1976	75.3287	46.9386
Vwa5b2	765.127	0.735579	0.314406	2.33958	0.0193053	0.115848	48.3183	28.8761	56.1601	29.4579	40.5302	25.2769	48.2645	31.8936
Irs4	5840.97	0.735476	0.141812	5.18626	2.14563e-07	6.49272e-06	368.207	221.094	391.57	230.961	375.706	229.447	337.344	202.874
Xrn1	961.4	0.735012	0.286387	2.5665	0.0102731	0.0746893	60.7291	36.2674	50.6474	33.9526	69.6868	35.693	61.853	39.1567
Ssh2	2602.26	0.734571	0.189828	3.86966	0.000108987	0.00193166	164.281	98.2635	149.186	96.3259	188.827	101.697	154.83	96.7677
Cntnap4	820.358	0.734543	0.31094	2.36233	0.0181605	0.110764	51.8216	30.9451	58.9164	28.5935	52.3437	32.694	44.2049	31.5477
Ch25h	14.8109	0.734439	2.2367	0.328358	0.742641	0.876938	1.16368	0.330608	0	0.5532	0.5027	0.240988	2.98834	0.197636
Trap1	1244.65	0.734342	0.252922	2.90344	0.00369089	0.0348889	78.3969	47.1772	77.3493	49.8917	76.5361	47.073	81.3054	44.567
Thoc5	623.833	0.734158	0.355555	2.06482	0.0389399	0.18116	39.7274	23.2116	26.0128	20.9524	47.4423	25.4108	45.7272	23.2717
Gbx2	156.897	0.734088	0.738861	0.99354	0.320447	0.58167	10.4749	5.35458	16.8825	4.149	10.9337	6.15858	3.60856	5.75616
Zc3h11a	2058.27	0.734001	0.211526	3.47002	0.000520416	0.00740015	129.742	77.9186	136.61	72.3309	134.661	78.2943	117.955	83.1307
Pelo	473.866	0.733452	0.403394	1.8182	0.0690331	0.254397	29.8632	17.9456	29.8027	16.8726	25.4492	20.8321	34.3377	16.1321
Iqsec2	2674.26	0.732368	0.194673	3.76204	0.000168531	0.00281288	168.305	101.504	176.405	113.648	150.056	101.483	178.455	89.381
Hnrnph1	4515.98	0.732355	0.192378	3.80686	0.000140743	0.0024224	286.338	169.283	358.15	160.082	219.68	184.543	281.186	163.223
Zfp780b	458.665	0.732222	0.416188	1.75935	0.0785174	0.272677	29.3786	16.8966	41.8616	17.4604	25.6377	15.9855	20.6365	17.2438
G630093K05Rik	11.3719	0.732151	2.50974	0.291723	0.770498	0.891742	1.03258	0.114741	2.92859	0.1383	0	0.107106	0.169151	0.0988181
Mmp15	558.632	0.732076	0.375655	1.9488	0.0513196	0.213242	35.1851	21.1758	37.0381	17.8753	39.0849	21.3676	29.4323	24.2846
Lamb1	199.542	0.732065	0.634323	1.15409	0.248464	0.511708	12.8878	7.24417	6.20172	8.12512	15.7722	6.96187	16.6896	6.64552
Lamc1	622.542	0.732058	0.370279	1.97704	0.0480369	0.205156	39.6035	23.2053	48.4079	20.9524	43.1694	24.2059	27.2334	24.4575
Sipa1	439.95	0.731763	0.448151	1.63285	0.102501	0.317262	29.0761	15.3109	48.4079	17.2183	26.0776	15.7445	12.7427	12.9699
Taf1	3423.28	0.731605	0.177532	4.12098	3.77259e-05	0.000742941	216.272	129.106	174.337	124.09	248.774	137.631	225.704	125.598
Clpb	675.438	0.730764	0.353947	2.06461	0.0389595	0.18116	43.1898	24.9558	43.4121	24.8248	28.0255	24.1523	58.1317	25.8903
C4b	57.7811	0.730641	1.34393	0.543661	0.586675	0.785045	4.64351	1.18608	0	1.00267	3.33039	1.41915	10.6001	1.13641
4632415K11Rik	302.611	0.730134	0.577782	1.26368	0.206343	0.462922	21.0593	9.47134	40.4835	10.6145	5.21551	8.14003	17.479	9.65947
Col27a1	42.3038	0.730102	1.37435	0.531233	0.595258	0.790334	3.08472	1.18335	0.17227	1.14097	5.5297	0.803293	3.55218	1.60579
Kif5b	4614.68	0.729887	0.157234	4.64206	3.44957e-06	8.60256e-05	291.433	174.146	263.229	168.38	357.231	192.442	253.84	161.617
Ep300	3663.2	0.729855	0.181208	4.02772	5.63201e-05	0.00107087	231.662	137.922	234.632	140.167	274.851	136.908	185.503	136.69
Etl4	1969.19	0.729683	0.213166	3.42308	0.000619159	0.00857492	124.22	74.4525	142.984	74.3362	114.993	74.1172	114.685	74.9041
Eif2ak2	256.306	0.729251	0.523466	1.39312	0.163584	0.411347	16.3216	9.53732	14.643	8.74747	11.3736	8.32747	22.9482	11.537
Ptrf	494.451	0.728801	0.4136	1.76209	0.0780542	0.271385	31.4083	18.4773	38.4162	17.08	21.3019	20.8856	34.5069	17.4661
Mcoln1	513.834	0.728674	0.375797	1.93901	0.0524999	0.216395	32.4286	19.4125	34.2818	19.846	26.5803	18.208	36.4239	20.1836
Pank4	473.013	0.728358	0.45498	1.60086	0.109409	0.329	31.3248	16.3979	52.5424	17.3912	27.8999	15.7445	13.5321	16.0579
Fgf5	14.5631	0.727861	1.95289	0.372709	0.709365	0.858341	0.894052	0.575236	0.51681	0.311175	1.31959	0.401646	0.845756	1.01289
Abcd3	1831.27	0.727636	0.21928	3.3183	0.000905668	0.0117351	115.645	69.1139	99.2276	65.001	141.761	73.9833	105.945	68.3574
Pygm	425.776	0.727396	0.476347	1.52703	0.126754	0.357204	28.4961	14.4608	50.6474	16.2502	23.5641	13.4953	11.2768	13.6369
1700016K19Rik	117.239	0.727209	0.759566	0.957401	0.338365	0.596234	7.46653	4.36183	5.51264	4.63305	5.21551	2.91863	11.6714	5.53382
Kdm1b	337.042	0.72626	0.456187	1.59202	0.111379	0.331983	21.2095	12.795	20.8447	11.7555	19.1026	12.7456	23.6812	13.8839
Tubb5	21420.9	0.725894	0.128706	5.63992	1.70131e-08	6.05961e-07	1348.11	813.065	1521.32	757.33	1224.83	882.524	1298.18	799.34
Zcchc12	7485.65	0.725713	0.143059	5.07281	3.91979e-07	1.14203e-05	471.487	283.747	542.823	282.616	440.302	300.753	431.336	267.871
Fermt2	1504.1	0.725514	0.236962	3.06173	0.00220061	0.0234522	94.7576	56.992	86.8241	57.9131	87.2185	55.4272	110.23	57.6357
Dip2b	2674.31	0.725363	0.221018	3.28191	0.00103106	0.0130754	170.742	99.0707	232.22	103.31	166.394	96.6897	113.613	97.2123
Anapc1	2021.71	0.725273	0.216	3.35774	0.000785817	0.0104271	127.778	76.1937	117.833	72.1926	159.67	80.8916	105.832	75.497
Nt5c1a	62.3891	0.724854	1.0228	0.708698	0.478512	0.708237	4.0023	2.29219	5.34037	2.0745	2.32499	2.35633	4.34155	2.44575
Igf2r	757.011	0.724732	0.376976	1.92249	0.0545442	0.22133	49.8017	26.5738	22.3951	24.2025	82.1286	28.1956	44.8815	27.3232
Klhl7	2113.26	0.724242	0.230013	3.1487	0.00163996	0.0188247	133.905	79.3037	170.547	77.8628	102.048	83.4889	129.119	76.5593
BC031781	795.974	0.724074	0.374769	1.93205	0.0533528	0.218519	51.9108	28.3958	86.1351	26.3461	33.6809	31.5426	35.9165	27.2985
Usp20	1468.2	0.724005	0.249581	2.90088	0.00372118	0.0351305	92.7545	55.3734	102.501	56.5301	71.5091	55.8824	104.254	53.7077
Rimbp2	2196.33	0.723677	0.209853	3.4485	0.000563709	0.00790254	138.638	82.9519	167.274	83.0837	116.249	80.5167	132.389	85.2553
4933424B01Rik	407.134	0.723123	0.442858	1.63285	0.1025	0.317262	25.9168	15.1593	33.4204	14.0029	27.0201	15.6642	17.3098	15.8109
Dalrd3	885	0.722727	0.331643	2.17923	0.0293147	0.152122	57.1237	32.1648	80.7947	34.4021	60.0727	32.694	30.5036	29.3984
Efhc1	39.019	0.722564	1.55697	0.464083	0.642589	0.81668	2.81455	1.12211	0	1.5213	3.70741	0.856846	4.73624	0.988181
Dnajc21	1852.84	0.722448	0.297333	2.42976	0.0151087	0.0976721	120.754	66.1797	192.943	61.8892	64.7855	68.7619	104.535	67.8881
Nsun5	125.027	0.722092	0.764216	0.944879	0.344721	0.602144	7.82545	4.78864	10.3362	3.35377	7.16348	4.39133	5.97668	6.62081
Sugp2	2647.44	0.72113	0.205741	3.50504	0.000456533	0.00663756	167.536	99.5666	204.14	101.443	173.746	99.1799	124.721	98.077
Stat2	240.797	0.720651	0.554118	1.30054	0.193417	0.448613	15.4613	8.83291	19.2943	10.5108	18.9141	8.35425	8.17565	7.6337
Ahcy	679.814	0.720531	0.383749	1.87761	0.0604345	0.235167	44.0802	24.5069	69.2526	24.0642	25.3235	25.5179	37.6644	23.9387
Gbe1	413.856	0.719649	0.414921	1.73442	0.0828428	0.280824	25.9866	15.7678	28.08	15.3167	26.7059	17.485	23.1737	14.5016
Ppm1d	439.252	0.71925	0.403448	1.78276	0.0746262	0.26548	27.567	16.7495	27.7355	16.5614	26.2661	17.7528	28.6993	15.9344
Brwd1	5070.73	0.718636	0.168273	4.27067	1.9489e-05	0.000409241	319.545	192.045	360.734	203.75	346.486	178.974	251.415	193.412
Bop1	755.557	0.718407	0.332751	2.15899	0.0308508	0.1566	47.4898	28.739	55.2987	24.8248	40.0903	32.2656	47.0804	29.1266
Zkscan4	177.615	0.717985	0.671248	1.06963	0.284787	0.547819	12.0504	5.86941	22.3951	6.32722	9.86549	6.90832	3.89048	4.3727
Sytl5	177.787	0.717555	0.62576	1.14669	0.251508	0.515393	11.2403	6.69676	7.75215	6.5001	10.7452	5.46239	15.2236	8.12779
Pld1	347.925	0.717417	0.47551	1.50873	0.131367	0.364141	22.5877	12.5147	36.1767	13.9337	12.1905	10.4428	19.396	13.1675
Plat	155.291	0.716864	0.674044	1.06353	0.287543	0.550602	10.0151	5.65228	4.65129	4.35645	13.3844	6.39957	12.0097	6.20084
Asb4	1448.86	0.716565	0.273217	2.62269	0.00872375	0.0668577	93.1745	53.0022	143.329	56.7721	76.0334	56.2841	60.1615	45.9504
Tbce	253.282	0.716565	0.597573	1.19912	0.23048	0.492558	16.7651	8.78868	5.68491	8.88577	18.2229	7.84549	26.3876	9.63477
Mad1l1	1073.78	0.716481	0.370413	1.93428	0.0530792	0.217998	71.9197	36.4145	129.03	34.7824	57.7477	40.8876	28.9813	33.5735
Cacna1b	2717.3	0.715795	0.189474	3.7778	0.000158222	0.0026694	170.427	103.723	184.674	100.924	165.577	97.8143	161.032	112.43
Lnx2	146.673	0.715654	0.700009	1.02235	0.306615	0.568905	9.36851	5.42945	6.37399	5.9469	7.91753	5.30173	13.814	5.03972
Ampd3	945.679	0.714447	0.303946	2.35058	0.0187444	0.113258	59.9882	35.4222	81.656	35.7505	48.0707	35.8804	50.2379	34.6358
Brca2	277.609	0.714395	0.510594	1.39914	0.16177	0.408853	17.3896	10.6186	14.4707	11.1677	19.5425	8.75589	18.1556	11.9323
Acot7	8407.03	0.714056	0.169926	4.20216	2.6438e-05	0.000539059	529.53	318.663	620.861	314.805	402.537	350.584	565.191	290.599
5830418K08Rik	977.873	0.713075	0.363743	1.96038	0.0499514	0.209772	64.6422	34.0163	29.2859	33.2957	112.542	34.488	52.0986	34.2652
4932441J04Rik	23.664	0.712827	1.91908	0.371442	0.710308	0.858994	1.76131	0.62617	3.27313	0.449475	2.0108	0.589081	0	0.839954
March7	1288.72	0.712759	0.261961	2.72086	0.0065113	0.0542172	81.4999	48.5204	87.6855	50.4795	99.4718	50.3665	57.3423	44.7152
Rad21	4464.76	0.712724	0.166654	4.27666	1.89718e-05	0.000400642	280.887	169.568	292.687	156.486	331.091	191.933	218.882	160.283
Uba2	2301.55	0.712442	0.222551	3.20126	0.0013683	0.01636	145.884	86.3214	198.8	87.4055	126.932	92.4055	111.922	79.1533
Prx	47.2201	0.71242	1.41697	0.502778	0.615121	0.801066	3.79934	0.964739	0	0.587775	2.82769	1.39237	8.57033	0.914068
Lrrc16a	1556.56	0.712239	0.230728	3.08692	0.00202245	0.0220912	97.7271	59.3155	113.526	62.4078	84.705	53.9009	94.9503	61.6378
Gnpda2	339.599	0.712232	0.48506	1.46834	0.142012	0.380631	21.8666	12.3958	34.1095	12.3778	15.6465	12.8527	15.8438	11.957
Dusp10	224.757	0.711962	0.622059	1.14452	0.252406	0.516306	14.8868	7.7891	26.8741	6.67297	8.48306	8.863	9.30332	7.83134
Gcnt2	133.166	0.711106	0.831522	0.855186	0.392448	0.641864	9.19809	4.23714	13.7816	3.63037	1.63378	4.33778	12.1789	4.74327
Ankrd11	7101.55	0.711102	0.135758	5.23803	1.62302e-07	5.04459e-06	444.59	271.892	430.503	256.754	451.802	292.238	451.465	266.685
1500002O20Rik	380.446	0.711052	0.481708	1.47611	0.139916	0.377112	24.5711	13.8124	37.8994	12.931	13.8243	14.968	21.9897	13.5381
Tyr	126.056	0.711034	0.789215	0.900938	0.367621	0.619835	8.47519	4.24276	15.6766	4.25272	6.5351	3.85581	3.21387	4.61975
Dusp6	533.331	0.71101	0.41363	1.71895	0.0856229	0.285935	34.3437	19.4645	27.0464	19.9498	22.3073	19.8413	53.6773	18.6025
Myst4	2343.16	0.710666	0.22854	3.10959	0.00187344	0.0207683	147.771	88.6331	172.959	86.1263	162.435	83.9441	107.919	95.8289
Cd276	241.326	0.710655	0.670241	1.0603	0.289009	0.551991	17.6382	6.70935	3.4454	6.46552	8.98577	6.07825	40.4835	7.58429
Pde7b	632.467	0.71058	0.343654	2.06772	0.0386665	0.180378	39.6368	24.1734	35.4876	24.3062	43.6721	22.8671	39.7506	25.3468
Grb10	6324.02	0.710417	0.140683	5.04976	4.42376e-07	1.28134e-05	396.548	241.489	447.73	254.887	392.672	248.03	349.241	221.55
Grip1	1022.63	0.710199	0.304262	2.33417	0.0195869	0.116823	65.1075	38.0661	91.4754	37.7904	58.6274	39.5488	45.2198	36.8592
Atxn10	6129.92	0.710045	0.175642	4.04257	5.28691e-05	0.00100846	389.084	229.369	527.491	233.554	370.867	245.701	268.894	208.852
Fbxo38	1641.42	0.710032	0.230984	3.07395	0.00211247	0.0227572	102.837	62.7679	89.5805	64.7589	111.914	66.0574	107.016	57.4874
Unc80	10417.5	0.709821	0.148701	4.77347	1.81083e-06	4.76318e-05	657.482	393.552	856.182	414.243	588.85	365.953	527.414	400.46
Dip2a	2285.87	0.709805	0.198835	3.56981	0.00035724	0.00540506	143.365	87.258	161.417	89.2034	138.997	86.0059	129.683	86.5647
Gphn	2057.68	0.709625	0.242649	2.92449	0.00345023	0.03314	130.049	77.5523	130.408	83.4294	93.1252	79.0172	166.614	70.2103
Rbm25	3937.67	0.709018	0.160477	4.41819	9.95286e-06	0.000222824	246.602	150.673	215.338	134.635	276.548	167.058	247.919	150.327
Cacna1a	3610.38	0.708996	0.179028	3.96026	7.48678e-05	0.0013812	226.326	137.929	222.573	134.877	255.623	131.794	200.783	147.115
Fmod	123.279	0.707316	0.736781	0.960008	0.337051	0.594834	7.70262	4.73509	7.57988	3.76867	9.5513	6.21213	5.97668	4.22447
Car5b	162.722	0.707226	0.78966	0.895609	0.370462	0.622424	11.8895	4.52765	1.7227	4.5639	7.16348	3.85581	26.7823	5.16325
Lemd3	816.464	0.707179	0.413712	1.70935	0.0873861	0.289228	56.3737	26.0001	22.9119	23.3035	29.1566	26.83	117.053	27.8667
Slk	2832.2	0.707069	0.2306	3.06622	0.00216787	0.0231862	180.359	105.384	249.103	103.414	175.317	105.472	116.658	107.267
Nckipsd	935.705	0.705966	0.319368	2.21051	0.0270695	0.144861	60.2222	34.1819	93.7149	37.7559	50.5842	33.7115	36.3675	31.0783
Sec24b	2065.01	0.705939	0.20411	3.45862	0.00054296	0.00766043	129.168	79.1723	123.862	80.0411	128.377	77.0626	135.265	80.4133
Kpna2	771.949	0.705437	0.33618	2.09839	0.0358704	0.172005	48.7503	29.1323	65.8072	27.3834	42.6667	33.6044	37.7771	26.4091
Dusp4	309.435	0.705095	0.519298	1.35778	0.174532	0.425554	19.5081	11.7111	12.0589	14.2795	22.5587	10.5767	23.9067	10.2771
Xylt2	388.427	0.702975	0.477787	1.47132	0.141206	0.379472	24.487	14.7018	29.2859	10.822	15.081	17.3243	29.094	15.9591
Ccnj	285.735	0.702941	0.5586	1.2584	0.208248	0.46506	18.8812	9.9469	32.9036	9.99217	15.3952	9.39853	8.3448	10.45
P2rx5	18.7322	0.702774	1.77823	0.395211	0.692687	0.849428	1.13561	0.754292	1.03362	0.656925	1.69661	0.321317	0.676605	1.28464
5730559C18Rik	249.569	0.70264	0.537782	1.30655	0.191366	0.445851	15.7076	9.47161	13.2648	9.61184	13.4472	9.93405	20.4109	8.86893
Shank2	3605.7	0.702438	0.167505	4.19353	2.74645e-05	0.000556314	225.389	138.393	206.724	136.467	232.687	133.721	236.755	144.991
Mfsd4	270.703	0.70237	0.521812	1.34602	0.178295	0.429733	17.3142	9.99728	23.4287	10.3725	9.17428	8.03293	19.3396	11.5864
Scrt1	1285.53	0.70223	0.286256	2.45315	0.014161	0.0933287	81.6928	48.0059	117.144	49.131	70.8179	43.3778	57.1167	51.5089
Sash1	3728.42	0.702099	0.169828	4.13418	3.56226e-05	0.000704315	232.949	143.215	216.199	151.888	244.878	137.658	237.77	140.099
Ptprd	3074.38	0.702086	0.185541	3.78399	0.000154334	0.00262597	192.329	117.848	212.754	109.326	171.232	119.262	193.002	124.956
Shq1	106.154	0.701791	0.785213	0.893759	0.371451	0.622906	6.6319	4.07811	6.71853	4.25272	6.97496	4.17712	6.20221	3.8045
Ift81	1218.63	0.701517	0.297139	2.3609	0.0182306	0.110918	78.3007	44.6477	123.345	46.9874	55.7369	45.9216	55.8199	41.0342
Timm44	1208.93	0.699885	0.25578	2.73628	0.00621388	0.0523555	75.5325	46.4379	80.2779	45.0858	74.1483	47.3139	72.1712	46.9139
Hgs	2566.77	0.699467	0.208927	3.34791	0.00081424	0.0107468	161.725	97.239	210.686	97.9509	152.192	105.151	122.296	88.6152
Edc4	1399.05	0.699017	0.251775	2.77635	0.00549723	0.0478054	88.1629	52.9887	85.7905	54.0407	114.364	56.8999	64.3339	48.0256
Dnmt3a	19431.1	0.698328	0.115022	6.07126	1.26912e-09	5.27784e-08	1213.71	746.703	1314.59	730.673	1191.71	774.401	1134.84	735.034
Hnrnpm	3285.2	0.69807	0.178356	3.91391	9.08139e-05	0.00164682	205.173	126.274	200.178	119.975	189.581	134.632	225.761	124.214
Ctnnbl1	709.363	0.69791	0.399351	1.74761	0.0805316	0.277215	46.6801	24.8881	17.0547	22.1626	50.0815	25.9196	72.9042	26.5821
Ints4	611.316	0.697537	0.379443	1.83832	0.0660156	0.24809	38.4486	23.2276	26.0128	26.1041	42.4782	20.7517	46.8549	22.827
Rnaseh1	200.683	0.697183	0.656269	1.06234	0.288079	0.55078	13.5467	6.70039	26.1851	6.81127	8.98577	6.05147	5.46922	7.23843
Bcar1	1642.08	0.696488	0.298304	2.33483	0.0195523	0.116765	105.345	60.3263	153.665	63.0302	55.297	64.9328	107.073	53.0159
Slc3a1	8.78364	0.696427	2.70553	0.257409	0.796863	0.904659	0.633129	0.25306	0	0.380325	0.377025	0.107106	1.52236	0.27175
Gpc4	136.352	0.696177	0.737363	0.944144	0.345096	0.602364	8.7987	4.95802	14.1261	4.25272	5.27835	5.08752	6.99159	5.53382
Gramd4	698.773	0.695846	0.332448	2.0931	0.0363406	0.173299	43.9125	26.5874	35.4876	23.6839	38.4566	27.1245	57.7934	28.9537
Ppan	244.87	0.695364	0.560413	1.24081	0.214677	0.474342	15.9184	8.78678	27.0464	9.71557	9.48847	8.54168	11.2204	8.10309
Add1	6323.46	0.694787	0.152465	4.55702	5.18855e-06	0.000124592	394.57	243.41	415.688	234.003	352.644	262.891	415.379	233.334
Cct5	5929.24	0.694161	0.189979	3.65389	0.000258301	0.00408236	375.769	222.437	535.243	218.618	307.778	229.983	284.287	218.709
Rbm5	3659	0.692188	0.196441	3.52364	0.000425663	0.00625595	229.823	139.337	287.691	131.627	227.158	144.753	174.621	141.631
Sin3b	3353.48	0.690981	0.187484	3.68555	0.000228208	0.00365329	210.108	128.228	196.905	132.941	171.798	123.6	261.621	128.142
Pou2f2	547.617	0.690641	0.377516	1.82943	0.0673347	0.251026	34.4225	20.8271	40.1389	21.7131	38.7707	20.1894	24.3578	20.5789
Arcn1	3723.56	0.690596	0.208022	3.31982	0.000900764	0.0116936	234.178	141.496	167.274	140.547	231.745	156.267	303.514	127.673
Wdr20a	455.596	0.690436	0.398101	1.73432	0.0828608	0.280824	28.4142	17.5513	24.6346	17.7024	31.7958	18.449	28.8121	16.5026
Pou3f4	95.4958	0.689551	0.868838	0.793647	0.427401	0.669523	6.17761	3.45705	3.4454	3.25005	4.71281	4.23068	10.3746	2.89043
Dopey1	1413.2	0.689367	0.280576	2.45697	0.0140115	0.0927126	89.5972	52.9816	92.6813	54.9051	120.46	51.5178	55.6508	52.5218
Tgm2	111.479	0.689063	0.816065	0.844373	0.398461	0.646426	7.4548	3.79244	13.4371	3.80325	6.22091	4.33778	2.70642	3.23629
Puf60	4231.09	0.688877	0.185904	3.70554	0.000210937	0.00342468	266.176	160.703	305.607	155.76	310.857	173.377	182.063	152.97
Baz1a	68.815	0.688643	1.03242	0.667016	0.504762	0.728187	4.70584	2.23696	1.37816	2.31652	9.29995	2.19567	3.43941	2.1987
Stxbp1	25143.2	0.688589	0.115164	5.9792	2.24232e-09	8.83167e-08	1564.75	971.966	1605.39	984.419	1480.51	1037.08	1608.35	894.403
Lyar	429.535	0.688481	0.436399	1.57764	0.114648	0.337449	27.1759	16.1603	26.0128	13.6225	17.3432	17.244	38.1718	17.6143
Acin1	4900.5	0.688025	0.152341	4.51636	6.29126e-06	0.000147736	305.43	188.986	261.678	176.54	342.527	207.999	312.084	182.418
BC024479	328.167	0.687643	0.534952	1.28543	0.198643	0.454634	21.2392	11.8698	33.5927	10.2342	19.9195	11.862	10.2055	13.5134
Sf1	4873	0.687482	0.219016	3.13896	0.00169549	0.0193281	311.396	180.245	202.59	185.737	479.45	177.447	252.148	177.551
Kcnh6	180.04	0.686545	0.675903	1.01574	0.309751	0.572378	12.0494	6.11494	20.1556	6.11977	3.64458	5.06074	12.348	7.16431
Trpc4ap	3109.13	0.686304	0.175845	3.9029	9.50453e-05	0.00171312	193.408	120.275	185.363	120.217	197.687	126.572	197.174	114.036
Nol11	634.17	0.686236	0.343705	1.99658	0.0458705	0.199509	39.4759	24.5061	43.2398	23.6493	36.5086	26.6961	38.6793	23.1729
Hmmr	178.308	0.68593	0.669028	1.02526	0.305239	0.567675	11.5556	6.43408	13.9539	5.15167	4.58714	6.31924	16.1258	7.83134
Ankrd27	686.139	0.685746	0.408426	1.679	0.093153	0.300215	44.7405	24.4847	72.0089	24.0642	42.4782	24.0185	19.7343	25.3716
C330006K01Rik	234.593	0.685627	0.632823	1.08344	0.278612	0.540847	15.7079	7.96043	17.9161	9.19694	4.39863	7.47062	24.8089	7.21372
Arfgef2	2058.79	0.685093	0.217655	3.14761	0.00164612	0.0188664	128.749	78.9641	137.816	82.5996	99.409	76.4735	149.022	77.8193
Trappc8	1277.53	0.684813	0.269519	2.54088	0.0110575	0.0786549	79.9328	48.9585	60.6391	50.7906	96.8955	47.3675	82.2639	48.7173
Ankrd52	3076.49	0.684543	0.178831	3.82788	0.00012925	0.00225326	191.363	119.027	201.039	129.76	200.515	111.925	172.534	115.395
Fech	1026.5	0.684435	0.292003	2.34393	0.0190816	0.11495	64.4239	39.1407	82.0006	38.6548	62.8375	39.7094	48.4336	39.0579
Vps4b	924.925	0.684281	0.317596	2.15456	0.0311959	0.157546	59.1459	34.1706	93.1981	38.1362	44.489	32.8279	39.7506	31.5477
Ttc30b	210.627	0.684202	0.580171	1.17931	0.238274	0.500247	13.2287	8.02162	15.6766	7.84852	9.23712	8.11326	14.7725	8.10309
Iglon5	1533.72	0.684058	0.272045	2.51451	0.0119199	0.082811	96.9299	57.8086	137.988	55.1125	79.6151	56.5518	73.1861	61.7613
Sp110	49.5489	0.683669	1.16318	0.587756	0.556696	0.765149	3.17027	1.82877	3.61767	1.45215	1.38243	2.32955	4.5107	1.70461
Ggnbp2	1987.51	0.683577	0.219677	3.11174	0.00185989	0.0206488	123.912	76.6094	145.568	74.8202	108.835	82.2036	117.335	72.8043
Pex1	710.579	0.683519	0.370252	1.84609	0.0648785	0.245501	45.3643	26.3266	30.3195	28.7664	34.5606	24.1256	71.2127	26.088
Kcne1l	78.6423	0.683385	0.925603	0.738313	0.460324	0.694921	4.99808	2.93621	7.23534	2.52397	3.07904	2.99896	4.67985	3.2857
Ptprf	2470.26	0.68337	0.191839	3.56221	0.000367743	0.00552468	153.582	95.6444	142.295	89.7221	163.566	94.1191	154.886	103.092
Maob	391.067	0.683348	0.424409	1.61012	0.107372	0.325795	24.3212	15.1339	25.496	15.6625	24.6323	14.6199	22.8354	15.1192
Dcaf13	396.087	0.682248	0.437034	1.56108	0.118504	0.343674	24.7244	15.2372	29.1136	13.1385	25.8891	17.0834	19.1705	15.4897
Snap47	9092.91	0.681678	0.137669	4.95157	7.36173e-07	2.06795e-05	565.324	352.068	615.521	356.261	512.44	375.352	568.01	324.593
Ide	1132.18	0.681276	0.286348	2.37919	0.0173509	0.10741	71.242	42.9846	97.8494	42.873	61.0152	46.109	54.8614	39.9719
Sstr3	231.04	0.681208	0.605487	1.12506	0.260565	0.524299	14.9195	8.39032	21.5338	6.98415	6.5351	8.67556	16.6896	9.51124
Baz1b	3554.24	0.680956	0.186142	3.65825	0.000253943	0.00402631	222.053	136.538	247.724	133.494	247.14	138.836	171.294	137.283
Ttc4	954.794	0.680857	0.288717	2.35822	0.0183629	0.111314	59.4099	36.9201	58.3996	37.8942	52.8464	37.8351	66.9839	35.031
Arid5b	1224.48	0.680603	0.27196	2.50258	0.0123291	0.0845487	76.1794	47.3591	83.3787	45.0858	63.4031	53.3386	81.7565	43.6529
Dio2	229.126	0.68056	0.595236	1.14335	0.252895	0.516404	14.818	8.29878	24.8069	7.91767	8.48306	9.34497	11.164	7.6337
D10Wsu52e	2886.55	0.678748	0.183244	3.70407	0.000212171	0.00343722	179.08	112.147	182.779	106.007	177.642	124.377	176.819	106.057
Prss45	13.1781	0.678728	2.31791	0.292819	0.769661	0.891659	1.00472	0.324829	0	0.449475	0.25135	0.0803293	2.7628	0.444682
Gpam	919.733	0.678643	0.286828	2.36603	0.0179802	0.110165	57.1918	35.6009	49.7861	31.9473	54.3545	34.8094	67.435	40.046
Usp24	2943.67	0.678403	0.197076	3.44234	0.000576712	0.00806964	183.859	113.131	196.216	115.861	214.402	111.176	140.959	112.356
Nhlrc2	414.83	0.678079	0.487757	1.3902	0.164469	0.412572	27.2114	14.6412	48.0634	13.7954	19.9823	14.5396	13.5885	15.5886
Slc26a2	104.555	0.677265	0.875899	0.773223	0.43939	0.678447	6.92591	3.62277	12.2312	2.66227	2.5135	4.2039	6.03306	4.00213
Plxna3	469.546	0.677265	0.436148	1.55283	0.120464	0.347368	29.9986	17.3744	15.8488	16.2502	44.489	16.3068	29.6579	19.566
Med24	1129.22	0.676625	0.268103	2.52374	0.0116112	0.081388	70.2708	43.6573	69.9417	44.3943	60.0727	43.2707	80.7979	43.307
Itga1	70.229	0.676323	0.9765	0.692599	0.488561	0.715745	4.53303	2.55244	2.06724	2.3511	3.58174	1.84757	7.95011	3.45863
Pold3	676.196	0.675785	0.347892	1.94252	0.0520747	0.215128	42.2017	26.0203	49.9583	25.7929	32.0471	28.0081	44.5996	24.2599
Glod5	27.2594	0.675616	1.71994	0.392814	0.694457	0.850463	2.08847	0.661762	0	0.48405	2.26215	0.883622	4.00325	0.617613
Tdrd6	122.634	0.675482	0.765998	0.881832	0.377867	0.62899	8.02711	4.34559	13.2648	4.94422	3.20471	3.69515	7.61181	4.39741
Hnrnpf	2402.29	0.675361	0.230876	2.92521	0.00344226	0.033127	150.314	92.0559	194.665	86.3683	114.301	101.456	141.974	88.3434
Map4k4	5721.65	0.67495	0.146241	4.61532	3.92496e-06	9.67212e-05	355.429	221.833	298.716	203.37	392.169	244.629	375.403	217.499
Nrtn	45.2134	0.674909	1.20352	0.56078	0.574948	0.777062	2.98131	1.58031	1.7227	1.76332	5.5297	1.44593	1.69151	1.53168
Rlf	1367.73	0.674695	0.322262	2.09362	0.0362936	0.173299	89.5295	48.4622	158.488	49.8571	62.9632	48.1708	47.1368	47.3586
Nop2	570.587	0.674212	0.358769	1.87924	0.0602123	0.234609	35.3877	22.1793	37.5549	20.9524	33.9323	24.0185	34.676	21.5671
Plekhm2	1308.67	0.67311	0.268896	2.50323	0.0123064	0.0844711	82.3924	49.6406	116.799	52.6231	68.8071	51.0894	61.5711	45.2093
Atp6v1h	1926.65	0.672748	0.208862	3.22102	0.00127737	0.0155372	119.451	74.9311	119.555	74.0596	122.533	77.4107	116.263	73.3231
Gemin6	97.176	0.672299	0.960063	0.700265	0.483762	0.712882	6.58315	3.22103	9.99167	2.55855	1.13108	4.01646	8.62672	3.08807
Fzd1	369.48	0.672126	0.495234	1.35719	0.174721	0.425819	23.8295	13.4477	24.1178	13.7954	11.0594	13.6024	36.3111	12.9452
Arid3b	144.669	0.671984	0.771415	0.871106	0.383697	0.635072	9.78217	4.81361	2.06724	4.32187	15.2695	4.98042	12.0097	5.13854
Pnpt1	414.246	0.671875	0.450391	1.49176	0.135762	0.370459	26.3449	15.4488	35.8322	17.0109	29.2194	14.1915	13.9832	15.1439
Rasgrf2	5021.19	0.67127	0.187597	3.57827	0.000345883	0.00524924	316.205	190.387	427.747	199.186	313.434	191.21	207.436	180.763
Rapsn	17.4269	0.670987	2.06491	0.324947	0.745221	0.87887	1.29207	0.466145	0	0.48405	1.5081	0.642634	2.36812	0.27175
Pds5b	4218	0.67047	0.200927	3.33688	0.000847249	0.0111233	263.438	162.12	184.846	173.843	306.521	161.917	298.947	150.599
Plcb4	4514.45	0.670283	0.17413	3.84932	0.000118446	0.00208689	279.598	175.869	312.153	156.486	259.268	199.672	267.372	171.449
Col6a2	105.322	0.669821	0.879727	0.761397	0.44642	0.684128	7.44987	3.17616	9.99167	3.3192	11.6249	4.57877	0.732989	1.6305
Heatr7a	1339.32	0.669558	0.248637	2.69292	0.00708303	0.0573733	83.346	51.7793	82.6897	51.0327	100.477	55.9092	66.8711	48.3962
Kif5c	21441.1	0.669507	0.131463	5.09273	3.52953e-07	1.0344e-05	1329.34	833.87	1386.26	771.368	1449.79	817.484	1151.98	912.758
Pgm3	289.464	0.669463	0.502515	1.33222	0.182786	0.435482	18.1766	11.0277	14.4707	10.9257	25.512	11.4603	14.547	10.6971
Gdi1	12647	0.668959	0.127869	5.2316	1.68045e-07	5.20136e-06	784.906	491.061	908.897	498.329	726.025	512.287	719.795	462.568
Tecpr1	1934.65	0.66882	0.238947	2.79903	0.00512559	0.0454225	120.836	74.3522	158.316	70.4292	100.729	80.8113	103.464	71.8161
Clcn6	767.713	0.66878	0.398798	1.67699	0.0935447	0.300993	50.191	27.2643	88.7191	25.4472	35.6917	27.071	26.1621	29.2749
2310061I04Rik	1267.62	0.668337	0.253771	2.63362	0.00844799	0.0653709	78.8275	49.0644	96.9881	53.7987	66.9848	48.0369	72.5095	45.3575
Gli1	163.998	0.668256	0.654328	1.02129	0.307118	0.569554	10.4057	6.14021	16.1934	7.3299	8.48306	5.08752	6.54052	6.0032
Nfasc	6723.77	0.668166	0.143091	4.6695	3.01929e-06	7.59815e-05	416.389	261.978	440.322	248.525	413.031	259.062	395.814	278.346
Rnf19a	897.583	0.66787	0.30577	2.18422	0.0289459	0.151051	56.0582	34.4998	71.1476	34.1947	42.7295	33.9525	54.2976	35.3522
Fbxo11	4569.17	0.667714	0.161497	4.13454	3.55674e-05	0.000704159	283.163	177.826	313.359	172.564	262.724	188.747	273.405	172.166
Acsl4	1312.88	0.667148	0.259035	2.57551	0.0100091	0.0731765	81.7515	50.7061	62.3618	46.6416	82.1915	55.4004	100.701	50.0761
Dennd4b	1021.72	0.666905	0.275518	2.42055	0.0154969	0.099362	63.2544	39.828	61.845	42.3543	59.1301	37.7012	68.7882	39.4284
Rhox8	327.464	0.666801	0.509643	1.30837	0.190749	0.445174	20.974	12.0642	19.9833	9.71557	10.1797	12.3707	32.759	14.1063
Caprin1	8162.08	0.666611	0.146177	4.56031	5.10778e-06	0.00012305	507.363	316.117	615.004	316.154	487.87	340.784	419.213	291.415
Stard13	318.925	0.666494	0.492583	1.35306	0.176036	0.427542	20.054	12.1226	12.5757	12.5161	20.2965	11.3264	27.2897	12.5252
1600027N09Rik	230.363	0.666301	0.570352	1.16823	0.242715	0.504825	14.6729	8.56862	16.8825	9.81929	7.28915	7.36352	19.8471	8.52306
Cpt1c	654.248	0.666272	0.487825	1.3658	0.172001	0.422567	45.7259	20.2818	95.4376	20.7796	30.3505	19.0916	11.3895	20.9741
Mfge8	297.39	0.66621	0.50664	1.31496	0.188525	0.442009	18.7149	11.2891	22.7397	9.71557	10.6824	10.0947	22.7227	14.0569
Cdkn1a	518.547	0.66602	0.398652	1.67068	0.094785	0.302954	32.799	19.5177	49.2693	20.1572	28.7167	22.7332	20.4109	15.6627
Zfp292	2356.16	0.665288	0.222679	2.98766	0.00281124	0.0283179	147.335	90.3796	99.5721	88.3736	165.388	89.7278	177.045	93.0373
Rprd2	2485.86	0.665	0.19616	3.39009	0.000698703	0.00948249	153.829	96.9718	159.867	109.568	168.216	91.2005	133.404	90.1468
Cntnap1	2481.31	0.664995	0.240417	2.76601	0.00567474	0.0488355	157.6	92.7414	240.317	95.1158	131.896	97.0378	100.589	86.0706
Dnm2	1213.09	0.664781	0.26793	2.48118	0.0130949	0.088256	75.8219	46.5678	100.778	51.9316	70.755	43.0565	55.9327	44.7152
Samhd1	571.705	0.664707	0.363848	1.82688	0.0677176	0.25173	35.626	22.0538	45.307	22.8541	29.0938	21.7157	32.477	21.5918
Pcnx	3556.49	0.664698	0.179676	3.69943	0.000216084	0.00348543	220.836	137.981	239.455	128.757	175.191	133.427	247.863	151.76
Rgag4	1860.85	0.664332	0.238611	2.78417	0.00536652	0.0469705	115.783	71.9595	90.0973	75.4426	113.924	72.6712	143.328	67.7645
Prrc1	819.561	0.664204	0.393605	1.68749	0.0915093	0.29779	54.6201	28.0661	104.912	28.7664	27.7113	27.071	31.2366	28.3608
Adsl	648.605	0.664061	0.382458	1.7363	0.0825109	0.280782	41.5074	23.9309	67.1853	24.0296	27.3972	22.7867	29.9398	24.9763
Rasgrp2	1195.73	0.663872	0.270912	2.4505	0.0142657	0.0937691	74.5782	46.0606	95.0931	46.6416	57.9362	45.1451	70.7052	46.3951
Pspc1	1776.18	0.663726	0.27025	2.45597	0.0140505	0.0928882	110.561	68.639	138.333	60.7828	78.6097	81.6681	114.741	63.4659
Ncoa4	2092.5	0.662903	0.226648	2.92481	0.00344665	0.033127	130.995	80.1191	167.447	85.4002	136.734	79.3118	88.8044	75.6453
Gpi1	8913.9	0.662673	0.146401	4.52641	5.99933e-06	0.000141347	554.364	344.967	695.454	353.702	482.906	353.395	484.731	327.804
BC068157	1580.3	0.662565	0.234268	2.82823	0.00468064	0.0422537	98.2595	61.1781	113.526	69.7032	109.589	60.5683	71.6638	53.263
Hap1	44645.9	0.662518	0.105516	6.27885	3.41093e-10	1.48485e-08	2761.75	1742.61	3015.24	1733.28	2761.21	1869.8	2508.8	1624.77
Edc3	519.403	0.662237	0.409254	1.61816	0.105629	0.32252	32.8627	19.5403	49.4415	19.1545	26.7059	18.3686	22.4407	21.0977
Camta1	15014.7	0.661916	0.127095	5.20803	1.90857e-07	5.8108e-06	931.522	583.32	978.322	596.799	1056.36	590.393	759.884	562.769
Gpatch8	3051.86	0.661138	0.203073	3.25566	0.00113127	0.0141059	189.694	118.211	162.106	111.988	240.982	112.648	165.994	129.995
Rela	531.046	0.661102	0.438381	1.50805	0.131541	0.364342	33.8022	19.7756	37.5549	19.1545	16.7148	22.0638	47.1368	18.1084
Pcsk2	1771.46	0.660798	0.21736	3.04011	0.00236493	0.0248651	109.571	69.1531	96.299	65.1047	125.172	77.0358	107.242	65.3188
Ndor1	347.793	0.660342	0.455314	1.4503	0.146975	0.387422	21.6121	13.477	23.601	13.4842	16.6519	13.3347	24.5833	13.6122
Srd5a3	155.613	0.660188	0.699929	0.943221	0.345568	0.602578	10.2327	5.46725	5.1681	5.2554	6.47226	5.16785	19.0577	5.9785
Rnf165	2047.52	0.660115	0.215365	3.0651	0.00217594	0.0232392	127.193	79.3834	157.455	83.706	118.574	74.5991	105.55	79.845
Ddx21	808.639	0.659943	0.307616	2.14535	0.0319252	0.159981	50.1319	31.4524	44.2734	31.4287	61.0152	33.6044	45.107	29.3243
Leng8	1041.82	0.659607	0.330994	1.9928	0.0462828	0.200697	65.44	39.6702	39.7944	46.0539	57.6848	29.4273	98.8407	43.5294
Nsd1	10262.1	0.659505	0.122869	5.36756	7.98095e-08	2.61144e-06	634.038	401.314	664.101	414.277	631.831	405.583	606.182	384.081
Hdlbp	5458.26	0.659473	0.146283	4.50818	6.53851e-06	0.000151865	337.121	213.567	357.288	221.937	329.08	221.869	324.996	196.895
Slc22a15	283.53	0.659202	0.551001	1.19637	0.231552	0.493483	18.5834	10.0222	32.559	10.8911	7.85469	9.63951	15.3364	9.53595
Nsun3	120.875	0.659172	0.767493	0.858864	0.390416	0.640215	7.68299	4.51221	5.34037	4.8405	5.5297	4.47166	12.1789	4.22447
G6pdx	712.529	0.659061	0.323673	2.03619	0.0417308	0.189187	44.0707	27.817	50.6474	29.4925	40.4045	28.7847	41.1601	25.1739
Fzd2	85.0652	0.658987	1.13208	0.582104	0.560496	0.768303	6.41517	2.16713	6.54626	1.59045	0.125675	1.84757	12.5736	3.06336
Ccdc19	304.676	0.658696	0.478334	1.37706	0.168493	0.418493	18.8331	11.9059	16.8825	11.6518	20.108	11.862	19.5088	12.204
Snrk	3505.14	0.658027	0.190776	3.44922	0.000562202	0.00788885	218.646	134.99	290.447	139.026	191.717	137.283	173.775	128.661
Hsp90aa1	38092	0.65791	0.116989	5.6237	1.86909e-08	6.60974e-07	2351.58	1491.55	2538.23	1392.89	2208.17	1641.48	2308.35	1440.3
A430110N23Rik	63.652	0.657587	1.33768	0.491586	0.623012	0.806137	5.45802	0.963886	0	1.1064	1.31959	0.722964	15.0545	1.06229
Zfp442	97.2644	0.656638	0.853318	0.769511	0.44159	0.680172	6.39324	3.41986	10.5085	3.76867	6.47226	3.7487	2.19897	2.7422
Diap1	736.634	0.655929	0.332524	1.97258	0.048544	0.206364	45.9476	28.3721	38.4162	24.9977	36.4458	29.5344	62.9807	30.5842
Adck5	129.295	0.655737	0.723712	0.906074	0.364897	0.618084	8.04823	4.9965	6.20172	5.08252	10.5567	5.1143	7.38627	4.79268
Shisa3	64.2782	0.655435	1.04372	0.627981	0.530016	0.747206	4.29364	2.19145	3.61767	1.69417	1.25675	2.08856	8.00649	2.79161
Zc3h3	554.18	0.655225	0.379921	1.72464	0.0845931	0.284016	34.1913	21.7205	28.7691	25.7929	41.1586	20.2965	32.6462	19.0719
Slc35c2	563.558	0.65508	0.363473	1.80228	0.0715013	0.259131	34.8829	21.975	39.4499	21.3328	29.2823	22.037	35.9165	22.5552
Psg29	13.2694	0.65455	2.28847	0.28602	0.774863	0.893779	1.02997	0.308795	0	0.34575	0.439863	0.160659	2.65004	0.419977
Pcca	367.973	0.654271	0.467275	1.40018	0.161458	0.408669	23.3972	13.7279	36.6935	14.2449	18.7256	13.8702	14.7725	13.0687
Zfyve19	352.205	0.654182	0.491804	1.33017	0.183463	0.435985	22.4494	13.0849	36.0045	12.2395	14.7668	14.2183	16.5768	12.7969
1300002E11Rik	178.255	0.653854	0.696558	0.938693	0.347888	0.60516	12.2138	5.7705	25.1514	5.77402	4.27295	5.1143	7.21712	6.42318
Mcmbp	657.059	0.653802	0.362627	1.80296	0.0713943	0.258945	41.1464	25.1448	45.9961	25.4818	26.0776	25.2234	51.3656	24.7292
4933401P06Rik	39.1466	0.653639	1.33269	0.490465	0.623805	0.806391	2.97826	0.971267	7.57988	1.14097	0.565538	0.562305	0.789373	1.21052
Kri1	672.722	0.653613	0.356661	1.83259	0.0668636	0.250054	41.8392	26.0323	44.4457	22.6466	51.5268	27.312	29.5451	28.1385
2610008E11Rik	236.06	0.652863	0.6089	1.0722	0.283629	0.546837	15.5766	8.23969	11.3698	9.54269	6.66078	7.44385	28.6993	7.73252
Slc27a3	165.594	0.652588	0.661023	0.98724	0.323525	0.583915	10.4101	6.29683	5.85718	6.32722	12.6303	6.23891	12.7427	6.32436
Arhgap32	4278.95	0.652544	0.166198	3.92631	8.62581e-05	0.00157186	264.838	166.869	300.784	177.992	280.318	162.158	213.413	160.456
Fam59a	1089.44	0.652207	0.309405	2.10794	0.0350361	0.169497	68.6721	41.2426	103.018	40.3836	51.4639	44.5828	51.5348	38.7614
Hist1h3i	132.679	0.651936	1.15983	0.562098	0.57405	0.776809	10.1038	3.28227	14.2984	3.66495	0	3.26672	16.013	2.91513
Pdp2	274.294	0.651752	0.530066	1.22957	0.218859	0.479057	17.2735	10.4003	23.4287	9.75014	10.1797	10.3089	18.212	11.1417
Cx3cr1	152.255	0.651189	0.716663	0.908641	0.36354	0.617506	9.91094	5.45024	12.9203	4.87507	3.39323	4.95364	13.4193	6.522
Anxa5	726.711	0.650678	0.363923	1.78795	0.0737836	0.263933	46.5264	26.7921	76.6602	28.9393	27.3972	25.5715	35.5218	25.8656
H2afx	708.988	0.649532	0.339937	1.91075	0.0560373	0.225787	44.2444	27.286	60.1223	28.6627	39.9647	25.9464	32.6462	27.2491
Hdac1	642.58	0.649398	0.339071	1.91522	0.0554639	0.223901	39.6598	25.1707	36.349	23.1998	36.5086	25.7054	46.1219	26.6068
Plcxd1	599.499	0.64921	0.47636	1.36286	0.172928	0.424142	42.2951	18.1889	94.5763	19.9498	17.029	16.3604	15.28	18.2566
Plin2	139.56	0.648522	0.882344	0.734999	0.46234	0.69627	9.93813	4.14217	0.68908	3.8724	14.5783	4.55199	14.547	4.00213
[truncated: 12,600 more rows]
