# Supplementary material for: Developmental single-cell transcriptomics of hypothalamic POMC neurons reveal the genetic trajectories of multiple neuropeptidergic phenotypes
Source: eLife. 2022 Jan 19;11:e72883. doi: 10.7554/eLife.72883 (PMC8806186; doi:10.7554/eLife.72883)
Supplement: Figure 5—source data 2. [file elife-72883-fig5-data2.xlsx]

## Sheet: p60_final_combine_mean_stat
Figure 5-Source Data 2 (corresponding to Figure 5).
Differentially expressed genes by RNA TRAP-seq between pull-down vs. supernatant at age P60. Raw reads were normalized to counts per million (CPM). DESeq2 with a mixed model of pair and treatment (pulldown vs. supernatant) was used for statistical analysis.
The data are ordered by log2FoldChange from greatest to lowest and presented as the means and individual results from three experimental replicates.
GeneID	baseMean	log2FoldChange	lfcSE	stat	pvalue	padj	Pull_Down_CPM_Mean	Supernatant_CPM_Mean	Pull_Down_CPM_1	Supernatant_CPM_1	Pull_Down_CPM_2	Supernatant_CPM_2	Pull_Down_CPM_3	Supernatant_CPM_3
Pomc	29379.9	6.97269	0.160611	43.4136	0	0	3624.1	31.8652	2996.71	22.9423	2899.5	16.8444	4976.11	55.8088
Fgf16	11.7354	6.71408	2.05631	3.26512	0.00109418	0.0143207	1.46033	0	0.141294	0	2.80835	0	1.43136	0
Ltf	8.06082	6.38007	2.31568	2.75516	0.00586638	0.0506252	1.00307	0	0.211941	0	0.854715	0	1.94255	0
Galp	5.71846	6.04433	2.62551	2.30216	0.0213263	0.122535	0.711592	0	0.423883	0	1.40417	0	0.306719	0
Klk7	13.6929	5.9971	2.06147	2.90914	0.00362421	0.036325	1.70391	0	0.777118	0	4.33462	0	0	0
Speer3	4.62689	5.74913	2.85335	2.01487	0.0439183	0.193853	0.57576	0	0.423883	0	1.09892	0	0.204479	0
Afp	8.89604	5.68975	2.42281	2.34841	0.0188537	0.112967	1.107	0	0	0	2.50309	0	0.817917	0
A130040M12Rik	14757.3	5.50148	0.159733	34.4417	5.98993e-260	4.66256e-256	1796.09	40.2677	2067.28	34.1299	1612.18	34.0159	1708.83	52.6574
Tlr12	8.05223	5.47131	2.49846	2.18987	0.0285336	0.14807	0.961117	0.0408845	1.55424	0	0	0.122654	1.32912	0
Cd70	14.0467	5.22235	1.98643	2.62901	0.00856343	0.0661615	1.73076	0.0171852	0	0.0515557	4.57883	0	0.613438	0
Alb	5.07427	5.05652	3.00957	1.68014	0.0929294	0.299771	0.631431	0	0.565177	0	0	0	1.32912	0
Duox1	17.2042	4.67877	1.814	2.57926	0.00990123	0.0730187	2.03998	0.100869	3.46171	0	0	0.245307	2.65823	0.0572985
Cartpt	8750.93	4.60055	0.140012	32.8583	8.68362e-237	4.50622e-233	1045.13	43.8171	1020.14	41.5539	1009.72	34.8336	1105.52	55.0639
Olfr1033	151.313	4.57053	0.539799	8.4671	2.51588e-17	4.71894e-15	18.0086	0.820435	20.8409	0.309334	13.2481	0.776806	19.9367	1.37516
1700074H08Rik	10.6723	4.43239	2.08796	2.12284	0.0337677	0.165389	1.31441	0.0136282	0	0	0.671562	0.0408845	3.27167	0
Myod1	3.08572	4.29688	3.4349	1.25095	0.210954	NA	0.366794	0.0171852	0	0.0515557	0.793664	0	0.306719	0
Cyp2b19	32.9763	4.27895	1.3075	3.27261	0.00106558	0.0141063	3.97538	0.128125	7.3473	0	4.57883	0.327076	0	0.0572985
Mat1a	6.34783	4.22819	2.53151	1.67023	0.0948746	0.302673	0.772725	0.0171852	0.98906	0.0515557	0	0	1.32912	0
Prdm12	733.452	4.15594	0.259267	16.0296	7.94205e-58	8.83156e-55	86.4829	4.78617	112.612	4.94935	80.8926	3.9658	65.9446	5.44336
H2-Q8	6.69547	4.02655	2.11843	1.90072	0.0573384	0.227289	0.779699	0.05347	1.62488	0.103111	0.305255	0	0.408959	0.0572985
LOC433944	124.459	4.01555	0.52341	7.67189	1.69477e-14	2.37696e-12	14.5767	0.910689	12.5752	0.670224	18.6816	0.858575	12.4732	1.20327
Fcrla	1.76391	4.01344	3.97131	1.01061	0.312204	NA	0.219497	0	0.353236	0	0.305255	0	0	0
Erv3	5.21874	3.86275	2.57096	1.50245	0.13298	0.367063	0.618595	0.0308134	0	0.0515557	1.03787	0.0408845	0.817917	0
Nms	17.5547	3.8454	1.41809	2.71167	0.00669451	0.0556138	2.03395	0.15051	1.05971	0.206223	1.77048	0.245307	3.27167	0
4933413L06Rik	2.41005	3.79381	3.82859	0.990916	0.321727	NA	0.26553	0.0343705	0	0.103111	0.183153	0	0.613438	0
Atg7	2313.1	3.76887	0.160195	23.5268	2.17067e-122	4.82758e-119	268.191	19.6461	290.43	19.1787	255.987	20.8511	258.155	18.9085
BC055111	9.72181	3.75944	2.09748	1.79236	0.0730761	0.263483	1.08701	0.122754	0.635824	0	2.6252	0.081769	0	0.286493
Tnfrsf11b	141.561	3.58373	0.520749	6.88186	5.9074e-12	5.57372e-10	16.2507	1.36489	10.809	1.95912	14.5302	0.81769	23.4129	1.31787
D330045A20Rik	117.876	3.56946	0.511174	6.98288	2.89196e-12	2.83157e-10	13.5125	1.15572	11.8687	0.824891	16.9111	1.55361	11.7576	1.08867
Sox3	400.147	3.52958	0.348924	10.1156	4.71125e-24	1.38386e-21	46.0271	3.76624	69.2342	3.24801	38.5843	3.63872	30.2629	4.41199
Traf3ip3	40.7152	3.51204	1.0634	3.30264	0.000957785	0.0130112	4.42419	0.642324	6.78212	0.618668	2.50309	1.3083	3.98735	0
Prokr1	93.7859	3.37844	0.566046	5.96849	2.39464e-09	1.50322e-07	10.6698	1.00072	7.48859	0.670224	7.75348	0.899459	16.7673	1.43246
2010001M09Rik	8.02081	3.3145	2.26044	1.46631	0.142565	0.381836	0.902695	0.0953972	1.05971	0	1.64838	0.286192	0	0
Fam159b	56.9152	3.30657	0.722233	4.57826	4.68852e-06	0.000144251	6.42263	0.659767	10.9503	1.18578	5.25039	0.44973	3.06719	0.343791
Nr0b2	1.93203	3.29679	3.89136	0.847207	0.39688	NA	0.185905	0.0545127	0.353236	0	0	0.163538	0.204479	0
GFP	1853.86	3.27925	0.192961	16.9944	9.03398e-65	1.17201e-61	209.138	21.5522	249.596	22.9938	174.667	24.8169	203.15	16.8458
1700001K19Rik	77.0003	3.2593	0.667455	4.88318	1.04389e-06	3.75318e-05	8.82029	0.76145	3.95624	0.72178	6.04405	0.81769	16.4606	0.744881
Arid1b	9580.72	3.22186	0.120706	26.6919	5.8396e-157	2.27277e-153	1076.77	115.436	1018.66	114.608	1080.05	109.366	1131.59	122.332
Asb4	2777.75	3.22152	0.168755	19.0899	3.06305e-81	5.29839e-78	312.24	33.4172	359.523	35.7796	317.099	28.3739	260.098	36.0981
Syne1	33572.8	3.19122	0.154503	20.6548	8.8347e-95	1.71923e-91	3770.37	407.361	2869.47	422.808	4502.94	357.044	3938.68	442.23
Rfx8	6.93308	3.17236	2.44258	1.29877	0.194021	0.452784	0.824538	0.038199	0	0	0.122102	0	2.35151	0.114597
Npy5r	143.838	3.15187	0.471181	6.6893	2.24244e-11	1.96125e-09	16.0062	1.89273	14.9065	1.70134	15.6291	1.22654	17.483	2.75033
Atf3	93.6627	3.14306	0.580019	5.41889	5.99699e-08	2.79525e-06	10.5268	1.12835	15.9662	1.49511	10.1955	0.858575	5.4187	1.03137
Fpr2	27.7558	3.14227	1.25567	2.50247	0.0123329	0.0845808	3.25691	0.196966	2.61394	0.206223	0	0.0408845	7.15678	0.343791
Lct	19.1348	3.03977	1.43151	2.12347	0.0337143	0.165311	2.21444	0.166652	2.61394	0.36089	4.02937	0.081769	0	0.0572985
Yeats2	3084.82	3.0307	0.185436	16.3436	4.83093e-60	5.78522e-57	343.445	40.4226	414.557	44.3894	215.51	38.7176	400.268	38.1608
D14Ertd668e	33.5673	3.0226	0.915704	3.30085	0.00096392	0.0130376	3.74336	0.433674	2.61394	0.515557	2.68625	0.327076	5.9299	0.458388
Ddx60	46.3032	3.01134	0.803473	3.74791	0.000178318	0.00328916	5.19574	0.566127	4.87465	0.618668	8.9745	0.735921	1.73807	0.343791
Dync1h1	50611.6	3.00858	0.510481	5.89362	3.77834e-09	2.2916e-07	5664.88	633.119	2465.58	637.331	7889.51	590.372	6639.55	671.653
A4galt	29.6897	2.99839	0.971712	3.08567	0.00203092	0.0234916	3.29636	0.39816	5.29853	0.515557	2.13679	0.44973	2.45375	0.229194
Spna2	69781.8	2.99462	0.156935	19.082	3.56577e-81	5.5512e-78	7751.97	931.526	4970.8	853.04	10480.6	931.594	7804.47	1009.94
Oas1b	8.66269	2.97749	2.09931	1.41832	0.156098	0.402274	0.971026	0.10694	2.11941	0.206223	0.793664	0	0	0.114597
1810044D09Rik	14.277	2.96938	1.45241	2.04445	0.0409094	0.185543	1.57557	0.201023	3.17912	0.464001	1.34312	0.081769	0.204479	0.0572985
Clec14a	52.0008	2.94082	0.755186	3.89416	9.85382e-05	0.00202293	5.7556	0.715266	2.68459	0.567113	7.93664	1.063	6.64558	0.515687
Tbx3	1339.48	2.9378	0.193372	15.1925	3.96643e-52	4.11662e-49	147.306	19.3752	141.224	22.8392	151.834	16.7218	148.861	18.5647
7530416G11Rik	17.9932	2.88037	1.47784	1.94904	0.0512904	0.211857	2.07643	0.162596	0	0.103111	1.52628	0.0408845	4.70302	0.343791
Ttn	629.331	2.86267	0.248895	11.5015	1.29598e-30	4.69203e-28	69.0843	9.22833	56.659	8.86758	56.5333	8.79017	94.0605	10.0272
Pcdhb13	50.9131	2.84751	0.745705	3.81854	0.000134243	0.00257059	5.53604	0.799478	6.42889	0.876447	5.06724	0.490614	5.11198	1.03137
2210010C17Rik	2.7988	2.83021	3.27028	0.865432	0.386801	NA	0.277349	0.0709267	0.282588	0	0.549459	0.0408845	0	0.171896
Brs3	65.8865	2.81703	0.708328	3.97702	6.97854e-05	0.00151523	7.25814	0.940631	9.25477	0.670224	3.1136	1.063	9.40605	1.08867
Il25	15.7045	2.79689	1.57214	1.77903	0.0752352	0.267352	1.72887	0.225366	2.11941	0.103111	0	0	3.06719	0.572985
Pnliprp1	3.80538	2.79621	3.2044	0.872615	0.382873	0.645362	0.397135	0.0763981	1.13035	0	0.0610511	0	0	0.229194
Vmn1r71	8.99461	2.73147	2.67571	1.02084	0.30733	0.575961	1.11927	0	0	0	3.35781	0	0	0
Spag17	35.3781	2.6748	1.30313	2.0526	0.0401111	0.183579	3.89668	0.5057	0	0.928002	5.55565	0.245307	6.13438	0.343791
Cd28	12.2038	2.6468	2.20727	1.19913	0.230478	0.492514	1.49952	0.0190995	0	0	0	0	4.49855	0.0572985
Myh2	39.7979	2.63907	0.863484	3.0563	0.00224086	0.0252612	4.1661	0.786263	4.16818	0.412445	6.89877	1.71715	1.43136	0.229194
Prpf8	11661.8	2.621	0.179596	14.5938	3.07411e-48	2.08077e-45	1254.11	197.052	872.986	212.203	1688.24	181.445	1201.11	197.508
Ecm1	54.3295	2.60822	0.723985	3.60259	0.000315059	0.00534879	5.76034	1.0003	6.1463	1.34045	6.22721	1.14477	4.9075	0.515687
Gal	1017.34	2.60361	0.200336	12.9962	1.28509e-38	6.0625e-36	108.633	17.9621	112.046	16.2916	100.673	16.6809	113.179	20.914
Zbp1	3.95175	2.59496	2.81121	0.923077	0.355967	0.621097	0.445391	0.0463559	0.847765	0	0.488408	0.081769	0	0.0572985
Irf4	20.3424	2.59154	1.12423	2.30517	0.0211572	0.122042	2.16862	0.362747	2.89653	0.515557	2.07574	0.286192	1.5336	0.286493
Cd24a	788.642	2.54414	0.234872	10.832	2.4271e-27	8.03937e-25	83.8561	14.2807	72.1307	15.8276	100.917	13.2057	78.5201	13.8089
Fbxw20	6.21446	2.536	3.07993	0.823396	0.410283	0.669316	0.773313	0	0	0	2.31994	0	0	0
4930564G21Rik	3.46764	2.52207	3.22276	0.782582	0.433873	NA	0.397135	0.0343705	1.13035	0.103111	0.0610511	0	0	0
AI848285	45.9435	2.51609	0.781098	3.22122	0.00127646	0.0162353	4.86831	0.848791	4.30947	0.72178	6.41036	0.735921	3.88511	1.08867
Ubr3	11975.8	2.50584	0.186147	13.4616	2.63227e-41	1.36597e-38	1276.62	213.627	740.664	217.41	1522.06	201.438	1567.13	222.032
Eppk1	29.2685	2.50208	1.05492	2.37181	0.0177011	0.108663	3.20729	0.434817	0.49453	0.412445	2.68625	0.204423	6.4411	0.687582
Bcl3	53.5525	2.50087	0.814332	3.07107	0.00213293	0.0243772	5.78811	0.875833	6.42889	1.392	9.40186	0.490614	1.5336	0.744881
Ceacam10	4.73109	2.47416	3.42682	0.722	0.470294	0.717658	0.588726	0	1.76618	0	0	0	0	0
Cd300lf	110.24	2.47135	0.535914	4.61147	3.99829e-06	0.00012474	11.8793	1.83878	3.10847	0.72178	9.21871	2.04423	23.3106	2.75033
Cxcl9	8.30769	2.46939	2.01727	1.22413	0.220904	0.48223	0.918693	0.115097	0	0.206223	0.915766	0.081769	1.84031	0.0572985
Rhox7	4.54184	2.46006	3.48471	0.705959	0.480214	0.725259	0.565177	0	1.69553	0	0	0	0	0
Timp1	34.3951	2.45235	1.05702	2.32005	0.020338	0.11863	3.76739	0.512657	4.16818	0.515557	0.488408	0.735921	6.64558	0.286493
BC096441	11.3918	2.45107	1.53693	1.59479	0.11076	0.330737	1.25255	0.16501	1.05971	0.257778	0.244204	0.122654	2.45375	0.114597
Plec	13508.7	2.43792	0.168826	14.4405	2.87785e-47	1.86677e-44	1427.38	253.612	924.629	248.962	1840.38	241.423	1517.13	270.449
Gsg1	9.13118	2.43573	1.95432	1.24634	0.212641	0.473591	1.01898	0.117283	0	0	2.13679	0.122654	0.920157	0.229194
Olfr889	4.16336	2.43171	3.6123	0.673174	0.500837	0.739365	0.518079	0	1.55424	0	0	0	0	0
Krt23	9.4651	2.4269	2.40897	1.00744	0.313722	0.5812	1.15872	0.0190995	0	0	0	0	3.47615	0.0572985
AI182371	50.8723	2.42139	0.797249	3.03718	0.00238804	0.026612	5.56231	0.768122	9.81995	1.13423	0.732613	0.367961	6.13438	0.80218
Usp9y	7.32936	2.41829	2.64065	0.915796	0.359774	0.624858	0.894863	0.0171852	2.68459	0.0515557	0	0	0	0
9130404H23Rik	3.78487	2.40317	3.75858	0.639383	0.522574	0.75446	0.470981	0	1.41294	0	0	0	0	0
Pon3	24.332	2.39764	1.13432	2.11372	0.0345391	0.16798	2.5652	0.462616	0.565177	0.103111	5.49459	0.367961	1.63583	0.916777
Gpx6	4.59948	2.39459	2.46048	0.97322	0.330444	0.596862	0.522436	0.0499129	1.201	0.0515557	0.366306	0.0408845	0	0.0572985
4930592A05Rik	4.252	2.39135	3.58622	0.666815	0.504891	0.742012	0.529109	0	0	0	1.58733	0	0	0
5730412P04Rik	4.252	2.39135	3.58622	0.666815	0.504891	0.742012	0.529109	0	0	0	1.58733	0	0	0
Flt1	120.178	2.3855	0.56348	4.23352	2.30067e-05	0.000578623	12.5599	2.39479	7.3473	3.6089	11.1113	1.51273	19.2211	2.06275
Vmn2r113	6.02516	2.3803	3.11026	0.765308	0.444088	0.697706	0.749758	0	0	0	0	0	2.24927	0
Apoc4	4.08846	2.37898	3.64473	0.652718	0.513938	0.748106	0.508759	0	0	0	1.52628	0	0	0
Gast	8.58735	2.36748	1.92512	1.22978	0.218778	0.480434	0.977793	0.0907974	0	0.0515557	2.31994	0.163538	0.613438	0.0572985
Tead4	2.95697	2.36741	3.1968	0.740556	0.458963	NA	0.319961	0.0479986	0	0.103111	0.244204	0.0408845	0.715678	0
Cd27	5.17471	2.36394	2.26843	1.04211	0.297363	0.564485	0.481605	0.162324	0.423883	0.257778	0.305255	0	0.715678	0.229194
Procr	13.8389	2.36321	1.34975	1.75084	0.0799731	0.275644	1.42895	0.293135	1.69553	0.257778	1.15997	0.44973	1.43136	0.171896
4930500J02Rik	14.8151	2.36264	1.54464	1.52957	0.126122	0.356282	1.65179	0.191766	0	0.0515557	2.80835	0.122654	2.14703	0.40109
2310008N11Rik	3.0279	2.36188	3.9721	0.594617	0.552099	NA	0.376785	0	1.13035	0	0	0	0	0
Mgam	2.83865	2.35734	3.97341	0.59328	0.552994	NA	0.353236	0	1.05971	0	0	0	0	0
Snord66	4.55987	2.35637	2.60353	0.905068	0.365429	0.629941	0.496493	0.0709267	0	0	0.671562	0.0408845	0.817917	0.171896
Fam26d	3.76138	2.35414	3.77298	0.623945	0.532663	0.761759	0.468058	0	0	0	1.40417	0	0	0
Spnb2	35728.2	2.32906	0.153608	15.1624	6.27674e-52	6.10727e-49	3726.2	719.74	2566.19	695.228	4733.84	693.728	3878.56	770.264
4930565D16Rik	3.43431	2.32902	3.91998	0.594141	0.552418	NA	0.427357	0	0	0	1.28207	0	0	0
Helt	3.43431	2.32902	3.91998	0.594141	0.552418	NA	0.427357	0	0	0	1.28207	0	0	0
1700001D01Rik	1.89244	2.32302	3.98347	0.583165	0.559782	NA	0.23549	0	0.706471	0	0	0	0	0
Socs3	148.066	2.32029	0.456994	5.07728	3.82867e-07	1.50138e-05	15.3769	3.04809	18.4389	2.6809	15.9343	3.02545	11.7576	3.43791
Sell	5.20355	2.32015	3.29855	0.703386	0.481815	0.726761	0.647518	0	0	0	0	0	1.94255	0
Npy1r	435.529	2.3142	0.286437	8.07925	6.51679e-16	1.11487e-13	45.145	9.05116	48.6052	8.86758	49.5124	8.25867	37.3175	10.0272
Plagl1	4147.35	2.31381	0.13435	17.2223	1.80777e-66	2.55848e-63	429.946	86.1408	459.489	91.8207	358.003	75.8408	472.347	90.7609
D930028M14Rik	55.8573	2.31288	0.725924	3.18612	0.00144197	0.0178633	5.79109	1.15967	5.22789	1.75289	8.66925	0.981228	3.47615	0.744881
4930521A18Rik	2.78015	2.31177	3.96918	0.582431	0.560277	NA	0.345956	0	0	0	1.03787	0	0	0
Gata4	2.78015	2.31177	3.96918	0.582431	0.560277	NA	0.345956	0	0	0	1.03787	0	0	0
Aadac	2.61661	2.30812	3.97025	0.581354	0.561002	NA	0.325606	0	0	0	0.976817	0	0	0
Tspan8	17.7462	2.30633	1.91235	1.20602	0.227811	0.489046	2.17749	0.0308134	0	0.0515557	6.53246	0.0408845	0	0
Hotair	2.45308	2.30403	3.97145	0.580148	0.561815	NA	0.305255	0	0	0	0.915766	0	0	0
Olfr402	2.45308	2.30403	3.97145	0.580148	0.561815	NA	0.305255	0	0	0	0.915766	0	0	0
Crlf1	8.46324	2.30223	2.03598	1.13077	0.258151	0.522798	0.858796	0.194351	0.98906	0.0515557	1.58733	0.531499	0	0
Igfn1	12.1114	2.29997	1.6979	1.3546	0.175546	0.429904	1.3664	0.14071	0	0.103111	2.25889	0.204423	1.84031	0.114597
H1fnt	2.28954	2.29941	3.97281	0.578786	0.562734	NA	0.284905	0	0	0	0.854715	0	0	0
Olfr282	2.28954	2.29941	3.97281	0.578786	0.562734	NA	0.284905	0	0	0	0.854715	0	0	0
Olfr918	2.28954	2.29941	3.97281	0.578786	0.562734	NA	0.284905	0	0	0	0.854715	0	0	0
1700013D24Rik	2.126	2.29415	3.97437	0.577237	0.563779	NA	0.264555	0	0	0	0.793664	0	0	0
Cd207	2.126	2.29415	3.97437	0.577237	0.563779	NA	0.264555	0	0	0	0.793664	0	0	0
Il24	2.126	2.29415	3.97437	0.577237	0.563779	NA	0.264555	0	0	0	0.793664	0	0	0
Olfr1036	2.126	2.29415	3.97437	0.577237	0.563779	NA	0.264555	0	0	0	0.793664	0	0	0
Pinc	2.126	2.29415	3.97437	0.577237	0.563779	NA	0.264555	0	0	0	0.793664	0	0	0
Aldoart2	2.22008	2.28837	3.55898	0.642985	0.520234	NA	0.243534	0.0327277	0.423883	0	0	0.0408845	0.306719	0.0572985
Olfr651	1.96246	2.28812	3.97617	0.575458	0.564981	NA	0.244204	0	0	0	0.732613	0	0	0
Olfr890	1.96246	2.28812	3.97617	0.575458	0.564981	NA	0.244204	0	0	0	0.732613	0	0	0
AA619741	7.7418	2.28651	2.56001	0.893163	0.37177	0.636229	0.936116	0.0272563	0	0	2.80835	0.081769	0	0
Mapk8ip2	6078.27	2.28402	0.153898	14.8411	7.94467e-50	5.88965e-47	629.722	126.644	500.182	124.301	810.819	126.538	578.165	129.094
4930453H23Rik	1.79892	2.28112	3.97827	0.573396	0.566377	NA	0.223854	0	0	0	0.671562	0	0	0
4930556G01Rik	1.79892	2.28112	3.97827	0.573396	0.566377	NA	0.223854	0	0	0	0.671562	0	0	0
Muc5ac	1.79892	2.28112	3.97827	0.573396	0.566377	NA	0.223854	0	0	0	0.671562	0	0	0
Tpte	1.79892	2.28112	3.97827	0.573396	0.566377	NA	0.223854	0	0	0	0.671562	0	0	0
Serpina3n	884.2	2.27838	0.291634	7.81249	5.60694e-15	8.31322e-13	91.4623	18.5656	119.535	12.6311	59.769	21.7506	95.0829	21.3151
Ank2	16536.1	2.275	0.152099	14.9573	1.39514e-50	1.08598e-47	1713.49	344.22	1218.87	335.215	2198.14	342.367	1723.45	355.079
LOC629206	1.63538	2.27291	3.98075	0.570974	0.568018	NA	0.203504	0	0	0	0.610511	0	0	0
Olfr987	1.63538	2.27291	3.98075	0.570974	0.568018	NA	0.203504	0	0	0	0.610511	0	0	0
Gem	146.942	2.27283	0.530441	4.28479	1.82912e-05	0.000468352	15.2179	3.06719	11.3742	4.38223	23.7489	1.8398	10.5307	2.97952
Myh9	3759.29	2.26794	0.449478	5.04572	4.51825e-07	1.74109e-05	391.914	75.8834	205.371	81.1487	530.228	72.5291	440.142	73.9724
1810013A23Rik	4.38194	2.25906	3.53859	0.638409	0.523208	0.754704	0.545278	0	0	0	0	0	1.63583	0
G630008E18	4.38194	2.25906	3.53859	0.638409	0.523208	0.754704	0.545278	0	0	0	0	0	1.63583	0
Pdyn	241.396	2.258	0.396182	5.6994	1.20232e-08	6.3883e-07	25.1253	4.91349	31.2967	4.74312	31.1971	5.06968	12.8822	4.92767
Cxcr5	10.1491	2.25648	1.8403	1.22615	0.220143	0.481839	1.07509	0.187837	1.27165	0.154667	1.95363	0.408845	0	0
LOC622124	3.09583	2.25114	2.84909	0.790126	0.429454	NA	0.295212	0.0900262	0.0706471	0	0.610511	0.0408845	0.204479	0.229194
Apol10a	4.10806	2.23848	3.63445	0.615908	0.537956	0.764621	0.511198	0	0	0	0	0	1.5336	0
Lilra6	3.83419	2.21783	3.74025	0.592963	0.553206	0.775604	0.477118	0	0	0	0	0	1.43136	0
B3gnt7	61.2929	2.21329	0.829554	2.66805	0.00762933	0.0611604	6.56282	1.06433	10.5264	0.567113	8.24189	1.5945	0.920157	1.03137
Gprasp1	47343.9	2.20931	0.169644	13.0232	9.03372e-39	4.3949e-36	4888.39	1002.98	2872.72	935.787	6479.65	973.419	5312.78	1099.73
Agxt2	3.56032	2.19698	3.85866	0.569364	0.569109	NA	0.443039	0	0	0	0	0	1.32912	0
Tmem176a	122.788	2.19472	0.491569	4.46472	8.01741e-06	0.000229018	12.5001	2.7793	13.7055	2.06223	9.89027	2.49396	13.9046	3.7817
Pdcd1	3.28645	2.17827	3.97203	0.548402	0.583416	NA	0.408959	0	0	0	0	0	1.22688	0
Snord61	3.28645	2.17827	3.97203	0.548402	0.583416	NA	0.408959	0	0	0	0	0	1.22688	0
Hnf4a	3.01258	2.17259	3.97382	0.546724	0.584568	NA	0.374879	0	0	0	0	0	1.12464	0
Gdf2	2.73871	2.16589	3.97595	0.544747	0.585928	NA	0.340799	0	0	0	0	0	1.0224	0
Gimap7	2.73871	2.16589	3.97595	0.544747	0.585928	NA	0.340799	0	0	0	0	0	1.0224	0
Gtse1	2.73871	2.16589	3.97595	0.544747	0.585928	NA	0.340799	0	0	0	0	0	1.0224	0
Tmem217	2.73871	2.16589	3.97595	0.544747	0.585928	NA	0.340799	0	0	0	0	0	1.0224	0
Dtl	12.5373	2.15756	1.44698	1.49108	0.135941	0.372135	1.34223	0.21788	0.565177	0.154667	3.05255	0.327076	0.408959	0.171896
Dst	37023.2	2.15702	0.163168	13.2196	6.75984e-40	3.39475e-37	3786.41	820.676	2538.28	807.104	4900.87	766.912	3920.07	888.013
Xkrx	36.9736	2.15495	0.868859	2.4802	0.0131308	0.0882105	3.72163	0.87929	4.59206	1.44356	2.38099	0.735921	4.19183	0.458388
Lrguk	111.808	2.14907	0.587222	3.65972	0.00025249	0.00443152	11.6896	2.22352	3.53236	2.26845	11.5997	1.5945	19.9367	2.80763
Pon2	253.362	2.14709	0.373319	5.75136	8.85269e-09	4.95117e-07	25.9433	5.58456	27.7643	4.74312	15.2017	5.47852	34.8637	6.53203
9130008F23Rik	10.6047	2.14285	1.63421	1.31124	0.189777	0.44703	1.10548	0.214151	2.68459	0.257778	0.427357	0.0408845	0.204479	0.343791
Dsp	95.6653	2.11109	0.596193	3.54095	0.000398695	0.00650617	9.7845	2.11987	4.59206	2.26845	13.0039	1.51273	11.7576	2.57843
Gpr133	17.5772	2.09274	1.25839	1.66303	0.0963068	0.305352	1.75825	0.429017	0.353236	0.0515557	1.34312	0.490614	3.57839	0.744881
Irs4	4477.35	2.08663	0.140833	14.8164	1.14831e-49	8.12587e-47	450.714	106.437	477.928	112.031	451.35	93.2576	422.863	114.024
Myh3	26.5767	2.07704	1.39347	1.49055	0.13608	0.372332	2.92279	0.384361	0	0.670224	0.793664	0.081769	7.97469	0.40109
Slc1a6	561.405	2.07604	0.301857	6.87757	6.0882e-12	5.70971e-10	57.0707	12.7894	51.5017	13.1467	36.6917	13.819	83.0186	11.4024
Tnks1bp1	3350.61	2.06951	0.176999	11.6922	1.39793e-31	5.44075e-29	338.023	78.9195	268.954	81.3033	436.454	73.633	308.662	81.8223
Hectd1	7256.97	2.05678	0.176763	11.6358	2.7104e-31	1.02916e-28	734.066	168.975	477.221	170.443	996.109	169.916	728.867	166.567
Ppm1j	26.0571	2.05648	1.02871	1.99909	0.0455991	0.198126	2.62628	0.616211	3.7443	0.515557	3.41886	1.10388	0.715678	0.229194
Cxcl10	9.4982	2.05539	2.35338	0.873378	0.382457	0.64529	1.12464	0.0572985	0	0	0	0	3.37391	0.171896
Slpi	7.84616	2.05266	2.21715	0.925808	0.354546	0.619844	0.754151	0.222208	1.3423	0.257778	0	0.408845	0.920157	0
Mab21l3	28.1362	2.04596	0.997712	2.05065	0.0403011	0.184045	2.77184	0.729366	3.32041	0.412445	3.05255	0.572383	1.94255	1.20327
Tnrc18	7712.84	2.03865	0.134862	15.1166	1.25936e-51	1.15328e-48	773.419	186.35	932.33	190.24	677.667	184.021	710.259	184.788
1700042O10Rik	3.70736	2.03645	3.44829	0.590569	0.554809	0.776594	0.447708	0.0136282	0	0	1.34312	0.0408845	0	0
F5	23.3009	2.03544	1.17366	1.73427	0.0828707	0.280952	2.49282	0.406689	0.282588	0.36089	4.63988	0.286192	2.55599	0.572985
Cited1	469.606	2.03365	0.263375	7.72151	1.14961e-14	1.64193e-12	46.9947	11.442	59.8381	14.6418	36.5696	9.7714	44.5765	9.91265
Npy2r	357.567	2.03083	0.322611	6.29498	3.07436e-10	2.25762e-08	35.8716	8.62317	25.7155	9.58936	41.5147	8.54486	40.3847	7.7353
Snhg9	3.22987	2.0297	3.07456	0.66016	0.509151	NA	0.309206	0.0927117	0.211941	0	0	0.163538	0.715678	0.114597
Cd44	317.71	2.01552	0.324412	6.21282	5.2041e-10	3.63307e-08	31.851	7.68412	36.9484	9.17691	21.1847	6.82771	37.4197	7.04772
Ppp1r9a	14854.7	2.01408	0.146806	13.7193	7.77925e-43	4.65797e-40	1486.09	362.403	1145.47	359.652	1790.75	339.014	1522.04	388.541
Pi16	148.852	2.00902	0.438926	4.57712	4.71424e-06	0.000144756	14.8173	3.70554	13.423	3.71201	15.0796	3.10722	15.9494	4.29739
Supt6h	12453.9	2.0056	0.162685	12.3282	6.38957e-35	2.84208e-32	1248.07	301.665	874.753	300.724	1612.72	287.868	1256.73	316.403
1700003F12Rik	23.8726	1.98441	1.09606	1.8105	0.0702188	0.257088	2.43585	0.534814	2.68459	0.36089	3.90727	0.613268	0.715678	0.630284
Chia	27.3846	1.97694	0.972799	2.03222	0.0421318	0.188805	2.69209	0.715594	2.89653	0.928002	2.93045	0.81769	2.24927	0.40109
Six6	345.043	1.97663	0.300926	6.56849	5.0828e-11	4.14288e-09	34.335	8.60139	34.829	9.38313	25.0309	6.90948	43.1451	9.51156
Peg10	12565.2	1.97051	0.130498	15.1	1.62025e-51	1.40134e-48	1246.51	317.077	1172.6	326.451	1406.62	298.866	1160.32	325.914
Fry	7702.52	1.95863	0.38311	5.11244	3.18023e-07	1.27603e-05	771.504	186.98	440.485	189.776	1050.08	177.725	823.95	193.44
Tbx19	15.0471	1.95638	1.3463	1.45315	0.146183	0.387631	1.52555	0.346876	1.69553	0.206223	0.427357	0.490614	2.45375	0.343791
H2-K2	11.9787	1.95086	1.70944	1.14123	0.253776	0.517959	1.28384	0.206766	1.83682	0.309334	2.01468	0.081769	0	0.229194
Shroom3	458.821	1.94888	0.313891	6.20877	5.34024e-10	3.71147e-08	45.8405	11.2541	25.7862	11.3938	58.0596	10.2211	53.6758	12.1473
Gfra3	3.31321	1.94795	3.28046	0.593804	0.552643	NA	0.316892	0.0953972	0.706471	0	0.244204	0.286192	0	0
Abcc9	43.2773	1.94319	0.796712	2.43901	0.0147275	0.095572	4.3002	1.08513	2.68459	1.18578	5.92195	1.26742	4.29407	0.80218
Fer1l4	3.05321	1.94073	3.73372	0.519784	0.603214	NA	0.366306	0.0136282	0	0	1.09892	0.0408845	0	0
Snrnp200	5850.05	1.9403	0.176113	11.0173	3.15255e-28	1.09064e-25	581.399	146.568	389.548	150.233	738.962	142.442	615.687	147.028
Ctsz	349.728	1.93852	0.362985	5.3405	9.26907e-08	4.19479e-06	35.1022	8.41715	51.0779	7.06313	16.9111	7.6454	37.3175	10.5429
Foxp3	18.3837	1.93375	1.49193	1.29614	0.194927	0.453876	2.02521	0.262422	0	0.206223	3.72411	0.122654	2.35151	0.458388
Ifltd1	60.4669	1.92901	0.678973	2.84106	0.00449635	0.0418906	5.97925	1.54511	7.41795	1.80445	6.53246	1.22654	3.98735	1.60436
Prss45	12.3155	1.92644	1.42328	1.35352	0.175889	0.430042	1.20901	0.323505	1.62488	0.618668	0.366306	0.122654	1.63583	0.229194
Maff	65.359	1.92176	0.643333	2.98719	0.00281553	0.0299958	6.42398	1.70915	7.27665	2.01067	5.8609	1.79892	6.13438	1.31787
Ubr4	17215.1	1.91471	0.357389	5.35749	8.43845e-08	3.86382e-06	1707.14	435.067	1078.71	462.867	2210.17	398.788	1832.54	443.548
2310007L24Rik	3.99046	1.90834	3.05077	0.625529	0.531624	0.761111	0.387539	0.109025	0.918412	0	0.244204	0.327076	0	0
Depdc1b	29.3173	1.90028	1.11421	1.70549	0.0881027	0.290159	3.09279	0.555385	1.76618	0.618668	6.89877	0.245307	0.613438	0.80218
Kalrn	5808.34	1.89977	0.139262	13.6417	2.26233e-42	1.30444e-39	569.773	153.004	575.068	168.742	609.045	136.309	525.205	153.961
Gpx3	6062.85	1.89336	0.140581	13.4681	2.40993e-41	1.29372e-38	594.358	160.089	694.744	170.701	552.085	134.06	536.247	175.505
Sf3b1	5535.99	1.88448	0.180222	10.4564	1.36934e-25	4.26357e-23	548.332	140.554	307.315	125.796	695.31	138.067	642.372	157.8
Rnf128	409.805	1.8838	0.293502	6.41835	1.37757e-10	1.06169e-08	40.2143	10.7809	33.628	12.1671	36.5085	9.40344	50.5064	10.7721
Gse1	3990.05	1.87512	0.137518	13.6355	2.46275e-42	1.36929e-39	390.154	106.359	405.444	115.536	409.225	101.434	355.794	102.106
1700065J18Rik	9.89913	1.87402	1.82248	1.02828	0.303818	0.571714	1.06923	0.162596	0	0.103111	0.549459	0.0408845	2.65823	0.343791
Neb	78.4387	1.86409	0.758055	2.45905	0.0139306	0.0918558	7.63707	2.12367	2.33135	3.71201	10.8671	1.22654	9.71277	1.43246
Gimap5	2.78751	1.86239	3.87586	0.480512	0.630864	NA	0.329687	0.0171852	0.98906	0.0515557	0	0	0	0
Adprhl1	13.6734	1.85772	1.86075	0.998375	0.318098	0.585065	1.56461	0.136882	0.706471	0.206223	0	0.204423	3.98735	0
Tmem176b	593.126	1.85677	0.23686	7.8391	4.53788e-15	6.85881e-13	57.8379	15.9693	56.5883	15.8792	58.8532	16.5582	58.0721	15.4706
Myo3b	133.795	1.85256	0.462644	4.0043	6.22023e-05	0.00137162	13.0057	3.64349	17.9444	4.94935	10.4397	2.3713	10.6329	3.60981
Liph	22.2456	1.84866	1.09585	1.68697	0.0916097	0.297059	2.22003	0.54817	2.47265	0.515557	0.915766	0.613268	3.27167	0.515687
Papln	30.533	1.84497	0.937468	1.96803	0.0490645	0.206553	2.97628	0.823177	3.03783	0.824891	3.84622	0.613268	2.04479	1.03137
Stab1	36.1221	1.84435	0.943636	1.95451	0.050641	0.210347	3.71704	0.777921	7.91248	1.23734	2.6252	0.408845	0.613438	0.687582
Bhmt	3.98042	1.84315	3.32474	0.554374	0.579323	0.792243	0.468058	0.0272563	0	0	1.40417	0.081769	0	0
Mlph	134.45	1.84213	0.472103	3.90196	9.54157e-05	0.00197531	13.075	3.65569	10.3145	4.17601	13.3702	2.78015	15.5404	4.0109
AW549542	21.4632	1.83841	1.11666	1.64635	0.0996912	0.311833	2.09887	0.57197	2.11941	0.464001	3.05255	0.44973	1.12464	0.80218
Tmem8c	34.5438	1.83833	1.26824	1.44951	0.147195	0.389253	3.67026	0.628297	3.95624	0.412445	0	0.899459	7.05454	0.572985
Msn	589.994	1.83456	0.244506	7.50316	6.22987e-14	8.01542e-12	57.2754	16.1422	56.447	15.9823	57.2048	18.5207	58.1744	13.9235
Fasn	11669.3	1.83325	0.39825	4.60326	4.15929e-06	0.000129504	1147.68	304.418	682.663	330.678	1625.12	299.806	1135.27	282.768
Dpcr1	23.3787	1.83095	1.16446	1.57236	0.115868	0.340217	2.39671	0.512486	0.353236	0.670224	2.7473	0.408845	4.08959	0.458388
Vgf	2967.69	1.8245	0.147004	12.4112	2.27155e-35	1.0401e-32	288.324	80.9686	309.646	88.7273	238.588	73.6739	316.739	80.5044
Pdcl2	3.81688	1.8185	3.38242	0.537633	0.59083	0.799113	0.447708	0.0272563	0	0	1.34312	0.081769	0	0
Alx3	22.3028	1.81607	1.36885	1.32671	0.184605	0.441187	2.44529	0.330019	5.08659	0.515557	0	0.245307	2.24927	0.229194
Rrad	361.437	1.81597	0.294213	6.17228	6.73118e-10	4.5961e-08	35.2226	9.7538	52.4908	13.2498	23.0162	7.07302	30.1607	8.93857
1700120C14Rik	2.23552	1.813	3.96674	0.45705	0.647635	NA	0.264555	0.0136282	0	0	0.793664	0.0408845	0	0
I730030J21Rik	12.4543	1.81124	1.63861	1.10535	0.269006	0.536153	1.33086	0.218922	0	0.0515557	3.17465	0.490614	0.817917	0.114597
Gprasp2	12145.3	1.81113	0.153087	11.8307	2.70804e-32	1.10944e-29	1185.17	326.166	774.999	300.724	1495.14	336.561	1285.36	341.213
Spnb3	8305.89	1.79994	0.162234	11.0947	1.33162e-28	4.7115e-26	806.913	226.653	589.126	234.681	999.894	216.197	831.72	229.08
5330437I02Rik	67.9106	1.79113	1.02327	1.7504	0.0800495	0.275747	7.09237	1.35828	0.0706471	2.06223	8.11979	0.981228	13.0867	1.03137
Nr5a2	104.046	1.78529	0.52273	3.41532	0.000637078	0.00933023	10.1144	2.83285	14.1294	3.04179	8.8524	2.82103	7.36126	2.63573
Apbb1ip	132.531	1.78493	0.463053	3.8547	0.000115873	0.0023068	12.8212	3.6707	15.825	3.76357	12.2102	3.63872	10.4284	3.60981
Ankrd7	2.07198	1.78457	3.96765	0.449781	0.652868	NA	0.244204	0.0136282	0	0	0.732613	0.0408845	0	0
Fam115c	34.3231	1.78398	0.898608	1.98527	0.0471142	0.202075	3.41834	0.852747	4.45077	0.979558	4.88408	1.063	0.920157	0.515687
Eif4g1	10104	1.7815	0.14667	12.1463	5.9991e-34	2.59428e-31	978.652	278.666	731.339	270.152	1223.22	280.672	981.399	285.175
Ank3	8517.59	1.77276	0.168605	10.5143	7.42523e-26	2.3591e-23	826.545	233.365	561.998	227.618	1098.49	225.519	819.144	246.957
Actn2	318.38	1.76742	0.347401	5.08755	3.6272e-07	1.42596e-05	30.7405	8.87798	22.7484	9.28002	40.2326	7.15479	29.2405	10.1991
Peg3	58232.8	1.7647	0.145469	12.1311	7.22573e-34	3.04027e-31	5627.27	1619.08	4003.22	1608.28	6463.47	1563.3	6415.13	1685.67
Aox4	25.9666	1.7632	1.0289	1.71367	0.0865891	0.287546	2.44619	0.785035	3.03783	1.34045	2.8694	0.327076	1.43136	0.687582
AA536875	6.30925	1.76031	2.03971	0.863018	0.388128	0.649717	0.653427	0.131682	0.141294	0.0515557	0.183153	0.286192	1.63583	0.0572985
Ribc1	20.9518	1.75434	1.12985	1.55272	0.120491	0.347565	2.09963	0.507557	0.777118	0.36089	4.09042	0.531499	1.43136	0.630284
Tro	7960.6	1.75406	0.151348	11.5896	4.65476e-31	1.72536e-28	768.439	222.16	539.885	207.769	947.207	221.553	818.224	237.159
Myh14	3031.92	1.75187	0.2162	8.10298	5.36303e-16	9.27685e-14	295.497	81.789	159.168	82.1282	411.606	82.2188	315.716	81.0201
Bahcc1	2436.31	1.74564	0.179539	9.72291	2.40797e-22	6.46332e-20	235.07	68.0987	319.396	71.4046	182.665	70.3214	203.15	62.57
Jak3	87.7973	1.74356	0.582267	2.99444	0.0027495	0.0294592	8.56641	2.35889	12.0807	2.73245	4.21252	2.16688	9.40605	2.17734
Tmem40	3.98307	1.74149	2.72299	0.639549	0.522466	0.75446	0.40589	0.0897547	0.706471	0.154667	0	0	0.511198	0.114597
Mical1	269.138	1.73641	0.363679	4.77457	1.80095e-06	6.10831e-05	26.0264	7.46455	16.3901	5.82579	38.8895	7.4001	22.7994	9.16777
Ranbp2	4458.74	1.73633	0.178936	9.70363	2.90967e-22	7.54962e-20	431.479	123.356	259.769	111.824	575.406	123.88	459.261	134.365
Dnahc5	237.33	1.73584	0.436802	3.97397	7.06858e-05	0.00153051	23.2993	6.23357	9.53736	6.80535	34.4938	6.05091	25.8666	5.84445
Capn11	10.4249	1.73469	1.59205	1.0896	0.275891	0.542786	0.985731	0.31152	2.11941	0.72178	0.122102	0.0408845	0.715678	0.171896
Lrpprc	3038.65	1.72694	0.177937	9.70533	2.8615e-22	7.54962e-20	292.446	85.6763	194.562	81.922	353.974	83.2	328.803	91.9069
Cd300lg	18.8198	1.72292	1.16762	1.47559	0.140055	0.377161	1.85814	0.483758	0.847765	0.412445	3.60201	0.695037	1.12464	0.343791
6030429G01Rik	37.2024	1.72197	0.839099	2.05217	0.0401532	0.183638	3.53426	1.09513	4.23883	1.28889	3.29676	0.735921	3.06719	1.26057
Lhx3	14.5127	1.71982	1.58504	1.08503	0.277908	0.544965	1.51817	0.287764	2.96718	0.257778	1.58733	0.204423	0	0.40109
4930526D03Rik	1.7449	1.71679	3.96987	0.432456	0.66541	NA	0.203504	0.0136282	0	0	0.610511	0.0408845	0	0
4931409K22Rik	1.7449	1.71679	3.96987	0.432456	0.66541	NA	0.203504	0.0136282	0	0	0.610511	0.0408845	0	0
4732456N10Rik	125.016	1.7165	0.524932	3.26995	0.00107567	0.0141555	11.9995	3.55716	16.814	2.99023	7.63138	4.70172	11.5531	2.97952
Ncor2	12264.2	1.71545	0.146504	11.7092	1.14298e-31	4.56256e-29	1174.18	351.954	894.11	360.89	1377.62	352.384	1250.8	342.588
Svil	386.079	1.71032	0.317765	5.38235	7.35193e-08	3.38624e-06	37.0462	10.9966	40.834	11.4969	45.9714	9.97582	24.333	11.517
4931408D14Rik	18.0423	1.70992	1.50601	1.1354	0.256209	0.520645	1.90506	0.34009	0	0.464001	2.13679	0.327076	3.57839	0.229194
4922501L14Rik	871.702	1.70675	0.231821	7.36238	1.80654e-13	2.1634e-11	83.7478	24.7248	52.9147	22.8907	84.4336	21.8323	113.895	29.4514
Hk3	34.0132	1.6974	1.23879	1.3702	0.170625	0.424056	3.63253	0.599998	5.58112	0.515557	0	0.654152	5.31646	0.630284
Ttc36	14.3689	1.69374	1.57099	1.07813	0.280974	0.548696	1.52484	0.263193	1.76618	0.257778	2.80835	0.245307	0	0.286493
Tnfsf13	5.83003	1.69041	2.31777	0.729327	0.465802	0.714092	0.564295	0.161181	0.777118	0.36089	0.915766	0.122654	0	0
Olfr55	4.111	1.69011	2.54409	0.664325	0.506482	0.742902	0.442551	0.0690124	0	0.0515557	0.305255	0.0408845	1.0224	0.114597
Elf3	3.52804	1.68722	2.98144	0.565907	0.571457	NA	0.363766	0.075255	0.98906	0.103111	0	0.122654	0.10224	0
C1qtnf2	27.4804	1.68593	1.03127	1.63481	0.102088	0.315841	2.48338	0.936216	2.61394	1.59823	2.07574	0.981228	2.76047	0.229194
Rspo4	20.0439	1.67685	1.52556	1.09917	0.271694	0.539434	2.06967	0.424545	2.11941	0.464001	0	0.695037	4.08959	0.114597
Cytip	17.1813	1.67657	1.31438	1.27556	0.202111	0.462431	1.78593	0.352076	0.211941	0.36089	1.46523	0.408845	3.68063	0.286493
Ddx58	147.156	1.67187	0.462268	3.61667	0.00029842	0.00510527	14.0333	4.27847	10.809	5.10401	11.6608	3.72049	19.63	4.0109
Mprip	9966.63	1.67169	0.155461	10.7531	5.72835e-27	1.85789e-24	949.604	290.62	718.552	282.525	1241.9	283.82	888.361	305.516
Wdr38	2.87228	1.66656	3.25346	0.512242	0.608481	NA	0.256552	0.100869	0.565177	0	0	0.245307	0.204479	0.0572985
Cbx2	93.4125	1.66546	0.542506	3.06994	0.00214099	0.0244221	8.82979	2.79425	9.25477	2.83556	9.15766	2.45307	8.07693	3.09412
Il21r	13.3463	1.66483	1.3998	1.18934	0.234308	0.496624	1.31774	0.343047	0.847765	0.309334	0.549459	0.490614	2.55599	0.229194
Gpc4	233.586	1.66435	0.354124	4.6999	2.60283e-06	8.53071e-05	22.1415	6.92532	20.4877	6.39291	19.0479	6.70506	26.889	7.678
4932412D23Rik	5.53647	1.65966	2.28564	0.726124	0.467763	0.71567	0.577406	0.11154	0	0.154667	1.22102	0.122654	0.511198	0.0572985
Six3	1256.63	1.65629	0.196782	8.41688	3.8665e-17	7.0816e-15	119.115	37.2573	148.712	37.0685	105.985	36.7143	102.649	37.9889
Vmn2r120	3.67802	1.65417	3.20529	0.516076	0.605802	0.809191	0.400386	0.0572985	0	0	1.09892	0	0.10224	0.171896
Pcdha1	21.4719	1.64841	1.0831	1.52194	0.128024	0.359342	2.00542	0.666496	1.97812	0.412445	2.19784	0.899459	1.84031	0.687582
Itgb7	16.4466	1.64097	1.42988	1.14762	0.251124	0.515127	1.68853	0.358047	2.68459	0.567113	2.38099	0.44973	0	0.0572985
Polr2a	4543.26	1.64046	0.180234	9.10184	8.88179e-20	1.94749e-17	430.786	134.568	323.917	140.489	570.217	123.635	398.224	139.579
Lmo7	513.395	1.64029	0.274471	5.9762	2.28403e-09	1.45031e-07	48.7585	15.1273	32.2857	14.5387	52.7481	15.3726	61.2416	15.4706
Gcnt2	139.19	1.63757	0.472893	3.46287	0.000534448	0.00810945	13.2391	4.08139	16.6021	3.86668	15.1407	4.25199	7.97469	4.12549
Limch1	3611.81	1.63695	0.167562	9.76922	1.52623e-22	4.16848e-20	342.39	107.056	231.511	100.688	403.059	105.482	392.6	114.998
Kcp	11.5208	1.63497	1.92902	0.847563	0.396681	0.657409	1.2083	0.225322	0.353236	0.618668	0	0	3.27167	0.0572985
BC006779	45.5171	1.63415	0.765743	2.13407	0.0328374	0.162444	4.29521	1.36883	5.15724	1.18578	4.45673	1.43096	3.27167	1.48976
Dbn1	4097.49	1.6224	0.162306	9.99593	1.58795e-23	4.4145e-21	385.858	124.025	319.466	134.148	467.285	118.402	370.823	119.525
Serpina3i	10.8578	1.62078	1.56099	1.0383	0.299129	0.566664	0.9593	0.391817	0.918412	0.464001	0.732613	0.654152	1.22688	0.0572985
Macf1	20059.2	1.61954	0.175227	9.24253	2.40734e-20	5.51138e-18	1900.25	595.869	1236.25	619.906	2456.82	554.435	2007.68	613.266
Mmp23	14.7598	1.6172	1.56967	1.03028	0.302879	0.571057	1.59318	0.243493	0	0.0515557	1.09892	0.44973	3.68063	0.229194
Bcor	1002.53	1.61644	0.197326	8.19171	2.57542e-16	4.55615e-14	94.0635	30.6892	105.405	33.7174	91.2103	27.3517	85.5746	30.9985
Cad	580.773	1.6164	0.291006	5.55453	2.7836e-08	1.38451e-06	54.8856	17.3845	37.6549	20.6738	76.8022	17.2124	50.1997	14.2673
Myo18a	7867.66	1.61122	0.157828	10.2088	1.81177e-24	5.53051e-22	742.717	236.317	550.836	236.383	982.495	239.992	694.821	232.575
Nppc	62.6553	1.6076	0.732464	2.19478	0.0281791	0.147113	6.16301	1.63367	6.92342	1.54667	1.64838	1.63538	9.91725	1.71896
Hspb8	667.927	1.60342	0.239298	6.70051	2.07697e-11	1.82679e-09	62.5699	20.5454	71.5655	18.4569	59.7079	22.6091	56.4363	20.5702
Magee1	5535.28	1.59768	0.174945	9.13245	6.69675e-20	1.51094e-17	522.462	166.336	355.638	169.154	702.698	168.158	509.051	161.696
S1pr2	17.8824	1.59638	1.2539	1.27314	0.20297	0.463183	1.75944	0.465801	3.03783	0.309334	1.83153	0.572383	0.408959	0.515687
Pkp3	2.26307	1.59515	3.51705	0.453547	0.650155	NA	0.219985	0.0616268	0.353236	0.103111	0	0.081769	0.306719	0
Mpdz	1773.28	1.58519	0.178553	8.878	6.80706e-19	1.39437e-16	165.882	54.7816	133.311	55.3193	184.802	51.8416	179.533	57.1839
Hrc	7.97068	1.58131	1.972	0.801883	0.422621	0.679546	0.732118	0.259736	0.0706471	0.206223	0.183153	0	1.94255	0.572985
Tagln2	191.151	1.57816	0.427392	3.69255	0.000222021	0.00395924	18.1043	5.68217	16.3901	6.59913	27.2898	5.23322	10.6329	5.21417
Fgf22	37.5332	1.5748	0.92709	1.69865	0.0893847	0.292586	3.68081	0.98973	0.918412	1.18578	3.78517	0.981228	6.33886	0.80218
Cenpe	89.5361	1.57024	0.712252	2.20461	0.0274814	0.145027	9.39646	1.74521	1.69553	1.70134	22.711	1.75803	3.78287	1.77625
Birc6	7041.7	1.56308	0.413777	3.77759	0.000158353	0.00298627	664.039	212.214	376.125	223.803	888.659	192.525	727.333	220.313
Gch1	244.025	1.56212	0.366133	4.26654	1.98525e-05	0.000505832	22.4981	7.86784	22.2538	5.15557	23.5657	9.85317	21.6748	8.59478
F2rl2	55.2567	1.56178	0.774765	2.01582	0.0438193	0.193581	5.46756	1.40846	4.73336	1.95912	1.34312	1.063	10.3262	1.20327
Mcm2	134.433	1.56175	0.457425	3.41421	0.000639677	0.00935948	12.4747	4.25377	14.1294	4.74312	11.8439	3.4343	11.4508	4.58388
Aqr	1214.19	1.55911	0.21401	7.28522	3.21156e-13	3.70352e-11	112.911	38.1801	96.0094	41.8632	109.709	40.7619	133.014	31.9153
4931406B18Rik	61.5999	1.5586	0.729124	2.13763	0.0325465	0.161817	5.96804	1.69731	1.83682	1.59823	9.52396	1.43096	6.54334	2.06275
Actn1	1132.16	1.55526	0.210811	7.37752	1.6126e-13	1.97677e-11	105.698	35.1855	84.9178	36.2952	138.525	35.2833	93.6515	33.978
Fam101a	34.3376	1.55329	0.890505	1.74429	0.0811093	0.277819	3.27769	0.995201	5.15724	1.18578	1.40417	0.940344	3.27167	0.859478
Mki67	48.5651	1.54602	0.782207	1.97648	0.0481004	0.204434	4.46744	1.57588	2.89653	2.37156	5.18934	1.26742	5.31646	1.08867
Trio	6055.79	1.54452	0.164206	9.40598	5.15472e-21	1.27379e-18	564.705	188.864	400.71	190.653	692.441	183.817	600.965	192.122
Unc13a	4250.39	1.54196	0.201713	7.64436	2.09984e-14	2.91878e-12	398.435	130.474	244.51	136.777	535.906	121.427	414.889	133.219
Cltc	19275.2	1.53304	0.165329	9.27264	1.81594e-20	4.28341e-18	1802.49	596.075	1192.81	581.342	2481.18	596.423	1733.47	610.459
Rdh19	5.41551	1.53242	2.2971	0.667109	0.504702	0.741946	0.551411	0.122482	0	0.154667	0.427357	0.0408845	1.22688	0.171896
Smc1a	3812.14	1.53136	0.168329	9.0974	9.25201e-20	2.00049e-17	354.847	119.526	263.726	114.866	466.186	118.688	334.63	125.025
Ctr9	1966.76	1.52904	0.211443	7.23148	4.77767e-13	5.31277e-11	184.221	60.5183	110.209	58.8766	251.469	60.2229	190.984	62.4554
Baiap3	9069.1	1.52896	0.150999	10.1256	4.25211e-24	1.27302e-21	840.2	288.338	679.908	310.159	987.196	271.8	853.497	283.055
Ccdc86	301.118	1.5275	0.345035	4.42708	9.55154e-06	0.000266321	28.3351	9.13543	41.3992	9.69247	14.7744	7.4001	28.8316	10.3137
Rspo1	538.178	1.52294	0.26527	5.7411	9.40612e-09	5.17436e-07	49.7524	17.2173	51.2192	16.9618	57.449	15.7814	40.5892	18.9085
Vwa5a	444.612	1.52234	0.266876	5.7043	1.16823e-08	6.24981e-07	41.0784	14.2481	36.242	13.6623	49.5735	16.4765	37.4197	12.6057
Setx	3889.51	1.52182	0.204318	7.4483	9.45521e-14	1.20655e-11	364.165	119.837	210.952	122.032	492.316	115.662	389.226	121.817
Il27	13.6864	1.51457	2.24339	0.675125	0.499596	0.738358	1.66873	0.0343705	0	0.103111	5.00619	0	0	0
Ccdc33	18.3169	1.51303	1.34345	1.12623	0.260069	0.524653	1.65637	0.622939	0.918412	1.44356	3.84622	0.367961	0.204479	0.0572985
Tsnaxip1	14.0109	1.50965	1.57711	0.957227	0.338453	0.603901	1.52396	0.219522	0.847765	0.257778	3.72411	0.286192	0	0.114597
Tmem28	342.342	1.50626	0.316634	4.7571	1.96394e-06	6.61788e-05	31.7025	10.8978	41.7524	10.6205	28.5108	10.957	24.8442	11.1159
Unc93a	3.92658	1.5048	2.81859	0.533882	0.593423	0.800833	0.360661	0.127954	0	0.154667	0.366306	0	0.715678	0.229194
Eif4g3	7859.75	1.50003	0.149456	10.0366	1.05276e-23	2.97989e-21	726.155	251.895	544.477	246.333	884.263	248.128	749.724	261.224
Sacs	1002.21	1.49915	0.267476	5.6048	2.08493e-08	1.07835e-06	94.7548	29.9579	50.442	28.6134	157.756	31.2358	76.0663	30.0244
Pnp2	19.8717	1.49768	1.42777	1.04897	0.294192	0.561685	2.1182	0.35459	1.83682	0.515557	4.51778	0.204423	0	0.343791
Mical3	1475.69	1.49666	0.194346	7.70102	1.34989e-14	1.91046e-12	135.891	47.7406	114.802	51.0917	163.128	44.4006	129.742	47.7297
4930579C15Rik	3.31955	1.49243	3.58387	0.416432	0.677094	NA	0.374879	0.038199	0	0	0	0	1.12464	0.114597
Tmem210	3.31955	1.49243	3.58387	0.416432	0.677094	NA	0.374879	0.038199	0	0	0	0	1.12464	0.114597
3930402G23Rik	15.9223	1.48981	1.26293	1.17965	0.23814	0.500891	1.54958	0.431759	3.17912	0.567113	0.549459	0.327076	0.920157	0.40109
Odz1	2068.11	1.48615	0.22534	6.59514	4.24842e-11	3.56029e-09	192.543	64.808	119.323	65.6304	280.102	59.4052	178.204	69.3885
Ptrh1	67.0989	1.48608	0.649724	2.28725	0.0221813	0.125828	6.25579	2.09386	10.2438	2.37156	4.94514	2.53484	3.57839	1.37516
Chodl	130.625	1.47935	0.459976	3.21616	0.0012992	0.0164573	11.9747	4.28	10.5264	4.17601	12.5155	4.25199	12.8822	4.41199
Herc1	10551	1.47534	0.467386	3.15658	0.00159631	0.0193848	988.047	324.894	466.271	327.172	1336.83	307.329	1161.03	340.181
1700045I19Rik	152.145	1.47281	0.457114	3.22196	0.00127315	0.0162197	14.2204	4.71214	20.4877	5.61957	6.83772	4.04757	15.336	4.46929
Polr1a	1400.32	1.46666	0.232865	6.29833	3.00877e-10	2.22787e-08	128.882	45.3706	103.781	47.7406	177.353	38.3497	105.511	50.0216
Cacng5	487.671	1.46555	0.274018	5.34836	8.87537e-08	4.02833e-06	44.8012	15.8834	32.1444	15.776	51.3439	15.6588	50.9154	16.2155
Kifap3	6911.52	1.46527	0.165851	8.83485	1.00234e-18	2.00057e-16	637.962	222.092	420.845	209.419	853.738	226.173	639.305	230.684
Gck	468.084	1.46364	0.29913	4.893	9.93116e-07	3.58811e-05	43.5747	14.6726	42.9534	14.8996	23.871	13.2466	63.8998	15.8717
Sbno2	333.731	1.462	0.318923	4.58417	4.55783e-06	0.000140507	30.559	10.9698	26.9872	11.3938	27.1677	11.7747	37.522	9.74075
Pcdhgb6	134.849	1.46102	0.517617	2.8226	0.00476362	0.0436235	12.2	4.58032	8.76024	5.87735	14.9575	2.53484	12.8822	5.32876
A930003A15Rik	10.8465	1.46062	1.71389	0.852228	0.394088	0.654906	1.1373	0.212408	0.847765	0.154667	2.56414	0.367961	0	0.114597
Pprc1	921.299	1.46054	0.258887	5.6416	1.68477e-08	8.80152e-07	85.3076	29.3368	47.7574	29.3867	101.223	32.0943	106.943	26.5292
Stk32a	651.003	1.45916	0.227235	6.42139	1.35037e-10	1.0459e-08	59.4109	21.5984	51.7843	18.9725	64.2868	23.018	62.1617	22.8048
Lrrc43	41.0961	1.45677	0.944602	1.54221	0.123023	0.351351	3.80698	1.30692	6.1463	1.90756	4.45673	0.408845	0.817917	1.60436
Krtcap3	21.8644	1.44791	1.38378	1.04635	0.295401	0.563026	2.27701	0.443745	0	0.464001	3.96832	0.408845	2.86271	0.458388
Dnahc8	43.7518	1.44774	0.89339	1.6205	0.105124	0.320707	4.25942	1.18495	0.706471	1.28889	6.95982	1.34919	5.11198	0.916777
Spnb1	6342.52	1.44698	0.195223	7.41195	1.24454e-13	1.5625e-11	586.279	202.971	354.86	203.851	831.637	192.484	572.338	212.578
Insrr	12.4148	1.44658	1.7033	0.849278	0.395727	0.656553	1.15969	0.385175	1.3423	0.206223	2.13679	0.204423	0	0.744881
Fam115a	4667.19	1.44587	0.182897	7.90538	2.67109e-15	4.20035e-13	428.864	151.911	284.425	156.472	555.992	147.307	446.174	151.956
Myo5a	17594.5	1.44493	0.179066	8.06926	7.07263e-16	1.19681e-13	1621.44	567.975	1014.35	564.071	2205.04	530.885	1644.93	608.969
Kcna5	442.102	1.44408	0.27785	5.19735	2.02151e-07	8.48271e-06	40.5167	14.4974	56.3058	16.3947	30.8918	12.1427	34.3525	14.9549
C230081A13Rik	1651.36	1.44157	0.202179	7.13017	1.00245e-12	1.05447e-10	151.192	54.3002	114.236	53.1539	199.271	50.9012	140.068	58.8456
Fbxw26	4.85387	1.44073	3.04351	0.473377	0.635944	0.827408	0.518079	0.0859261	1.55424	0.257778	0	0	0	0
Dock11	564.943	1.43943	0.249501	5.76924	7.96301e-09	4.55765e-07	51.2417	19.0584	53.6918	23.3547	46.4599	17.3759	53.5736	16.4447
1110037F02Rik	1444	1.43915	0.19751	7.28646	3.18198e-13	3.6968e-11	132.07	47.6174	101.237	44.905	172.286	47.1807	122.688	50.7665
Muc15	8.32565	1.43842	2.6103	0.551058	0.581594	0.794373	1.0224	0.0136282	0	0	0	0.0408845	3.06719	0
Fam181a	58.926	1.43569	0.718853	1.9972	0.0458035	0.198792	5.57428	1.75834	1.83682	1.49511	8.54715	1.71715	6.33886	2.06275
Igsf10	502.158	1.4304	0.278673	5.13288	2.85345e-07	1.16289e-05	45.7348	16.7527	38.432	18.4569	57.8764	15.1273	40.8959	16.6739
Nxph3	215.7	1.43	0.378562	3.77745	0.000158444	0.00298627	19.8116	7.02965	26.7753	8.1458	11.905	6.01002	20.7547	6.93312
Bhlha15	43.4628	1.42695	0.959417	1.4873	0.136934	0.373344	4.37041	1.038	0.353236	1.13423	4.57883	1.063	8.17917	0.916777
Tmem106a	24.2679	1.42043	1.28315	1.10699	0.268299	0.535429	2.48289	0.536956	2.68459	0.670224	0.0610511	0.654152	4.70302	0.286493
Trim21	87.9904	1.41939	0.619222	2.29222	0.0218932	0.124893	8.20603	2.7433	3.17912	2.88712	10.806	2.24865	10.6329	3.09412
Cts8	2.35363	1.41274	3.48634	0.405222	0.685315	NA	0.196883	0.0959973	0	0.206223	0.488408	0.081769	0.10224	0
Mdn1	4239.91	1.41209	0.487454	2.89686	0.00376917	0.0372561	391.38	136.225	205.371	136.674	574.124	112.596	394.645	159.405
Flnc	107.547	1.41164	0.547049	2.58046	0.00986674	0.0728333	9.72967	3.6533	6.42889	4.58846	16.728	4.82437	6.03214	1.54706
Fn1	335.797	1.40782	0.336478	4.184	2.8642e-05	0.0007011	30.4439	11.342	20.2051	10.8782	36.5696	8.7084	34.557	14.4392
Tfip11	1367.32	1.40768	0.219128	6.424	1.32736e-10	1.03322e-08	124.587	45.5596	84.282	48.2561	132.847	44.0735	156.631	44.3491
Ezr	650.87	1.40755	0.228932	6.14834	7.83e-10	5.27694e-08	58.7769	22.216	54.6102	20.2098	60.99	21.6279	60.7304	24.8103
Pole	39.6229	1.40574	0.823842	1.70632	0.0879485	0.290159	3.66578	1.26481	4.804	1.34045	4.76198	1.5945	1.43136	0.859478
Tprn	672.124	1.40091	0.224643	6.23616	4.48452e-10	3.19198e-08	60.6898	22.9478	58.849	22.2205	68.0109	25.0213	55.2094	21.6015
Fbxo34	1260.46	1.39997	0.233281	6.00121	1.95856e-09	1.25477e-07	115.336	41.5128	69.2342	42.5334	160.015	44.3597	116.758	37.6451
Hivep2	3642.19	1.39895	0.181171	7.72174	1.14753e-14	1.64193e-12	331.308	121.917	230.522	119.661	430.715	114.19	332.688	131.901
Utp20	746.131	1.39753	0.249885	5.59269	2.23572e-08	1.14117e-06	67.8809	24.966	46.1326	23.5094	89.6229	23.4268	67.8871	27.9617
Trrap	4789.74	1.39544	0.407375	3.42544	0.000613798	0.00904031	437.993	158.032	256.944	171.01	588.776	145.917	468.258	157.17
Rxfp2	8.48908	1.39516	1.81941	0.766819	0.443189	0.697016	0.83734	0.219023	0.211941	0.0515557	2.19784	0.204423	0.10224	0.40109
Myh10	17781.5	1.39095	0.152754	9.10587	8.55788e-20	1.90327e-17	1613.62	599.075	1127.53	592.066	1981.29	590.863	1732.04	614.298
Cul7	1860.13	1.38999	0.211	6.58762	4.46929e-11	3.70096e-09	168.544	62.9256	116.78	70.1673	192.86	60.7953	195.993	57.8142
Cdc45	34.6558	1.38822	0.894019	1.55279	0.120474	0.347565	3.07136	1.24114	4.23883	1.54667	2.93045	0.572383	2.04479	1.60436
Cgn	723.904	1.38651	0.223471	6.20442	5.4898e-10	3.79845e-08	65.3832	24.6978	49.7356	21.9627	71.0634	26.0025	75.3506	26.1281
Ift172	1283.27	1.38452	0.258586	5.35418	8.59445e-08	3.92371e-06	117.3	42.3867	69.3048	47.6375	169.417	38.5541	113.179	40.9685
Hk2	194.579	1.38365	0.384917	3.59467	0.000324801	0.0054962	17.5553	6.65776	14.9772	6.54757	16.4227	6.37798	21.2659	7.04772
Parp1	1732.74	1.38158	0.175828	7.8576	3.91566e-15	6.03555e-13	156.205	59.4122	157.543	56.0926	183.581	62.2671	127.493	59.877
Zfp318	2378.8	1.37399	0.175816	7.81493	5.49932e-15	8.23205e-13	215.161	80.8517	147.299	75.7353	249.638	86.4299	248.545	80.3898
Kcne1l	40.525	1.37089	0.80506	1.70284	0.0885985	0.291176	3.59887	1.44397	3.53236	1.95912	3.17465	0.940344	4.08959	1.43246
Lrp1	8000.04	1.36975	0.382206	3.5838	0.000338632	0.00566253	727.811	267.696	421.905	282.834	814.177	242.527	947.353	277.726
Ryr2	5322.47	1.36759	0.429119	3.18698	0.00143764	0.0178479	484.634	177.682	271.779	191.272	633.71	157.732	548.414	184.043
Apc2	3332.14	1.36572	0.171581	7.95962	1.72562e-15	2.79838e-13	299.892	114.752	236.173	119.455	365.268	106.136	298.233	118.665
Serpina3k	10.4039	1.36449	2.17559	0.627179	0.530542	0.760401	1.22102	0.0736122	0	0	3.66306	0.163538	0	0.0572985
Hps6	308.799	1.36431	0.324316	4.20673	2.59096e-05	0.000639241	27.8009	10.6253	26.422	12.0125	35.7149	10.4664	21.2659	9.39696
6430550D23Rik	19.8005	1.36293	1.4171	0.961776	0.336162	0.601731	2.15247	0.311463	0	0.206223	5.12829	0.327076	1.32912	0.40109
Reln	616.02	1.36201	0.315173	4.32148	1.54987e-05	0.000404839	56.7927	19.8635	23.4548	18.6632	75.7644	23.5086	71.1588	17.4188
Pcx	1535.93	1.36173	0.244948	5.55926	2.70925e-08	1.36057e-06	140.171	50.9574	75.3098	53.6695	196.035	52.046	149.168	47.1567
Klhdc8b	1136.26	1.35943	0.205395	6.61859	3.62646e-11	3.0683e-09	101.963	39.4316	93.8194	38.6152	123.018	37.164	89.0508	42.5155
Atp1a1	4218.42	1.35837	0.134514	10.0984	5.61484e-24	1.61874e-21	377.452	147.478	371.745	155.183	364.841	133.406	395.77	153.847
Heatr1	500.836	1.35542	0.326138	4.15598	3.239e-05	0.00078178	46.3039	16.019	22.0419	15.7245	40.5989	15.6588	76.2708	16.6739
Hk1	8863.12	1.35501	0.175362	7.72696	1.10147e-14	1.60258e-12	800.458	302.449	530.207	316.5	1019.92	295.472	851.248	295.374
Stat3	1678.59	1.35091	0.169668	7.96211	1.69136e-15	2.77169e-13	150.414	58.4668	159.027	60.9904	171.981	61.1223	120.234	53.2876
AW551984	3706.84	1.34831	0.190351	7.08329	1.4077e-12	1.41388e-10	335.027	126.244	216.11	126.105	446.161	120.323	342.81	132.302
N4bp2	773.424	1.34477	0.256147	5.25	1.52095e-07	6.61546e-06	69.982	26.2611	45.638	26.2934	66.3625	26.8202	97.9456	25.6697
Srrm2	15042	1.34375	0.140383	9.572	1.04858e-21	2.67611e-19	1348.56	523.237	1027.92	523.187	1542.64	529.005	1475.11	517.52
1700125G02Rik	8.25441	1.34367	2.19032	0.613455	0.539576	0.765316	0.6209	0.40626	0.635824	0	0	0.81769	1.22688	0.40109
Rtdr1	10.783	1.34221	1.59992	0.838924	0.401512	0.661339	1.09207	0.249736	0.141294	0.103111	2.93045	0.531499	0.204479	0.114597
Cspg4	172.888	1.34148	0.529255	2.53466	0.0112557	0.0792926	16.3377	5.17614	4.02689	5.31024	25.4583	5.23322	19.5278	4.98497
Zdbf2	5937.61	1.33865	0.175875	7.61139	2.71166e-14	3.70307e-12	534.744	204.118	337.693	199.933	606.786	182.999	659.753	229.423
Wdr6	11188.1	1.3385	0.164611	8.13131	4.24684e-16	7.42864e-14	1004.47	387.753	733.176	414.508	1283.9	374.993	996.326	373.758
Amot	362.007	1.33757	0.324019	4.12806	3.65841e-05	0.000871801	32.5355	12.5119	21.2648	13.1983	40.66	13.7372	35.6816	10.6002
Xdh	39.8381	1.33422	0.817195	1.63268	0.102536	0.316848	3.60599	1.35138	2.04877	1.28889	4.88408	1.39007	3.88511	1.37516
1700125H20Rik	6.55831	1.33413	2.24444	0.594415	0.552235	0.774908	0.630849	0.185252	1.48359	0.154667	0	0	0.408959	0.40109
Ubr5	6143.36	1.32793	0.187457	7.08389	1.40163e-12	1.41388e-10	553.934	210.532	337.764	210.966	726.141	200.089	597.898	220.542
Srpx	5.67095	1.32768	2.49675	0.531764	0.59489	0.801591	0.57887	0.126811	0	0.257778	0.305255	0.122654	1.43136	0
Myo6	2679.14	1.32622	0.18405	7.20576	5.7722e-13	6.32829e-11	240.554	92.8324	159.945	91.0989	300.188	94.1161	261.529	93.282
Stbd1	46.495	1.32484	0.780609	1.69718	0.0896624	0.293064	4.26055	1.52519	4.73336	1.23734	1.70943	1.39007	6.33886	1.94815
Hspa1a	58.4614	1.32287	0.701927	1.88462	0.0594807	0.232021	5.32721	1.9476	6.71148	2.42312	7.02087	1.75803	2.24927	1.66166
Dnmt1	2169.87	1.32256	0.200903	6.58308	4.60786e-11	3.77554e-09	194.546	75.4681	132.11	80.1175	247.867	74.4916	203.661	71.7951
Prpf6	2952.6	1.31879	0.155988	8.45442	2.80484e-17	5.1983e-15	263.519	103.895	208.833	98.626	251.286	101.843	330.439	111.216
Anxa2	277.555	1.31847	0.351045	3.75583	0.000172769	0.00320963	24.6222	9.91616	19.5693	11.7031	32.4181	11.2841	21.8793	6.76123
Pnmal2	31560.7	1.31811	0.145975	9.0297	1.72151e-19	3.57339e-17	2819.29	1108.06	2100.83	1129.79	3460.37	1101.06	2896.65	1093.31
Nup133	941.787	1.31638	0.247884	5.31046	1.09352e-07	4.89298e-06	84.9621	32.2317	47.4042	30.9334	102.993	31.7264	104.489	34.0353
Ltbr	65.1068	1.31561	0.644691	2.04068	0.0412823	0.186614	5.83265	2.26909	9.11348	3.09334	4.09042	2.16688	4.29407	1.54706
Myh4	32.0231	1.31315	0.915236	1.43477	0.151352	0.395411	2.88489	1.1	1.90747	1.08267	4.39568	0.899459	2.35151	1.31787
Pcbd1	712.648	1.3125	0.228094	5.75419	8.70588e-09	4.91062e-07	63.379	25.3013	67.6799	24.7467	52.3208	25.4302	70.1364	25.727
Kndc1	5543.97	1.31168	0.17416	7.53143	5.01862e-14	6.56553e-12	495.594	194.286	346.03	205.449	630.474	195.714	510.278	181.694
4930579G22Rik	9.01691	1.3087	1.89311	0.691297	0.489379	0.731578	0.91095	0.211094	2.11941	0.412445	0	0.163538	0.613438	0.0572985
Neil2	68.9252	1.30855	0.66122	1.97899	0.0478168	0.203529	6.06337	2.51353	4.66271	3.04179	6.16616	3.06634	7.36126	1.43246
Hic2	287.779	1.30813	0.351665	3.71981	0.000199376	0.00359662	25.6994	10.1111	30.025	8.30047	16.6059	10.0576	30.4674	11.9754
Zfp184	114.014	1.30422	0.50344	2.59063	0.00958009	0.0714026	10.1921	3.99559	14.0588	3.96979	9.46291	4.57907	7.05454	3.43791
Tmc3	45.9862	1.30325	0.78289	1.66467	0.0959784	0.304735	4.13779	1.58463	5.01595	1.54667	5.25039	1.43096	2.14703	1.77625
Mtap1b	86712.4	1.30163	0.379457	3.43024	0.000603058	0.00892434	7808.6	2981.7	4471.54	3034.72	10724.2	2897.28	8230.09	3013.1
Gad1	7235.42	1.29367	0.148269	8.72517	2.65788e-18	5.2377e-16	641.389	258.971	544.619	280.978	787.07	257.859	592.479	238.075
Tesc	176.997	1.291	0.401933	3.21198	0.00131822	0.0166575	15.6875	6.33762	19.8518	7.01157	13.9196	6.50064	13.2912	5.50066
1500012F01Rik	509.922	1.29075	0.283084	4.55961	5.12497e-06	0.000155527	44.9082	18.5454	51.9963	15.0543	43.4683	17.3759	39.26	23.2059
Ap3b2	4512.64	1.29048	0.17551	7.35271	1.94222e-13	2.30813e-11	402.24	159.302	269.519	161.06	500.741	161.167	436.461	155.68
Lpo	43.0226	1.28949	0.827846	1.55764	0.119318	0.34591	3.89029	1.46335	5.86371	1.80445	4.27357	0.981228	1.5336	1.60436
Nup98	898.376	1.28816	0.252761	5.09637	3.46225e-07	1.37151e-05	80.2076	31.5843	57.0122	30.985	113.372	28.4147	70.2387	35.3532
Ecel1	1092.39	1.28735	0.193855	6.64077	3.12045e-11	2.6546e-09	96.3047	39.63	102.438	43.513	95.7891	34.1795	90.6866	41.1976
Ints1	2214.41	1.28717	0.230085	5.59431	2.21497e-08	1.1343e-06	199.062	76.4933	109.503	79.8598	272.776	72.6109	214.908	77.0092
Fhl4	29.7097	1.28713	1.04976	1.22613	0.220152	0.481839	2.79955	0.89746	4.9453	0.876447	0.488408	1.18565	2.96495	0.630284
Serhl	78.4155	1.28686	0.605818	2.12416	0.0336564	0.16508	7.0406	2.71725	10.2438	2.62934	4.33462	2.65749	6.54334	2.86493
Rab42-ps	30.5892	1.28566	1.00799	1.27546	0.202145	0.462431	2.83182	0.97463	2.89653	0.928002	0.793664	1.3083	4.80526	0.687582
Fam40b	566.653	1.28555	0.288709	4.45274	8.47826e-06	0.000238679	50.6702	19.8429	33.2041	20.0036	71.6739	18.1527	47.1325	21.3724
Ikbkap	1961.57	1.28451	0.214509	5.98813	2.12262e-09	1.3543e-07	175.988	68.1057	98.6234	65.0633	231.2	68.0318	198.14	71.2221
5430402O13Rik	12.1179	1.28446	1.5542	0.826443	0.408553	0.667613	1.24664	0.261278	0.918412	0.309334	0.0610511	0.245307	2.76047	0.229194
Atp6v1a	9662.33	1.28375	0.16817	7.63362	2.28254e-14	3.14465e-12	860.735	341.623	581.92	349.96	1124.19	344.984	876.092	329.925
Lbp	26.5932	1.28353	0.985513	1.30239	0.192782	0.450973	2.33218	0.977016	3.03783	0.72178	1.70943	0.776806	2.24927	1.43246
Igsf9	112.466	1.28347	0.506253	2.53524	0.011237	0.0792926	10.0556	3.93943	10.0319	3.86668	14.1028	4.45641	6.03214	3.49521
2900026A02Rik	1030.21	1.28218	0.20227	6.33897	2.3131e-10	1.74807e-08	90.7034	37.4932	86.8253	43.3068	92.5534	33.9341	92.7314	35.2386
Il3ra	20.1136	1.28005	1.52212	0.840969	0.400365	0.660264	1.96129	0.541599	3.53236	0.103111	0	0.776806	2.35151	0.744881
Pik3cg	63.929	1.27881	0.645091	1.98237	0.047438	0.202833	5.59124	2.36395	3.67365	1.49511	5.7388	2.04423	7.36126	3.55251
Fgf7	24.0809	1.2767	1.08594	1.17566	0.239729	0.502306	2.04186	0.954716	1.41294	1.392	2.25889	1.18565	2.45375	0.286493
Fam179a	269.101	1.27411	0.369228	3.45074	0.000559042	0.00840886	23.9956	9.4907	19.9931	8.55824	35.2265	9.19901	16.7673	10.7148
Pla2g4c	5.10913	1.27045	2.32267	0.54698	0.584392	0.795215	0.516843	0.118925	0	0.103111	0.732613	0.081769	0.817917	0.171896
Ogdhl	3123.61	1.26717	0.203093	6.23934	4.3941e-10	3.16275e-08	277.35	111.345	187.003	126.054	384.438	113.209	260.609	94.7718
Cc2d1a	1622.1	1.26503	0.174564	7.2468	4.26725e-13	4.81395e-11	142.843	59.0071	120.453	58.9281	164.533	61.3677	143.545	56.7256
F630111L10Rik	29.138	1.26366	0.950198	1.3299	0.183552	0.440036	2.58518	1.04069	2.89653	1.13423	1.58733	1.18565	3.27167	0.80218
Fxyd2	138.013	1.26358	0.486761	2.59589	0.00943459	0.0707163	12.4046	4.76948	19.9225	5.10401	10.1345	4.04757	7.15678	5.15687
Bcam	280.154	1.26146	0.335129	3.7641	0.000167149	0.00311637	24.6518	10.21	20.417	10.5689	28.694	9.40344	24.8442	10.6575
Ppp1r17	234.107	1.261	0.366143	3.44401	0.000573164	0.00857982	20.6484	8.48338	15.7543	9.02225	21.551	8.1769	24.6398	8.25099
Dcaf12l2	107.534	1.2601	0.529281	2.38078	0.0172761	0.106855	9.60263	3.77865	5.01595	3.50579	10.5008	3.18899	13.2912	4.64118
Sec14l3	100.217	1.25848	0.586332	2.14636	0.0318444	0.159509	8.80176	3.66903	5.93436	5.20712	7.99769	3.39341	12.4732	2.40654
Gimap6	27.4866	1.25767	0.954497	1.31762	0.18763	0.444533	2.41318	1.00719	2.11941	1.08267	2.56414	1.02211	2.55599	0.916777
Lrrc26	17.9855	1.25536	1.70338	0.736984	0.461132	0.710859	2.02298	0.215094	0	0.154667	0.854715	0.490614	5.21422	0
2310015D24Rik	3.57241	1.25349	3.5725	0.350872	0.725685	NA	0.427357	0.0171852	0	0.0515557	1.28207	0	0	0
Krt18	59.9817	1.25186	0.710714	1.76142	0.078168	0.272546	5.36041	2.10358	3.03783	2.62934	4.76198	1.96246	8.28141	1.71896
Pdcd11	797.445	1.25177	0.289402	4.32537	1.52278e-05	0.000398431	71.8651	27.3672	32.0031	26.5512	91.5766	27.7606	92.0157	27.7898
Zfp442	144.534	1.25171	0.44001	2.84472	0.00444502	0.0416366	12.6987	5.28681	14.624	5.41335	13.2481	5.51941	10.224	4.92767
Dync2h1	2784.17	1.2517	0.20552	6.09039	1.12636e-09	7.49363e-08	248.093	98.3624	143.838	94.7078	339.322	95.1791	261.12	105.2
Krt17	9.35743	1.25119	1.56292	0.800548	0.423393	0.680296	0.813385	0.351033	0.706471	0.464001	0.915766	0.245307	0.817917	0.343791
Resp18	2581.17	1.24969	0.155691	8.02677	1.00076e-15	1.67525e-13	226.763	94.4318	241.613	93.1096	182.054	89.7415	256.622	100.444
Gtf3c1	3976.95	1.24915	0.189411	6.59496	4.25369e-11	3.56029e-09	351.098	143.786	240.553	157.451	440.178	137.822	372.561	136.084
Tmem38b	5545.2	1.24696	0.673916	1.85032	0.0642678	0.244089	435.92	254.113	255.743	37.8934	505.136	332.35	546.88	392.094
Il27ra	1.96394	1.24685	3.96372	0.314567	0.75309	NA	0.203504	0.0408845	0	0	0.610511	0.122654	0	0
Polr2b	2198.34	1.24603	0.194309	6.4126	1.43058e-10	1.0971e-08	194.672	78.8844	121.654	75.7353	231.506	78.58	230.857	82.338
Acsbg2	15.6529	1.2449	1.2812	0.971668	0.331216	0.597424	1.44627	0.501543	2.68459	0.670224	0.427357	0.490614	1.22688	0.343791
Ubr1	2184.65	1.24351	0.197856	6.2849	3.28061e-10	2.39777e-08	192.754	79.0981	134.3	80.6846	247.867	73.4695	196.096	83.1402
Arhgap21	4659.32	1.24216	0.158314	7.84613	4.29071e-15	6.54881e-13	410.107	169.688	300.603	167.35	428.334	167.872	501.383	173.844
Dhx9	3145.51	1.24169	0.17201	7.2187	5.24877e-13	5.79524e-11	277.072	114.348	197.6	109.195	346.526	111.001	287.089	122.848
Zc3h7a	532.707	1.24081	0.309007	4.01548	5.9324e-05	0.00131748	47.6917	18.5972	22.8897	17.8898	61.2953	20.4831	58.8901	17.4188
Ccr4	37.6248	1.23855	0.943713	1.31242	0.189379	0.446502	3.58949	1.09246	1.83682	0.618668	0.854715	1.51273	8.07693	1.14597
Asb2	94.2525	1.23826	0.586066	2.11283	0.0346153	0.168141	8.3666	3.36198	4.59206	4.0729	8.8524	3.14811	11.6553	2.86493
Pcdhb8	35.7917	1.23809	0.863902	1.43313	0.15182	0.396042	3.1661	1.28774	1.90747	1.23734	3.29676	1.5945	4.29407	1.03137
Nedd4	13266.8	1.23766	0.13621	9.08645	1.02327e-19	2.18223e-17	1163.75	487.142	906.261	479.983	1304.23	481.17	1280.76	500.274
Csl	8.77977	1.23728	1.89168	0.654065	0.51307	0.747453	0.923969	0.168567	2.26071	0.309334	0	0.081769	0.511198	0.114597
Rictor	1843.95	1.23477	0.202935	6.08455	1.16817e-09	7.73872e-08	162.859	66.5976	120.524	67.1255	228.087	65.4561	139.966	67.2112
Copa	5920.5	1.23474	0.189133	6.52838	6.64838e-11	5.33515e-09	524.394	212.34	331.406	216.482	721.99	203.605	519.787	216.932
Akap6	8745.46	1.23287	0.172213	7.15895	8.12986e-13	8.72866e-11	772.504	315.761	496.155	312.685	1002.52	311.09	818.838	323.508
Onecut1	83.5065	1.23179	0.602185	2.04553	0.0408029	0.185307	7.46466	2.9267	3.603	2.93867	8.66925	2.86192	10.1217	2.97952
Dmxl2	6998.1	1.23149	0.386801	3.18379	0.00145358	0.0179741	623.207	247.621	339.671	243.137	866.925	241.137	663.024	258.588
Magel2	899.195	1.22999	0.219493	5.60378	2.09732e-08	1.08116e-06	78.495	33.3988	69.0222	38.2543	73.3223	28.8236	93.1403	33.1186
Sdk2	469.777	1.22571	0.282222	4.34306	1.40512e-05	0.000372021	41.2274	17.2306	44.7903	19.024	50.3671	16.1085	28.5249	16.5593
Sepn1	331.085	1.22539	0.355848	3.44359	0.000574047	0.00858479	29.4184	11.781	38.0081	11.2907	15.6901	12.3062	34.557	11.7462
Dhh	4.235	1.22371	3.21753	0.380325	0.703704	0.863092	0.423883	0.103111	1.27165	0.309334	0	0	0	0
Nup155	500.841	1.22296	0.286529	4.26817	1.9708e-05	0.000502974	44.2404	18.0832	28.1176	17.4258	61.3563	18.3163	43.2474	18.5074
Gbf1	2690.16	1.21946	0.172156	7.08345	1.40608e-12	1.41388e-10	235.529	99.2283	184.389	101.616	298.906	99.9217	223.291	96.1469
Prtn3	35.7899	1.21937	1.00612	1.21195	0.225533	0.486602	3.11644	1.33718	5.65177	1.44356	0.732613	2.16688	2.96495	0.40109
Ppargc1b	992.747	1.21835	0.249877	4.87578	1.0838e-06	3.87877e-05	87.4791	36.0562	53.1973	38.3574	103.115	34.0568	106.125	35.7543
Crocc	1601.02	1.21703	0.195163	6.23596	4.49027e-10	3.19198e-08	139.905	59.322	119.182	61.0935	125.704	62.2671	174.83	54.6055
Sgsm1	5603.2	1.21641	0.160469	7.58035	3.44619e-14	4.54664e-12	489.507	207.742	377.114	219.266	576.017	196.368	515.39	207.593
Sec23b	886.242	1.21096	0.23066	5.24996	1.52128e-07	6.61546e-06	77.3917	32.8903	59.4849	35.6765	96.5217	32.3396	76.1686	30.6547
Syne2	906.069	1.21087	0.206469	5.86464	4.50108e-09	2.69511e-07	78.9407	33.8085	67.3267	32.0161	76.2528	34.6292	93.2426	34.7802
Mcm3ap	1484.33	1.21052	0.218077	5.55087	2.84258e-08	1.4029e-06	129.866	54.8403	88.3795	57.897	153.482	47.2625	147.736	59.3613
Avpr1b	47.8969	1.21009	0.765213	1.58138	0.113792	0.336088	4.34715	1.61303	3.603	1.44356	1.77048	1.39007	7.66798	2.00545
Polr3a	738.393	1.20961	0.252436	4.79174	1.65339e-06	5.63237e-05	64.8098	27.0742	44.7903	24.5405	89.3177	25.7981	60.3214	30.8839
Usp51	170.122	1.20847	0.42016	2.87622	0.0040247	0.0388447	14.7703	6.39931	14.9065	5.72268	17.0332	5.96914	12.371	7.50611
Hspb1	127.348	1.20793	0.464302	2.60161	0.00927878	0.0699187	11.0533	4.79354	9.25477	4.0729	12.4544	5.72383	11.4508	4.58388
Hs3st3b1	73.8266	1.20576	0.700618	1.721	0.0852506	0.285742	6.62187	2.56494	2.82588	3.50579	11.4165	1.8398	5.62318	2.34924
Spata20	3.00067	1.20554	3.72208	0.323888	0.746023	NA	0.305255	0.0681409	0	0	0.915766	0.204423	0	0
CK137956	53.878	1.20426	0.700702	1.71864	0.0856792	0.286274	4.70754	1.99692	6.28759	2.26845	3.54096	2.00334	4.29407	1.71896
Vwa5b1	1169.44	1.20201	0.233805	5.1411	2.7313e-07	1.12489e-05	102.215	43.3082	70.6471	48.5139	130.588	41.1298	105.409	40.2809
Myo7a	514.483	1.20168	0.26445	4.54406	5.51811e-06	0.000166375	45.0379	18.9832	27.6937	14.848	58.2427	19.8699	49.1773	22.2318
1110038B12Rik	147.801	1.2013	0.450057	2.66921	0.00760291	0.06098	12.9371	5.45492	13.9881	5.0009	8.66925	5.51941	16.1539	5.84445
Ylpm1	6468.52	1.20115	0.152307	7.88637	3.11099e-15	4.84318e-13	564.843	240.085	429.958	217.668	739.878	243.713	524.694	258.875
Sf3b3	1809.74	1.19953	0.182159	6.58509	4.54622e-11	3.74474e-09	157.434	67.7661	149.065	72.3326	192.677	64.5566	130.56	66.409
Kif22	66.6803	1.19647	0.634295	1.88629	0.0592554	0.231629	5.79045	2.50709	7.41795	2.78401	5.25039	2.04423	4.70302	2.69303
Serpine1	18.0293	1.1949	1.17389	1.01789	0.308729	0.577528	1.60264	0.640882	0.847765	0.515557	1.40417	0.776806	2.55599	0.630284
4921530D09Rik	8.08057	1.19082	1.96294	0.60665	0.544083	0.769167	0.867503	0.138025	0.353236	0.103111	0	0.081769	2.24927	0.229194
Prrc2b	17526.5	1.19005	0.136517	8.71723	2.85098e-18	5.54801e-16	1523.2	657.765	1160.38	643.621	1699.05	641.805	1710.16	687.869
S100a10	600.776	1.1894	0.29186	4.07525	4.5965e-05	0.00105503	53.1439	21.6153	79.8312	21.0347	30.5255	21.1782	49.075	22.6329
Akap2	4730.4	1.1891	0.14886	7.98802	1.37122e-15	2.27097e-13	410.492	178.149	323.211	176.424	441.643	166.359	466.622	191.664
Prrc2c	12156.5	1.188	0.142415	8.34184	7.31425e-17	1.32405e-14	1056.33	456.394	805.589	444.152	1253.81	441.43	1109.61	483.6
Ckap5	5252.62	1.1877	0.190585	6.23183	4.61009e-10	3.2475e-08	461.611	192.013	279.763	192.767	639.266	192.239	465.804	191.033
D030016E14Rik	1624.44	1.18714	0.237535	4.99775	5.8003e-07	2.2078e-05	142.87	59.2717	84.8472	63.8259	202.262	56.4615	141.5	57.5277
Kif1a	29967.9	1.18595	0.156015	7.60155	2.92597e-14	3.961e-12	2613.49	1115.65	1779.04	1125.87	3185.34	1128.45	2876.1	1092.63
Ndst2	216.007	1.18541	0.465913	2.54427	0.0109505	0.0777726	19.5386	7.34076	8.97218	7.63024	34.9212	5.96914	14.7225	8.42289
Aco1	675.149	1.18319	0.235961	5.01434	5.32157e-07	2.03553e-05	58.5646	25.4494	45.7087	25.1592	68.7435	26.207	61.2416	24.9822
Acsl5	683.341	1.1831	0.241796	4.89295	9.93367e-07	3.58811e-05	59.3802	25.6532	43.8012	24.3858	73.2002	24.8987	61.1393	27.6752
Flii	2452.22	1.18167	0.172549	6.8483	7.47323e-12	6.96666e-10	212.514	92.6347	170.825	98.0589	253.24	91.9493	213.476	87.896
Bptf	6471.13	1.17958	0.135954	8.67628	4.08933e-18	7.85958e-16	559.71	245.543	468.956	244.683	595.919	235.822	614.256	256.124
9030224M15Rik	39.5107	1.17928	0.896706	1.31513	0.188467	0.445104	3.63639	1.28024	1.90747	1.95912	7.57033	1.02211	1.43136	0.859478
Mamstr	35.9544	1.17385	0.863684	1.35912	0.174108	0.428322	3.07944	1.39465	4.23883	1.08267	2.13679	0.981228	2.86271	2.12005
2310061J03Rik	154.951	1.17193	0.446382	2.6254	0.00865475	0.0666686	13.6177	5.66404	17.1672	6.65068	7.02087	4.78349	16.6651	5.55796
Dnaic2	94.0216	1.17131	0.546102	2.14486	0.0319644	0.159814	8.14478	3.55506	6.42889	3.86668	10.4397	3.47518	7.56574	3.32332
Myl7	3.33992	1.17097	3.55695	0.329206	0.742	NA	0.329687	0.0859261	0.98906	0.257778	0	0	0	0
Srms	2.75472	1.16955	3.94367	0.296564	0.7668	NA	0.325606	0.0171852	0	0.0515557	0.976817	0	0	0
4931423N10Rik	6.33131	1.16896	1.93387	0.60447	0.545532	0.770096	0.516132	0.271721	0.141294	0.103111	0.793664	0.081769	0.613438	0.630284
Atic	902.194	1.16824	0.224919	5.19403	2.05788e-07	8.61213e-06	77.8824	34.3846	79.3367	32.6863	91.6376	32.7076	62.6729	37.7597
Ddb1	5607.64	1.16714	0.162084	7.20085	5.98374e-13	6.51432e-11	485.981	211.822	363.762	220.555	616.005	215.053	478.175	199.857
Tap2	102.553	1.16594	0.591127	1.97241	0.0485632	0.205376	9.47506	3.28642	10.809	3.76357	2.07574	2.3713	15.5404	3.7244
Psmb9	23.3071	1.16381	1.43183	0.812811	0.416326	0.673855	2.42365	0.476644	6.1463	0.309334	0	0.776806	1.12464	0.343791
1110006O24Rik	24.8314	1.1632	1.05616	1.10135	0.270743	0.538167	2.37373	0.716238	0.847765	0.618668	0.854715	0.613268	5.4187	0.916777
Myo10	1622.72	1.16301	0.209997	5.53825	3.05507e-08	1.49564e-06	141.036	60.8925	91.7	62.2277	169.05	62.0627	162.357	58.3872
Fndc7	2.42764	1.16243	3.94538	0.29463	0.768276	NA	0.284905	0.0171852	0	0.0515557	0.854715	0	0	0
Heph	26.0333	1.16151	1.07454	1.08094	0.279724	0.547354	2.28974	0.949787	2.96718	1.08267	0.732613	1.3083	3.16943	0.458388
Irx4	5.32861	1.1608	3.06892	0.378244	0.70525	0.863858	0.635824	0.0272563	1.90747	0	0	0.081769	0	0
Gsn	1066.25	1.15856	0.230191	5.03302	4.82801e-07	1.85129e-05	92.832	39.8503	59.1316	39.2854	123.873	40.5574	95.4919	39.7079
Herc2	8296.72	1.15819	0.408879	2.83259	0.00461733	0.0427364	727.202	305.223	397.531	312.118	986.707	286.805	797.367	316.746
Ptprn	6642.81	1.15808	0.124395	9.30972	1.28167e-20	3.06969e-18	571.401	255.215	623.249	269.636	491.217	232.551	599.738	263.459
Exoc1	1108.56	1.1567	0.264093	4.37988	1.18746e-05	0.000323755	97.9806	39.9659	45.1435	37.9965	113.433	41.6204	135.365	40.2809
Itprip	12.8007	1.15643	1.68152	0.687732	0.491621	0.732679	1.19896	0.393932	3.10847	0.412445	0.488408	0.081769	0	0.687582
Rhobtb1	120.267	1.1546	0.557905	2.06953	0.038496	0.178894	10.77	4.19573	12.7165	3.35112	16.1175	5.11056	3.47615	4.12549
Cdkl5	1592.5	1.15446	0.20648	5.59116	2.25563e-08	1.14757e-06	138.506	59.6614	85.3417	56.7628	157.084	58.7919	173.092	63.4295
Smarca4	6159.91	1.15025	0.163585	7.03154	2.0427e-12	2.03851e-10	531.681	234.844	393.222	246.23	649.522	228.708	552.299	229.595
Ifi30	36.8039	1.14988	0.862626	1.333	0.182533	0.438675	3.28145	1.29835	1.13035	0.876447	3.60201	1.75803	5.11198	1.26057
Rcn3	32.7867	1.14894	0.921277	1.24711	0.212356	0.473393	2.9123	1.1676	1.62488	1.392	5.06724	1.02211	2.04479	1.08867
Pcdhgb8	77.3395	1.1485	0.647958	1.7725	0.0763118	0.269624	7.059	2.56496	4.02689	2.83556	13.9807	2.73926	3.16943	2.12005
Gba	264.929	1.14829	0.343933	3.33869	0.000841733	0.0116896	23.0304	9.93667	34.4758	11.9094	17.6438	8.79017	16.9718	9.11047
Gpr174	35.1201	1.14773	0.89986	1.27545	0.20215	0.462431	3.12895	1.24131	1.201	1.392	2.8694	0.899459	5.31646	1.43246
Lgals3bp	189.412	1.14713	0.393407	2.91589	0.00354681	0.0357036	16.2619	7.3081	13.3523	7.47557	17.6438	6.54152	17.7897	7.9072
4933412E12Rik	45.2922	1.14673	0.759367	1.51012	0.131013	0.363893	3.89528	1.74078	3.46171	1.59823	3.41886	1.96246	4.80526	1.66166
Cul9	1964.81	1.14551	0.20907	5.47905	4.27604e-08	2.02339e-06	170.11	74.3871	110.139	78.5709	208.184	76.2905	192.006	68.2999
E330023G01	25.0741	1.14526	1.03526	1.10626	0.268615	0.535739	2.2897	0.830463	1.27165	0.773335	1.09892	0.858575	4.49855	0.859478
Pcdha5	35.2166	1.1436	0.882808	1.29541	0.195179	0.45405	3.08562	1.29665	3.10847	1.95912	1.34312	0.899459	4.80526	1.03137
Myo5b	899.019	1.14356	0.270772	4.22332	2.40726e-05	0.000600581	77.9233	33.9485	49.1704	39.9557	107.511	31.8081	77.0887	30.0817
5430411K18Rik	1684.01	1.14316	0.196379	5.82117	5.84371e-09	3.43302e-07	145.167	64.387	114.307	68.4144	187.976	62.6351	133.218	62.1116
Ostf1	368.571	1.14311	0.291896	3.91616	8.99724e-05	0.00188265	31.6095	14.2547	30.5902	14.5387	36.0201	13.9007	28.2181	14.3246
Fam60a	76.1915	1.1425	0.608042	1.87898	0.0602477	0.233683	6.5407	2.9404	7.41795	2.78401	4.94514	3.51607	7.25902	2.52114
Elovl2	55.991	1.14166	0.704251	1.6211	0.104995	0.320481	4.89452	2.07287	4.30947	2.57778	2.80835	1.63538	7.56574	2.00545
Mir677	2.65143	1.14064	3.93301	0.290018	0.771802	NA	0.272639	0.0572985	0	0	0	0	0.817917	0.171896
A930001A20Rik	1.77349	1.1406	3.95072	0.288707	0.772806	NA	0.203504	0.0171852	0	0.0515557	0.610511	0	0	0
Mir1983	4.19251	1.13818	2.73739	0.415792	0.677562	0.849868	0.379853	0.141853	0.423883	0	0	0.081769	0.715678	0.343791
Dusp27	87.5459	1.13794	0.780551	1.45787	0.144877	0.385342	8.5324	2.36162	0.49453	2.21689	10.0734	2.28953	15.0292	2.57843
Pik3r4	966.357	1.13743	0.260211	4.3712	1.23565e-05	0.000333389	83.7318	36.5195	51.5017	40.9352	111.052	34.8745	88.6418	33.7488
Gabre	314.622	1.13623	0.325904	3.4864	0.000489569	0.00756935	26.9475	12.2034	22.5364	12.4249	32.235	10.5482	26.0711	13.6371
Samd11	161.566	1.13545	0.441588	2.57128	0.0101324	0.0739192	14.3492	5.75573	26.422	7.78491	8.24189	4.4973	8.38365	4.98497
Glp1r	53.5646	1.135	0.702519	1.61562	0.106177	0.322496	4.55874	2.10671	4.9453	2.32001	4.33462	2.45307	4.39631	1.54706
Inhbc	1.60995	1.13253	3.95276	0.286516	0.774483	NA	0.183153	0.0171852	0	0.0515557	0.549459	0	0	0
Dpys	10.6857	1.13179	1.48085	0.764282	0.444699	0.698242	0.91349	0.416217	1.13035	0.618668	1.09892	0.286192	0.511198	0.343791
Tmtc4	366.863	1.13072	0.358014	3.15832	0.00158681	0.0192845	31.7772	13.8744	38.7146	14.6934	17.7659	15.9858	38.8511	10.944
Mas1	17.9643	1.12995	1.45044	0.779042	0.435955	0.691135	1.74638	0.489058	2.61394	0.567113	2.6252	0.327076	0	0.572985
Ubr2	2122.79	1.12995	0.177915	6.35106	2.13839e-10	1.62393e-08	182.453	81.7017	133.24	80.2206	198.904	81.9734	215.215	82.911
Dnahc11	84.9991	1.12768	0.560798	2.01084	0.0443422	0.19506	7.24371	3.33338	7.91248	3.96979	5.12829	2.24865	8.69037	3.7817
Dnase1	102.595	1.12467	0.562141	2.00068	0.0454266	0.197542	8.96331	3.80341	11.4448	4.38223	11.3555	3.18899	4.08959	3.839
Odz2	2186.38	1.12347	0.190561	5.8956	3.73331e-09	2.27922e-07	187.74	84.3276	131.474	85.6856	215.51	75.9634	216.237	91.3339
Cngb1	309.593	1.12346	0.3327	3.37681	0.000733324	0.010388	26.819	11.706	29.1066	12.3734	15.8733	10.4256	35.4772	12.3192
Wdr3	502.87	1.12302	0.293708	3.82361	0.000131514	0.00253679	43.6609	18.915	24.5852	17.9414	58.2427	19.0931	48.1549	19.7107
Wdr81	803.623	1.12119	0.2585	4.3373	1.44244e-05	0.000381254	68.6251	31.3759	51.3605	38.3574	83.1515	28.7827	71.3633	26.9876
Pdxk-ps	18.0368	1.1207	1.18821	0.943183	0.345587	0.611928	1.56488	0.679581	0.777118	0.72178	1.77048	0.858575	2.14703	0.458388
Snhg10	45.8252	1.11672	0.813616	1.37254	0.169895	0.42297	3.95852	1.74386	1.83682	1.80445	4.51778	2.45307	5.52094	0.974075
Tec	40.167	1.1128	0.803968	1.38413	0.166319	0.417371	3.42958	1.56871	2.82588	1.75289	4.39568	1.63538	3.06719	1.31787
Ptprc	14.3938	1.10983	1.42395	0.779405	0.435741	0.690937	1.35276	0.438374	0.49453	0.464001	3.05255	0.163538	0.511198	0.687582
Ipo4	1985.75	1.1084	0.179878	6.16194	7.18602e-10	4.864e-08	169.738	77.3647	145.109	83.0047	220.15	79.0706	143.953	70.0188
Sdf2l1	89.8267	1.10832	0.55125	2.01056	0.044372	0.1951	7.5479	3.62993	7.41795	2.88712	5.92195	2.61661	9.30381	5.38606
Tmem22	431.303	1.10635	0.283176	3.90693	9.34747e-05	0.00194808	36.825	16.8454	38.5733	16.0854	28.4498	17.3759	43.4519	17.075
A930038C07Rik	233.943	1.10433	0.365197	3.02392	0.00249522	0.0274527	20.0517	9.05969	14.624	8.91913	26.9235	9.60786	18.6076	8.65208
Slc25a45	32.5806	1.10311	0.905896	1.2177	0.223338	0.483713	2.72869	1.32556	3.39106	1.392	2.13679	1.8398	2.65823	0.744881
Zfp352	35.8564	1.10294	0.852569	1.29366	0.195781	0.45471	3.09233	1.36956	5.01595	1.75289	2.6252	1.55361	1.63583	0.80218
Rilp	40.804	1.10243	0.910305	1.21105	0.225875	0.486742	3.83913	1.23842	7.98312	1.392	0.671562	1.34919	2.86271	0.974075
Ttc12	148.333	1.10198	0.443558	2.48441	0.0129766	0.0875681	12.6143	5.84398	14.412	5.61957	13.3091	5.43764	10.1217	6.47473
Tgm6	6.63685	1.10161	2.13574	0.5158	0.605994	0.809305	0.599838	0.226036	0.777118	0.154667	0	0.408845	1.0224	0.114597
1200009I06Rik	67.5421	1.10113	0.805491	1.36703	0.171615	0.425364	6.01549	2.38929	1.27165	3.45423	6.95982	2.45307	9.81501	1.26057
Fryl	2062.61	1.10072	0.198911	5.53374	3.13472e-08	1.52504e-06	177.007	79.6598	116.709	80.2722	227.11	79.2342	187.201	79.4731
Arid1a	5866.75	1.09967	0.140827	7.80867	5.77942e-15	8.48812e-13	498.763	231.282	420.562	237.259	550.009	225.274	525.716	231.314
Dnahc6	84.1015	1.09873	0.591458	1.85767	0.0632159	0.241716	7.07687	3.38854	7.20601	1.95912	4.82303	3.39341	9.20157	4.81308
Col16a1	148.058	1.09692	0.469668	2.33552	0.0195164	0.115613	13.0405	5.38348	4.52142	3.76357	16.6059	5.68295	17.9942	6.70393
Ogdh	8161.76	1.09686	0.144655	7.58257	3.38777e-14	4.50776e-12	694.589	321.043	567.155	332.637	829.867	316.61	686.744	313.881
Prokr2	61.2264	1.09582	0.690084	1.58795	0.112298	0.333609	5.32571	2.29316	5.01595	2.88712	8.30294	2.04423	2.65823	1.94815
Dysf	145.888	1.09505	0.455463	2.40426	0.0162054	0.102016	12.5047	5.64932	17.4498	6.23824	11.7829	4.86526	8.28141	5.84445
Pygl	196.772	1.09471	0.414733	2.63955	0.00830166	0.0648471	16.8721	7.61377	10.8797	8.55824	24.2983	8.38132	15.4382	5.90175
1110002L01Rik	48.598	1.09366	0.738205	1.48151	0.138471	0.375736	4.18306	1.86436	6.005	2.16534	4.09042	1.88069	2.45375	1.54706
6430562O15Rik	66.4798	1.09263	0.699509	1.562	0.118288	0.344201	5.993	2.27961	12.0807	2.73245	2.31994	2.61661	3.57839	1.48976
Nefh	4903.22	1.09257	0.187889	5.81498	6.06426e-09	3.5227e-07	422.222	187.924	253.199	185.394	570.461	191.871	443.005	186.507
Hspa4	7078.41	1.09209	0.157009	6.9556	3.51074e-12	3.35308e-10	604.856	275.966	418.937	266.955	746.715	282.185	648.915	278.757
Tcirg1	85.4161	1.09058	0.634835	1.7179	0.0858156	0.286472	7.47454	3.15445	7.20601	3.04179	3.35781	3.84314	11.8598	2.57843
Gh	10.1978	1.08852	1.75862	0.618962	0.535941	0.763482	1.01187	0.257121	0	0.0515557	2.31994	0.490614	0.715678	0.229194
Pou2f2	323.165	1.08625	0.332008	3.27174	0.00106887	0.0141258	27.4313	12.7825	20.3464	14.5387	27.5951	10.3438	34.3525	13.4652
Fzd5	356.67	1.08511	0.421803	2.57254	0.0100955	0.0737873	31.3914	12.9918	45.5674	12.9405	37.9738	10.7935	10.6329	15.2414
Ltbp4	497.561	1.08461	0.254102	4.26838	1.969e-05	0.000502974	42.1205	19.7949	45.0022	19.5396	34.738	17.4986	46.6213	22.3464
Atad2	141.023	1.08352	0.459098	2.3601	0.0182702	0.110575	11.9062	5.64246	11.3742	6.85691	10.4397	5.60118	13.9046	4.46929
Nefm	6598.17	1.08036	0.150309	7.18754	6.5968e-13	7.13187e-11	562.19	258.87	386.934	236.486	689.266	267.671	610.371	272.455
Mpped2	697.303	1.07974	0.248202	4.35025	1.35984e-05	0.00036198	59.3669	27.4039	77.9944	28.5619	44.0789	29.0689	56.0273	24.5811
Ndufs5	1.80506	1.07765	3.84305	0.280415	0.779159	NA	0.152049	0.0725695	0.211941	0.103111	0.244204	0	0	0.114597
Pls3	2227.56	1.07748	0.165298	6.51841	7.10559e-11	5.67281e-09	188.762	88.4314	162.276	87.3869	230.712	90.0686	173.296	87.8387
Irs2	2457.44	1.07745	0.1599	6.73827	1.60278e-11	1.41773e-09	207.372	98.4255	194.28	109.246	207.818	95.3836	220.02	90.6463
Tes	29.3369	1.0773	1.06062	1.01572	0.309762	0.578292	2.85322	0.797406	0.141294	0.412445	5.55565	1.063	2.86271	0.916777
Aars	4488.27	1.07707	0.167616	6.42581	1.31169e-10	1.02615e-08	382.377	176.133	274.181	175.341	497.322	178.011	375.629	175.047
Epcam	7.61568	1.07521	1.74244	0.617071	0.537188	0.764228	0.688043	0.259636	0.353236	0.206223	1.40417	0.286192	0.306719	0.286493
Rbpms2	49.7069	1.07487	0.750883	1.43148	0.152293	0.39656	4.28345	1.90196	2.26071	1.95912	4.76198	2.08511	5.82766	1.66166
Kdm5b	2148.2	1.07429	0.209032	5.13935	2.75688e-07	1.13243e-05	184.289	83.0282	105.829	80.5815	225.278	81.2375	221.758	87.2657
Synm	1617.9	1.07118	0.177091	6.04876	1.45963e-09	9.54772e-08	136.985	64.3428	105.829	60.8357	148.904	65.2108	156.222	66.982
Ormdl1	104.525	1.06976	0.54974	1.94593	0.0516633	0.212568	8.96207	4.04476	9.8906	4.12445	12.0881	3.59784	4.9075	4.41199
Gcn1l1	2397.12	1.06959	0.188279	5.6809	1.3399e-08	7.07105e-07	202.916	95.3764	156.201	106.308	248.478	91.2951	204.07	88.5262
Dgka	296.277	1.0686	0.322186	3.31671	0.000910848	0.0125045	25.0402	11.8278	22.1832	11.6516	30.3424	11.8565	22.595	11.9754
Snd1	1556.17	1.06849	0.180518	5.91904	3.23823e-09	2.00848e-07	131.719	61.9269	113.177	61.0935	165.326	64.6384	116.655	60.0489
Noc4l	315.422	1.06731	0.346883	3.07687	0.00209187	0.0240164	26.57	12.6804	23.2429	15.0543	23.4436	13.5328	33.0234	9.45426
Cnot1	3266.18	1.06709	0.157496	6.77537	1.24088e-11	1.12971e-09	276.33	130.105	215.191	128.322	321.19	131.812	292.61	130.182
Itpka	204.602	1.06431	0.408943	2.60259	0.00925227	0.0697848	17.3731	8.0871	15.0478	10.0018	12.9428	7.44098	24.1286	6.81853
Pja1	7720.57	1.06415	0.133852	7.95018	1.86239e-15	2.95853e-13	651.761	308.97	550.977	294.383	771.441	311.54	632.864	320.986
Igf2r	774.945	1.0641	0.292602	3.63669	0.000276163	0.00478764	66.8066	29.6258	35.8887	31.7583	66.7899	30.4181	97.7411	26.7011
Klhl34	251.818	1.06387	0.363205	2.92913	0.0033991	0.0344513	21.2511	10.0846	23.5255	9.5378	24.1762	9.19901	16.0516	11.517
Eif3a	9106.27	1.06361	0.15725	6.76379	1.34432e-11	1.21677e-09	774.848	358.316	505.904	337.02	878.341	369.269	940.298	368.659
Kif5a	40596.9	1.06276	0.152587	6.96497	3.28472e-12	3.17618e-10	3446.53	1605.26	2359.26	1603.74	4023.14	1660.85	3957.19	1551.19
Mcm4	279.708	1.06173	0.34786	3.05219	0.00227177	0.0255541	23.7149	11.0914	17.026	12.0125	31.3192	11.693	22.7994	9.56886
Ptpn23	2546.39	1.06099	0.191333	5.54525	2.93534e-08	1.44156e-06	216.664	100.202	143.06	100.894	228.636	98.9814	278.296	100.731
Actn4	1457.86	1.06074	0.228714	4.63785	3.52056e-06	0.000111398	124.319	57.0941	75.875	60.217	159.16	58.1787	137.921	52.8866
Dub1	45.9422	1.0601	0.760967	1.39309	0.163593	0.412974	3.95993	1.75702	3.03783	1.75289	2.50309	1.51273	6.33886	2.00545
Rab3gap2	2350.8	1.05993	0.17104	6.19696	5.75646e-10	3.96533e-08	198.749	93.7794	150.62	93.1096	237.672	98.3272	207.955	89.9014
Ldha	2876.25	1.05686	0.142926	7.39441	1.4204e-13	1.75498e-11	241.741	116.173	249.243	119.094	244.815	114.313	231.164	115.113
Piwil1	15.3334	1.05673	1.2871	0.821016	0.411637	0.670439	1.29957	0.608483	0.635824	0.876447	1.83153	0.490614	1.43136	0.458388
Prr12	4390.72	1.05649	0.145259	7.2732	3.51063e-13	3.98931e-11	370.257	176.114	298.201	171.938	428.762	180.382	383.808	176.021
Ckap2l	24.5314	1.05616	1.30026	0.812266	0.416639	0.674105	2.39527	0.657353	3.46171	1.03111	3.72411	0.367961	0	0.572985
Ccdc158	35.9643	1.05454	0.966836	1.09072	0.275397	0.542708	3.15307	1.32225	4.59206	0.824891	4.15147	1.3083	0.715678	1.83355
Arhgef11	2639.18	1.05432	0.1608	6.55671	5.50093e-11	4.46034e-09	221.761	106.653	196.116	115.949	236.878	105.686	232.289	98.3243
Ckmt1	7374.48	1.05386	0.150212	7.01578	2.28662e-12	2.26739e-10	623.631	294.033	484.922	290.052	799.83	298.048	586.14	293.999
Diap3	38.8863	1.05366	0.814868	1.29304	0.195996	0.454938	3.29068	1.54824	3.53236	1.49511	4.09042	1.71715	2.24927	1.43246
Mll1	6419.04	1.05286	0.163766	6.42903	1.28419e-10	1.00971e-08	541.296	257.475	420.421	266.646	655.871	229.485	547.596	276.294
Il17rb	31.8305	1.05286	0.937295	1.12329	0.261313	0.525869	2.74624	1.21467	2.82588	0.928002	1.22102	1.51273	4.19183	1.20327
Klhl17	453.702	1.0521	0.272771	3.85709	0.000114746	0.00229154	38.0765	18.3812	33.9106	20.4161	42.7968	18.9704	37.522	15.7571
Dpysl5	1949.53	1.04919	0.180326	5.81828	5.94555e-09	3.46668e-07	164.229	78.366	134.018	76.5086	201.835	74.5325	156.836	84.057
Fez1	5760.34	1.04649	0.137894	7.5891	3.22127e-14	4.32317e-12	484.746	232.057	400.357	220.504	585.113	241.259	468.769	234.408
Acly	4835.96	1.04557	0.175169	5.9689	2.38855e-09	1.50322e-07	410.319	191.457	285.344	195.86	563.44	197.963	382.172	180.548
1700010I02Rik	8.26595	1.04468	1.77669	0.587991	0.556539	0.777546	0.751005	0.277592	0.0706471	0.309334	1.15997	0.408845	1.0224	0.114597
Dnttip2	892.436	1.04381	0.26874	3.88408	0.000102719	0.00208931	75.7648	35.2879	106.606	32.0161	71.6129	32.9938	49.075	40.8539
Frmpd3	160.598	1.04333	0.441894	2.36104	0.0182235	0.110575	13.5467	6.43778	11.6568	7.47557	10.9892	6.3371	17.9942	5.50066
Aurka	22.493	1.04322	1.05054	0.993031	0.320695	0.587362	1.90816	0.890819	0.98906	0.618668	1.77048	0.735921	2.96495	1.31787
Capn12	9.78867	1.04302	1.84618	0.56496	0.572101	0.788012	0.890746	0.327334	0	0.515557	1.34312	0.122654	1.32912	0.343791
Ascc3	760.282	1.04295	0.239112	4.36177	1.29016e-05	0.000346894	64.1798	30.428	45.5674	27.5823	82.6631	29.1507	64.3088	34.551
1700086O06Rik	59.5094	1.04284	0.673879	1.54752	0.121739	0.349492	5.02614	2.37908	3.88559	2.11378	6.89877	2.33042	4.29407	2.69303
Ehhadh	109.154	1.04239	0.512216	2.03506	0.041845	0.188224	9.10443	4.47845	8.05377	5.67113	9.03556	3.63872	10.224	4.12549
Mtap1a	48179.2	1.04224	0.362235	2.87724	0.00401174	0.0387437	4096.36	1898.96	2510.23	2017.48	5441.85	1856.32	4337.01	1823.07
Prkag3	20.7032	1.04152	1.11348	0.935374	0.349596	0.616016	1.74371	0.832548	1.41294	0.567113	1.15997	1.18565	2.65823	0.744881
Vps13c	2570.82	1.04099	0.196062	5.30947	1.09942e-07	4.90425e-06	218.691	101.216	131.05	96.9762	285.169	104.337	239.854	102.335
Mapk8ip3	12419.4	1.04059	0.142949	7.27949	3.35082e-13	3.8357e-11	1045.05	500.387	849.673	510.556	1293.85	494.171	991.623	496.435
Copg	7424.05	1.04055	0.157951	6.58782	4.46332e-11	3.70096e-09	626.994	296.838	451.152	292.939	799.83	296.985	630.001	300.588
Gabrg3	153.036	1.03972	0.448561	2.31789	0.0204551	0.119138	12.9824	6.06112	12.0807	6.08357	8.9745	6.25533	17.8919	5.84445
4933405D12Rik	21.7992	1.03966	1.36413	0.76214	0.445976	0.699314	2.23972	0.472915	0	0.412445	1.70943	0.490614	5.00974	0.515687
Hltf	761.929	1.03874	0.26026	3.99115	6.57539e-05	0.00143772	64.3775	30.4352	47.6868	27.9947	89.6229	27.27	55.8229	36.0408
Exd1	73.9085	1.03724	0.632108	1.64092	0.100815	0.314086	6.41614	2.78088	5.58112	3.55734	11.1113	3.06634	2.55599	1.71896
Mir703	129.234	1.03699	0.554325	1.87072	0.0613841	0.2366	11.5391	4.54255	17.1672	6.44446	2.6252	3.51607	14.8248	3.66711
Il13ra1	190.539	1.03652	0.416711	2.48739	0.0128684	0.0870269	16.0252	7.68506	16.7434	7.16624	20.0858	6.95037	11.2464	8.93857
Nol6	2758.32	1.03563	0.175067	5.91561	3.30644e-09	2.04265e-07	231.93	111.309	197.741	114.454	294.693	105.278	203.355	114.196
Myo18b	154.166	1.0356	0.448636	2.30834	0.0209803	0.121291	13.0203	6.16387	10.9503	5.67113	18.1932	5.88737	9.91725	6.93312
Col4a2	381.116	1.03551	0.313882	3.29904	0.00097016	0.0130993	32.0811	15.3441	22.819	17.0134	34.9823	14.3505	38.4421	14.6684
Pcdhb3	65.6809	1.03531	0.684535	1.51242	0.130427	0.362851	5.49669	2.6765	2.75524	2.78401	5.55565	1.34919	8.17917	3.8963
Jak1	3564.51	1.03506	0.179643	5.76176	8.32405e-09	4.74684e-07	301.001	142.559	207.914	145.335	383.462	140.643	311.627	141.699
Dolpp1	190.884	1.03503	0.384089	2.69478	0.0070436	0.0578399	15.985	7.76809	16.0369	8.09424	13.0039	6.50064	18.9143	8.70938
Cpne4	1151.63	1.03416	0.196669	5.25838	1.45331e-07	6.37327e-06	96.6221	46.6846	117.557	46.7095	77.8401	41.9475	94.4695	51.3968
Esyt3	342.504	1.03411	0.297129	3.48035	0.000500764	0.00768826	28.6985	13.9219	32.9216	15.2089	23.6268	12.6333	29.5473	13.9235
Pik3c3	1318.01	1.03409	0.191099	5.4113	6.25686e-08	2.90767e-06	110.515	53.4958	94.2433	53.2055	131.687	51.7598	105.614	55.5223
Tubb4b	7275.31	1.03291	0.141148	7.31791	2.51856e-13	2.94804e-11	610.595	294.728	492.34	293.455	728.461	298.334	610.984	292.394
1110065P20Rik	225.231	1.0321	0.36853	2.80057	0.0051012	0.045641	18.9151	9.11209	17.026	10.4658	15.0796	7.6454	24.6398	9.22506
Hsd17b4	1428.39	1.03155	0.189022	5.45728	4.83475e-08	2.28083e-06	120.015	57.7306	88.7328	54.4944	134.618	62.7168	136.694	55.9807
Nup205	766.602	1.03137	0.264693	3.89648	9.76018e-05	0.00200988	65.632	29.7622	39.2798	27.7885	101.589	30.786	56.0273	30.712
Plekhg1	1818.47	1.03109	0.203661	5.06279	4.13164e-07	1.61206e-05	153.248	73.0387	114.872	70.2188	205.315	67.1324	139.557	81.765
Slc37a1	128.848	1.03099	0.575941	1.7901	0.0734382	0.264144	11.7792	4.25433	12.222	5.4649	2.25889	3.22988	20.8569	4.0682
Zdhhc15	151.441	1.03068	0.49191	2.09525	0.0361484	0.172625	13.1257	5.71934	11.3742	6.03202	6.53246	5.96914	21.4703	5.15687
Pla2g15	161.153	1.02926	0.468152	2.19855	0.0279098	0.146229	13.6112	6.44233	10.1732	7.93958	10.9281	6.45975	19.7323	4.92767
Acad11	310.755	1.02641	0.346945	2.95842	0.00309219	0.0319649	25.9866	12.6831	17.8737	11.4969	27.7782	16.9262	32.3077	9.62615
Ccdc88b	106.457	1.02472	0.530429	1.93187	0.0533756	0.217242	9.01989	4.22737	5.36918	3.96979	9.52396	4.98791	12.1665	3.7244
Ppp1r13l	82.7436	1.02028	0.586729	1.73893	0.0820468	0.279375	6.94244	3.35399	5.08659	3.91823	9.40186	3.39341	6.33886	2.75033
Parp3	53.2731	1.0196	0.711739	1.43255	0.151987	0.396205	4.50417	2.12501	5.65177	1.90756	2.44204	1.71715	5.4187	2.75033
C77370	2725.96	1.01909	0.216538	4.70629	2.52272e-06	8.29536e-05	231.019	108.194	134.653	113.526	304.645	100.985	253.759	110.07
Hsd3b6	15.8013	1.01908	1.5098	0.674977	0.499691	0.738413	1.67556	0.290721	0	0.103111	0.732613	0.367961	4.29407	0.40109
Qrfpr	35.7394	1.01768	0.857124	1.18731	0.235103	0.497489	2.94913	1.4982	3.46171	1.08267	2.6252	1.34919	2.76047	2.06275
1190007I07Rik	90.3953	1.01642	0.622186	1.63363	0.102337	0.316422	7.56845	3.68014	4.09753	5.05246	8.4861	3.63872	10.1217	2.34924
Kbtbd10	29.1903	1.01629	0.942408	1.0784	0.280855	0.548558	2.46943	1.16295	4.16818	1.95912	2.31994	0.899459	0.920157	0.630284
Hspg2	99.535	1.01479	0.611354	1.6599	0.0969344	0.306225	8.97583	3.41008	6.1463	4.17601	2.9915	2.9028	17.7897	3.15142
Eftud2	1781.75	1.0146	0.176211	5.75786	8.5186e-09	4.82246e-07	149.183	72.5341	110.209	67.7442	181.322	79.7248	156.018	70.1334
Mrc2	91.4024	1.01268	0.608051	1.66545	0.0958238	0.304322	7.90516	3.46875	7.27665	4.43379	13.0649	2.82103	3.37391	3.15142
4933403G14Rik	191.718	1.01189	0.391093	2.58734	0.00967204	0.0718389	16.0395	7.8175	20.5583	8.1458	13.5533	7.97248	14.0068	7.33421
Gpr101	849.056	1.01149	0.208128	4.85992	1.17431e-06	4.14551e-05	70.5564	35.0982	71.0004	37.945	70.9413	31.7673	69.7275	35.5824
Klhl25	143.802	1.01066	0.577249	1.75083	0.0799753	0.275644	12.6301	5.26431	5.01595	6.08357	9.76817	6.50064	23.1062	3.20872
Irgm2	47.8927	1.01049	0.826501	1.22261	0.221476	0.48223	4.07668	1.88298	6.28759	1.28889	1.64838	2.69838	4.29407	1.66166
Trim36	432.634	1.00924	0.322781	3.1267	0.00176781	0.0210568	36.6908	17.1452	19.6399	17.4774	48.7187	18.8886	41.7138	15.0695
Pkib	481.193	1.00814	0.28851	3.49432	0.000475279	0.00741351	40.2624	19.6162	47.7574	18.4569	44.8115	19.134	28.2181	21.2578
Dctn1	15069.4	1.00793	0.136678	7.37448	1.64993e-13	2.00673e-11	1256.31	618.898	1029.4	635.991	1447.22	599.817	1292.31	620.887
A730082K24Rik	3.43112	1.00767	2.48774	0.405056	0.685436	NA	0.297964	0.128996	0.423883	0.0515557	0.0610511	0.163538	0.408959	0.171896
Sln	2.86845	1.00721	3.8993	0.258305	0.796172	NA	0.329687	0.0272563	0.98906	0	0	0.081769	0	0
Agpat2	17.3858	1.00637	1.44116	0.698305	0.484986	0.728457	1.75686	0.406589	3.7443	0.36089	1.52628	0.572383	0	0.286493
Dhx38	1442.11	1.00557	0.175554	5.72798	1.01634e-08	5.55174e-07	119.952	59.5017	104.487	56.8659	133.397	59.814	121.972	61.8251
4833417C18Rik	23.0485	1.00415	1.33446	0.752479	0.451763	0.704009	2.28304	0.585055	2.33135	0.773335	4.51778	0.408845	0	0.572985
1700021C14Rik	8.577	1.00406	1.66602	0.602672	0.546727	0.771034	0.713856	0.353447	0.777118	0.618668	1.15997	0.327076	0.204479	0.114597
Vwa5b2	450.493	1.0039	0.293727	3.4178	0.00063129	0.00925417	37.6301	18.4283	27.1285	20.1067	42.0031	18.5616	43.7586	16.6166
Ltn1	1138.52	1.00216	0.236614	4.23542	2.28121e-05	0.000574797	96.7264	44.9487	60.262	42.121	149.148	47.0581	80.7693	45.6669
Vim	849.347	1.00025	0.227461	4.39748	1.09517e-05	0.000299642	70.6231	35.0678	56.659	35.8312	74.5433	39.0038	80.6671	30.3682
Baz1b	4872.91	0.999865	0.158015	6.32768	2.48879e-10	1.87176e-08	407.905	198.469	280.116	186.271	497.322	208.879	446.276	200.258
Tubb2a	4575.33	0.999196	0.140672	7.103	1.22074e-12	1.25857e-10	380.585	188.759	319.819	182.816	445.795	193.629	376.14	189.83
2310021P13Rik	2107	0.998639	0.176834	5.64733	1.62956e-08	8.54177e-07	175.745	86.4443	135.077	86.7682	215.693	87.5337	176.466	85.031
Atp6v0a1	6349.33	0.997901	0.132994	7.50335	6.22083e-14	8.01542e-12	526.955	263.142	464.152	266.904	548.055	247.433	568.657	275.09
Btbd8	60.7455	0.997584	0.665729	1.49848	0.134008	0.368593	5.07563	2.4834	5.15724	2.16534	6.59351	2.82103	3.47615	2.46384
Trmt61a	265.585	0.997065	0.355503	2.80466	0.00503702	0.0452982	22.1255	10.9233	17.6618	11.3423	28.2666	9.56698	20.4479	11.8608
Exph5	160.272	0.996112	0.427888	2.32797	0.0199136	0.117054	13.4775	6.46639	9.18412	5.0009	20.5132	7.80894	10.7352	6.58933
Cd151	193.635	0.995487	0.417431	2.38479	0.0170887	0.10616	16.0534	8.04212	21.9006	8.76447	11.8439	9.97582	14.4158	5.38606
Rai1	2878.8	0.994037	0.14387	6.90928	4.87124e-12	4.62412e-10	238.56	119.671	241.189	125.177	222.47	114.885	252.021	118.952
Dock3	6415.62	0.99375	0.183036	5.42925	5.65902e-08	2.64564e-06	537.037	261.309	354.931	280.257	665.029	249.723	591.15	253.947
Pex5	946.994	0.992571	0.242864	4.08694	4.37092e-05	0.0010081	79.3417	38.5001	52.2789	39.9041	102.932	36.0601	82.8141	39.536
Nup62-il4i1	11.7211	0.99238	1.72709	0.574597	0.565564	0.784802	1.20275	0.255807	0.847765	0.309334	0	0.286192	2.76047	0.171896
Trank1	6143.78	0.991451	0.165915	5.97565	2.29173e-09	1.45031e-07	512.644	251.874	366.447	258.655	626.14	241.873	545.346	255.093
Fam46c	48.6945	0.991272	0.780678	1.26976	0.204171	0.464834	4.26354	1.79589	2.04877	1.80445	2.8694	1.92157	7.87245	1.66166
Nbr1	2951.97	0.991199	0.178239	5.56106	2.68145e-08	1.35096e-06	246.631	120.706	168.705	119.867	290.847	124.33	280.341	117.92
Cpsf1	939.615	0.98984	0.262202	3.77511	0.000159939	0.00301079	78.6785	38.2451	48.6052	43.3068	92.8587	37.164	94.5717	34.2645
Wdfy3	9200.67	0.989182	0.188244	5.25479	1.48193e-07	6.48051e-06	771.293	373.618	488.737	398.989	997.818	342.49	827.323	379.374
Top2b	2825.14	0.988221	0.198054	4.98964	6.04917e-07	2.29692e-05	236.353	115.202	157.26	122.445	304.889	110.225	246.909	112.935
Scaf11	3228.24	0.987778	0.179368	5.50698	3.6505e-08	1.75404e-06	270.214	131.502	174.922	124.249	338.406	129.072	297.313	141.184
Decr1	353.421	0.98773	0.32364	3.05194	0.00227369	0.0255573	29.6991	14.2799	26.1394	14.0747	42.9189	14.5549	20.039	14.21
Ccdc164	545.122	0.987326	0.253554	3.89395	9.86257e-05	0.00202293	45.3323	22.5014	53.4092	23.7672	34.4328	21.5053	48.1549	22.2318
Nfrkb	764.045	0.986829	0.233724	4.22219	2.41941e-05	0.000602645	63.5147	31.5613	47.9694	32.4285	78.5727	34.4656	64.002	27.7898
Acsm2	26.2938	0.984964	0.973188	1.0121	0.31149	0.57998	2.1756	1.09634	2.11941	1.03111	1.95363	1.22654	2.45375	1.03137
Ppp4r4	795.205	0.983581	0.217105	4.53044	5.88614e-06	0.000175768	65.7996	33.1539	57.7187	33.8721	72.4065	32.0126	67.2737	33.5769
Flna	683.293	0.982851	0.263612	3.7284	0.0001927	0.00350133	57.0172	28.0103	38.0081	29.3867	70.575	25.5937	62.4684	29.0504
Drd1a	84.0655	0.982463	0.644608	1.52413	0.127477	0.358686	7.33695	3.12397	3.95624	3.35112	4.45673	3.55695	13.5979	2.46384
Arrdc1	139.361	0.980894	0.447406	2.1924	0.0283505	0.147662	11.5761	5.76575	15.1891	6.54757	10.4397	5.76472	9.09933	4.98497
Zfp712	174.953	0.980648	0.407756	2.40499	0.016173	0.101936	14.3726	7.39817	12.4339	5.4649	14.5302	9.28078	16.1539	7.44881
Il16	45.9461	0.978795	0.754241	1.29772	0.194383	0.453221	3.80037	1.91706	3.32041	2.21689	3.47991	1.75803	4.60079	1.77625
Incenp	425.47	0.978675	0.283414	3.45316	0.000554058	0.00836622	35.1728	17.7718	28.4001	13.6623	32.235	20.9738	44.8832	18.6793
Sncg	1855	0.978115	0.161819	6.0445	1.49878e-09	9.76274e-08	152.972	77.8599	143.696	67.2286	171.676	88.3105	143.545	78.0406
Mre11a	270.649	0.978027	0.372299	2.62699	0.00861441	0.0664235	22.7805	10.8985	20.0638	10.3111	34.0665	10.7526	14.2113	11.6316
Six3os1	197.174	0.977914	0.396839	2.46426	0.0137296	0.0908768	16.2398	8.29618	18.7921	7.06313	14.5912	10.262	15.336	7.56341
S100a11	80.2853	0.976971	0.578685	1.68826	0.0913614	0.29663	6.63726	3.35326	7.06471	3.35112	7.32613	3.27076	5.52094	3.43791
Plxdc1	306.124	0.974539	0.342743	2.84335	0.00446419	0.0417408	26.0042	12.0892	43.1654	14.1778	16.2396	10.63	18.6076	11.4597
Mtor	3457.15	0.973719	0.197836	4.92184	8.57331e-07	3.14786e-05	290.145	140.054	186.014	142.345	415.941	138.639	268.481	139.178
Apex2	112.538	0.972964	0.525305	1.85219	0.0639985	0.24345	9.43091	4.57301	4.30947	3.6089	13.2481	6.78683	10.7352	3.32332
Ache	1694.54	0.971726	0.185932	5.22624	1.72993e-07	7.41915e-06	140.034	70.8311	117.981	75.0135	165.937	66.0285	136.183	71.4513
Skiv2l	1143.41	0.971588	0.207861	4.67422	2.95073e-06	9.51075e-05	94.9318	47.3521	67.6799	46.297	110.991	49.3476	106.125	46.4118
Plekhh3	229.737	0.971558	0.384301	2.52812	0.0114675	0.0804148	19.2379	9.35001	14.3414	10.7236	29.3656	9.93494	14.0068	7.39151
Cdca3	19.1562	0.969826	1.27943	0.758017	0.448441	0.701218	1.89037	0.493386	4.59206	0.670224	0.976817	0.408845	0.10224	0.40109
Pim1	86.4363	0.969739	0.563212	1.7218	0.0851056	0.285544	7.19476	3.56117	5.43983	3.55734	6.22721	3.22988	9.91725	3.8963
Pskh1	279.928	0.969361	0.335118	2.8926	0.0038207	0.0375036	23.1871	11.6465	26.8459	11.9094	25.6414	11.5703	17.074	11.4597
Prr7	392.311	0.968481	0.281689	3.43812	0.000585771	0.00871813	32.2698	16.5485	32.427	18.6632	31.5634	15.4543	32.8189	15.5279
Lrrc7	1782.04	0.967624	0.173966	5.56214	2.66483e-08	1.34695e-06	146.83	74.9236	127.165	74.7042	161.907	68.3589	151.417	81.7077
Gbp5	34.3337	0.967214	0.911815	1.06076	0.2888	0.556097	3.04845	1.22397	0.635824	0.824891	3.60201	1.47184	4.9075	1.37516
Heatr7b1	2.93364	0.967112	3.8713	0.249816	0.80273	NA	0.345956	0.0190995	0	0	1.03787	0	0	0.0572985
Smarca2	9731.63	0.965326	0.135797	7.10858	1.17242e-12	1.21682e-10	804.282	406.699	625.792	393.009	885.301	403.367	901.754	423.723
Unc45a	781.239	0.965278	0.219285	4.40193	1.0729e-05	0.000294585	64.5178	32.6979	56.447	32.6347	59.0974	31.7673	78.0089	33.6915
Tppp3	3122.35	0.964225	0.144748	6.6614	2.71229e-11	2.32005e-09	256.839	131.699	269.448	123.888	248.844	133.12	252.225	138.089
G630071F17	21.0556	0.96403	1.08884	0.885369	0.375958	0.639592	1.76726	0.852848	1.48359	0.979558	1.15997	0.776806	2.65823	0.80218
Vat1	6439.33	0.964013	0.129932	7.41935	1.17694e-13	1.48964e-11	530.803	270.493	616.184	283.041	473.207	266.24	503.019	262.198
Pstpip1	52.6531	0.963236	1.15527	0.833778	0.404406	0.664043	4.78453	1.76751	7.91248	1.23734	0	2.86192	6.4411	1.20327
4632427E13Rik	23.9284	0.963196	1.02781	0.937139	0.348687	0.615112	1.98481	0.992787	1.83682	1.03111	2.68625	0.858575	1.43136	1.08867
Nudt8	105.378	0.962967	0.511763	1.88166	0.0598816	0.232943	8.65326	4.45972	9.25477	3.81512	8.7303	4.57907	7.97469	4.98497
Card11	36.4035	0.962592	1.04576	0.92047	0.357327	0.622547	3.73415	0.795821	1.41294	0.824891	9.58502	0.81769	0.204479	0.744881
Usp9x	10210.3	0.95932	0.180069	5.32753	9.95593e-08	4.47959e-06	856.274	414.27	485.275	385.482	1171.87	416.531	911.671	440.798
Trappc9	2122.72	0.957451	0.204784	4.67543	2.93343e-06	9.47463e-05	176.007	88.1392	118.405	95.0171	212.397	84.1403	197.22	85.2602
Serpinb7	5.75363	0.957315	2.98528	0.320679	0.748454	0.88682	0.681598	0.0343705	0	0.103111	0	0	2.04479	0
Ctnnb1	6673.08	0.957086	0.14185	6.74715	1.50773e-11	1.34727e-09	550.537	279.846	448.397	277.576	670.035	286.069	533.18	275.892
Pgd	529.944	0.956507	0.266828	3.58474	0.000337419	0.0056544	43.8106	22.1344	35.3942	22.9938	56.7775	21.7506	39.26	21.6588
Huwe1	13928	0.955619	0.1664	5.74292	9.3059e-09	5.13738e-07	1156.08	577.082	763.201	586.497	1395.57	553.944	1309.49	590.805
Tnfsf15	4.81901	0.955268	2.11153	0.452406	0.650976	0.83624	0.410958	0.188709	0.211941	0.206223	0.305255	0.245307	0.715678	0.114597
Tymp	17.5428	0.954307	1.28506	0.742619	0.457713	0.708935	1.47139	0.711594	0.353236	1.18578	1.70943	0.490614	2.35151	0.458388
Cd63	513.323	0.953249	0.260663	3.65701	0.000255174	0.00446857	42.2716	21.6052	43.0947	20.9316	49.8787	21.9959	33.8413	21.888
Dlec1	55.3797	0.953217	0.727706	1.30989	0.190232	0.44736	4.79968	2.09164	8.97218	2.21689	2.56414	1.88069	2.86271	2.17734
Cdh13	958.942	0.952952	0.205211	4.64375	3.42135e-06	0.00010848	78.9842	40.3444	97.7756	42.3272	66.4846	36.5916	72.6924	42.1144
Gtf3c3	700.977	0.95261	0.234194	4.06761	4.74978e-05	0.00108106	57.9432	29.2848	40.7634	26.3965	70.0866	30.1728	62.9796	31.285
Gtf2h4	120.724	0.952436	0.523147	1.82059	0.0686691	0.253868	10.0256	4.99697	6.42889	6.39291	14.9575	4.70172	8.69037	3.8963
Chd6	4251.38	0.952373	0.182939	5.20595	1.93005e-07	8.19057e-06	352.73	176.301	232.853	181.167	439.69	170.284	385.648	177.454
Wdr7	5073.02	0.952247	0.157615	6.04161	1.52585e-09	9.8566e-08	418.021	213.254	327.732	224.577	494.88	210.514	431.451	204.67
Ankrd2	43.195	0.951696	1.08931	0.873668	0.382299	0.645112	4.16377	1.21132	7.91248	1.90756	4.57883	0.695037	0	1.03137
Nxn	497.762	0.951539	0.289447	3.28744	0.00101104	0.0135571	41.4625	20.4779	47.051	22.0658	25.092	19.829	52.2445	19.5388
Lonp2	2362.84	0.95064	0.171209	5.55252	2.81577e-08	1.39605e-06	194.86	99.1667	148.076	98.8323	234.375	103.438	202.128	95.2302
Acads	181.767	0.950485	0.435755	2.18124	0.029166	0.150305	15.1165	7.50223	8.97218	8.40358	21.2458	8.25867	15.1315	5.84445
Irf9	243.391	0.950361	0.36099	2.63265	0.00847208	0.0657822	20.2886	9.99852	17.5205	10.8782	30.7697	11.6112	12.5755	7.50611
Cdc42bpb	6686.76	0.949557	0.135939	6.98514	2.84564e-12	2.80385e-10	549.021	283.065	475.738	292.991	595.919	282.43	575.405	273.772
Pcdhga5	79.8605	0.94862	0.579953	1.63568	0.101906	0.315653	6.56977	3.36789	6.64083	3.76357	8.05874	3.47518	5.00974	2.86493
Ets2	1645.93	0.948353	0.174117	5.44663	5.13323e-08	2.41432e-06	135.106	69.7099	149.065	72.4357	141.028	65.9876	115.224	70.7064
Cyfip1	1041.19	0.946304	0.200043	4.7305	2.23973e-06	7.49852e-05	85.3206	44.243	78.5596	48.3077	94.6902	42.7652	82.7119	41.656
Dock4	2430.05	0.945395	0.218021	4.33625	1.44933e-05	0.000382425	202.252	100.138	119.606	104.916	260.077	90.9272	227.074	104.57
Crnkl1	631.389	0.945287	0.242034	3.9056	9.39932e-05	0.00195627	52.0748	26.4939	39.7037	23.6125	49.4514	28.2512	67.0692	27.6179
Snora7a	26.1299	0.944513	1.27971	0.738067	0.460474	0.710795	2.53543	0.71611	0	0.257778	4.33462	0.286192	3.27167	1.60436
Adam33	9.34751	0.944466	1.88434	0.501218	0.616218	0.816294	0.729138	0.434046	1.27165	0.36089	0.915766	0.081769	0	0.859478
Sphkap	2199.42	0.944006	0.176433	5.35051	8.7709e-08	3.99255e-06	181.063	92.6283	146.875	96.8216	228.026	93.3393	168.287	87.7241
Pcsk1	420.853	0.943734	0.292744	3.22375	0.00126525	0.0161455	34.8362	17.5337	22.7484	16.6525	40.66	17.4986	41.1003	18.4501
Mon2	1979.36	0.943681	0.16518	5.71305	1.10969e-08	5.95886e-07	162.223	84.084	142.707	86.562	173.324	86.389	170.638	79.3012
Enc1	4103.1	0.942778	0.158691	5.94096	2.83364e-09	1.77165e-07	336.602	173.979	278.703	186.632	382.363	161.289	348.74	174.016
Actn3	30.9717	0.942612	1.05842	0.890587	0.373151	0.637273	2.83655	1.0175	0.211941	0.515557	5.12829	0.531499	3.16943	2.00545
Hydin	129.905	0.941951	0.561104	1.67875	0.0932013	0.299785	11.2845	4.88061	17.9444	4.22757	12.6376	5.60118	3.27167	4.81308
Rab3b	995.284	0.941743	0.246146	3.82595	0.000130271	0.00252875	82.726	41.1249	99.6124	38.5121	100.002	43.3785	48.5638	41.4841
2900041M22Rik	23.5209	0.940943	1.44838	0.64965	0.515918	0.749586	2.26991	0.656968	4.66271	0.154667	0	0.899459	2.14703	0.916777
Madd	5085	0.940942	0.164476	5.72084	1.05996e-08	5.74962e-07	416.998	215.768	333.242	241.538	459.104	206.998	458.647	198.769
Cd164l2	35.7083	0.94056	1.20474	0.780713	0.434971	0.690017	3.54754	0.895918	3.17912	0.773335	0	0.940344	7.4635	0.974075
Wdyhv1	239.921	0.938337	0.366904	2.55744	0.0105445	0.0757704	19.79	10.0653	23.2429	10.4142	13.7365	10.3847	22.3905	9.39696
Abcc8	150.423	0.938118	0.526702	1.78112	0.0748933	0.266928	12.743	5.97536	5.15724	7.37246	19.7805	5.39676	13.2912	5.15687
Sorcs2	604.829	0.937084	0.268805	3.48611	0.000490102	0.00756935	49.7948	25.4688	35.8887	27.5307	61.9668	23.2633	51.5288	25.6124
Myoz3	91.4441	0.936961	0.614352	1.52512	0.127229	0.358303	8.04188	3.33722	2.68459	3.19645	6.10511	3.14811	15.336	3.66711
Gipc2	33.6218	0.936594	0.874914	1.0705	0.284395	0.551778	2.76317	1.42065	2.89653	1.856	1.09892	0.572383	4.29407	1.83355
Krt8	12.2415	0.935977	1.66901	0.560797	0.574936	0.789713	1.16854	0.354761	0	0.36089	2.38099	0.531499	1.12464	0.171896
Nme3	481.145	0.935718	0.264862	3.53285	0.000411111	0.00663919	39.4045	20.4681	40.4808	20.4161	44.8115	20.0743	32.9212	20.914
Pcdhb20	118.554	0.935545	0.495799	1.88694	0.0591678	0.231555	9.83155	4.92108	12.0807	4.69157	5.8609	4.45641	11.5531	5.61526
Cckar	104.071	0.93512	0.55426	1.68715	0.0915743	0.297006	8.72589	4.22451	9.81995	4.12445	4.39568	4.53818	11.962	4.0109
Pacrg	179.429	0.934876	0.397647	2.35102	0.018722	0.112578	14.6136	7.71411	13.7762	6.28979	15.7512	9.11725	14.3136	7.7353
Akap11	6125.73	0.934072	0.183279	5.09646	3.46072e-07	1.37151e-05	508.157	254.114	311.059	249.736	658.558	243.018	554.855	269.59
Asns	1586.51	0.934046	0.193997	4.81474	1.47394e-06	5.0766e-05	130.231	67.1911	120.171	68.7237	163.067	63.2892	107.454	69.5604
Hspa9	6228.34	0.933681	0.147687	6.32203	2.58155e-10	1.93219e-08	511.613	263.427	385.875	258.346	597.995	271.514	550.97	260.422
Rusc2	3224.1	0.932669	0.139774	6.67269	2.51153e-11	2.16019e-09	263.29	137.91	262.807	141.984	273.814	136.922	253.248	134.823
Ccdc64b	2.11595	0.932361	3.96182	0.235336	0.813948	NA	0.244204	0.0190995	0	0	0.732613	0	0	0.0572985
Lrp4	193.732	0.932335	0.400505	2.3279	0.0199176	0.117054	15.9551	8.15249	11.1622	8.45513	17.2774	8.09513	19.4255	7.9072
Nisch	13251.9	0.932199	0.154555	6.03149	1.6245e-09	1.04505e-07	1089.04	559.997	819.718	592.994	1351.61	556.929	1095.8	530.069
Hdac6	887.086	0.931493	0.212875	4.37577	1.21006e-05	0.000327054	72.6116	37.7755	60.6859	38.8214	83.9452	38.3497	73.2036	36.1554
Trpm4	113.149	0.930888	0.514407	1.80963	0.0703528	0.257343	9.28556	4.79449	6.07565	5.0009	11.966	5.88737	9.81501	3.49521
Nemf	1418.77	0.92997	0.248578	3.74116	0.000183173	0.00335487	118.474	58.0748	61.3217	59.4953	149.636	61.3268	144.465	53.4022
Calb1	4786.78	0.92774	0.129787	7.14814	8.79588e-13	9.37906e-11	390.391	205.266	403.96	205.501	378.394	197.145	388.817	213.151
Vtcn1	1.95241	0.927546	3.96317	0.234041	0.814953	NA	0.223854	0.0190995	0	0	0.671562	0	0	0.0572985
Tmem180	217.047	0.925527	0.401723	2.30389	0.0212286	0.122312	18.0831	8.92574	11.8687	9.89869	14.4691	7.76806	27.9114	9.11047
Cand1	5253.25	0.925448	0.177381	5.2173	1.81551e-07	7.76478e-06	434.38	219.323	292.55	220.607	598.972	222.78	411.617	214.583
Plcd4	316.999	0.924363	0.348093	2.65551	0.00791891	0.0629952	26.2807	13.166	15.5424	12.9405	35.5928	12.0609	27.707	14.4965
Fdx1l	30.2293	0.924181	0.927253	0.996687	0.318916	0.585759	2.42136	1.34031	2.61394	0.928002	2.50309	1.14477	2.14703	1.94815
Anxa6	1305.49	0.924111	0.195512	4.72662	2.28283e-06	7.61008e-05	106.81	55.6414	88.6621	56.2473	129.733	53.7222	102.035	56.9547
Atp6v0c	5.03568	0.92192	2.29347	0.401976	0.687702	0.854918	0.343022	0.283606	0.0706471	0	0.549459	0.44973	0.408959	0.40109
Dyrk3	147.272	0.920863	0.467596	1.96936	0.0489123	0.20636	12.3218	6.00438	11.3742	6.80535	19.0479	6.05091	6.54334	5.15687
Ndufs1	2784.36	0.9205	0.188395	4.88601	1.02901e-06	3.70825e-05	229.609	116.87	147.37	115.485	286.574	119.383	254.884	115.743
E2f7	30.4164	0.919544	0.978787	0.939473	0.347488	0.613691	2.52865	1.25629	3.603	0.618668	0.915766	1.14477	3.06719	2.00545
Ddx46	2388.73	0.919266	0.149044	6.16777	6.9261e-10	4.70854e-08	194.439	102.81	189.829	97.8011	186.145	101.189	207.342	109.44
Wdr11	1177.04	0.919232	0.242206	3.79526	0.000147491	0.00280359	97.6271	48.8407	64.9247	52.2259	144.325	47.426	83.6321	46.8702
Nf1	6435.12	0.918841	0.188607	4.87173	1.10624e-06	3.94096e-05	531.851	268.921	336.21	275.617	717.167	252.503	542.177	278.643
Mycbp2	11869.1	0.917851	0.40475	2.2677	0.0233475	0.130119	985.781	491.178	575.774	506.535	1390.25	447.645	991.316	519.354
Srpk3	24.0108	0.917344	1.03485	0.886451	0.375374	0.639089	2.0141	0.973758	0.98906	0.876447	3.72411	1.47184	1.32912	0.572985
Rsph3a	45.3532	0.917271	0.811943	1.12972	0.258593	0.52314	3.74546	1.89819	1.83682	2.57778	5.6167	1.79892	3.78287	1.31787
2610019E17Rik	35.495	0.916479	0.877742	1.04413	0.296424	0.563941	2.9973	1.41962	1.201	1.28889	4.21252	1.3083	3.57839	1.66166
AF251705	8.58157	0.916247	2.31655	0.395522	0.692458	0.857446	0.98906	0.078812	2.96718	0.154667	0	0.081769	0	0
Acp6	104.409	0.915889	0.510147	1.79534	0.0725988	0.262586	8.53117	4.46126	6.35824	3.91823	9.82922	4.82437	9.40605	4.64118
Rabggta	505.371	0.915467	0.269346	3.39884	0.000676712	0.00978624	41.2354	21.6519	31.226	21.7049	48.1082	24.8578	44.372	18.3928
Vgll4	159.701	0.915228	0.426732	2.14474	0.031974	0.159814	13.1352	6.73771	10.9503	6.59913	10.2566	6.3371	18.1987	7.27691
Srpx2	20.2437	0.914628	1.10064	0.831	0.405974	0.665047	1.61699	0.90209	1.62488	0.979558	0.976817	0.408845	2.24927	1.31787
Ccdc163	31.462	0.914272	0.939993	0.972637	0.330734	0.597066	2.63958	1.27548	1.13035	1.49511	4.33462	1.47184	2.45375	0.859478
Capn2	1720.45	0.912996	0.177676	5.13856	2.76859e-07	1.13425e-05	140.06	74.0295	119.182	78.6224	148.354	71.0982	152.644	72.3681
Gucy1b3	2055.09	0.91288	0.187586	4.86645	1.13618e-06	4.02003e-05	168.716	87.0157	135.148	78.9318	232.055	89.2918	138.944	92.8236
Cd93	30.2653	0.912775	1.04576	0.872832	0.382755	0.645303	2.65929	1.10685	1.90747	0.670224	0.549459	1.67626	5.52094	0.974075
Htatip2	169.697	0.912072	0.410256	2.22318	0.0262039	0.140514	13.7938	7.32295	13.9175	6.54757	12.3323	7.97248	15.1315	7.44881
Jun	1909.64	0.910934	0.158476	5.7481	9.02493e-09	5.01786e-07	155.288	82.3433	178.949	91.3567	138.464	76.6585	148.452	79.0147
Azi1	969.833	0.910077	0.211138	4.31035	1.62999e-05	0.000422223	79.2061	41.4778	65.5605	39.7494	100.49	42.111	71.5678	42.5728
Ythdc2	720.393	0.909075	0.244288	3.72133	0.000198176	0.00358996	58.9652	30.6789	43.9425	32.1192	76.6191	31.4402	56.3341	28.4774
Heatr5b	1577.3	0.908447	0.202343	4.48964	7.13448e-06	0.000207995	129.584	66.6918	86.896	63.2588	169.661	66.1103	132.196	70.7064
Sdf2	372.684	0.906669	0.300244	3.01977	0.00252969	0.0277535	30.4273	15.9486	22.6071	16.0854	31.8686	14.8002	36.8063	16.9604
Gulo	12.9925	0.90596	1.63714	0.553381	0.580002	0.792834	1.25287	0.36389	0	0.412445	0.793664	0.163538	2.96495	0.515687
Aebp1	282.048	0.905651	0.361583	2.50469	0.012256	0.0843007	23.5332	11.5643	13.2817	10.5174	20.8184	12.1427	36.4996	12.0327
Chd8	3756.51	0.90527	0.179664	5.03867	4.6877e-07	1.80193e-05	308.456	158.995	211.659	158.792	410.263	157.814	303.447	160.379
Lmtk3	2192.9	0.905017	0.178986	5.05635	4.27356e-07	1.65912e-05	178.482	94.3977	144.756	99.7087	210.443	87.452	180.249	96.0323
Taf1	3387.82	0.90421	0.176327	5.12802	2.92804e-07	1.19017e-05	278.012	143.561	197.883	138.53	375.952	144.322	260.2	147.83
Npw	6.92047	0.903862	2.10331	0.429733	0.66739	0.844161	0.725057	0.136111	0.282588	0.154667	1.89258	0.081769	0	0.171896
Sorbs2	1723.66	0.903842	0.185684	4.86764	1.12941e-06	4.00515e-05	140.607	73.8818	105.759	73.2606	166.791	72.1203	149.27	76.2644
Kif21b	2728.84	0.903519	0.155143	5.82379	5.75272e-09	3.39236e-07	221.284	118.287	208.55	130.436	245.608	114.64	209.694	109.784
Oprd1	94.842	0.902972	0.568994	1.58696	0.112521	0.33402	7.72405	4.07787	5.01595	5.0009	8.8524	3.10722	9.30381	4.12549
Slc11a1	25.0052	0.902906	1.06202	0.850174	0.395228	0.655997	2.11521	0.996387	3.17912	0.567113	0.610511	0.81769	2.55599	1.60436
Irak4	70.9003	0.902219	0.645347	1.39804	0.162102	0.410693	5.93087	2.8918	6.85277	2.47467	8.4861	3.67961	2.45375	2.52114
Tspan31	367.834	0.901766	0.315298	2.86005	0.00423576	0.0402332	30.222	15.5504	42.8828	16.0854	26.313	14.3505	21.4703	16.2155
Iqgap1	547.306	0.901627	0.312104	2.88887	0.00386631	0.037832	46.3637	21.7418	27.2698	22.8907	82.7852	23.9992	29.0361	18.3355
Cgnl1	691.968	0.901415	0.222004	4.06036	4.89966e-05	0.0011103	56.0845	30.0225	54.3983	28.7165	59.4637	30.5816	54.3915	30.7693
Son	7421.81	0.901374	0.191998	4.69471	2.66987e-06	8.71372e-05	615.277	308.277	333.525	298.714	827.608	320.371	684.699	305.745
2410076I21Rik	17.624	0.901012	1.31755	0.683855	0.494067	0.735057	1.61219	0.580898	2.26071	0.515557	0.122102	0.654152	2.45375	0.572985
Pir	97.7344	0.900986	0.697344	1.29203	0.196348	0.455484	8.58944	3.5724	1.48359	4.43379	10.0734	2.9028	14.2113	3.38061
Gstm6	254.288	0.89985	0.357708	2.5156	0.011883	0.0824648	20.9403	10.7028	28.6121	11.5485	12.9428	9.73051	21.2659	10.8294
Tacc3	109.21	0.899332	0.500386	1.79727	0.072292	0.261983	8.87653	4.7133	10.1732	4.84623	9.40186	4.82437	7.05454	4.46929
Celf6	2974.9	0.899065	0.148495	6.05453	1.4083e-09	9.29e-08	241.655	128.536	280.822	135.849	202.14	122.899	242.001	126.859
Pcdhga3	93.5921	0.898962	0.627202	1.43329	0.151775	0.396042	7.7765	3.86989	3.24977	5.15557	12.8207	4.04757	7.25902	2.40654
Adck5	148.489	0.898193	0.458693	1.95816	0.0502115	0.209209	11.999	6.47859	12.0807	5.72268	14.408	5.51941	9.50829	8.19369
Wbscr27	257.146	0.897899	0.347475	2.58407	0.00976421	0.0722477	20.9761	11.0226	22.6777	10.5689	15.2017	10.7526	25.0487	11.7462
Cacna1h	702.945	0.897703	0.240669	3.73002	0.000191462	0.00348618	57.2224	30.2505	45.9913	32.0676	54.8238	29.2324	70.8521	29.4514
Plcg1	1422.24	0.897503	0.193828	4.6304	3.64966e-06	0.000115016	115.677	61.3034	96.5746	63.8259	142.798	59.4052	107.658	60.6792
Oaz1	127.883	0.897154	0.486363	1.84462	0.065093	0.246274	10.4325	5.48096	11.7274	5.25868	12.5155	5.11056	7.05454	6.07365
Thbs3	104.637	0.896666	0.534388	1.67793	0.0933607	0.300111	8.81439	4.20637	3.7443	3.1449	8.18084	4.37464	14.518	5.09957
1300001I01Rik	2891.11	0.895571	0.174937	5.11938	3.0654e-07	1.23953e-05	235.552	124.211	177.819	128.013	291.336	120.855	237.503	123.765
Aldh18a1	562.822	0.895373	0.244676	3.65942	0.000252783	0.00443167	45.6146	24.4217	43.0947	25.0045	52.1376	24.3672	41.6115	23.8935
Scrib	810.686	0.894229	0.211389	4.23026	2.33422e-05	0.000584231	65.5834	35.2965	55.1754	31.1912	69.5982	33.7297	71.9767	40.9685
4930511M11Rik	1.72262	0.893987	3.88992	0.229822	0.81823	NA	0.162803	0.0515557	0	0.154667	0.488408	0	0	0
Tubb3	8798.21	0.893224	0.125472	7.11893	1.08769e-12	1.13646e-10	712.577	382.253	658.078	377.078	801.6	384.233	678.054	385.447
Gaa	8615.6	0.893131	0.125059	7.14167	9.22033e-13	9.76477e-11	696.146	375.961	693.472	416.879	655.261	332.718	739.704	378.285
Vcp	7758.01	0.893021	0.133559	6.68634	2.28826e-11	1.99014e-09	629.063	336.326	541.016	331.194	728.339	333.822	617.834	343.963
Kri1	724.754	0.892801	0.224737	3.97265	7.10781e-05	0.00153687	58.9106	31.2762	44.7903	27.9947	61.6005	33.1165	70.3409	32.7175
Clip1	3474.61	0.892663	0.143192	6.23401	4.5465e-10	3.21727e-08	281.676	150.697	240.483	144.975	281.262	150.005	323.282	157.113
Ap3d1	6106.41	0.891959	0.157933	5.64771	1.62595e-08	8.54177e-07	495.938	263.931	393.01	284.02	596.896	256.06	497.907	251.712
Fstl4	125.486	0.890908	0.473946	1.87977	0.0601401	0.233656	10.1278	5.48736	9.39607	5.82579	11.1723	4.61995	9.81501	6.01635
Rnf112	1756.72	0.890556	0.161464	5.51549	3.47809e-08	1.67637e-06	142.021	76.5808	138.186	74.2402	138.097	75.7999	149.781	79.7023
Ltbp1	90.9457	0.890283	0.585477	1.52061	0.128358	0.359576	7.46977	3.84731	10.8797	3.04179	4.88408	4.37464	6.64558	4.12549
Rab3gap1	3653.28	0.888913	0.168984	5.26035	1.43778e-07	6.32297e-06	298.408	156.199	212.648	149.924	396.099	161.044	286.476	157.628
Spnb4	4026.36	0.888514	0.169736	5.23468	1.65267e-07	7.12709e-06	327.535	173.496	240.483	181.373	395.428	173.923	346.695	165.192
C1rl	3.73988	0.88845	2.63861	0.336712	0.736334	0.88017	0.319473	0.14591	0	0.257778	0.549459	0.122654	0.408959	0.0572985
Cldn2	17.6208	0.887516	1.49806	0.592443	0.553554	0.775883	1.70971	0.482987	3.39106	0.36089	0	0.572383	1.73807	0.515687
Rfc1	1016	0.887263	0.196012	4.52657	5.99474e-06	0.000178103	82.1063	44.3227	81.2442	43.4099	77.0464	46.2404	88.0284	43.3177
Acaca	3080.56	0.887054	0.16955	5.23183	1.67844e-07	7.21822e-06	249.707	133.631	211.306	140.953	304.095	123.512	233.72	136.428
BC029722	1122.26	0.886449	0.218391	4.05899	4.92847e-05	0.00111521	91.6115	48.0395	82.5865	49.6997	124.361	47.5487	67.8871	46.8702
Tubb2b	1151.42	0.885805	0.189546	4.6733	2.96395e-06	9.53364e-05	93.2942	49.9861	73.3317	45.369	101.039	51.4736	105.511	53.1157
Alox15	4.74074	0.885367	3.21971	0.274984	0.783329	0.903591	0.49453	0.0953972	1.48359	0	0	0.286192	0	0
Ror2	37.1905	0.884876	0.855828	1.03394	0.301163	0.569063	3.14143	1.48647	3.88559	1.90756	4.82303	1.92157	0.715678	0.630284
Slco1c1	35.6565	0.883883	0.896636	0.985778	0.324242	0.591077	3.06177	1.37525	1.201	1.08267	2.25889	1.8398	5.72542	1.20327
Hsp90ab1	49476.4	0.883006	0.126642	6.97247	3.11428e-12	3.03019e-10	4006.9	2149.83	3247.51	2139.92	4660.39	2214.22	4112.8	2095.35
Pla2r1	17.9809	0.882731	1.43427	0.615455	0.538254	0.764741	1.83492	0.402589	4.38012	0.618668	0	0.245307	1.12464	0.343791
Gabrq	310.381	0.881334	0.329927	2.6713	0.00755585	0.0607276	25.1276	13.4955	19.9931	14.2809	30.6476	11.9383	24.742	14.2673
Tmem43	329.621	0.880307	0.35633	2.47048	0.0134931	0.0897693	27.0843	13.933	15.0478	14.6934	35.2265	12.2654	30.9786	14.8403
Tle4	1757.17	0.880269	0.202005	4.35766	1.31463e-05	0.000352256	143.773	74.885	205.654	76.1477	114.532	72.2429	111.135	76.2644
Scfd1	868.246	0.87862	0.282614	3.1089	0.00187784	0.0220635	72.3753	35.6673	31.7912	33.769	90.6608	33.8115	94.6739	39.4214
Pnkp	349.354	0.878601	0.336705	2.60941	0.00906998	0.0690134	28.575	14.8978	19.7812	15.5698	25.7635	15.945	40.1802	13.1787
Fhod3	1472.82	0.878385	0.173071	5.07528	3.86918e-07	1.51345e-05	118.922	64.3521	98.8353	55.9895	140.356	69.6263	117.576	67.4404
2410006H16Rik	489.717	0.878187	0.254391	3.45212	0.000556201	0.00838232	39.4632	21.4761	37.1604	20.2098	40.5379	23.018	40.6914	21.2005
Exoc2	845.191	0.877791	0.218081	4.02506	5.69602e-05	0.00126679	68.1725	37.0011	57.86	37.017	75.7033	33.3618	70.9543	40.6247
Nop58	977.532	0.877699	0.21382	4.10485	4.04585e-05	0.000949951	78.9445	42.6973	79.3367	39.2339	92.3702	42.5608	65.1267	46.2972
Dnahc1	579.215	0.877547	0.251653	3.48713	0.000488241	0.00756312	46.6752	25.4011	51.5017	29.0774	50.184	21.6279	38.3399	25.4978
Fam46a	635.02	0.87736	0.249225	3.52036	0.000430959	0.00686711	51.1879	27.8325	49.241	32.2739	60.2574	24.4081	44.0653	26.8157
Tssk1	2.1878	0.876827	3.87687	0.226169	0.82107	NA	0.203504	0.0687409	0	0.206223	0.610511	0	0	0
Galnt12	24.5819	0.876531	1.00212	0.874679	0.381749	0.644847	1.98463	1.07428	2.26071	1.18578	1.64838	1.063	2.04479	0.974075
Kdm6b	2328.37	0.876246	0.14968	5.85411	4.79579e-09	2.86057e-07	187.621	102.117	212.577	114.815	163.8	90.5183	186.485	101.017
Rilpl2	250.094	0.875704	0.386161	2.26772	0.0233465	0.130119	20.7664	10.3546	25.9275	10.0534	9.58502	9.32167	26.7868	11.6889
Arhgap28	55.0931	0.875475	0.784695	1.11569	0.264556	0.530611	4.66122	2.19445	1.97812	2.52623	3.72411	2.73926	8.28141	1.31787
Dfna5	260.668	0.874889	0.335441	2.60818	0.00910264	0.0691927	21.0256	11.4113	18.2976	11.1876	21.6731	11.5294	23.1062	11.517
Fsd1	625.521	0.87366	0.255091	3.42489	0.000615042	0.00905007	50.7453	27.0931	62.5227	28.1494	53.7249	25.5119	35.9884	27.6179
Tsc2	1775.35	0.870112	0.190875	4.55854	5.15095e-06	0.000156012	142.44	78.48	125.823	94.6562	150.491	68.9313	151.008	71.8524
Pfkp	4135.46	0.869755	0.161214	5.39505	6.85058e-08	3.16468e-06	335.21	179.397	256.52	178.228	430.532	182.222	318.579	177.74
Gdf5	9.1579	0.869515	1.86976	0.465042	0.641901	0.830928	0.763441	0.376147	1.13035	0.154667	1.15997	0.286192	0	0.687582
Sorl1	1971.08	0.868925	0.227262	3.82345	0.0001316	0.00253679	160.359	84.9175	103.922	94.8109	210.199	73.0197	166.957	86.9219
Hnf1b	101.051	0.868822	0.613364	1.41649	0.156633	0.402919	8.48193	4.09264	9.39607	3.19645	13.187	4.2111	2.86271	4.87038
Ampd2	1454.8	0.868551	0.174113	4.98842	6.08755e-07	2.30576e-05	117.276	63.756	136.561	69.9611	121.003	64.3522	94.265	56.9547
Igf2bp1	2.88782	0.867856	3.20492	0.270789	0.786553	NA	0.222472	0.136882	0.565177	0.206223	0	0.204423	0.10224	0
Timeless	147.435	0.867716	0.445876	1.94609	0.0516435	0.212568	11.7328	6.61366	11.3742	4.48534	12.2713	8.13602	11.5531	7.21962
Arhgef2	1323.1	0.867572	0.242148	3.58282	0.000339901	0.00567767	108.512	56.1316	60.1207	57.6393	131.992	56.9521	133.423	53.8033
Socs2	163.466	0.867141	0.451409	1.92097	0.0547359	0.220266	13.3054	7.03586	8.26571	8.04269	17.6438	6.99125	14.0068	6.07365
Hist1h3c	1.67755	0.866487	3.96517	0.218525	0.82702	NA	0.138096	0.0706552	0.353236	0.154667	0.0610511	0	0	0.0572985
Eif3c	5328.42	0.866267	0.138851	6.23883	4.40851e-10	3.16275e-08	429.604	233.452	353.306	223.752	500.68	237.212	434.825	239.393
1700010I14Rik	38.0608	0.86626	0.823655	1.05173	0.292925	0.560641	3.07759	1.65861	1.90747	1.392	3.23571	1.34919	4.08959	2.23464
Avil	35.9649	0.865936	0.862545	1.00393	0.315412	0.582786	2.86715	1.60824	2.89653	2.52623	4.27357	1.55361	1.43136	0.744881
Slc35b1	330.074	0.864825	0.30205	2.86318	0.00419407	0.0400082	26.5737	14.5	33.4867	16.9618	25.2751	14.9637	20.9591	11.5743
Slc2a6	122.018	0.864478	0.529584	1.63237	0.102601	0.316926	10.2205	4.96312	8.47765	3.91823	4.70093	5.35587	17.483	5.61526
Sik2	722.619	0.864399	0.222852	3.8788	0.000104973	0.00212513	58.2522	31.6689	45.7793	29.0259	65.6909	33.6071	63.2864	32.3737
Egfl8	3.08627	0.863906	3.44714	0.250615	0.802112	NA	0.353236	0.0308134	1.05971	0.0515557	0	0.0408845	0	0
Hemk1	268.58	0.862595	0.366267	2.3551	0.0185179	0.111739	22.003	11.4185	12.6458	11.4454	22.5889	10.5482	30.7741	12.2619
Sf3b5	457.761	0.862425	0.263927	3.26767	0.00108438	0.0142341	36.8425	20.1202	34.7584	20.4676	32.1129	18.5207	43.6563	21.3724
Trim47	53.4591	0.860994	0.818345	1.05212	0.292746	0.560437	4.41114	2.2412	6.28759	1.49511	5.6167	1.96246	1.32912	3.26602
Cidea	95.2608	0.860605	0.53965	1.59475	0.110769	0.330737	7.69499	4.15906	5.72242	4.12445	8.05874	4.45641	9.30381	3.8963
Smc3	2807.48	0.85994	0.173587	4.95394	7.27248e-07	2.7021e-05	227.068	122.288	176.476	117.547	296.159	120.568	208.569	128.75
Uba1	6348.31	0.859657	0.145867	5.89341	3.78303e-09	2.2916e-07	511.112	278.857	410.036	286.34	564.356	279.323	558.944	270.907
Tnxb	83.8815	0.857872	0.752679	1.13976	0.254387	0.518704	6.89281	3.54522	1.69553	5.98046	7.02087	2.24865	11.962	2.40654
Ptger3	57.3368	0.857308	0.724648	1.18307	0.236782	0.499217	4.67754	2.45732	7.27665	2.42312	2.56414	3.22988	4.19183	1.71896
Hs6st2	1059.04	0.85654	0.189919	4.51004	6.48164e-06	0.000190389	84.9494	46.8355	78.0651	45.1112	83.0294	45.2592	93.7538	50.1362
4932438A13Rik	3113.87	0.856436	0.205931	4.15885	3.19855e-05	0.000773215	253.401	134.082	161.499	136.262	343.717	119.587	254.986	146.398
A930005I04Rik	103.667	0.856378	0.574981	1.4894	0.136382	0.372514	8.51593	4.38418	8.90154	4.5369	12.4544	3.51607	4.19183	5.09957
Odz4	2492.57	0.855856	0.178596	4.79215	1.65007e-06	5.63237e-05	200.851	109.319	152.81	115.846	210.809	102.211	238.934	109.899
Stat1	522.065	0.855758	0.306638	2.79078	0.00525818	0.046617	42.6359	22.3287	27.4817	22.1174	62.6994	19.5428	37.7264	25.326
Kcne4	28.6969	0.855587	1.1407	0.750051	0.453224	0.705425	2.86445	0.706538	0.0706471	0.515557	0.854715	0.286192	7.66798	1.31787
Atrx	4351.46	0.855328	0.155385	5.50456	3.70089e-08	1.76735e-06	351.387	190.098	250.656	177.558	412.644	190.072	390.862	202.665
Armc5	311.065	0.854942	0.317965	2.6888	0.007171	0.0586202	24.8582	13.85	23.8787	12.992	24.4204	16.64	26.2756	11.9181
Klf2	67.2927	0.854929	0.666205	1.28328	0.199393	0.459194	5.62835	2.74541	10.1732	3.04179	3.23571	3.18899	3.47615	2.00545
Aqp7	32.5376	0.854384	0.887277	0.962928	0.335584	0.601193	2.58154	1.46736	1.62488	0.876447	3.05255	2.20776	3.06719	1.31787
Shpk	62.0894	0.854371	0.66768	1.27961	0.200682	0.460867	5.03396	2.69231	3.81494	2.78401	4.33462	2.94368	6.9523	2.34924
Prph	527.686	0.85344	0.251106	3.39872	0.000677015	0.00978624	42.1623	23.5017	44.1544	25.2107	40.7211	19.6246	41.6115	25.6697
Wbp7	1783.13	0.853079	0.167298	5.09915	3.41175e-07	1.35842e-05	143.07	78.8184	123.632	78.3131	157.023	79.643	148.554	78.499
Prmt10	533.869	0.852064	0.258845	3.29179	0.000995515	0.0133836	42.9028	23.5307	51.1485	23.1485	42.4915	22.9771	35.0682	24.4665
Mir682	222.605	0.851994	0.362732	2.34883	0.0188327	0.112904	17.8365	9.86405	17.8031	10.6205	16.1785	9.97582	19.5278	8.99587
Myo1d	659.84	0.85159	0.23583	3.61103	0.000304988	0.00519481	53.1277	28.9813	40.1982	27.3761	56.7164	29.3142	62.4684	30.2536
Tmem132a	707.54	0.851117	0.227127	3.74732	0.000178733	0.00329292	56.8467	31.198	54.3983	33.305	47.4367	28.3739	68.7051	31.9153
Utrn	2585.95	0.850896	0.168105	5.06169	4.15546e-07	1.61731e-05	208.051	113.738	166.303	109.607	255.621	110.593	202.23	121.015
Pcdhga6	110.738	0.850841	0.507138	1.67773	0.0933996	0.300174	8.86128	4.91876	10.0319	6.44446	6.53246	4.41553	10.0195	3.8963
Lmna	1237.3	0.850799	0.222395	3.82562	0.000130442	0.00252891	100.522	53.445	108.514	51.9166	63.3099	53.0681	129.742	55.3504
Coro7	664.672	0.850717	0.293651	2.89704	0.00376707	0.0372561	54.4535	28.2567	32.639	30.3147	81.4421	25.9208	49.2795	28.5347
Fam189b	279.43	0.850492	0.377379	2.25368	0.0242161	0.133395	23.013	11.7586	34.3345	12.6311	11.905	12.1018	22.7994	10.5429
6430584L05	72.71	0.850211	0.691575	1.22938	0.218928	0.48058	6.27387	2.77401	5.15724	2.93867	11.7218	2.57572	1.94255	2.80763
Pygb	3419.29	0.849408	0.165941	5.11873	3.07604e-07	1.24061e-05	275.356	150.132	206.078	152.811	330.652	154.625	289.338	142.96
Setd2	3763.05	0.849122	0.173481	4.89461	9.85028e-07	3.57457e-05	304.214	164.051	205.301	160.751	361.056	158.877	346.286	172.526
Mcf2l	2261.39	0.849069	0.180421	4.70604	2.5257e-06	8.29536e-05	182.888	98.5143	133.664	96.0482	245.181	103.52	169.82	95.9751
Usp19	2134.49	0.84852	0.179553	4.72573	2.2929e-06	7.62733e-05	171.562	94.0497	136.702	99.9149	208.367	93.1349	169.616	89.0992
Hcn3	361.462	0.846649	0.301118	2.81168	0.00492831	0.0445551	29.0872	15.8923	37.3723	16.4978	26.3741	14.9637	23.5151	16.2155
Hexdc	256.417	0.846462	0.376726	2.24689	0.024647	0.134917	20.7358	11.1722	13.423	12.4249	26.4962	9.97582	22.2882	11.1159
Immt	2760.92	0.846033	0.177148	4.77584	1.78954e-06	6.08289e-05	222.956	120.607	164.396	117.186	294.266	120.528	210.205	124.109
Msh2	1003.08	0.844993	0.223986	3.77253	0.000161601	0.00303475	80.8435	43.9774	65.8431	43.049	107.267	42.0702	69.4207	46.8129
4933411E08Rik	6.1843	0.843816	2.91633	0.289342	0.77232	0.897901	0.712262	0.0572985	0	0	2.13679	0	0	0.171896
Rptor	2034.04	0.843695	0.193701	4.35566	1.32669e-05	0.000354879	163.921	89.1907	120.807	95.9451	215.144	91.8675	155.813	79.7596
Exosc5	126.883	0.843404	0.473618	1.78077	0.0749501	0.267028	10.244	5.54496	13.8468	6.03202	9.52396	5.2741	7.36126	5.32876
Scnn1a	61.1375	0.84257	0.666539	1.2641	0.206195	0.4666	4.93783	2.66998	6.71148	3.09334	3.29676	2.73926	4.80526	2.17734
Pja2	16952.7	0.842344	0.142638	5.90548	3.51616e-09	2.16362e-07	1362.1	747.466	1041.62	755.085	1618.83	738.824	1425.83	748.491
Dhx29	812.931	0.841808	0.214885	3.91748	8.94802e-05	0.00187487	65.0819	36.0774	55.7406	36.1405	74.7875	37.0823	64.7177	35.0094
D10Bwg1379e	4615.58	0.840864	0.413155	2.03523	0.0418282	0.188224	376.921	197.431	211.306	208.233	525.222	189.704	394.236	194.357
Usp35	532.581	0.840676	0.291758	2.88142	0.00395889	0.038478	43.2975	22.9757	32.3564	24.4374	64.1036	21.9141	33.4324	22.5756
Cenpt	206.479	0.840661	0.372617	2.2561	0.0240643	0.132866	16.439	9.25486	16.5314	10.0018	15.507	7.56363	17.2785	10.1991
Ep300	3229	0.84042	0.146898	5.72112	1.05824e-08	5.74962e-07	258.209	143.601	230.592	143.067	290.481	141.91	253.554	145.825
Tbc1d8b	136.302	0.839233	0.485405	1.72894	0.0838207	0.282939	10.9479	6.01326	7.41795	7.37246	15.2017	6.25533	10.224	4.41199
Tepp	4.06836	0.838912	3.40665	0.246257	0.805483	0.915275	0.468058	0.038199	0	0	1.40417	0	0	0.114597
0610007C21Rik	314.867	0.837516	0.337631	2.48057	0.0131174	0.0882105	25.2862	13.8951	24.1613	12.3218	33.0897	13.4919	18.6076	15.8717
Hdc	823.549	0.836843	0.237185	3.52822	0.00041836	0.00672728	65.6401	36.8404	55.3873	43.9254	74.0549	32.5032	67.4782	34.0926
Mn1	766.462	0.836817	0.227096	3.68487	0.000228823	0.00406194	61.2427	34.1341	60.262	40.8837	76.4359	34.5883	47.0302	26.9303
Tnfrsf23	14.1978	0.836806	1.64764	0.507881	0.611537	0.813362	1.32814	0.438602	0	0.824891	0.610511	0.204423	3.37391	0.286493
Snhg12	280.809	0.836615	0.325784	2.568	0.0102286	0.0742342	22.4753	12.4679	25.5743	12.7858	18.1322	11.6112	23.7196	13.0068
Dlg5	2058.27	0.836473	0.178261	4.69239	2.70028e-06	8.79454e-05	164.897	91.2295	129.355	93.7798	176.193	93.7891	189.143	86.1197
Lamb1	228.913	0.835964	0.413839	2.02002	0.043381	0.192157	18.8706	9.6148	8.90154	9.69247	20.2079	9.81228	27.5025	9.33966
Efr3b	7241.72	0.835748	0.123271	6.77976	1.20374e-11	1.10235e-09	577.861	323.282	579.73	325.78	619.241	329.039	534.611	315.027
Bclaf1	4976.16	0.8357	0.136118	6.13954	8.27603e-10	5.5535e-08	397.549	221.674	345.888	204.831	458.554	224.865	388.204	235.325
Lars	973.22	0.833887	0.21633	3.8547	0.000115873	0.0023068	77.9948	43.1105	59.2729	42.3788	92.9197	40.5983	81.7917	46.3545
Plekha7	641.654	0.833679	0.28103	2.96652	0.00301195	0.0314066	51.6718	28.1742	37.3017	30.8819	47.9861	30.091	69.7275	23.5497
Zfp92	682.688	0.833665	0.222833	3.74121	0.000183137	0.00335487	54.4379	30.5143	53.1266	30.3147	52.626	30.459	57.5609	30.7693
Copb2	2687.3	0.833045	0.16186	5.14671	2.65093e-07	1.09469e-05	215.143	119.258	185.237	115.846	265.938	119.996	194.255	121.931
Cyb5r3	1385.58	0.832705	0.184851	4.50472	6.64594e-06	0.000194481	110.475	61.9431	107.313	58.5673	101.528	68.0727	122.585	59.1894
Morc2a	1164.87	0.832637	0.238735	3.4877	0.000487199	0.00756203	94.1345	50.8195	62.2401	53.9788	127.841	46.8536	92.3224	51.626
Nol3	708.705	0.831786	0.262531	3.16833	0.00153315	0.0187348	57.5587	30.631	75.7337	31.5005	64.2257	31.3993	32.7167	28.9931
Fam92b	19.1572	0.831466	1.18868	0.699486	0.484249	0.728041	1.54297	0.840906	1.69553	0.567113	2.31994	0.695037	0.613438	1.26057
Pi4ka	5220.88	0.831333	0.170546	4.87453	1.09069e-06	3.89446e-05	419.017	230.657	301.31	244.941	502.206	230.384	453.535	216.646
Shank2	2267.42	0.831123	0.166034	5.00574	5.56466e-07	2.1233e-05	180.653	101.5	162.488	109.865	196.768	92.6443	182.702	101.991
A230077H06Rik	50.9646	0.830712	0.791906	1.049	0.294176	0.561685	4.55051	1.79142	2.33135	2.21689	10.1955	2.12599	1.12464	1.03137
Pcdhga4	104.647	0.830418	0.535346	1.55118	0.120859	0.348349	8.59241	4.42962	9.25477	5.0009	4.15147	3.76138	12.371	4.52658
Cela1	23.4216	0.83022	1.39531	0.595009	0.551837	0.774592	2.19429	0.720237	4.02689	0.36089	0	0.940344	2.55599	0.859478
Gemin4	307.967	0.828973	0.316085	2.62263	0.00872541	0.0670766	24.5589	13.7637	21.0528	14.384	27.473	14.1869	25.151	12.7203
S1pr4	7.90388	0.827391	2.11442	0.391308	0.695569	0.858875	0.868444	0.115097	0	0.206223	2.50309	0.081769	0.10224	0.0572985
Mast4	3551.35	0.827378	0.163807	5.05094	4.39644e-07	1.69836e-05	284.859	157.063	219.995	152.553	366.612	157.855	267.97	160.78
L1cam	2153.31	0.827278	0.160171	5.16495	2.40503e-07	9.98439e-06	171.133	96.8206	168.705	102.596	174.362	85.2442	170.331	102.622
Rgag4	2252.92	0.826938	0.183532	4.50569	6.61565e-06	0.000193959	180.361	99.9873	134.371	104.916	199.576	99.472	207.138	95.574
Tln2	3921.17	0.82674	0.200828	4.11666	3.84399e-05	0.000909472	319.027	168.915	192.867	174.155	470.276	175.763	293.939	156.826
Lamb2	107.835	0.826394	0.573064	1.44206	0.149285	0.392247	8.98408	4.43463	3.88559	4.48534	8.24189	5.15145	14.8248	3.66711
Marcksl1-ps4	49.2934	0.825984	0.855197	0.965841	0.334124	0.600363	4.37495	1.75901	7.13536	3.24801	0.366306	0.940344	5.62318	1.08867
Ptprb	131.055	0.825865	0.470966	1.75356	0.0795067	0.27457	10.4502	5.85798	12.2926	5.67113	8.42505	6.74594	10.6329	5.15687
Znfx1	1412.89	0.825182	0.200492	4.11578	3.85871e-05	0.000911062	112.881	62.9351	94.102	66.0428	139.746	58.0151	104.796	64.7473
Foxm1	74.3281	0.824162	0.61379	1.34274	0.179355	0.434546	6.02296	3.22625	9.32542	4.79468	5.983	2.53484	2.76047	2.34924
Trerf1	1146.52	0.824074	0.196216	4.19983	2.67121e-05	0.000655921	91.3228	51.3474	78.277	53.9788	97.1322	50.9012	98.559	49.1621
1110032F04Rik	83.7649	0.823876	0.611795	1.34665	0.178091	0.432802	6.79411	3.62941	8.05377	3.55734	8.8524	3.14811	3.47615	4.18279
Pear1	23.3748	0.823797	1.1505	0.716032	0.473972	0.720937	2.10083	0.807877	2.04877	0.567113	4.15147	1.51273	0.10224	0.343791
Hhatl	49.3232	0.82332	0.744509	1.10586	0.268789	0.535923	4.03552	2.10216	1.90747	1.856	5.18934	2.33042	5.00974	2.12005
Mcm3	43.1024	0.823053	0.873722	0.942007	0.346189	0.612509	3.51539	1.84818	1.3423	2.52623	3.78517	2.04423	5.4187	0.974075
Frem2	46.5012	0.822904	0.808551	1.01775	0.308796	0.577528	3.71361	2.0729	1.90747	2.93867	6.16616	2.24865	3.06719	1.03137
Tnc	74.5705	0.822686	0.700156	1.175	0.239993	0.502516	6.46519	2.81419	1.55424	2.73245	6.28826	3.18899	11.5531	2.52114
Hsd3b7	90.9988	0.822278	0.56388	1.45825	0.144772	0.385135	7.29115	4.03255	5.43983	3.86668	9.89027	3.47518	6.54334	4.75578
Hcfc1	3101.08	0.821205	0.190936	4.30095	1.70067e-05	0.000438345	248.49	137.402	181.069	151.419	320.152	128.541	244.251	132.245
Ctu1	177.641	0.82106	0.477573	1.71924	0.0855714	0.286176	14.8358	7.26944	5.01595	6.75379	19.9637	6.45975	19.5278	8.59478
Sipa1l1	4871.73	0.819876	0.164979	4.96957	6.71002e-07	2.5111e-05	388.935	217.293	308.233	234.527	477.114	205.69	381.456	211.661
Mll3	4761.6	0.819816	0.174874	4.68803	2.75853e-06	8.96553e-05	381.843	210.68	264.856	215.245	469.055	197.513	411.617	219.282
Cep350	3721.11	0.819033	0.168669	4.85586	1.19866e-06	4.21234e-05	298.109	164.937	209.398	163.535	339.871	162.475	345.059	168.801
Rnf19b	1212.71	0.818554	0.190017	4.3078	1.64886e-05	0.000425696	96.422	54.4843	99.6831	60.0108	83.1515	52.6184	106.432	50.8238
D6Mm5e	2.38865	0.818128	3.91079	0.209198	0.834294	NA	0.259039	0.038199	0.777118	0	0	0	0	0.114597
Thoc6	122.246	0.817397	0.484789	1.68609	0.0917788	0.297359	9.65597	5.55602	8.83089	7.06313	9.40186	4.61995	10.7352	4.98497
Zbtb8os	287.177	0.817115	0.331267	2.46664	0.0136389	0.0903919	22.8084	12.9273	26.1394	11.3423	21.4289	13.8598	20.8569	13.5798
Prrt4	90.1876	0.816773	0.544654	1.49962	0.133713	0.368238	7.15072	4.07202	7.41795	4.12445	7.08192	3.67961	6.9523	4.41199
2410004N09Rik	99.1848	0.816346	0.529112	1.54286	0.122865	0.351305	7.94761	4.39472	10.6677	4.5369	7.14297	4.57907	6.03214	4.0682
Zfp828	1136.9	0.815284	0.193375	4.21607	2.48597e-05	0.000617251	90.3091	51.1646	86.2601	51.865	101.955	49.1432	82.7119	52.4855
Nynrin	1342.21	0.815265	0.192598	4.23299	2.30607e-05	0.000579046	106.738	60.2844	93.5368	66.2491	100.002	55.6438	126.675	58.9602
Wdfy2	274.698	0.815105	0.341704	2.38541	0.01706	0.10616	21.9776	12.2052	28.1882	11.9094	21.7952	13.2466	15.9494	11.4597
Apeh	630.383	0.815093	0.262991	3.09932	0.00193962	0.0226188	50.5657	27.8779	38.644	28.9743	68.9877	26.6976	44.0653	27.9617
Ppm1m	394.643	0.814921	0.353992	2.30209	0.0213303	0.122535	31.8612	17.2473	38.2907	16.0338	17.5217	20.524	39.7712	15.1841
Mga	3323.4	0.814087	0.172348	4.72352	2.31797e-06	7.67792e-05	266.537	147.019	177.254	139.819	305.927	145.385	316.432	155.852
Ccdc107	164.986	0.81394	0.425496	1.91292	0.0557583	0.223205	13.3351	7.19539	14.624	7.06313	7.38718	5.92825	17.9942	8.59478
Dock10	1454.36	0.813451	0.198266	4.10284	4.08116e-05	0.000953987	115.995	64.983	91.488	69.7548	145.668	65.3743	110.828	59.8197
Otog	15.0494	0.813192	1.49671	0.543318	0.586911	0.796741	1.45491	0.417803	0	0.206223	2.31994	0.531499	2.04479	0.515687
Nckap5l	566.795	0.813008	0.257077	3.16251	0.00156417	0.0190496	45.4868	25.0438	59.1316	27.7885	47.9861	25.2257	29.3428	22.1172
Herc6	124.892	0.812944	0.48681	1.66994	0.0949309	0.302673	10.096	5.44525	8.19507	5.25868	15.1407	5.8056	6.9523	5.27147
D630003M21Rik	152.797	0.812426	0.512853	1.58413	0.113164	0.334929	12.6465	6.36714	18.015	6.44446	15.3238	5.72383	4.60079	6.93312
Il18r1	49.0667	0.812124	0.804208	1.00984	0.31257	0.580333	4.1587	1.94705	5.65177	1.70134	1.09892	1.96246	5.72542	2.17734
4921536K21Rik	30.4328	0.811836	1.08915	0.745386	0.456039	0.707767	2.71938	1.0676	0.353236	1.44356	5.55565	0.613268	2.24927	1.14597
Klhl29	1377.39	0.811622	0.187535	4.32784	1.50581e-05	0.000395071	109.449	61.9504	118.051	67.9504	121.858	57.5654	88.4373	60.3354
Rasd1	258.816	0.810812	0.378391	2.14279	0.03213	0.160316	20.9967	11.2097	25.2917	13.2498	27.1677	10.1802	10.5307	10.1991
Ptpro	1107.05	0.810591	0.191587	4.23093	2.32725e-05	0.000583424	87.8755	49.8832	104.275	52.6384	72.3455	42.2337	87.006	54.7774
Trap1	1212.63	0.810025	0.194441	4.16591	3.10115e-05	0.000755535	96.3864	54.511	79.0541	54.4428	110.319	52.5366	99.7859	56.5537
Tubb6	157.781	0.809997	0.474398	1.70742	0.0877437	0.289712	12.9828	6.6511	12.1513	7.16624	6.34931	6.54152	20.4479	6.24554
Akap8l	960.53	0.809746	0.223114	3.62929	0.000284206	0.0048998	76.9858	42.5404	56.7296	40.0588	70.1477	44.6459	104.08	42.9166
3110039I08Rik	22.8627	0.809588	1.07428	0.753609	0.451084	0.703413	1.92669	0.918303	1.83682	0.979558	0.671562	0.858575	3.27167	0.916777
Smchd1	1068.78	0.808877	0.253052	3.19649	0.00139111	0.0173254	86.5032	46.4934	49.1704	44.8019	121.186	42.1928	89.153	52.4855
Lars2	360147	0.808354	0.520555	1.55287	0.120454	0.347565	28785.5	16030.4	16492	11811.9	33284.8	21799.8	36579.6	14479.6
Th1l	745.482	0.808241	0.243884	3.31404	0.000919586	0.0125911	59.3783	33.3879	62.9466	30.4179	71.4297	33.9341	43.7586	35.8116
Iqsec2	2041.81	0.808055	0.181052	4.4631	8.07811e-06	0.000229498	162.173	91.9057	137.197	100.843	194.325	86.6343	154.995	88.2397
Rrp12	946.267	0.808014	0.21431	3.7703	0.000163052	0.00305227	75.3824	42.369	60.3326	43.9254	97.6206	46.2813	68.1939	36.9003
Flrt3	415.481	0.807661	0.30039	2.68871	0.00717287	0.0586202	33.211	18.4905	31.0847	21.7565	24.1762	16.64	44.372	17.075
Ints3	1280.48	0.80729	0.185777	4.34548	1.38972e-05	0.000368571	101.49	57.8506	92.901	61.0935	99.5132	56.7068	112.055	55.7515
Wdr47	2901.18	0.806734	0.193957	4.15934	3.19173e-05	0.000773215	232.988	128.028	159.239	130.694	319.297	123.839	220.429	129.552
Tuba1b	1226.73	0.805821	0.18031	4.4691	7.8551e-06	0.000226041	97.1104	55.5416	98.694	56.8659	94.3849	54.867	98.2523	54.892
H2-D1	487.229	0.805126	0.256035	3.1446	0.00166314	0.0200654	38.49	22.1396	33.7693	18.6632	40.2937	21.9141	41.4071	25.8416
Skiv2l2	1785.39	0.804742	0.174443	4.61321	3.96488e-06	0.000123946	141.751	80.4187	117.345	74.6011	170.088	79.5613	137.819	87.0938
Dhrs11	100.541	0.804693	0.541923	1.48489	0.137574	0.374432	8.06252	4.44858	10.1025	3.81512	9.27976	5.23322	4.80526	4.29739
Acadvl	629.563	0.80451	0.234145	3.43595	0.000590479	0.00877154	49.9012	28.4403	55.3167	28.3556	51.3439	28.9462	43.0429	28.019
E2f1	131.562	0.803875	0.499796	1.60841	0.107746	0.32539	10.5572	5.81402	10.3145	4.79468	6.53246	7.03214	14.8248	5.61526
Trim43c	9.32757	0.803783	1.86491	0.431003	0.666466	0.843685	0.875553	0.285149	0	0.103111	2.31994	0.695037	0.306719	0.0572985
Efnb1	221.893	0.803773	0.372669	2.1568	0.0310213	0.156901	17.5862	10.0257	13.7055	10.6205	17.5827	8.05425	21.4703	11.4024
Nme2	1142.58	0.803688	0.187294	4.29106	1.77823e-05	0.000457578	90.2973	51.8829	89.5099	46.761	96.2165	58.4649	85.1656	50.4227
Lrrc16b	900.428	0.802942	0.229522	3.49832	0.000468202	0.00731824	71.557	40.4903	62.7346	46.761	92.126	38.2679	59.8102	36.4419
Sh2d2a	11.4419	0.801324	1.46831	0.545747	0.58524	0.795747	0.979293	0.444516	1.69553	0.515557	1.03787	0.531499	0.204479	0.286493
Fam173b	86.7886	0.800599	0.554007	1.44511	0.148428	0.390899	6.86484	3.93493	7.41795	3.91823	6.83772	4.04757	6.33886	3.839
Unc79	1728.88	0.800424	0.18142	4.41199	1.02426e-05	0.000282726	137.225	77.9133	108.938	79.8598	156.535	76.9855	146.203	76.8946
Asb3	354.55	0.79921	0.294473	2.71403	0.00664695	0.0554847	28.0923	16.0272	24.02	13.8685	34.7991	17.8256	25.4577	16.3874
Oxtr	140.813	0.798955	0.546479	1.46201	0.14374	0.383306	11.5673	5.95522	12.01	5.56801	18.1932	4.90614	4.49855	7.39151
Igsf1	316.159	0.798806	0.33557	2.38045	0.0172916	0.106909	25.2041	14.1381	17.3085	15.2605	28.4498	13.2875	29.854	13.8662
Rasgrf2	4080.94	0.79851	0.139219	5.73563	9.71484e-09	5.32537e-07	322.671	185.153	295.517	190.034	348.907	181.037	323.589	184.387
Cyp2s1	67.2975	0.798007	0.678603	1.17596	0.239613	0.502261	5.49552	2.87882	5.93436	2.16534	8.30294	3.4343	2.24927	3.03682
Mpz	2.53716	0.797592	3.7245	0.214148	0.830432	NA	0.284905	0.0308134	0	0.0515557	0.854715	0.0408845	0	0
Wdr89	6302.57	0.797559	0.131981	6.04296	1.51309e-09	9.8149e-08	497.506	286.771	516.784	260.047	486.211	295.84	489.524	304.427
Tubb5	11916.9	0.797385	0.123493	6.45694	1.06842e-10	8.48632e-09	942.65	540.262	830.739	541.438	1032.37	546.585	964.836	532.762
Phf8	879.171	0.796522	0.214917	3.70618	0.000210408	0.00377812	69.6688	39.7332	55.5993	35.9859	83.8841	38.9221	69.523	44.2918
C130083M11Rik	38.0406	0.795439	0.853675	0.931781	0.35145	0.617396	2.87102	1.86268	2.61394	0.876447	2.6252	3.10722	3.37391	1.60436
Bre	376.866	0.794342	0.283239	2.80449	0.00503959	0.0452982	29.7493	17.1471	32.2857	18.56	26.8014	15.577	30.1607	17.3042
Etnk2	196.027	0.790896	0.381134	2.07511	0.0379762	0.177595	15.4668	8.92635	16.4608	9.43469	16.2396	8.46309	13.7001	8.88127
Fancg	122.372	0.790526	0.485226	1.62919	0.103273	0.31824	9.704	5.52366	11.5155	5.20712	10.4397	5.51941	7.15678	5.84445
Fam120c	2252.9	0.790263	0.165937	4.76242	1.91285e-06	6.47374e-05	178.12	102.226	159.874	108.318	212.641	101.353	161.845	97.0064
Pygm	577.125	0.790204	0.254394	3.10623	0.00189492	0.0222307	45.9413	25.8748	44.7903	24.3343	60.6237	28.8236	32.41	24.4665
Zbtb45	434.015	0.790125	0.283239	2.78961	0.00527723	0.0467326	34.4592	19.5487	43.8719	20.7254	33.6391	18.1527	25.8666	19.768
Synj1	11487	0.79003	0.14312	5.52006	3.38879e-08	1.63841e-06	911.414	518.002	730.35	517.671	1143.85	518.988	860.04	517.349
Myo1c	342.155	0.789823	0.315371	2.50443	0.012265	0.0843007	27.0819	15.495	21.83	16.0854	26.8014	16.7626	32.6145	13.6371
Ncf1	74.3246	0.789655	0.637494	1.23869	0.215462	0.476939	5.99127	3.25751	2.96718	2.62934	8.9745	2.61661	6.03214	4.52658
Eftud1	430.739	0.789433	0.269383	2.93052	0.00338395	0.0343649	34.0261	19.5742	28.1176	17.7352	38.279	20.9329	35.6816	20.0545
Sqrdl	117.334	0.789214	0.485111	1.62687	0.103764	0.318787	9.20276	5.39805	9.53736	5.56801	9.58502	6.50064	8.48589	4.12549
Scube1	130.959	0.789034	0.50372	1.56641	0.117252	0.342152	10.4272	5.86912	15.4011	7.57869	5.8609	6.41887	10.0195	3.60981
Foxf1a	10.693	0.787972	2.15128	0.36628	0.714156	0.86883	1.22455	0.106068	3.67365	0.154667	0	0.163538	0	0
Tmem208	89.0573	0.786454	0.570981	1.37737	0.168396	0.420667	7.05447	4.02762	9.53736	3.55734	6.10511	3.59784	5.52094	4.92767
Itga6	155.868	0.786314	0.426765	1.8425	0.0654023	0.246874	12.3851	7.01075	10.1025	6.65068	17.0332	8.13602	10.0195	6.24554
1700073E17Rik	806.837	0.784701	0.224083	3.50184	0.000462057	0.00724034	63.9269	36.4741	74.5327	40.4712	47.0093	34.6292	70.2387	34.3218
Mylk4	128.657	0.784585	0.549818	1.42699	0.153583	0.398762	10.8502	5.1595	6.07565	6.65068	5.31144	4.12934	21.1636	4.69848
Hadha	1173.06	0.784353	0.19549	4.01223	6.01466e-05	0.00133195	92.6158	53.3576	74.8859	51.3495	99.0859	58.8737	103.876	49.8497
Mfsd9	50.0376	0.783478	0.737059	1.06298	0.287792	0.555228	4.01227	2.2143	5.08659	2.21689	4.70093	2.24865	2.24927	2.17734
Vps18	1122.21	0.78288	0.260264	3.00803	0.0026295	0.0285269	90.4494	49.1964	51.3605	54.0819	134.618	50.5333	85.3701	42.9739
Ly6h	2377.11	0.782581	0.152734	5.12382	2.99402e-07	1.21383e-05	187.323	108.479	213.425	112.443	168.806	101.721	179.737	111.274
Naprt1	46.6526	0.782528	0.794923	0.984406	0.324916	0.591613	3.72354	2.08181	4.30947	1.95912	1.95363	2.73926	4.9075	1.54706
Tmbim4	127.753	0.782266	0.466908	1.67542	0.0938522	0.301139	10.1096	5.78765	12.0807	5.87735	10.9892	6.50064	7.25902	4.98497
Kdm4b	1077.13	0.782242	0.231563	3.3781	0.000729884	0.0103675	85.8436	48.1917	63.0879	50.3184	118.683	45.9542	75.7596	48.3027
Ctsl	577.84	0.781979	0.26084	2.99792	0.00271825	0.0292451	45.8792	26.0259	50.2301	23.4578	31.3802	25.2257	56.0273	29.3942
Leprel4	347.709	0.781681	0.316631	2.46874	0.0135588	0.0900526	27.5715	15.6967	36.03	15.0027	25.2141	15.4135	21.4703	16.6739
Tubgcp6	768.274	0.780381	0.255492	3.05443	0.00225489	0.0253826	61.1286	34.4737	44.649	37.3263	55.9228	34.1795	82.8141	31.9153
Trim17	82.9118	0.779833	0.623876	1.24998	0.211307	0.472444	6.84318	3.47417	2.47265	3.24801	8.24189	3.9658	9.81501	3.20872
Syt4	2502.57	0.778982	0.15624	4.98582	6.16989e-07	2.32573e-05	196.645	114.77	215.12	112.082	186.999	104.91	187.814	127.317
Arvcf	1003.61	0.778127	0.194423	4.00223	6.27493e-05	0.00137878	78.906	45.981	84.4233	46.3486	77.0464	47.8758	75.2484	43.7188
Map2k3	135.185	0.777756	0.504248	1.54241	0.122975	0.351351	11.0411	5.78107	13.423	6.13513	15.2017	5.76472	4.49855	5.44336
Vps8	1288.24	0.777178	0.199447	3.89667	9.75242e-05	0.00200988	101.97	58.3355	81.2442	58.1548	131.016	58.751	93.6515	58.1007
Tmod1	293.604	0.776584	0.318054	2.44167	0.0146195	0.0950033	23.1414	13.3939	18.9334	11.5485	28.8161	15.1682	21.6748	13.4652
Mesdc2	1125.26	0.776262	0.187373	4.14288	3.42978e-05	0.000823995	88.5139	51.5107	89.086	50.473	78.8169	49.7973	97.6389	54.2617
Kif1b	20978.5	0.775801	0.156051	4.97145	6.64555e-07	2.49296e-05	1669.35	941.167	1106.26	916.402	2146.74	981.269	1755.05	925.83
Parp2	303.945	0.775499	0.333549	2.32499	0.0200724	0.117609	23.8969	13.9253	26.422	12.8374	26.252	12.8377	19.0166	16.1009
C330006K01Rik	239.292	0.77549	0.365283	2.12298	0.0337554	0.165389	18.8029	10.974	14.5533	11.3423	21.6121	13.0422	20.2435	8.53748
Gas2l3	88.4214	0.77546	0.619153	1.25245	0.210405	0.471442	6.94288	4.06007	4.804	5.41335	9.89027	2.41219	6.13438	4.35469
Lama5	108.532	0.774768	0.543585	1.42529	0.154072	0.3995	8.83874	4.66678	4.16818	4.33068	8.8524	5.31499	13.4956	4.35469
Ube2o	4370.75	0.774501	0.16542	4.68204	2.84038e-06	9.19315e-05	344.68	199.207	272.133	216.843	409.897	191.462	352.011	189.314
Zmym3	2226.64	0.774475	0.167056	4.63601	3.55196e-06	0.000112164	175.627	101.451	180.221	106.772	207.818	100.576	138.841	97.0064
Nup214	1031.84	0.773768	0.217125	3.56369	0.000365674	0.00606264	81.5717	46.8287	60.3326	48.153	97.3764	46.036	87.006	46.2972
Asphd1	58.2666	0.773032	1.00512	0.769092	0.441838	0.696258	5.01203	2.23854	0.141294	3.55734	6.71562	1.26742	8.17917	1.89085
Pctp	36.07	0.772953	0.903056	0.85593	0.392036	0.652941	3.0591	1.42937	4.16818	1.90756	4.39568	1.34919	0.613438	1.03137
Mthfd1l	394.562	0.772774	0.343787	2.24783	0.0245869	0.134731	31.8728	17.2256	15.7543	17.6836	43.7736	16.8035	36.0906	17.1896
Adamtsl1	167.338	0.772672	0.430404	1.79522	0.0726182	0.262586	13.1767	7.64642	11.3742	9.38313	17.2164	6.90948	10.9396	6.64663
Olfr1372-ps1	3.35024	0.772362	2.9352	0.263138	0.792445	NA	0.246245	0.170652	0.49453	0.103111	0.244204	0.408845	0	0
Slc26a7	20.2656	0.772142	1.24153	0.62193	0.533988	0.762269	1.78668	0.735123	0.353236	1.28889	0.610511	0.286192	4.39631	0.630284
Slc29a4	488.281	0.772129	0.263191	2.93372	0.00334929	0.0340796	38.421	22.3397	41.9644	24.5921	31.3802	21.9141	41.9183	20.5129
Xpo5	1010.11	0.77067	0.229195	3.36251	0.000772366	0.010862	80.0423	45.6536	54.6809	46.761	97.3154	43.2149	88.1306	46.9848
Six4	55.2681	0.770544	0.685517	1.12403	0.260999	0.525475	4.3416	2.53583	4.02689	2.37156	4.09042	2.65749	4.9075	2.57843
1110054M08Rik	39.852	0.770457	0.855262	0.900843	0.367672	0.632128	3.32022	1.63887	5.72242	1.70134	3.1136	1.55361	1.12464	1.66166
Fbxl6	141.266	0.770032	0.447272	1.72162	0.0851383	0.285592	11.0942	6.48461	10.1025	7.32091	10.1955	5.88737	12.9844	6.24554
Abcf3	1663.62	0.769359	0.20652	3.72535	0.000195041	0.00353892	132.306	74.7111	91.0641	74.8589	180.711	74.328	125.141	74.9465
Gucy1a3	1240.9	0.76903	0.193091	3.98272	6.81297e-05	0.00148134	97.5975	56.8179	95.5855	57.5877	83.8231	58.2604	113.384	54.6055
Col6a3	119.406	0.768577	0.488143	1.57449	0.115374	0.339392	9.31638	5.54226	8.61895	6.90846	11.3555	5.76472	7.97469	3.9536
Brms1	354.958	0.767812	0.31994	2.39986	0.0164014	0.103	27.8661	16.3041	34.1226	13.3014	27.2898	19.6246	22.186	15.9863
1110038F14Rik	363.012	0.767729	0.291765	2.63133	0.00850522	0.065908	28.5259	16.6464	23.8081	15.9307	30.5866	17.6212	31.1831	16.3874
Trpt1	190.974	0.76762	0.475736	1.61354	0.106627	0.323101	15.6685	8.09589	8.90154	8.86758	10.806	9.11725	27.298	6.30284
Lipt2	50.3	0.766617	0.72671	1.05491	0.291465	0.559221	3.94025	2.31896	2.5433	1.95912	5.49459	3.39341	3.78287	1.60436
Tmem60	96.1175	0.765248	0.541562	1.41304	0.157644	0.404184	7.52907	4.43158	7.55924	4.43379	8.79135	3.76138	6.23662	5.09957
Adamts15	146.357	0.765244	0.467722	1.63611	0.101817	0.315539	11.7287	6.48362	10.3145	7.93958	7.08192	5.43764	17.7897	6.07365
Mllt4	3741.04	0.765166	0.156032	4.90391	9.39485e-07	3.42527e-05	295.004	170.523	246.417	172.866	378.394	177.234	260.2	161.467
Pcdhgb4	32.0376	0.764792	0.937862	0.815464	0.414807	0.672782	2.66174	1.32495	3.17912	1.856	4.09042	1.14477	0.715678	0.974075
Pcdh8	434.251	0.764511	0.269989	2.83164	0.00463103	0.0428123	34.0831	19.9542	37.9375	21.0347	29.2435	19.461	35.0682	19.3669
Lenep	49.1074	0.7645	0.756747	1.01025	0.312378	0.580114	3.87649	2.23432	2.47265	2.78401	5.06724	1.79892	4.08959	2.12005
Mamdc2	29.0936	0.763939	0.978567	0.780671	0.434996	0.690017	2.41323	1.20711	2.33135	1.13423	4.09042	1.22654	0.817917	1.26057
Egflam	67.4998	0.763823	0.758055	1.00761	0.313643	0.5812	6.10911	2.29041	7.20601	3.04179	0.488408	1.3083	10.6329	2.52114
Kdelr2	255.872	0.763734	0.389317	1.96173	0.0497942	0.208252	20.4112	11.4289	20.6996	11.2391	28.5719	10.3847	11.962	12.663
3110047P20Rik	613.307	0.763097	0.247078	3.08849	0.00201178	0.0233204	48.2692	28.0493	38.2907	28.8196	58.9753	28.7418	47.5414	26.5865
Thada	522.012	0.761883	0.254836	2.9897	0.00279254	0.0298012	41.0508	23.9073	31.438	20.4676	41.5147	26.6158	50.1997	24.6384
Hadhb	700.573	0.761058	0.26236	2.90082	0.00372191	0.0369714	55.9823	31.1954	36.03	31.7067	83.762	33.975	48.1549	27.9044
Slc2a8	100.643	0.76079	0.519357	1.46487	0.142956	0.382659	7.94281	4.58096	11.3035	5.77424	6.28826	3.84314	6.23662	4.12549
Eif3d	1972.81	0.760752	0.15979	4.76094	1.92696e-06	6.50735e-05	154.641	90.8506	132.322	85.9949	166.791	92.3581	164.81	94.1988
Gab2	961.25	0.760392	0.22421	3.39142	0.000695302	0.0100128	75.5955	44.0204	93.1835	39.801	60.5016	45.5045	73.1014	46.7556
Nbea	7063.6	0.759827	0.170247	4.46309	8.07844e-06	0.000229498	560.244	318.734	372.098	320.883	744.579	333.413	564.056	301.906
Zfp791	137.265	0.759688	0.457439	1.66074	0.0967653	0.305939	10.8995	6.18143	7.06471	5.56801	10.1955	5.64206	15.4382	7.33421
Uck2	249.509	0.759661	0.387929	1.95825	0.0502009	0.209209	19.758	11.2903	17.5911	12.1156	27.7782	9.32167	13.9046	12.4338
Junb	332.407	0.759605	0.305367	2.48751	0.012864	0.0870269	25.9542	15.4098	37.3017	21.2409	18.6816	9.68963	21.8793	15.2987
Fbxl13	5.05372	0.75891	2.58328	0.293778	0.768928	0.896678	0.432508	0.196366	0.0706471	0	0	0.245307	1.22688	0.343791
Psma5	983.355	0.758685	0.199199	3.80867	0.000139716	0.0026623	76.9876	45.3789	69.5874	40.5228	89.5008	47.7122	71.8745	47.9016
Fau	5528.61	0.758486	0.142985	5.30465	1.1289e-07	5.02137e-06	432.143	255.825	421.975	215.193	384.011	275.643	490.444	276.637
Atg2b	2426.06	0.758386	0.211105	3.59247	0.000327562	0.0055369	193.454	108.439	111.552	109.401	247.257	108.998	221.553	106.919
Rad50	489.287	0.75836	0.295372	2.56747	0.0102443	0.0742816	38.9817	21.9041	25.9981	22.5814	56.5943	21.8732	34.3525	21.2578
Hcn4	421.142	0.757885	0.32696	2.31797	0.0204507	0.119138	33.406	19	20.5583	21.1894	43.7736	16.5582	35.8861	19.2523
Pde4dip	6478.14	0.757207	0.139287	5.43632	5.43925e-08	2.55055e-06	508.279	297.846	411.731	295.93	545.369	295.472	567.737	302.135
Gfra1	480.345	0.756931	0.28162	2.68777	0.007193	0.0586901	37.9957	21.7774	50.442	21.8081	27.0456	21.7506	36.4996	21.7734
Aldh2	1123.07	0.756792	0.202983	3.72834	0.000192744	0.00350133	88.3509	51.4018	70.0819	50.3699	110.93	52.2095	84.041	51.626
1700001G11Rik	10.4595	0.756589	1.50781	0.501779	0.615823	0.816135	0.79601	0.505543	0.918412	0.412445	0.549459	0.81769	0.920157	0.286493
Wdr46	341.973	0.756375	0.300743	2.51502	0.0119025	0.0825383	26.8242	15.7301	22.6777	15.4152	32.235	16.4765	25.5599	15.2987
Tln1	989.247	0.756366	0.197597	3.82781	0.000129288	0.0025128	77.234	45.8657	77.7118	50.5761	77.4127	45.9951	76.5775	41.0258
Ahi1	19820.1	0.756147	0.134251	5.63234	1.77783e-08	9.2566e-07	1553.53	912.844	1330.57	930.013	1817.49	865.157	1512.53	943.363
Aff2	1072.93	0.755531	0.188421	4.0098	6.07713e-05	0.00134197	83.8551	49.6585	80.2551	48.1015	85.8378	50.7377	85.4724	50.1362
Nes	134.642	0.754913	0.458848	1.64523	0.0999215	0.312355	10.5698	6.18469	10.6677	5.61957	8.36399	6.45975	12.6777	6.47473
Fam135b	752.172	0.754681	0.259008	2.91374	0.0035713	0.0358928	59.184	34.4145	41.9644	39.2339	73.0171	32.0943	62.5707	31.9153
Nhlh2	382.9	0.754357	0.300659	2.50902	0.0121068	0.0834998	29.973	17.6742	31.2967	16.5494	34.4938	16.7626	24.1286	19.7107
Fig4	710.473	0.754245	0.23846	3.16299	0.0015616	0.0190375	55.8351	32.5746	43.3067	33.6659	68.6824	32.8303	55.5161	31.2277
Ddx3x	8078.23	0.753523	0.136472	5.52144	3.36237e-08	1.6307e-06	633.724	371.512	519.68	352.28	765.397	375.606	616.096	386.651
C77080	445.603	0.753248	0.274978	2.7393	0.00615707	0.0526377	35.1849	20.265	42.4589	22.1689	22.711	16.9671	40.3847	21.6588
Fam123c	745.158	0.753242	0.245285	3.07088	0.00213426	0.0243772	58.6147	34.111	53.4799	36.2436	75.9475	31.4811	46.4168	34.6083
Hebp2	148.779	0.752833	0.434718	1.73177	0.0833141	0.282119	11.7042	6.80946	10.4558	6.13513	9.21871	6.50064	15.4382	7.7926
Neurl4	2339.27	0.752574	0.161784	4.65172	3.29173e-06	0.000105012	183.251	107.842	159.451	110.329	219.051	110.347	171.251	102.851
Nenf	1089.84	0.752503	0.199892	3.76456	0.000166844	0.00311442	85.2574	50.3603	81.7387	53.1539	76.497	50.9421	97.5366	46.9848
Nkx2-9	27.59	0.752175	0.974641	0.771746	0.440265	0.69478	2.23821	1.19502	1.13035	1.23734	3.84622	1.43096	1.73807	0.916777
Siah1b	35.5361	0.751862	1.10826	0.678418	0.497507	0.737496	2.94689	1.47514	4.87465	1.03111	0.183153	2.53484	3.78287	0.859478
Chd4	6214.79	0.751207	0.130623	5.75097	8.87318e-09	4.95117e-07	485.763	287.592	431.018	288.454	531.327	293.673	494.942	280.648
Pola2	105.631	0.750809	0.518326	1.44853	0.14747	0.389648	8.26222	4.88226	6.42889	5.36179	9.46291	5.2741	8.89485	4.0109
Ctnnbl1	743.362	0.750697	0.225614	3.32735	0.000876774	0.0121101	58.3658	34.1364	43.5186	31.7067	64.7141	34.8336	66.8647	35.8689
Myo1e	276.012	0.750554	0.348183	2.15563	0.0311128	0.157159	21.6846	12.6617	16.1075	13.3014	26.8625	11.4477	22.0838	13.236
Rbbp7	2521.09	0.750485	0.153774	4.88044	1.05851e-06	3.79697e-05	197.083	116.635	183.4	113.216	184.252	120.2	223.598	116.488
1300010F03Rik	1387.1	0.749878	0.244603	3.06569	0.00217165	0.0247317	110.002	62.606	65.2779	69.6002	126.193	59.487	138.535	58.731
Pcm1	5368.25	0.749762	0.167611	4.47323	7.70475e-06	0.000222125	423.569	244.444	285.414	239.425	514.172	238.929	471.12	254.978
Acan	98.5358	0.749673	0.580681	1.29102	0.196695	0.455745	7.59693	4.66464	5.72242	5.51646	9.70712	2.57572	7.36126	5.90175
Coasy	380.444	0.749641	0.290321	2.58211	0.00981971	0.0726239	29.7852	17.5563	28.3295	19.1272	36.3864	17.7848	24.6398	15.7571
Fstl5	500.733	0.749452	0.280367	2.67311	0.00751515	0.0605569	39.2105	23.0997	29.6011	23.7672	46.5209	19.461	41.5093	26.0708
Exoc3l	80.5058	0.749199	0.585455	1.27969	0.200655	0.460867	6.26016	3.75779	5.58112	4.27912	6.34931	4.12934	6.85006	2.86493
Gart	819.267	0.749125	0.228544	3.27781	0.00104616	0.0139014	64.2576	37.6902	74.5327	34.697	70.3919	41.416	47.8482	36.9576
Las1l	1221.51	0.748814	0.203507	3.67954	0.000233653	0.00413409	96.1484	55.8537	74.2501	51.9681	127.291	57.0339	86.9037	58.5591
Rnu11	40.7626	0.748083	0.816378	0.916344	0.359487	0.624608	3.21635	1.85606	1.90747	0.773335	1.70943	1.75803	6.03214	3.03682
Pax8	13.7359	0.747967	1.40023	0.534175	0.593221	0.800768	1.00937	0.699894	1.27165	0.464001	0.427357	1.34919	1.32912	0.286493
Bcmo1	65.2394	0.747117	0.651384	1.14697	0.251394	0.515368	5.13343	2.98482	6.35824	2.47467	3.41886	2.98457	5.62318	3.49521
Izumo4	182.433	0.745934	0.41468	1.79882	0.0720472	0.261566	14.2918	8.40971	14.4827	6.80535	10.5008	9.48521	17.8919	8.93857
Tlr9	36.5178	0.74585	0.918592	0.811949	0.416821	0.674221	3.13659	1.4076	4.23883	1.23734	4.76198	2.12599	0.408959	0.859478
Pfkm	6319.29	0.745317	0.17021	4.3788	1.19334e-05	0.000324789	498.174	288.184	355.92	302.632	665.334	293.305	473.267	268.616
Itpr2	335.786	0.744647	0.330317	2.25434	0.0241747	0.133348	26.6247	15.1597	15.8956	14.3325	34.738	14.7593	29.2405	16.3874
Prok2	11.3196	0.744492	1.69796	0.438464	0.66105	0.840792	1.14644	0.26215	2.82588	0.36089	0	0.081769	0.613438	0.343791
Tsc22d1	7617.08	0.744202	0.125488	5.93047	3.02061e-09	1.881e-07	593.971	353.881	558.889	359.395	649.766	353.528	573.258	348.719
Zfr2	1089.39	0.743996	0.222073	3.35023	0.000807447	0.0112537	84.9682	50.5933	68.1745	59.0313	93.8965	47.9984	92.8336	44.7502
Nckap1l	76.1069	0.743974	0.741071	1.00392	0.315418	0.582786	6.5426	2.92798	1.05971	3.19645	8.24189	3.06634	10.3262	2.52114
Usp11	5328.08	0.743611	0.142841	5.20588	1.93084e-07	8.19057e-06	416.111	246.903	368.99	257.16	486.333	241.75	393.009	241.8
Dnm3	8825.02	0.74339	0.153827	4.83263	1.34741e-06	4.67183e-05	692.968	405.198	533.598	405.898	883.714	395.312	661.593	414.383
Gpr139	49.0978	0.743377	0.828172	0.897613	0.369392	0.633917	4.23669	1.87293	4.30947	1.49511	0.732613	1.71715	7.66798	2.40654
Panx1	176.552	0.742939	0.425819	1.74473	0.081032	0.277643	14.1009	7.86887	10.8797	7.42402	9.64607	7.9316	21.7771	8.25099
Npas4	135.351	0.742873	0.476767	1.55814	0.119199	0.345824	10.7146	6.12813	8.19507	7.2178	16.1785	6.29621	7.77022	4.87038
Reep4	27.8988	0.7428	0.966353	0.768663	0.442093	0.696258	2.2419	1.22977	1.201	1.18578	3.47991	1.18565	2.04479	1.31787
Prlr	437.134	0.742565	0.265991	2.79169	0.00524332	0.0465117	34.0581	20.3378	35.2529	20.7769	30.8308	18.8069	36.0906	21.4297
Ppme1	4533.42	0.742235	0.135394	5.48204	4.20446e-08	1.99558e-06	353.382	210.747	346.595	209.729	388.224	210.106	325.327	212.406
Thrap3	4606.33	0.741317	0.142627	5.1976	2.01879e-07	8.48271e-06	359.994	213.207	353.236	210.553	301.226	210.187	425.522	218.88
Hspa8	50986.4	0.741117	0.109852	6.74651	1.51447e-11	1.34727e-09	3969.85	2374.79	3937.16	2482.35	4203.43	2399.23	3768.96	2242.78
Cct3	2156.38	0.740716	0.165788	4.46785	7.90103e-06	0.000226525	168.507	99.828	136.632	98.3167	194.264	100.78	174.625	100.387
Ifi27l2a	16.935	0.740653	1.38893	0.533256	0.593857	0.801004	1.52431	0.583041	0.141294	0.824891	1.15997	0.695037	3.27167	0.229194
Cilp2	13.6184	0.740054	1.64384	0.4502	0.652567	0.83704	1.28641	0.408231	1.201	0.464001	0	0.531499	2.65823	0.229194
Lrrc6	144.561	0.739438	0.459944	1.60767	0.107908	0.325563	11.3724	6.61642	8.26571	5.82579	15.9343	6.17356	9.91725	7.8499
Eif2c2	3895.45	0.739132	0.136648	5.40901	6.33747e-08	2.93636e-06	302.815	181.926	310.706	201.377	297.258	167.749	300.482	176.651
Vps13b	1717.17	0.738963	0.224715	3.28844	0.00100743	0.0135205	136.567	77.1144	75.7337	75.1682	176.926	74.1236	157.04	82.0515
Epyc	5.33417	0.738929	2.7609	0.26764	0.788976	0.906612	0.59016	0.0736122	0	0	1.77048	0.163538	0	0.0572985
5930412G12Rik	42.3218	0.737945	0.850251	0.867915	0.385441	0.647747	3.51898	1.74745	3.67365	2.01067	5.8609	1.51273	1.0224	1.71896
3000002C10Rik	46.203	0.736711	0.876522	0.840493	0.400632	0.660423	3.84335	1.90605	0.777118	2.37156	4.82303	1.22654	5.9299	2.12005
E430025E21Rik	862.401	0.736689	0.212424	3.46801	0.00052432	0.00798172	67.2292	40.086	66.3376	40.0588	58.6701	41.0072	76.6798	39.1922
Ddx3y	1120.18	0.736592	0.194934	3.77868	0.000157664	0.00297878	87.6382	51.7549	73.0491	46.761	113.799	57.5654	76.0663	50.9384
Ckb	16024.4	0.736591	0.129191	5.70157	1.18712e-08	6.32915e-07	1250.55	743.491	1051.94	750.754	1485.92	769.733	1213.79	709.986
Bpifb1	11.1296	0.736486	1.56637	0.470188	0.638221	0.828883	1.05848	0.326462	0.211941	0.464001	0.305255	0.286192	2.65823	0.229194
Snhg5	96.2562	0.735844	0.583361	1.26139	0.20717	0.467626	7.66525	4.31265	9.60801	4.33068	9.70712	3.67961	3.68063	4.92767
Slc7a4	249.73	0.73517	0.361695	2.03257	0.0420961	0.188699	19.3863	11.6895	16.3901	12.1671	22.6499	9.32167	19.1188	13.5798
Thop1	663.001	0.735129	0.226513	3.24542	0.00117276	0.0152019	51.649	30.8533	54.3276	30.4179	39.3779	25.4711	61.2416	36.6711
Blm	126.476	0.734409	0.49853	1.47315	0.140711	0.378273	9.98444	5.754	8.12442	5.10401	14.7744	5.39676	7.05454	6.76123
Aldh1b1	189.316	0.734315	0.398944	1.84065	0.0656733	0.247316	14.9385	8.6195	21.1235	10.208	14.2859	7.97248	9.40605	7.678
Cage1	225.824	0.733857	0.420267	1.74617	0.0807816	0.277333	18.0028	10.0983	24.4439	9.58936	9.21871	11.3659	20.3457	9.33966
Urb1	256.729	0.733767	0.36615	2.00401	0.0450692	0.196648	20.2566	11.6901	12.9284	11.9094	26.9846	11.5294	20.8569	11.6316
Napepld	536.409	0.733728	0.250615	2.92771	0.00341474	0.0345873	41.7072	25.0424	40.1982	25.417	46.2767	23.7539	38.6466	25.9562
Rusc1	2588.98	0.733386	0.154489	4.74716	2.06296e-06	6.93655e-05	201.335	120.832	200.143	132.911	226.988	117.911	176.875	111.675
Ppp6r3	1515.62	0.733217	0.22783	3.21826	0.00128971	0.0163771	120.755	67.8462	71.3536	66.8162	179.673	70.1987	111.237	66.5236
Snhg4	166.685	0.733053	0.41387	1.77121	0.0765252	0.269863	13.0292	7.71273	10.1732	6.70224	16.8501	8.29956	12.0643	8.13639
A130010J15Rik	212.768	0.733012	0.368515	1.9891	0.0466904	0.201087	16.5251	9.95122	17.0966	9.0738	15.507	10.7526	16.9718	10.0272
Cep120	1916.34	0.73178	0.177808	4.11556	3.86241e-05	0.000911062	149.816	88.6495	115.861	88.6758	187.793	94.0753	145.794	83.1975
Aacs	791.365	0.731562	0.246377	2.96927	0.00298505	0.0312728	61.9331	36.5426	42.3883	37.8934	79.0001	42.111	64.411	29.6233
Cnksr2	1681.51	0.731303	0.164559	4.44401	8.82981e-06	0.000247235	130.693	78.5506	118.97	75.1682	130.893	79.2342	142.215	81.2493
Cpsf2	1047.51	0.730619	0.213248	3.42614	0.000612223	0.00902565	81.9483	48.4015	70.3645	45.5237	107.389	48.857	68.0916	50.8238
Slit1	1042.24	0.729627	0.260193	2.80418	0.00504448	0.0453159	82.2684	47.4256	48.1813	51.8135	103.848	41.7022	94.7762	48.7611
Tssc4	307.883	0.729007	0.310451	2.34822	0.0188632	0.112967	23.8976	14.4147	23.4548	15.0027	25.3362	14.146	22.9017	14.0954
Ppan	233.236	0.728291	0.350618	2.07717	0.0377863	0.17737	18.1191	10.9043	15.6837	10.0018	19.9637	11.3659	18.7099	11.3451
Matr3	7689.9	0.728188	0.149911	4.85749	1.18886e-06	4.18735e-05	603.026	353.889	406.857	320.315	732.857	360.601	669.363	380.749
Hscb	109.129	0.728169	0.510779	1.4256	0.153983	0.399401	8.5981	4.98169	12.2926	5.25868	7.26508	4.98791	6.23662	4.69848
Fndc3b	921.362	0.728103	0.2075	3.50892	0.000449922	0.00709665	71.5778	43.0744	71.9188	43.049	79.7327	41.5387	63.0819	44.6356
Rgs12	471.705	0.727936	0.267157	2.72475	0.00643494	0.0542977	36.7818	21.9162	45.2848	22.3236	35.1044	22.5683	29.9562	20.8567
Ftsjd2	1855.59	0.727108	0.160816	4.52137	6.1442e-06	0.000182121	144.044	86.8616	136.49	87.3869	139.319	84.958	156.324	88.2397
Abcf2	2475.48	0.726695	0.167921	4.3276	1.5074e-05	0.000395071	192.928	115.115	178.101	118.939	237.916	112.841	162.766	113.566
Slc25a24	152.13	0.726305	0.437715	1.65931	0.0970531	0.306475	11.9165	7.01418	8.5483	6.34135	11.6608	7.76806	15.5404	6.93312
Rnasek	1078.26	0.726301	0.21522	3.37469	0.00073898	0.0104586	83.9196	50.2564	103.074	45.1628	70.8803	49.5111	77.8044	56.0953
Sec13	706.72	0.725785	0.221896	3.27084	0.00107229	0.0141354	54.8007	33.142	57.2242	31.449	53.2976	34.6292	53.8803	33.3477
Kctd15	224.032	0.72549	0.357543	2.0291	0.0424481	0.18963	17.3479	10.5302	18.1563	12.0125	15.9954	9.32167	17.8919	10.2564
Ints4	691.334	0.725355	0.296418	2.44707	0.0144024	0.094011	55.2608	30.7673	29.036	32.3254	82.9684	30.0092	53.7781	29.9671
Xab2	761.08	0.725007	0.221172	3.27802	0.00104538	0.0139014	59.124	35.5831	54.257	36.7592	68.6214	35.038	54.4937	34.9521
Lrrc14	213.588	0.723415	0.3763	1.92245	0.0545498	0.219894	16.6804	9.89797	20.8409	10.0018	12.6376	9.89405	16.5628	9.79805
Hif1a	2771.36	0.722873	0.161328	4.48076	7.43784e-06	0.000214828	215.875	128.987	167.363	125.899	251.347	130.422	228.915	130.641
Pdcd6ip	2638.75	0.722072	0.187732	3.84628	0.000119925	0.00236029	207.378	120.982	139.881	119.403	279.919	123.389	202.332	120.155
Pusl1	186.613	0.721566	0.401228	1.7984	0.0721144	0.261574	14.6145	8.60725	15.7543	8.76447	18.3764	9.03548	9.71277	8.0218
Dpp7	104.561	0.721457	0.511473	1.41055	0.158378	0.404885	8.05671	4.95458	7.62989	4.94935	8.9745	6.13268	7.56574	3.7817
Ash1l	6291.1	0.720678	0.166929	4.31728	1.57964e-05	0.000411922	490.618	292.232	381.777	299.539	623.148	266.199	466.929	310.959
Flot1	2210.33	0.720293	0.176702	4.07631	4.57557e-05	0.00105218	172.583	102.466	125.469	99.3994	212.03	104.746	180.249	103.252
Fam78a	55.8787	0.720238	0.778466	0.925202	0.354861	0.62017	4.80458	2.14884	1.27165	2.21689	9.76817	2.16688	3.37391	2.06275
Rnh1	558.598	0.719443	0.253637	2.8365	0.00456107	0.0423668	43.5042	26.0064	43.5186	27.4276	53.6639	26.1252	33.3301	24.4665
Paf1	1790.14	0.718857	0.181886	3.95224	7.74245e-05	0.00165569	140.001	82.7605	104.982	79.138	128.024	79.3568	186.996	89.7868
Rdh10	113.05	0.718411	0.501336	1.43299	0.15186	0.396052	8.80302	5.26471	5.93436	4.17601	11.4776	5.02879	8.99709	6.58933
Ccdc144b	1.52882	0.717756	3.96426	0.181057	0.856323	NA	0.122102	0.0681409	0	0	0.366306	0.204423	0	0
Col6a2	58.3123	0.717448	0.671158	1.06897	0.285083	0.552435	4.47064	2.78561	3.03783	1.75289	2.80835	1.67626	7.56574	4.92767
Pop1	79.7583	0.717349	0.59836	1.19886	0.230583	0.492552	6.22869	3.69625	8.05377	3.1449	4.39568	4.04757	6.23662	3.8963
Plod2	55.6539	0.716535	0.802793	0.892553	0.372096	0.636501	4.59982	2.32562	1.201	3.04179	7.99769	2.04423	4.60079	1.89085
4933427D06Rik	2.21008	0.716394	3.93524	0.182046	0.855547	NA	0.244204	0.0308134	0	0.0515557	0.732613	0.0408845	0	0
Cabin1	1931.53	0.716258	0.18592	3.85252	0.000116911	0.00232151	150.318	90.0371	115.932	94.3469	152.933	88.2697	182.089	87.4949
Tmod4	3.23162	0.715748	3.71893	0.192461	0.847381	NA	0.374879	0.0272563	0	0	0	0.081769	1.12464	0
4933427G17Rik	4.72994	0.715249	2.66735	0.26815	0.788584	0.906454	0.356304	0.232279	0.353236	0.206223	0	0.490614	0.715678	0
Ap3b1	1106.68	0.714789	0.204936	3.48787	0.000486887	0.00756203	86.4259	51.2867	63.1585	48.3592	114.532	56.3389	81.5873	49.1621
Lemd2	356.231	0.714761	0.313789	2.27784	0.0227362	0.127921	27.7363	16.5923	29.036	14.2294	20.0247	17.4986	34.1481	18.049
Hmga2	293.586	0.713643	0.365152	1.95437	0.0506573	0.210358	23.4533	13.0799	19.428	12.528	13.6144	13.2466	37.3175	13.4652
Rapgef2	3994.81	0.71311	0.159838	4.46144	8.14103e-06	0.000230436	310.765	186.34	290.006	194.262	392.314	182.836	249.976	181.923
Wdr35	1178.58	0.712796	0.209074	3.40931	0.000651285	0.00949364	92.1669	54.493	66.8322	52.8961	124.605	57.5245	85.0634	53.0584
Gcm1	21.2028	0.712784	1.10024	0.647844	0.517086	0.750316	1.60393	1.0345	1.201	1.59823	1.77048	0.81769	1.84031	0.687582
Acy3	60.1074	0.712733	0.698938	1.01974	0.307853	0.576456	4.74151	2.73812	2.61394	3.09334	5.06724	2.94368	6.54334	2.17734
Ccnf	41.1026	0.712721	0.86161	0.827197	0.408125	0.667235	3.58809	1.52663	1.90747	1.34045	7.93664	1.92157	0.920157	1.31787
2210009G21Rik	210.775	0.712317	0.368605	1.93247	0.0533017	0.216998	16.3092	9.91914	15.8956	10.672	19.5363	10.8344	13.4956	8.25099
Zfp595	64.3592	0.712248	0.698159	1.02018	0.307643	0.576385	5.26192	2.7468	7.98312	2.42312	1.77048	2.49396	6.03214	3.32332
Hes6	343.029	0.712197	0.331715	2.14702	0.0317919	0.1594	27.016	15.6698	39.7743	15.5698	19.2921	16.5991	21.9815	14.8403
Tars	719.278	0.711648	0.258419	2.75386	0.00588978	0.0507621	56.6981	32.8073	32.4977	29.3867	76.2528	32.4214	61.3438	36.6138
Lta4h	800.277	0.711438	0.216093	3.29228	0.000993792	0.013372	61.8254	37.7594	56.8709	40.729	66.5456	37.9408	62.0595	34.6083
Tekt1	97.2908	0.711273	0.588908	1.20778	0.227131	0.488124	8.01608	4.09057	8.33636	4.43379	2.6252	3.59784	13.0867	4.24009
Brd1	2269.99	0.709981	0.156253	4.54379	5.52517e-06	0.000166375	175.694	106.778	176.688	109.092	200.614	109.938	149.781	101.304
Ighmbp2	275.362	0.709809	0.370548	1.91557	0.0554203	0.222068	21.8849	12.3805	20.1344	12.1156	33.456	12.8786	12.0643	12.1473
Gli2	177.92	0.709533	0.398051	1.78252	0.074665	0.266419	13.771	8.36894	15.6837	9.5378	11.1113	7.60452	14.518	7.9645
Pcdhb11	66.6186	0.709475	0.675655	1.05005	0.293693	0.561294	5.53299	2.75688	1.41294	1.70134	5.67775	3.47518	9.50829	3.09412
Def6	78.6234	0.709186	0.618518	1.14659	0.251552	0.51544	6.23832	3.5454	3.81494	3.24801	9.89027	3.14811	5.00974	4.24009
Recql4	25.5881	0.709057	1.12255	0.631646	0.527618	0.758062	2.22243	0.961702	3.53236	1.13423	2.93045	0.776806	0.204479	0.974075
1700007G11Rik	19.4048	0.708806	1.43582	0.49366	0.621546	0.819613	1.81355	0.601141	4.09753	0.412445	1.34312	0.531499	0	0.859478
Ift140	734.578	0.708678	0.264154	2.68282	0.00730048	0.0592873	57.8095	33.5998	33.9106	33.6659	76.4359	34.8745	63.0819	32.2591
F12	7.95395	0.708199	1.93864	0.365307	0.714882	0.869117	0.731178	0.258593	1.76618	0.309334	0.427357	0.122654	0	0.343791
Ptbp1	431.949	0.708145	0.272109	2.60243	0.00925653	0.0697848	33.4204	20.3304	38.3614	20.5192	33.2728	20.6467	28.6271	19.8253
Rsph1	237.413	0.707568	0.354187	1.99772	0.0457467	0.198633	18.3638	11.1793	21.83	13.4045	14.347	10.5073	18.9143	9.62615
Kif17	575.783	0.707367	0.255959	2.76359	0.00571685	0.0496374	44.6207	27.0285	39.4211	27.5823	40.0495	28.5783	54.3915	24.9249
Sik3	6103.96	0.706598	0.154784	4.56506	4.9936e-06	0.000152134	472.74	286.822	381.494	309.953	559.472	281.613	477.255	268.902
Gorasp1	438.045	0.706223	0.285609	2.47269	0.0134099	0.0895221	33.8263	20.683	36.3833	22.8392	27.7782	22.0776	37.3175	17.1323
Rapgef3	576.57	0.705952	0.275253	2.56474	0.0103254	0.074731	45.086	26.6611	30.5902	27.9432	60.8068	26.3705	43.8608	25.6697
Hn1l	242.708	0.705874	0.355341	1.98647	0.0469809	0.201723	18.8327	11.3693	21.1235	11.2907	21.3679	11.5294	14.0068	11.2878
Glg1	2529.67	0.705625	0.178348	3.95645	7.60732e-05	0.00163353	196.766	118.02	141.224	117.547	235.291	114.64	213.783	121.874
Fam43b	611.262	0.705243	0.238697	2.95455	0.00313124	0.0322615	47.3421	28.722	57.86	31.8099	46.3377	27.0247	37.8287	27.3314
Usp24	2355.47	0.704542	0.169407	4.15887	3.19821e-05	0.000773215	182.628	110.482	141.93	110.69	191.456	108.794	214.499	111.961
As3mt	574.668	0.704296	0.243779	2.88907	0.00386384	0.037832	44.4867	27.0237	46.1326	25.8294	35.2875	25.3893	52.04	29.8525
Myc	114.993	0.704257	0.518477	1.35832	0.174363	0.428604	9.03218	5.27731	7.20601	7.01157	5.37249	3.4343	14.518	5.38606
Atp6v1h	1932.71	0.704057	0.167305	4.20822	2.57387e-05	0.000636031	149.504	90.9986	129.991	87.5931	178.452	92.5216	140.068	92.8809
Slc22a4	94.5933	0.702898	0.542263	1.29623	0.194896	0.453873	7.35239	4.41859	9.67865	4.33068	6.95982	5.02879	5.4187	3.8963
Clec9a	1.80188	0.702803	3.96221	0.177376	0.859213	NA	0.142452	0.081769	0	0	0.427357	0.245307	0	0
Trpc4ap	2724	0.702658	0.158963	4.42025	9.85864e-06	0.000273582	210.425	128.544	182.835	135.643	243.96	128.459	204.479	121.53
Gan	308.821	0.702275	0.334788	2.09767	0.0359345	0.171886	23.993	14.436	28.3295	14.4356	26.9846	13.5737	16.6651	15.2987
Gpr84	6.32007	0.702215	2.34662	0.299245	0.764753	0.89429	0.509735	0.276721	0	0.257778	0.915766	0.572383	0.613438	0
Chchd8	91.6541	0.701657	0.567542	1.23631	0.216344	0.477904	7.26895	4.13629	10.5971	4.74312	7.63138	3.88403	3.57839	3.7817
Csmd1	1153.76	0.701583	0.22116	3.17229	0.00151243	0.0185348	89.2294	54.342	66.8322	60.1655	94.6291	45.2183	106.227	57.6423
Gpr153	952.135	0.701562	0.203669	3.44461	0.000571876	0.00856879	73.4257	45.0559	82.3039	48.7717	74.4823	40.8436	63.4908	45.5523
Sh2d3c	456.936	0.700986	0.304373	2.30305	0.0212761	0.122495	35.9227	20.9374	35.7474	22.3236	50.5503	20.3196	21.4703	20.1691
Dusp10	240.348	0.700874	0.413359	1.69556	0.0899696	0.293714	19.0396	10.8688	15.4011	11.9094	11.966	11.8156	29.7517	8.88127
Plcb4	4310.89	0.700814	0.200135	3.50171	0.000462288	0.00724034	340.452	195.986	197.671	194.829	494.269	198.944	329.416	194.185
Anapc7	561.705	0.700403	0.246394	2.84261	0.00447457	0.0417982	43.394	26.5032	51.0072	26.7574	38.279	26.4523	40.8959	26.3
Zbtb8a	100.417	0.700265	0.558212	1.25448	0.209669	0.470267	8.01839	4.47723	4.09753	4.22757	12.6986	4.33376	7.25902	4.87038
Chd2	3413.65	0.700195	0.142215	4.9235	8.50098e-07	3.12868e-05	263.456	161.331	227.06	150.182	300.86	166.441	262.449	167.369
Anapc1	1514.69	0.699721	0.202979	3.44726	0.000566304	0.00849347	117.95	70.5339	79.8312	70.1157	132.725	70.6076	141.295	70.8783
Echdc3	24.2392	0.698611	1.14251	0.61147	0.540888	0.766342	2.23956	0.776721	0.282588	0.824891	5.31144	0.81769	1.12464	0.687582
Rec8	100.334	0.698354	0.520271	1.34229	0.179503	0.43467	7.78027	4.70501	11.4448	6.18668	5.25039	3.22988	6.64558	4.69848
Nprl2	402.779	0.698099	0.280522	2.48857	0.0128257	0.0869647	31.0536	19.0673	33.0628	17.9414	33.8223	20.524	26.2756	18.7366
Hspa2	640.212	0.697388	0.27086	2.57472	0.0100321	0.0735112	50.1814	29.4852	40.7634	30.4179	73.3834	28.7009	36.3973	29.3369
Fmo1	109.174	0.697235	0.506265	1.37721	0.168446	0.42068	8.42674	5.15861	9.39607	5.56801	9.34081	4.57907	6.54334	5.32876
Grb10	4219.86	0.696249	0.152564	4.56364	5.0274e-06	0.000152865	325.81	199.3	266.481	204.985	371.923	191.912	339.027	201.003
Zfp493	51.7792	0.695717	0.764863	0.909597	0.363035	0.627552	4.0353	2.40799	2.04877	3.24801	4.94514	2.08511	5.11198	1.89085
Pcdha2	47.0427	0.695224	0.766296	0.907252	0.364274	0.628855	3.72372	2.13017	2.47265	2.57778	2.56414	1.63538	6.13438	2.17734
Trappc2l	567.277	0.695182	0.247559	2.80815	0.00498271	0.0449686	43.7574	26.8332	43.3067	25.0561	51.466	28.1694	36.4996	27.2741
Rasgrp1	2105.85	0.694388	0.178015	3.90074	9.59011e-05	0.00198272	163.027	99.0198	186.65	101.822	181.993	96.8554	120.438	98.3816
Tmem145	459.853	0.694194	0.275525	2.51953	0.0117513	0.0818539	35.3575	21.8657	34.6171	23.9734	31.9908	23.0589	39.4645	18.5647
Ccrn4l	878.922	0.693276	0.207089	3.34773	0.000814771	0.0113354	67.6681	41.703	70.3645	43.1006	73.7497	40.9254	58.8901	41.0831
Vps11	1370.98	0.693158	0.203154	3.41199	0.000644905	0.00940945	106.1	64.5016	102.438	68.3628	133.458	60.5091	82.4052	64.6328
Hspa12a	4425.84	0.692901	0.176045	3.93592	8.28771e-05	0.00175542	343.44	207.302	252.987	217.977	442.498	196.164	334.835	207.764
Smyd2	1547.27	0.692901	0.169291	4.09296	4.25898e-05	0.000986664	118.934	73.6055	126.246	74.3949	118.5	78.58	112.055	67.8415
Med12	550.292	0.692343	0.281571	2.45886	0.0139381	0.0918661	43.1323	25.3448	25.0797	24.3858	48.5966	25.3484	55.7206	26.3
Per2	595.83	0.692035	0.246825	2.80375	0.00505117	0.0453498	45.8028	28.3409	39.4211	23.6125	55.2512	28.5783	42.7362	32.8321
Atp2a2	6562.3	0.692006	0.150655	4.59331	4.36268e-06	0.000135026	505.759	310.839	408.623	324.285	561.059	279.854	547.596	328.378
Snap47	8114.06	0.691241	0.123559	5.59444	2.21336e-08	1.1343e-06	623.982	385.714	574.714	387.493	679.498	398.583	617.732	371.065
Chd7	928.02	0.691049	0.212556	3.25114	0.00114942	0.0149414	71.5408	43.94	62.664	41.5023	66.1793	47.9166	85.7791	42.4009
Hmgn3	654.989	0.690929	0.231819	2.98046	0.00287812	0.0304186	50.3833	31.1221	45.3554	31.2943	56.1059	29.9275	49.6885	32.1445
Gramd2	46.7103	0.690484	0.825156	0.836792	0.402709	0.662509	3.94538	1.86715	6.99406	2.16534	0.854715	1.71715	3.98735	1.71896
Elp2	1635.49	0.690296	0.19537	3.53328	0.000410435	0.00663919	126.628	76.8893	93.3955	79.0864	155.314	75.7181	131.174	75.8633
Ap2b1	5298.71	0.689961	0.153746	4.48768	7.20046e-06	0.00020947	409.959	249.401	314.874	250.664	511.974	257	403.029	240.539
Gpr45	259.219	0.689598	0.381014	1.8099	0.070311	0.257267	20.4208	11.8359	17.0966	12.6827	13.187	11.9383	30.9786	10.8867
Haus8	267.818	0.689397	0.335874	2.05255	0.0401163	0.183579	20.6233	12.7033	24.3026	13.3529	20.3911	11.693	17.1763	13.0641
Lepr	122.069	0.689215	0.519975	1.32548	0.185013	0.441491	9.95148	5.23855	7.3473	4.79468	18.3153	6.3371	4.19183	4.58388
Grap2	8.07187	0.688756	1.71041	0.402684	0.68718	0.854411	0.634142	0.370304	0.635824	0.309334	0.244204	0.572383	1.0224	0.229194
Mcf2	224.808	0.688751	0.377719	1.82345	0.0682357	0.253108	17.4175	10.5571	13.6349	11.136	23.0773	9.93494	15.5404	10.6002
Pld3	3015.22	0.688595	0.152002	4.53017	5.89354e-06	0.000175768	232.663	142.544	269.943	148.532	181.444	132.588	246.602	146.512
Npepl1	170.647	0.688111	0.413719	1.66323	0.0962656	0.305289	13.2401	7.99483	10.5264	7.99113	18.2543	8.83105	10.9396	7.16232
Mybbp1a	1013.76	0.687918	0.240259	2.86323	0.00419345	0.0400082	79.0378	47.1125	49.5943	48.2046	87.1199	48.3255	100.399	44.8075
Dopey1	1201.66	0.687798	0.219616	3.13183	0.00173723	0.0207402	93.6494	55.8828	65.5605	55.5255	130.222	56.5433	85.1656	55.5796
Tmem66	2275.03	0.687748	0.152465	4.51086	6.4565e-06	0.000190009	175.003	108.097	175.346	109.556	148.354	97.6731	201.31	117.061
Rrm1	384.749	0.687683	0.358774	1.91676	0.0552689	0.221674	30.8916	16.9857	12.3632	15.9823	44.3231	17.2124	35.9884	17.7625
Tbc1d4	339.711	0.687606	0.300244	2.29016	0.022012	0.12525	26.1651	16.1078	30.025	17.8898	28.0224	15.8223	20.4479	14.6111
Zc3h13	2881.02	0.687089	0.152034	4.51931	6.20425e-06	0.000183278	221.853	136.654	183.824	131.415	255.071	138.68	226.665	139.866
Sema4f	595.875	0.687079	0.245523	2.79843	0.00513516	0.0458659	45.86	28.2893	48.9585	26.9121	51.0997	28.9053	37.522	29.0504
Trpc7	211.647	0.686777	0.414911	1.65524	0.0978763	0.308013	16.7538	9.58316	26.8459	9.0738	12.2713	9.93494	11.1441	9.74075
Isyna1	859.221	0.686741	0.221418	3.10156	0.00192503	0.0224654	65.7761	41.1434	60.6152	48.8748	68.6214	37.0823	68.0916	37.4732
Tns1	997.876	0.686025	0.215693	3.18056	0.00146989	0.0181613	76.6802	47.4932	74.0382	51.6072	67.1562	49.6747	88.8463	41.1976
Dos	11166.9	0.685836	0.123935	5.53386	3.13265e-08	1.52504e-06	858.806	530.776	1004.46	557.626	797.083	500.222	774.874	534.481
Dsc1	7.22103	0.685727	2.48623	0.27581	0.782694	0.903252	0.814014	0.0845549	0	0	2.44204	0.081769	0	0.171896
Prune	638.26	0.685537	0.272799	2.51297	0.0119719	0.082835	49.5815	29.8421	51.9256	32.5832	64.4089	26.5749	32.41	30.3682
Fam96b	298.166	0.685144	0.338547	2.02378	0.0429929	0.190928	22.8212	14.2819	26.422	11.136	21.1847	16.3538	20.8569	15.356
Nbeal2	296.984	0.685049	0.318609	2.15012	0.0315454	0.158675	22.851	14.1051	27.0578	14.384	20.0247	13.4919	21.4703	14.4392
Tanc2	5900.99	0.684892	0.167384	4.09173	4.28158e-05	0.000988956	456.409	277.897	349.35	293.816	585.357	263.869	434.519	276.007
Anxa11	182.75	0.684307	0.423609	1.61542	0.10622	0.322496	14.3308	8.41022	14.3414	9.74402	20.5742	8.09513	8.07693	7.39151
Prepl	10585.3	0.683964	0.128797	5.31042	1.09376e-07	4.89298e-06	813.886	503.33	693.825	504.112	920.1	510.361	827.732	495.518
Med27	340.264	0.68376	0.313044	2.18423	0.0289452	0.149558	26.4317	15.91	32.2857	16.3947	17.1553	14.4322	29.854	16.9031
Ahsa2	300.277	0.683024	0.324061	2.1077	0.0350568	0.169282	23.0217	14.344	26.2807	15.5698	19.7805	15.6588	23.0039	11.8035
Astn2	707.427	0.682864	0.258382	2.64285	0.00822111	0.0645092	55.1031	32.9276	45.0729	34.0783	42.1252	33.0756	78.1111	31.6288
Tshr	18.0639	0.682265	1.15762	0.589367	0.555615	0.777009	1.37475	0.87309	1.55424	0.876447	1.34312	0.654152	1.22688	1.08867
Zcchc12	5735	0.68205	0.128685	5.30015	1.15708e-07	5.13201e-06	440.011	273.64	436.529	270.977	479.861	278.751	403.642	271.194
Hax1	820.472	0.68193	0.215304	3.16729	0.00153868	0.0187875	62.9118	39.1859	63.2998	39.7494	58.0596	41.8249	67.3759	35.9835
Rab11fip1	104.409	0.681582	0.510912	1.33405	0.182188	0.438512	8.03661	4.95585	9.25477	5.0009	6.47141	4.82437	8.38365	5.04227
1110007C09Rik	154.05	0.681458	0.450946	1.51117	0.130744	0.363274	11.8571	7.31252	15.5424	6.08357	10.6229	9.03548	9.40605	6.81853
Csad	273.83	0.681396	0.328672	2.07318	0.0381553	0.177946	20.9501	13.1247	22.7484	14.1778	20.5742	14.3096	19.5278	10.8867
D330023K18Rik	65.3038	0.68121	0.692228	0.984083	0.325075	0.591833	5.21806	2.90821	2.04877	3.1449	6.95982	2.65749	6.64558	2.92223
Irf3	195.505	0.681058	0.445181	1.52984	0.126055	0.356222	15.1821	9.14615	17.0966	7.63024	19.9637	8.46309	8.48589	11.3451
Ccdc79	16.3946	0.679435	1.42522	0.476723	0.633559	0.826218	1.53675	0.503357	1.13035	0.618668	3.47991	0.776806	0	0.114597
Jag2	668.237	0.679263	0.239321	2.83829	0.00453557	0.0421803	51.2046	31.9493	45.0022	34.7485	57.0827	28.4965	51.5288	32.6029
Dip2c	2815.26	0.678847	0.165853	4.09306	4.25723e-05	0.000986664	216.717	133.608	185.307	136.88	268.441	130.381	196.402	133.563
Dnmbp	582.883	0.678192	0.261652	2.59196	0.00954306	0.071289	45.1798	27.3528	29.2479	25.2623	54.7628	26.3705	51.5288	30.4255
Maob	616.8	0.678029	0.247024	2.74479	0.00605494	0.0518786	47.6617	29.0914	34.6171	27.1183	60.929	30.4181	47.4392	29.7379
Fxyd4	6.8083	0.677795	2.82516	0.239913	0.810397	0.917347	0.732613	0.114597	0	0	2.19784	0	0	0.343791
Pdia6	739.04	0.677583	0.222465	3.04579	0.00232068	0.0259387	56.7828	35.1816	53.4799	33.9752	49.3903	35.2424	67.4782	36.3273
C4b	56.9474	0.677571	0.680366	0.995892	0.319303	0.58633	4.33722	2.74919	2.61394	1.75289	6.41036	4.37464	3.98735	2.12005
Dad1	551.529	0.677482	0.279854	2.42084	0.0154847	0.0989188	42.5249	26.1062	46.1326	27.7885	51.5881	22.5683	29.854	27.9617
Dhx36	1688.28	0.676922	0.191257	3.53933	0.00040115	0.00653938	130.518	79.5684	90.4283	77.1273	151.651	81.6464	149.474	79.9315
Otof	407.411	0.676246	0.358438	1.88665	0.0592078	0.231629	32.4291	18.2683	14.9772	18.9209	49.6956	16.8035	32.6145	19.0804
Ppil2	814.567	0.675893	0.218576	3.09226	0.00198638	0.0230693	62.5241	38.8388	50.8659	38.873	74.2381	43.0923	62.4684	34.551
Slc5a6	249.135	0.675411	0.341893	1.9755	0.0482109	0.20462	19.0506	11.9512	18.015	12.6827	17.1553	9.93494	21.9815	13.236
Tgs1	788.154	0.674723	0.222321	3.0349	0.00240613	0.0267753	60.632	37.4441	46.3445	35.9859	67.7667	38.7585	67.7849	37.5878
Trim41	860.67	0.674388	0.218893	3.0809	0.00206375	0.0237461	66.1867	40.9131	55.246	40.4197	82.1747	40.721	61.1393	41.5987
1110021J02Rik	331.048	0.67405	0.305874	2.20368	0.0275467	0.145192	25.3129	15.882	22.5364	15.8276	27.2288	14.2278	26.1734	17.5907
Larp1	4669.42	0.674005	0.143219	4.70612	2.52473e-06	8.29536e-05	357.579	223.473	324.906	239.115	403.486	216.606	344.343	214.698
Xrn2	805.483	0.673862	0.239467	2.81401	0.00489273	0.0443881	62.0446	38.1879	48.9585	32.9441	83.0905	37.0414	54.0848	44.5783
Rft1	129.704	0.673697	0.49299	1.36655	0.171766	0.425509	10.0844	6.05566	8.26571	5.41335	7.26508	7.19567	14.7225	5.55796
Dom3z	176.731	0.67336	0.422772	1.59273	0.111222	0.331546	13.7208	8.2712	12.01	7.52713	9.82922	9.03548	19.3233	8.25099
Ubn1	1248.09	0.67297	0.190835	3.52645	0.000421165	0.00675251	95.5206	59.7892	103.639	57.0721	99.0859	58.4649	83.8365	63.8306
Supt3h	356.764	0.672897	0.308712	2.1797	0.0292801	0.150738	27.5185	16.8765	22.0419	15.6214	36.6917	16.8444	23.8218	18.1636
0610007N19Rik	60.0096	0.67287	0.658249	1.02221	0.30668	0.57509	4.59215	2.87531	5.36918	3.29956	3.60201	2.28953	4.80526	3.03682
Trmt112	829.692	0.672798	0.223042	3.01647	0.00255736	0.0278802	63.6155	39.6295	74.9566	37.3779	61.6005	39.4536	54.2893	42.0571
Lmbr1l	59.2579	0.672513	0.662705	1.0148	0.310201	0.578764	4.52995	2.84396	4.30947	2.88712	4.88408	3.06634	4.39631	2.57843
Arhgap31	511.556	0.672317	0.288085	2.33375	0.0196089	0.115941	39.6436	24.0133	27.3404	26.0872	54.5796	24.1219	37.0108	21.8307
5830418K08Rik	614.738	0.672203	0.238645	2.81675	0.00485129	0.0440892	47.031	29.4656	43.5186	25.6232	43.2852	32.1761	54.2893	30.5974
Ppp1r15a	423.204	0.672178	0.308166	2.18122	0.0291671	0.150305	32.5963	20.0662	24.5852	23.7672	29.854	17.5803	43.3496	18.8512
Adra2a	430.519	0.672015	0.313338	2.1447	0.0319771	0.159814	33.3106	20.2622	31.7912	19.9521	45.2388	18.3163	22.9017	22.5183
Sv2c	959.788	0.671971	0.198973	3.3772	0.000732278	0.0103826	73.5538	45.8801	60.8978	42.3788	80.2211	47.8758	79.5425	47.3859
4933408N05Rik	25.5507	0.671343	1.01415	0.661977	0.507986	0.743562	2.03053	1.14894	1.13035	1.08267	1.58733	1.39007	3.37391	0.974075
Fxyd6	1801.2	0.671341	0.184769	3.6334	0.000279709	0.00483834	138.684	85.4539	167.716	82.6953	103.359	83.0773	144.976	90.589
Camsap3	774.998	0.671231	0.237644	2.82452	0.00473513	0.0434906	59.7449	36.6942	66.1963	40.7805	42.1863	35.6104	70.8521	33.6915
Clpb	729.616	0.670965	0.233947	2.86802	0.00413044	0.0395222	55.9616	34.8302	63.5118	33.3565	45.483	37.0414	58.8901	34.0926
Bbx	1684.56	0.670756	0.179785	3.73089	0.000190807	0.00347831	129.446	80.1774	102.368	78.0038	156.535	80.706	129.435	81.8223
Lipa	229.465	0.670725	0.403245	1.66332	0.0962485	0.305289	17.9254	10.6287	9.8906	11.5485	24.6646	10.9979	19.2211	9.33966
Senp7	951.533	0.670468	0.196895	3.40521	0.000661122	0.00961004	72.6964	45.7103	72.8372	46.1423	74.6044	48.2437	70.6476	42.7447
Aldh1l1	557.779	0.670419	0.278829	2.40441	0.0161988	0.102016	43.6681	25.7407	24.6558	23.8187	64.2257	29.9683	42.1227	23.4351
Chrd	56.0465	0.670356	0.691668	0.969189	0.332451	0.598669	4.37968	2.59463	5.86371	2.99023	5.12829	2.9028	2.14703	1.89085
Stxbp5	2682.06	0.669991	0.165548	4.04712	5.18516e-05	0.00116483	206.018	127.732	201.486	128.735	251.042	126.742	165.526	127.718
Hist1h2ae	11.809	0.669813	1.68712	0.397016	0.691356	0.857065	1.15725	0.312234	0	0.257778	0.915766	0.44973	2.55599	0.229194
Zfp759	131.534	0.669469	0.457906	1.46202	0.143735	0.383306	10.076	6.29181	10.1025	6.70224	11.8439	6.50064	8.28141	5.67256
Qsox1	281.006	0.668821	0.328445	2.03633	0.0417175	0.187867	21.4868	13.4811	26.8459	15.4152	19.109	10.8753	18.5054	14.1527
Cc2d1b	652.095	0.668811	0.267842	2.49704	0.0125235	0.0854741	50.7731	30.3721	30.0957	29.4383	66.912	30.9087	55.3117	30.7693
Tada3	548.73	0.668727	0.258281	2.58914	0.00962158	0.0715666	42.1199	26.1628	34.8997	27.1183	51.8934	25.4711	39.5668	25.8989
Rasgrf1	8001.41	0.668551	0.135755	4.9247	8.44881e-07	3.11685e-05	612.441	383.237	528.158	390.637	689.694	367.552	619.47	391.521
Id1	77.4715	0.667345	0.591735	1.12778	0.259414	0.524114	5.87418	3.76619	5.08659	3.96979	8.24189	5.15145	4.29407	2.17734
Chpf2	460.113	0.667146	0.269629	2.47431	0.0133495	0.0893102	35.2072	22.0483	36.242	23.7672	29.915	22.0368	39.4645	20.341
Mks1	89.4332	0.666598	0.565095	1.17962	0.238151	0.500891	6.95897	4.1699	4.23883	4.12445	9.89027	4.66083	6.74782	3.7244
Gtpbp4	1349.55	0.666463	0.177926	3.74573	0.00017987	0.00330603	103.213	64.7222	85.5537	59.2375	107.633	62.9621	116.451	71.967
Nxf2	7.91312	0.666406	2.3932	0.278458	0.780661	0.902129	0.875065	0.109625	0	0.206223	2.6252	0.122654	0	0
Morn2	282.418	0.666245	0.373551	1.78354	0.0744979	0.266188	22.1033	13.0402	16.6021	12.5796	34.3717	12.1018	15.336	14.4392
Irak2	235.791	0.66613	0.359164	1.85467	0.0636432	0.242724	18.1192	11.222	21.4767	13.5076	12.6376	10.0167	20.2435	10.1418
Dmxl1	2071.68	0.666077	0.18741	3.55411	0.000379256	0.0062678	159.521	98.2732	115.437	97.8527	197.805	94.1161	165.322	102.851
Ctsa	408.819	0.666041	0.28427	2.34299	0.01913	0.113931	31.4821	19.3904	41.9644	21.0863	27.2288	19.0931	25.2532	17.9917
Tmem42	96.5349	0.665593	0.544043	1.22342	0.221171	0.48223	7.57922	4.43338	11.3035	5.25868	7.75348	4.66083	3.68063	3.38061
Prmt2	3331.86	0.665535	0.147208	4.52105	6.15335e-06	0.000182121	254.918	159.691	277.078	157.245	214.9	157.037	272.775	164.791
Pkm2	25043.5	0.664894	0.128406	5.17805	2.24215e-07	9.35812e-06	1917.54	1198.81	1662.68	1224.04	2277.45	1196.24	1812.5	1176.17
Prkdc	585.106	0.664754	0.364654	1.82297	0.0683075	0.253174	47.4401	25.3692	15.1185	26.0872	69.2319	24.4081	57.9699	25.6124
Nkrf	946.244	0.664305	0.22525	2.94918	0.00318614	0.0327189	72.9937	44.7548	52.2789	44.8534	95.8502	46.036	70.8521	43.375
Wdr19	394.642	0.664199	0.288766	2.30013	0.0214409	0.122853	30.1242	18.9842	26.634	20.7254	33.5781	17.3759	30.1607	18.8512
AI467606	45.76	0.664171	0.795187	0.835239	0.403583	0.663326	3.69815	1.99612	6.49953	1.856	1.22102	1.26742	3.37391	2.86493
G3bp1	1393.17	0.663842	0.180416	3.67951	0.000233685	0.00413409	106.445	66.9177	93.6074	68.6206	118.683	68.0727	107.045	64.0598
Bcdin3d	69.9745	0.66358	0.745779	0.889781	0.373584	0.637592	5.44055	3.26691	7.13536	2.52623	7.44823	2.28953	1.73807	4.98497
Adnp2	754.282	0.662756	0.22808	2.90581	0.00366302	0.0365785	57.6597	36.2014	48.04	38.409	63.4931	34.6701	61.446	35.5251
Ncor1	5971.68	0.662562	0.148368	4.46568	7.9816e-06	0.000228415	457.624	285.478	357.969	289.279	517.713	283.125	497.192	284.029
Cyp2t4	28.6472	0.662454	0.939862	0.704841	0.480909	0.72601	2.19026	1.37453	1.83682	1.54667	2.07574	1.43096	2.65823	1.14597
Phka1	567.474	0.662379	0.253675	2.61113	0.00902443	0.0687677	43.7036	26.9115	30.8021	23.4578	57.2659	28.4556	43.0429	28.8212
1110005A03Rik	62.9835	0.662365	0.657768	1.00699	0.31394	0.581282	4.83414	3.00339	5.22789	3.81512	6.10511	2.61661	3.16943	2.57843
Plat	152.407	0.661872	0.426708	1.55111	0.120875	0.348349	11.6358	7.32942	9.96124	6.96002	12.8818	8.09513	12.0643	6.93312
Eepd1	94.1594	0.661503	0.539276	1.22665	0.219954	0.481542	7.09559	4.6214	6.1463	4.17601	6.65456	3.27076	8.48589	6.41744
Zfp473	20.0182	0.661492	1.16041	0.570048	0.568645	0.7864	1.69087	0.800149	3.603	0.928002	0.549459	0.899459	0.920157	0.572985
Wdr5	497.168	0.661051	0.255548	2.5868	0.00968728	0.0719071	38.0355	23.8311	29.3186	20.9316	40.4158	23.6312	44.372	26.9303
Ipo5	3133.68	0.661019	0.141907	4.65811	3.19124e-06	0.000102015	239.064	150.885	217.452	148.016	257.635	156.751	242.104	147.888
Gns	1277.41	0.661014	0.180519	3.66173	0.000250516	0.00440185	97.5959	61.3623	109.715	67.1255	80.5263	55.7665	102.546	61.1948
Pla2g6	418.099	0.660945	0.279884	2.36149	0.0182015	0.110558	32.0078	20.0195	31.226	21.0347	38.8285	20.1152	25.9689	18.9085
Tbx5	48.6631	0.660541	0.781639	0.845072	0.398071	0.658712	3.90475	2.15078	1.48359	2.32001	2.8694	1.26742	7.36126	2.86493
Gbp6	44.8802	0.660449	0.79239	0.83349	0.404568	0.664099	3.52845	2.05634	3.10847	1.54667	5.7388	2.33042	1.73807	2.29194
Xrcc6	331.579	0.659823	0.320576	2.05824	0.0395666	0.182152	25.6406	15.6204	23.031	16.7556	36.2033	16.3538	17.6875	13.7516
Grk1	32.1285	0.659803	0.944208	0.698789	0.484684	0.728416	2.69099	1.30701	0.635824	1.08267	5.49459	1.92157	1.94255	0.916777
Gys1	333.831	0.65979	0.331865	1.98813	0.0467975	0.201275	25.806	15.7352	22.6071	16.3947	36.2033	14.882	18.6076	15.929
Megf8	2501.29	0.659534	0.17066	3.8646	0.000111271	0.00224096	191.057	120.198	156.059	128.631	201.591	108.426	215.521	123.536
Jup	704.862	0.659432	0.262956	2.50776	0.0121498	0.0837307	54.5861	33.1254	42.3883	35.5219	78.6338	31.7673	42.7362	32.0872
Wars	1705.09	0.658569	0.206688	3.18629	0.00144108	0.0178633	131.952	80.2247	101.449	81.6642	187.976	79.4795	106.432	79.5304
Apoa2	23.7814	0.658157	1.29913	0.506615	0.612425	0.813745	2.31442	0.644882	0.777118	0.257778	6.16616	1.10388	0	0.572985
Lonrf2	7271.73	0.657702	0.136289	4.82579	1.39446e-06	4.82422e-05	554.585	350.293	497.426	372.077	627.116	341.14	539.212	337.66
Mesdc1	1130.73	0.65766	0.193014	3.40732	0.000656043	0.00954511	86.2573	54.4477	95.303	56.5566	75.0317	55.8482	88.4373	50.9384
Plekha6	4221.76	0.657647	0.150238	4.37736	1.20126e-05	0.00032563	322.238	203.108	274.111	214.729	330.469	197.717	362.133	196.878
Abr	10731.1	0.657233	0.13406	4.90253	9.46087e-07	3.44128e-05	819.372	515.979	703.221	528.446	944.032	502.716	810.863	516.776
Spsb2	84.5413	0.656495	0.612259	1.07225	0.283608	0.550891	6.86139	3.65874	13.2817	4.22757	3.72411	4.17022	3.57839	2.57843
Nup88	1189.92	0.65587	0.187329	3.50116	0.000463239	0.00724795	90.6762	57.3948	94.4552	57.7939	97.3154	56.4615	80.2581	57.9288
G3bp2	8587.98	0.655775	0.145691	4.50113	6.75927e-06	0.000197426	658.425	410.244	488.101	399.608	772.723	412.443	714.451	418.68
Ahctf1	1161.67	0.655711	0.265139	2.47308	0.0133953	0.0895012	92.0158	52.5397	46.3445	50.3699	146.889	51.8416	82.8141	55.4077
4930526I15Rik	158.434	0.655688	0.422453	1.5521	0.120639	0.347862	12.1273	7.58783	9.60801	6.39291	11.2334	8.1769	15.5404	8.19369
Qpct	218.778	0.655657	0.376591	1.74103	0.0816782	0.278669	16.9053	10.3189	16.8847	9.17691	10.6229	9.40344	23.2084	12.3765
Snx32	931.49	0.655238	0.210714	3.10961	0.00187332	0.0220437	71.4649	44.4476	66.7615	44.6472	55.6175	41.2525	92.0157	47.4432
Ctnnd1	1240.29	0.654179	0.237737	2.7517	0.00592875	0.0509657	96.0274	58.3117	60.1207	59.289	130.527	53.1907	97.4344	62.4554
Ddx49	248.771	0.654145	0.340222	1.9227	0.0545177	0.219822	18.9149	12.0416	20.1344	12.9405	19.5363	12.756	17.074	10.4283
Gnb2l1	2880.78	0.654084	0.14421	4.53564	5.74294e-06	0.000171935	219.11	139.368	237.586	152.811	207.085	138.721	212.659	126.572
Ccdc14	84.1169	0.653998	0.611458	1.06957	0.284812	0.552174	6.67468	3.79264	7.84183	4.22757	9.52396	3.59784	2.65823	3.55251
Slc6a5	1.93865	0.653865	3.88838	0.168159	0.866458	NA	0.164843	0.0763981	0.49453	0	0	0	0	0.229194
Pcdhb19	94.7861	0.653827	0.557424	1.17295	0.240818	0.503324	7.40366	4.39131	3.81494	3.96979	10.0124	4.33376	8.38365	4.87038
Pccb	743.719	0.653811	0.227812	2.86996	0.00410524	0.039378	56.6701	35.8767	53.056	36.6561	65.6299	33.4435	51.3243	37.5305
Tuba1a	4715.11	0.653671	0.14202	4.60267	4.17106e-06	0.000129611	359.551	227.186	310.141	234.269	422.534	240.442	345.979	206.848
Rae1	575.77	0.653662	0.2572	2.54146	0.0110392	0.0781885	44.2109	27.4366	31.0141	26.4481	52.7481	27.5562	48.8706	28.3055
Iqsec1	9958	0.653658	0.144713	4.51693	6.27417e-06	0.000184993	759.982	479.169	638.155	515.815	898.305	461.872	743.487	459.821
2610301G19Rik	2409.84	0.652301	0.163376	3.99263	6.53442e-05	0.00143077	183.761	116.113	152.739	119.351	193.043	109.979	205.502	119.009
Lig4	332.438	0.652253	0.359171	1.81599	0.0693713	0.255192	25.6578	15.7101	14.8359	17.1165	30.6476	17.8665	31.4898	12.1473
Mdm1	114.909	0.652003	0.527808	1.2353	0.216718	0.478223	8.98743	5.31165	4.52142	5.4649	15.0796	7.03214	7.36126	3.43791
Hecw2	1605.86	0.651957	0.217854	2.99263	0.00276583	0.0295934	124.619	75.2102	85.1298	74.498	182.604	74.4098	106.125	76.7227
Tchp	451.722	0.651896	0.302969	2.15169	0.0314218	0.158206	35.1039	21.1074	39.4211	19.9521	19.7805	20.2787	46.1101	23.0913
Ctps	1104.2	0.65172	0.206978	3.14874	0.00163974	0.0198503	84.4996	52.9049	64.9953	52.4837	86.5704	54.9488	101.933	51.2822
Cldn22	4.86306	0.650625	2.91207	0.223423	0.823206	0.923367	0.488408	0.11674	0	0.309334	1.46523	0.0408845	0	0
Tuba4a	5330.27	0.650433	0.146297	4.44599	8.74866e-06	0.000245847	406.991	256.295	386.369	264.532	494.147	253.443	340.458	250.91
Psma1	874.859	0.650189	0.211617	3.07248	0.00212286	0.0242826	66.5411	42.3243	59.6968	45.4721	67.9498	41.048	71.9767	40.4528
Dak	169.148	0.650102	0.451607	1.43953	0.15	0.393264	13.2173	7.83113	16.8847	8.1458	6.71562	8.01336	16.0516	7.33421
Letm1	1777.29	0.649542	0.169328	3.836	0.000125055	0.00244887	135.135	86.027	146.24	80.0144	121.858	86.389	137.308	91.6777
Plagl2	230.337	0.649438	0.370101	1.75476	0.0793002	0.2741	17.6933	10.9693	23.9494	10.8267	14.408	10.7935	14.7225	11.2878
Zfyve26	581.923	0.649337	0.335222	1.93703	0.0527414	0.215619	45.99	26.4232	19.7812	28.7165	51.2218	23.7948	66.967	26.7584
Vps16	931.857	0.649266	0.242129	2.68149	0.00732957	0.0593997	71.8006	44.1576	51.7843	46.8641	99.5132	42.2337	64.1043	43.375
Pcdhb9	58.6285	0.64921	0.682226	0.951605	0.341298	0.607306	4.47942	2.81618	5.72242	2.32001	2.80835	2.28953	4.9075	3.839
Pcsk1n	16224.5	0.649091	0.113519	5.71792	1.07837e-08	5.82916e-07	1233.56	785.387	1367.3	843.348	1135.73	739.11	1197.64	773.702
Sytl5	193.796	0.648927	0.4748	1.36674	0.171707	0.425455	15.4672	8.64829	5.58112	9.28002	19.9637	8.58575	20.8569	8.07909
Lzts1	330.883	0.648815	0.302973	2.14149	0.0322343	0.160687	25.2574	15.9169	31.5793	17.6836	20.2689	14.0234	23.9241	16.0436
Arg2	52.9853	0.648757	0.730937	0.88757	0.374772	0.638552	4.12157	2.4718	3.46171	3.1449	2.56414	2.20776	6.33886	2.06275
Stat2	323.639	0.64816	0.331786	1.95355	0.0507547	0.210627	25.1863	15.0866	14.412	13.1983	36.8138	16.4765	24.333	15.5852
Kif21a	10752.7	0.648133	0.134323	4.82519	1.39872e-06	4.82821e-05	819.63	518.416	714.242	527.672	974.68	513.264	769.967	514.312
Myh11	74.7705	0.648099	0.596132	1.08717	0.27696	0.543855	5.65868	3.6456	5.22789	3.40268	6.22721	4.4973	5.52094	3.03682
Ndn	8576.96	0.647765	0.133417	4.85518	1.20278e-06	4.21732e-05	649.907	417.391	641.758	344.701	599.338	434.071	708.623	473.401
Taf10	732.146	0.647541	0.230212	2.8128	0.00491115	0.0444775	55.9078	35.1989	69.5168	35.1094	52.1986	37.0823	46.0079	33.405
Jsrp1	30.8776	0.647255	1.26533	0.511529	0.608981	0.811557	2.8664	0.97593	0	1.34045	1.95363	0.613268	6.64558	0.974075
Zfc3h1	882.801	0.646991	0.21846	2.9616	0.00306044	0.0317026	67.5165	42.3372	49.5236	40.6774	78.0843	45.1365	74.9417	41.1976
Esr1	260.688	0.646684	0.359881	1.79694	0.0723458	0.262047	19.8184	12.6209	15.8956	15.0543	20.1468	11.9792	23.4129	10.8294
C2cd3	928.948	0.646566	0.211131	3.06239	0.00219577	0.0249182	70.9219	44.6744	57.648	44.5441	68.3161	43.5829	86.8015	45.8961
9830001H06Rik	3828.45	0.646534	0.153862	4.20204	2.64518e-05	0.000650554	291.425	184.98	262.313	200.809	346.343	179.197	265.619	174.932
Exoc4	1239.98	0.646515	0.21411	3.01955	0.00253151	0.0277535	95.1369	59.1639	65.2779	60.1655	112.883	58.9963	107.249	58.3299
Dopey2	1818.72	0.646504	0.208225	3.10484	0.00190382	0.0223015	139.735	86.5822	111.128	97.8011	194.081	82.3005	113.997	79.645
Lect1	13.1752	0.646162	1.37792	0.468938	0.639114	0.829492	1.02755	0.61194	1.41294	0.928002	1.46523	0.735921	0.204479	0.171896
Zfp934	42.7323	0.645901	0.780872	0.827153	0.40815	0.667235	3.27561	2.0419	4.38012	2.01067	2.68625	2.16688	2.76047	1.94815
Micalcl	44.0502	0.645826	0.76168	0.847897	0.396495	0.657409	3.33498	2.14653	3.10847	2.06223	3.1136	1.79892	3.78287	2.57843
Tarm1	1.88195	0.644631	3.88991	0.165719	0.868378	NA	0.0706471	0.163538	0.211941	0	0	0.490614	0	0
Ifih1	44.1243	0.64408	0.784977	0.820508	0.411926	0.670662	3.47444	2.01629	5.79306	2.11378	2.38099	2.04423	2.24927	1.89085
Usp13	722.761	0.643995	0.228152	2.82266	0.00476274	0.0436235	54.9101	35.0287	52.9147	34.9548	62.6384	33.1165	49.1773	37.0149
Tmem179	1346.25	0.643746	0.190973	3.37087	0.000749309	0.0105759	102.165	65.3596	90.4283	69.6002	112.395	58.1787	103.671	68.2999
Cdipt	786.238	0.643736	0.213372	3.01697	0.00255315	0.027862	59.718	38.1197	66.0551	39.0277	55.1291	38.7176	57.9699	36.6138
Gabra6	2.58646	0.643622	3.88955	0.165475	0.86857	NA	0.264555	0.0572985	0	0	0.793664	0	0	0.171896
Pfkfb4	275.912	0.643583	0.378834	1.69885	0.0893472	0.292586	21.3355	12.9984	12.01	14.2809	26.1299	13.3692	25.8666	11.3451
9430023L20Rik	425.33	0.643547	0.283102	2.2732	0.0230142	0.129019	32.5727	20.3543	21.1235	17.1165	39.0727	24.6942	37.522	19.2523
Sdha	10559.9	0.643322	0.129083	4.9838	6.23487e-07	2.34455e-05	803.009	511.044	684.359	515.093	898.061	521.891	826.608	496.148
Myo1b	355.059	0.642985	0.303508	2.11851	0.034132	0.166875	27.1381	17.0447	24.9384	18.3023	21.6121	15.6997	34.8637	17.1323
Ndufa7	621.891	0.642631	0.252357	2.54652	0.0108803	0.0775213	47.1187	30.2681	48.6759	25.3654	40.5379	35.2424	52.1422	30.1963
Nfe2l2	193.708	0.642539	0.407767	1.57575	0.115083	0.338871	14.6998	9.40478	11.1622	9.12536	18.0101	7.4001	14.927	11.6889
6430598A04Rik	3004.47	0.641803	0.145375	4.4148	1.01103e-05	0.00027957	227.905	145.965	216.745	150.388	243.166	141.338	223.803	146.169
Sufu	292.472	0.641648	0.350153	1.83248	0.0668801	0.249387	22.7311	13.6635	13.3523	13.2498	34.1886	15.5361	20.6524	12.2046
Fam116b	313.453	0.64122	0.325723	1.96861	0.0489982	0.206553	23.7658	15.2396	18.5095	12.064	23.1383	19.5019	29.6495	14.1527
Rsl1	39.8646	0.641211	0.839693	0.763626	0.44509	0.69846	3.18152	1.77915	3.10847	1.44356	5.31144	2.28953	1.12464	1.60436
Exosc9	659.938	0.641088	0.233137	2.74984	0.00596244	0.051227	50.3306	31.7906	37.8669	27.5823	62.5163	33.8115	50.6086	33.978
Heatr7a	1262.32	0.64096	0.179519	3.57043	0.000356401	0.00593418	95.665	61.4156	97.705	66.0944	97.3764	59.6505	91.9135	58.5018
Khk	102.771	0.640824	0.525985	1.21833	0.223099	0.483638	7.9623	4.8263	4.66271	4.22757	7.87559	4.86526	11.3486	5.38606
Susd2	279.203	0.640423	0.392717	1.63075	0.102943	0.31779	21.7988	12.9447	10.1732	13.5591	22.711	9.68963	32.5122	15.5852
Vps35	2362.5	0.640307	0.167895	3.81372	0.000136889	0.00261804	180.47	113.513	136.985	104.864	228.88	117.87	175.546	117.806
4930572J05Rik	450.231	0.639768	0.284708	2.2471	0.0246335	0.134916	34.3713	21.6544	25.221	22.6329	36.9969	20.4423	40.8959	21.888
Fam38a	24.8609	0.639644	1.02895	0.621649	0.534173	0.762269	1.99374	1.0999	1.05971	1.08267	1.34312	1.18565	3.57839	1.03137
Unc80	12155.6	0.639455	0.166167	3.84826	0.000118958	0.00235315	932.811	579.804	646.492	595.674	1219.62	565.883	932.324	577.856
Selenbp1	51.0928	0.639001	0.759997	0.840794	0.400463	0.660314	4.16422	2.19365	3.46171	2.11378	1.46523	2.00334	7.56574	2.46384
Romo1	774.252	0.638712	0.214618	2.97604	0.00292002	0.0307986	58.7096	37.6366	58.5665	35.7281	53.9691	38.3906	63.5931	38.7911
Spen	4272.22	0.638677	0.144547	4.41848	9.93965e-06	0.000275339	325.15	206.475	256.873	197.304	350.311	208.225	368.267	213.895
Hist2h3c2	8.06308	0.638399	1.94459	0.328295	0.742689	0.883824	0.8037	0.199652	0	0.206223	0.366306	0.163538	2.04479	0.229194
Sema3d	112.383	0.638362	0.505946	1.26172	0.20705	0.467481	8.67579	5.3089	6.28759	5.41335	6.95982	4.78349	12.78	5.72985
1810048J11Rik	617.184	0.638266	0.247904	2.57465	0.0100341	0.0735112	47.1161	29.6849	43.5186	32.4801	36.9969	26.7794	60.8326	29.7952
Jak2	1026.38	0.63824	0.201176	3.17254	0.00151111	0.0185348	77.8197	49.9003	83.7875	47.5859	69.7203	53.6405	79.9514	48.4746
Tor3a	97.3681	0.6378	0.629841	1.01264	0.311234	0.579878	8.32766	3.78861	16.6727	4.33068	6.77667	4.17022	1.5336	2.86493
Psen2	199.991	0.63759	0.390403	1.63316	0.102435	0.316662	15.4007	9.48574	9.18412	8.09424	19.8416	10.2211	17.1763	10.1418
6030405A18Rik	415.131	0.637588	0.325581	1.95831	0.0501936	0.209209	32.0394	19.6186	46.839	18.5085	21.3679	22.5274	27.9114	17.8198
Tmprss11g	8.57779	0.637551	2.33639	0.272879	0.784946	0.904384	0.988317	0.0790835	0	0	0	0.122654	2.96495	0.114597
Celsr3	919.461	0.637533	0.2365	2.69571	0.00702397	0.0577955	70.3209	44.0948	54.6102	49.081	62.3942	41.0889	93.9583	42.1144
Tbc1d9	2748.75	0.6375	0.151669	4.20323	2.6313e-05	0.000648165	208.635	133.413	222.468	135.334	225.95	133.406	177.488	131.5
Pigs	489.911	0.637208	0.29816	2.13713	0.032587	0.161921	37.5062	23.4573	42.6002	23.3032	45.483	21.3417	24.4353	25.727
Rangap1	7595.03	0.636205	0.128615	4.94658	7.55297e-07	2.79963e-05	575.747	369.362	533.456	383.42	645.065	371.19	548.72	353.475
Rgl2	140.38	0.63609	0.485394	1.31046	0.19004	0.447246	10.7489	6.71973	6.71148	8.04269	13.6754	5.92825	11.8598	6.18824
Kdm5a	1719.46	0.635752	0.250821	2.53468	0.011255	0.0792926	134.89	79.0764	68.8809	79.3442	206.353	74.8595	129.435	83.0256
Pop5	593.125	0.635562	0.258666	2.45707	0.0140074	0.0922062	45.0774	28.7297	48.1107	29.2836	35.5928	31.2358	51.5288	25.6697
Acox1	3592.17	0.63418	0.152332	4.16315	3.1388e-05	0.000762323	273.215	173.786	244.227	171.99	338.223	177.357	237.196	172.01
Rad18	164.58	0.633989	0.421083	1.50561	0.132166	0.365919	12.6977	7.78226	7.27665	6.08357	12.5155	7.80894	18.3009	9.45426
Ttll12	372.547	0.633826	0.29236	2.16796	0.0301614	0.15375	28.1841	18.1748	29.5305	20.4161	30.5866	16.2312	24.4353	17.8771
C630004H02Rik	1404.98	0.633308	0.174767	3.62372	0.000290396	0.00498444	106.337	68.4957	115.014	71.1468	100.429	70.2805	103.569	64.0598
Dph2	166.828	0.633161	0.413333	1.53184	0.125561	0.35573	12.5991	8.1606	11.3035	7.06313	14.2249	7.84983	12.2688	9.56886
Hspa12b	93.2532	0.632789	0.557297	1.13546	0.256182	0.520645	7.28889	4.31534	5.01595	4.5369	12.4544	5.31499	4.39631	3.09412
Mphosph8	1330.47	0.632221	0.18648	3.39028	0.000698201	0.0100366	100.92	64.6409	77.4999	53.4632	122.407	65.7423	102.853	74.7173
Aplp2	5504.49	0.631764	0.138873	4.54922	5.38452e-06	0.000162769	418.131	266.835	341.861	260.459	404.707	250.745	507.824	289.3
Tut1	473.806	0.631338	0.282428	2.23539	0.0253918	0.137795	36.3458	22.6136	23.8787	20.8801	48.3524	22.8953	36.8063	24.0654
Mthfd1	821.646	0.631206	0.219068	2.88133	0.00396005	0.038478	62.4451	39.7987	49.1704	37.7903	64.3478	42.3564	73.817	39.2495
Gpr151	8.71849	0.631194	1.89269	0.333491	0.738764	0.88141	0.847159	0.23775	0.282588	0.206223	2.25889	0.44973	0	0.0572985
Sec23ip	1096.55	0.630387	0.208268	3.02681	0.00247151	0.0272954	83.5592	52.8935	62.3814	51.1948	104.153	52.8228	84.1433	54.6628
Hmbs	179.315	0.630355	0.472455	1.33421	0.182134	0.438451	14.5079	7.80576	26.7046	7.73335	6.28826	7.31833	10.5307	8.36559
Slc39a6	650.187	0.630221	0.232459	2.71111	0.00670585	0.0556486	49.2541	31.6537	56.8709	31.8099	46.8262	30.9496	44.0653	32.2018
Hmgcs1	4513.66	0.630084	0.157984	3.98829	6.65524e-05	0.0014511	344.096	217.574	276.301	202.769	450.801	220.817	305.185	229.137
Ap1g1	2392.58	0.628691	0.175023	3.59205	0.000328088	0.00553977	181.621	116.106	178.384	118.733	219.356	109.489	147.123	120.098
Plekhg6	11.9111	0.628508	1.71158	0.367209	0.713463	0.868476	1.21709	0.265107	3.03783	0.206223	0	0.245307	0.613438	0.343791
Faf1	1075.15	0.628239	0.236887	2.65207	0.00800007	0.0633173	83.0501	50.7388	48.04	48.6686	114.104	53.3543	87.006	50.1935
Clasp1	3834.97	0.62794	0.147442	4.25889	2.05443e-05	0.000522604	290.303	186.912	247.406	191.993	306.049	177.48	317.454	191.263
Mest	1022.36	0.627659	0.205072	3.06067	0.00220839	0.0250395	77.1824	50.0381	66.5496	51.401	80.3432	42.5608	84.6544	56.1526
Lrrk1	82.0604	0.627501	0.582644	1.07699	0.281485	0.549098	6.19728	4.01413	6.42889	3.24801	5.00619	4.78349	7.15678	4.0109
P4ha3	185.788	0.62731	0.434739	1.44296	0.149032	0.391886	14.7394	8.37974	12.4339	8.1458	6.83772	7.48187	24.9465	9.51156
Mgat4b	464.723	0.627262	0.271267	2.31234	0.0207589	0.120395	35.2288	22.6002	42.5296	21.9627	31.2581	24.1219	31.8988	21.7161
Yars2	202.47	0.627117	0.410609	1.52729	0.12669	0.357456	15.3286	9.86633	10.7384	10.8782	18.0711	7.31833	17.1763	11.4024
Wdr33	1460.49	0.627	0.193987	3.23218	0.0012285	0.0157556	111.157	70.5831	81.7387	69.6002	132.725	70.2396	119.007	71.9097
Dcaf12l1	1334.87	0.626422	0.181525	3.45089	0.000558746	0.00840886	100.821	65.2877	93.2542	69.1877	105.435	65.5379	103.773	61.1375
Fdxacb1	75.989	0.62624	0.621246	1.00804	0.313435	0.581108	5.93898	3.51692	8.6896	4.38223	2.68625	3.18899	6.4411	2.97952
Ubc	1749.34	0.625876	0.166856	3.751	0.000176131	0.00326002	132.036	85.6483	153.092	99.8634	116.852	83.8541	126.164	73.2275
Pik3r3	1511.53	0.625669	0.189473	3.30215	0.000959482	0.0130229	115.1	72.9907	91.6293	70.9922	150.308	75.5546	103.364	72.4254
Dhx57	1094.52	0.625664	0.230353	2.71611	0.00660548	0.0552781	83.9621	52.2373	58.849	52.2775	117.584	50.8603	75.4529	53.5741
Crmp1	3235.44	0.625214	0.140068	4.46363	8.05809e-06	0.000229498	244.233	158.378	243.733	166.576	235.718	151.845	253.248	156.712
Itpr1	3656.41	0.625207	0.14339	4.36019	1.29949e-05	0.000348801	276.299	178.696	250.939	186.838	264.901	162.802	313.058	186.449
Als2cr4	329.737	0.62438	0.335805	1.85935	0.0629772	0.241129	25.2576	15.7742	35.1116	14.4356	23.3826	17.703	17.2785	15.1841
Six2	30.7227	0.624023	1.01799	0.612997	0.539878	0.765467	2.37618	1.44689	0.706471	2.32001	3.96832	1.10388	2.45375	0.916777
Elovl5	525.775	0.623995	0.251311	2.48296	0.0130297	0.0878501	39.6318	25.7945	39.7037	27.1698	39.0116	27.6379	40.1802	22.5756
Tpp2	1118.21	0.623984	0.218708	2.85304	0.00433026	0.0408567	85.2463	53.9011	59.2023	53.9788	104.214	51.5145	92.3224	56.2099
Selplg	52.4207	0.623929	0.715432	0.872102	0.383153	0.645686	4.028	2.49512	2.47265	2.21689	4.09042	2.86192	5.52094	2.40654
Tep1	158.604	0.623862	0.48907	1.27561	0.202094	0.462431	12.5649	7.17141	16.6727	9.17691	16.728	6.09179	4.29407	6.24554
Lrrc24	280.307	0.623851	0.343161	1.81796	0.069071	0.254474	21.2098	13.671	24.6558	12.1671	17.0943	15.4952	21.8793	13.3506
Neurl1b	396.824	0.623683	0.277855	2.24464	0.0247915	0.135233	29.9289	19.451	29.8131	18.1992	29.915	19.5837	30.0585	20.5702
Spg11	696.026	0.623439	0.281396	2.21552	0.0267242	0.142347	53.7835	32.8284	29.3892	33.6659	61.7226	32.7894	70.2387	32.0299
Fbxo36	66.6249	0.623384	0.626447	0.995111	0.319682	0.586681	5.02435	3.2663	5.01595	3.19645	4.94514	3.10722	5.11198	3.49521
Tmem63c	348.001	0.623328	0.304728	2.04552	0.0408037	0.185307	26.4591	16.8454	34.3345	20.0036	26.4351	15.0046	18.6076	15.5279
Hbb-y	2.1641	0.623269	3.51487	0.177323	0.859255	NA	0.162356	0.10694	0.282588	0.206223	0	0	0.204479	0.114597
Cct5	4750.25	0.623043	0.162312	3.83856	0.000123758	0.00242959	362.053	229.058	260.264	222.308	460.081	229.771	365.814	235.096
Dhx15	1713.74	0.622978	0.205989	3.02432	0.00249191	0.0274415	131.902	81.3517	92.6184	81.3033	194.509	86.1437	108.579	76.6081
Wwp2	954.107	0.622264	0.215321	2.88994	0.00385315	0.0377745	72.3581	46.3688	88.1676	44.3379	71.8571	49.6747	57.0497	45.0939
Sft2d3	146.557	0.62165	0.477041	1.30314	0.192528	0.45068	11.4355	6.8017	8.40701	6.34135	18.7427	6.78683	7.15678	7.27691
Nfkbil1	329.942	0.621539	0.30255	2.05433	0.0399434	0.183379	24.888	16.1692	27.0578	15.776	24.9088	17.6621	22.6972	15.0695
4932441J04Rik	9.87057	0.621159	1.5738	0.394687	0.693074	0.857737	0.746871	0.481401	0.282588	0.773335	1.03787	0.327076	0.920157	0.343791
Slc4a8	2214.43	0.62087	0.152606	4.06845	4.73273e-05	0.00107876	166.992	108.566	163.124	111.927	159.649	101.925	178.204	111.847
Nefl	11121.2	0.620658	0.135068	4.59516	4.32408e-06	0.000134098	843.054	540.839	654.334	520.145	900.381	556.029	974.446	546.342
Sgsm2	2066.01	0.620183	0.170601	3.63528	0.000277684	0.00480865	156.357	100.733	161.005	101.719	128.329	102.211	179.737	98.267
Kbtbd3	221.237	0.619958	0.371495	1.66882	0.0951526	0.302932	16.8444	10.6858	11.6568	10.1565	20.2689	10.957	18.6076	10.944
Mab21l1	105.009	0.619943	0.5071	1.22253	0.221509	0.482233	7.93185	5.13518	8.6896	5.67113	9.58502	6.01002	5.52094	3.7244
Dhx30	2309.17	0.619627	0.15859	3.9071	9.34113e-05	0.00194808	174.346	113.002	167.504	118.991	199.21	111.492	156.324	108.523
Parp9	31.7149	0.619458	0.889545	0.696376	0.486193	0.729196	2.39167	1.55486	2.5433	1.392	2.07574	1.55361	2.55599	1.71896
Acacb	171.064	0.618608	0.418337	1.47873	0.139212	0.376391	12.9157	8.37105	10.6677	9.69247	16.1175	8.54486	11.962	6.87582
1110001A16Rik	158.046	0.617923	0.418121	1.47786	0.139446	0.376565	11.9023	7.76461	11.6568	7.2178	12.0881	8.05425	11.962	8.0218
Gpr108	157.081	0.617715	0.426621	1.44792	0.147638	0.389829	11.9001	7.64673	10.4558	7.01157	10.3176	8.13602	14.927	7.7926
Apc	6077.52	0.617118	0.151949	4.06135	4.87902e-05	0.00110724	461.391	294.882	348.502	284.072	574.979	293.51	460.692	307.063
Plekhg2	74.3837	0.616735	0.638779	0.96549	0.3343	0.600363	5.76499	3.49115	6.28759	3.96979	2.93045	3.63872	8.07693	2.86493
Cc2d2a	711.641	0.616465	0.23774	2.59303	0.00951358	0.0711029	53.7306	34.8245	44.1544	38.0997	61.1121	33.4844	55.9251	32.8894
Hmgn1	1891.68	0.616415	0.173562	3.55155	0.000382971	0.00630909	143.173	92.2229	138.539	91.5113	118.195	92.2763	172.785	92.8809
Oplah	318.87	0.616141	0.416979	1.47763	0.139507	0.376637	25.8228	13.8566	9.8906	14.5387	47.4367	13.1648	20.1412	13.8662
Nucb1	1075.14	0.615187	0.209338	2.93872	0.00329566	0.0337101	81.4587	52.3295	101.873	50.473	63.6762	49.1023	78.8268	57.4131
1110008P14Rik	555.074	0.615182	0.255074	2.41177	0.0158751	0.100619	42.0741	26.9981	37.6549	26.4996	53.9081	27.6788	34.6592	26.8157
Il12rb2	70.5007	0.615176	0.682203	0.901749	0.36719	0.631579	5.74685	3.0261	1.76618	2.6809	5.25039	3.47518	10.224	2.92223
Slc27a4	742.756	0.615082	0.241408	2.54789	0.0108376	0.0773238	56.6967	35.7302	75.6631	36.7076	38.7064	33.5253	55.7206	36.9576
Sart3	1400.85	0.614644	0.174691	3.51846	0.000434053	0.00690229	105.478	68.8406	99.6124	70.1673	108.549	69.5446	108.272	66.8101
Esf1	862.816	0.61428	0.211914	2.89872	0.00374694	0.0371071	65.223	42.1438	50.5833	39.1823	75.1538	46.8536	69.9319	40.3955
Lonp1	1786.61	0.613493	0.175581	3.49406	0.000475726	0.00741351	134.938	87.3838	111.057	86.7682	157.268	85.0807	136.49	90.3025
Ptprk	553.078	0.613483	0.258814	2.37036	0.0177709	0.108958	42.1508	26.673	27.9763	24.1796	42.8578	25.4711	55.6184	30.3682
Naa25	438.119	0.613204	0.269483	2.27548	0.022877	0.128342	32.9308	21.5878	32.2857	19.1787	32.0518	23.7539	34.4548	21.8307
Pdrg1	497.232	0.613165	0.268889	2.28037	0.0225859	0.127306	37.6357	24.2386	28.9653	25.1076	37.7296	21.9959	46.2123	25.6124
Bcl7c	116.896	0.612681	0.513278	1.19366	0.232609	0.495317	8.92796	5.61831	11.5155	5.51646	5.55565	6.29621	9.71277	5.04227
Fpgt	238.692	0.612362	0.378822	1.61649	0.105988	0.322207	18.2547	11.4476	18.5095	9.38313	25.5193	13.6145	10.7352	11.3451
Rnf40	1321.32	0.612306	0.210964	2.90242	0.00370293	0.0368825	100.663	63.7597	75.4511	64.6508	137.487	63.6572	89.0508	62.9711
Cand2	272.144	0.611405	0.339748	1.79958	0.0719269	0.26137	20.6355	13.2296	20.4877	15.6214	27.4119	13.6963	14.0068	10.371
Senp8	323.033	0.611214	0.321452	1.90142	0.0572474	0.227289	24.3891	15.8085	24.0907	15.6729	29.5487	14.6775	19.5278	17.075
Tdg	24.5773	0.610598	1.326	0.460481	0.645171	0.833035	2.23631	0.822034	0	0.928002	3.84622	0.735921	2.86271	0.80218
Rcor2	125.08	0.610467	0.520203	1.17352	0.240588	0.503019	9.78281	5.78181	6.07565	5.82579	16.4227	5.2741	6.85006	6.24554
Atad5	202.663	0.609979	0.39102	1.55997	0.118767	0.345247	15.5379	9.68107	9.04283	7.52713	15.3849	11.2024	22.186	10.3137
Farp2	189.139	0.609953	0.414314	1.4722	0.140967	0.378833	14.2459	9.29019	10.8797	11.0329	17.0332	7.72717	14.8248	9.11047
Ndufb2	595.623	0.609886	0.2372	2.57119	0.0101351	0.0739192	44.8239	29.294	34.4051	23.2001	52.3208	30.9905	47.7459	33.6915
Qtrt1	127.556	0.609336	0.490946	1.24115	0.214552	0.476075	9.60514	6.2677	8.40701	7.42402	8.24189	6.62329	12.1665	4.75578
Rif1	1303.91	0.609295	0.219418	2.77687	0.00548848	0.0482466	100.106	62.1499	60.4033	56.1957	141.15	64.1887	98.7635	66.0652
Upf1	1779.04	0.608829	0.172283	3.53389	0.000409485	0.00663919	133.605	87.7752	130.838	96.0998	127.352	89.4144	142.624	77.8114
Glt8d1	139.694	0.60824	0.482841	1.25971	0.207773	0.468241	10.7257	6.65757	8.90154	7.57869	7.32613	6.66418	15.9494	5.72985
Ddx39	167.269	0.60817	0.43426	1.40047	0.161371	0.409729	12.6721	8.14254	17.026	7.16624	10.5618	9.52609	10.4284	7.7353
Thsd4	232.632	0.608092	0.355323	1.71138	0.087011	0.288271	17.4839	11.4643	17.8031	13.3014	15.0186	10.262	19.63	10.8294
Cwf19l1	206.757	0.607794	0.390177	1.55774	0.119295	0.345909	15.7564	9.97202	12.0807	9.69247	13.3091	10.4256	21.8793	9.79805
Prkcc	1479.83	0.607702	0.183329	3.31482	0.00091703	0.0125675	111.597	72.5492	133.382	73.1575	107.145	70.4031	94.265	74.087
Ncdn	16304.7	0.607678	0.152887	3.97468	7.04734e-05	0.00152804	1236.5	792.413	927.809	821.643	1594.29	794.672	1187.41	760.925
Lyst	1110.45	0.607625	0.228558	2.65852	0.00784844	0.0625304	84.0709	54.1104	59.6262	59.753	92.1871	49.0614	100.399	53.5168
Hist1h2ba	4.7262	0.60762	2.51469	0.241628	0.809069	0.916842	0.353553	0.234565	0	0	0.549459	0.245307	0.511198	0.458388
Cacna1a	2330.39	0.607523	0.161984	3.75051	0.000176476	0.00326002	175.518	114.471	149.277	116.722	181.077	114.845	196.198	111.847
4632428C04Rik	54.9482	0.607056	0.713327	0.85102	0.394758	0.65539	4.20481	2.63283	2.5433	2.99023	6.28826	2.9028	3.78287	2.00545
Chac2	213.606	0.606661	0.373067	1.62614	0.103919	0.318787	16.0095	10.5712	12.3632	7.78491	16.2396	13.3284	19.4255	10.6002
Cst3	1992.38	0.606418	0.163248	3.71469	0.00020345	0.00366163	149.756	98.1712	157.826	90.5318	128.574	94.1979	162.868	109.784
Col1a2	207.848	0.606402	0.400229	1.51514	0.129738	0.361643	15.9342	9.92992	12.7871	8.24891	10.9892	10.9979	24.0263	10.5429
Fbxo16	148.197	0.606332	0.43737	1.38631	0.165651	0.41637	11.2174	7.22391	10.7384	7.52713	14.5302	7.72717	8.38365	6.41744
Ttc9b	492.043	0.606188	0.261879	2.31476	0.0206258	0.119815	37.0388	24.1899	32.0031	24.6436	42.6136	23.3451	36.4996	24.5811
Paqr9	288.314	0.605952	0.364726	1.66139	0.096635	0.305713	22.4679	13.4092	27.1285	13.8169	10.0124	11.5703	30.2629	14.8403
Khnyn	601.677	0.605716	0.291264	2.07961	0.0375611	0.176662	46.2871	28.5842	45.2848	28.9743	66.7899	27.5562	26.7868	29.2223
9330175M20Rik	15.5713	0.605499	1.32038	0.45858	0.646536	0.833954	1.3775	0.560156	0.49453	0.412445	0.366306	0.695037	3.27167	0.572985
0610011L14Rik	519.314	0.605485	0.260895	2.3208	0.0202978	0.118528	38.9769	25.6454	34.6877	28.5103	42.3694	22.8136	39.8735	25.6124
9230105E05Rik	8.44974	0.605374	1.65655	0.365443	0.714781	0.869117	0.641921	0.409546	0.211941	0.206223	0.793664	0.735921	0.920157	0.286493
Dlk1	4254.69	0.605313	0.147881	4.09323	4.25404e-05	0.000986664	320.791	208.653	382.201	205.862	259.65	194.569	320.521	225.527
Hivep3	1116.65	0.60528	0.203805	2.9699	0.00297893	0.0312506	84.25	54.7039	71.2829	57.1753	78.5117	53.4769	102.955	53.4595
Rhpn2	150.878	0.605226	0.456981	1.3244	0.185369	0.441861	11.6792	7.09568	5.79306	6.28979	11.966	6.45975	17.2785	8.53748
Dclk2	1466.86	0.605209	0.181835	3.32834	0.000873642	0.0120789	110.322	72.2112	114.59	77.5398	94.8123	72.2838	121.563	66.8101
2310046O06Rik	541.758	0.605034	0.264513	2.28735	0.0221755	0.125828	40.8799	26.5353	33.2041	26.0872	39.1337	29.396	50.3019	24.1227
Rasa4	145.105	0.604885	0.436442	1.38595	0.165763	0.41646	10.9599	7.09668	13.7762	8.40358	7.44823	5.43764	11.6553	7.44881
Hmox1	86.3926	0.604386	0.644024	0.938452	0.348012	0.614403	6.84473	3.90578	11.9394	3.29956	2.8694	4.86526	5.72542	3.55251
Sec24b	1415.32	0.603882	0.186546	3.23718	0.00120718	0.0155418	106.439	69.6803	123.632	65.7335	98.6585	74.2054	97.0255	69.102
Tnfsf12	68.0622	0.603742	0.622582	0.969739	0.332177	0.598325	5.11816	3.35135	4.38012	3.40268	5.55565	3.27076	5.4187	3.38061
Pex14	790.316	0.603573	0.222789	2.70917	0.00674522	0.0558561	59.804	38.5411	51.5017	36.2436	79.2443	42.1928	48.6661	37.1868
1200016B10Rik	163.654	0.603268	0.426765	1.41358	0.157485	0.403962	12.3267	8.03809	12.9991	6.75379	9.46291	8.7084	14.518	8.65208
Dvl2	235.036	0.603131	0.377233	1.59883	0.109859	0.329092	17.7079	11.5395	13.8468	13.0436	22.1005	9.7714	17.1763	11.8035
Pgpep1l	24.8158	0.602676	1.245	0.484075	0.628332	0.823296	2.3789	0.709123	5.43983	0.515557	0.0610511	0.695037	1.63583	0.916777
Vtn	148.331	0.602442	0.469052	1.28438	0.199008	0.458787	11.5298	6.92819	6.92342	5.56801	8.54715	8.05425	19.1188	7.16232
Arhgap23	3307.83	0.602124	0.153912	3.91213	9.14857e-05	0.00191174	248.745	162.873	209.327	169	267.098	162.107	269.81	157.514
Chd5	11664	0.60164	0.145315	4.14025	3.46927e-05	0.000832198	878.933	572.511	703.363	599.026	899.282	568.499	1034.15	550.009
Edc4	1101.76	0.601418	0.222605	2.70172	0.00689815	0.0568805	83.6754	53.4253	54.9635	52.9992	100.673	56.9112	95.3896	50.3654
Acy1	185.061	0.601062	0.445569	1.34898	0.177344	0.431862	14.2875	8.74103	14.7652	7.73335	20.9405	9.03548	7.15678	9.45426
2810029C07Rik	118.931	0.600423	0.511586	1.17365	0.240536	0.503019	9.0933	5.70623	13.3523	5.36179	7.99769	5.39676	5.9299	6.36014
Gfm1	715.404	0.600307	0.231213	2.59634	0.00942233	0.0706924	53.8688	35.1544	54.8928	32.7894	43.5294	36.0601	63.1841	36.6138
Tfb1m	133.922	0.600221	0.525689	1.14178	0.253545	0.517959	10.3822	6.28267	4.66271	7.32091	11.966	5.96914	14.518	5.55796
2010204K13Rik	457.912	0.600201	0.292412	2.05259	0.0401127	0.183579	34.8035	22.1781	43.236	23.8703	22.5278	22.3229	38.6466	20.341
Agl	1195.01	0.600093	0.251339	2.38759	0.0169594	0.105694	91.7249	56.9801	53.5505	59.8046	130.222	53.4361	91.4023	57.6996
Tm9sf2	922.878	0.600057	0.200887	2.98704	0.00281692	0.0299958	69.1395	45.7013	69.7287	48.2046	69.5982	42.0293	68.0916	46.8702
Itgb4	346.688	0.599465	0.307911	1.94688	0.0515494	0.21242	25.9806	17.1605	23.2429	17.4258	25.4583	19.5019	29.2405	14.5538
Psmd2	4820.45	0.599262	0.138938	4.31317	1.60931e-05	0.000418259	362.686	237.16	302.652	219.112	434.928	246.615	350.478	245.753
Rhoc	228.407	0.599077	0.358472	1.67119	0.0946833	0.30245	17.11	11.3125	18.015	11.3423	15.9343	12.5107	17.3807	10.0845
Snx17	1356	0.598629	0.176525	3.39119	0.000695905	0.0100128	101.677	67.061	96.5746	68.1566	100.185	66.56	108.272	66.4663
Kcnk12	149.589	0.598449	0.434765	1.37649	0.16867	0.420945	11.2685	7.34603	16.0369	9.33158	8.66925	5.31499	9.09933	7.39151
Bbs1	768.747	0.598106	0.251754	2.37575	0.0175133	0.107764	58.2793	37.3819	38.9972	39.4401	71.4297	37.1231	64.411	35.5824
Ahdc1	2747.54	0.597722	0.155393	3.84652	0.000119806	0.00236029	205.966	135.931	204.311	148.429	228.636	126.946	184.952	132.417
Clk3	1210.68	0.597556	0.19513	3.06235	0.00219603	0.0249182	90.8201	59.8337	96.7159	63.7744	77.9011	62.2671	97.8434	53.4595
Tuft1	132.081	0.596464	0.49362	1.20835	0.226914	0.48786	10.1492	6.28665	14.3414	6.03202	5.67775	6.58241	10.4284	6.24554
C130026I21Rik	2.8256	0.596446	3.54339	0.168327	0.866326	NA	0.305255	0.0463559	0	0	0.915766	0.081769	0	0.0572985
Phldb1	4233.57	0.596369	0.165113	3.61187	0.000303993	0.00518352	320.86	205.956	236.032	206.017	432.608	219.386	293.939	192.466
March9	375.051	0.596062	0.309837	1.92379	0.0543808	0.219705	28.2064	18.4641	29.3892	20.9316	34.0665	15.7814	21.1636	18.6793
Ppp1r35	190.532	0.596042	0.396422	1.50355	0.132696	0.366864	14.4173	9.29214	15.613	8.76447	9.95132	8.91282	17.6875	10.1991
Pwp1	454.408	0.595308	0.265316	2.24377	0.0248474	0.135443	34.081	22.4645	35.2529	21.6534	37.8517	23.7948	29.1383	21.9453
Phip	2077.36	0.595128	0.207333	2.8704	0.00409954	0.0393718	158.783	99.7181	95.0204	98.2136	218.258	106.054	163.072	94.8864
Plch2	596.73	0.594662	0.285186	2.08517	0.0370538	0.175176	45.6616	28.5941	58.6371	27.5823	52.9923	30.0092	25.3554	28.1909
Cybasc3	80.6441	0.59449	0.640084	0.928769	0.353009	0.618252	6.61438	3.42079	12.7165	3.81512	2.01468	2.78015	5.11198	3.66711
Hivep1	2503.68	0.5942	0.155524	3.82062	0.000133114	0.00255842	187.562	123.991	206.855	133.787	192.555	113.618	163.277	124.567
Scin	15.9418	0.594173	1.37861	0.430995	0.666472	0.843685	1.32751	0.656253	2.04877	0.618668	1.83153	0.490614	0.10224	0.859478
Prex2	892.216	0.593528	0.242447	2.44807	0.0143622	0.0938277	68.0398	42.9855	42.1057	40.729	92.7976	42.847	69.2163	45.3804
BC039966	68.6141	0.593413	0.667033	0.88963	0.373664	0.637592	5.17783	3.36035	4.87465	3.09334	7.38718	2.57572	3.27167	4.41199
Zfp951	45.7084	0.593168	0.781497	0.759015	0.447844	0.700918	3.47829	2.20957	2.26071	1.90756	5.31144	1.79892	2.86271	2.92223
Msh6	675.028	0.593059	0.223793	2.65003	0.00804838	0.0636358	50.5793	33.4197	48.1813	33.0472	45.1778	30.5407	58.3789	36.6711
6330439K17Rik	9406.9	0.592873	0.150056	3.951	7.7825e-05	0.00166197	709.547	461.026	540.309	450.494	891.467	450.874	696.866	481.709
Apba2	2731.26	0.592826	0.152498	3.88743	0.000101312	0.00206713	205.067	134.805	167.434	128.528	217.83	137.168	229.937	138.72
Man2c1	447.297	0.592743	0.266381	2.22517	0.0260699	0.140144	33.4313	22.2294	34.0519	25.2107	36.0812	21.9959	30.1607	19.4815
Zfp808	44.2429	0.592659	0.827316	0.716364	0.473767	0.720907	3.62531	1.88018	1.90747	1.95912	1.70943	1.96246	7.25902	1.71896
Pds5b	3220.77	0.592536	0.171771	3.44956	0.000561493	0.00843757	243.36	157.425	171.955	150.13	302.935	152.54	255.19	169.604
Maged1	12614.2	0.592275	0.120539	4.91355	8.94436e-07	3.27637e-05	943.409	626.278	909.723	668.832	956.487	611.632	964.018	598.369
Eif3h	3095.78	0.592215	0.145947	4.05774	4.9549e-05	0.00111956	231.664	153.568	248.819	146.418	226.255	161.126	219.918	153.159
Ppp1r14b	507.525	0.5922	0.25022	2.36672	0.0179465	0.109608	37.9371	25.2182	40.834	27.5307	34.4328	21.9959	38.5444	26.1281
Wbscr17	909.062	0.592045	0.210166	2.81703	0.00484694	0.0440892	68.1946	44.927	70.4352	43.1521	57.5711	46.363	76.5775	45.2658
Pmvk	1140.33	0.591742	0.197184	3.00096	0.00269128	0.0290352	85.3231	56.5774	94.3845	51.0401	84.1894	60.0185	77.3954	58.6737
Cep72	27.0581	0.591601	1.0558	0.560333	0.575252	0.789966	2.23026	1.13678	0.49453	1.34045	4.15147	0.981228	2.04479	1.08867
Ttc4	742.188	0.59146	0.224258	2.63741	0.00835417	0.0652245	55.7716	36.5846	62.8759	36.3468	61.6005	39.3718	42.8384	34.0353
Aprt	347.836	0.591453	0.302913	1.95255	0.0508726	0.210817	26.2113	17.0727	33.628	17.8898	25.5804	18.6025	19.4255	14.7257
Ctbs	60.7939	0.591183	0.720875	0.820092	0.412164	0.670828	4.7959	2.76915	8.40701	2.47467	2.19784	3.31165	3.78287	2.52114
Glb1l	62.715	0.59106	0.749858	0.788229	0.430563	0.686677	5.00565	2.79847	5.93436	3.6089	7.75348	1.92157	1.32912	2.86493
Ift88	556.002	0.59097	0.256708	2.30211	0.0213292	0.122535	42.1504	27.0373	29.8131	23.4578	38.1569	27.8015	58.4811	29.8525
Slc30a5	455.453	0.590544	0.269154	2.19407	0.0282302	0.147281	34.1638	22.5117	34.3345	21.8596	28.9992	23.0997	39.1578	22.5756
Sema4a	499.438	0.590189	0.296212	1.99245	0.0463215	0.20021	38.1315	24.0174	26.2101	26.2934	31.4413	21.4644	56.743	24.2946
1810027O10Rik	142.801	0.589894	0.442385	1.33344	0.182387	0.43861	10.6774	7.09242	10.4558	6.44446	11.966	7.15479	9.61053	7.678
Zfp825	192.524	0.589786	0.388597	1.51773	0.129082	0.360703	14.393	9.56428	15.2598	8.40358	15.4459	10.262	12.4732	10.0272
Pgr15l	122.959	0.589307	0.469636	1.25482	0.209546	0.470267	9.19814	6.10265	8.33636	5.77424	9.34081	6.17356	9.91725	6.36014
Pde9a	396.186	0.58889	0.278409	2.1152	0.034413	0.167576	29.6314	19.6692	30.7315	21.1378	32.296	19.9925	25.8666	17.8771
Sema4c	202.655	0.58881	0.397779	1.48024	0.138809	0.375855	15.0967	10.1213	16.7434	12.1671	16.789	7.48187	11.7576	10.7148
Prep	389.379	0.588665	0.33496	1.75742	0.0788465	0.273869	29.9306	18.5228	15.2598	18.4569	34.2496	17.1715	40.2824	19.9399
Rwdd2b	181.538	0.588495	0.407051	1.44575	0.148247	0.390707	13.7115	8.8787	15.7543	9.02225	16.1785	9.07636	9.20157	8.53748
Notch2	289.887	0.588395	0.337992	1.74085	0.0817091	0.278713	21.9061	14.1669	15.4011	14.3325	22.4057	13.9007	27.9114	14.2673
Pak1ip1	1210.75	0.587704	0.183076	3.21016	0.00132663	0.0167238	90.4372	60.2253	87.5318	58.0517	90.844	64.9246	92.9359	57.6996
Tmem209	249.486	0.587212	0.423423	1.38682	0.165497	0.416295	19.3259	11.7195	9.53736	13.0436	30.0371	9.85317	18.4031	12.2619
Nek2	33.9572	0.587181	0.94903	0.618718	0.536102	0.76352	2.66033	1.56523	0.635824	1.34045	3.35781	0.776806	3.98735	2.57843
Dip2b	2327.7	0.586439	0.178648	3.28265	0.00102836	0.0137539	175.064	114.589	130.061	116.825	201.285	110.225	193.846	116.717
Usp5	4178.21	0.586343	0.14651	4.00206	6.27925e-05	0.00137878	312.885	207.042	268.459	213.853	359.591	207.244	310.604	200.029
Plbd2	690.747	0.585816	0.236051	2.48173	0.0130745	0.0880764	51.9965	33.9585	52.9147	34.9032	39.0727	32.4214	64.002	34.551
Trip12	6133.2	0.585641	0.161304	3.63066	0.000282696	0.00487917	462.497	300.704	367.365	299.126	610.144	293.633	409.981	309.355
Plxnb2	745.255	0.585365	0.265145	2.20772	0.0272641	0.144338	56.213	36.5249	41.7524	43.4614	49.6956	32.1352	77.191	33.978
Plrg1	701.928	0.585239	0.224091	2.61161	0.00901162	0.0687373	52.321	35.0254	52.9147	31.9645	53.5418	40.1077	50.5064	33.004
Sec31a	2721.35	0.585183	0.16005	3.65625	0.000255932	0.00447481	204.101	134.537	165.032	134.148	239.931	136.759	207.342	132.703
Gigyf1	1408.71	0.585061	0.172937	3.38309	0.00071675	0.0102464	105.166	70.1307	107.596	71.3015	104.947	67.5821	102.955	71.5086
Sema3e	140.528	0.584829	0.482886	1.21111	0.225852	0.486742	10.8244	6.66253	17.2379	6.34135	8.18084	6.82771	7.05454	6.81853
Inpp5k	450.858	0.584655	0.289109	2.02226	0.043149	0.19138	33.8145	22.2893	26.3514	25.0045	41.1484	20.892	33.9436	20.9713
Ankrd32	376.745	0.584637	0.328312	1.78073	0.0749558	0.267028	28.8707	18.0106	17.2379	17.8383	26.7404	18.3163	42.6339	17.8771
Thoc2	1274.3	0.584466	0.231998	2.51927	0.0117599	0.0818774	97.3722	61.1989	55.458	57.7424	133.397	60.3047	103.262	65.5495
Cd59a	97.5777	0.584209	0.540388	1.08109	0.279656	0.547289	7.35125	4.79111	8.61895	4.58846	8.42505	4.7426	5.00974	5.04227
Pcdhb12	40.2122	0.584098	0.830775	0.703077	0.482008	0.726853	2.89666	2.10726	1.97812	1.80445	3.23571	1.02211	3.47615	3.49521
Nipbl	1497.82	0.584039	0.201644	2.89638	0.00377498	0.0372735	113.345	73.0402	74.7446	69.6517	145.057	76.4132	120.234	73.0556
Vps39	2104.23	0.58393	0.167948	3.47684	0.000507357	0.00776651	157.706	104.14	128.366	103.472	183.519	104.378	161.232	104.57
Serpinc1	6.90131	0.583879	2.81197	0.20764	0.83551	0.928689	0.749758	0.109025	0	0	0	0.327076	2.24927	0
Nat10	642.385	0.583451	0.24585	2.3732	0.0176349	0.108359	48.4131	31.5239	36.4539	30.3663	63.4931	32.7485	45.2922	31.4569
Sstr1	305.36	0.582951	0.368045	1.58391	0.113214	0.334951	23.3202	14.6781	22.6071	17.6836	13.6144	14.146	33.7391	12.2046
Hsp90aa1	35413.1	0.582882	0.128381	4.54027	5.61827e-06	0.000168852	2654.76	1751.98	2123.16	1726.96	3075.32	1774.71	2765.79	1754.25
Tbc1d17	785.301	0.582869	0.2128	2.73905	0.00616168	0.0526457	58.6482	39.0729	53.2679	38.8214	66.2404	42.3564	56.4363	36.0408
Cul2	1142.79	0.582145	0.267208	2.17862	0.0293596	0.150948	88.6842	53.5224	38.5733	50.3699	107.45	50.7786	120.029	59.4186
Gadd45g	397.223	0.582065	0.322375	1.80555	0.070988	0.258755	30.6011	18.8285	27.2698	21.0347	17.0943	16.3129	47.4392	19.1377
Vstm2l	1628.35	0.582056	0.181916	3.19958	0.00137627	0.0171819	122.274	80.3545	131.686	79.6535	92.6144	77.9259	142.522	83.484
Spata2l	178.442	0.581938	0.402183	1.44695	0.147912	0.390286	13.3151	8.88988	13.3523	8.50669	14.8354	8.42221	11.7576	9.74075
D630037F22Rik	365.229	0.581671	0.289045	2.01239	0.0441789	0.194646	27.2513	18.197	25.5743	18.9209	27.9614	17.9074	28.2181	17.7625
Wnt5b	25.4992	0.581199	1.01275	0.573883	0.566047	0.785014	1.83231	1.34075	1.90747	0.618668	1.95363	1.51273	1.63583	1.89085
1600029O15Rik	1623.15	0.580986	0.186104	3.12183	0.00179731	0.0213104	121.194	80.7864	134.018	71.25	102.993	86.021	126.573	85.0883
Dpysl3	1294.21	0.580982	0.204193	2.84526	0.00443745	0.0415907	96.9023	64.146	84.7765	64.2899	119.538	58.5875	86.3925	69.5604
Thap6	107.13	0.580716	0.552364	1.05133	0.293108	0.560702	8.21506	5.11601	6.1463	5.82579	5.6167	5.39676	12.8822	4.12549
Hspa5	2161.46	0.580711	0.163534	3.55102	0.000383745	0.00631517	162.149	106.819	157.402	104.916	128.757	100.371	200.288	115.17
Wdr1	4829.11	0.57992	0.13656	4.24662	2.17017e-05	0.000549354	360.845	240.078	317.064	238.909	412.949	247.147	352.522	234.179
Clip2	3822.09	0.579903	0.14305	4.05383	5.03851e-05	0.0011368	285.363	190.25	301.734	185.291	304.584	192.075	249.772	193.383
Micu1	1204.04	0.579265	0.185238	3.12714	0.00176514	0.0210412	89.9097	59.9186	77.4999	57.9486	98.4753	63.5345	93.7538	58.2726
Irgm1	121.944	0.578794	0.504125	1.14812	0.250921	0.514872	9.30822	5.86627	5.22789	5.82579	12.8818	5.64206	9.81501	6.13094
D10Wsu52e	3163.77	0.578436	0.142848	4.04932	5.13664e-05	0.0011556	235.921	157.772	218.017	160.029	239.564	153.194	250.18	160.092
Mtap1s	1147.81	0.578426	0.199793	2.89512	0.00379011	0.0372974	86.0127	56.8184	73.8262	56.5566	107.328	57.1157	76.8842	56.7829
Tmc1	9.23707	0.578403	1.89563	0.305124	0.760272	0.892334	0.699996	0.449444	0	0.824891	1.28207	0.408845	0.817917	0.114597
Polrmt	448.015	0.578387	0.28436	2.034	0.0419515	0.188431	33.5428	22.2072	30.5902	23.7672	41.82	20.2787	28.2181	22.5756
Fuca2	647.949	0.578241	0.234009	2.47103	0.0134726	0.089748	48.7416	31.8877	43.7306	30.3147	36.4475	27.7606	66.0468	37.5878
Ostc	464.123	0.577979	0.275479	2.09809	0.0358975	0.1718	34.7468	23.0076	42.6709	21.6534	29.6708	23.3042	31.8988	24.0654
Tubb4a	22452.9	0.577837	0.122177	4.72949	2.2508e-06	7.51941e-05	1678.74	1115.25	1524.28	1085.71	2002.47	1155.72	1509.47	1104.31
Tufm	1135.88	0.57774	0.200297	2.88442	0.00392136	0.0382059	85.1447	56.2013	66.1963	53.0508	103.97	56.1344	85.2679	59.4186
Aco2	4578.09	0.577606	0.163884	3.52447	0.000424324	0.00678221	344.672	225.015	247.689	225.092	443.109	237.089	343.219	212.864
Ebpl	180.483	0.577338	0.429645	1.34375	0.179028	0.434061	13.6639	8.79504	14.1294	9.22847	18.3764	7.9316	8.48589	9.22506
Ddx24	5769.39	0.577143	0.12944	4.45877	8.24311e-06	0.000232902	429.859	288.072	406.857	266.13	468.445	293.714	414.275	304.37
Syt5	1536.03	0.576935	0.18509	3.11705	0.00182671	0.0215278	114.968	76.1721	136.208	73.57	92.5534	74.9004	116.144	80.0461
Hs2st1	844.823	0.576795	0.210839	2.73572	0.00622448	0.0530393	63.287	41.8409	56.7296	41.5539	52.2597	37.0414	80.8716	46.9275
Lims2	153.269	0.576707	0.451748	1.27661	0.201739	0.462068	11.7831	7.28931	8.26571	7.01157	19.109	8.09513	7.97469	6.76123
Cul4b	1166.5	0.576548	0.186891	3.08495	0.00203589	0.0234916	87.0214	58.1352	78.5596	58.5157	100.917	62.7168	81.5873	53.173
Txnrd1	2113.45	0.576087	0.167077	3.44803	0.000564695	0.0084775	157.68	105.313	159.38	104.091	177.17	101.721	136.49	110.128
Tie1	5.55402	0.576026	2.25052	0.255953	0.797987	0.91145	0.538705	0.152424	0.211941	0.154667	1.40417	0.245307	0	0.0572985
Atp5a1	16231	0.576026	0.126167	4.56558	4.98125e-06	0.000152055	1212.89	806.866	1118.84	790.297	1441.29	821.82	1078.53	808.482
Gadd45a	193.518	0.575874	0.396707	1.45163	0.146604	0.388247	14.3613	9.71956	13.8468	10.3111	13.4923	11.2841	15.7449	7.56341
Gpr135	170.047	0.575762	0.409342	1.40656	0.159559	0.406874	12.7255	8.43477	12.7871	9.38313	9.95132	7.44098	15.4382	8.48018
Lcp1	133.682	0.575712	0.453835	1.26855	0.204602	0.465258	9.93345	6.70164	9.8906	5.87735	9.89027	6.66418	10.0195	7.56341
Top3b	411.46	0.57533	0.285584	2.01458	0.043949	0.193933	30.8093	20.3918	23.8787	20.6223	36.7527	21.3008	31.7965	19.2523
Klb	12.6781	0.575219	1.62884	0.353146	0.723979	0.873578	1.17001	0.407631	0	0.257778	1.46523	0.735921	2.04479	0.229194
Itga8	29.491	0.575194	1.19877	0.479821	0.631355	0.82499	2.47807	1.19172	0.0706471	1.70134	3.78517	0.613268	3.57839	1.26057
Ppp2r1a	7209.6	0.574824	0.16409	3.5031	0.00045988	0.00722245	541.169	355.977	394.423	378.006	669.73	363.668	559.353	326.258
Scaf4	924.72	0.573469	0.202869	2.82679	0.00470173	0.0433145	68.8551	46.215	64.9953	47.7921	74.9096	44.7277	66.6603	46.1253
Phrf1	1549.27	0.573148	0.183627	3.12127	0.00180074	0.0213348	115.809	76.978	92.7597	77.282	134.434	76.127	120.234	77.5249
Tecpr1	1746.76	0.572953	0.179832	3.18604	0.00144232	0.0178633	130.078	87.2851	118.263	98.2651	150.613	82.9138	121.358	80.6763
Supt16h	3230.03	0.57245	0.172834	3.31213	0.000925883	0.0126531	242.736	159.201	183.753	163.122	317.893	160.921	226.563	153.56
Celsr2	2647.52	0.572438	0.190074	3.01166	0.0025982	0.0282464	198.439	131.013	151.891	146.882	189.564	122.449	253.861	123.708
Slc46a1	136.717	0.572274	0.463592	1.23443	0.217041	0.478719	10.4651	6.54766	16.7434	8.19735	6.16616	5.60118	8.48589	5.84445
Lrp1b	2074.73	0.571961	0.175931	3.25105	0.00114978	0.0149414	156.05	102.125	108.726	93.522	159.954	102.497	199.47	110.357
Sep15	1103.31	0.571858	0.195759	2.92124	0.00348643	0.0352447	81.8926	55.4012	79.9019	46.5032	88.5851	58.7919	77.191	60.9083
Pappa	103.152	0.571836	0.531145	1.07661	0.281655	0.549098	7.67561	5.16036	5.72242	4.17601	7.38718	6.95037	9.91725	4.35469
Bag3	371.871	0.571468	0.291159	1.96274	0.0496767	0.20814	27.7404	18.5344	34.4051	20.6223	24.1762	19.3384	24.6398	15.6425
Sec24d	569.84	0.5714	0.26108	2.1886	0.0286257	0.148499	42.835	28.0746	38.2201	30.9334	58.1817	28.5374	32.1033	24.753
Ybx2	16.5169	0.571364	1.60423	0.35616	0.721721	0.872409	1.54354	0.511785	0.847765	0.464001	0	0.899459	3.78287	0.171896
Adck4	323.084	0.571029	0.310767	1.83748	0.066139	0.248452	24.0988	16.105	21.5474	17.5805	30.4034	17.4986	20.3457	13.236
Raph1	1872.31	0.570519	0.19493	2.92678	0.00342486	0.0346673	140.572	92.414	98.4114	89.2944	174.545	85.326	148.759	102.622
Pkdcc	130.412	0.570285	0.4746	1.20161	0.229514	0.491076	9.70815	6.52008	8.40701	7.83646	12.0271	5.76472	8.69037	5.95905
Spata13	375.743	0.570107	0.308631	1.84721	0.0647162	0.245373	28.2162	18.5404	34.1932	20.9832	19.17	18.4798	31.2853	16.1582
Bcas3	834.946	0.569409	0.228288	2.49425	0.0126222	0.0859217	62.5588	41.3399	45.85	41.5539	68.3161	41.784	73.5103	40.682
Actr8	859.772	0.568904	0.21674	2.62482	0.00866957	0.0667497	64.0867	42.9014	58.1426	40.5743	76.8633	42.2337	57.2542	45.8961
Ap2a1	4977.74	0.568822	0.134744	4.22152	2.42666e-05	0.000603485	369.787	249.632	354.225	269.688	397.503	253.852	357.634	225.355
Copb1	648.836	0.568763	0.267558	2.12576	0.0335233	0.164634	49.0653	31.6744	42.247	30.3663	70.3919	31.4811	34.557	33.1759
Twf2	436.425	0.568548	0.274119	2.07409	0.0380708	0.17773	32.5704	21.7373	40.1276	22.5814	29.3656	22.9771	28.2181	19.6534
Dapk3	893.248	0.568415	0.201268	2.82417	0.00474033	0.0435126	66.4081	44.7457	61.6749	43.049	69.0487	45.1774	68.5006	46.0107
Mfap2	31.2293	0.568318	1.03227	0.55055	0.581942	0.794621	2.57353	1.31258	3.67365	1.08267	0.366306	1.5945	3.68063	1.26057
Zcchc18	7026.05	0.567913	0.122295	4.6438	3.4205e-06	0.00010848	522.175	352.13	511.203	348.516	544.636	357.208	510.687	350.667
Lyrm2	334.53	0.567546	0.300736	1.88719	0.0591349	0.231533	24.8024	16.8257	23.8787	14.3325	25.2751	17.8665	25.2532	18.2782
Myt1l	7561.87	0.567434	0.13861	4.09374	4.24478e-05	0.000986664	563.653	377.33	663.164	366.922	490.423	380.88	537.372	384.187
Peo1	309.238	0.567241	0.31456	1.80329	0.0713431	0.259622	23.1119	15.369	17.9444	13.9716	28.694	16.4356	22.6972	15.6998
Gas5	664.232	0.566686	0.233919	2.42258	0.0154107	0.0986085	49.1929	33.4627	49.7356	27.6338	51.2218	37.5729	46.6213	35.1813
Zic5	68.1013	0.5663	0.714404	0.792689	0.427959	0.684328	5.75833	2.71605	2.61394	2.21689	12.8207	3.06634	1.84031	2.86493
Plxnc1	989.85	0.565974	0.210914	2.68343	0.0072871	0.0592096	73.3648	49.8099	74.1088	44.6472	79.4274	46.8536	66.558	57.9288
Il22ra1	4.85515	0.565471	2.13436	0.264937	0.791058	0.907628	0.3396	0.264564	0.141294	0.515557	0.366306	0.163538	0.511198	0.114597
Zswim1	592.748	0.56545	0.264647	2.13662	0.0326291	0.162032	44.4089	29.3513	50.8659	31.913	51.8934	26.5749	30.4674	29.566
Scml4	239.418	0.565138	0.357322	1.58159	0.113743	0.336069	17.8583	11.9343	17.8737	11.6516	21.49	11.7747	14.2113	12.3765
Orc6	267.453	0.56437	0.369363	1.52796	0.126523	0.357155	19.8475	13.4337	24.02	10.5689	20.3911	13.2875	15.1315	16.4447
Prps1l3	441.781	0.564246	0.304801	1.8512	0.0641415	0.243737	33.2376	21.7367	21.1235	22.8907	40.9653	23.1815	37.6242	19.1377
Polr3b	467.335	0.5642	0.264661	2.13178	0.0330247	0.163009	34.8378	23.3163	27.4817	20.8285	41.7589	24.081	35.2727	25.0395
Atxn10	4821.65	0.563226	0.146751	3.83797	0.000124054	0.00243234	359.498	240.498	306.891	233.032	439.323	240.646	332.279	247.816
Pelo	452.981	0.563171	0.265321	2.1226	0.0337874	0.16541	33.6796	22.6884	30.6608	23.0454	39.1948	23.8766	31.1831	21.1432
Kremen2	29.6559	0.56311	0.951643	0.591723	0.554036	0.776069	2.29691	1.3934	1.69553	1.18578	3.96832	1.39007	1.22688	1.60436
Elp3	1821.4	0.562906	0.160693	3.50299	0.000460072	0.00722245	135.233	91.4181	125.328	89.5522	134.679	89.1282	145.692	95.574
Pgm3	319.679	0.562783	0.367808	1.5301	0.125992	0.356222	24.7421	15.038	14.2001	15.1058	18.9258	15.4543	41.1003	14.5538
Eef1g	8527.42	0.562752	0.12319	4.56817	4.92003e-06	0.000150481	632.96	428.173	665.99	413.837	643.478	445.069	589.412	425.614
Ddx56	510.526	0.562587	0.255707	2.20013	0.027798	0.145759	37.9599	25.5688	42.8122	28.201	31.8076	25.1849	39.26	23.3205
Polr1d	1142.67	0.562119	0.189077	2.97296	0.00294939	0.0310035	84.8898	57.3015	83.6462	57.2784	77.4738	58.0151	93.5493	56.611
Fam71e1	59.7824	0.562109	0.790289	0.71127	0.476917	0.723156	5.08768	2.35151	10.0319	2.78401	0.732613	2.20776	4.49855	2.06275
Snx7	476.083	0.561364	0.27211	2.06301	0.0391121	0.180681	35.5019	23.7407	32.7803	21.9627	44.6894	24.1627	29.0361	25.0968
Celf3	1628.76	0.561314	0.176012	3.18907	0.00142733	0.0177388	121.08	81.5998	121.089	88.2118	139.502	78.948	102.649	77.6395
Zfp804a	642.035	0.561279	0.231907	2.42028	0.0155086	0.0990312	47.7354	32.1579	46.6271	30.9334	41.881	32.1352	54.6982	33.405
Sesn1	686.748	0.560708	0.252766	2.21829	0.0265353	0.141643	51.5474	33.9099	34.9703	32.6863	65.9962	32.2579	53.6758	36.7857
Nr2f6	488.003	0.560596	0.27427	2.04395	0.040958	0.185683	36.4265	24.2995	36.03	27.4276	45.8493	22.8953	27.4002	22.5756
Grid2ip	224.178	0.560303	0.367651	1.52401	0.127507	0.358686	16.7752	11.121	18.015	10.6205	20.7574	12.4289	11.5531	10.3137
Daam1	2749.65	0.55979	0.188773	2.96542	0.00302268	0.0314974	207.466	134.694	126.953	127.755	261.726	139.498	233.72	136.829
Fntb	402.064	0.559731	0.3006	1.86205	0.0625961	0.240024	30.0312	20.0008	36.5246	19.5396	22.2836	21.6688	31.2853	18.7939
1700013F07Rik	24.074	0.559599	1.37313	0.407535	0.683615	0.852629	2.03378	0.96193	0	1.49511	2.6252	0.81769	3.47615	0.572985
2410091C18Rik	521.868	0.558616	0.262216	2.13037	0.0331415	0.163345	38.789	26.1511	45.9206	24.0249	37.7296	28.4147	32.7167	26.0135
Pddc1	282.461	0.558536	0.324164	1.723	0.0848879	0.285292	20.9853	14.1635	23.4548	15.1574	22.2226	13.9825	17.2785	13.3506
Fat1	1995.05	0.558381	0.217901	2.56254	0.0103908	0.0749952	151.777	96.4823	86.0482	95.6358	150.491	90.5592	218.793	103.252
Mpzl3	13.8752	0.557608	1.4517	0.384108	0.700898	0.861717	1.14286	0.583741	0.353236	1.03111	2.56414	0.204423	0.511198	0.515687
Fzd8	80.5166	0.557502	0.577681	0.96507	0.33451	0.600435	5.96149	4.05782	5.29853	4.27912	6.34931	4.45641	6.23662	3.43791
St8sia2	227.432	0.556729	0.393862	1.41351	0.157506	0.403962	16.9641	11.337	13.5642	12.8889	14.8354	12.1836	22.4927	8.93857
Zfp292	1821.36	0.556371	0.198626	2.8011	0.00509285	0.0455926	136.998	89.6487	96.5746	88.8304	189.686	91.704	124.732	88.4116
Zswim3	221.494	0.555735	0.363879	1.52725	0.126699	0.357456	16.4691	11.0931	13.4936	9.5378	15.568	12.2245	20.3457	11.517
Epdr1	945.791	0.555652	0.209334	2.65438	0.0079455	0.0631422	70.4046	47.2876	87.3905	48.4108	61.6616	48.5299	62.1617	44.9221
X99384	155.904	0.555247	0.455322	1.21946	0.22267	0.483324	11.8321	7.56827	6.49953	7.57869	16.728	8.42221	12.2688	6.70393
Snrpg	158.16	0.555078	0.424346	1.30808	0.190846	0.448399	11.7189	7.96217	11.5861	6.59913	9.76817	8.1769	13.8024	9.11047
Uba5	1081.74	0.554862	0.192153	2.88761	0.00388187	0.0379578	80.0141	54.5947	80.5377	48.9779	83.0294	57.8516	76.4753	56.9547
Ank1	3126.12	0.554291	0.178957	3.09734	0.00195263	0.0227364	232.154	156.853	184.883	179.053	279.186	151.068	232.391	140.439
Hyal2	78.9802	0.554168	0.594494	0.932167	0.35125	0.617137	5.97949	3.84864	5.79306	3.81512	8.66925	4.29287	3.47615	3.43791
Eef2	30981.7	0.553727	0.111952	4.9461	7.57146e-07	2.79982e-05	2292.77	1562.52	2282.11	1654.27	2403.76	1555	2192.43	1478.3
Tns3	1107.74	0.55368	0.223754	2.4745	0.0133423	0.0893102	82.9009	54.9443	63.0172	58.5673	111.357	53.1499	74.3282	53.1157
Itfg2	603.961	0.553514	0.248272	2.22947	0.0257829	0.139033	44.7626	30.3929	39.0679	33.8205	43.8957	28.8236	51.3243	28.5347
Tuba1c	327.455	0.553477	0.363799	1.52138	0.128164	0.359442	25.0097	15.738	13.3523	16.7556	24.3594	15.3317	37.3175	15.1268
Astn1	3087.81	0.552757	0.157288	3.5143	0.000440913	0.00698583	229.09	155.15	192.584	160.132	258.307	148.493	236.378	156.826
Csnk1d	2424.59	0.551973	0.159189	3.4674	0.000525518	0.00798172	179.886	121.825	159.874	125.229	212.519	123.757	167.264	116.488
Gdi1	10909	0.551819	0.125286	4.40447	1.06042e-05	0.000291672	808.275	549.212	770.548	539.633	913.141	548.139	741.135	559.864
Saal1	233.11	0.551469	0.373118	1.478	0.139408	0.376565	17.571	11.4367	10.4558	10.5689	23.1383	12.5107	19.1188	11.2305
Pcnxl3	588.36	0.551077	0.261085	2.11072	0.0347965	0.168547	43.7758	29.4384	39.845	32.4285	55.8007	27.0655	35.6816	28.8212
Sp140	161.483	0.550591	0.467057	1.17885	0.238457	0.501142	12.0444	8.0502	7.98312	10.6205	18.4374	8.25867	9.71277	5.27147
Slc26a9	5.139	0.550022	2.84396	0.1934	0.846646	0.933998	0.549459	0.0900262	0	0	1.64838	0.0408845	0	0.229194
Ncf2	35.9515	0.549814	0.94394	0.582467	0.560252	0.780192	2.98025	1.49347	0.353236	0.979558	4.39568	2.41219	4.19183	1.08867
Etfdh	367.06	0.549779	0.29387	1.87082	0.0613701	0.2366	27.2931	18.383	21.618	16.9103	33.8833	19.2157	26.3778	19.0231
5730507C01Rik	78.265	0.549278	0.586571	0.936422	0.349056	0.615614	5.83091	3.90822	4.38012	3.6089	7.38718	4.04757	5.72542	4.0682
Dusp1	330.218	0.548875	0.303072	1.81104	0.0701351	0.257016	24.4907	16.6009	34.4051	21.9112	18.9258	12.3062	20.1412	15.5852
Kcnv1	54.4834	0.548544	0.700825	0.782712	0.433796	0.688835	4.04502	2.73477	3.03783	3.04179	4.70093	2.41219	4.39631	2.75033
Sgsm3	917.67	0.548293	0.201699	2.71837	0.00656042	0.0550284	67.8013	46.3915	69.9406	50.009	64.0426	46.0768	69.4207	43.0885
Dolk	165.615	0.548195	0.421646	1.30013	0.193556	0.452105	12.3318	8.277	12.7871	9.58936	8.9745	7.56363	15.2337	7.678
1700023F06Rik	169.936	0.548054	0.433757	1.2635	0.206408	0.466787	12.6114	8.53505	16.5314	8.71291	9.34081	10.3029	11.962	6.58933
Lhx1	219.336	0.547879	0.369636	1.48221	0.138283	0.375419	16.4825	10.8112	24.6558	13.1983	10.9892	8.46309	13.8024	10.7721
Hmgcr	890.931	0.547639	0.204675	2.67565	0.00745849	0.0601937	66.0098	44.8557	62.7346	45.7814	57.388	41.1707	77.9066	47.6151
Eef1b2	3428.01	0.54753	0.139587	3.92249	8.76383e-05	0.00184372	253.204	173.37	257.438	163.174	248.722	178.624	253.452	178.313
Frat2	136.793	0.546833	0.449588	1.2163	0.223871	0.484127	10.1639	6.8583	12.5752	7.83646	7.69243	6.09179	10.224	6.64663
Haus4	106.245	0.546813	0.539488	1.01358	0.310785	0.579645	8.18184	5.03906	7.98312	5.10401	12.8818	5.60118	3.68063	4.41199
Hacl1	112.03	0.5467	0.507345	1.07757	0.281225	0.548976	8.40606	5.53473	11.9394	5.56801	6.83772	5.76472	6.4411	5.27147
2700050L05Rik	420.896	0.54648	0.348343	1.5688	0.116695	0.341422	31.7475	20.6279	17.026	24.2827	37.7296	18.5207	40.4869	19.0804
Atxn2	3611.71	0.546421	0.141989	3.84833	0.000118925	0.00235315	267.069	182.365	263.938	183.487	294.449	180.137	242.819	183.47
C1qbp	1256.21	0.546389	0.19283	2.83353	0.00460368	0.0426608	92.7894	63.531	88.6621	68.3628	87.3641	65.9058	102.342	56.3245
Aif1	53.8923	0.546379	0.702538	0.777722	0.436733	0.691698	4.03343	2.67281	2.61394	2.57778	4.57883	2.57572	4.9075	2.86493
Polr2k	310.267	0.546327	0.401392	1.36108	0.173487	0.427681	23.7891	14.8198	28.4001	15.0543	32.8455	12.9604	10.1217	16.4447
Phf15	2514.28	0.546208	0.152142	3.59011	0.000330536	0.00556301	186.189	126.682	208.762	134.148	195.73	127.233	154.075	118.665
Ccnd2	619.948	0.545772	0.232754	2.34485	0.0190347	0.113624	45.8125	31.3324	49.5943	30.985	42.8578	30.8678	44.9855	32.1445
Dpm3	81.8532	0.545729	0.7072	0.771675	0.440307	0.69478	6.79599	3.38965	13.5642	3.40268	5.49459	2.98457	1.32912	3.7817
Myo9a	4401.99	0.545679	0.144177	3.78478	0.000153845	0.0029137	325.827	221.946	280.681	226.072	367.588	216.647	329.212	223.121
Gpr56	717.66	0.545582	0.236427	2.30761	0.0210207	0.121429	52.7941	36.51	50.9366	43.513	57.1438	30.3772	50.3019	35.6397
Gtf2i	4924.57	0.545395	0.137995	3.95229	7.74072e-05	0.00165569	364.258	248.545	323.493	251.282	407.455	244.53	361.826	249.822
BC005764	1033.01	0.545358	0.200476	2.72032	0.00652191	0.0547939	76.556	51.989	70.1526	53.9788	68.0109	49.6747	91.5045	52.3136
Galnt11	527.481	0.545028	0.248139	2.19646	0.028059	0.146782	38.9001	26.7385	40.3395	30.2116	36.6917	24.7351	39.669	25.2687
Ube2u	9.97481	0.54493	1.6607	0.328133	0.742811	0.883902	0.819112	0.422131	1.27165	0.309334	0.0610511	0.613268	1.12464	0.343791
Gpr160	11.9108	0.544781	2.12724	0.256098	0.797875	0.911389	1.20067	0.281478	0	0.72178	3.60201	0.122654	0	0
Acad10	28.9527	0.54471	0.932744	0.583987	0.559229	0.779682	2.15232	1.45049	2.19006	1.856	1.40417	1.063	2.86271	1.43246
Itpkb	1383.04	0.544477	0.20162	2.70051	0.00692336	0.057028	102.894	69.2082	77.6412	72.7966	132.176	73.633	98.8658	61.1948
Ssrp1	2152.1	0.544278	0.153235	3.55192	0.000382428	0.00630682	158.832	108.97	155	103.214	159.038	113.455	162.459	110.242
Katna1	144.779	0.544053	0.440754	1.23437	0.217066	0.478719	10.7416	7.2743	13.211	7.42402	9.09661	7.23656	9.91725	7.16232
2310045N01Rik	248.518	0.543953	0.368969	1.47425	0.140414	0.377671	18.5689	12.3561	23.1723	11.0845	12.3934	12.6333	20.1412	13.3506
Mknk2	312.215	0.543762	0.335301	1.62171	0.104865	0.320231	23.1983	15.653	17.4498	16.3432	29.2435	13.6554	22.9017	16.9604
Npepps	2520.38	0.543411	0.172611	3.14818	0.00164288	0.0198574	187.737	125.894	147.229	122.806	245.242	128.418	170.74	126.458
Eno1	239.705	0.543373	0.404282	1.34405	0.178934	0.433972	17.9019	11.9264	17.4498	9.58936	25.2141	11.4068	11.0419	14.783
Dnm2	936.954	0.543174	0.209243	2.59591	0.00943418	0.0707163	69.3448	47.2476	56.8003	47.1735	76.497	44.605	74.7372	49.9643
Txndc17	532.219	0.542118	0.248014	2.18584	0.0288275	0.149142	39.2079	27.0202	39.633	24.5921	37.9127	26.3296	40.078	30.139
Fmnl3	190.137	0.542039	0.388249	1.39611	0.16268	0.411445	14.0092	9.65096	13.5642	11.0845	12.8207	8.29956	15.6427	9.56886
Sh3bgr	85.8737	0.542003	0.600838	0.902079	0.367015	0.631346	6.64405	4.04187	5.36918	4.12445	3.41886	4.04757	11.1441	3.9536
Bex4	866.181	0.541955	0.225618	2.40209	0.0163018	0.102457	63.778	44.0076	72.0601	37.2232	59.4637	43.4602	59.8102	51.3395
Map3k5	947.081	0.541527	0.201647	2.68552	0.00724162	0.0589632	69.9734	47.8792	77.7118	47.1219	61.3563	46.3222	70.8521	50.1935
Pcdhb15	52.3784	0.54148	0.729408	0.742356	0.457871	0.70897	3.97327	2.54459	2.04877	2.57778	5.37249	2.53484	4.49855	2.52114
Kdm1b	171.183	0.541286	0.453802	1.19278	0.232955	0.495638	12.9576	8.34398	9.04283	10.3627	9.27976	6.99125	20.5502	7.678
Sik1	589.787	0.541226	0.243991	2.21822	0.0265398	0.141643	43.4004	29.9913	43.236	35.3156	46.8872	27.5562	40.078	27.1022
[truncated: 14,080 more rows]
