# Supplementary material for: Developmental single-cell transcriptomics of hypothalamic POMC neurons reveal the genetic trajectories of multiple neuropeptidergic phenotypes
Source: eLife journal article supplement (doi:10.7554/elife.72883), 2022-01-19
Supplement: supp [file elife-72883-supp-v1.zip]

**A***Gad1**Vglut2**Gad1/Vglut2* combined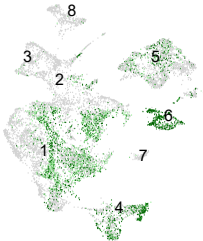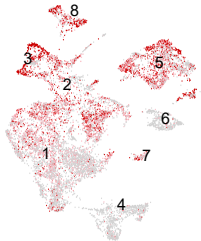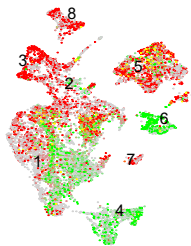**B**

GABAergic markers

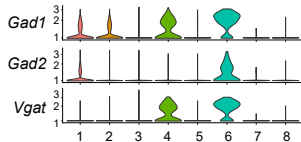

Glutamatergic markers

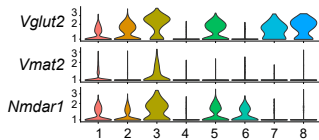

- 1. *Pomc*<sup>(high)</sup>/*Prdm12*
- 2. *Pomc*<sup>(med)</sup>/*Ebf1*
- 3. *Pomc*<sup>(med)</sup>/*Nr4a2*
- 4. *Pomc*<sup>(low)</sup>/*Otp*
- 5. *Pomc*<sup>(low)</sup>/*Tac2*
- 6. *Pomc*<sup>(low)</sup>/*Dlx5*
- 7. *Pomc*<sup>(low)</sup>/*Prdm13*
- 8. *Pomc*<sup>(low)</sup>/*Pitx2*
