# Supplementary material for: Developmental single-cell transcriptomics of hypothalamic POMC neurons reveal the genetic trajectories of multiple neuropeptidergic phenotypes
Source: eLife journal article supplement (doi:10.7554/elife.72883), 2022-01-19
Supplement: supp [file elife-72883-supp-v1.zip]

| E11.5                         | E13.5                         | E15.5                         | E17.5               | P5                             | P12                                         | Integrated Clusters                                                                                  |
|-------------------------------|-------------------------------|-------------------------------|---------------------|--------------------------------|---------------------------------------------|------------------------------------------------------------------------------------------------------|
| E11.5-1                       | E13.5-2<br>E13.5-3            | E15.5-2<br>E15.5-6            | E17.5-4             | P5-1                           | P12-3                                       | 1. <i>Pomc</i> <sup>(high)</sup> / <i>Prdm12</i>                                                     |
| E11.5-9                       | E13.5-4                       | E15.5-1<br>E15.5-3            | E17.5-3<br>E17.5-1  | P5-10<br>P5-1<br>P5-2<br>P5-11 | P12-13<br>P12-3<br>P12-11<br>P12-14         | 4. <i>Pomc</i> <sup>(low)</sup> / <i>Otp</i><br><br>1. <i>Pomc</i> <sup>(high)</sup> / <i>Prdm12</i> |
| E11.5-5<br>E11.5-6<br>E11.5-2 | E13.5-5<br>E13.5-1            | E15.5-10<br>E15.5-10          |                     |                                |                                             | 2. <i>Pomc</i> <sup>(med)</sup> / <i>Ebf1</i>                                                        |
|                               | E13.5-7<br>E13.5-8<br>E13.5-9 | E15.5-4<br>E15.5-4<br>E15.5-9 | E17.5-9?<br>E17.5-9 | P5-7<br>P5-7                   | P12-9<br>P12-9                              | 3. <i>Pomc</i> <sup>(med)</sup> / <i>Nr4a2</i><br><br>8. <i>Pomc</i> <sup>(low)</sup> / <i>Pitx2</i> |
| E11.5-4<br>E11.5-8            | E13.5-10                      | E15.5-11                      |                     |                                |                                             | 3. <i>Pomc</i> <sup>(med)</sup> / <i>Nr4a2</i>                                                       |
|                               |                               | E15.5-5                       | E17.5-2<br>E17.5-6  | P5-8<br>P5-3<br>P5-6           | P12-7<br>P12-7                              | 5. <i>Pomc</i> <sup>(low)</sup> / <i>Tac2</i>                                                        |
|                               |                               | E15.5-7                       | E17.5-7             | P5-9                           | P12-12                                      | 6. <i>Pomc</i> <sup>(low)</sup> / <i>Dlx5</i>                                                        |
|                               |                               |                               | E17.5-5<br>E17.5-8  | P5-4                           | P12-10                                      | 2. <i>Pomc</i> <sup>(med)</sup> / <i>Ebf1</i>                                                        |
|                               |                               | E15.5-12                      |                     | P5-5<br>P5-13                  | P12-1<br>P12-2<br>P12-5<br>P12-6?<br>P12-8? | 9.Microglia                                                                                          |
| E11.5-3                       | E13.5-6                       | E15.5-8                       |                     |                                | P12-6?<br>P12-8?                            | 10. VLMC                                                                                             |
|                               |                               |                               |                     | P5-12                          | P12-4<br>P12-15                             | 11. Astrocytes                                                                                       |
