# Supplementary material for: Developmental single-cell transcriptomics of hypothalamic POMC neurons reveal the genetic trajectories of multiple neuropeptidergic phenotypes
Source: eLife journal article supplement (doi:10.7554/elife.72883), 2022-01-19

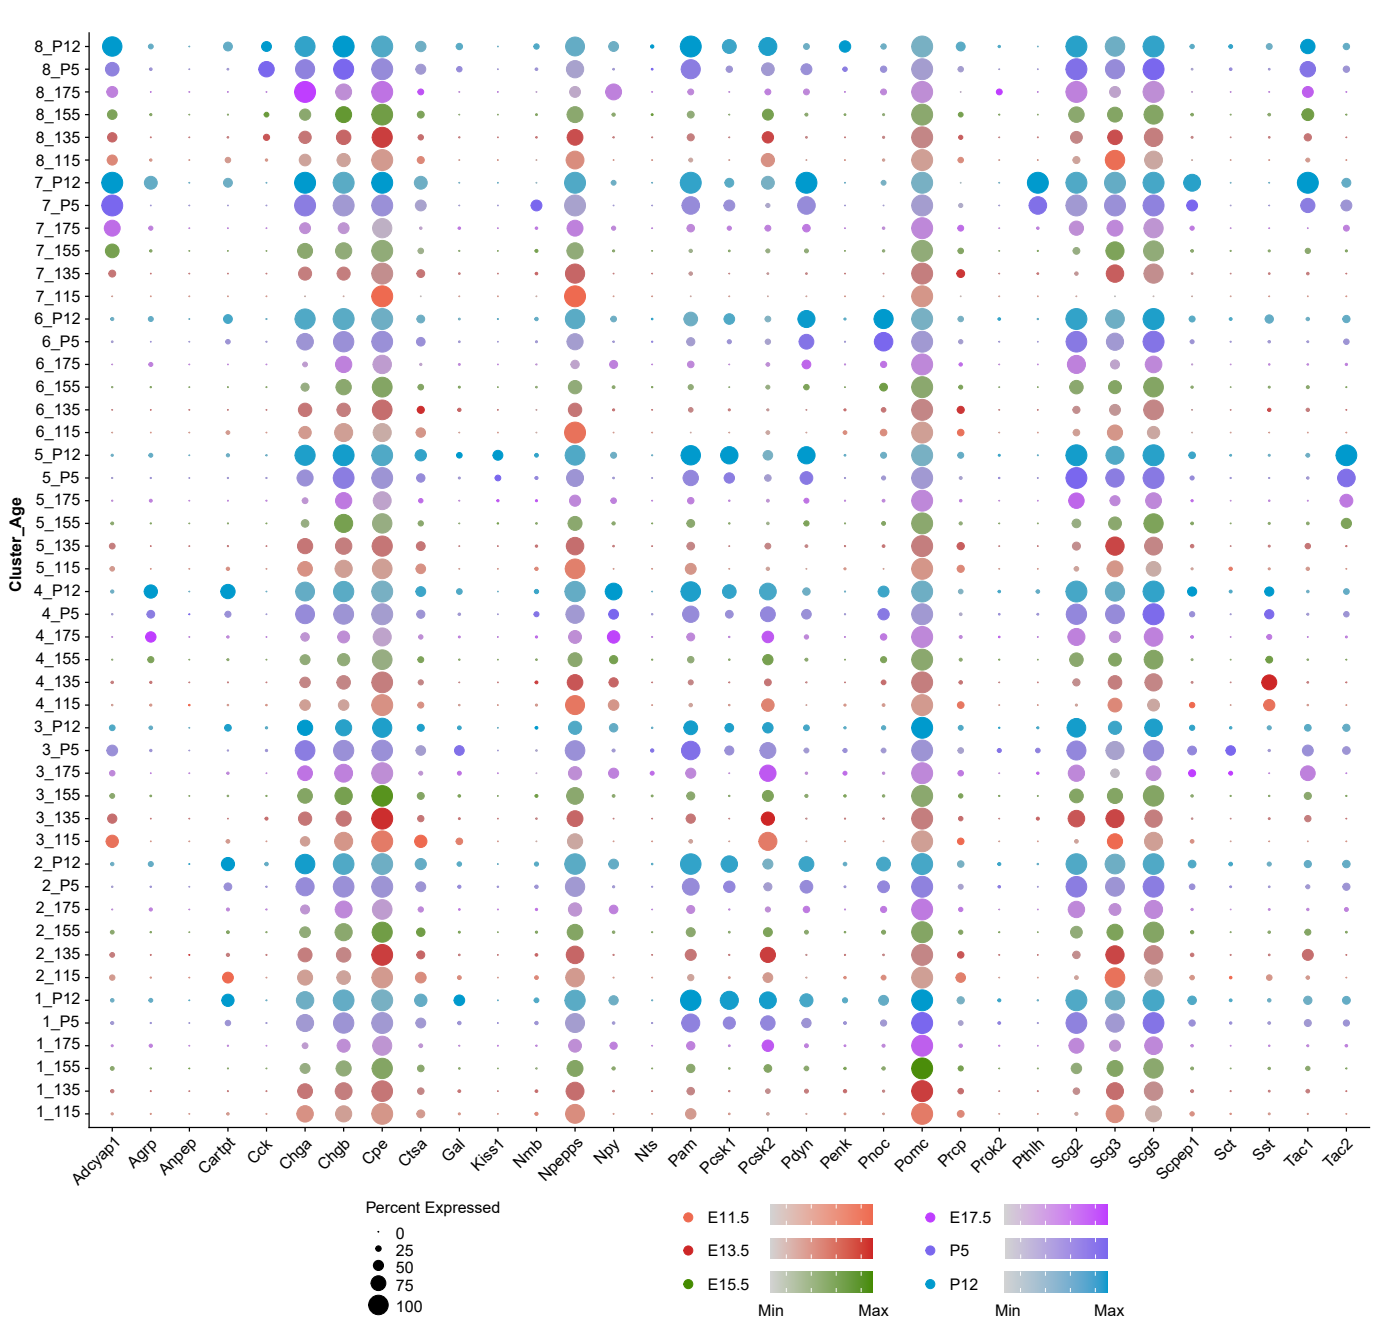

Supplement: supp [file elife-72883-supp-v1.zip]
