# Supplementary figures and images for: Developmental single-cell transcriptomics of hypothalamic POMC neurons reveal the genetic trajectories of multiple neuropeptidergic phenotypes
Source: eLife journal article supplement (doi:10.7554/elife.72883), 2022-01-19

**A**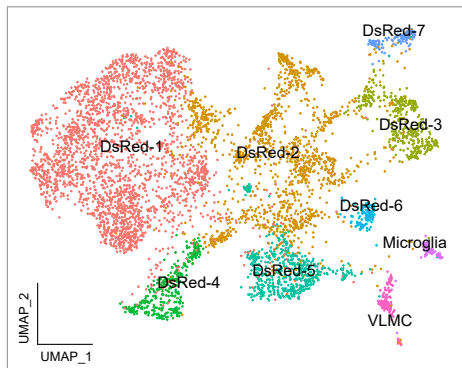

- DsRed-1 *Prdm12*
- DsRed-2 *Ebf1*
- DsRed-3 *Nr4a2*
- DsRed-4 *Otp*
- DsRed-5 *Tac2*
- DsRed-6 *Dlx5*
- DsRed-7 *Pitx2*

| E11.5 | E13.5 | E15.5 | E17.5 | P5  | P12 |
|-------|-------|-------|-------|-----|-----|
| 462   | 431   | 364   | 155   | 734 | 344 |
| 635   | 478   | 66    | 41    | 167 | 74  |
| 45    | 53    | 107   | 10    | 155 | 19  |
| 30    | 58    | 156   | 66    | 30  | 9   |
| 30    | 30    | 156   | 175   | 143 | 28  |
| 5     | 7     | 41    | 15    | 46  | 16  |
| 5     | 73    | 21    | 2     | 14  | 12  |

**B**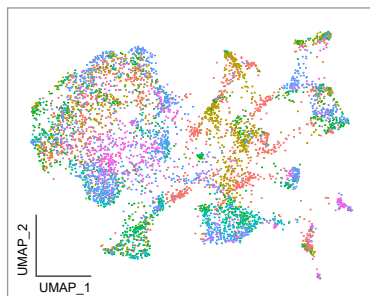

|         | Cell # |
|---------|--------|
| ● E11.5 | 1273   |
| ● E13.5 | 1162   |
| ● E15.5 | 926    |
| ● E17.5 | 465    |
| ● P5    | 576    |
| ● P12   | 1322   |

**C**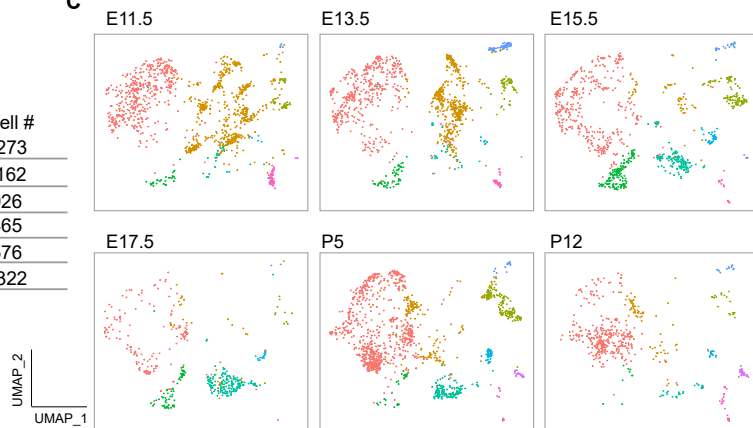

Supplement: supp [file elife-72883-supp-v1.zip]

A

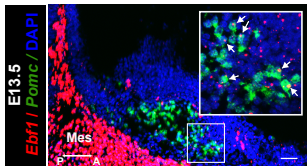

B

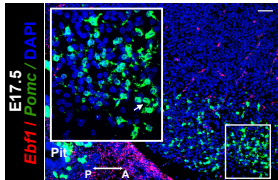

C

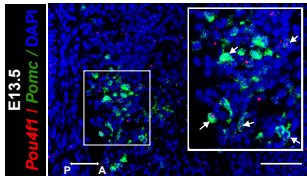

D

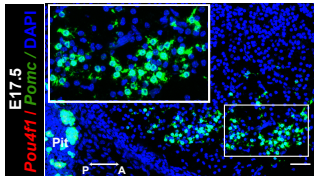

Supplement: supp [file elife-72883-supp-v1.zip]

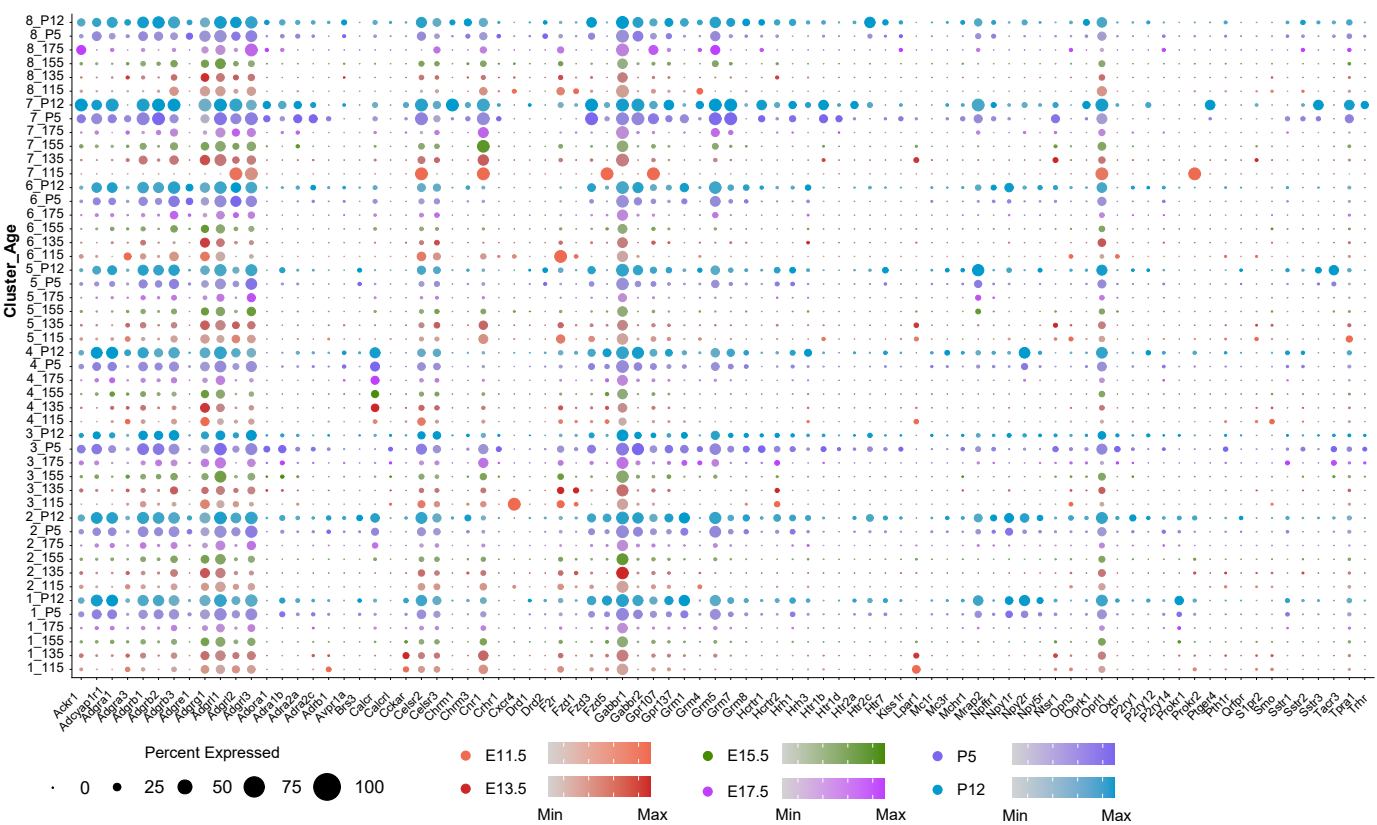

Supplement: supp [file elife-72883-supp-v1.zip]

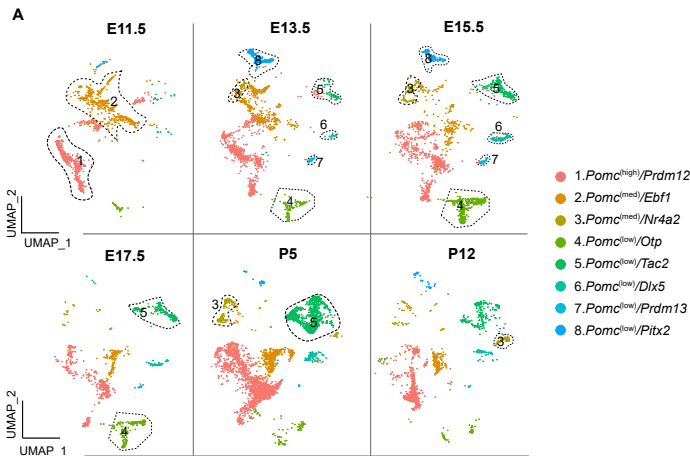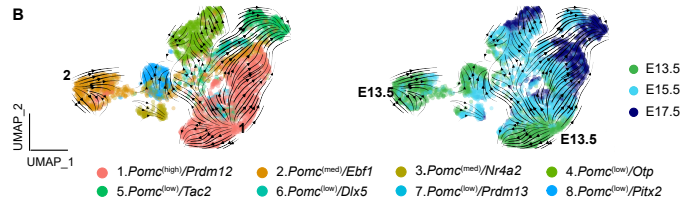

Supplement: supp [file elife-72883-supp-v1.zip]

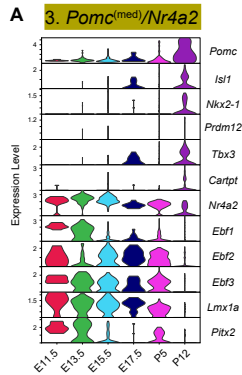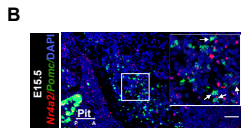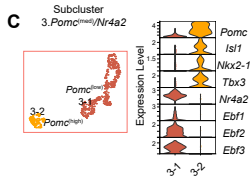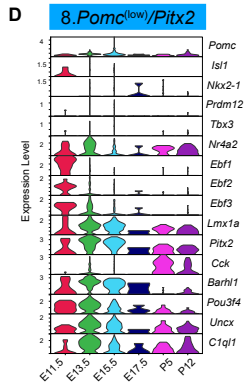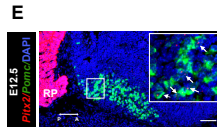

Supplement: supp [file elife-72883-supp-v1.zip]

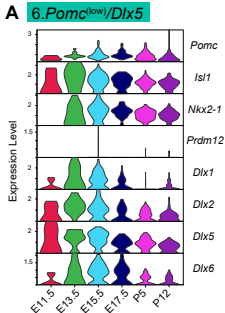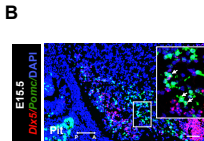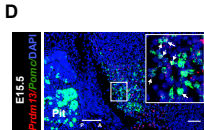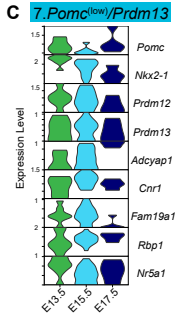

Supplement: supp [file elife-72883-supp-v1.zip]
